# Supplementary material for: Genetic and epigenetic driven variation in regulatory regions activity contribute to adaptation and evolution under endocrine treatment
Source: Research Square preprint supplement (doi:10.21203/rs.3.rs-1432636/v1), 2022-03-30
Supplement: Supplementary file 1 [file 4a7b6613737e0bc0f8d371aa.xlsx]

## Sheet: S1
chrom	start	end	PROMOTER	ENHANCER	CTCF	covered_by_baits	sgRNAs_n
chr1	850502	850620	0	0	1	TRUE	0
chr1	869868	869986	0	0	1	TRUE	0
chr1	873115	873233	0	0	1	TRUE	0
chr1	923346	924740	0	1	0	TRUE	14
chr1	952547	952738	0	1	0	TRUE	3
chr1	995751	996307	0	1	0	TRUE	7
chr1	998447	999730	0	1	0	TRUE	12
chr1	999864	1000172	0	1	0	TRUE	7
chr1	1080968	1081457	0	1	0	TRUE	4
chr1	1121335	1122771	0	1	0	TRUE	15
chr1	1122843	1123472	0	1	0	TRUE	5
chr1	1142471	1142795	0	1	0	TRUE	4
chr1	1143295	1143509	0	1	0	TRUE	4
chr1	1143933	1144953	0	1	0	TRUE	9
chr1	1145090	1145454	0	1	0	TRUE	5
chr1	1156113	1156823	0	1	0	TRUE	4
chr1	1156972	1158942	0	1	0	TRUE	20
chr1	1162446	1163852	0	1	0	TRUE	14
chr1	1164579	1165226	0	1	0	TRUE	7
chr1	1165251	1165477	0	1	0	TRUE	5
chr1	1284012	1284130	0	0	1	TRUE	4
chr1	1284919	1285037	0	0	1	TRUE	6
chr1	1286432	1286550	0	0	1	TRUE	6
chr1	1290281	1290399	0	0	1	TRUE	4
chr1	1291968	1292086	0	0	1	TRUE	5
chr1	1300525	1300643	0	0	1	TRUE	4
chr1	1302066	1302184	0	0	1	TRUE	0
chr1	1302840	1302958	0	0	1	TRUE	6
chr1	1305341	1305459	0	0	1	TRUE	3
chr1	1306217	1306335	0	0	1	TRUE	4
chr1	1308461	1308688	0	0	1	TRUE	6
chr1	1310137	1310255	0	0	1	TRUE	3
chr1	1312929	1313047	0	0	1	TRUE	5
chr1	1332279	1332397	0	0	1	TRUE	4
chr1	1344119	1344237	0	0	1	TRUE	3
chr1	1349900	1350018	0	0	1	TRUE	3
chr1	1354785	1354903	0	0	1	TRUE	5
chr1	1362092	1362210	0	0	1	TRUE	5
chr1	1364332	1364450	0	0	1	TRUE	4
chr1	1372174	1372292	0	0	1	TRUE	3
chr1	1374215	1375182	0	1	0	TRUE	11
chr1	1375208	1375326	0	0	1	TRUE	5
chr1	1376456	1376574	0	0	1	TRUE	6
chr1	1384000	1384118	0	0	1	TRUE	5
chr1	1390709	1390827	0	0	1	TRUE	3
chr1	1536665	1536875	0	1	0	TRUE	4
chr1	1781193	1781510	0	1	0	TRUE	3
chr1	1781602	1781887	0	1	0	TRUE	1
chr1	1782086	1783325	0	1	0	TRUE	13
chr1	1832232	1833232	1	0	0	TRUE	0
chr1	1889991	1890109	0	0	1	TRUE	5
chr1	1890641	1891867	1	0	0	TRUE	4
chr1	1899303	1899421	0	0	1	TRUE	6
chr1	1906356	1906474	0	0	1	TRUE	3
chr1	1907343	1907461	0	0	1	TRUE	3
chr1	1909079	1909197	0	0	1	TRUE	7
chr1	1919030	1919148	0	0	1	TRUE	6
chr1	1923734	1923852	0	0	1	TRUE	7
chr1	1935837	1935955	0	0	1	TRUE	0
chr1	1941818	1941936	0	0	1	TRUE	5
chr1	1944110	1944228	0	0	1	TRUE	3
chr1	1955328	1955446	0	0	1	TRUE	4
chr1	1955719	1955837	0	0	1	TRUE	5
chr1	2049270	2049469	0	1	0	TRUE	5
chr1	2227944	2228974	1	0	0	TRUE	0
chr1	2235888	2235951	1	0	0	TRUE	0
chr1	2235998	2236294	1	0	0	TRUE	0
chr1	2236766	2236888	1	0	0	TRUE	0
chr1	2246503	2247023	1	0	0	TRUE	0
chr1	2374091	2374209	0	0	1	TRUE	4
chr1	2381322	2381440	0	0	1	TRUE	6
chr1	2381865	2381983	0	0	1	TRUE	4
chr1	2385054	2385172	0	0	1	TRUE	5
chr1	2391757	2391875	0	0	1	TRUE	7
chr1	2408656	2408774	0	0	1	TRUE	5
chr1	2411907	2412571	0	0	1	TRUE	9
chr1	2413179	2413297	0	0	1	TRUE	5
chr1	2414503	2414621	0	0	1	TRUE	4
chr1	2415601	2415719	0	0	1	TRUE	4
chr1	2416047	2416165	0	0	1	TRUE	5
chr1	2430180	2430298	0	0	1	TRUE	3
chr1	2527994	2528459	0	1	0	TRUE	4
chr1	2528975	2529783	0	1	0	TRUE	9
chr1	2543125	2543341	0	1	0	TRUE	5
chr1	2543517	2545211	0	1	0	TRUE	17
chr1	2548662	2549116	0	1	0	TRUE	0
chr1	2556364	2557011	0	1	0	TRUE	7
chr1	2592657	2593157	0	1	0	TRUE	5
chr1	2593914	2594599	0	1	0	TRUE	5
chr1	2597016	2597262	0	1	0	TRUE	0
chr1	3583904	3584164	0	1	0	TRUE	4
chr1	3649522	3650107	0	1	0	TRUE	7
chr1	3668936	3669054	0	0	1	TRUE	4
chr1	3672443	3672561	0	0	1	TRUE	4
chr1	3672706	3672829	0	1	0	TRUE	5
chr1	3673239	3673357	0	0	1	TRUE	6
chr1	3677195	3677313	0	0	1	TRUE	4
chr1	3678394	3678512	0	0	1	TRUE	5
chr1	3688532	3688650	0	0	1	TRUE	6
chr1	3689988	3690106	0	0	1	TRUE	6
chr1	3695741	3695859	0	0	1	TRUE	4
chr1	3698762	3698880	0	0	1	TRUE	4
chr1	3699072	3699190	0	0	1	TRUE	4
chr1	3703111	3703229	0	0	1	TRUE	3
chr1	3708147	3708265	0	0	1	TRUE	5
chr1	3709143	3709261	0	0	1	TRUE	5
chr1	3714435	3714748	0	1	0	TRUE	5
chr1	3717559	3717677	0	0	1	TRUE	5
chr1	3718879	3718997	0	0	1	TRUE	5
chr1	3724533	3724651	0	0	1	TRUE	0
chr1	3727352	3727470	0	0	1	TRUE	5
chr1	3732660	3732778	0	0	1	TRUE	3
chr1	3741850	3741968	0	0	1	TRUE	4
chr1	3756480	3756598	0	0	1	TRUE	4
chr1	3762400	3762518	0	0	1	TRUE	6
chr1	3815030	3815148	0	0	1	TRUE	4
chr1	3827854	3827972	0	0	1	TRUE	3
chr1	3857501	3857619	0	0	1	TRUE	5
chr1	3858231	3858349	0	0	1	TRUE	4
chr1	3858921	3859039	0	0	1	TRUE	4
chr1	3870013	3870131	0	0	1	TRUE	6
chr1	4563831	4563949	0	0	1	TRUE	4
chr1	4585336	4585454	0	0	1	TRUE	5
chr1	4594470	4594588	0	0	1	TRUE	3
chr1	4627484	4627602	0	0	1	TRUE	5
chr1	5980160	5980278	0	0	1	TRUE	5
chr1	5980497	5980615	0	0	1	TRUE	4
chr1	5992297	5992473	0	0	1	TRUE	8
chr1	5994721	5994839	0	0	1	TRUE	5
chr1	5995401	5995519	0	0	1	TRUE	4
chr1	6001460	6001578	0	0	1	TRUE	4
chr1	6003150	6003268	0	0	1	TRUE	3
chr1	6005671	6005789	0	0	1	TRUE	4
chr1	6026034	6026152	0	0	1	TRUE	3
chr1	6028707	6028825	0	0	1	TRUE	6
chr1	6035821	6035939	0	0	1	TRUE	5
chr1	6041575	6041693	0	0	1	TRUE	4
chr1	6048198	6048316	0	0	1	TRUE	5
chr1	6053046	6053164	0	0	1	TRUE	3
chr1	6161638	6161892	0	1	0	TRUE	7
chr1	6180426	6180544	0	0	1	TRUE	4
chr1	6180901	6181019	0	0	1	TRUE	5
chr1	6183617	6183735	0	0	1	TRUE	5
chr1	6185921	6186039	0	0	1	TRUE	3
chr1	6199369	6200304	1	0	0	TRUE	2
chr1	6205321	6205439	0	0	1	TRUE	4
chr1	6209781	6209899	0	0	1	TRUE	0
chr1	6210764	6210882	0	0	1	TRUE	5
chr1	6227327	6227445	0	0	1	TRUE	3
chr1	6238761	6238879	0	0	1	TRUE	3
chr1	6245167	6245285	0	0	1	TRUE	4
chr1	6246837	6246955	0	0	1	TRUE	5
chr1	6249374	6249492	0	0	1	TRUE	5
chr1	6252715	6252833	0	0	1	TRUE	5
chr1	6331837	6332045	0	1	0	TRUE	3
chr1	6423568	6423686	0	0	1	TRUE	4
chr1	6431688	6431806	0	0	1	TRUE	0
chr1	6435719	6435837	0	0	1	TRUE	0
chr1	6437146	6437264	0	0	1	TRUE	0
chr1	6438142	6438260	0	0	1	TRUE	3
chr1	6441707	6441825	0	0	1	TRUE	4
chr1	6443367	6443485	0	0	1	TRUE	0
chr1	6445247	6445365	0	0	1	TRUE	0
chr1	6446032	6446150	0	0	1	TRUE	0
chr1	6447329	6447447	0	0	1	TRUE	0
chr1	6447473	6447591	0	0	1	TRUE	0
chr1	6448274	6448392	0	0	1	TRUE	5
chr1	6448833	6448951	0	0	1	TRUE	0
chr1	6455124	6455242	0	0	1	TRUE	4
chr1	6456451	6456569	0	0	1	TRUE	4
chr1	6456922	6457040	0	0	1	TRUE	1
chr1	6462535	6462653	0	0	1	TRUE	5
chr1	6464653	6464771	0	0	1	TRUE	6
chr1	6471153	6471271	0	0	1	TRUE	7
chr1	6472534	6472652	0	0	1	TRUE	3
chr1	6475623	6475741	0	0	1	TRUE	4
chr1	6480926	6481044	0	0	1	TRUE	3
chr1	6483145	6483263	0	0	1	TRUE	3
chr1	6484551	6484669	0	0	1	TRUE	5
chr1	6486586	6486704	0	0	1	TRUE	4
chr1	6489988	6490106	0	0	1	TRUE	6
chr1	6588236	6588523	0	1	0	TRUE	4
chr1	6627138	6627348	0	1	0	TRUE	3
chr1	7198796	7198914	0	0	1	TRUE	5
chr1	7207784	7207902	0	0	1	TRUE	3
chr1	7218367	7218485	0	0	1	TRUE	0
chr1	7224875	7224993	0	0	1	TRUE	5
chr1	7246052	7246170	0	0	1	TRUE	4
chr1	7468989	7470001	0	1	0	TRUE	6
chr1	7470828	7471634	0	1	0	TRUE	5
chr1	7471755	7472243	0	1	0	TRUE	6
chr1	7505528	7505738	0	1	0	TRUE	3
chr1	7577314	7577546	0	1	0	TRUE	5
chr1	7632226	7632344	0	0	1	TRUE	4
chr1	7640054	7640172	0	0	1	TRUE	5
chr1	7641911	7642029	0	0	1	TRUE	3
chr1	7644202	7644320	0	0	1	TRUE	4
chr1	7647356	7647474	0	0	1	TRUE	4
chr1	7651765	7651883	0	0	1	TRUE	6
chr1	7652683	7652801	0	0	1	TRUE	3
chr1	7667656	7667774	0	0	1	TRUE	4
chr1	7675908	7676026	0	0	1	TRUE	4
chr1	7902884	7903002	0	0	1	TRUE	4
chr1	7932918	7933036	0	0	1	TRUE	4
chr1	7938195	7938313	0	0	1	TRUE	0
chr1	7942423	7942541	0	0	1	TRUE	0
chr1	7975344	7975462	0	0	1	TRUE	3
chr1	7982425	7982543	0	0	1	TRUE	4
chr1	7984953	7985071	0	0	1	TRUE	0
chr1	8015121	8015239	0	0	1	TRUE	3
chr1	8016675	8016793	0	0	1	TRUE	0
chr1	8026081	8027083	1	0	0	TRUE	0
chr1	8314422	8314540	0	0	1	TRUE	0
chr1	8315904	8316022	0	0	1	TRUE	4
chr1	8317677	8317795	0	0	1	TRUE	4
chr1	8339363	8339481	0	0	1	TRUE	5
chr1	8342476	8342594	0	0	1	TRUE	3
chr1	8343937	8344055	0	0	1	TRUE	5
chr1	8349112	8349230	0	0	1	TRUE	5
chr1	8351794	8351912	0	0	1	TRUE	5
chr1	8353499	8353617	0	0	1	TRUE	5
chr1	8359371	8359489	0	0	1	TRUE	5
chr1	8374935	8375053	0	0	1	TRUE	3
chr1	8439600	8439718	0	0	1	TRUE	3
chr1	8443971	8444089	0	0	1	TRUE	0
chr1	8460138	8460256	0	0	1	TRUE	0
chr1	8465213	8465331	0	0	1	TRUE	0
chr1	8859535	8859653	0	0	1	TRUE	0
chr1	8862586	8862704	0	0	1	TRUE	4
chr1	8866166	8866284	0	0	1	TRUE	0
chr1	8871677	8871795	0	0	1	TRUE	3
chr1	8872182	8872300	0	0	1	TRUE	0
chr1	8878834	8879092	0	1	0	TRUE	5
chr1	8879419	8879537	0	0	1	TRUE	7
chr1	8889669	8889787	0	0	1	TRUE	0
chr1	8890164	8890282	0	0	1	TRUE	4
chr1	8903635	8903753	0	0	1	TRUE	0
chr1	8910462	8910580	0	0	1	TRUE	3
chr1	8911165	8911283	0	0	1	TRUE	3
chr1	8915309	8915427	0	0	1	TRUE	0
chr1	8918210	8918328	0	0	1	TRUE	0
chr1	9010047	9010228	0	1	0	TRUE	4
chr1	9024812	9024930	0	0	1	TRUE	4
chr1	9058519	9058637	0	0	1	TRUE	3
chr1	9069706	9069824	0	0	1	TRUE	4
chr1	9094197	9094315	0	0	1	TRUE	3
chr1	9234803	9235544	0	1	0	TRUE	7
chr1	9257685	9257884	0	1	0	TRUE	6
chr1	9267450	9267564	0	1	0	TRUE	4
chr1	9593981	9594099	0	0	1	TRUE	5
chr1	9595098	9595334	0	1	0	TRUE	5
chr1	9601194	9601312	0	0	1	TRUE	5
chr1	9604261	9604379	0	0	1	TRUE	5
chr1	9615708	9615826	0	0	1	TRUE	0
chr1	9627134	9627252	0	0	1	TRUE	7
chr1	9651731	9653071	0	0	1	TRUE	13
chr1	9653174	9653487	0	1	0	TRUE	4
chr1	9654200	9654318	0	0	1	TRUE	3
chr1	9702376	9702494	0	0	1	TRUE	3
chr1	9714303	9714421	0	0	1	TRUE	0
chr1	9717394	9717512	0	0	1	TRUE	4
chr1	9720458	9720576	0	0	1	TRUE	5
chr1	9721915	9722033	0	0	1	TRUE	4
chr1	9725164	9725282	0	0	1	TRUE	3
chr1	9735984	9736102	0	0	1	TRUE	0
chr1	9769188	9769306	0	0	1	TRUE	0
chr1	9852074	9852389	0	1	0	TRUE	4
chr1	10209955	10210955	1	0	0	TRUE	4
chr1	10377530	10377648	0	0	1	TRUE	3
chr1	10415414	10415532	0	0	1	TRUE	3
chr1	10419520	10419638	0	0	1	TRUE	3
chr1	10421964	10422082	0	0	1	TRUE	0
chr1	10428187	10428305	0	0	1	TRUE	0
chr1	10430315	10430433	0	0	1	TRUE	5
chr1	10463499	10463617	0	0	1	TRUE	0
chr1	10471784	10472556	0	0	1	TRUE	9
chr1	10474945	10475566	0	0	1	TRUE	7
chr1	10494769	10494887	0	0	1	TRUE	4
chr1	10537601	10537701	0	1	0	TRUE	0
chr1	10634492	10636540	0	1	0	TRUE	16
chr1	10759355	10759522	0	1	0	TRUE	4
chr1	11012230	11012348	0	0	1	TRUE	3
chr1	11012621	11013434	0	0	1	TRUE	9
chr1	11037722	11037840	0	0	1	TRUE	0
chr1	11054570	11054688	0	0	1	TRUE	3
chr1	11054981	11055099	0	0	1	TRUE	0
chr1	11241824	11241942	0	0	1	TRUE	3
chr1	11248271	11248389	0	0	1	TRUE	3
chr1	11262607	11262725	0	0	1	TRUE	5
chr1	11272911	11273029	0	0	1	TRUE	4
chr1	11286340	11286458	0	0	1	TRUE	0
chr1	11296032	11296150	0	0	1	TRUE	5
chr1	11664092	11665129	0	1	0	TRUE	12
chr1	11701692	11701876	0	1	0	TRUE	3
chr1	11714888	11715168	0	1	0	TRUE	5
chr1	11908153	11910232	0	1	0	TRUE	10
chr1	11908153	11910232	0	1	0	TRUE	10
chr1	11934666	11935401	0	1	0	TRUE	5
chr1	12031381	12031499	0	0	1	TRUE	4
chr1	12051944	12052062	0	0	1	TRUE	3
chr1	12053143	12053261	0	0	1	TRUE	3
chr1	12059771	12059889	0	0	1	TRUE	3
chr1	12063467	12063585	0	0	1	TRUE	5
chr1	12064722	12064840	0	0	1	TRUE	4
chr1	12079712	12079830	0	0	1	TRUE	4
chr1	12081704	12081822	0	0	1	TRUE	0
chr1	12167002	12169054	0	1	0	TRUE	21
chr1	12169082	12169308	0	1	0	TRUE	4
chr1	12170144	12170671	0	1	0	TRUE	3
chr1	12171552	12171805	0	1	0	TRUE	0
chr1	12171970	12172405	0	1	0	TRUE	5
chr1	12173544	12174162	0	1	0	TRUE	5
chr1	12174816	12175761	0	1	0	TRUE	6
chr1	12229145	12229263	0	0	1	TRUE	0
chr1	12229889	12230007	0	0	1	TRUE	5
chr1	12232741	12232859	0	0	1	TRUE	0
chr1	12244231	12244349	0	0	1	TRUE	3
chr1	12272199	12272317	0	0	1	TRUE	0
chr1	12275512	12275630	0	0	1	TRUE	0
chr1	12585484	12585826	0	1	0	TRUE	0
chr1	12594886	12596904	1	1	0	TRUE	0
chr1	12597802	12598032	0	1	0	TRUE	3
chr1	12598051	12598232	0	1	0	TRUE	2
chr1	12616534	12616934	1	0	0	TRUE	0
chr1	12617001	12617430	1	0	0	TRUE	0
chr1	12617478	12617788	1	0	0	TRUE	0
chr1	12617789	12619111	1	0	0	TRUE	0
chr1	12659103	12659221	0	0	1	TRUE	4
chr1	12779118	12779236	0	0	1	TRUE	0
chr1	12798389	12798507	0	0	1	TRUE	0
chr1	13422695	13422813	0	0	1	TRUE	0
chr1	13427371	13427489	0	0	1	TRUE	0
chr1	13451563	13451681	0	0	1	TRUE	4
chr1	13469452	13469570	0	0	1	TRUE	3
chr1	13699458	13700489	1	0	0	TRUE	0
chr1	13704151	13704472	1	0	0	TRUE	0
chr1	13714876	13715769	1	0	0	TRUE	0
chr1	13730545	13731348	1	0	0	TRUE	0
chr1	13748630	13750385	1	1	0	TRUE	5
chr1	13750393	13750714	1	1	0	TRUE	0
chr1	13765123	13765241	0	0	1	TRUE	3
chr1	13770970	13771166	1	0	0	TRUE	0
chr1	13771830	13771970	1	0	0	TRUE	0
chr1	13788921	13789039	0	0	1	TRUE	0
chr1	13793177	13793295	0	0	1	TRUE	3
chr1	13795470	13795588	0	0	1	TRUE	3
chr1	13801032	13801150	0	0	1	TRUE	4
chr1	13801778	13801896	0	0	1	TRUE	3
chr1	13807558	13807676	0	0	1	TRUE	4
chr1	13808837	13808955	0	0	1	TRUE	4
chr1	13809894	13810012	0	0	1	TRUE	0
chr1	13811330	13811448	0	0	1	TRUE	4
chr1	13813749	13813867	0	0	1	TRUE	3
chr1	13816058	13816176	0	0	1	TRUE	0
chr1	13825190	13825308	0	0	1	TRUE	3
chr1	13828972	13829090	0	0	1	TRUE	4
chr1	13892636	13893643	1	0	0	TRUE	0
chr1	14567210	14567328	0	0	1	TRUE	0
chr1	14571986	14572104	0	0	1	TRUE	5
chr1	14597966	14598971	1	0	0	TRUE	2
chr1	14599037	14599155	0	0	1	TRUE	7
chr1	14599299	14599417	0	0	1	TRUE	6
chr1	14627300	14627501	0	1	0	TRUE	4
chr1	14923378	14923419	1	0	0	TRUE	0
chr1	14923681	14924891	1	0	0	TRUE	4
chr1	14928465	14928745	1	0	0	TRUE	0
chr1	14929282	14929975	1	0	0	TRUE	0
chr1	14944853	14945025	1	0	0	TRUE	0
chr1	14945078	14946168	1	0	0	TRUE	0
chr1	14996900	14997084	0	1	0	TRUE	0
chr1	14999340	14999570	0	1	0	TRUE	5
chr1	15063615	15064053	1	0	0	TRUE	0
chr1	15110974	15111092	0	0	1	TRUE	0
chr1	15112409	15112527	0	0	1	TRUE	3
chr1	15128645	15128763	0	0	1	TRUE	4
chr1	15154169	15154287	0	0	1	TRUE	6
chr1	15501532	15501650	0	0	1	TRUE	3
chr1	15507336	15507454	0	0	1	TRUE	4
chr1	15526489	15526607	0	0	1	TRUE	6
chr1	15684331	15685462	0	1	0	TRUE	11
chr1	15732105	15732223	0	0	1	TRUE	5
chr1	15736537	15736655	0	0	1	TRUE	5
chr1	15739885	15740003	0	0	1	TRUE	0
chr1	15741481	15741599	0	0	1	TRUE	4
chr1	15744118	15744236	0	0	1	TRUE	5
chr1	15757629	15757747	0	0	1	TRUE	5
chr1	15762620	15762738	0	0	1	TRUE	3
chr1	15784269	15784387	0	0	1	TRUE	0
chr1	15792145	15792263	0	0	1	TRUE	4
chr1	15831814	15832393	0	1	0	TRUE	0
chr1	15833099	15833683	0	1	0	TRUE	3
chr1	15833099	15833683	0	1	0	TRUE	3
chr1	15836873	15837805	0	1	0	TRUE	7
chr1	15847113	15848113	1	0	0	TRUE	0
chr1	16007179	16007297	0	0	1	TRUE	4
chr1	16009138	16009256	0	0	1	TRUE	4
chr1	16013197	16013315	0	0	1	TRUE	6
chr1	16017408	16017526	0	0	1	TRUE	6
chr1	16020404	16020522	0	0	1	TRUE	0
chr1	16026450	16026568	0	0	1	TRUE	4
chr1	16027248	16027366	0	0	1	TRUE	4
chr1	16032954	16033072	0	0	1	TRUE	0
chr1	16042216	16042334	0	0	1	TRUE	4
chr1	16046936	16047054	0	0	1	TRUE	4
chr1	16048250	16048368	0	0	1	TRUE	0
chr1	16048673	16048791	0	0	1	TRUE	3
chr1	16056208	16056326	0	0	1	TRUE	0
chr1	16064559	16064677	0	0	1	TRUE	4
chr1	16067057	16067185	0	1	0	TRUE	6
chr1	16070281	16070541	0	1	0	TRUE	0
chr1	16073199	16073317	0	0	1	TRUE	6
chr1	16076171	16076289	0	0	1	TRUE	4
chr1	16078994	16079112	0	0	1	TRUE	4
chr1	16082454	16082572	0	0	1	TRUE	6
chr1	16113831	16113949	0	0	1	TRUE	0
chr1	16367062	16368495	0	1	0	TRUE	11
chr1	16368565	16368789	0	1	0	TRUE	0
chr1	16490832	16490950	0	0	1	TRUE	0
chr1	16497773	16497891	0	0	1	FALSE	0
chr1	16498918	16499036	0	0	1	TRUE	6
chr1	16501612	16501730	0	0	1	TRUE	0
chr1	16503636	16503754	0	0	1	TRUE	0
chr1	16521038	16521156	0	0	1	TRUE	0
chr1	16535625	16535743	0	0	1	TRUE	0
chr1	16544511	16544629	0	0	1	TRUE	0
chr1	16601351	16601474	0	1	0	TRUE	0
chr1	16628380	16628681	0	1	0	TRUE	0
chr1	16628747	16628883	0	1	0	TRUE	0
chr1	16725105	16725376	0	1	0	TRUE	3
chr1	16888772	16889478	0	1	0	TRUE	5
chr1	16903048	16903399	0	1	0	TRUE	0
chr1	16903048	16903399	0	1	0	TRUE	0
chr1	16903624	16904008	0	1	0	TRUE	0
chr1	16921829	16921947	0	0	1	TRUE	3
chr1	16923176	16923294	0	0	1	TRUE	4
chr1	16925087	16925205	0	0	1	TRUE	4
chr1	16929072	16929190	0	0	1	TRUE	0
chr1	16930262	16930380	0	0	1	TRUE	0
chr1	16947640	16947758	0	0	1	TRUE	0
chr1	16948412	16948530	0	0	1	TRUE	3
chr1	16951634	16951926	0	0	1	TRUE	0
chr1	16959799	16959917	0	0	1	TRUE	4
chr1	16960681	16960799	0	0	1	TRUE	3
chr1	16963310	16963428	0	0	1	TRUE	5
chr1	16971535	16971653	0	0	1	TRUE	4
chr1	16986500	16986618	0	0	1	TRUE	5
chr1	17370720	17370838	0	0	1	TRUE	3
chr1	17371784	17371902	0	0	1	TRUE	0
chr1	17373099	17373217	0	0	1	TRUE	0
chr1	17401033	17401151	0	0	1	TRUE	6
chr1	17406286	17406404	0	0	1	TRUE	4
chr1	17419968	17420086	0	0	1	TRUE	4
chr1	17424138	17424256	0	0	1	TRUE	6
chr1	17427205	17427323	0	0	1	TRUE	3
chr1	17432332	17432450	0	0	1	TRUE	3
chr1	17460347	17460465	0	0	1	TRUE	4
chr1	17559329	17559618	0	1	0	TRUE	5
chr1	17559729	17560488	0	1	0	TRUE	4
chr1	17561112	17562061	0	1	0	TRUE	9
chr1	17601806	17601924	0	0	1	TRUE	4
chr1	17603359	17603477	0	0	1	TRUE	5
chr1	17606972	17607090	0	0	1	TRUE	4
chr1	17607742	17607860	0	0	1	TRUE	6
chr1	17608615	17608733	0	0	1	TRUE	0
chr1	17627533	17627651	0	0	1	TRUE	3
chr1	17629555	17629673	0	0	1	TRUE	4
chr1	17647009	17647127	0	0	1	TRUE	6
chr1	17653890	17654008	0	0	1	TRUE	3
chr1	17654692	17654842	0	1	0	TRUE	3
chr1	17661698	17661816	0	0	1	TRUE	5
chr1	17664312	17664430	0	0	1	TRUE	3
chr1	17667456	17667574	0	0	1	TRUE	4
chr1	17668828	17668946	0	0	1	TRUE	3
chr1	17672011	17672129	0	0	1	TRUE	3
chr1	18570044	18570162	0	0	1	TRUE	5
chr1	18575708	18575826	0	0	1	TRUE	5
chr1	18581557	18581675	0	0	1	TRUE	4
chr1	18584881	18584999	0	0	1	TRUE	4
chr1	18597269	18597648	0	0	1	TRUE	5
chr1	18608934	18609052	0	0	1	TRUE	0
chr1	18636481	18636599	0	0	1	TRUE	6
chr1	18845055	18845173	0	0	1	TRUE	3
chr1	18854840	18854958	0	0	1	TRUE	6
chr1	18865268	18865386	0	0	1	TRUE	5
chr1	18875346	18875464	0	0	1	TRUE	3
chr1	18884256	18884374	0	0	1	TRUE	4
chr1	18902931	18903049	0	0	1	TRUE	5
chr1	18907060	18907178	0	0	1	TRUE	3
chr1	18913155	18913273	0	0	1	TRUE	5
chr1	18918526	18918644	0	0	1	TRUE	5
chr1	19241374	19241492	0	0	1	TRUE	3
chr1	19268543	19268661	0	0	1	TRUE	0
chr1	19305989	19306107	0	0	1	TRUE	0
chr1	19312699	19312817	0	0	1	TRUE	5
chr1	19317675	19317793	0	0	1	TRUE	5
chr1	19391216	19391850	0	1	0	TRUE	3
chr1	19393006	19393692	0	1	0	TRUE	7
chr1	19414947	19415180	0	1	0	TRUE	3
chr1	19643084	19643511	1	0	1	TRUE	0
chr1	19643580	19644422	1	0	0	TRUE	3
chr1	19644621	19646015	1	0	0	TRUE	0
chr1	19647501	19647859	1	0	0	TRUE	0
chr1	19648785	19648903	0	0	1	TRUE	0
chr1	19651168	19651286	0	0	1	TRUE	4
chr1	19653812	19653930	0	0	1	TRUE	5
chr1	19659950	19660068	0	0	1	TRUE	4
chr1	19661867	19661985	0	0	1	TRUE	0
chr1	19665330	19665448	0	0	1	TRUE	6
chr1	19666238	19666356	0	0	1	TRUE	5
chr1	19675631	19675749	0	0	1	TRUE	3
chr1	19690393	19690511	0	0	1	TRUE	3
chr1	19695916	19696034	0	0	1	TRUE	4
chr1	19703340	19703458	0	0	1	TRUE	0
chr1	19704658	19704776	0	0	1	TRUE	4
chr1	19715726	19715844	0	0	1	TRUE	4
chr1	19798998	19799917	0	1	0	TRUE	8
chr1	19872283	19872401	0	0	1	TRUE	4
chr1	19882206	19882324	0	0	1	TRUE	7
chr1	19918127	19918245	0	0	1	TRUE	3
chr1	20151814	20152859	0	1	0	TRUE	7
chr1	20152957	20153519	0	1	0	TRUE	4
chr1	20154658	20155065	0	1	0	TRUE	0
chr1	20484180	20484298	0	0	1	TRUE	6
chr1	20487084	20487202	0	0	1	TRUE	5
chr1	20491959	20492077	0	0	1	TRUE	5
chr1	20493716	20494032	0	0	1	TRUE	4
chr1	20522450	20522568	0	0	1	TRUE	4
chr1	20654426	20654544	0	0	1	TRUE	5
chr1	20656246	20656364	0	0	1	TRUE	3
chr1	20661648	20661766	0	0	1	TRUE	6
chr1	20663540	20663658	0	0	1	TRUE	3
chr1	20670585	20670703	0	0	1	TRUE	4
chr1	20687872	20687990	0	0	1	TRUE	4
chr1	20696543	20696661	0	0	1	TRUE	5
chr1	20699576	20699694	0	0	1	TRUE	0
chr1	20700403	20700521	0	0	1	TRUE	0
chr1	20702564	20702682	0	0	1	TRUE	0
chr1	20711867	20711985	0	0	1	TRUE	5
chr1	21114938	21115166	0	1	0	TRUE	0
chr1	21195297	21195415	0	0	1	TRUE	0
chr1	21210444	21210562	0	0	1	FALSE	0
chr1	21216989	21217107	0	0	1	TRUE	4
chr1	21232093	21232211	0	0	1	TRUE	4
chr1	21398476	21398750	0	1	0	TRUE	3
chr1	21435876	21436298	0	1	0	TRUE	3
chr1	21436384	21437389	0	1	0	TRUE	7
chr1	21445436	21445626	0	1	0	TRUE	0
chr1	21605070	21605188	0	0	1	TRUE	0
chr1	21609910	21610028	0	0	1	TRUE	5
chr1	21618937	21619055	0	0	1	TRUE	4
chr1	21638760	21638878	0	0	1	TRUE	0
chr1	21655849	21655967	0	0	1	TRUE	3
chr1	21657913	21658031	0	0	1	TRUE	3
chr1	21659211	21659329	0	0	1	TRUE	3
chr1	21663680	21663798	0	0	1	TRUE	4
chr1	21666034	21666431	0	1	0	TRUE	3
chr1	21668608	21668726	0	0	1	TRUE	4
chr1	21669952	21670070	0	0	1	TRUE	6
chr1	21703440	21703558	0	0	1	TRUE	3
chr1	21898729	21899167	1	0	0	TRUE	0
chr1	21936982	21938047	1	0	0	TRUE	0
chr1	21964102	21964220	0	0	1	TRUE	0
chr1	22024228	22024346	0	0	1	TRUE	5
chr1	22053417	22053535	0	0	1	TRUE	5
chr1	22121377	22121654	0	1	0	TRUE	5
chr1	22140730	22141055	0	1	0	TRUE	0
chr1	22141610	22143026	0	1	0	TRUE	13
chr1	22415649	22415767	0	0	1	TRUE	4
chr1	22416710	22416828	0	0	1	TRUE	4
chr1	22420570	22420688	0	0	1	TRUE	4
chr1	22422230	22422348	0	0	1	TRUE	4
chr1	22451817	22451935	0	0	1	TRUE	7
chr1	22452107	22452225	0	0	1	TRUE	7
chr1	22457453	22457571	0	0	1	TRUE	0
chr1	22621809	22621927	0	0	1	TRUE	3
chr1	22625382	22625500	0	0	1	TRUE	0
chr1	22631703	22631821	0	0	1	TRUE	0
chr1	22636971	22637089	0	0	1	TRUE	4
chr1	22637701	22637819	0	0	1	TRUE	7
chr1	22639210	22639328	0	0	1	TRUE	3
chr1	22642148	22642266	0	0	1	TRUE	4
chr1	22650432	22650550	0	0	1	TRUE	0
chr1	22654716	22654834	0	0	1	TRUE	4
chr1	22665887	22666005	0	0	1	TRUE	4
chr1	22674270	22674388	0	0	1	TRUE	3
chr1	22698685	22698803	0	0	1	TRUE	4
chr1	22702702	22703328	0	1	0	TRUE	4
chr1	22704368	22704689	0	0	1	TRUE	3
chr1	22709380	22709498	0	0	1	TRUE	4
chr1	22710837	22713199	0	0	1	TRUE	22
chr1	22930445	22930563	0	0	1	TRUE	4
chr1	22964322	22964440	0	0	1	TRUE	3
chr1	22976545	22976663	0	0	1	TRUE	4
chr1	23018717	23020063	1	0	0	TRUE	0
chr1	23169858	23170244	0	1	0	TRUE	0
chr1	23645625	23646483	0	1	0	TRUE	4
chr1	23745167	23745285	0	0	1	TRUE	0
chr1	23751430	23751548	0	0	1	TRUE	5
chr1	23772253	23772371	0	0	1	TRUE	4
chr1	23778442	23778560	0	0	1	TRUE	7
chr1	23790866	23790984	0	0	1	TRUE	5
chr1	23791764	23791882	0	0	1	TRUE	6
chr1	23796884	23797002	0	0	1	TRUE	5
chr1	23798669	23798787	0	0	1	TRUE	4
chr1	23799330	23801554	1	0	1	TRUE	5
chr1	23949272	23949390	0	0	1	TRUE	0
chr1	23959242	23959360	0	0	1	TRUE	6
chr1	23980065	23980183	0	0	1	TRUE	7
chr1	24632779	24632897	0	0	1	TRUE	4
chr1	24635360	24635478	0	0	1	TRUE	0
chr1	24693826	24693957	0	1	0	TRUE	3
chr1	24830821	24830939	0	0	1	TRUE	4
chr1	24835056	24835174	0	0	1	TRUE	0
chr1	24848037	24848155	0	0	1	TRUE	5
chr1	24849822	24849940	0	0	1	TRUE	0
chr1	24857809	24857927	0	0	1	TRUE	4
chr1	24862185	24862303	0	0	1	TRUE	5
chr1	24866341	24866459	0	0	1	TRUE	0
chr1	24886638	24886756	0	0	1	TRUE	4
chr1	24887998	24888116	0	0	1	TRUE	3
chr1	24898229	24898347	0	0	1	TRUE	5
chr1	24909581	24909853	0	0	1	TRUE	4
chr1	24931301	24931547	0	1	0	TRUE	5
chr1	25166953	25167725	0	1	0	TRUE	5
chr1	25168708	25169197	0	1	0	TRUE	0
chr1	25204982	25205100	0	0	1	TRUE	0
chr1	25217742	25217860	0	0	1	TRUE	4
chr1	25226265	25226383	0	0	1	TRUE	0
chr1	25233186	25233304	0	0	1	TRUE	0
chr1	25239856	25239974	0	0	1	TRUE	4
chr1	25246447	25246565	0	0	1	TRUE	4
chr1	25247863	25247981	0	0	1	TRUE	3
chr1	25523662	25523780	0	0	1	TRUE	5
chr1	25541978	25542193	0	0	1	TRUE	5
chr1	25543387	25543505	0	0	1	TRUE	6
chr1	25543924	25544042	0	0	1	TRUE	5
chr1	25549828	25549946	0	0	1	TRUE	3
chr1	25556586	25556704	0	0	1	TRUE	5
chr1	25566721	25566839	0	0	1	TRUE	6
chr1	25568394	25568512	0	0	1	TRUE	4
chr1	25571148	25571266	0	0	1	TRUE	5
chr1	25572543	25572661	0	0	1	TRUE	3
chr1	25584444	25584562	0	0	1	TRUE	4
chr1	25590298	25590416	0	0	1	TRUE	4
chr1	25791949	25792092	0	1	0	TRUE	3
chr1	25803083	25803201	0	0	1	TRUE	0
chr1	25804381	25804499	0	0	1	TRUE	3
chr1	25805382	25805500	0	0	1	TRUE	4
chr1	25810920	25811038	0	0	1	TRUE	5
chr1	25814183	25814301	0	0	1	TRUE	5
chr1	25818236	25818354	0	0	1	TRUE	3
chr1	25819781	25819899	0	0	1	TRUE	5
chr1	25820662	25820780	0	0	1	TRUE	4
chr1	25825675	25825793	0	0	1	TRUE	0
chr1	25837404	25837522	0	0	1	TRUE	0
chr1	25859278	25859396	0	0	1	TRUE	5
chr1	25863546	25863664	0	0	1	TRUE	5
chr1	25875209	25875327	0	0	1	TRUE	5
chr1	25889617	25889735	0	0	1	TRUE	4
chr1	25895524	25895642	0	0	1	TRUE	4
chr1	25905892	25906010	0	0	1	TRUE	6
chr1	25906491	25906609	0	0	1	TRUE	5
chr1	26010263	26010381	0	0	1	TRUE	0
chr1	26017425	26017543	0	0	1	TRUE	4
chr1	26036077	26036195	0	0	1	TRUE	4
chr1	26045914	26046032	0	0	1	TRUE	6
chr1	26070659	26070777	0	0	1	TRUE	3
chr1	26161256	26162467	0	1	0	TRUE	10
chr1	26305734	26306704	0	1	0	TRUE	10
chr1	26345853	26346182	0	1	0	TRUE	6
chr1	26468012	26468130	0	0	1	TRUE	3
chr1	26470430	26470548	0	0	1	TRUE	0
chr1	26472047	26472165	0	0	1	TRUE	5
chr1	26472410	26473409	0	0	1	TRUE	10
chr1	26500028	26501818	0	0	1	TRUE	20
chr1	26619719	26621992	0	1	0	TRUE	19
chr1	26696030	26696536	0	1	0	TRUE	5
chr1	26696641	26697464	0	1	0	TRUE	7
chr1	26697513	26697719	0	1	0	TRUE	4
chr1	26698015	26698762	0	1	0	TRUE	3
chr1	26788187	26788556	0	1	0	TRUE	6
chr1	26788654	26789422	0	1	0	TRUE	9
chr1	26862391	26862438	1	0	0	TRUE	0
chr1	26862744	26863391	1	0	0	TRUE	0
chr1	26887247	26887365	0	0	1	TRUE	3
chr1	26914515	26914633	0	0	1	TRUE	3
chr1	26946974	26947092	0	0	1	TRUE	0
chr1	26967028	26967146	0	0	1	TRUE	4
chr1	26993717	26993835	0	0	1	TRUE	6
chr1	26995286	26995404	0	0	1	TRUE	4
chr1	26997755	26997873	0	0	1	TRUE	4
chr1	26999698	26999816	0	0	1	TRUE	4
chr1	27031197	27032269	0	1	0	TRUE	8
chr1	27033200	27033749	0	1	0	TRUE	5
chr1	27152688	27152935	0	1	0	TRUE	0
chr1	27153198	27153775	0	1	0	TRUE	5
chr1	27154484	27155130	0	1	0	TRUE	6
chr1	27203355	27203568	0	1	0	TRUE	4
chr1	27233765	27235447	1	0	0	TRUE	5
chr1	27284798	27284916	0	0	1	TRUE	3
chr1	27292228	27292346	0	0	1	TRUE	4
chr1	27296812	27296930	0	0	1	TRUE	4
chr1	27300917	27301035	0	0	1	TRUE	5
chr1	27303582	27303700	0	0	1	TRUE	3
chr1	27306908	27307026	0	0	1	TRUE	4
chr1	27308101	27308219	0	0	1	TRUE	4
chr1	27322139	27322257	0	0	1	TRUE	6
chr1	27332902	27333020	0	0	1	TRUE	5
chr1	27339380	27339498	0	0	1	TRUE	4
chr1	27341429	27341547	0	0	1	TRUE	6
chr1	27342354	27342472	0	0	1	TRUE	3
chr1	27342499	27342617	0	0	1	TRUE	2
chr1	27349742	27349860	0	0	1	TRUE	6
chr1	27349948	27350066	0	0	1	TRUE	5
chr1	27350882	27351000	0	0	1	TRUE	6
chr1	27351412	27351530	0	0	1	TRUE	6
chr1	27356548	27356666	0	0	1	TRUE	6
chr1	27357627	27357745	0	0	1	TRUE	6
chr1	27359773	27359891	0	0	1	TRUE	3
chr1	27360690	27360808	0	0	1	TRUE	5
chr1	27519110	27520011	0	1	0	TRUE	7
chr1	27520726	27521020	0	1	0	TRUE	3
chr1	27521278	27521822	0	1	0	TRUE	4
chr1	27521837	27522947	0	1	0	TRUE	11
chr1	27523008	27523471	0	1	0	TRUE	4
chr1	27584569	27584804	0	1	0	TRUE	5
chr1	27686361	27686479	0	0	1	TRUE	3
chr1	27725703	27725821	0	0	1	TRUE	7
chr1	27744705	27744823	0	0	1	TRUE	3
chr1	27760533	27760651	0	0	1	TRUE	0
chr1	27830776	27830894	0	0	1	TRUE	5
chr1	27943676	27943954	0	1	0	FALSE	0
chr1	28208994	28209112	0	0	1	TRUE	4
chr1	28248595	28248713	0	0	1	TRUE	0
chr1	28259330	28259448	0	0	1	TRUE	6
chr1	28273322	28273440	0	0	1	TRUE	5
chr1	28273631	28273884	0	1	0	TRUE	7
chr1	28369581	28370785	0	1	0	TRUE	15
chr1	28602966	28603084	0	0	1	TRUE	3
chr1	28643129	28643247	0	0	1	TRUE	4
chr1	28653994	28654112	0	0	1	TRUE	0
chr1	28654590	28654708	0	0	1	TRUE	0
chr1	28668687	28670061	0	0	1	TRUE	15
chr1	28881985	28882185	0	1	0	TRUE	0
chr1	29176616	29176734	0	0	1	TRUE	0
chr1	29181555	29181673	0	0	1	TRUE	6
chr1	29197650	29197768	0	0	1	TRUE	4
chr1	29202988	29203106	0	0	1	TRUE	3
chr1	29230991	29231109	0	0	1	TRUE	3
chr1	29240403	29240521	0	0	1	TRUE	5
chr1	29280897	29281169	0	1	0	TRUE	3
chr1	30679164	30679282	0	0	1	TRUE	0
chr1	30685248	30685366	0	0	1	TRUE	5
chr1	30698168	30698286	0	0	1	TRUE	0
chr1	30708232	30708350	0	0	1	TRUE	3
chr1	30711668	30711786	0	0	1	TRUE	4
chr1	30715351	30715469	0	0	1	TRUE	3
chr1	30719340	30719458	0	0	1	TRUE	7
chr1	30722016	30722134	0	0	1	TRUE	3
chr1	30724318	30724436	0	0	1	TRUE	4
chr1	30732678	30732796	0	0	1	TRUE	5
chr1	30737900	30738018	0	0	1	TRUE	6
chr1	30744016	30744134	0	0	1	TRUE	0
chr1	30747742	30747860	0	0	1	TRUE	4
chr1	30752152	30752270	0	0	1	TRUE	4
chr1	30871446	30871711	0	1	0	TRUE	4
chr1	30929527	30929645	0	0	1	TRUE	4
chr1	30983134	30983252	0	0	1	TRUE	0
chr1	30984329	30984447	0	0	1	TRUE	0
chr1	31155415	31155533	0	0	1	TRUE	6
chr1	31162797	31162915	0	0	1	TRUE	0
chr1	31170975	31171093	0	0	1	TRUE	3
chr1	31182592	31182710	0	0	1	TRUE	4
chr1	31184091	31184209	0	0	1	TRUE	3
chr1	31185795	31185913	0	0	1	TRUE	0
chr1	31191662	31191780	0	0	1	TRUE	0
chr1	31436796	31437054	0	1	0	TRUE	0
chr1	31444542	31444842	0	1	0	TRUE	3
chr1	31618254	31618372	0	0	1	TRUE	6
chr1	31619504	31619622	0	0	1	TRUE	4
chr1	31633256	31633374	0	0	1	TRUE	4
chr1	31635363	31635481	0	0	1	TRUE	3
chr1	31640328	31640446	0	0	1	TRUE	0
chr1	31644130	31644617	0	1	0	TRUE	6
chr1	31663961	31664079	0	0	1	TRUE	4
chr1	31666225	31666343	0	0	1	TRUE	4
chr1	31670196	31670314	0	0	1	TRUE	6
chr1	31679955	31680073	0	0	1	TRUE	7
chr1	31681648	31681766	0	0	1	TRUE	4
chr1	31780799	31781104	0	1	0	TRUE	0
chr1	31788001	31789771	0	1	0	TRUE	18
chr1	32063524	32063642	0	0	1	TRUE	3
chr1	32072794	32073731	0	0	1	TRUE	9
chr1	32104329	32104447	0	0	1	TRUE	4
chr1	32109454	32109572	0	0	1	TRUE	0
chr1	32179995	32180113	0	0	1	TRUE	7
chr1	32201042	32201160	0	0	1	TRUE	6
chr1	32215742	32215860	0	0	1	TRUE	4
chr1	32223869	32223987	0	0	1	TRUE	0
chr1	32228929	32229047	0	0	1	TRUE	4
chr1	32235044	32235162	0	0	1	TRUE	3
chr1	32239472	32239590	0	0	1	TRUE	4
chr1	32240322	32240440	0	0	1	TRUE	5
chr1	32241250	32241368	0	0	1	TRUE	6
chr1	32292106	32293021	0	1	0	TRUE	7
chr1	32335250	32335368	0	0	1	TRUE	5
chr1	32336299	32336417	0	0	1	TRUE	6
chr1	32337957	32338075	0	0	1	TRUE	4
chr1	32351280	32351398	0	0	1	TRUE	6
chr1	32352152	32352270	0	0	1	TRUE	5
chr1	32357280	32357398	0	0	1	TRUE	3
chr1	32361601	32361719	0	0	1	TRUE	5
chr1	32362105	32362223	0	0	1	TRUE	6
chr1	32390997	32391115	0	0	1	TRUE	3
chr1	32394416	32394534	0	0	1	TRUE	6
chr1	32400950	32401068	0	0	1	TRUE	6
chr1	32411001	32411119	0	0	1	FALSE	0
chr1	32414080	32414198	0	0	1	TRUE	0
chr1	32781054	32781156	0	1	0	TRUE	4
chr1	32872756	32872874	0	0	1	TRUE	4
chr1	32876765	32876883	0	0	1	TRUE	4
chr1	32886684	32886802	0	0	1	TRUE	5
chr1	32892980	32893098	0	0	1	TRUE	4
chr1	32901078	32901196	0	0	1	TRUE	6
chr1	33055255	33055373	0	0	1	TRUE	3
chr1	33080997	33081115	0	0	1	TRUE	7
chr1	33086480	33086598	0	0	1	TRUE	4
chr1	33095131	33095249	0	0	1	TRUE	4
chr1	33099300	33099418	0	0	1	TRUE	3
chr1	33112111	33112229	0	0	1	TRUE	0
chr1	33119872	33119990	0	0	1	TRUE	5
chr1	33272256	33272372	0	1	0	TRUE	7
chr1	33349252	33350648	1	0	0	TRUE	0
chr1	33375441	33375668	1	1	0	TRUE	0
chr1	33392610	33393141	1	0	0	TRUE	0
chr1	33430360	33431547	1	0	0	TRUE	0
chr1	33455950	33456068	0	0	1	TRUE	4
chr1	33462773	33462891	0	0	1	TRUE	3
chr1	33470604	33470722	0	0	1	TRUE	0
chr1	33472384	33472502	0	0	1	TRUE	6
chr1	33500663	33500781	0	0	1	TRUE	3
chr1	33501966	33502084	0	0	1	TRUE	0
chr1	33971586	33971731	0	1	0	TRUE	4
chr1	34129663	34129781	0	0	1	TRUE	0
chr1	34156867	34156985	0	0	1	TRUE	3
chr1	34163695	34163813	0	0	1	TRUE	5
chr1	34165258	34165376	0	0	1	TRUE	4
chr1	34177368	34177486	0	0	1	TRUE	3
chr1	34742798	34742916	0	0	1	TRUE	3
chr1	34753169	34753287	0	0	1	TRUE	0
chr1	34760042	34760160	0	0	1	TRUE	5
chr1	34775112	34775230	0	0	1	TRUE	4
chr1	34780639	34780848	1	0	0	TRUE	0
chr1	34780967	34781438	1	0	0	TRUE	0
chr1	34781559	34782459	1	0	1	TRUE	0
chr1	34786576	34786694	0	0	1	TRUE	4
chr1	34788245	34788363	0	0	1	TRUE	4
chr1	34797247	34797365	0	0	1	TRUE	4
chr1	34825586	34825704	0	0	1	TRUE	6
chr1	34843495	34843613	0	0	1	TRUE	3
chr1	34852719	34852837	0	0	1	TRUE	3
chr1	34859844	34859962	0	0	1	TRUE	4
chr1	34866467	34866585	0	0	1	TRUE	6
chr1	34879363	34879481	0	0	1	TRUE	0
chr1	34983746	34985347	0	1	0	TRUE	14
chr1	35112797	35112915	0	0	1	TRUE	0
chr1	35160225	35160343	0	0	1	TRUE	0
chr1	35191588	35193827	1	1	0	TRUE	0
chr1	35268966	35269812	0	1	0	TRUE	7
chr1	35545159	35545277	0	0	1	TRUE	0
chr1	35557199	35557317	0	0	1	TRUE	8
chr1	35557628	35557746	0	0	1	TRUE	7
chr1	35558338	35558456	0	0	1	TRUE	5
chr1	35564763	35564881	0	0	1	TRUE	4
chr1	35569054	35569172	0	0	1	TRUE	3
chr1	35577250	35577368	0	0	1	TRUE	7
chr1	35577718	35577836	0	0	1	TRUE	6
chr1	35717755	35719189	0	1	0	TRUE	12
chr1	35769998	35770116	0	0	1	TRUE	6
chr1	35774799	35774917	0	0	1	TRUE	0
chr1	35808213	35809491	0	0	1	TRUE	10
chr1	35883194	35884394	0	1	0	TRUE	14
chr1	36082283	36082401	0	0	1	TRUE	4
chr1	36083992	36084110	0	0	1	TRUE	5
chr1	36084805	36084923	0	0	1	TRUE	4
chr1	36087314	36087432	0	0	1	TRUE	5
chr1	36087881	36087999	0	0	1	TRUE	4
chr1	36088731	36088849	0	0	1	TRUE	6
chr1	36096724	36096842	0	0	1	TRUE	4
chr1	36097231	36097349	0	0	1	TRUE	5
chr1	36099722	36099840	0	0	1	TRUE	4
chr1	36148931	36149514	0	1	0	TRUE	6
chr1	36173050	36173240	0	1	0	TRUE	5
chr1	36446459	36446577	0	0	1	TRUE	3
chr1	36464135	36464253	0	0	1	TRUE	5
chr1	36472056	36472174	0	0	1	TRUE	5
chr1	36474224	36474342	0	0	1	TRUE	3
chr1	36475992	36476110	0	0	1	TRUE	3
chr1	36485810	36485928	0	0	1	TRUE	4
chr1	36490189	36490307	0	0	1	TRUE	0
chr1	36516473	36516591	0	0	1	TRUE	3
chr1	37448168	37448286	0	0	1	TRUE	4
chr1	37449409	37449527	0	0	1	TRUE	0
chr1	37454961	37455079	0	0	1	TRUE	3
chr1	37458684	37458802	0	0	1	TRUE	3
chr1	37474217	37474335	0	0	1	TRUE	8
chr1	37474664	37474782	0	0	1	TRUE	6
chr1	37475713	37475831	0	0	1	TRUE	5
chr1	37477254	37477372	0	0	1	TRUE	3
chr1	37478479	37478597	0	0	1	TRUE	4
chr1	37479377	37479495	0	0	1	TRUE	4
chr1	37480268	37480386	0	0	1	TRUE	3
chr1	37487495	37487613	0	0	1	TRUE	0
chr1	37514006	37514124	0	0	1	TRUE	6
chr1	37765183	37765301	0	0	1	TRUE	7
chr1	37778780	37778898	0	0	1	TRUE	0
chr1	37793800	37793918	0	0	1	TRUE	6
chr1	37794134	37794252	0	0	1	TRUE	6
chr1	37794942	37795060	0	0	1	TRUE	5
chr1	37807738	37807856	0	0	1	TRUE	6
chr1	37808665	37808783	0	0	1	TRUE	5
chr1	37810866	37810984	0	0	1	TRUE	0
chr1	37817790	37817908	0	0	1	TRUE	3
chr1	37820022	37820140	0	0	1	TRUE	0
chr1	38587181	38587299	0	0	1	TRUE	4
chr1	38608392	38608510	0	0	1	TRUE	4
chr1	38615839	38615957	0	0	1	TRUE	0
chr1	38623724	38623842	0	0	1	TRUE	3
chr1	38626089	38626207	0	0	1	TRUE	4
chr1	38804183	38804394	0	1	0	TRUE	4
chr1	38835368	38835486	0	0	1	TRUE	3
chr1	38846331	38846449	0	0	1	TRUE	0
chr1	38859080	38859198	0	0	1	TRUE	4
chr1	38859969	38860087	0	0	1	TRUE	6
chr1	38873324	38873442	0	0	1	TRUE	8
chr1	39081787	39081905	0	0	1	TRUE	5
chr1	39088815	39088933	0	0	1	TRUE	4
chr1	39092485	39092603	0	0	1	TRUE	0
chr1	39098772	39098890	0	0	1	TRUE	0
chr1	39102519	39104115	0	0	1	TRUE	10
chr1	39104556	39106829	1	1	0	TRUE	4
chr1	39106866	39107675	0	0	1	TRUE	5
chr1	39107889	39108287	0	1	0	TRUE	3
chr1	39204320	39204551	1	0	0	TRUE	0
chr1	39213495	39215492	1	0	0	TRUE	0
chr1	39230269	39231164	1	0	0	TRUE	0
chr1	39268077	39268714	1	0	0	TRUE	0
chr1	39328065	39328625	1	0	0	TRUE	0
chr1	39328729	39328852	1	0	0	TRUE	0
chr1	39525710	39525828	0	0	1	TRUE	4
chr1	39539328	39539446	0	0	1	TRUE	0
chr1	39576902	39577020	0	0	1	TRUE	4
chr1	39786772	39786890	0	0	1	TRUE	0
chr1	39787638	39787808	0	1	0	TRUE	0
chr1	39789198	39789316	0	0	1	TRUE	6
chr1	39799782	39799900	0	0	1	TRUE	5
chr1	40032414	40032532	0	0	1	TRUE	3
chr1	40033108	40033226	0	0	1	TRUE	0
chr1	40039162	40039280	0	0	1	TRUE	0
chr1	40040797	40040915	0	0	1	TRUE	9
chr1	40059341	40059459	0	0	1	TRUE	0
chr1	40078650	40078768	0	0	1	TRUE	0
chr1	40532964	40533082	0	0	1	TRUE	0
chr1	40692007	40692261	0	1	0	TRUE	9
chr1	40780930	40781105	0	1	0	TRUE	5
chr1	40824584	40824741	0	1	0	TRUE	5
chr1	40979298	40981113	0	1	0	TRUE	19
chr1	40998018	40998136	0	0	1	TRUE	4
chr1	41003876	41003994	0	0	1	TRUE	4
chr1	41019463	41019581	0	0	1	TRUE	3
chr1	41022079	41022197	0	0	1	TRUE	3
chr1	41023378	41023496	0	0	1	TRUE	0
chr1	41025147	41025265	0	0	1	TRUE	3
chr1	41038234	41038352	0	0	1	TRUE	0
chr1	41240824	41242143	0	1	0	TRUE	12
chr1	41431872	41432224	0	1	0	TRUE	5
chr1	41432358	41433474	0	1	0	TRUE	9
chr1	41444382	41444500	0	0	1	TRUE	4
chr1	41468133	41468251	0	0	1	TRUE	3
chr1	41469187	41469305	0	0	1	TRUE	4
chr1	41473812	41473930	0	0	1	TRUE	4
chr1	41476304	41476422	0	0	1	TRUE	0
chr1	41483875	41483993	0	0	1	TRUE	3
chr1	41484387	41484505	0	0	1	TRUE	3
chr1	41492402	41492520	0	0	1	TRUE	3
chr1	41496250	41496368	0	0	1	TRUE	5
chr1	41499009	41499127	0	0	1	TRUE	4
chr1	41501263	41501381	0	0	1	TRUE	5
chr1	41503910	41504028	0	0	1	TRUE	5
chr1	41507177	41507295	0	0	1	TRUE	4
chr1	41513514	41513632	0	0	1	TRUE	4
chr1	41516211	41516329	0	0	1	TRUE	3
chr1	41830525	41830651	0	1	0	TRUE	3
chr1	41849346	41849548	0	1	0	TRUE	3
chr1	41889954	41890148	0	1	0	TRUE	0
chr1	41890605	41892228	0	1	0	TRUE	12
chr1	42144778	42144896	0	0	1	TRUE	4
chr1	42146981	42147099	0	0	1	TRUE	4
chr1	42173449	42173567	0	0	1	TRUE	5
chr1	42175781	42175899	0	0	1	TRUE	0
chr1	42177055	42177173	0	0	1	TRUE	0
chr1	42380796	42381316	0	1	0	TRUE	7
chr1	42730166	42730284	0	0	1	TRUE	0
chr1	42731192	42731310	0	0	1	TRUE	3
chr1	42736384	42736502	0	0	1	TRUE	4
chr1	42737385	42737503	0	0	1	TRUE	0
chr1	42747271	42747389	0	0	1	TRUE	3
chr1	42757100	42757218	0	0	1	TRUE	3
chr1	42759268	42759386	0	0	1	TRUE	5
chr1	42767317	42767435	0	0	1	TRUE	6
chr1	42929438	42929971	0	1	0	TRUE	4
chr1	42930893	42932688	0	1	0	TRUE	10
chr1	42930893	42932688	0	1	0	TRUE	10
chr1	42958926	42959607	1	0	0	TRUE	0
chr1	42979970	42980507	0	1	0	TRUE	0
chr1	43143737	43143855	0	0	1	TRUE	0
chr1	43225241	43225359	0	0	1	TRUE	4
chr1	43227384	43227502	0	0	1	TRUE	3
chr1	43235636	43235754	0	0	1	TRUE	0
chr1	43236062	43236180	0	0	1	TRUE	0
chr1	43238219	43238337	0	0	1	TRUE	3
chr1	43292346	43292636	0	1	0	TRUE	0
chr1	43358204	43359204	1	0	0	TRUE	0
chr1	43452708	43453989	0	1	0	TRUE	12
chr1	43704837	43704955	0	0	1	TRUE	3
chr1	43872107	43872387	0	1	0	TRUE	3
chr1	43946805	43948270	0	1	0	TRUE	15
chr1	43969994	43970379	0	1	0	TRUE	5
chr1	43974242	43974360	0	0	1	TRUE	5
chr1	43974647	43976000	0	0	1	TRUE	13
chr1	43976242	43976360	0	0	1	TRUE	4
chr1	43986767	43986992	0	0	1	TRUE	4
chr1	43990892	43991010	0	0	1	TRUE	5
chr1	43991487	43991605	0	0	1	TRUE	8
chr1	43991620	43991738	0	0	1	TRUE	8
chr1	43994915	43995033	0	0	1	TRUE	4
chr1	44002597	44002715	0	0	1	TRUE	3
chr1	44005772	44005890	0	0	1	TRUE	0
chr1	44011004	44011122	0	0	1	TRUE	3
chr1	44015827	44015945	0	0	1	TRUE	3
chr1	44036694	44036812	0	0	1	TRUE	3
chr1	44047809	44047927	0	0	1	TRUE	0
chr1	44421588	44421795	0	1	0	TRUE	0
chr1	44631202	44633189	0	1	0	TRUE	18
chr1	44708013	44708131	0	0	1	TRUE	0
chr1	44715096	44715214	0	0	1	TRUE	0
chr1	44729389	44729507	0	0	1	TRUE	3
chr1	44731406	44731524	0	0	1	TRUE	0
chr1	44739152	44740067	1	0	0	TRUE	3
chr1	44746226	44746505	1	0	0	TRUE	0
chr1	44748034	44748152	0	0	1	TRUE	3
chr1	44819118	44820898	0	1	0	TRUE	10
chr1	45134678	45134986	0	1	0	TRUE	0
chr1	45569658	45569868	0	1	0	TRUE	4
chr1	45570184	45570302	0	0	1	TRUE	3
chr1	45573465	45573583	0	0	1	TRUE	0
chr1	45584459	45584577	0	0	1	TRUE	5
chr1	45750026	45750813	0	1	0	TRUE	9
chr1	46003418	46003705	0	1	0	TRUE	0
chr1	46171178	46172326	0	1	0	TRUE	10
chr1	46172367	46172694	0	1	0	TRUE	1
chr1	46173186	46174076	0	1	0	TRUE	6
chr1	46223673	46223876	0	1	0	TRUE	4
chr1	46300735	46300964	0	1	0	TRUE	0
chr1	46301169	46302612	0	1	0	TRUE	15
chr1	46308547	46308902	0	1	0	TRUE	3
chr1	46333624	46333742	0	0	1	TRUE	4
chr1	46339533	46339651	0	0	1	TRUE	4
chr1	46340874	46340992	0	0	1	TRUE	4
chr1	46342179	46342297	0	0	1	TRUE	5
chr1	46346910	46347028	0	0	1	TRUE	5
chr1	46348216	46348334	0	0	1	TRUE	3
chr1	46349414	46349532	0	0	1	TRUE	0
chr1	46372567	46372685	0	0	1	TRUE	0
chr1	46406461	46406579	0	0	1	TRUE	0
chr1	46412113	46412231	0	0	1	TRUE	5
chr1	46413730	46413848	0	0	1	TRUE	4
chr1	46431650	46431768	0	0	1	TRUE	4
chr1	46437726	46437844	0	0	1	TRUE	3
chr1	46719227	46719345	0	0	1	TRUE	4
chr1	46725369	46725487	0	0	1	TRUE	4
chr1	46747828	46747946	0	0	1	TRUE	0
chr1	46757860	46757978	0	0	1	TRUE	5
chr1	47313897	47314932	1	0	0	TRUE	0
chr1	47333612	47333730	0	0	1	TRUE	6
chr1	47339552	47339670	0	0	1	TRUE	0
chr1	47379768	47379886	0	0	1	TRUE	0
chr1	47388890	47389227	0	0	1	TRUE	3
chr1	47438317	47438585	0	1	0	TRUE	4
chr1	47438610	47438894	0	1	0	TRUE	4
chr1	47439070	47439440	0	1	0	TRUE	5
chr1	47507760	47509476	0	1	0	TRUE	14
chr1	47650417	47650839	0	1	0	TRUE	3
chr1	47651323	47651693	0	1	0	TRUE	4
chr1	47704381	47704499	0	0	1	TRUE	3
chr1	47710613	47710731	0	0	1	TRUE	5
chr1	47725108	47725226	0	0	1	TRUE	4
chr1	47726385	47726503	0	0	1	TRUE	0
chr1	47738721	47738839	0	0	1	TRUE	0
chr1	47743067	47743185	0	0	1	TRUE	0
chr1	47755552	47755670	0	0	1	TRUE	0
chr1	47756112	47756230	0	0	1	TRUE	5
chr1	47759931	47760049	0	0	1	TRUE	6
chr1	47765186	47765454	0	1	0	TRUE	4
chr1	47930371	47930489	0	0	1	TRUE	0
chr1	47931587	47931705	0	0	1	TRUE	3
chr1	47934432	47934550	0	0	1	TRUE	4
chr1	47948216	47948334	0	0	1	TRUE	0
chr1	47951970	47952088	0	0	1	TRUE	4
chr1	48052895	48053013	0	0	1	TRUE	0
chr1	48061311	48061429	0	0	1	TRUE	3
chr1	48062416	48062636	0	1	0	TRUE	4
chr1	48070813	48070931	0	0	1	TRUE	3
chr1	48093807	48093925	0	0	1	TRUE	5
chr1	48105310	48105428	0	0	1	TRUE	3
chr1	48109533	48109651	0	0	1	TRUE	4
chr1	48202293	48202411	0	0	1	TRUE	4
chr1	48217058	48217176	0	0	1	TRUE	6
chr1	48220632	48220750	0	0	1	TRUE	0
chr1	48228481	48228599	0	0	1	TRUE	3
chr1	48236986	48237104	0	0	1	TRUE	3
chr1	48498217	48498335	0	0	1	TRUE	0
chr1	48530864	48530982	0	0	1	TRUE	4
chr1	48552554	48552672	0	0	1	TRUE	0
chr1	50329698	50329816	0	0	1	TRUE	3
chr1	50333685	50333803	0	0	1	TRUE	4
chr1	50348829	50348947	0	0	1	TRUE	5
chr1	50368573	50368691	0	0	1	TRUE	5
chr1	50369968	50370086	0	0	1	TRUE	4
chr1	50735507	50735625	0	0	1	TRUE	0
chr1	50750108	50750226	0	0	1	TRUE	0
chr1	50774899	50775017	0	0	1	TRUE	0
chr1	50959103	50959285	0	1	0	TRUE	4
chr1	51236272	51237417	0	1	0	TRUE	13
chr1	51287882	51288000	0	0	1	TRUE	4
chr1	51296927	51297045	0	0	1	TRUE	4
chr1	51297711	51298135	1	0	0	TRUE	0
chr1	51299367	51299485	0	0	1	TRUE	3
chr1	51307026	51307304	0	1	0	TRUE	3
chr1	51311037	51311155	0	0	1	TRUE	4
chr1	51313529	51313647	0	0	1	TRUE	5
chr1	51314559	51314677	0	0	1	TRUE	4
chr1	51316133	51316251	0	0	1	TRUE	5
chr1	51322013	51322353	1	0	0	TRUE	0
chr1	51325682	51326210	1	0	0	TRUE	0
chr1	51326242	51326703	1	0	0	TRUE	0
chr1	51329947	51331028	1	0	0	TRUE	4
chr1	51331172	51332209	1	0	0	TRUE	0
chr1	51344866	51345763	1	0	0	TRUE	0
chr1	51769108	51769226	0	0	1	TRUE	0
chr1	51785383	51785501	0	0	1	TRUE	5
chr1	51792942	51793060	0	0	1	TRUE	3
chr1	51970208	51970318	0	1	0	TRUE	4
chr1	52142093	52143120	0	1	0	TRUE	9
chr1	52348781	52348899	0	0	1	TRUE	4
chr1	52364372	52364490	0	0	1	TRUE	5
chr1	52364994	52366320	0	0	1	TRUE	12
chr1	52368438	52368556	0	0	1	TRUE	1
chr1	52368659	52368777	0	0	1	TRUE	3
chr1	52666462	52666580	0	0	1	TRUE	0
chr1	52686356	52686474	0	0	1	TRUE	0
chr1	52701010	52701128	0	0	1	TRUE	0
chr1	52842510	52843760	0	1	0	TRUE	14
chr1	52843912	52844396	0	1	0	TRUE	3
chr1	52920747	52921774	0	1	0	TRUE	10
chr1	53075956	53076076	0	1	0	TRUE	0
chr1	53086662	53086997	0	1	0	TRUE	5
chr1	53089641	53089889	0	1	0	TRUE	0
chr1	53196428	53197700	0	1	0	TRUE	10
chr1	53197826	53198504	0	1	0	TRUE	5
chr1	53220705	53220823	0	0	1	TRUE	5
chr1	53223150	53223268	0	0	1	TRUE	0
chr1	53238283	53238401	0	0	1	TRUE	6
chr1	53255191	53255309	0	0	1	TRUE	3
chr1	53266174	53266292	0	0	1	TRUE	3
chr1	53278356	53278474	0	0	1	TRUE	3
chr1	53552107	53552388	0	1	0	TRUE	4
chr1	53725512	53725630	0	0	1	TRUE	3
chr1	53734462	53734580	0	0	1	TRUE	0
chr1	53754830	53754948	0	0	1	TRUE	3
chr1	53763590	53763708	0	0	1	TRUE	0
chr1	53811720	53811838	0	0	1	TRUE	0
chr1	53821516	53821634	0	0	1	TRUE	0
chr1	53826506	53826624	0	0	1	TRUE	5
chr1	53837095	53838559	0	0	1	TRUE	9
chr1	53837095	53838559	0	0	1	TRUE	9
chr1	53861010	53861128	0	0	1	TRUE	6
chr1	53872696	53872814	0	0	1	TRUE	0
chr1	53878634	53878752	0	0	1	TRUE	0
chr1	54053192	54053310	0	0	1	TRUE	5
chr1	54070235	54070353	0	0	1	TRUE	3
chr1	54135712	54135960	0	1	0	TRUE	3
chr1	54311164	54311384	0	1	0	TRUE	5
chr1	54329588	54329843	0	1	0	TRUE	4
chr1	54548715	54548964	0	1	0	TRUE	3
chr1	54590282	54590486	0	1	0	TRUE	4
chr1	54686034	54686342	0	1	0	TRUE	3
chr1	54950205	54951230	0	1	0	TRUE	8
chr1	54978127	54978304	0	1	0	TRUE	0
chr1	54979561	54979663	0	1	0	TRUE	4
chr1	54980663	54981207	0	1	0	TRUE	5
chr1	55022195	55022313	0	0	1	TRUE	4
chr1	55035995	55036113	0	0	1	TRUE	0
chr1	55049648	55049766	0	0	1	TRUE	4
chr1	55071620	55071738	0	0	1	TRUE	5
chr1	56477292	56478076	0	1	0	TRUE	6
chr1	56780968	56781086	0	0	1	TRUE	0
chr1	56788207	56788325	0	0	1	TRUE	0
chr1	56803694	56803812	0	0	1	TRUE	0
chr1	56807090	56807208	0	0	1	TRUE	0
chr1	56821162	56821280	0	0	1	TRUE	4
chr1	56832009	56832127	0	0	1	TRUE	3
chr1	56833199	56833317	0	0	1	TRUE	3
chr1	56834585	56834703	0	0	1	TRUE	3
chr1	58249927	58250167	0	1	0	TRUE	5
chr1	58515934	58516052	0	0	1	TRUE	0
chr1	58545554	58546799	0	1	0	TRUE	10
chr1	58546831	58546949	0	0	1	TRUE	5
chr1	58649669	58649906	0	1	0	TRUE	0
chr1	58652722	58652840	0	0	1	TRUE	0
chr1	58783863	58784863	1	0	0	TRUE	0
chr1	58903134	58904492	0	1	0	TRUE	13
chr1	59079490	59079688	0	1	0	TRUE	3
chr1	59878496	59878614	0	0	1	TRUE	4
chr1	59879688	59879806	0	0	1	TRUE	0
chr1	59900769	59900887	0	0	1	TRUE	0
chr1	59903289	59903407	0	0	1	TRUE	0
chr1	59947456	59947574	0	0	1	TRUE	0
chr1	59971501	59971619	0	0	1	TRUE	4
chr1	59976938	59977056	0	0	1	TRUE	0
chr1	59995087	59995205	0	1	0	TRUE	0
chr1	60848716	60848834	0	0	1	TRUE	4
chr1	60861367	60861485	0	0	1	TRUE	0
chr1	61043064	61043182	0	0	1	TRUE	6
chr1	61050005	61050123	0	0	1	TRUE	6
chr1	61053930	61054048	0	0	1	TRUE	6
chr1	61077074	61077192	0	0	1	TRUE	5
chr1	61286073	61286231	0	1	0	TRUE	0
chr1	61741726	61743737	1	1	0	TRUE	0
chr1	61746771	61747117	1	0	0	TRUE	0
chr1	62070549	62070667	0	0	1	TRUE	0
chr1	62082866	62082984	0	0	1	TRUE	0
chr1	62111205	62111323	0	0	1	TRUE	0
chr1	62131240	62131358	0	0	1	TRUE	0
chr1	62135879	62135997	0	0	1	TRUE	0
chr1	62144369	62144487	0	0	1	TRUE	0
chr1	62175704	62175822	0	0	1	TRUE	3
chr1	62391505	62391623	0	0	1	TRUE	4
chr1	62394832	62394950	0	0	1	TRUE	3
chr1	62405439	62405557	0	0	1	TRUE	0
chr1	62407542	62407660	0	0	1	TRUE	0
chr1	62436711	62437751	0	0	1	TRUE	12
chr1	62438260	62438470	0	1	0	TRUE	0
chr1	62832431	62832549	0	0	1	TRUE	0
chr1	63557525	63557643	0	0	1	TRUE	0
chr1	63575388	63575506	0	0	1	TRUE	0
chr1	63601631	63601749	0	0	1	TRUE	0
chr1	64019955	64020171	0	1	0	TRUE	0
chr1	64240326	64240444	0	0	1	TRUE	3
chr1	64243118	64243236	0	0	1	TRUE	0
chr1	64246467	64246585	0	0	1	TRUE	0
chr1	64269186	64269304	0	0	1	TRUE	0
chr1	64824311	64824429	0	0	1	TRUE	0
chr1	64861716	64861834	0	0	1	TRUE	4
chr1	64945825	64946073	0	1	0	TRUE	0
chr1	64956767	64957509	1	0	0	TRUE	0
chr1	64965270	64967175	1	1	0	TRUE	4
chr1	64967427	64967686	1	0	0	TRUE	0
chr1	65020909	65021027	0	0	1	TRUE	0
chr1	65041415	65041605	0	1	0	TRUE	3
chr1	65060056	65060174	0	0	1	TRUE	0
chr1	65063171	65063289	0	0	1	TRUE	4
chr1	65067496	65068496	1	0	0	TRUE	0
chr1	65075506	65075624	0	0	1	TRUE	3
chr1	65687804	65687922	0	0	1	TRUE	0
chr1	65694007	65694125	0	0	1	TRUE	0
chr1	65696872	65696990	0	0	1	TRUE	3
chr1	65717950	65718068	0	0	1	TRUE	0
chr1	66242813	66242931	0	0	1	TRUE	4
chr1	66253446	66253564	0	0	1	TRUE	0
chr1	66298508	66298727	0	1	0	TRUE	0
chr1	66598729	66598852	0	1	0	TRUE	0
chr1	66711572	66711690	0	0	1	TRUE	0
chr1	66726184	66726302	0	0	1	TRUE	3
chr1	66733484	66733602	0	0	1	TRUE	0
chr1	66752278	66752396	0	0	1	TRUE	6
chr1	66761372	66761490	0	0	1	TRUE	0
chr1	66765126	66765244	0	0	1	TRUE	0
chr1	67134694	67134942	0	1	0	TRUE	5
chr1	67211734	67211852	0	0	1	TRUE	0
chr1	67214511	67214629	0	0	1	TRUE	0
chr1	67234124	67234242	0	0	1	TRUE	0
chr1	67489791	67489909	0	0	1	TRUE	0
chr1	67500570	67500688	0	0	1	TRUE	4
chr1	67514489	67514607	0	0	1	TRUE	3
chr1	67524289	67524407	0	0	1	TRUE	4
chr1	67531634	67531752	0	0	1	TRUE	0
chr1	67532520	67532638	0	0	1	TRUE	3
chr1	67535522	67535640	0	0	1	TRUE	0
chr1	67750311	67750429	0	0	1	TRUE	0
chr1	67760383	67760501	0	0	1	TRUE	0
chr1	67761863	67761981	0	0	1	TRUE	5
chr1	67766229	67766347	0	0	1	TRUE	3
chr1	67771707	67771825	0	0	1	TRUE	0
chr1	67795274	67795392	0	0	1	TRUE	4
chr1	67804869	67804987	0	0	1	TRUE	0
chr1	67830956	67831287	0	1	0	TRUE	0
chr1	68046759	68046877	0	0	1	TRUE	5
chr1	68051836	68051954	0	0	1	TRUE	3
chr1	68112011	68112129	0	0	1	TRUE	3
chr1	68116782	68116900	0	0	1	TRUE	3
chr1	68120291	68120409	0	0	1	TRUE	3
chr1	68443206	68443324	0	0	1	TRUE	5
chr1	68470497	68470615	0	0	1	TRUE	0
chr1	68497160	68497278	0	0	1	TRUE	4
chr1	70196474	70196592	0	0	1	TRUE	0
chr1	70226723	70226841	0	0	1	TRUE	4
chr1	70510233	70510351	0	0	1	TRUE	0
chr1	70528869	70528987	0	0	1	TRUE	0
chr1	71047558	71048254	1	0	1	TRUE	0
chr1	71050141	71050259	0	0	1	TRUE	0
chr1	71081247	71081365	0	0	1	TRUE	0
chr1	71087224	71087342	0	0	1	TRUE	0
chr1	71094216	71094334	0	0	1	TRUE	0
chr1	71521800	71521918	0	0	1	TRUE	0
chr1	72623335	72623453	0	0	1	TRUE	0
chr1	73813828	73813946	0	0	1	TRUE	3
chr1	73840066	73840184	0	0	1	TRUE	0
chr1	74689942	74690060	0	0	1	TRUE	0
chr1	74733835	74733953	0	0	1	TRUE	0
chr1	74744271	74744389	0	0	1	TRUE	0
chr1	74767638	74767756	0	0	1	TRUE	0
chr1	74772060	74772178	0	0	1	TRUE	0
chr1	75203839	75203957	0	0	1	TRUE	0
chr1	75214121	75214239	0	0	1	TRUE	3
chr1	75233457	75233575	0	0	1	TRUE	0
chr1	75257509	75257627	0	0	1	TRUE	0
chr1	75265823	75265941	0	0	1	TRUE	0
chr1	75764363	75764481	0	0	1	TRUE	0
chr1	76379649	76379876	0	1	0	TRUE	0
chr1	77084645	77084763	0	0	1	TRUE	4
chr1	77143659	77143777	0	0	1	TRUE	0
chr1	77148332	77148450	0	0	1	TRUE	0
chr1	77674398	77674516	0	0	1	TRUE	0
chr1	77683082	77683200	0	0	1	TRUE	7
chr1	77686848	77686966	0	0	1	TRUE	0
chr1	77888181	77888299	0	0	1	TRUE	4
chr1	77949208	77949326	0	0	1	TRUE	0
chr1	78114537	78114655	0	0	1	TRUE	0
chr1	78130895	78131013	0	0	1	TRUE	0
chr1	78145176	78145294	0	0	1	TRUE	0
chr1	78673254	78673372	0	0	1	TRUE	3
chr1	78676492	78676610	0	0	1	TRUE	0
chr1	78688818	78688936	0	0	1	TRUE	0
chr1	79040755	79040963	0	1	0	TRUE	3
chr1	80127508	80127626	0	0	1	TRUE	0
chr1	80153901	80154019	0	0	1	TRUE	0
chr1	80155507	80155625	0	0	1	TRUE	0
chr1	80217493	80217611	0	0	1	TRUE	0
chr1	80779443	80779561	0	0	1	TRUE	3
chr1	81243818	81243936	0	0	1	TRUE	0
chr1	82759169	82759287	0	0	1	TRUE	3
chr1	82775539	82775657	0	0	1	TRUE	0
chr1	82778739	82778857	0	0	1	TRUE	0
chr1	83508987	83509145	0	1	0	TRUE	3
chr1	83860551	83860669	0	0	1	TRUE	4
chr1	83882977	83883095	0	0	1	TRUE	3
chr1	83905443	83905561	0	0	1	TRUE	0
chr1	83998458	83999150	0	1	0	TRUE	7
chr1	84077974	84079044	0	1	0	TRUE	9
chr1	84156857	84157126	0	1	0	TRUE	4
chr1	84162052	84162314	0	1	0	TRUE	3
chr1	84173974	84174656	0	1	0	TRUE	6
chr1	84572600	84572837	0	1	0	TRUE	0
chr1	84572945	84574480	0	1	0	TRUE	12
chr1	85248824	85248942	0	0	1	FALSE	0
chr1	85254886	85255004	0	0	1	TRUE	0
chr1	85259702	85259820	0	0	1	TRUE	5
chr1	85274875	85275357	0	1	0	TRUE	0
chr1	85276669	85276787	0	0	1	TRUE	6
chr1	85282535	85282653	0	0	1	TRUE	3
chr1	85308248	85308366	0	0	1	TRUE	4
chr1	86356316	86356434	0	0	1	TRUE	0
chr1	86362950	86363068	0	0	1	TRUE	0
chr1	86396108	86396226	0	0	1	TRUE	6
chr1	86742083	86742201	0	0	1	TRUE	4
chr1	86753832	86753950	0	0	1	TRUE	4
chr1	86763548	86763666	0	0	1	TRUE	0
chr1	86781053	86781171	0	0	1	TRUE	3
chr1	87084389	87084507	0	0	1	TRUE	0
chr1	87120911	87121029	0	0	1	TRUE	3
chr1	87131855	87131973	0	0	1	TRUE	4
chr1	87152019	87152137	0	0	1	TRUE	6
chr1	87155479	87155597	0	0	1	TRUE	4
chr1	87201290	87201503	0	1	0	TRUE	4
chr1	88608262	88608380	0	0	1	TRUE	0
chr1	88612470	88612588	0	0	1	TRUE	4
chr1	88655827	88655945	0	0	1	TRUE	0
chr1	88684060	88684178	0	0	1	TRUE	5
chr1	88736768	88736886	0	0	1	TRUE	5
chr1	88737399	88737517	0	0	1	TRUE	5
chr1	88877501	88877619	0	0	1	TRUE	0
chr1	88922349	88922467	0	0	1	TRUE	0
chr1	88936056	88936174	0	0	1	TRUE	0
chr1	89259920	89260090	0	1	0	TRUE	4
chr1	89455300	89455418	0	0	1	TRUE	0
chr1	89460693	89460811	0	0	1	TRUE	0
chr1	89483382	89483500	0	0	1	TRUE	3
chr1	89519928	89520046	0	0	1	TRUE	0
chr1	89523606	89523837	0	1	0	TRUE	0
chr1	89763081	89763199	0	0	1	TRUE	6
chr1	89780783	89780901	0	0	1	TRUE	0
chr1	89799519	89799637	0	0	1	TRUE	4
chr1	89804778	89804896	0	0	1	TRUE	3
chr1	89821256	89821374	0	0	1	TRUE	5
chr1	89823617	89823735	0	0	1	TRUE	1
chr1	89824041	89824159	0	0	1	TRUE	3
chr1	89834235	89834353	0	0	1	TRUE	4
chr1	90046100	90046218	0	0	1	TRUE	0
chr1	90050682	90050800	0	0	1	TRUE	0
chr1	90053622	90053740	0	0	1	TRUE	4
chr1	90704809	90704927	0	0	1	TRUE	3
chr1	90712351	90712469	0	0	1	TRUE	4
chr1	90718715	90718833	0	0	1	TRUE	6
chr1	90721548	90721666	0	0	1	TRUE	0
chr1	90723839	90723957	0	0	1	TRUE	6
chr1	90725724	90725842	0	0	1	TRUE	4
chr1	90729579	90729697	0	0	1	TRUE	4
chr1	90730930	90731048	0	0	1	TRUE	4
chr1	91402098	91402216	0	0	1	TRUE	0
chr1	91404472	91404590	0	0	1	TRUE	7
chr1	91406940	91407058	0	0	1	TRUE	0
chr1	91427817	91427935	0	0	1	TRUE	0
chr1	91440992	91441110	0	0	1	TRUE	0
chr1	91449971	91450176	0	1	0	TRUE	0
chr1	91476975	91477093	0	0	1	TRUE	3
chr1	91491627	91491745	0	0	1	FALSE	0
chr1	91501405	91501523	0	0	1	TRUE	5
chr1	91507461	91507579	0	0	1	TRUE	0
chr1	91511537	91511655	0	0	1	TRUE	0
chr1	91513312	91513430	0	0	1	TRUE	0
chr1	91866651	91867543	1	0	0	TRUE	0
chr1	91885900	91887029	1	0	0	TRUE	0
chr1	91905752	91906046	1	0	0	TRUE	0
chr1	91906216	91906673	1	0	0	TRUE	0
chr1	91927417	91927535	0	0	1	TRUE	0
chr1	91932558	91932676	0	0	1	TRUE	0
chr1	91997748	91997866	0	0	1	TRUE	0
chr1	92291517	92291635	0	0	1	TRUE	0
chr1	92299040	92299158	0	0	1	TRUE	6
chr1	92310227	92310345	0	0	1	TRUE	0
chr1	92316140	92316258	0	0	1	TRUE	0
chr1	92623710	92623828	0	0	1	TRUE	0
chr1	92654195	92654313	0	0	1	TRUE	0
chr1	92818460	92818578	0	0	1	TRUE	0
chr1	92831371	92833051	1	1	1	TRUE	0
chr1	92859062	92859180	0	0	1	TRUE	4
chr1	92962522	92962659	0	1	0	TRUE	3
chr1	93180300	93180418	0	0	1	TRUE	5
chr1	93570685	93570803	0	0	1	TRUE	0
chr1	93608794	93608912	0	0	1	TRUE	3
chr1	93619635	93619753	0	0	1	TRUE	0
chr1	93622866	93623118	0	1	0	TRUE	4
chr1	93629601	93629719	0	0	1	TRUE	0
chr1	93631762	93631880	0	0	1	TRUE	0
chr1	93738418	93738624	0	1	0	TRUE	4
chr1	93909613	93909731	0	0	1	TRUE	4
chr1	94013409	94013701	0	1	0	TRUE	4
chr1	94463848	94463966	0	0	1	TRUE	0
chr1	94481597	94481715	0	0	1	TRUE	3
chr1	94514240	94514358	0	0	1	TRUE	0
chr1	94802118	94802236	0	0	1	TRUE	3
chr1	94805950	94806068	0	0	1	TRUE	3
chr1	94820562	94820680	0	0	1	TRUE	4
chr1	94821281	94822361	0	1	0	TRUE	4
chr1	94852882	94853000	0	0	1	TRUE	0
chr1	94854515	94854633	0	0	1	TRUE	4
chr1	95043542	95043660	0	0	1	TRUE	0
chr1	95084716	95084834	0	0	1	TRUE	3
chr1	95110722	95110840	0	0	1	TRUE	0
chr1	95117503	95117621	0	0	1	TRUE	5
chr1	95118925	95119043	0	0	1	TRUE	0
chr1	95139987	95140105	0	0	1	TRUE	0
chr1	95232936	95233139	0	1	0	TRUE	0
chr1	96842351	96842469	0	0	1	TRUE	0
chr1	96845588	96845706	0	0	1	TRUE	3
chr1	96872899	96873017	0	0	1	TRUE	0
chr1	96966684	96966802	0	0	1	TRUE	0
chr1	97018058	97018176	0	0	1	TRUE	0
chr1	97384674	97384840	0	1	0	TRUE	0
chr1	98556683	98556801	0	0	1	TRUE	0
chr1	98725397	98725515	0	0	1	TRUE	0
chr1	98749279	98749397	0	0	1	TRUE	0
chr1	98791619	98791737	0	0	1	TRUE	0
chr1	98792341	98792459	0	0	1	TRUE	0
chr1	98794410	98794528	0	0	1	TRUE	0
chr1	99146223	99146341	0	0	1	TRUE	3
chr1	99171253	99171371	0	0	1	TRUE	4
chr1	99173785	99173903	0	0	1	TRUE	0
chr1	99177611	99177729	0	0	1	TRUE	0
chr1	99180399	99180517	0	0	1	TRUE	0
chr1	99503239	99503349	0	1	0	TRUE	0
chr1	99737160	99737278	0	0	1	TRUE	3
chr1	100038232	100039366	0	1	0	TRUE	11
chr1	100895894	100896012	0	0	1	TRUE	7
chr1	100896732	100896850	0	0	1	TRUE	6
chr1	100921228	100921346	0	0	1	TRUE	3
chr1	100928306	100928424	0	0	1	TRUE	3
chr1	101237528	101237685	0	1	0	TRUE	5
chr1	101371104	101371222	0	0	1	TRUE	0
chr1	101387069	101387187	0	0	1	FALSE	0
chr1	101406393	101406511	0	0	1	TRUE	4
chr1	101438526	101438644	0	0	1	TRUE	3
chr1	101455312	101455430	0	0	1	TRUE	3
chr1	101466100	101466218	0	0	1	TRUE	0
chr1	101474175	101474293	0	0	1	TRUE	0
chr1	101506686	101506804	0	0	1	TRUE	0
chr1	101520368	101520486	0	0	1	TRUE	0
chr1	102456041	102456159	0	0	1	TRUE	3
chr1	103108246	103109110	1	0	0	TRUE	0
chr1	103109329	103109330	1	0	0	TRUE	0
chr1	103515062	103515180	0	0	1	TRUE	0
chr1	103526096	103526214	0	0	1	TRUE	6
chr1	104263288	104263406	0	0	1	FALSE	0
chr1	104648287	104648405	0	0	1	TRUE	0
chr1	105793683	105793801	0	0	1	TRUE	0
chr1	107176880	107176998	0	0	1	TRUE	0
chr1	107197098	107197216	0	0	1	TRUE	0
chr1	107750514	107750632	0	0	1	TRUE	0
chr1	107756787	107756905	0	0	1	TRUE	0
chr1	107782336	107782454	0	0	1	TRUE	0
chr1	108119657	108119775	0	0	1	TRUE	0
chr1	108121499	108121617	0	0	1	TRUE	4
chr1	108125660	108125778	0	0	1	TRUE	0
chr1	108130982	108131100	0	0	1	TRUE	0
chr1	108511913	108512031	0	0	1	TRUE	0
chr1	108513372	108513558	0	1	0	TRUE	0
chr1	108692312	108693715	0	0	1	TRUE	14
chr1	108709147	108709265	0	0	1	TRUE	3
chr1	108746662	108747767	0	1	0	TRUE	10
chr1	108865988	108866248	0	1	0	TRUE	4
chr1	108898248	108898366	0	0	1	TRUE	0
chr1	109248954	109250268	1	0	0	TRUE	0
chr1	109397862	109397980	0	0	1	TRUE	9
chr1	109398218	109398336	0	0	1	TRUE	6
chr1	109399498	109399616	0	0	1	TRUE	0
chr1	109453108	109453226	0	0	1	TRUE	0
chr1	109483938	109484712	0	1	0	TRUE	9
chr1	109498424	109498542	0	0	1	TRUE	5
chr1	109500047	109500165	0	0	1	TRUE	5
chr1	109530633	109530751	0	0	1	TRUE	7
chr1	109532412	109532530	0	0	1	TRUE	5
chr1	109544186	109544304	0	0	1	TRUE	5
chr1	109546387	109546505	0	0	1	TRUE	0
chr1	109740996	109741114	0	0	1	TRUE	3
chr1	109767872	109767990	0	0	1	TRUE	3
chr1	109773798	109773916	0	0	1	TRUE	3
chr1	109776958	109777076	0	0	1	TRUE	4
chr1	109788953	109789071	0	0	1	TRUE	4
chr1	109791134	109791252	0	0	1	TRUE	5
chr1	109792156	109792274	0	0	1	TRUE	4
chr1	109793659	109793777	0	0	1	TRUE	3
chr1	109803281	109803399	0	0	1	TRUE	0
chr1	109806755	109806873	0	0	1	TRUE	0
chr1	109808903	109809021	0	0	1	TRUE	4
chr1	109919599	109919769	0	1	0	TRUE	0
chr1	109935711	109936111	0	1	0	TRUE	3
chr1	110029701	110029819	0	0	1	TRUE	0
chr1	110034591	110035672	0	0	1	TRUE	11
chr1	110047629	110047747	0	0	1	TRUE	3
chr1	110053952	110054070	0	0	1	TRUE	5
chr1	110060204	110060322	0	0	1	TRUE	5
chr1	110088199	110088317	0	0	1	TRUE	3
chr1	110337720	110338322	0	1	0	TRUE	5
chr1	110460384	110460502	0	0	1	TRUE	4
chr1	110463093	110463211	0	0	1	TRUE	3
chr1	110465413	110465531	0	0	1	TRUE	1
chr1	110465818	110465936	0	0	1	TRUE	4
chr1	110467823	110467941	0	0	1	TRUE	0
chr1	110471279	110471397	0	0	1	TRUE	0
chr1	110475489	110475607	0	0	1	TRUE	3
chr1	110477799	110477917	0	0	1	TRUE	4
chr1	110482091	110482209	0	0	1	TRUE	4
chr1	110483004	110483122	0	0	1	TRUE	3
chr1	110496125	110496243	0	0	1	TRUE	3
chr1	110501506	110501624	0	0	1	TRUE	5
chr1	110510193	110510311	0	0	1	TRUE	0
chr1	110513470	110513588	0	0	1	TRUE	0
chr1	110524590	110524708	0	0	1	TRUE	4
chr1	110533373	110533491	0	0	1	TRUE	5
chr1	110638229	110638423	0	1	0	TRUE	3
chr1	110963025	110963944	0	1	0	TRUE	9
chr1	111422969	111423087	0	0	1	TRUE	6
chr1	111441701	111441819	0	0	1	TRUE	5
chr1	111449076	111449194	0	0	1	TRUE	7
chr1	111468508	111468626	0	0	1	TRUE	4
chr1	111481758	111481876	0	0	1	TRUE	0
chr1	111484120	111484238	0	0	1	TRUE	4
chr1	111737859	111737977	0	0	1	TRUE	0
chr1	111738982	111739100	0	0	1	TRUE	6
chr1	111740425	111740543	0	0	1	TRUE	6
chr1	111743290	111743408	0	0	1	TRUE	3
chr1	111746752	111746870	0	0	1	TRUE	4
chr1	111755617	111755735	0	0	1	TRUE	4
chr1	111758521	111758639	0	0	1	TRUE	0
chr1	111769683	111769801	0	0	1	TRUE	3
chr1	111784192	111784310	0	0	1	TRUE	0
chr1	111790069	111790187	0	0	1	TRUE	3
chr1	111801590	111801708	0	0	1	TRUE	5
chr1	111813885	111814003	0	0	1	TRUE	3
chr1	112358916	112359034	0	0	1	TRUE	5
chr1	112369803	112369921	0	0	1	TRUE	4
chr1	112390946	112391064	0	0	1	TRUE	4
chr1	112394617	112394735	0	0	1	TRUE	0
chr1	112672896	112673014	0	0	1	TRUE	0
chr1	112674670	112675861	0	0	1	TRUE	12
chr1	112700957	112701075	0	0	1	TRUE	4
chr1	112701403	112701521	0	0	1	TRUE	4
chr1	112707419	112707537	0	0	1	TRUE	6
chr1	112712363	112712481	0	0	1	TRUE	4
chr1	112714737	112714855	0	0	1	TRUE	6
chr1	112718797	112718915	0	0	1	TRUE	4
chr1	112723178	112723296	0	0	1	TRUE	4
chr1	112727857	112727975	0	0	1	TRUE	4
chr1	112735768	112735886	0	0	1	TRUE	0
chr1	112849229	112850643	0	1	0	TRUE	10
chr1	112935635	112936285	1	0	0	TRUE	0
chr1	112955813	112957103	1	0	0	TRUE	0
chr1	113057078	113057196	0	0	1	TRUE	3
chr1	113072711	113072829	0	0	1	TRUE	0
chr1	113110300	113110418	0	0	1	TRUE	0
chr1	113129668	113129786	0	0	1	TRUE	3
chr1	113759361	113759479	0	0	1	TRUE	7
chr1	113760360	113760478	0	0	1	TRUE	3
chr1	113811896	113812014	0	0	1	TRUE	7
chr1	113812171	113812289	0	0	1	TRUE	7
chr1	113905202	113905320	0	0	1	TRUE	5
chr1	113949268	113949386	0	0	1	TRUE	3
chr1	113963619	113963737	0	0	1	TRUE	3
chr1	113978796	113979782	1	0	0	TRUE	0
chr1	114105652	114105888	0	1	0	TRUE	5
chr1	114464747	114465077	1	0	0	TRUE	0
chr1	114509791	114511910	1	1	0	TRUE	0
chr1	114758136	114758254	0	0	1	TRUE	5
chr1	114780034	114780687	0	0	1	TRUE	5
chr1	115069522	115069640	0	0	1	TRUE	3
chr1	115086311	115086429	0	0	1	TRUE	4
chr1	115089634	115089752	0	0	1	TRUE	7
chr1	115090008	115090126	0	0	1	TRUE	6
chr1	115090666	115090784	0	0	1	TRUE	3
chr1	115112922	115113040	0	0	1	TRUE	4
chr1	115764710	115764828	0	0	1	TRUE	5
chr1	115807873	115807991	0	0	1	TRUE	4
chr1	116046766	116046974	0	1	0	TRUE	0
chr1	116125820	116125938	0	0	1	TRUE	0
chr1	116134310	116134428	0	0	1	TRUE	3
chr1	116151028	116152642	0	1	0	TRUE	12
chr1	116372422	116374116	1	0	0	TRUE	0
chr1	116377203	116377413	1	0	0	TRUE	0
chr1	116377421	116378203	1	0	0	TRUE	0
chr1	116382619	116382665	1	0	0	TRUE	0
chr1	116382829	116383302	1	0	0	TRUE	0
chr1	116460711	116460863	0	1	0	TRUE	0
chr1	116570412	116570530	0	0	1	TRUE	5
chr1	116574739	116574857	0	0	1	TRUE	3
chr1	116577084	116577202	0	0	1	TRUE	0
chr1	116909220	116910172	1	0	0	TRUE	0
chr1	116930363	116930691	1	0	0	TRUE	0
chr1	116931158	116931363	1	0	0	TRUE	0
chr1	117036255	117036373	0	0	1	TRUE	3
chr1	117055471	117055589	0	0	1	TRUE	0
chr1	117067905	117068023	0	0	1	TRUE	4
chr1	117284739	117284857	0	0	1	TRUE	4
chr1	117512834	117512952	0	0	1	TRUE	0
chr1	117535121	117535239	0	0	1	TRUE	3
chr1	117733167	117733452	0	1	0	TRUE	4
chr1	117967565	117967683	0	0	1	TRUE	0
chr1	119711608	119712979	1	0	0	TRUE	3
chr1	119719380	119719660	1	0	0	TRUE	0
chr1	119738314	119738432	0	0	1	TRUE	4
chr1	119743362	119743480	0	0	1	TRUE	4
chr1	119744201	119744319	0	0	1	TRUE	3
chr1	119768784	119769213	1	0	0	TRUE	0
chr1	121586488	121586606	0	0	1	FALSE	0
chr1	145688233	145688740	1	0	0	TRUE	0
chr1	145693860	145694068	0	1	0	TRUE	3
chr1	145707150	145708257	1	0	0	TRUE	0
chr1	145801151	145801327	0	1	0	TRUE	0
chr1	145845632	145846716	0	1	0	TRUE	11
chr1	145897996	145898209	0	1	0	TRUE	0
chr1	145963438	145963702	0	1	0	TRUE	0
chr1	145995755	145996487	1	0	0	TRUE	0
chr1	145996491	145997381	1	0	0	TRUE	0
chr1	146032755	146032873	0	0	1	TRUE	3
chr1	146037771	146037889	0	0	1	TRUE	5
chr1	146052096	146052214	0	0	1	TRUE	0
chr1	147170919	147171807	0	1	0	TRUE	5
chr1	147171913	147172589	0	1	0	TRUE	7
chr1	147224827	147225638	0	1	0	TRUE	10
chr1	147540668	147541084	1	0	0	TRUE	0
chr1	147541179	147542337	1	1	0	TRUE	0
chr1	147542615	147542878	0	1	0	TRUE	3
chr1	147598944	147599489	1	1	0	TRUE	0
chr1	147599494	147599515	1	0	0	TRUE	0
chr1	147599516	147600642	1	1	0	TRUE	5
chr1	147600692	147601180	0	1	0	TRUE	3
chr1	147669339	147670512	0	1	0	TRUE	16
chr1	147723994	147724326	0	1	0	TRUE	3
chr1	148263044	148264464	0	1	0	TRUE	10
chr1	148339464	148339582	0	0	1	TRUE	0
chr1	148344758	148344876	0	0	1	TRUE	0
chr1	148345599	148345783	0	0	1	TRUE	0
chr1	148371604	148371722	0	0	1	TRUE	0
chr1	148379188	148379306	0	0	1	TRUE	0
chr1	148384003	148384238	0	0	1	TRUE	0
chr1	148388281	148389302	0	1	0	TRUE	5
chr1	148459385	148459547	0	1	0	TRUE	0
chr1	149032076	149032194	0	0	1	TRUE	0
chr1	149887682	149887916	0	1	0	TRUE	5
chr1	149899581	149900473	0	1	0	TRUE	11
chr1	149927091	149928252	0	1	0	TRUE	10
chr1	150007848	150008095	0	1	0	TRUE	3
chr1	150008487	150009291	0	1	0	TRUE	0
chr1	150009392	150010737	0	1	0	TRUE	14
chr1	150161378	150161496	0	0	1	TRUE	4
chr1	150162293	150162411	0	0	1	TRUE	3
chr1	150162636	150162754	0	0	1	TRUE	1
chr1	150166120	150166238	0	0	1	TRUE	5
chr1	150169104	150169222	0	0	1	TRUE	4
chr1	150187431	150187547	0	0	1	TRUE	3
chr1	150213972	150214090	0	0	1	TRUE	0
chr1	150221670	150221788	0	0	1	TRUE	0
chr1	150235402	150235520	0	0	1	TRUE	6
chr1	150236570	150236688	0	0	1	TRUE	3
chr1	150256016	150256134	0	0	1	TRUE	4
chr1	150268140	150269209	0	1	0	TRUE	12
chr1	150272635	150272753	0	0	1	TRUE	0
chr1	150366009	150366261	0	1	0	TRUE	0
chr1	150366488	150366849	0	1	0	TRUE	0
chr1	150534846	150535167	0	1	0	TRUE	4
chr1	150556352	150556737	0	1	0	TRUE	6
chr1	150558921	150559228	0	1	0	TRUE	6
chr1	150559917	150560483	0	1	0	TRUE	4
chr1	150563278	150564017	0	1	0	TRUE	3
chr1	150569965	150570168	0	1	0	TRUE	0
chr1	150570310	150570536	0	1	0	TRUE	0
chr1	150575883	150576224	0	1	0	TRUE	0
chr1	150577143	150577460	0	1	0	TRUE	0
chr1	150579488	150580303	1	0	0	TRUE	0
chr1	150604333	150605138	0	1	0	TRUE	4
chr1	150605276	150605519	0	1	0	FALSE	0
chr1	150765707	150766254	1	0	0	TRUE	0
chr1	150765707	150766254	1	0	0	TRUE	0
chr1	150816758	150816921	0	1	0	TRUE	4
chr1	150875600	150877099	1	1	0	TRUE	4
chr1	150926338	150927010	0	1	0	TRUE	4
chr1	150968544	150968930	0	1	0	TRUE	5
chr1	150970854	150972479	0	1	0	TRUE	9
chr1	150973311	150975003	0	1	0	TRUE	20
chr1	150979096	150979774	0	1	0	TRUE	5
chr1	150981272	150982507	1	1	0	TRUE	0
chr1	151006171	151006797	0	0	1	TRUE	6
chr1	151008412	151008530	0	0	1	TRUE	6
chr1	151024511	151024885	0	0	1	TRUE	3
chr1	151047782	151048918	0	0	1	TRUE	12
chr1	151051656	151051774	0	0	1	TRUE	3
chr1	151057901	151058019	0	0	1	TRUE	3
chr1	151059564	151059682	0	0	1	TRUE	6
chr1	151064643	151064761	0	0	1	TRUE	0
chr1	151069253	151069603	0	1	0	TRUE	4
chr1	151070603	151071503	0	0	1	TRUE	9
chr1	151071648	151072023	0	1	0	TRUE	0
chr1	151281252	151281370	0	0	1	TRUE	3
chr1	151283157	151283275	0	0	1	TRUE	5
chr1	151286663	151286781	0	0	1	TRUE	5
chr1	151292575	151292693	0	0	1	TRUE	5
chr1	151300996	151301114	0	0	1	TRUE	3
chr1	151301887	151302005	0	0	1	TRUE	4
chr1	151326004	151326381	0	1	0	TRUE	0
chr1	151326556	151327657	0	1	0	TRUE	11
chr1	151368045	151369122	0	1	0	TRUE	6
chr1	151369554	151370056	0	0	1	TRUE	5
chr1	151370139	151370903	0	1	0	TRUE	6
chr1	151371345	151372734	0	1	0	TRUE	8
chr1	151399564	151400287	0	0	1	TRUE	7
chr1	151406008	151406144	0	1	0	TRUE	6
chr1	151457131	151457458	0	1	0	TRUE	3
chr1	151457897	151459465	0	1	0	TRUE	15
chr1	151470440	151470564	0	1	0	TRUE	4
chr1	151472830	151474073	0	1	0	TRUE	7
chr1	151511385	151512239	0	1	0	TRUE	10
chr1	151512377	151512595	0	1	0	TRUE	5
chr1	151512798	151513462	0	1	0	TRUE	6
chr1	151513514	151514747	0	1	0	TRUE	10
chr1	151557632	151557805	0	1	0	TRUE	0
chr1	151612185	151613147	0	1	0	TRUE	11
chr1	151613538	151613824	0	1	0	TRUE	5
chr1	151734741	151734843	0	1	0	TRUE	3
chr1	151737491	151737756	0	1	0	TRUE	0
chr1	151763479	151763916	0	1	0	TRUE	3
chr1	151804294	151804629	0	1	0	TRUE	4
chr1	151838468	151840465	0	1	0	TRUE	20
chr1	151846311	151846429	0	0	1	TRUE	0
chr1	151853486	151853604	0	0	1	TRUE	6
chr1	151889098	151889216	0	0	1	TRUE	0
chr1	151898552	151898670	0	0	1	TRUE	0
chr1	151908501	151908619	0	0	1	TRUE	0
chr1	151909089	151909885	0	0	1	TRUE	10
chr1	151988460	151988932	0	1	0	TRUE	0
chr1	151989193	151989880	0	1	0	TRUE	5
chr1	151990092	151990583	0	1	0	TRUE	3
chr1	151990826	151991176	0	1	0	TRUE	4
chr1	151992275	151994238	0	1	0	TRUE	19
chr1	152001847	152001965	0	0	1	TRUE	0
chr1	152004193	152004311	0	0	1	TRUE	3
chr1	152013772	152013890	0	0	1	TRUE	0
chr1	152018683	152018801	0	0	1	TRUE	0
chr1	152034357	152035627	0	0	1	TRUE	7
chr1	152035795	152037035	0	1	0	TRUE	11
chr1	152048551	152048669	0	0	1	TRUE	4
chr1	152051361	152051479	0	0	1	TRUE	4
chr1	152052683	152052801	0	0	1	TRUE	3
chr1	152112226	152112403	0	1	0	TRUE	0
chr1	152440810	152441264	0	1	0	TRUE	4
chr1	152871494	152871612	0	0	1	TRUE	3
chr1	152878158	152878276	0	0	1	TRUE	0
chr1	152881039	152881157	0	0	1	TRUE	4
chr1	152917934	152918052	0	0	1	TRUE	0
chr1	153122682	153123541	0	1	0	TRUE	0
chr1	153288790	153288908	0	0	1	TRUE	4
chr1	153293139	153293257	0	0	1	TRUE	5
chr1	153312738	153312856	0	0	1	TRUE	0
chr1	153339904	153340022	0	0	1	TRUE	3
chr1	153344793	153344911	0	0	1	TRUE	4
chr1	153348518	153348841	0	0	1	TRUE	3
chr1	153352562	153352680	0	0	1	TRUE	3
chr1	153353714	153353832	0	0	1	TRUE	5
chr1	153355604	153355722	0	0	1	TRUE	6
chr1	153356540	153356679	0	1	0	TRUE	5
chr1	153357009	153357352	1	0	1	TRUE	0
chr1	153357495	153358420	1	1	0	TRUE	0
chr1	153360300	153360505	0	1	0	TRUE	3
chr1	153361029	153361473	0	1	0	TRUE	0
chr1	153362471	153362740	0	1	0	TRUE	3
chr1	153490309	153490427	0	0	1	TRUE	6
chr1	153495027	153495145	0	0	1	TRUE	5
chr1	153509870	153509988	0	0	1	TRUE	3
chr1	153513226	153513344	0	0	1	TRUE	4
chr1	153531688	153531898	0	1	0	TRUE	0
chr1	153532049	153532564	0	1	0	TRUE	4
chr1	153532686	153534596	0	0	1	TRUE	14
chr1	153534832	153535044	0	1	0	TRUE	0
chr1	153535208	153536241	0	1	0	TRUE	8
chr1	153547121	153547239	0	0	1	TRUE	3
chr1	153548250	153548368	0	0	1	TRUE	0
chr1	153549514	153549632	0	0	1	TRUE	3
chr1	153608129	153608247	0	0	1	TRUE	3
chr1	153610355	153610902	0	1	0	TRUE	3
chr1	153610960	153611359	0	1	0	TRUE	4
chr1	153612190	153612559	0	1	0	TRUE	4
chr1	153612622	153613168	0	1	0	TRUE	5
chr1	153614629	153614747	0	0	1	TRUE	3
chr1	153617722	153617840	0	0	1	TRUE	4
chr1	153626829	153627048	0	1	0	TRUE	4
chr1	153627627	153627745	0	0	1	TRUE	4
chr1	153633934	153634092	0	0	1	TRUE	6
chr1	153647379	153647497	0	0	1	TRUE	3
chr1	153658605	153659387	0	0	1	TRUE	10
chr1	153671118	153671236	0	0	1	TRUE	0
chr1	153677807	153677925	0	0	1	TRUE	4
chr1	153728090	153729090	0	1	0	TRUE	8
chr1	153772034	153772152	0	0	1	TRUE	5
chr1	153775172	153775290	0	0	1	TRUE	3
chr1	153775291	153776588	0	0	1	TRUE	14
chr1	153783139	153784186	0	0	1	TRUE	9
chr1	153789474	153789592	0	0	1	TRUE	0
chr1	153789846	153789964	0	0	1	TRUE	4
chr1	153791929	153792047	0	0	1	TRUE	0
chr1	153796388	153796506	0	0	1	TRUE	4
chr1	153797035	153797192	0	1	0	TRUE	4
chr1	153797341	153797459	0	0	1	TRUE	1
chr1	153821444	153821562	0	0	1	TRUE	0
chr1	153957600	153958656	0	1	0	TRUE	11
chr1	153961649	153961786	0	1	0	TRUE	0
chr1	153962614	153962732	0	0	1	TRUE	5
chr1	153966595	153966713	0	0	1	TRUE	0
chr1	153966928	153968448	1	0	0	TRUE	0
chr1	153976560	153977975	0	0	1	TRUE	12
chr1	153986850	153986968	0	0	1	TRUE	3
chr1	154179221	154179432	0	1	0	TRUE	3
chr1	154186210	154186328	0	0	1	TRUE	3
chr1	154192091	154192209	0	0	1	TRUE	0
chr1	154199625	154199743	0	0	1	TRUE	3
chr1	154272562	154273202	0	1	0	TRUE	8
chr1	154351397	154351614	0	1	0	TRUE	3
chr1	154351690	154351963	0	1	0	TRUE	1
chr1	154352279	154353936	0	1	0	TRUE	11
chr1	154556485	154556777	0	1	0	TRUE	4
chr1	154558157	154558644	0	1	0	TRUE	5
chr1	154698319	154698454	0	1	0	TRUE	0
chr1	154861819	154861956	0	1	0	TRUE	4
chr1	154936263	154937008	0	1	0	TRUE	8
chr1	154961470	154961782	0	1	0	TRUE	6
chr1	154975692	154975892	0	1	0	TRUE	5
chr1	155001877	155002883	1	1	0	TRUE	2
chr1	155003881	155004398	0	1	0	TRUE	5
chr1	155005143	155005363	0	1	0	TRUE	4
chr1	155005557	155005919	0	1	0	TRUE	6
chr1	155006560	155007166	0	1	0	TRUE	3
chr1	155007577	155007851	1	1	0	TRUE	0
chr1	155008020	155009098	1	1	0	TRUE	0
chr1	155009265	155009623	0	1	0	TRUE	4
chr1	155010229	155011276	1	1	0	TRUE	0
chr1	155011943	155012685	0	1	0	TRUE	4
chr1	155013074	155013295	0	1	0	TRUE	0
chr1	155013586	155014131	0	1	0	TRUE	5
chr1	155022810	155023584	0	1	0	TRUE	6
chr1	155043269	155043746	0	1	0	TRUE	0
chr1	155044725	155045206	0	1	0	TRUE	0
chr1	155052165	155052477	0	1	0	TRUE	4
chr1	155052535	155053488	0	1	0	TRUE	9
chr1	155123797	155124192	0	1	0	TRUE	0
chr1	155124466	155125006	0	1	0	TRUE	5
chr1	155125418	155125782	0	1	0	TRUE	4
chr1	155125903	155126872	0	1	0	TRUE	7
chr1	155127872	155128222	0	1	0	TRUE	6
chr1	155128502	155128860	0	1	0	TRUE	4
chr1	155131309	155131663	0	1	0	TRUE	4
chr1	155135811	155136502	0	1	0	TRUE	7
chr1	155136739	155137915	0	1	0	TRUE	10
chr1	155139881	155140407	0	1	0	TRUE	5
chr1	155167458	155167576	0	0	1	TRUE	6
chr1	155173321	155173439	0	0	1	TRUE	5
chr1	155176733	155176851	0	0	1	TRUE	4
chr1	155185429	155185547	0	0	1	TRUE	5
chr1	155192778	155193709	1	0	1	TRUE	0
chr1	155193915	155194105	0	1	0	TRUE	4
chr1	155206959	155207077	0	0	1	TRUE	4
chr1	155208981	155209625	0	0	1	TRUE	7
chr1	155226737	155226855	0	0	1	TRUE	3
chr1	155250175	155250871	0	1	0	TRUE	8
chr1	155253326	155253567	0	1	0	TRUE	0
chr1	155253887	155254146	0	1	0	TRUE	3
chr1	155254463	155255483	0	1	0	TRUE	10
chr1	155261323	155262385	0	1	0	TRUE	10
chr1	155272553	155273529	0	1	0	TRUE	9
chr1	155308913	155310050	0	1	0	TRUE	11
chr1	155322600	155322936	0	1	0	TRUE	5
chr1	155325147	155325550	0	1	0	TRUE	6
chr1	155762141	155762331	0	1	0	TRUE	0
chr1	155765110	155765219	0	1	0	TRUE	3
chr1	155933658	155933927	0	1	0	TRUE	0
chr1	155934034	155934442	0	1	0	TRUE	6
chr1	155974451	155975210	0	1	0	TRUE	4
chr1	155975927	155977092	0	1	0	TRUE	7
chr1	155977319	155978175	0	1	0	TRUE	7
chr1	156050363	156050713	0	1	0	TRUE	0
chr1	156081795	156082795	1	0	0	TRUE	0
chr1	156100286	156100686	0	1	0	TRUE	3
chr1	156104774	156105609	0	1	0	TRUE	8
chr1	156105975	156107310	0	1	0	TRUE	9
chr1	156113919	156116457	1	1	0	TRUE	6
chr1	156118224	156118745	0	1	0	TRUE	3
chr1	156119555	156120497	0	1	0	TRUE	6
chr1	156121489	156121943	0	1	0	TRUE	4
chr1	156122522	156124236	0	1	0	TRUE	16
chr1	156124692	156125116	0	1	0	TRUE	4
chr1	156125366	156125452	1	0	0	FALSE	0
chr1	156126034	156126371	1	0	0	TRUE	0
chr1	156129866	156130838	1	0	0	TRUE	0
chr1	156212987	156213681	0	1	0	TRUE	7
chr1	156214289	156214508	0	1	0	TRUE	0
chr1	156225370	156225696	0	1	0	TRUE	0
chr1	156274023	156274236	1	0	0	TRUE	0
chr1	156282579	156283456	1	0	0	TRUE	0
chr1	156291248	156292243	1	0	0	TRUE	0
chr1	156369188	156369671	0	0	1	TRUE	4
chr1	156369684	156369956	0	1	0	TRUE	4
chr1	156371945	156372280	0	1	0	TRUE	2
chr1	156372569	156372687	0	0	1	TRUE	1
chr1	156376197	156376315	0	0	1	TRUE	0
chr1	156379629	156379747	0	0	1	TRUE	3
chr1	156383086	156383204	0	0	1	TRUE	5
chr1	156385722	156385840	0	0	1	TRUE	3
chr1	156395136	156395254	0	0	1	TRUE	3
chr1	156413849	156413967	0	0	1	TRUE	4
chr1	156415632	156415750	0	0	1	TRUE	5
chr1	156420017	156420135	0	0	1	TRUE	7
chr1	156456301	156457932	0	1	0	TRUE	16
chr1	156458193	156458479	0	1	0	TRUE	4
chr1	156460512	156460987	0	1	0	TRUE	5
chr1	156461930	156462138	0	1	0	TRUE	6
chr1	156462319	156462622	0	1	0	TRUE	3
chr1	156463451	156463676	0	1	0	TRUE	3
chr1	156463886	156464670	0	1	0	TRUE	5
chr1	156465049	156465633	0	1	0	TRUE	4
chr1	156465768	156466709	0	1	0	TRUE	6
chr1	156490349	156491068	1	0	0	TRUE	0
chr1	156491258	156491349	1	0	0	TRUE	0
[truncated: 34,075 more rows]
