# Supplementary material for: Genetic and epigenetic driven variation in regulatory regions activity contribute to adaptation and evolution under endocrine treatment
Source: Research Square preprint supplement (doi:10.21203/rs.3.rs-1432636/v1), 2022-03-30
Supplement: Supplementary file 2 [file 87b92f0819c9513bb3920566.xlsx]

## Sheet: S4.1
identifier	genome_partition	pool	logCPM_day21_vs_day07	log2FC_vs_lib_day21	log2FC_day21_vs_day07	FDR_day21_vs_day07	Exhausted	Expanded
101026_4	positive_control	pool1	3.394	-1.229	-0.89	0.0121884	TRUE	FALSE
101026_4	positive_control	pool2	3.571	-1.354	-1.044	0.00137545	TRUE	FALSE
109335_12	positive_control	pool1	2.633	-0.305	-0.023	0.991314	FALSE	FALSE
109335_12	positive_control	pool2	3.08	-0.382	0.073	0.948125	FALSE	FALSE
109335_47	positive_control	pool1	4.01	-0.524	-0.16	0.850704	FALSE	FALSE
109335_47	positive_control	pool2	3.652	-0.919	-0.407	0.405874	FALSE	FALSE
109779_103	positive_control	pool1	3.628	-0.188	0.044	0.975418	FALSE	FALSE
109779_103	positive_control	pool2	2.772	-1.358	-0.652	0.327241	FALSE	FALSE
109779_88	positive_control	pool1	3.467	-0.56	-0.291	0.760104	FALSE	FALSE
109779_88	positive_control	pool2	3.393	-0.204	0.16	0.855486	FALSE	FALSE
113771_17	positive_control	pool1	3.883	-0.451	-0.495	0.290092	FALSE	FALSE
113771_17	positive_control	pool2	3.502	-0.565	-0.35	0.608725	FALSE	FALSE
113771_18	positive_control	pool1	3.456	-0.995	-0.504	0.43557	FALSE	FALSE
113771_18	positive_control	pool2	3.27	-0.993	-0.565	0.361971	FALSE	FALSE
113771_23	positive_control	pool1	4.001	-0.339	-0.313	0.609086	FALSE	FALSE
113771_23	positive_control	pool2	3.613	-0.828	-0.711	0.0398017	TRUE	FALSE
126595_10	positive_control	pool1	3.553	-0.705	-0.532	0.348445	FALSE	FALSE
126595_10	positive_control	pool2	3.593	-0.494	-0.24	0.780837	FALSE	FALSE
126595_70	positive_control	pool1	3.42	-0.794	-0.569	0.263795	FALSE	FALSE
126595_70	positive_control	pool2	3.417	-0.635	-0.143	0.870039	FALSE	FALSE
127721_12	positive_control	pool1	3.284	-0.662	-0.466	0.47244	FALSE	FALSE
127721_12	positive_control	pool2	3.687	-0.414	-0.076	0.936587	FALSE	FALSE
127721_32	positive_control	pool1	3.883	-0.246	-0.055	0.967379	FALSE	FALSE
127721_32	positive_control	pool2	2.997	-0.617	-0.19	0.852459	FALSE	FALSE
158738_36	positive_control	pool1	3.89	-0.194	0.309	0.622088	FALSE	FALSE
158738_36	positive_control	pool2	3.809	-0.425	-0.115	0.913132	FALSE	FALSE
158738_68	positive_control	pool1	3.709	-0.292	0.379	0.608514	FALSE	FALSE
158738_68	positive_control	pool2	3.222	-0.909	-0.231	0.772531	FALSE	FALSE
173365_138	positive_control	pool1	2.857	-0.878	-0.461	0.568663	FALSE	FALSE
173365_138	positive_control	pool2	2.656	-1.238	-0.951	0.0500813	FALSE	FALSE
173365_38	positive_control	pool1	3.629	-1.447	-1.213	9.29011e-05	TRUE	FALSE
173365_38	positive_control	pool2	3.576	-1.095	-0.579	0.351973	FALSE	FALSE
173365_44	positive_control	pool1	3.779	-0.332	-0.556	0.191411	FALSE	FALSE
173365_44	positive_control	pool2	3.2	-1.415	-1.367	2.52873e-05	TRUE	FALSE
173370_13	positive_control	pool1	2.519	-2.082	-1.662	8.24133e-06	TRUE	FALSE
173370_13	positive_control	pool2	2.39	-2.809	-2.384	3.08978e-11	TRUE	FALSE
173370_16	positive_control	pool1	1.797	-2.348	-1.968	5.62254e-06	TRUE	FALSE
173370_16	positive_control	pool2	2.144	-2.288	-1.732	0.00417763	TRUE	FALSE
173370_76	positive_control	pool1	2.873	-3.382	-2.876	1.10309e-19	TRUE	FALSE
173370_76	positive_control	pool2	2.811	-3.223	-2.876	8.98542e-19	TRUE	FALSE
27088_13	positive_control	pool1	3.783	-0.502	-0.203	0.806438	FALSE	FALSE
27088_13	positive_control	pool2	3.513	-0.83	-0.268	0.678552	FALSE	FALSE
27088_7	positive_control	pool1	3.84	-0.431	-0.068	0.956606	FALSE	FALSE
27088_7	positive_control	pool2	3.343	-0.504	0.07	0.945662	FALSE	FALSE
73935_13	positive_control	pool1	2.836	-0.398	-0.098	0.958133	FALSE	FALSE
73935_13	positive_control	pool2	2.943	-0.931	-0.481	0.532582	FALSE	FALSE
73935_72	positive_control	pool1	2.969	-0.782	-0.238	0.837377	FALSE	FALSE
73935_72	positive_control	pool2	2.99	-0.747	0.061	0.959761	FALSE	FALSE
88318_64	positive_control	pool1	3.458	-1.621	-1.361	1.16977e-06	TRUE	FALSE
88318_64	positive_control	pool2	3.583	-1.527	-1.216	8.05565e-06	TRUE	FALSE
90441_34	positive_control	pool1	3.894	-0.314	-0.071	0.954573	FALSE	FALSE
90441_34	positive_control	pool2	3.931	-0.014	0.258	0.648018	FALSE	FALSE
90441_73	positive_control	pool1	3.717	-0.083	0.064	0.960612	FALSE	FALSE
90441_73	positive_control	pool2	3.978	-0.131	-0.139	0.872632	FALSE	FALSE
90498_46	positive_control	pool1	2.957	-0.863	-0.718	0.173214	FALSE	FALSE
90498_46	positive_control	pool2	2.907	-1.06	-0.986	0.130835	FALSE	FALSE
90498_58	positive_control	pool1	3.157	-0.474	-0.224	0.837377	FALSE	FALSE
90498_58	positive_control	pool2	2.543	-0.745	-0.394	0.62982	FALSE	FALSE
95938_19	positive_control	pool1	3.49	-0.24	0.164	0.876847	FALSE	FALSE
95938_19	positive_control	pool2	3.224	-0.696	-0.543	0.286598	FALSE	FALSE
95938_30	positive_control	pool1	3.715	-0.813	-0.392	0.521502	FALSE	FALSE
95938_30	positive_control	pool2	3.416	-0.812	-0.035	0.973376	FALSE	FALSE
CCND1_12233	positive_control	pool1	3.21	-1.278	-0.903	0.0150224	TRUE	FALSE
CCND1_12233	positive_control	pool2	3.325	-0.847	-0.819	0.0236421	TRUE	FALSE
CCND1_12234	positive_control	pool1	1.843	-0.896	-1.003	0.107856	FALSE	FALSE
CCND1_12234	positive_control	pool2	1.71	-2.112	-2.368	5.01219e-08	TRUE	FALSE
CCND1_12235	positive_control	pool1	3.681	-0.979	-0.995	0.000450292	TRUE	FALSE
CCND1_12235	positive_control	pool2	3.613	-1.268	-1.02	0.0052388	TRUE	FALSE
CCND1_17025	positive_control	pool1	4.368	0.597	0.482	0.251398	FALSE	FALSE
CCND1_17025	positive_control	pool2	4.545	0.738	0.484	0.117475	FALSE	FALSE
CCND1_17026	positive_control	pool1	4.313	0.829	0.635	0.0435807	FALSE	TRUE
CCND1_17026	positive_control	pool2	4.353	0.398	0.243	0.600641	FALSE	FALSE
CCND1_17319	positive_control	pool1	4.004	-0.706	-0.295	0.631414	FALSE	FALSE
CCND1_17319	positive_control	pool2	3.513	-1.032	-0.723	0.0634506	FALSE	FALSE
CCND1_17322	positive_control	pool1	1.956	-0.483	-0.402	0.739059	FALSE	FALSE
CCND1_17322	positive_control	pool2	1.823	-0.373	0.274	0.811694	FALSE	FALSE
CCND1_17325	positive_control	pool1	3.275	-0.927	-0.606	0.262212	FALSE	FALSE
CCND1_17325	positive_control	pool2	3.357	-0.914	-0.547	0.264765	FALSE	FALSE
CCND1_17328	positive_control	pool1	1.858	-0.628	-0.117	0.955751	FALSE	FALSE
CCND1_17328	positive_control	pool2	1.898	-0.772	-0.128	0.944015	FALSE	FALSE
CCND1_17333	positive_control	pool1	3.712	-0.967	-0.494	0.361727	FALSE	FALSE
CCND1_17333	positive_control	pool2	3.176	-1.737	-1.224	8.88794e-05	TRUE	FALSE
CCND1_TAD_1	positive_control	pool1	1.886	-0.003	0.272	0.861245	FALSE	FALSE
CCND1_TAD_1	positive_control	pool2	1.545	-0.945	-0.704	0.510452	FALSE	FALSE
CCND1_TAD_5	positive_control	pool1	2.465	-0.502	-0.435	0.654058	FALSE	FALSE
CCND1_TAD_5	positive_control	pool2	3.221	0.524	0.586	0.249683	FALSE	FALSE
CCND1_TSS_1	positive_control	pool1	3.231	-1.87	-1.566	2.00881e-07	TRUE	FALSE
CCND1_TSS_1	positive_control	pool2	3.215	-1.567	-1.318	1.6567e-05	TRUE	FALSE
CCND1_TSS_10	positive_control	pool1	3.32	-0.207	-0.095	0.958966	FALSE	FALSE
CCND1_TSS_10	positive_control	pool2	3.075	-0.455	-0.339	0.653223	FALSE	FALSE
CCND1_TSS_2	positive_control	pool1	2.961	-3.179	-2.276	2.83568e-09	TRUE	FALSE
CCND1_TSS_2	positive_control	pool2	2.946	-3.05	-2.326	4.07873e-11	TRUE	FALSE
CCND1_TSS_3	positive_control	pool1	2.083	-1.792	-1.347	0.00384915	TRUE	FALSE
CCND1_TSS_3	positive_control	pool2	2.387	-1.18	-1.018	0.060946	FALSE	FALSE
CCND1_TSS_4	positive_control	pool1	3.295	-0.53	-0.488	0.536772	FALSE	FALSE
CCND1_TSS_4	positive_control	pool2	2.797	-0.593	-0.237	0.793139	FALSE	FALSE
CCND1_TSS_5	positive_control	pool1	3.264	-1.834	-1.314	1.12707e-05	TRUE	FALSE
CCND1_TSS_5	positive_control	pool2	2.699	-2.295	-1.774	3.63746e-07	TRUE	FALSE
CCND1_TSS_6	positive_control	pool1	4.07	-0.063	-0.023	0.985591	FALSE	FALSE
CCND1_TSS_6	positive_control	pool2	4.187	-0.314	-0.465	0.187473	FALSE	FALSE
CCND1_TSS_7	positive_control	pool1	3.679	-1.878	-1.574	8.6671e-11	TRUE	FALSE
CCND1_TSS_7	positive_control	pool2	3.547	-1.789	-1.512	8.63336e-08	TRUE	FALSE
CCND1_TSS_8	positive_control	pool1	3.244	-0.924	-0.8	0.075471	FALSE	FALSE
CCND1_TSS_8	positive_control	pool2	3.252	-0.936	-0.863	0.0652231	FALSE	FALSE
CCND1_TSS_9	positive_control	pool1	3.594	-1.452	-1.112	0.000195685	TRUE	FALSE
CCND1_TSS_9	positive_control	pool2	3.542	-1.641	-1.599	1.25827e-09	TRUE	FALSE
CDK6_TAD_31	positive_control	pool1	2.894	-0.159	-0.196	0.873701	FALSE	FALSE
CDK6_TAD_31	positive_control	pool2	2.956	-0.303	-0.032	0.979318	FALSE	FALSE
CDK6_TAD_8	positive_control	pool1	-1.363	-0.249	1.7	0.232595	FALSE	FALSE
CDK6_TAD_8	positive_control	pool2	-0.823	-2.791	-1.564	0.308923	FALSE	FALSE
ERE_588_1	positive_control	pool1	3.6	-0.6	-0.27	0.725972	FALSE	FALSE
ERE_588_1	positive_control	pool2	3.672	-0.653	-0.573	0.157377	FALSE	FALSE
ERE_588_2	positive_control	pool1	3.857	-0.596	-0.613	0.0906181	FALSE	FALSE
ERE_588_2	positive_control	pool2	4.036	-0.723	-0.763	0.0253856	TRUE	FALSE
ERE_588_3	positive_control	pool1	4.06	-0.15	-0.321	0.641364	FALSE	FALSE
ERE_588_3	positive_control	pool2	3.58	-0.518	-0.556	0.200875	FALSE	FALSE
ESR1_2790	positive_control	pool1	2.681	-1.775	-1.311	0.001092	TRUE	FALSE
ESR1_2790	positive_control	pool2	2.705	-1.797	-1.463	0.000964642	TRUE	FALSE
ESR1_2798	positive_control	pool1	3.481	-1.307	-0.948	0.00672747	TRUE	FALSE
ESR1_2798	positive_control	pool2	3.173	-1.835	-1.541	1.09675e-07	TRUE	FALSE
ESR1_2801	positive_control	pool1	1.452	-0.712	-0.562	0.687616	FALSE	FALSE
ESR1_2801	positive_control	pool2	1.061	-1.615	-1.596	0.0049232	TRUE	FALSE
ESR1_2803	positive_control	pool1	-0.252	-1.835	-1.046	0.467162	FALSE	FALSE
ESR1_2803	positive_control	pool2	0.085	-1.695	-0.708	0.696095	FALSE	FALSE
ESR1_2806	positive_control	pool1	2.261	-2.004	-1.375	0.00221669	TRUE	FALSE
ESR1_2806	positive_control	pool2	2.054	-2.452	-1.888	5.45111e-06	TRUE	FALSE
ESR1_2810	positive_control	pool1	2.176	-2.091	-1.871	4.09e-06	TRUE	FALSE
ESR1_2810	positive_control	pool2	2.401	-1.664	-1.455	0.00022738	TRUE	FALSE
ESR1_2811	positive_control	pool1	1.612	-2.293	-2.045	1.00173e-05	TRUE	FALSE
ESR1_2811	positive_control	pool2	1.592	-1.571	-1.414	0.0215029	TRUE	FALSE
ESR1_2813	positive_control	pool1	2.31	-1.368	-0.99	0.136478	FALSE	FALSE
ESR1_2813	positive_control	pool2	2.104	-2.052	-1.766	1.20668e-05	TRUE	FALSE
ESR1_2814	positive_control	pool1	2.201	-1.726	-1.497	0.00045145	TRUE	FALSE
ESR1_2814	positive_control	pool2	2.269	-2.202	-1.925	6.81324e-07	TRUE	FALSE
ESR1_2816	positive_control	pool1	2.175	-1.571	-1.326	0.00473106	TRUE	FALSE
ESR1_2816	positive_control	pool2	1.859	-1.831	-1.31	0.00975901	TRUE	FALSE
ESR1_6829	positive_control	pool1	-0.943	-0.469	-0.155	0.970477	FALSE	FALSE
ESR1_6829	positive_control	pool2	-1.399	-0.433	0.068	0.976947	FALSE	FALSE
ESR1_6830	positive_control	pool1	-1.399	-1.212	-0.299	0.91324	FALSE	FALSE
ESR1_6830	positive_control	pool2	-0.9	-2.894	-0.03	0.994643	FALSE	FALSE
ESR1_TAD_1	positive_control	pool1	1.329	-1.682	-1.38	0.0167853	TRUE	FALSE
ESR1_TAD_1	positive_control	pool2	1.252	-1.897	-1.537	0.010842	TRUE	FALSE
ESR1_TAD_12	positive_control	pool1	1.906	-1.227	-0.84	0.248999	FALSE	FALSE
ESR1_TAD_12	positive_control	pool2	2.106	-1.55	-1.061	0.0571946	FALSE	FALSE
ESR1_TAD_5	positive_control	pool1	3.153	-1.329	-1.005	0.0256527	TRUE	FALSE
ESR1_TAD_5	positive_control	pool2	2.982	-1.686	-1.573	5.3877e-07	TRUE	FALSE
ESR1_TAD_6	positive_control	pool1	3.342	-1.843	-1.636	1.87914e-08	TRUE	FALSE
ESR1_TAD_6	positive_control	pool2	3.255	-1.417	-1.087	0.000655658	TRUE	FALSE
ESR1_TAD_7	positive_control	pool1	3.33	-1.327	-1.043	0.00110563	TRUE	FALSE
ESR1_TAD_7	positive_control	pool2	3.109	-1.721	-1.527	1.3674e-06	TRUE	FALSE
ESR1_TSS_1	positive_control	pool1	2.365	0.136	0.933	0.472396	FALSE	FALSE
ESR1_TSS_1	positive_control	pool2	2.056	-0.219	-0.008	0.996165	FALSE	FALSE
ESR1_TSS_10	positive_control	pool1	1.065	-0.378	-0.34	0.861842	FALSE	FALSE
ESR1_TSS_10	positive_control	pool2	1.273	0.027	-0.315	0.807513	FALSE	FALSE
ESR1_TSS_11	positive_control	pool1	3.473	-1.753	-1.379	3.7868e-06	TRUE	FALSE
ESR1_TSS_11	positive_control	pool2	3.15	-1.759	-1.324	0.000103438	TRUE	FALSE
ESR1_TSS_12	positive_control	pool1	3.147	-1.179	-0.777	0.0806845	FALSE	FALSE
ESR1_TSS_12	positive_control	pool2	3.352	-1.184	-0.98	0.00191867	TRUE	FALSE
ESR1_TSS_13	positive_control	pool1	2.546	-2.37	-1.463	0.00027176	TRUE	FALSE
ESR1_TSS_13	positive_control	pool2	2.894	-2.12	-1.32	0.0023503	TRUE	FALSE
ESR1_TSS_14	positive_control	pool1	3.753	-0.373	-0.141	0.890699	FALSE	FALSE
ESR1_TSS_14	positive_control	pool2	3.994	-0.501	-0.455	0.253813	FALSE	FALSE
ESR1_TSS_15	positive_control	pool1	3.456	-1.299	-0.971	0.00237536	TRUE	FALSE
ESR1_TSS_15	positive_control	pool2	3.152	-1.996	-1.744	1.30939e-08	TRUE	FALSE
ESR1_TSS_16	positive_control	pool1	4.356	0.39	0.028	0.981724	FALSE	FALSE
ESR1_TSS_16	positive_control	pool2	4.027	0.142	0.022	0.980842	FALSE	FALSE
ESR1_TSS_17	positive_control	pool1	2.749	-1.183	-0.792	0.239538	FALSE	FALSE
ESR1_TSS_17	positive_control	pool2	2.865	-0.923	-0.516	0.407474	FALSE	FALSE
ESR1_TSS_18	positive_control	pool1	4.581	-0.049	-0.037	0.973793	FALSE	FALSE
ESR1_TSS_18	positive_control	pool2	4.795	0.05	0.002	0.997732	FALSE	FALSE
ESR1_TSS_19	positive_control	pool1	4.152	0.331	0.231	0.727322	FALSE	FALSE
ESR1_TSS_19	positive_control	pool2	3.875	0.18	0.274	0.622407	FALSE	FALSE
ESR1_TSS_2	positive_control	pool1	2.352	-0.129	0.213	0.890049	FALSE	FALSE
ESR1_TSS_2	positive_control	pool2	2.383	-0.303	-0.369	0.688676	FALSE	FALSE
ESR1_TSS_20	positive_control	pool1	3.691	-1.218	-0.921	0.00112792	TRUE	FALSE
ESR1_TSS_20	positive_control	pool2	3.375	-1.468	-1.101	0.000266616	TRUE	FALSE
ESR1_TSS_3	positive_control	pool1	2.43	-0.339	0.176	0.927077	FALSE	FALSE
ESR1_TSS_3	positive_control	pool2	2.156	-0.738	-0.334	0.732062	FALSE	FALSE
ESR1_TSS_4	positive_control	pool1	3.412	0.2	0.169	0.87244	FALSE	FALSE
ESR1_TSS_4	positive_control	pool2	3.004	-0.613	-0.547	0.338533	FALSE	FALSE
ESR1_TSS_5	positive_control	pool1	3.881	-0.066	-0.26	0.709678	FALSE	FALSE
ESR1_TSS_5	positive_control	pool2	4.155	0.247	0.02	0.981942	FALSE	FALSE
ESR1_TSS_6	positive_control	pool1	-0.932	-3.811	-1.535	0.501723	FALSE	FALSE
ESR1_TSS_6	positive_control	pool2	-0.673	-0.418	-0.402	0.818833	FALSE	FALSE
ESR1_TSS_7	positive_control	pool1	3.195	-0.486	-0.197	0.860666	FALSE	FALSE
ESR1_TSS_7	positive_control	pool2	3.52	-0.322	-0.431	0.392638	FALSE	FALSE
ESR1_TSS_8	positive_control	pool1	2.024	-0.212	0.194	0.903941	FALSE	FALSE
ESR1_TSS_8	positive_control	pool2	2.363	-0.949	-1.163	0.0112828	TRUE	FALSE
ESR1_TSS_9	positive_control	pool1	2.821	-0.401	-0.303	0.771742	FALSE	FALSE
ESR1_TSS_9	positive_control	pool2	2.347	-0.712	-0.352	0.743465	FALSE	FALSE
FOXA1_1745	positive_control	pool1	-0.368	-1.657	-1.366	0.26629	FALSE	FALSE
FOXA1_1745	positive_control	pool2	-0.388	-0.642	0.755	0.600898	FALSE	FALSE
FOXA1_1746	positive_control	pool1	-1.326	-1.756	-1.219	0.482142	FALSE	FALSE
FOXA1_1746	positive_control	pool2	-0.576	-1.203	1.259	0.531551	FALSE	FALSE
FOXA1_3663	positive_control	pool1	2.601	-0.488	0.178	0.917416	FALSE	FALSE
FOXA1_3663	positive_control	pool2	2.816	-0.976	-0.651	0.32376	FALSE	FALSE
FOXA1_3667	positive_control	pool1	2.684	-0.538	-0.168	0.91017	FALSE	FALSE
FOXA1_3667	positive_control	pool2	2.471	-1.414	-0.99	0.125053	FALSE	FALSE
FOXA1_TSS_1	positive_control	pool1	2.493	-3.334	-2.96	1.08792e-16	TRUE	FALSE
FOXA1_TSS_1	positive_control	pool2	2.371	-3.205	-2.52	1.30602e-10	TRUE	FALSE
FOXA1_TSS_10	positive_control	pool1	3.221	-0.19	-0.265	0.782106	FALSE	FALSE
FOXA1_TSS_10	positive_control	pool2	3.278	-0.621	-0.814	0.0625871	FALSE	FALSE
FOXA1_TSS_2	positive_control	pool1	2.916	-2.458	-1.85	4.52785e-09	TRUE	FALSE
FOXA1_TSS_2	positive_control	pool2	2.912	-2.11	-1.782	7.10839e-08	TRUE	FALSE
FOXA1_TSS_3	positive_control	pool1	3.474	-1.146	-0.93	0.00323448	TRUE	FALSE
FOXA1_TSS_3	positive_control	pool2	3.746	-1.079	-1.111	1.03344e-05	TRUE	FALSE
FOXA1_TSS_4	positive_control	pool1	3.187	-2.386	-1.92	4.95366e-11	TRUE	FALSE
FOXA1_TSS_4	positive_control	pool2	2.914	-2.701	-2.315	5.88023e-14	TRUE	FALSE
FOXA1_TSS_5	positive_control	pool1	3.911	-0.636	-0.273	0.744374	FALSE	FALSE
FOXA1_TSS_5	positive_control	pool2	3.855	-0.313	0.1	0.908604	FALSE	FALSE
FOXA1_TSS_6	positive_control	pool1	3.756	-0.404	-0.411	0.524039	FALSE	FALSE
FOXA1_TSS_6	positive_control	pool2	3.979	-0.118	-0.151	0.827268	FALSE	FALSE
FOXA1_TSS_7	positive_control	pool1	3.814	-0.237	0.02	0.989243	FALSE	FALSE
FOXA1_TSS_7	positive_control	pool2	3.722	-0.293	-0.38	0.454068	FALSE	FALSE
FOXA1_TSS_8	positive_control	pool1	3.323	-0.879	-0.688	0.124034	FALSE	FALSE
FOXA1_TSS_8	positive_control	pool2	3.708	0.104	0.182	0.790544	FALSE	FALSE
FOXA1_TSS_9	positive_control	pool1	3.409	-0.963	-0.572	0.319663	FALSE	FALSE
FOXA1_TSS_9	positive_control	pool2	3.447	-0.895	-0.515	0.323756	FALSE	FALSE
GATA3_10470	positive_control	pool1	2.999	-1.094	-0.702	0.187572	FALSE	FALSE
GATA3_10470	positive_control	pool2	3.097	-0.989	-0.792	0.10995	FALSE	FALSE
GATA3_10471	positive_control	pool1	3.321	-1.084	-0.936	0.00989641	TRUE	FALSE
GATA3_10471	positive_control	pool2	3.033	-1.757	-1.256	0.000273967	TRUE	FALSE
GATA3_10473	positive_control	pool1	3.157	-0.887	-0.46	0.501285	FALSE	FALSE
GATA3_10473	positive_control	pool2	2.817	-1.425	-1.235	0.00235084	TRUE	FALSE
GATA3_10477	positive_control	pool1	1.309	-1.386	-1.087	0.161946	FALSE	FALSE
GATA3_10477	positive_control	pool2	1.579	-2.132	-1.719	0.00226665	TRUE	FALSE
GATA3_10480	positive_control	pool1	1.708	-2.251	-1.737	0.000539613	TRUE	FALSE
GATA3_10480	positive_control	pool2	1.867	-2.321	-1.735	0.0142678	TRUE	FALSE
GATA3_10483	positive_control	pool1	2.863	-0.642	-0.391	0.696186	FALSE	FALSE
GATA3_10483	positive_control	pool2	2.43	-1.213	-0.845	0.16252	FALSE	FALSE
GATA3_10486	positive_control	pool1	0.95	-1.732	-1.501	0.0153651	TRUE	FALSE
GATA3_10486	positive_control	pool2	1.665	-0.455	-0.503	0.66088	FALSE	FALSE
GATA3_10488	positive_control	pool1	1.244	-0.74	-0.457	0.759881	FALSE	FALSE
GATA3_10488	positive_control	pool2	1.338	-1.91	-1.679	0.000906385	TRUE	FALSE
GATA3_10490	positive_control	pool1	0.579	-1.311	-0.842	0.43557	FALSE	FALSE
GATA3_10490	positive_control	pool2	1.165	-0.678	-0.265	0.848878	FALSE	FALSE
GATA3_10494	positive_control	pool1	1.252	-1.82	-1.274	0.0704275	FALSE	FALSE
GATA3_10494	positive_control	pool2	1.478	-1.597	-1.154	0.134996	FALSE	FALSE
GATA3_10497	positive_control	pool1	0.631	-0.635	-0.317	0.898384	FALSE	FALSE
GATA3_10497	positive_control	pool2	0.243	-2.892	-2.317	0.00055852	TRUE	FALSE
GATA3_3109	positive_control	pool1	3.712	-0.663	-0.381	0.542807	FALSE	FALSE
GATA3_3109	positive_control	pool2	3.526	-1.066	-0.695	0.0720817	FALSE	FALSE
GATA3_3110	positive_control	pool1	3.235	-0.781	-0.591	0.387174	FALSE	FALSE
GATA3_3110	positive_control	pool2	3.03	-1.123	-0.832	0.107953	FALSE	FALSE
GATA3_7976	positive_control	pool1	0.345	-0.488	-0.159	0.961625	FALSE	FALSE
GATA3_7976	positive_control	pool2	-1.008	-2.37	-0.555	0.814452	FALSE	FALSE
GATA3_7983	positive_control	pool1	2.365	-1.996	-1.577	0.00116317	TRUE	FALSE
GATA3_7983	positive_control	pool2	2.858	-2.135	-1.725	0.000111224	TRUE	FALSE
GATA3_8366	positive_control	pool1	-1.121	-1.389	-1.316	0.432457	FALSE	FALSE
GATA3_8366	positive_control	pool2	-2.026	-3.491	-1.366	0.721909	FALSE	FALSE
GATA3_8368	positive_control	pool1	2.073	-1.03	-0.747	0.402371	FALSE	FALSE
GATA3_8368	positive_control	pool2	2.085	-1.031	-0.834	0.217906	FALSE	FALSE
GATA3_TSS_1	positive_control	pool1	4.206	0.251	0.298	0.598923	FALSE	FALSE
GATA3_TSS_1	positive_control	pool2	3.844	0.09	0.269	0.63622	FALSE	FALSE
GATA3_TSS_10	positive_control	pool1	3.137	-0.04	0.222	0.838271	FALSE	FALSE
GATA3_TSS_10	positive_control	pool2	3.151	-0.127	0.02	0.987765	FALSE	FALSE
GATA3_TSS_2	positive_control	pool1	3.332	-0.458	-0.554	0.351942	FALSE	FALSE
GATA3_TSS_2	positive_control	pool2	3.098	-0.892	-0.774	0.0711146	FALSE	FALSE
GATA3_TSS_3	positive_control	pool1	3.876	0.119	0.151	0.877819	FALSE	FALSE
GATA3_TSS_3	positive_control	pool2	3.706	-0.136	0.039	0.970669	FALSE	FALSE
GATA3_TSS_4	positive_control	pool1	4.457	0.161	-0.038	0.973536	FALSE	FALSE
GATA3_TSS_4	positive_control	pool2	4.327	-0.115	-0.425	0.21491	FALSE	FALSE
GATA3_TSS_5	positive_control	pool1	3.559	-0.611	-0.372	0.705923	FALSE	FALSE
GATA3_TSS_5	positive_control	pool2	3.755	-0.594	-0.475	0.267584	FALSE	FALSE
GATA3_TSS_6	positive_control	pool1	3.287	-0.681	-0.456	0.486583	FALSE	FALSE
GATA3_TSS_6	positive_control	pool2	3.194	-0.381	-0.057	0.960099	FALSE	FALSE
GATA3_TSS_7	positive_control	pool1	4.387	-0.078	-0.174	0.801161	FALSE	FALSE
GATA3_TSS_7	positive_control	pool2	4.221	-0.096	-0.199	0.712213	FALSE	FALSE
GATA3_TSS_8	positive_control	pool1	3.82	0.02	-0.265	0.745296	FALSE	FALSE
GATA3_TSS_8	positive_control	pool2	3.845	0.247	0.152	0.869001	FALSE	FALSE
GATA3_TSS_9	positive_control	pool1	3.611	-0.113	0.031	0.983061	FALSE	FALSE
GATA3_TSS_9	positive_control	pool2	3.364	-0.575	-0.318	0.652032	FALSE	FALSE
Myc_TAD_110	positive_control	pool1	3.345	-0.758	-0.278	0.758787	FALSE	FALSE
Myc_TAD_110	positive_control	pool2	2.846	-0.883	-0.381	0.636579	FALSE	FALSE
Myc_TAD_111	positive_control	pool1	3.309	-0.684	0.054	0.975615	FALSE	FALSE
Myc_TAD_111	positive_control	pool2	3.117	-0.893	-0.397	0.572451	FALSE	FALSE
Myc_TAD_48	positive_control	pool1	2.837	-0.33	0.068	0.971473	FALSE	FALSE
Myc_TAD_48	positive_control	pool2	3.184	0.024	0.144	0.876559	FALSE	FALSE
non-targeting_00000	non-targeting	pool1	4.479	0.099	-0.076	0.936047	FALSE	FALSE
non-targeting_00000	non-targeting	pool2	4.514	0.403	0.246	0.62331	FALSE	FALSE
non-targeting_00001	non-targeting	pool1	3.504	-0.149	-0.004	0.997777	FALSE	FALSE
non-targeting_00001	non-targeting	pool2	3.373	0.036	0.064	0.949428	FALSE	FALSE
non-targeting_00002	non-targeting	pool1	4.178	-0.028	0.011	0.993339	FALSE	FALSE
non-targeting_00002	non-targeting	pool2	4.481	0.144	0.127	0.848878	FALSE	FALSE
non-targeting_00003	non-targeting	pool1	4.404	-0.046	-0.186	0.792724	FALSE	FALSE
non-targeting_00003	non-targeting	pool2	4.293	-0.062	-0.156	0.786521	FALSE	FALSE
non-targeting_00004	non-targeting	pool1	2.962	0.147	0.167	0.900536	FALSE	FALSE
non-targeting_00004	non-targeting	pool2	3.305	0.047	-0.004	0.996581	FALSE	FALSE
non-targeting_00005	non-targeting	pool1	3.749	0.074	0.134	0.904007	FALSE	FALSE
non-targeting_00005	non-targeting	pool2	3.867	0.423	0.465	0.400524	FALSE	FALSE
non-targeting_00006	non-targeting	pool1	3.807	-0.266	-0.323	0.611916	FALSE	FALSE
non-targeting_00006	non-targeting	pool2	3.902	0.257	0.235	0.688074	FALSE	FALSE
non-targeting_00007	non-targeting	pool1	4	-0.105	0.012	0.994366	FALSE	FALSE
non-targeting_00007	non-targeting	pool2	3.516	-0.658	-0.465	0.399698	FALSE	FALSE
non-targeting_00008	non-targeting	pool1	2.67	0.443	0.466	0.612801	FALSE	FALSE
non-targeting_00008	non-targeting	pool2	2.454	-0.456	-0.628	0.389668	FALSE	FALSE
non-targeting_00009	non-targeting	pool1	3.123	-0.425	-0.443	0.549485	FALSE	FALSE
non-targeting_00009	non-targeting	pool2	3.678	0.049	-0.267	0.692958	FALSE	FALSE
non-targeting_00010	non-targeting	pool1	3.675	-0.374	-0.172	0.860198	FALSE	FALSE
non-targeting_00010	non-targeting	pool2	3.77	-0.117	-0.243	0.732168	FALSE	FALSE
non-targeting_00011	non-targeting	pool1	4.464	0.319	0.099	0.91324	FALSE	FALSE
non-targeting_00011	non-targeting	pool2	4.32	0.606	0.436	0.202568	FALSE	FALSE
non-targeting_00012	non-targeting	pool1	3.836	0.007	-0.003	0.998308	FALSE	FALSE
non-targeting_00012	non-targeting	pool2	4.224	0.125	0.017	0.98286	FALSE	FALSE
non-targeting_00013	non-targeting	pool1	3.16	-0.128	0.186	0.868986	FALSE	FALSE
non-targeting_00013	non-targeting	pool2	3.216	-0.471	-0.296	0.721898	FALSE	FALSE
non-targeting_00014	non-targeting	pool1	4.115	0.016	0.341	0.542829	FALSE	FALSE
non-targeting_00014	non-targeting	pool2	4.293	0.118	-0.083	0.91748	FALSE	FALSE
non-targeting_00015	non-targeting	pool1	4.129	0.31	0.364	0.472396	FALSE	FALSE
non-targeting_00015	non-targeting	pool2	3.824	-0.11	-0.014	0.988895	FALSE	FALSE
non-targeting_00016	non-targeting	pool1	3.427	-0.407	-0.225	0.83878	FALSE	FALSE
non-targeting_00016	non-targeting	pool2	3.456	-0.285	-0.065	0.948651	FALSE	FALSE
non-targeting_00017	non-targeting	pool1	4	0.041	-0.289	0.678346	FALSE	FALSE
non-targeting_00017	non-targeting	pool2	3.72	0.13	0.029	0.977761	FALSE	FALSE
non-targeting_00018	non-targeting	pool1	4.395	0.308	0.028	0.981805	FALSE	FALSE
non-targeting_00018	non-targeting	pool2	4.089	0.451	0.283	0.577398	FALSE	FALSE
non-targeting_00019	non-targeting	pool1	2.883	-0.91	-0.658	0.326685	FALSE	FALSE
non-targeting_00019	non-targeting	pool2	2.905	-0.957	-0.583	0.484222	FALSE	FALSE
non-targeting_00020	non-targeting	pool1	4.228	-0.078	-0.093	0.922712	FALSE	FALSE
non-targeting_00020	non-targeting	pool2	3.846	-0.249	-0.264	0.676831	FALSE	FALSE
non-targeting_00021	non-targeting	pool1	4.431	0.471	0.185	0.776555	FALSE	FALSE
non-targeting_00021	non-targeting	pool2	4.151	0.245	0.062	0.941126	FALSE	FALSE
non-targeting_00022	non-targeting	pool1	3.79	-0.303	-0.247	0.744374	FALSE	FALSE
non-targeting_00022	non-targeting	pool2	3.706	-0.366	-0.25	0.679276	FALSE	FALSE
non-targeting_00023	non-targeting	pool1	3.361	-0.259	-0.213	0.83783	FALSE	FALSE
non-targeting_00023	non-targeting	pool2	3.079	-0.59	-0.364	0.584672	FALSE	FALSE
non-targeting_00024	non-targeting	pool1	3.958	-0.175	-0.015	0.992584	FALSE	FALSE
non-targeting_00024	non-targeting	pool2	4.344	0.348	0.339	0.541966	FALSE	FALSE
non-targeting_00025	non-targeting	pool1	3.42	-0.052	-0.011	0.995043	FALSE	FALSE
non-targeting_00025	non-targeting	pool2	3.213	-0.194	0.036	0.977937	FALSE	FALSE
non-targeting_00026	non-targeting	pool1	3.087	0.444	0.349	0.698558	FALSE	FALSE
non-targeting_00026	non-targeting	pool2	2.977	-0.075	0.009	0.994432	FALSE	FALSE
non-targeting_00027	non-targeting	pool1	4.138	0.272	0.159	0.851196	FALSE	FALSE
non-targeting_00027	non-targeting	pool2	3.948	0.117	-0.13	0.856312	FALSE	FALSE
non-targeting_00028	non-targeting	pool1	3.45	0.382	0.265	0.752139	FALSE	FALSE
non-targeting_00028	non-targeting	pool2	3.188	0.02	-0.033	0.97774	FALSE	FALSE
non-targeting_00029	non-targeting	pool1	2.816	-0.365	-0.162	0.907475	FALSE	FALSE
non-targeting_00029	non-targeting	pool2	2.985	-0.117	-0.234	0.781377	FALSE	FALSE
non-targeting_00030	non-targeting	pool1	4.133	0.196	0.096	0.932555	FALSE	FALSE
non-targeting_00030	non-targeting	pool2	4.357	0.353	0.13	0.830117	FALSE	FALSE
non-targeting_00031	non-targeting	pool1	3.871	-0.101	-0.021	0.988632	FALSE	FALSE
non-targeting_00031	non-targeting	pool2	3.798	0.066	-0.012	0.990549	FALSE	FALSE
non-targeting_00032	non-targeting	pool1	4.491	-0.277	-0.107	0.897634	FALSE	FALSE
non-targeting_00032	non-targeting	pool2	3.982	-0.515	-0.384	0.480279	FALSE	FALSE
non-targeting_00033	non-targeting	pool1	3.586	-0.11	-0.228	0.787289	FALSE	FALSE
non-targeting_00033	non-targeting	pool2	3.445	-0.146	-0.003	0.997793	FALSE	FALSE
non-targeting_00034	non-targeting	pool1	3.792	-0.048	-0.094	0.932102	FALSE	FALSE
non-targeting_00034	non-targeting	pool2	3.912	0.211	0	0.99943	FALSE	FALSE
non-targeting_00035	non-targeting	pool1	3.972	-0.156	-0.128	0.891847	FALSE	FALSE
non-targeting_00035	non-targeting	pool2	4.052	-0.034	0.006	0.994542	FALSE	FALSE
non-targeting_00036	non-targeting	pool1	3.701	-0.541	-0.374	0.530776	FALSE	FALSE
non-targeting_00036	non-targeting	pool2	3.279	-0.637	-0.345	0.64727	FALSE	FALSE
non-targeting_00037	non-targeting	pool1	3.747	-0.004	-0.028	0.983878	FALSE	FALSE
non-targeting_00037	non-targeting	pool2	4.322	0.647	0.481	0.193969	FALSE	FALSE
non-targeting_00038	non-targeting	pool1	3.388	-0.074	0.118	0.932395	FALSE	FALSE
non-targeting_00038	non-targeting	pool2	3.296	-0.805	-0.506	0.414407	FALSE	FALSE
non-targeting_00039	non-targeting	pool1	4.23	-0.24	-0.218	0.758253	FALSE	FALSE
non-targeting_00039	non-targeting	pool2	3.545	-0.764	-0.522	0.321476	FALSE	FALSE
non-targeting_00040	non-targeting	pool1	3.669	0.016	0.252	0.761889	FALSE	FALSE
non-targeting_00040	non-targeting	pool2	3.671	-0.236	-0.205	0.759304	FALSE	FALSE
non-targeting_00041	non-targeting	pool1	3.877	-0.272	-0.013	0.992925	FALSE	FALSE
non-targeting_00041	non-targeting	pool2	4.099	0.208	0.008	0.993709	FALSE	FALSE
non-targeting_00042	non-targeting	pool1	3.18	-0.871	-0.698	0.212239	FALSE	FALSE
non-targeting_00042	non-targeting	pool2	4.051	0.431	0.584	0.0821218	FALSE	FALSE
non-targeting_00043	non-targeting	pool1	4.138	-0.052	0.161	0.84999	FALSE	FALSE
non-targeting_00043	non-targeting	pool2	3.905	-0.314	-0.17	0.808432	FALSE	FALSE
non-targeting_00044	non-targeting	pool1	4.319	0.251	0.285	0.597695	FALSE	FALSE
non-targeting_00044	non-targeting	pool2	4.139	0.205	0.073	0.924525	FALSE	FALSE
non-targeting_00045	non-targeting	pool1	3.775	0.008	-0.177	0.855027	FALSE	FALSE
non-targeting_00045	non-targeting	pool2	3.93	0.348	0.375	0.448971	FALSE	FALSE
non-targeting_00046	non-targeting	pool1	4.313	-0.335	-0.307	0.544815	FALSE	FALSE
non-targeting_00046	non-targeting	pool2	4.523	-0.041	0.067	0.921093	FALSE	FALSE
non-targeting_00047	non-targeting	pool1	3.908	-0.365	-0.25	0.791743	FALSE	FALSE
non-targeting_00047	non-targeting	pool2	3.811	0.112	0.14	0.854967	FALSE	FALSE
non-targeting_00048	non-targeting	pool1	3.583	0.416	0.449	0.457488	FALSE	FALSE
non-targeting_00048	non-targeting	pool2	3.48	0.182	0.158	0.854088	FALSE	FALSE
non-targeting_00049	non-targeting	pool1	3.962	0.253	-0.157	0.873701	FALSE	FALSE
non-targeting_00049	non-targeting	pool2	3.503	-0.046	-0.347	0.558303	FALSE	FALSE
non-targeting_00050	non-targeting	pool1	2.8	0.225	0.242	0.863808	FALSE	FALSE
non-targeting_00050	non-targeting	pool2	3.063	0.36	0.071	0.952291	FALSE	FALSE
non-targeting_00051	non-targeting	pool1	3.249	-0.065	-0.154	0.90692	FALSE	FALSE
non-targeting_00051	non-targeting	pool2	3.217	-0.142	0.06	0.956681	FALSE	FALSE
non-targeting_00052	non-targeting	pool1	4.024	0.325	0.178	0.864985	FALSE	FALSE
non-targeting_00052	non-targeting	pool2	3.887	0.166	0.08	0.93244	FALSE	FALSE
non-targeting_00053	non-targeting	pool1	3.626	-0.139	0.059	0.967195	FALSE	FALSE
non-targeting_00053	non-targeting	pool2	3.387	-0.398	0.038	0.970971	FALSE	FALSE
non-targeting_00054	non-targeting	pool1	3.911	0.388	-0.025	0.989184	FALSE	FALSE
non-targeting_00054	non-targeting	pool2	3.463	-0.161	-0.226	0.811897	FALSE	FALSE
non-targeting_00055	non-targeting	pool1	3.947	-0.204	0.031	0.981773	FALSE	FALSE
non-targeting_00055	non-targeting	pool2	4.062	-0.169	-0.06	0.944306	FALSE	FALSE
non-targeting_00056	non-targeting	pool1	3.959	-0.49	-0.552	0.166689	FALSE	FALSE
non-targeting_00056	non-targeting	pool2	3.866	-0.032	0.007	0.994716	FALSE	FALSE
non-targeting_00057	non-targeting	pool1	3.513	-0.289	-0.116	0.921831	FALSE	FALSE
non-targeting_00057	non-targeting	pool2	3.811	-0.217	-0.167	0.81722	FALSE	FALSE
non-targeting_00058	non-targeting	pool1	3.713	0.202	0.262	0.724159	FALSE	FALSE
non-targeting_00058	non-targeting	pool2	3.941	-0.08	-0.073	0.939496	FALSE	FALSE
non-targeting_00059	non-targeting	pool1	3.69	-0.311	-0.147	0.884084	FALSE	FALSE
non-targeting_00059	non-targeting	pool2	3.884	-0.276	-0.209	0.752411	FALSE	FALSE
non-targeting_00060	non-targeting	pool1	3.68	-0.102	-0.082	0.947861	FALSE	FALSE
non-targeting_00060	non-targeting	pool2	3.418	-0.204	-0.104	0.91247	FALSE	FALSE
non-targeting_00061	non-targeting	pool1	3.298	-0.145	0.139	0.917352	FALSE	FALSE
non-targeting_00061	non-targeting	pool2	2.972	-0.825	-0.619	0.281037	FALSE	FALSE
non-targeting_00062	non-targeting	pool1	3.984	0.288	0.442	0.328173	FALSE	FALSE
non-targeting_00062	non-targeting	pool2	3.869	0.171	0.078	0.925948	FALSE	FALSE
non-targeting_00063	non-targeting	pool1	3.79	0.106	0.045	0.974555	FALSE	FALSE
non-targeting_00063	non-targeting	pool2	3.937	-0.14	-0.096	0.899195	FALSE	FALSE
non-targeting_00064	non-targeting	pool1	3.634	-0.15	0.016	0.992469	FALSE	FALSE
non-targeting_00064	non-targeting	pool2	3.649	-0.267	-0.112	0.889301	FALSE	FALSE
non-targeting_00065	non-targeting	pool1	3.73	-0.185	-0.246	0.756313	FALSE	FALSE
non-targeting_00065	non-targeting	pool2	4.087	0.151	0.106	0.88662	FALSE	FALSE
non-targeting_00066	non-targeting	pool1	3.652	-0.187	-0.195	0.856423	FALSE	FALSE
non-targeting_00066	non-targeting	pool2	3.826	-0.176	-0.029	0.978472	FALSE	FALSE
non-targeting_00067	non-targeting	pool1	3.652	-0.224	-0.113	0.932102	FALSE	FALSE
non-targeting_00067	non-targeting	pool2	3.701	-0.133	-0.142	0.866928	FALSE	FALSE
non-targeting_00068	non-targeting	pool1	4.738	0.322	0.183	0.804446	FALSE	FALSE
non-targeting_00068	non-targeting	pool2	4.735	0.141	-0.032	0.967235	FALSE	FALSE
non-targeting_00069	non-targeting	pool1	3.493	-0.34	-0.155	0.888879	FALSE	FALSE
non-targeting_00069	non-targeting	pool2	3.408	-0.771	-0.425	0.492834	FALSE	FALSE
non-targeting_00070	non-targeting	pool1	3.529	0.219	0.28	0.784934	FALSE	FALSE
non-targeting_00070	non-targeting	pool2	3.4	0.017	-0.224	0.756545	FALSE	FALSE
non-targeting_00071	non-targeting	pool1	4.619	0.076	0.078	0.934756	FALSE	FALSE
non-targeting_00071	non-targeting	pool2	4.393	0.005	-0.014	0.986083	FALSE	FALSE
non-targeting_00072	non-targeting	pool1	3.014	0.097	0.353	0.71279	FALSE	FALSE
non-targeting_00072	non-targeting	pool2	2.839	-0.241	-0.04	0.979793	FALSE	FALSE
non-targeting_00073	non-targeting	pool1	3.867	-0.005	-0.309	0.628485	FALSE	FALSE
non-targeting_00073	non-targeting	pool2	3.775	0.164	0.109	0.889809	FALSE	FALSE
non-targeting_00074	non-targeting	pool1	3.952	0.29	0.034	0.980169	FALSE	FALSE
non-targeting_00074	non-targeting	pool2	3.759	0.172	-0.097	0.915296	FALSE	FALSE
non-targeting_00075	non-targeting	pool1	3.316	0.038	0.058	0.97161	FALSE	FALSE
non-targeting_00075	non-targeting	pool2	3.315	-0.274	-0.145	0.870503	FALSE	FALSE
non-targeting_00076	non-targeting	pool1	3.685	-0.008	-0.082	0.958091	FALSE	FALSE
non-targeting_00076	non-targeting	pool2	3.791	0.11	-0.064	0.955498	FALSE	FALSE
non-targeting_00077	non-targeting	pool1	3.017	-0.212	-0.129	0.925979	FALSE	FALSE
non-targeting_00077	non-targeting	pool2	2.609	-0.576	-0.402	0.623761	FALSE	FALSE
non-targeting_00078	non-targeting	pool1	4.363	0.243	0.346	0.450421	FALSE	FALSE
non-targeting_00078	non-targeting	pool2	4.357	0.21	0.215	0.664511	FALSE	FALSE
non-targeting_00079	non-targeting	pool1	2.426	-0.328	-0.376	0.770172	FALSE	FALSE
non-targeting_00079	non-targeting	pool2	2.81	0.496	0.463	0.544864	FALSE	FALSE
non-targeting_00080	non-targeting	pool1	4.389	0.13	0.062	0.95276	FALSE	FALSE
non-targeting_00080	non-targeting	pool2	4.137	0.019	-0.197	0.735813	FALSE	FALSE
non-targeting_00081	non-targeting	pool1	3.835	-0.02	0.159	0.880953	FALSE	FALSE
non-targeting_00081	non-targeting	pool2	3.589	-0.056	0.258	0.686146	FALSE	FALSE
non-targeting_00082	non-targeting	pool1	3.739	-0.278	-0.381	0.504638	FALSE	FALSE
non-targeting_00082	non-targeting	pool2	4.056	0.002	0.086	0.918578	FALSE	FALSE
non-targeting_00083	non-targeting	pool1	4.279	0.032	-0.103	0.913568	FALSE	FALSE
non-targeting_00083	non-targeting	pool2	4.017	0.026	-0.243	0.650263	FALSE	FALSE
non-targeting_00084	non-targeting	pool1	4.297	0.14	0.054	0.966757	FALSE	FALSE
non-targeting_00084	non-targeting	pool2	4.134	0.242	0.237	0.65536	FALSE	FALSE
non-targeting_00085	non-targeting	pool1	4.015	-0.113	0.044	0.971812	FALSE	FALSE
non-targeting_00085	non-targeting	pool2	3.952	-0.33	-0.255	0.63849	FALSE	FALSE
non-targeting_00086	non-targeting	pool1	4.536	0.391	0.212	0.732009	FALSE	FALSE
non-targeting_00086	non-targeting	pool2	4.818	0.373	0.025	0.975849	FALSE	FALSE
non-targeting_00087	non-targeting	pool1	3.627	-0.823	-0.464	0.443901	FALSE	FALSE
non-targeting_00087	non-targeting	pool2	3.823	-0.573	-0.192	0.776375	FALSE	FALSE
non-targeting_00088	non-targeting	pool1	3.8	-0.099	0.109	0.920365	FALSE	FALSE
non-targeting_00088	non-targeting	pool2	3.811	0.043	0.059	0.947475	FALSE	FALSE
non-targeting_00089	non-targeting	pool1	3.012	0.041	0.125	0.927508	FALSE	FALSE
non-targeting_00089	non-targeting	pool2	3.152	0.282	0.04	0.972101	FALSE	FALSE
non-targeting_00090	non-targeting	pool1	3.438	0.222	0.513	0.356398	FALSE	FALSE
non-targeting_00090	non-targeting	pool2	3.144	-0.469	-0.276	0.720063	FALSE	FALSE
non-targeting_00091	non-targeting	pool1	3.781	-0.504	-0.416	0.438176	FALSE	FALSE
non-targeting_00091	non-targeting	pool2	3.848	-0.055	-0.061	0.944255	FALSE	FALSE
non-targeting_00092	non-targeting	pool1	3.057	0.309	0.234	0.831981	FALSE	FALSE
non-targeting_00092	non-targeting	pool2	3.123	0.226	0.297	0.690791	FALSE	FALSE
non-targeting_00093	non-targeting	pool1	3.574	0.609	0.542	0.368502	FALSE	FALSE
non-targeting_00093	non-targeting	pool2	3.28	0.44	0.167	0.853141	FALSE	FALSE
non-targeting_00094	non-targeting	pool1	3.935	-0.12	-0.118	0.904942	FALSE	FALSE
non-targeting_00094	non-targeting	pool2	3.813	-0.133	0.02	0.983204	FALSE	FALSE
non-targeting_00095	non-targeting	pool1	3.62	0.107	-0.021	0.989484	FALSE	FALSE
non-targeting_00095	non-targeting	pool2	3.338	0.056	0.016	0.988914	FALSE	FALSE
non-targeting_00096	non-targeting	pool1	3.953	-0.316	-0.328	0.621598	FALSE	FALSE
non-targeting_00096	non-targeting	pool2	3.565	-0.151	0.047	0.965536	FALSE	FALSE
non-targeting_00097	non-targeting	pool1	3.768	0.584	0.579	0.154651	FALSE	FALSE
non-targeting_00097	non-targeting	pool2	3.398	0.084	0.267	0.695659	FALSE	FALSE
non-targeting_00098	non-targeting	pool1	4.167	0.229	-0.034	0.97914	FALSE	FALSE
non-targeting_00098	non-targeting	pool2	4.304	0.136	-0.101	0.883042	FALSE	FALSE
non-targeting_00099	non-targeting	pool1	3.975	-0.058	0.056	0.964863	FALSE	FALSE
non-targeting_00099	non-targeting	pool2	4.085	-0.057	-0.035	0.970602	FALSE	FALSE
non-targeting_00100	non-targeting	pool1	3.154	-0.67	-0.603	0.303364	FALSE	FALSE
non-targeting_00100	non-targeting	pool2	3.117	-0.126	0.033	0.979428	FALSE	FALSE
non-targeting_00101	non-targeting	pool1	4.2	-0.234	-0.176	0.811989	FALSE	FALSE
non-targeting_00101	non-targeting	pool2	4.058	-0.014	0.1	0.890757	FALSE	FALSE
non-targeting_00102	non-targeting	pool1	4.358	0.208	0.315	0.543498	FALSE	FALSE
non-targeting_00102	non-targeting	pool2	3.896	-0.214	-0.076	0.934374	FALSE	FALSE
non-targeting_00103	non-targeting	pool1	4.038	-0.348	-0.151	0.870047	FALSE	FALSE
non-targeting_00103	non-targeting	pool2	3.884	-0.516	-0.312	0.548635	FALSE	FALSE
non-targeting_00104	non-targeting	pool1	3.156	-0.124	0.142	0.91033	FALSE	FALSE
non-targeting_00104	non-targeting	pool2	3.781	0.255	0.206	0.759373	FALSE	FALSE
non-targeting_00105	non-targeting	pool1	3.022	-0.397	-0.338	0.755822	FALSE	FALSE
non-targeting_00105	non-targeting	pool2	2.94	-0.113	0.05	0.973913	FALSE	FALSE
non-targeting_00106	non-targeting	pool1	4.81	-0.021	-0.218	0.703547	FALSE	FALSE
non-targeting_00106	non-targeting	pool2	4.558	-0.075	-0.312	0.415821	FALSE	FALSE
non-targeting_00107	non-targeting	pool1	3.792	-0.056	-0.255	0.723621	FALSE	FALSE
non-targeting_00107	non-targeting	pool2	3.74	0.09	0.025	0.978895	FALSE	FALSE
non-targeting_00108	non-targeting	pool1	3.27	0.555	0.286	0.767072	FALSE	FALSE
non-targeting_00108	non-targeting	pool2	3.347	0.391	0.352	0.592606	FALSE	FALSE
non-targeting_00109	non-targeting	pool1	3.318	-0.223	-0.341	0.65921	FALSE	FALSE
non-targeting_00109	non-targeting	pool2	2.892	-0.141	0.017	0.989664	FALSE	FALSE
non-targeting_00110	non-targeting	pool1	3.611	-0.409	-0.304	0.681496	FALSE	FALSE
non-targeting_00110	non-targeting	pool2	3.518	-0.543	-0.285	0.646031	FALSE	FALSE
non-targeting_00111	non-targeting	pool1	3.735	-0.374	-0.255	0.780822	FALSE	FALSE
non-targeting_00111	non-targeting	pool2	3.76	-0.422	-0.25	0.713308	FALSE	FALSE
non-targeting_00112	non-targeting	pool1	2.651	-0.605	-0.333	0.763946	FALSE	FALSE
non-targeting_00112	non-targeting	pool2	2.928	-0.495	-0.14	0.896078	FALSE	FALSE
non-targeting_00113	non-targeting	pool1	4.06	0.026	-0.026	0.98369	FALSE	FALSE
non-targeting_00113	non-targeting	pool2	4.138	0	0.069	0.939451	FALSE	FALSE
non-targeting_00114	non-targeting	pool1	4.483	-0.045	-0.045	0.969224	FALSE	FALSE
non-targeting_00114	non-targeting	pool2	3.733	-0.498	-0.346	0.589718	FALSE	FALSE
non-targeting_00115	non-targeting	pool1	3.637	0.053	0.105	0.930824	FALSE	FALSE
non-targeting_00115	non-targeting	pool2	3.402	-0.022	0.159	0.846102	FALSE	FALSE
non-targeting_00116	non-targeting	pool1	3.989	0.066	0.04	0.97546	FALSE	FALSE
non-targeting_00116	non-targeting	pool2	3.995	0.17	0.123	0.887877	FALSE	FALSE
non-targeting_00117	non-targeting	pool1	3.376	0.551	0.216	0.826304	FALSE	FALSE
non-targeting_00117	non-targeting	pool2	3.042	0.172	0.071	0.949038	FALSE	FALSE
non-targeting_00118	non-targeting	pool1	3.304	-0.503	-0.184	0.864985	FALSE	FALSE
non-targeting_00118	non-targeting	pool2	3.734	-0.391	-0.252	0.672044	FALSE	FALSE
non-targeting_00119	non-targeting	pool1	3.894	-0.089	0.063	0.960288	FALSE	FALSE
non-targeting_00119	non-targeting	pool2	3.922	-0.133	0.028	0.977647	FALSE	FALSE
non-targeting_00120	non-targeting	pool1	4.276	0.12	-0.002	0.998984	FALSE	FALSE
non-targeting_00120	non-targeting	pool2	4.006	0.029	0.047	0.961548	FALSE	FALSE
non-targeting_00121	non-targeting	pool1	3.896	0.148	0.136	0.889532	FALSE	FALSE
non-targeting_00121	non-targeting	pool2	3.394	-0.517	-0.38	0.529587	FALSE	FALSE
non-targeting_00122	non-targeting	pool1	2.888	-0.287	-0.032	0.986838	FALSE	FALSE
non-targeting_00122	non-targeting	pool2	3.245	0.001	-0.077	0.946721	FALSE	FALSE
non-targeting_00123	non-targeting	pool1	2.785	-0.277	-0.049	0.980169	FALSE	FALSE
non-targeting_00123	non-targeting	pool2	2.409	-0.673	-0.519	0.497993	FALSE	FALSE
non-targeting_00124	non-targeting	pool1	3.61	-0.487	-0.484	0.420088	FALSE	FALSE
non-targeting_00124	non-targeting	pool2	3.612	-0.254	-0.036	0.97273	FALSE	FALSE
non-targeting_00125	non-targeting	pool1	4.114	0.43	0.289	0.658979	FALSE	FALSE
non-targeting_00125	non-targeting	pool2	4.034	0.268	0.286	0.601482	FALSE	FALSE
non-targeting_00126	non-targeting	pool1	2.305	0.219	0.028	0.990351	FALSE	FALSE
non-targeting_00126	non-targeting	pool2	2.293	0.09	-0.198	0.868367	FALSE	FALSE
non-targeting_00127	non-targeting	pool1	2.839	-0.085	-0.114	0.959592	FALSE	FALSE
non-targeting_00127	non-targeting	pool2	2.359	-0.694	-0.543	0.473082	FALSE	FALSE
non-targeting_00128	non-targeting	pool1	3.929	-0.332	-0.151	0.867565	FALSE	FALSE
non-targeting_00128	non-targeting	pool2	4.032	0.034	0.191	0.744768	FALSE	FALSE
non-targeting_00129	non-targeting	pool1	3.575	-0.677	-0.57	0.210793	FALSE	FALSE
non-targeting_00129	non-targeting	pool2	3.524	-0.173	0.277	0.662056	FALSE	FALSE
non-targeting_00130	non-targeting	pool1	3.67	0.049	-0.008	0.99589	FALSE	FALSE
non-targeting_00130	non-targeting	pool2	3.874	0.217	0.037	0.969077	FALSE	FALSE
non-targeting_00131	non-targeting	pool1	3.566	-0.475	-0.128	0.909896	FALSE	FALSE
non-targeting_00131	non-targeting	pool2	3.72	-0.115	0.01	0.993018	FALSE	FALSE
non-targeting_00132	non-targeting	pool1	4.576	-0.002	0.035	0.975453	FALSE	FALSE
non-targeting_00132	non-targeting	pool2	4.304	-0.161	-0.191	0.720825	FALSE	FALSE
non-targeting_00133	non-targeting	pool1	3.952	0.235	0.189	0.856937	FALSE	FALSE
non-targeting_00133	non-targeting	pool2	3.786	-0.11	0.011	0.992271	FALSE	FALSE
non-targeting_00134	non-targeting	pool1	0.988	-0.266	-0.184	0.928922	FALSE	FALSE
non-targeting_00134	non-targeting	pool2	0.559	-0.366	-0.368	0.820907	FALSE	FALSE
non-targeting_00135	non-targeting	pool1	4.265	0.402	0.398	0.414921	FALSE	FALSE
non-targeting_00135	non-targeting	pool2	4.045	-0.035	-0.241	0.689798	FALSE	FALSE
non-targeting_00136	non-targeting	pool1	3.507	-0.479	-0.129	0.912882	FALSE	FALSE
non-targeting_00136	non-targeting	pool2	3.417	-0.642	-0.565	0.21322	FALSE	FALSE
non-targeting_00137	non-targeting	pool1	3.743	-0.08	-0.091	0.944617	FALSE	FALSE
non-targeting_00137	non-targeting	pool2	3.859	0.101	0.129	0.888077	FALSE	FALSE
non-targeting_00138	non-targeting	pool1	3.119	-0.409	-0.393	0.64465	FALSE	FALSE
non-targeting_00138	non-targeting	pool2	3.48	-0.108	0.095	0.919403	FALSE	FALSE
non-targeting_00139	non-targeting	pool1	4.827	0.11	0.135	0.850901	FALSE	FALSE
non-targeting_00139	non-targeting	pool2	4.648	0.076	-0.015	0.98648	FALSE	FALSE
non-targeting_00140	non-targeting	pool1	3.827	0.213	0.166	0.868505	FALSE	FALSE
non-targeting_00140	non-targeting	pool2	4.177	0.693	0.558	0.08379	FALSE	FALSE
non-targeting_00141	non-targeting	pool1	3.73	-0.242	-0.252	0.737207	FALSE	FALSE
non-targeting_00141	non-targeting	pool2	3.99	-0.089	-0.146	0.833439	FALSE	FALSE
non-targeting_00142	non-targeting	pool1	4.021	0.228	0.15	0.900884	FALSE	FALSE
non-targeting_00142	non-targeting	pool2	4.203	0.462	0.214	0.691494	FALSE	FALSE
non-targeting_00143	non-targeting	pool1	3.995	-0.007	0.148	0.866408	FALSE	FALSE
non-targeting_00143	non-targeting	pool2	4.092	0.317	0.1	0.901379	FALSE	FALSE
non-targeting_00144	non-targeting	pool1	4.016	0.319	0.247	0.720383	FALSE	FALSE
non-targeting_00144	non-targeting	pool2	3.96	-0.058	-0.171	0.839765	FALSE	FALSE
non-targeting_00145	non-targeting	pool1	4.255	0.18	0.148	0.862815	FALSE	FALSE
non-targeting_00145	non-targeting	pool2	4.118	-0.042	-0.047	0.956651	FALSE	FALSE
non-targeting_00146	non-targeting	pool1	3.641	-0.023	0.057	0.966858	FALSE	FALSE
non-targeting_00146	non-targeting	pool2	3.336	0.022	0.099	0.928077	FALSE	FALSE
non-targeting_00147	non-targeting	pool1	3.279	-0.245	-0.233	0.817588	FALSE	FALSE
non-targeting_00147	non-targeting	pool2	3.034	-0.258	-0.422	0.535748	FALSE	FALSE
non-targeting_00148	non-targeting	pool1	2.791	-0.005	0.027	0.989243	FALSE	FALSE
non-targeting_00148	non-targeting	pool2	2.783	0.158	0.259	0.772928	FALSE	FALSE
non-targeting_00149	non-targeting	pool1	3.789	0.082	0.347	0.582927	FALSE	FALSE
non-targeting_00149	non-targeting	pool2	3.74	-0.279	-0.198	0.7635	FALSE	FALSE
non-targeting_00150	non-targeting	pool1	3.229	0.143	-0.031	0.985328	FALSE	FALSE
non-targeting_00150	non-targeting	pool2	3.464	0.295	0.217	0.758697	FALSE	FALSE
non-targeting_00151	non-targeting	pool1	3.847	0.187	0.231	0.78751	FALSE	FALSE
non-targeting_00151	non-targeting	pool2	3.74	-0.156	-0.103	0.898104	FALSE	FALSE
non-targeting_00152	non-targeting	pool1	3.042	0.139	0.266	0.801931	FALSE	FALSE
non-targeting_00152	non-targeting	pool2	3.242	-0.286	0.042	0.969988	FALSE	FALSE
non-targeting_00153	non-targeting	pool1	2.542	0.242	0.183	0.898655	FALSE	FALSE
non-targeting_00153	non-targeting	pool2	2.771	0.701	0.675	0.414407	FALSE	FALSE
non-targeting_00154	non-targeting	pool1	3.679	0.189	0.13	0.907766	FALSE	FALSE
non-targeting_00154	non-targeting	pool2	3.914	0.38	0.341	0.476634	FALSE	FALSE
non-targeting_00155	non-targeting	pool1	3.218	-0.855	-0.405	0.611083	FALSE	FALSE
non-targeting_00155	non-targeting	pool2	3.572	-0.724	-0.291	0.642665	FALSE	FALSE
non-targeting_00156	non-targeting	pool1	3.506	0.212	0.169	0.872116	FALSE	FALSE
non-targeting_00156	non-targeting	pool2	3.387	0.029	-0.103	0.933066	FALSE	FALSE
non-targeting_00157	non-targeting	pool1	2.92	0.917	0.686	0.222145	FALSE	FALSE
non-targeting_00157	non-targeting	pool2	2.481	0.55	-0.07	0.95854	FALSE	FALSE
non-targeting_00158	non-targeting	pool1	2.968	0.378	0.747	0.290698	FALSE	FALSE
non-targeting_00158	non-targeting	pool2	3.112	-0.164	-0.016	0.989675	FALSE	FALSE
non-targeting_00159	non-targeting	pool1	3.186	-0.337	-0.051	0.975666	FALSE	FALSE
non-targeting_00159	non-targeting	pool2	3.473	-0.036	0.114	0.914106	FALSE	FALSE
non-targeting_00160	non-targeting	pool1	3.891	-0.233	-0.175	0.836373	FALSE	FALSE
non-targeting_00160	non-targeting	pool2	3.873	-0.282	-0.242	0.672044	FALSE	FALSE
non-targeting_00161	non-targeting	pool1	3.585	-0.308	-0.49	0.388033	FALSE	FALSE
non-targeting_00161	non-targeting	pool2	3.467	-0.387	-0.327	0.5921	FALSE	FALSE
non-targeting_00162	non-targeting	pool1	4.149	-0.106	-0.422	0.361156	FALSE	FALSE
non-targeting_00162	non-targeting	pool2	3.869	-0.031	-0.289	0.584672	FALSE	FALSE
non-targeting_00163	non-targeting	pool1	4.464	0.118	0.132	0.877834	FALSE	FALSE
non-targeting_00163	non-targeting	pool2	4.077	-0.312	-0.303	0.51858	FALSE	FALSE
non-targeting_00164	non-targeting	pool1	4.19	0.047	-0.149	0.861546	FALSE	FALSE
non-targeting_00164	non-targeting	pool2	3.962	-0.098	0.03	0.973714	FALSE	FALSE
non-targeting_00165	non-targeting	pool1	3.979	-0.189	-0.169	0.848839	FALSE	FALSE
non-targeting_00165	non-targeting	pool2	4.024	0.003	0.163	0.833419	FALSE	FALSE
non-targeting_00166	non-targeting	pool1	4.113	-0.083	-0.027	0.987363	FALSE	FALSE
non-targeting_00166	non-targeting	pool2	3.955	0.149	0.134	0.85696	FALSE	FALSE
non-targeting_00167	non-targeting	pool1	4.825	0.164	0.116	0.891443	FALSE	FALSE
non-targeting_00167	non-targeting	pool2	4.73	0.185	0.053	0.949962	FALSE	FALSE
non-targeting_00168	non-targeting	pool1	2.767	-0.173	-0.339	0.745959	FALSE	FALSE
non-targeting_00168	non-targeting	pool2	2.885	0.433	0.411	0.641099	FALSE	FALSE
non-targeting_00169	non-targeting	pool1	3.494	0.18	0.117	0.931808	FALSE	FALSE
non-targeting_00169	non-targeting	pool2	3.416	0.443	0.571	0.212917	FALSE	FALSE
non-targeting_00170	non-targeting	pool1	2.902	0.071	0.241	0.85978	FALSE	FALSE
non-targeting_00170	non-targeting	pool2	3.054	-0.187	0.016	0.9899	FALSE	FALSE
non-targeting_00171	non-targeting	pool1	4.082	-0.169	-0.042	0.973793	FALSE	FALSE
non-targeting_00171	non-targeting	pool2	3.959	0.27	0.092	0.905725	FALSE	FALSE
non-targeting_00172	non-targeting	pool1	3.789	0.207	0.167	0.867565	FALSE	FALSE
non-targeting_00172	non-targeting	pool2	3.592	0.298	0.176	0.816863	FALSE	FALSE
non-targeting_00173	non-targeting	pool1	3.698	-0.307	0.115	0.929753	FALSE	FALSE
non-targeting_00173	non-targeting	pool2	3.403	-0.594	-0.268	0.714822	FALSE	FALSE
non-targeting_00174	non-targeting	pool1	3.996	-0.092	-0.046	0.971117	FALSE	FALSE
non-targeting_00174	non-targeting	pool2	4.125	0.127	0.182	0.756216	FALSE	FALSE
non-targeting_00175	non-targeting	pool1	4.307	0.218	0.053	0.961889	FALSE	FALSE
non-targeting_00175	non-targeting	pool2	4.417	0.27	0.065	0.932479	FALSE	FALSE
non-targeting_00176	non-targeting	pool1	3.9	-0.03	0.033	0.981805	FALSE	FALSE
non-targeting_00176	non-targeting	pool2	3.829	-0.067	-0.118	0.883823	FALSE	FALSE
non-targeting_00177	non-targeting	pool1	3.934	0.538	0.445	0.353389	FALSE	FALSE
non-targeting_00177	non-targeting	pool2	3.31	-0.334	-0.203	0.792542	FALSE	FALSE
non-targeting_00178	non-targeting	pool1	3.187	0.186	0.514	0.482389	FALSE	FALSE
non-targeting_00178	non-targeting	pool2	2.717	-0.798	-0.703	0.265227	FALSE	FALSE
non-targeting_00179	non-targeting	pool1	4.134	0.029	0.053	0.964532	FALSE	FALSE
non-targeting_00179	non-targeting	pool2	4.506	0.106	0.108	0.862472	FALSE	FALSE
non-targeting_00180	non-targeting	pool1	2.864	-0.211	-0.312	0.763958	FALSE	FALSE
non-targeting_00180	non-targeting	pool2	2.52	-0.484	-0.515	0.477887	FALSE	FALSE
non-targeting_00181	non-targeting	pool1	3.801	-0.468	-0.136	0.89097	FALSE	FALSE
non-targeting_00181	non-targeting	pool2	3.786	-0.368	0.013	0.991525	FALSE	FALSE
non-targeting_00182	non-targeting	pool1	4.135	-0.035	0.171	0.901018	FALSE	FALSE
non-targeting_00182	non-targeting	pool2	3.627	-0.333	-0.151	0.844115	FALSE	FALSE
non-targeting_00183	non-targeting	pool1	3.311	0.268	0.196	0.86115	FALSE	FALSE
non-targeting_00183	non-targeting	pool2	3.251	0.044	-0.185	0.825965	FALSE	FALSE
non-targeting_00184	non-targeting	pool1	3.588	-0.045	0.256	0.756631	FALSE	FALSE
non-targeting_00184	non-targeting	pool2	3.089	-0.785	-0.485	0.47062	FALSE	FALSE
non-targeting_00185	non-targeting	pool1	4.308	0.677	0.449	0.268766	FALSE	FALSE
non-targeting_00185	non-targeting	pool2	4.007	0.21	-0.076	0.92264	FALSE	FALSE
non-targeting_00186	non-targeting	pool1	3.764	0.189	0.129	0.89765	FALSE	FALSE
non-targeting_00186	non-targeting	pool2	3.681	-0.297	-0.167	0.839098	FALSE	FALSE
non-targeting_00187	non-targeting	pool1	3.457	0.057	0.239	0.796626	FALSE	FALSE
non-targeting_00187	non-targeting	pool2	3.394	-0.476	-0.49	0.360293	FALSE	FALSE
non-targeting_00188	non-targeting	pool1	3.009	0.115	0.123	0.929136	FALSE	FALSE
non-targeting_00188	non-targeting	pool2	3.226	0.135	0.281	0.711098	FALSE	FALSE
non-targeting_00189	non-targeting	pool1	3.84	0.054	0.115	0.91017	FALSE	FALSE
non-targeting_00189	non-targeting	pool2	3.544	-0.326	-0.063	0.952538	FALSE	FALSE
non-targeting_00190	non-targeting	pool1	4.103	0.236	0.049	0.96926	FALSE	FALSE
non-targeting_00190	non-targeting	pool2	4.359	-0.144	-0.302	0.487521	FALSE	FALSE
non-targeting_00191	non-targeting	pool1	3.954	-0.271	0.063	0.960612	FALSE	FALSE
non-targeting_00191	non-targeting	pool2	4.265	-0.071	0.286	0.559541	FALSE	FALSE
non-targeting_00192	non-targeting	pool1	4.872	0.093	0.144	0.833279	FALSE	FALSE
non-targeting_00192	non-targeting	pool2	4.801	0.193	0.13	0.838769	FALSE	FALSE
non-targeting_00193	non-targeting	pool1	3.689	0.413	0.22	0.79286	FALSE	FALSE
non-targeting_00193	non-targeting	pool2	4.136	0.576	0.275	0.673298	FALSE	FALSE
non-targeting_00194	non-targeting	pool1	4.342	0.448	0.478	0.27108	FALSE	FALSE
non-targeting_00194	non-targeting	pool2	4.366	0.146	0.036	0.971096	FALSE	FALSE
non-targeting_00195	non-targeting	pool1	4.095	0.107	0.018	0.990091	FALSE	FALSE
non-targeting_00195	non-targeting	pool2	3.807	-0.108	-0.247	0.683493	FALSE	FALSE
non-targeting_00196	non-targeting	pool1	3.713	0.259	0.518	0.386065	FALSE	FALSE
non-targeting_00196	non-targeting	pool2	3.522	-0.3	0.019	0.987661	FALSE	FALSE
non-targeting_00197	non-targeting	pool1	3.383	-0.441	-0.229	0.822451	FALSE	FALSE
non-targeting_00197	non-targeting	pool2	3.252	-0.489	-0.168	0.873117	FALSE	FALSE
non-targeting_00198	non-targeting	pool1	4.008	-0.107	0.012	0.993159	FALSE	FALSE
non-targeting_00198	non-targeting	pool2	4.124	-0.043	0.198	0.785371	FALSE	FALSE
non-targeting_00199	non-targeting	pool1	4.222	-0.005	-0.147	0.866336	FALSE	FALSE
non-targeting_00199	non-targeting	pool2	3.33	-0.248	-0.238	0.749321	FALSE	FALSE
non-targeting_00200	non-targeting	pool1	3.998	0.423	0.582	0.180998	FALSE	FALSE
non-targeting_00200	non-targeting	pool2	3.565	-0.34	-0.411	0.415671	FALSE	FALSE
non-targeting_00201	non-targeting	pool1	3.885	-0.276	-0.188	0.82802	FALSE	FALSE
non-targeting_00201	non-targeting	pool2	4.166	-0.27	-0.208	0.705931	FALSE	FALSE
non-targeting_00202	non-targeting	pool1	4.446	0.341	0.152	0.835165	FALSE	FALSE
non-targeting_00202	non-targeting	pool2	4.339	0.228	0.135	0.823574	FALSE	FALSE
non-targeting_00203	non-targeting	pool1	3.227	-0.079	0.008	0.995999	FALSE	FALSE
non-targeting_00203	non-targeting	pool2	3.511	0.228	0.204	0.774207	FALSE	FALSE
non-targeting_00204	non-targeting	pool1	4.303	0.335	0.041	0.97177	FALSE	FALSE
non-targeting_00204	non-targeting	pool2	3.823	0.088	-0.147	0.866287	FALSE	FALSE
non-targeting_00205	non-targeting	pool1	4.634	0.066	0.006	0.99529	FALSE	FALSE
non-targeting_00205	non-targeting	pool2	4.333	-0.049	-0.091	0.897614	FALSE	FALSE
non-targeting_00206	non-targeting	pool1	3.308	-0.459	-0.359	0.635172	FALSE	FALSE
non-targeting_00206	non-targeting	pool2	3.126	-0.541	-0.493	0.409574	FALSE	FALSE
non-targeting_00207	non-targeting	pool1	3.87	-0.269	-0.355	0.547428	FALSE	FALSE
non-targeting_00207	non-targeting	pool2	3.919	0.049	0.22	0.714557	FALSE	FALSE
non-targeting_00208	non-targeting	pool1	4.749	0.272	-0.002	0.998492	FALSE	FALSE
non-targeting_00208	non-targeting	pool2	4.293	0.072	-0.097	0.884544	FALSE	FALSE
non-targeting_00209	non-targeting	pool1	3.512	-0.704	-0.911	0.00368089	TRUE	FALSE
non-targeting_00209	non-targeting	pool2	3.42	-0.272	-0.016	0.989429	FALSE	FALSE
non-targeting_00210	non-targeting	pool1	4.089	-0.192	-0.096	0.92488	FALSE	FALSE
non-targeting_00210	non-targeting	pool2	3.891	-0.421	-0.49	0.221739	FALSE	FALSE
non-targeting_00211	non-targeting	pool1	4.284	0.295	0.358	0.442067	FALSE	FALSE
non-targeting_00211	non-targeting	pool2	3.485	-0.291	-0.17	0.838715	FALSE	FALSE
non-targeting_00212	non-targeting	pool1	3.043	-0.181	-0.095	0.953477	FALSE	FALSE
non-targeting_00212	non-targeting	pool2	2.905	-0.407	-0.461	0.473716	FALSE	FALSE
non-targeting_00213	non-targeting	pool1	4.464	-0.397	-0.131	0.88331	FALSE	FALSE
non-targeting_00213	non-targeting	pool2	3.889	-0.916	-0.595	0.0940753	FALSE	FALSE
non-targeting_00214	non-targeting	pool1	3.736	-0.188	-0.188	0.846263	FALSE	FALSE
non-targeting_00214	non-targeting	pool2	4.172	-0.109	-0.164	0.80744	FALSE	FALSE
non-targeting_00215	non-targeting	pool1	4.292	0.401	0.504	0.264103	FALSE	FALSE
non-targeting_00215	non-targeting	pool2	3.824	-0.521	-0.704	0.0253102	TRUE	FALSE
non-targeting_00216	non-targeting	pool1	3.053	-0.116	0.031	0.986491	FALSE	FALSE
non-targeting_00216	non-targeting	pool2	3.022	0.157	0.325	0.681018	FALSE	FALSE
non-targeting_00217	non-targeting	pool1	2.776	-0.093	0.351	0.737913	FALSE	FALSE
non-targeting_00217	non-targeting	pool2	2.474	-0.616	-0.336	0.711505	FALSE	FALSE
non-targeting_00218	non-targeting	pool1	2.544	-0.788	-0.769	0.21238	FALSE	FALSE
non-targeting_00218	non-targeting	pool2	3.117	-0.083	-0.181	0.860926	FALSE	FALSE
non-targeting_00219	non-targeting	pool1	3.84	-0.176	0.092	0.937854	FALSE	FALSE
non-targeting_00219	non-targeting	pool2	4.078	0.154	0.106	0.884193	FALSE	FALSE
non-targeting_00220	non-targeting	pool1	4.156	-0.37	-0.144	0.867717	FALSE	FALSE
non-targeting_00220	non-targeting	pool2	3.967	-0.492	-0.093	0.902463	FALSE	FALSE
non-targeting_00221	non-targeting	pool1	4.578	0.049	0.123	0.870488	FALSE	FALSE
non-targeting_00221	non-targeting	pool2	4.334	0.124	0.079	0.910062	FALSE	FALSE
non-targeting_00222	non-targeting	pool1	4.014	-0.001	0.005	0.99739	FALSE	FALSE
non-targeting_00222	non-targeting	pool2	3.729	-0.005	0.164	0.83606	FALSE	FALSE
non-targeting_00223	non-targeting	pool1	3.939	-0.232	0.015	0.991561	FALSE	FALSE
non-targeting_00223	non-targeting	pool2	3.925	-0.247	-0.167	0.815131	FALSE	FALSE
non-targeting_00224	non-targeting	pool1	2.618	-0.077	-0.069	0.971542	FALSE	FALSE
non-targeting_00224	non-targeting	pool2	3.17	0.132	0.316	0.685575	FALSE	FALSE
non-targeting_00225	non-targeting	pool1	2.705	0.364	0.129	0.932929	FALSE	FALSE
non-targeting_00225	non-targeting	pool2	2.851	-0.005	0.122	0.91247	FALSE	FALSE
non-targeting_00226	non-targeting	pool1	3.35	0.032	0.175	0.873701	FALSE	FALSE
non-targeting_00226	non-targeting	pool2	3.39	0.065	0.152	0.85696	FALSE	FALSE
non-targeting_00227	non-targeting	pool1	4.091	-0.098	-0.101	0.923819	FALSE	FALSE
non-targeting_00227	non-targeting	pool2	3.831	0.017	0.105	0.89981	FALSE	FALSE
non-targeting_00228	non-targeting	pool1	4.14	0.626	0.456	0.29793	FALSE	FALSE
non-targeting_00228	non-targeting	pool2	4.58	1.565	1.413	1.97148e-09	FALSE	TRUE
non-targeting_00229	non-targeting	pool1	3.025	0.339	0.087	0.958517	FALSE	FALSE
non-targeting_00229	non-targeting	pool2	3.184	0.688	0.305	0.658326	FALSE	FALSE
non-targeting_00230	non-targeting	pool1	3.827	-0.178	-0.133	0.892869	FALSE	FALSE
non-targeting_00230	non-targeting	pool2	3.708	-0.061	-0.064	0.943932	FALSE	FALSE
non-targeting_00231	non-targeting	pool1	3.651	0.051	0.242	0.771234	FALSE	FALSE
non-targeting_00231	non-targeting	pool2	3.569	-0.043	0.257	0.682445	FALSE	FALSE
non-targeting_00232	non-targeting	pool1	4.064	0.069	0.335	0.564816	FALSE	FALSE
non-targeting_00232	non-targeting	pool2	3.757	-0.657	-0.563	0.206093	FALSE	FALSE
non-targeting_00233	non-targeting	pool1	2.741	-0.588	-0.656	0.334657	FALSE	FALSE
non-targeting_00233	non-targeting	pool2	3.008	-0.25	-0.391	0.59887	FALSE	FALSE
non-targeting_00234	non-targeting	pool1	3.618	0.236	0.238	0.775952	FALSE	FALSE
non-targeting_00234	non-targeting	pool2	3.184	-0.178	-0.206	0.812017	FALSE	FALSE
non-targeting_00235	non-targeting	pool1	3.44	0.069	0.047	0.97546	FALSE	FALSE
non-targeting_00235	non-targeting	pool2	3.225	0.022	0.044	0.969591	FALSE	FALSE
non-targeting_00236	non-targeting	pool1	3.723	-0.468	-0.035	0.981805	FALSE	FALSE
non-targeting_00236	non-targeting	pool2	4.161	-0.06	0.264	0.608794	FALSE	FALSE
non-targeting_00237	non-targeting	pool1	4.374	0.186	-0.005	0.996314	FALSE	FALSE
non-targeting_00237	non-targeting	pool2	3.897	0.225	0.15	0.838675	FALSE	FALSE
non-targeting_00238	non-targeting	pool1	4.001	0.252	0.212	0.791012	FALSE	FALSE
non-targeting_00238	non-targeting	pool2	3.928	0.305	0.395	0.497149	FALSE	FALSE
non-targeting_00239	non-targeting	pool1	2.544	-0.146	-0.211	0.893332	FALSE	FALSE
non-targeting_00239	non-targeting	pool2	2.473	-0.304	-0.425	0.603436	FALSE	FALSE
non-targeting_00240	non-targeting	pool1	4.037	0.339	0.262	0.709943	FALSE	FALSE
non-targeting_00240	non-targeting	pool2	4.117	0.324	0.226	0.706356	FALSE	FALSE
non-targeting_00241	non-targeting	pool1	3.893	0.068	0	0.999823	FALSE	FALSE
non-targeting_00241	non-targeting	pool2	3.719	-0.242	-0.357	0.565963	FALSE	FALSE
non-targeting_00242	non-targeting	pool1	2.813	-0.235	0.179	0.895726	FALSE	FALSE
non-targeting_00242	non-targeting	pool2	2.887	-0.102	0.045	0.971732	FALSE	FALSE
non-targeting_00243	non-targeting	pool1	4.018	0.236	0.376	0.470677	FALSE	FALSE
non-targeting_00243	non-targeting	pool2	3.853	0.374	0.35	0.482547	FALSE	FALSE
non-targeting_00244	non-targeting	pool1	2.271	-0.08	-0.269	0.874921	FALSE	FALSE
non-targeting_00244	non-targeting	pool2	1.795	0.131	-0.162	0.905725	FALSE	FALSE
non-targeting_00245	non-targeting	pool1	3.551	0.136	0.112	0.925978	FALSE	FALSE
non-targeting_00245	non-targeting	pool2	3.278	-0.284	-0.199	0.827665	FALSE	FALSE
non-targeting_00246	non-targeting	pool1	4.215	0.046	-0.13	0.882734	FALSE	FALSE
non-targeting_00246	non-targeting	pool2	3.98	0.264	-0.012	0.990427	FALSE	FALSE
non-targeting_00247	non-targeting	pool1	2.418	-0.346	-0.212	0.900884	FALSE	FALSE
non-targeting_00247	non-targeting	pool2	2.423	-0.232	0.066	0.963156	FALSE	FALSE
non-targeting_00248	non-targeting	pool1	3.905	-0.15	-0.149	0.874119	FALSE	FALSE
non-targeting_00248	non-targeting	pool2	3.761	-0.017	0.244	0.711281	FALSE	FALSE
non-targeting_00249	non-targeting	pool1	3.593	-0.446	-0.211	0.808395	FALSE	FALSE
non-targeting_00249	non-targeting	pool2	3.607	-0.193	0.061	0.951031	FALSE	FALSE
non-targeting_00250	non-targeting	pool1	3.747	0.08	-0.132	0.902182	FALSE	FALSE
non-targeting_00250	non-targeting	pool2	3.599	-0.138	-0.253	0.686682	FALSE	FALSE
non-targeting_00251	non-targeting	pool1	3.457	-0.405	-0.23	0.801203	FALSE	FALSE
non-targeting_00251	non-targeting	pool2	3.693	0.055	0.112	0.894596	FALSE	FALSE
non-targeting_00252	non-targeting	pool1	4.673	-0.1	-0.133	0.870943	FALSE	FALSE
non-targeting_00252	non-targeting	pool2	4.676	-0.072	0.134	0.847938	FALSE	FALSE
non-targeting_00253	non-targeting	pool1	3.584	-0.084	0.134	0.919202	FALSE	FALSE
non-targeting_00253	non-targeting	pool2	3.748	0.129	0.221	0.751828	FALSE	FALSE
non-targeting_00254	non-targeting	pool1	4.114	-0.025	-0.051	0.970026	FALSE	FALSE
non-targeting_00254	non-targeting	pool2	3.756	-0.349	-0.154	0.838134	FALSE	FALSE
non-targeting_00255	non-targeting	pool1	3.886	-0.035	-0.09	0.942149	FALSE	FALSE
non-targeting_00255	non-targeting	pool2	3.881	-0.136	-0.289	0.58991	FALSE	FALSE
non-targeting_00256	non-targeting	pool1	2.822	-0.415	0.014	0.99545	FALSE	FALSE
non-targeting_00256	non-targeting	pool2	3.231	-0.076	0.113	0.905614	FALSE	FALSE
non-targeting_00257	non-targeting	pool1	3.955	-0.005	0.13	0.90341	FALSE	FALSE
non-targeting_00257	non-targeting	pool2	4.149	0.146	0.258	0.654605	FALSE	FALSE
non-targeting_00258	non-targeting	pool1	3.068	-0.72	-0.224	0.872574	FALSE	FALSE
non-targeting_00258	non-targeting	pool2	3.308	-0.489	-0.353	0.605882	FALSE	FALSE
non-targeting_00259	non-targeting	pool1	3.831	-0.078	0.005	0.997537	FALSE	FALSE
non-targeting_00259	non-targeting	pool2	3.728	-0.604	-0.681	0.0395455	TRUE	FALSE
non-targeting_00260	non-targeting	pool1	3.406	-0.427	-0.459	0.452251	FALSE	FALSE
non-targeting_00260	non-targeting	pool2	3.723	0.172	0.161	0.860557	FALSE	FALSE
non-targeting_00261	non-targeting	pool1	4.055	-0.42	-0.3	0.70347	FALSE	FALSE
non-targeting_00261	non-targeting	pool2	4.195	-0.351	-0.36	0.449496	FALSE	FALSE
non-targeting_00262	non-targeting	pool1	3.526	0.416	0.438	0.52685	FALSE	FALSE
non-targeting_00262	non-targeting	pool2	3.526	-0.063	0.158	0.844115	FALSE	FALSE
non-targeting_00263	non-targeting	pool1	4.279	0.071	-0.067	0.95031	FALSE	FALSE
non-targeting_00263	non-targeting	pool2	3.92	0.301	0.515	0.228341	FALSE	FALSE
non-targeting_00264	non-targeting	pool1	4.734	0.234	-0.001	0.998984	FALSE	FALSE
non-targeting_00264	non-targeting	pool2	4.325	0.007	-0.103	0.878632	FALSE	FALSE
non-targeting_00265	non-targeting	pool1	3.304	-0.566	-0.871	0.0652435	FALSE	FALSE
non-targeting_00265	non-targeting	pool2	3.223	-0.439	-0.569	0.257945	FALSE	FALSE
non-targeting_00266	non-targeting	pool1	3.02	-0.543	-0.425	0.601384	FALSE	FALSE
non-targeting_00266	non-targeting	pool2	2.745	-0.404	-0.126	0.910899	FALSE	FALSE
non-targeting_00267	non-targeting	pool1	3.849	0.115	0.186	0.821124	FALSE	FALSE
non-targeting_00267	non-targeting	pool2	3.677	-0.586	-0.725	0.0257796	TRUE	FALSE
non-targeting_00268	non-targeting	pool1	3.191	0.397	0.245	0.806083	FALSE	FALSE
non-targeting_00268	non-targeting	pool2	2.73	0.772	0.955	0.0364327	FALSE	TRUE
non-targeting_00269	non-targeting	pool1	3.319	0.086	0.034	0.984141	FALSE	FALSE
non-targeting_00269	non-targeting	pool2	3.19	-0.405	-0.279	0.735486	FALSE	FALSE
non-targeting_00270	non-targeting	pool1	4.375	0.232	0.409	0.3103	FALSE	FALSE
non-targeting_00270	non-targeting	pool2	4.439	0.166	0.338	0.409922	FALSE	FALSE
non-targeting_00271	non-targeting	pool1	3.109	-0.846	-0.523	0.453066	FALSE	FALSE
non-targeting_00271	non-targeting	pool2	3.276	-0.474	0.027	0.982488	FALSE	FALSE
non-targeting_00272	non-targeting	pool1	3.325	-0.252	-0.127	0.924876	FALSE	FALSE
non-targeting_00272	non-targeting	pool2	3.351	-0.082	-0.08	0.937526	FALSE	FALSE
non-targeting_00273	non-targeting	pool1	4.152	-0.037	-0.067	0.95276	FALSE	FALSE
non-targeting_00273	non-targeting	pool2	4.376	-0.045	-0.08	0.916243	FALSE	FALSE
non-targeting_00274	non-targeting	pool1	3.657	0.251	0.412	0.476708	FALSE	FALSE
non-targeting_00274	non-targeting	pool2	3.49	-0.007	0.251	0.740634	FALSE	FALSE
non-targeting_00275	non-targeting	pool1	3.708	-0.263	-0.193	0.825771	FALSE	FALSE
non-targeting_00275	non-targeting	pool2	3.931	-0.003	0.219	0.714822	FALSE	FALSE
non-targeting_00276	non-targeting	pool1	3.937	0.113	-0.014	0.992217	FALSE	FALSE
non-targeting_00276	non-targeting	pool2	3.992	0.162	0.175	0.787253	FALSE	FALSE
non-targeting_00277	non-targeting	pool1	4.257	0.308	0.355	0.499828	FALSE	FALSE
non-targeting_00277	non-targeting	pool2	3.956	0.439	0.304	0.63751	FALSE	FALSE
non-targeting_00278	non-targeting	pool1	4.377	-0.106	-0.282	0.599414	FALSE	FALSE
non-targeting_00278	non-targeting	pool2	4.394	-0.114	-0.114	0.871797	FALSE	FALSE
non-targeting_00279	non-targeting	pool1	3.466	-0.211	-0.36	0.606343	FALSE	FALSE
non-targeting_00279	non-targeting	pool2	3.939	0.235	0.127	0.862472	FALSE	FALSE
non-targeting_00280	non-targeting	pool1	3.689	-0.277	-0.035	0.98282	FALSE	FALSE
non-targeting_00280	non-targeting	pool2	3.493	-0.537	-0.345	0.597445	FALSE	FALSE
non-targeting_00281	non-targeting	pool1	4.694	0.279	0.083	0.923289	FALSE	FALSE
non-targeting_00281	non-targeting	pool2	4.314	0.174	0.037	0.967021	FALSE	FALSE
non-targeting_00282	non-targeting	pool1	2.29	-0.896	-0.659	0.398525	FALSE	FALSE
non-targeting_00282	non-targeting	pool2	2.491	-0.548	-0.301	0.759373	FALSE	FALSE
non-targeting_00283	non-targeting	pool1	3.789	-0.049	-0.113	0.918042	FALSE	FALSE
non-targeting_00283	non-targeting	pool2	3.866	0.301	0.411	0.372027	FALSE	FALSE
non-targeting_00284	non-targeting	pool1	4.26	-0.055	-0.096	0.920982	FALSE	FALSE
non-targeting_00284	non-targeting	pool2	4.013	-0.145	-0.231	0.720207	FALSE	FALSE
non-targeting_00285	non-targeting	pool1	4.402	-0.283	-0.359	0.421179	FALSE	FALSE
non-targeting_00285	non-targeting	pool2	4.347	0.062	0.124	0.839066	FALSE	FALSE
non-targeting_00286	non-targeting	pool1	3.74	-0.45	-0.321	0.676849	FALSE	FALSE
non-targeting_00286	non-targeting	pool2	3.68	-0.532	-0.413	0.472281	FALSE	FALSE
non-targeting_00287	non-targeting	pool1	4.011	-0.281	-0.218	0.809813	FALSE	FALSE
non-targeting_00287	non-targeting	pool2	4.075	-0.005	-0.024	0.977681	FALSE	FALSE
non-targeting_00288	non-targeting	pool1	3.427	0.081	0.016	0.992258	FALSE	FALSE
non-targeting_00288	non-targeting	pool2	3.244	0.009	-0.07	0.947636	FALSE	FALSE
non-targeting_00289	non-targeting	pool1	3.228	-0.324	-0.247	0.797476	FALSE	FALSE
non-targeting_00289	non-targeting	pool2	3.657	-0.007	-0.259	0.700571	FALSE	FALSE
non-targeting_00290	non-targeting	pool1	4.311	-0.027	-0.245	0.686191	FALSE	FALSE
non-targeting_00290	non-targeting	pool2	4.142	0.205	0.157	0.818338	FALSE	FALSE
non-targeting_00291	non-targeting	pool1	4.329	-0.221	-0.178	0.808677	FALSE	FALSE
non-targeting_00291	non-targeting	pool2	4.43	0.043	-0.132	0.837696	FALSE	FALSE
non-targeting_00292	non-targeting	pool1	3.587	0.267	0.43	0.497935	FALSE	FALSE
non-targeting_00292	non-targeting	pool2	3.961	0.384	0.303	0.570506	FALSE	FALSE
non-targeting_00293	non-targeting	pool1	4.009	-0.185	-0.161	0.865079	FALSE	FALSE
non-targeting_00293	non-targeting	pool2	3.896	-0.095	-0.061	0.944683	FALSE	FALSE
non-targeting_00294	non-targeting	pool1	3.678	-0.076	0.193	0.838027	FALSE	FALSE
non-targeting_00294	non-targeting	pool2	3.547	-0.605	-0.367	0.566691	FALSE	FALSE
non-targeting_00295	non-targeting	pool1	3.612	-0.5	-0.381	0.547763	FALSE	FALSE
non-targeting_00295	non-targeting	pool2	3.763	-0.412	-0.353	0.481926	FALSE	FALSE
non-targeting_00296	non-targeting	pool1	2.207	-0.265	0.02	0.9931	FALSE	FALSE
non-targeting_00296	non-targeting	pool2	2.61	-0.023	0.41	0.679868	FALSE	FALSE
non-targeting_00297	non-targeting	pool1	3.848	0.031	0.088	0.93755	FALSE	FALSE
non-targeting_00297	non-targeting	pool2	4.113	0.048	0.133	0.84106	FALSE	FALSE
non-targeting_00298	non-targeting	pool1	4.412	-0.032	0.058	0.957896	FALSE	FALSE
non-targeting_00298	non-targeting	pool2	4.21	-0.295	-0.438	0.247438	FALSE	FALSE
non-targeting_00299	non-targeting	pool1	3.751	-0.269	-0.35	0.616312	FALSE	FALSE
non-targeting_00299	non-targeting	pool2	3.871	-0.123	-0.194	0.763136	FALSE	FALSE
non-targeting_00300	non-targeting	pool1	2.991	-0.722	-0.607	0.314292	FALSE	FALSE
non-targeting_00300	non-targeting	pool2	3.55	0.132	0.014	0.991317	FALSE	FALSE
non-targeting_00301	non-targeting	pool1	4.143	-0.04	-0.129	0.892881	FALSE	FALSE
non-targeting_00301	non-targeting	pool2	4.315	0.217	0.213	0.729093	FALSE	FALSE
non-targeting_00302	non-targeting	pool1	3.604	0.526	0.198	0.829379	FALSE	FALSE
non-targeting_00302	non-targeting	pool2	3.816	0.627	0.424	0.442145	FALSE	FALSE
non-targeting_00303	non-targeting	pool1	4.132	0.045	0.029	0.982735	FALSE	FALSE
non-targeting_00303	non-targeting	pool2	4.322	0.47	0.318	0.44176	FALSE	FALSE
non-targeting_00304	non-targeting	pool1	3.599	-0.369	-0.114	0.926271	FALSE	FALSE
non-targeting_00304	non-targeting	pool2	3.444	-0.229	-0.152	0.855786	FALSE	FALSE
non-targeting_00305	non-targeting	pool1	3.448	-0.346	-0.323	0.684398	FALSE	FALSE
non-targeting_00305	non-targeting	pool2	3.468	0.231	0.361	0.559214	FALSE	FALSE
non-targeting_00306	non-targeting	pool1	3.992	-0.063	-0.044	0.975032	FALSE	FALSE
non-targeting_00306	non-targeting	pool2	3.941	0.004	-0.097	0.899378	FALSE	FALSE
non-targeting_00307	non-targeting	pool1	3.681	-0.281	-0.009	0.99529	FALSE	FALSE
non-targeting_00307	non-targeting	pool2	3.761	-0.141	-0.096	0.912614	FALSE	FALSE
non-targeting_00308	non-targeting	pool1	4.35	0.186	0.383	0.492343	FALSE	FALSE
non-targeting_00308	non-targeting	pool2	4.469	0.028	-0.107	0.890862	FALSE	FALSE
non-targeting_00309	non-targeting	pool1	3.213	-0.281	0.025	0.9884	FALSE	FALSE
non-targeting_00309	non-targeting	pool2	2.83	-0.573	-0.374	0.613649	FALSE	FALSE
non-targeting_00310	non-targeting	pool1	3.928	-0.247	-0.125	0.896864	FALSE	FALSE
non-targeting_00310	non-targeting	pool2	3.988	-0.024	0.306	0.528531	FALSE	FALSE
non-targeting_00311	non-targeting	pool1	4.313	0.074	0.097	0.921831	FALSE	FALSE
non-targeting_00311	non-targeting	pool2	3.954	-0.148	-0.062	0.94233	FALSE	FALSE
non-targeting_00312	non-targeting	pool1	3.165	0.124	-0.043	0.980457	FALSE	FALSE
non-targeting_00312	non-targeting	pool2	2.458	-0.427	-0.061	0.964637	FALSE	FALSE
non-targeting_00313	non-targeting	pool1	3.702	0.25	0.246	0.766224	FALSE	FALSE
non-targeting_00313	non-targeting	pool2	3.601	0.241	0.107	0.904482	FALSE	FALSE
non-targeting_00314	non-targeting	pool1	4.233	0.022	-0.108	0.906613	FALSE	FALSE
non-targeting_00314	non-targeting	pool2	3.749	-0.44	-0.499	0.227969	FALSE	FALSE
non-targeting_00315	non-targeting	pool1	4.381	0.329	0.258	0.653263	FALSE	FALSE
non-targeting_00315	non-targeting	pool2	3.867	-0.051	-0.216	0.719473	FALSE	FALSE
non-targeting_00316	non-targeting	pool1	3.668	0.317	0.048	0.973807	FALSE	FALSE
non-targeting_00316	non-targeting	pool2	3.805	0.617	0.431	0.325628	FALSE	FALSE
non-targeting_00317	non-targeting	pool1	4.143	0.346	-0.195	0.808854	FALSE	FALSE
non-targeting_00317	non-targeting	pool2	4.185	0.341	0.217	0.688918	FALSE	FALSE
non-targeting_00318	non-targeting	pool1	3.796	-0.084	0.074	0.956398	FALSE	FALSE
non-targeting_00318	non-targeting	pool2	3.729	-0.251	0.028	0.977185	FALSE	FALSE
non-targeting_00319	non-targeting	pool1	4.244	0.207	-0.081	0.932508	FALSE	FALSE
non-targeting_00319	non-targeting	pool2	4.32	0.518	0.319	0.477796	FALSE	FALSE
non-targeting_00320	non-targeting	pool1	3.712	-0.738	-0.582	0.186759	FALSE	FALSE
non-targeting_00320	non-targeting	pool2	3.225	-0.94	-0.727	0.183099	FALSE	FALSE
non-targeting_00321	non-targeting	pool1	3.683	-0.309	-0.15	0.885398	FALSE	FALSE
non-targeting_00321	non-targeting	pool2	3.848	-0.27	-0.121	0.882475	FALSE	FALSE
non-targeting_00322	non-targeting	pool1	3.892	0.114	0.19	0.811974	FALSE	FALSE
non-targeting_00322	non-targeting	pool2	3.593	-0.166	-0.051	0.960392	FALSE	FALSE
non-targeting_00323	non-targeting	pool1	3.418	-0.365	-0.228	0.842551	FALSE	FALSE
non-targeting_00323	non-targeting	pool2	3.497	-0.263	0.017	0.987886	FALSE	FALSE
non-targeting_00324	non-targeting	pool1	4.028	0.064	0.449	0.395417	FALSE	FALSE
non-targeting_00324	non-targeting	pool2	3.804	0.071	0.208	0.748148	FALSE	FALSE
non-targeting_00325	non-targeting	pool1	3.947	-0.108	-0.151	0.864898	FALSE	FALSE
non-targeting_00325	non-targeting	pool2	3.936	-0.25	-0.233	0.684261	FALSE	FALSE
non-targeting_00326	non-targeting	pool1	3.91	0.164	0.017	0.990609	FALSE	FALSE
non-targeting_00326	non-targeting	pool2	3.843	0.063	-0.105	0.896078	FALSE	FALSE
non-targeting_00327	non-targeting	pool1	3.853	0.169	0.123	0.902182	FALSE	FALSE
non-targeting_00327	non-targeting	pool2	4.103	0.216	-0.04	0.962654	FALSE	FALSE
non-targeting_00328	non-targeting	pool1	3.08	-0.131	-0.134	0.919051	FALSE	FALSE
non-targeting_00328	non-targeting	pool2	3.039	0.032	0.059	0.959922	FALSE	FALSE
non-targeting_00329	non-targeting	pool1	4.327	0.122	0.125	0.880709	FALSE	FALSE
non-targeting_00329	non-targeting	pool2	4.196	0.171	0.124	0.848878	FALSE	FALSE
non-targeting_00330	non-targeting	pool1	3.947	0.227	0.256	0.739059	FALSE	FALSE
non-targeting_00330	non-targeting	pool2	3.523	0.134	0.173	0.838046	FALSE	FALSE
non-targeting_00331	non-targeting	pool1	3.934	-0.28	-0.104	0.918062	FALSE	FALSE
non-targeting_00331	non-targeting	pool2	4.222	-0.009	0.003	0.997058	FALSE	FALSE
non-targeting_00332	non-targeting	pool1	4.139	0.145	0.076	0.942179	FALSE	FALSE
non-targeting_00332	non-targeting	pool2	4.192	0.08	0.078	0.916677	FALSE	FALSE
non-targeting_00333	non-targeting	pool1	4.246	0.497	0.354	0.471848	FALSE	FALSE
non-targeting_00333	non-targeting	pool2	4.106	0.056	-0.23	0.673355	FALSE	FALSE
non-targeting_00334	non-targeting	pool1	2.775	0.422	0.263	0.818067	FALSE	FALSE
non-targeting_00334	non-targeting	pool2	2.284	-0.038	0.227	0.83735	FALSE	FALSE
non-targeting_00335	non-targeting	pool1	2.498	-0.295	-0.469	0.606343	FALSE	FALSE
non-targeting_00335	non-targeting	pool2	2.688	0.296	0.002	0.998657	FALSE	FALSE
non-targeting_00336	non-targeting	pool1	3.486	-0.275	-0.045	0.977283	FALSE	FALSE
non-targeting_00336	non-targeting	pool2	3.757	-0.048	0.151	0.84058	FALSE	FALSE
non-targeting_00337	non-targeting	pool1	4.6	-0.173	-0.139	0.856937	FALSE	FALSE
non-targeting_00337	non-targeting	pool2	4.316	-0.18	-0.137	0.861213	FALSE	FALSE
non-targeting_00338	non-targeting	pool1	4.34	0.03	-0.043	0.970766	FALSE	FALSE
non-targeting_00338	non-targeting	pool2	4.325	0.166	0.052	0.961445	FALSE	FALSE
non-targeting_00339	non-targeting	pool1	4.015	-0.273	-0.124	0.903968	FALSE	FALSE
non-targeting_00339	non-targeting	pool2	3.955	-0.152	-0.096	0.898204	FALSE	FALSE
non-targeting_00340	non-targeting	pool1	3.936	-0.084	0.009	0.995043	FALSE	FALSE
non-targeting_00340	non-targeting	pool2	3.606	-0.34	-0.284	0.684146	FALSE	FALSE
non-targeting_00341	non-targeting	pool1	4.012	0.48	0.54	0.168396	FALSE	FALSE
non-targeting_00341	non-targeting	pool2	4.088	0.311	0.031	0.976502	FALSE	FALSE
non-targeting_00342	non-targeting	pool1	3.718	-0.294	-0.447	0.383105	FALSE	FALSE
non-targeting_00342	non-targeting	pool2	3.441	-0.327	-0.354	0.589188	FALSE	FALSE
non-targeting_00343	non-targeting	pool1	3.201	0.05	0.242	0.818192	FALSE	FALSE
non-targeting_00343	non-targeting	pool2	3.043	-0.264	-0.24	0.774272	FALSE	FALSE
non-targeting_00344	non-targeting	pool1	2.639	-0.092	0.051	0.980169	FALSE	FALSE
non-targeting_00344	non-targeting	pool2	3.002	0.707	0.573	0.295849	FALSE	FALSE
non-targeting_00345	non-targeting	pool1	3.824	0.342	0.318	0.641085	FALSE	FALSE
non-targeting_00345	non-targeting	pool2	4.171	0.494	0.215	0.739511	FALSE	FALSE
non-targeting_00346	non-targeting	pool1	4.019	-0.07	0.036	0.979895	FALSE	FALSE
non-targeting_00346	non-targeting	pool2	3.723	0.02	0.056	0.9568	FALSE	FALSE
non-targeting_00347	non-targeting	pool1	3.97	0.297	0.298	0.671464	FALSE	FALSE
non-targeting_00347	non-targeting	pool2	3.809	0.33	0.259	0.671895	FALSE	FALSE
non-targeting_00348	non-targeting	pool1	3.718	-0.257	-0.293	0.672807	FALSE	FALSE
non-targeting_00348	non-targeting	pool2	3.29	-0.425	-0.141	0.87356	FALSE	FALSE
non-targeting_00349	non-targeting	pool1	4.129	0.328	0.206	0.810231	FALSE	FALSE
non-targeting_00349	non-targeting	pool2	3.778	0.351	0.491	0.307044	FALSE	FALSE
non-targeting_00350	non-targeting	pool1	3.936	0.344	-0.004	0.997717	FALSE	FALSE
non-targeting_00350	non-targeting	pool2	3.664	0.169	-0.03	0.977999	FALSE	FALSE
non-targeting_00351	non-targeting	pool1	3.608	-0.289	-0.172	0.866408	FALSE	FALSE
non-targeting_00351	non-targeting	pool2	3.502	-0.033	0.161	0.844115	FALSE	FALSE
non-targeting_00352	non-targeting	pool1	3.527	-0.021	0.154	0.884084	FALSE	FALSE
non-targeting_00352	non-targeting	pool2	3.822	0.034	0.033	0.972202	FALSE	FALSE
non-targeting_00353	non-targeting	pool1	4.604	0.657	0.45	0.339203	FALSE	FALSE
non-targeting_00353	non-targeting	pool2	4.267	0.342	0.116	0.862396	FALSE	FALSE
non-targeting_00354	non-targeting	pool1	3.998	0.137	0.12	0.900158	FALSE	FALSE
non-targeting_00354	non-targeting	pool2	4.014	0.354	0.255	0.65081	FALSE	FALSE
non-targeting_00355	non-targeting	pool1	-0.233	0.108	0.806	0.641402	FALSE	FALSE
non-targeting_00355	non-targeting	pool2	-0.747	0.363	0.699	0.655721	FALSE	FALSE
non-targeting_00356	non-targeting	pool1	3.456	-0.11	0.002	0.998957	FALSE	FALSE
non-targeting_00356	non-targeting	pool2	4.242	0.485	0.251	0.657108	FALSE	FALSE
non-targeting_00357	non-targeting	pool1	3.582	-0.473	-0.144	0.892289	FALSE	FALSE
non-targeting_00357	non-targeting	pool2	3.391	-0.44	-0.048	0.964276	FALSE	FALSE
non-targeting_00358	non-targeting	pool1	2.242	-1.576	-0.964	0.0887717	FALSE	FALSE
non-targeting_00358	non-targeting	pool2	2.573	-1.664	-1.095	0.0253856	TRUE	FALSE
non-targeting_00359	non-targeting	pool1	3.727	0.001	0.054	0.967396	FALSE	FALSE
non-targeting_00359	non-targeting	pool2	3.96	0.306	0.109	0.88662	FALSE	FALSE
non-targeting_00360	non-targeting	pool1	4.242	-0.248	-0.101	0.914897	FALSE	FALSE
non-targeting_00360	non-targeting	pool2	4.359	-0.039	0.138	0.826612	FALSE	FALSE
non-targeting_00361	non-targeting	pool1	3.839	0.195	0.136	0.88575	FALSE	FALSE
non-targeting_00361	non-targeting	pool2	3.844	-0.307	-0.399	0.447809	FALSE	FALSE
non-targeting_00362	non-targeting	pool1	3.981	-0.385	-0.159	0.853267	FALSE	FALSE
non-targeting_00362	non-targeting	pool2	3.726	-0.164	0.036	0.97273	FALSE	FALSE
non-targeting_00363	non-targeting	pool1	3.743	0.304	0.236	0.791574	FALSE	FALSE
non-targeting_00363	non-targeting	pool2	3.685	0.33	0.371	0.494081	FALSE	FALSE
non-targeting_00364	non-targeting	pool1	2.813	0.059	0.153	0.922736	FALSE	FALSE
non-targeting_00364	non-targeting	pool2	1.863	-0.8	-0.292	0.803521	FALSE	FALSE
non-targeting_00365	non-targeting	pool1	4.284	-0.124	-0.151	0.844612	FALSE	FALSE
non-targeting_00365	non-targeting	pool2	4.071	-0.098	0.082	0.913967	FALSE	FALSE
non-targeting_00366	non-targeting	pool1	3.786	0.138	-0.022	0.989409	FALSE	FALSE
non-targeting_00366	non-targeting	pool2	3.9	0.044	0.089	0.910062	FALSE	FALSE
non-targeting_00367	non-targeting	pool1	4.096	0.284	0.286	0.64036	FALSE	FALSE
non-targeting_00367	non-targeting	pool2	3.954	0.167	0.102	0.902016	FALSE	FALSE
non-targeting_00368	non-targeting	pool1	3.785	-0.102	-0.076	0.957618	FALSE	FALSE
non-targeting_00368	non-targeting	pool2	3.886	0.2	0.228	0.730026	FALSE	FALSE
non-targeting_00369	non-targeting	pool1	3.832	-0.073	0.095	0.936942	FALSE	FALSE
non-targeting_00369	non-targeting	pool2	3.986	0.053	0.084	0.911466	FALSE	FALSE
non-targeting_00370	non-targeting	pool1	4.423	0.064	-0.059	0.956683	FALSE	FALSE
non-targeting_00370	non-targeting	pool2	4.218	0.106	0.09	0.897401	FALSE	FALSE
non-targeting_00371	non-targeting	pool1	3.927	0	-0.046	0.97132	FALSE	FALSE
non-targeting_00371	non-targeting	pool2	3.752	-0.049	0.106	0.935121	FALSE	FALSE
non-targeting_00372	non-targeting	pool1	3.835	0.227	0.201	0.843565	FALSE	FALSE
non-targeting_00372	non-targeting	pool2	3.962	0.542	0.643	0.047382	FALSE	TRUE
non-targeting_00373	non-targeting	pool1	3.568	-0.195	-0.247	0.77647	FALSE	FALSE
non-targeting_00373	non-targeting	pool2	3.478	0.03	0.129	0.881767	FALSE	FALSE
non-targeting_00374	non-targeting	pool1	3.51	0.147	0.662	0.114787	FALSE	FALSE
non-targeting_00374	non-targeting	pool2	3.172	-0.473	-0.251	0.753986	FALSE	FALSE
non-targeting_00375	non-targeting	pool1	4.213	0.214	0.224	0.747537	FALSE	FALSE
non-targeting_00375	non-targeting	pool2	4.242	-0.068	-0.1	0.891559	FALSE	FALSE
non-targeting_00376	non-targeting	pool1	4.511	0.178	0.299	0.532536	FALSE	FALSE
non-targeting_00376	non-targeting	pool2	4.371	0.065	0.126	0.83539	FALSE	FALSE
non-targeting_00377	non-targeting	pool1	3.723	-0.122	0.011	0.993874	FALSE	FALSE
non-targeting_00377	non-targeting	pool2	3.376	-0.428	-0.348	0.626882	FALSE	FALSE
non-targeting_00378	non-targeting	pool1	3.914	0.085	0.224	0.761889	FALSE	FALSE
non-targeting_00378	non-targeting	pool2	3.652	0.012	0.187	0.788381	FALSE	FALSE
non-targeting_00379	non-targeting	pool1	4.758	0.123	0.193	0.755117	FALSE	FALSE
non-targeting_00379	non-targeting	pool2	4.449	0.125	0.218	0.647968	FALSE	FALSE
non-targeting_00380	non-targeting	pool1	4.068	-0.005	0	0.999981	FALSE	FALSE
non-targeting_00380	non-targeting	pool2	4.1	0.012	-0.165	0.798234	FALSE	FALSE
non-targeting_00381	non-targeting	pool1	3.138	-0.108	-0.095	0.948468	FALSE	FALSE
non-targeting_00381	non-targeting	pool2	3.338	0.263	0.441	0.496555	FALSE	FALSE
non-targeting_00382	non-targeting	pool1	1.746	-0.512	-0.58	0.603039	FALSE	FALSE
non-targeting_00382	non-targeting	pool2	2.046	0.494	0.721	0.334599	FALSE	FALSE
non-targeting_00383	non-targeting	pool1	3.841	0.26	0.176	0.853267	FALSE	FALSE
non-targeting_00383	non-targeting	pool2	4.087	0.728	0.495	0.217994	FALSE	FALSE
non-targeting_00384	non-targeting	pool1	4.022	-0.239	-0.25	0.716171	FALSE	FALSE
non-targeting_00384	non-targeting	pool2	3.998	0.063	0.214	0.733561	FALSE	FALSE
non-targeting_00385	non-targeting	pool1	3.859	-0.168	-0.312	0.616312	FALSE	FALSE
non-targeting_00385	non-targeting	pool2	3.577	-0.105	-0.249	0.721898	FALSE	FALSE
non-targeting_00386	non-targeting	pool1	3.787	-0.314	-0.247	0.758167	FALSE	FALSE
non-targeting_00386	non-targeting	pool2	3.42	-0.305	-0.267	0.70647	FALSE	FALSE
non-targeting_00387	non-targeting	pool1	3.538	-0.465	-0.48	0.390824	FALSE	FALSE
non-targeting_00387	non-targeting	pool2	3.72	-0.119	-0.138	0.854275	FALSE	FALSE
non-targeting_00388	non-targeting	pool1	4.116	-0.646	-0.2	0.786468	FALSE	FALSE
non-targeting_00388	non-targeting	pool2	4.366	-0.061	0.02	0.983148	FALSE	FALSE
non-targeting_00389	non-targeting	pool1	4.242	-0.061	-0.061	0.955753	FALSE	FALSE
non-targeting_00389	non-targeting	pool2	4.394	0.131	0.026	0.973031	FALSE	FALSE
non-targeting_00390	non-targeting	pool1	4.05	-0.289	-0.393	0.45375	FALSE	FALSE
non-targeting_00390	non-targeting	pool2	3.981	0.048	0.042	0.963444	FALSE	FALSE
non-targeting_00391	non-targeting	pool1	3.563	-0.29	-0.002	0.998984	FALSE	FALSE
non-targeting_00391	non-targeting	pool2	3.819	-0.03	-0.09	0.92922	FALSE	FALSE
non-targeting_00392	non-targeting	pool1	3.639	-0.075	-0.217	0.806083	FALSE	FALSE
non-targeting_00392	non-targeting	pool2	3.836	-0.117	-0.201	0.808872	FALSE	FALSE
non-targeting_00393	non-targeting	pool1	2.898	0.364	0.44	0.665768	FALSE	FALSE
non-targeting_00393	non-targeting	pool2	2.579	-0.06	0.328	0.796237	FALSE	FALSE
non-targeting_00394	non-targeting	pool1	4.672	0.448	0.298	0.544672	FALSE	FALSE
non-targeting_00394	non-targeting	pool2	4.488	0.311	0.039	0.959873	FALSE	FALSE
non-targeting_00395	non-targeting	pool1	2.924	-0.483	-0.015	0.993874	FALSE	FALSE
non-targeting_00395	non-targeting	pool2	2.689	-0.943	-0.527	0.459196	FALSE	FALSE
non-targeting_00396	non-targeting	pool1	4.332	0.016	-0.006	0.996328	FALSE	FALSE
non-targeting_00396	non-targeting	pool2	4.307	0.011	0.062	0.95041	FALSE	FALSE
non-targeting_00397	non-targeting	pool1	3.758	-0.18	-0.136	0.891879	FALSE	FALSE
non-targeting_00397	non-targeting	pool2	2.929	-0.621	-0.072	0.950451	FALSE	FALSE
non-targeting_00398	non-targeting	pool1	3.084	-0.431	-0.113	0.937853	FALSE	FALSE
non-targeting_00398	non-targeting	pool2	3.551	-0.244	-0.22	0.752536	FALSE	FALSE
non-targeting_00399	non-targeting	pool1	4.381	-0.188	-0.123	0.896349	FALSE	FALSE
non-targeting_00399	non-targeting	pool2	4.277	-0.186	-0.047	0.95303	FALSE	FALSE
non-targeting_00400	non-targeting	pool1	3.464	0.321	0.407	0.546377	FALSE	FALSE
non-targeting_00400	non-targeting	pool2	2.759	-1.083	-0.875	0.0716122	FALSE	FALSE
non-targeting_00401	non-targeting	pool1	4.034	-0.359	-0.328	0.556141	FALSE	FALSE
non-targeting_00401	non-targeting	pool2	3.977	-0.32	-0.154	0.831631	FALSE	FALSE
non-targeting_00402	non-targeting	pool1	4.324	-0.101	-0.173	0.811306	FALSE	FALSE
non-targeting_00402	non-targeting	pool2	4.397	-0.141	-0.054	0.951624	FALSE	FALSE
non-targeting_00403	non-targeting	pool1	4.009	0.066	0.299	0.655723	FALSE	FALSE
non-targeting_00403	non-targeting	pool2	3.939	0.075	0.015	0.988767	FALSE	FALSE
non-targeting_00404	non-targeting	pool1	2.911	-0.001	0.304	0.787862	FALSE	FALSE
non-targeting_00404	non-targeting	pool2	3.231	-0.09	-0.195	0.827575	FALSE	FALSE
non-targeting_00405	non-targeting	pool1	3.155	0.177	-0.244	0.822004	FALSE	FALSE
non-targeting_00405	non-targeting	pool2	2.951	0.42	0.669	0.209345	FALSE	FALSE
non-targeting_00406	non-targeting	pool1	4.338	0.206	0.328	0.542829	FALSE	FALSE
non-targeting_00406	non-targeting	pool2	3.816	-0.433	-0.452	0.320737	FALSE	FALSE
non-targeting_00407	non-targeting	pool1	4.442	0.278	0.26	0.63009	FALSE	FALSE
non-targeting_00407	non-targeting	pool2	4.413	0.379	0.236	0.650235	FALSE	FALSE
non-targeting_00408	non-targeting	pool1	3.982	-0.161	-0.038	0.976663	FALSE	FALSE
non-targeting_00408	non-targeting	pool2	4.013	-0.271	-0.44	0.273771	FALSE	FALSE
non-targeting_00409	non-targeting	pool1	4.12	-0.204	-0.098	0.92311	FALSE	FALSE
non-targeting_00409	non-targeting	pool2	3.82	-0.322	-0.178	0.803431	FALSE	FALSE
non-targeting_00410	non-targeting	pool1	3.72	-0.009	0.306	0.665151	FALSE	FALSE
non-targeting_00410	non-targeting	pool2	3.324	-0.298	0.044	0.967042	FALSE	FALSE
non-targeting_00411	non-targeting	pool1	4.326	0.059	-0.026	0.981918	FALSE	FALSE
non-targeting_00411	non-targeting	pool2	3.934	-0.29	-0.343	0.476792	FALSE	FALSE
non-targeting_00412	non-targeting	pool1	3.961	-0.519	-0.331	0.564816	FALSE	FALSE
non-targeting_00412	non-targeting	pool2	3.587	-0.608	-0.227	0.737101	FALSE	FALSE
non-targeting_00413	non-targeting	pool1	3.308	-0.106	0.371	0.622952	FALSE	FALSE
non-targeting_00413	non-targeting	pool2	3.561	-0.371	-0.388	0.461559	FALSE	FALSE
non-targeting_00414	non-targeting	pool1	2.872	-0.386	0.146	0.924876	FALSE	FALSE
non-targeting_00414	non-targeting	pool2	3.043	-0.46	0.152	0.879163	FALSE	FALSE
non-targeting_00415	non-targeting	pool1	2.149	-0.177	0.014	0.995043	FALSE	FALSE
non-targeting_00415	non-targeting	pool2	1.485	-1.109	-0.793	0.305891	FALSE	FALSE
non-targeting_00416	non-targeting	pool1	4.67	-0.128	-0.001	0.999101	FALSE	FALSE
non-targeting_00416	non-targeting	pool2	4.431	-0.192	-0.021	0.980911	FALSE	FALSE
non-targeting_00417	non-targeting	pool1	4.121	0.245	0.127	0.886473	FALSE	FALSE
non-targeting_00417	non-targeting	pool2	4.045	0.07	0.061	0.942753	FALSE	FALSE
non-targeting_00418	non-targeting	pool1	3.709	-0.32	-0.251	0.740606	FALSE	FALSE
non-targeting_00418	non-targeting	pool2	3.901	-0.013	0.056	0.952538	FALSE	FALSE
non-targeting_00419	non-targeting	pool1	4.058	-0.03	-0.029	0.981921	FALSE	FALSE
non-targeting_00419	non-targeting	pool2	4.341	0.355	0.193	0.714973	FALSE	FALSE
non-targeting_00420	non-targeting	pool1	4.792	0.344	0.42	0.288559	FALSE	FALSE
non-targeting_00420	non-targeting	pool2	4.27	-0.011	-0.006	0.994432	FALSE	FALSE
non-targeting_00421	non-targeting	pool1	2.711	-0.21	0.019	0.992706	FALSE	FALSE
non-targeting_00421	non-targeting	pool2	2.222	-0.593	-0.186	0.883857	FALSE	FALSE
non-targeting_00422	non-targeting	pool1	1.329	-0.652	-0.151	0.96645	FALSE	FALSE
non-targeting_00422	non-targeting	pool2	1.35	0.15	-0.496	0.633051	FALSE	FALSE
non-targeting_00423	non-targeting	pool1	3.239	0.299	0.165	0.899198	FALSE	FALSE
non-targeting_00423	non-targeting	pool2	2.908	-0.177	-0.225	0.811438	FALSE	FALSE
non-targeting_00424	non-targeting	pool1	4.19	0.376	0.258	0.761337	FALSE	FALSE
non-targeting_00424	non-targeting	pool2	4.067	0.303	0.263	0.631298	FALSE	FALSE
non-targeting_00425	non-targeting	pool1	4.748	0.273	0.062	0.948877	FALSE	FALSE
non-targeting_00425	non-targeting	pool2	5.14	0.525	0.409	0.22378	FALSE	FALSE
non-targeting_00426	non-targeting	pool1	2.445	-0.326	0.159	0.9368	FALSE	FALSE
non-targeting_00426	non-targeting	pool2	2.747	-0.076	-0.025	0.984977	FALSE	FALSE
non-targeting_00427	non-targeting	pool1	4.241	-0.224	-0.34	0.501723	FALSE	FALSE
non-targeting_00427	non-targeting	pool2	4.239	0.021	0.057	0.941481	FALSE	FALSE
non-targeting_00428	non-targeting	pool1	4.391	0.122	0.267	0.699828	FALSE	FALSE
non-targeting_00428	non-targeting	pool2	3.763	-0.33	-0.103	0.899623	FALSE	FALSE
non-targeting_00429	non-targeting	pool1	3.638	-0.32	-0.385	0.540214	FALSE	FALSE
non-targeting_00429	non-targeting	pool2	3.887	-0.08	-0.04	0.965661	FALSE	FALSE
non-targeting_00430	non-targeting	pool1	3.915	-0.065	0.037	0.97914	FALSE	FALSE
non-targeting_00430	non-targeting	pool2	4.109	-0.361	-0.353	0.477047	FALSE	FALSE
non-targeting_00431	non-targeting	pool1	3.59	-0.056	0.021	0.990671	FALSE	FALSE
non-targeting_00431	non-targeting	pool2	3.55	0.168	0.457	0.379068	FALSE	FALSE
non-targeting_00432	non-targeting	pool1	4.48	0.103	-0.048	0.966403	FALSE	FALSE
non-targeting_00432	non-targeting	pool2	4.106	-0.074	-0.015	0.987044	FALSE	FALSE
non-targeting_00433	non-targeting	pool1	3.912	0.071	0.017	0.992102	FALSE	FALSE
non-targeting_00433	non-targeting	pool2	4	-0.109	-0.025	0.980449	FALSE	FALSE
non-targeting_00434	non-targeting	pool1	3.526	0.182	0.094	0.941657	FALSE	FALSE
non-targeting_00434	non-targeting	pool2	3.584	0.235	0.039	0.97107	FALSE	FALSE
non-targeting_00435	non-targeting	pool1	2.712	0.127	0.128	0.944418	FALSE	FALSE
non-targeting_00435	non-targeting	pool2	2.686	0.122	0.017	0.991669	FALSE	FALSE
non-targeting_00436	non-targeting	pool1	2.129	0.169	0.233	0.904045	FALSE	FALSE
non-targeting_00436	non-targeting	pool2	2.264	0.632	0.529	0.512581	FALSE	FALSE
non-targeting_00437	non-targeting	pool1	3.965	-0.021	0.053	0.969196	FALSE	FALSE
non-targeting_00437	non-targeting	pool2	3.874	0.002	0.035	0.970971	FALSE	FALSE
non-targeting_00438	non-targeting	pool1	3.802	-0.041	0.21	0.794126	FALSE	FALSE
non-targeting_00438	non-targeting	pool2	3.43	-0.239	-0.207	0.776159	FALSE	FALSE
non-targeting_00439	non-targeting	pool1	2.915	-0.714	-0.641	0.380957	FALSE	FALSE
non-targeting_00439	non-targeting	pool2	2.968	-0.528	-0.204	0.838797	FALSE	FALSE
non-targeting_00440	non-targeting	pool1	2.128	-0.304	-0.228	0.887997	FALSE	FALSE
non-targeting_00440	non-targeting	pool2	1.457	-0.445	-0.015	0.993032	FALSE	FALSE
non-targeting_00441	non-targeting	pool1	4.025	0.376	-0.043	0.974518	FALSE	FALSE
non-targeting_00441	non-targeting	pool2	4.577	0.586	0.302	0.438485	FALSE	FALSE
non-targeting_00442	non-targeting	pool1	3.674	-0.127	-0.335	0.653002	FALSE	FALSE
non-targeting_00442	non-targeting	pool2	3.755	-0.036	-0.128	0.88611	FALSE	FALSE
non-targeting_00443	non-targeting	pool1	3.342	-0.087	0.109	0.941428	FALSE	FALSE
non-targeting_00443	non-targeting	pool2	3.438	-0.098	0.049	0.964151	FALSE	FALSE
non-targeting_00444	non-targeting	pool1	3.476	0.175	0.109	0.946138	FALSE	FALSE
non-targeting_00444	non-targeting	pool2	3.388	-0.067	-0.062	0.951823	FALSE	FALSE
non-targeting_00445	non-targeting	pool1	4.532	0.432	0.161	0.818639	FALSE	FALSE
non-targeting_00445	non-targeting	pool2	4.581	0.473	0.263	0.548935	FALSE	FALSE
non-targeting_00446	non-targeting	pool1	3.648	0.067	0	0.999823	FALSE	FALSE
non-targeting_00446	non-targeting	pool2	3.221	-0.601	-0.683	0.145678	FALSE	FALSE
non-targeting_00447	non-targeting	pool1	4.001	0.188	0.182	0.820425	FALSE	FALSE
non-targeting_00447	non-targeting	pool2	4.305	0.685	0.311	0.465406	FALSE	FALSE
non-targeting_00448	non-targeting	pool1	4.459	0.482	0.643	0.0125264	FALSE	TRUE
non-targeting_00448	non-targeting	pool2	3.903	-0.446	-0.535	0.156799	FALSE	FALSE
non-targeting_00449	non-targeting	pool1	4.389	0.252	0.086	0.928982	FALSE	FALSE
non-targeting_00449	non-targeting	pool2	4.312	0.016	-0.185	0.75715	FALSE	FALSE
non-targeting_00450	non-targeting	pool1	4.157	0.057	0.041	0.97546	FALSE	FALSE
non-targeting_00450	non-targeting	pool2	3.824	-0.138	-0.066	0.940726	FALSE	FALSE
non-targeting_00451	non-targeting	pool1	3.306	0.02	0.088	0.953238	FALSE	FALSE
non-targeting_00451	non-targeting	pool2	3.015	-0.627	-0.468	0.627453	FALSE	FALSE
non-targeting_00452	non-targeting	pool1	3.234	-0.277	-0.152	0.899752	FALSE	FALSE
non-targeting_00452	non-targeting	pool2	3.157	-0.221	-0.01	0.992967	FALSE	FALSE
non-targeting_00453	non-targeting	pool1	4.284	0.429	0.121	0.890696	FALSE	FALSE
non-targeting_00453	non-targeting	pool2	4.087	0.162	0.008	0.993032	FALSE	FALSE
non-targeting_00454	non-targeting	pool1	3.88	-0.697	-0.538	0.343636	FALSE	FALSE
non-targeting_00454	non-targeting	pool2	3.757	-0.342	-0.015	0.988199	FALSE	FALSE
non-targeting_00455	non-targeting	pool1	4.03	-0.196	-0.218	0.774789	FALSE	FALSE
non-targeting_00455	non-targeting	pool2	4.324	-0.012	-0.06	0.938013	FALSE	FALSE
non-targeting_00456	non-targeting	pool1	4.637	0.352	0.209	0.728059	FALSE	FALSE
non-targeting_00456	non-targeting	pool2	4.223	0.16	0.175	0.818155	FALSE	FALSE
non-targeting_00457	non-targeting	pool1	3.437	-0.407	-0.39	0.595812	FALSE	FALSE
non-targeting_00457	non-targeting	pool2	3.621	-0.202	-0.31	0.679376	FALSE	FALSE
non-targeting_00458	non-targeting	pool1	3.944	0.163	0.201	0.797838	FALSE	FALSE
non-targeting_00458	non-targeting	pool2	4.254	-0.054	0.003	0.996537	FALSE	FALSE
non-targeting_00459	non-targeting	pool1	3.6	0.227	0.262	0.773632	FALSE	FALSE
non-targeting_00459	non-targeting	pool2	3.458	0.455	0.316	0.604726	FALSE	FALSE
non-targeting_00460	non-targeting	pool1	3.182	-0.176	0.069	0.967047	FALSE	FALSE
non-targeting_00460	non-targeting	pool2	3.185	-0.006	0.088	0.932125	FALSE	FALSE
non-targeting_00461	non-targeting	pool1	3.022	-0.501	-0.595	0.323306	FALSE	FALSE
non-targeting_00461	non-targeting	pool2	3.382	-0.2	-0.185	0.841352	FALSE	FALSE
non-targeting_00462	non-targeting	pool1	3.389	-0.097	-0.048	0.975032	FALSE	FALSE
non-targeting_00462	non-targeting	pool2	3.421	0.046	-0.09	0.92412	FALSE	FALSE
non-targeting_00463	non-targeting	pool1	2.956	-0.102	-0.265	0.811604	FALSE	FALSE
non-targeting_00463	non-targeting	pool2	2.761	-0.041	-0.102	0.931384	FALSE	FALSE
non-targeting_00464	non-targeting	pool1	4.142	-0.043	0.281	0.669347	FALSE	FALSE
non-targeting_00464	non-targeting	pool2	4.024	-0.284	-0.049	0.961643	FALSE	FALSE
non-targeting_00465	non-targeting	pool1	4.489	0.754	0.487	0.18331	FALSE	FALSE
non-targeting_00465	non-targeting	pool2	4.162	0.165	0.068	0.943119	FALSE	FALSE
non-targeting_00466	non-targeting	pool1	3.855	-0.201	-0.043	0.975032	FALSE	FALSE
non-targeting_00466	non-targeting	pool2	3.923	0	0.031	0.975767	FALSE	FALSE
non-targeting_00467	non-targeting	pool1	2.637	-0.137	0.443	0.627794	FALSE	FALSE
non-targeting_00467	non-targeting	pool2	2.595	-0.083	0.507	0.470053	FALSE	FALSE
non-targeting_00468	non-targeting	pool1	2.933	-0.245	-0.059	0.973143	FALSE	FALSE
non-targeting_00468	non-targeting	pool2	2.846	-0.379	-0.265	0.772383	FALSE	FALSE
non-targeting_00469	non-targeting	pool1	4.224	-0.232	-0.132	0.884084	FALSE	FALSE
non-targeting_00469	non-targeting	pool2	3.996	0.073	0.353	0.430872	FALSE	FALSE
non-targeting_00470	non-targeting	pool1	3.655	0.105	0.119	0.926023	FALSE	FALSE
non-targeting_00470	non-targeting	pool2	3.655	0.519	0.339	0.544625	FALSE	FALSE
non-targeting_00471	non-targeting	pool1	3.948	0.006	-0.034	0.980197	FALSE	FALSE
non-targeting_00471	non-targeting	pool2	3.619	0.15	0.168	0.846102	FALSE	FALSE
non-targeting_00472	non-targeting	pool1	5.123	0.347	0.098	0.900158	FALSE	FALSE
non-targeting_00472	non-targeting	pool2	5.091	0.177	0.003	0.996604	FALSE	FALSE
non-targeting_00473	non-targeting	pool1	3.302	-0.17	-0.202	0.844294	FALSE	FALSE
non-targeting_00473	non-targeting	pool2	3.299	0.165	0.139	0.875265	FALSE	FALSE
non-targeting_00474	non-targeting	pool1	3.385	-0.028	0.038	0.980666	FALSE	FALSE
non-targeting_00474	non-targeting	pool2	3.418	-0.185	-0.101	0.912337	FALSE	FALSE
non-targeting_00475	non-targeting	pool1	3.383	-0.133	-0.017	0.993401	FALSE	FALSE
non-targeting_00475	non-targeting	pool2	3.187	0.216	0.283	0.690791	FALSE	FALSE
non-targeting_00476	non-targeting	pool1	4.012	-0.083	0.133	0.884973	FALSE	FALSE
non-targeting_00476	non-targeting	pool2	4.126	0.067	-0.13	0.843374	FALSE	FALSE
non-targeting_00477	non-targeting	pool1	3.775	0.008	0.001	0.999732	FALSE	FALSE
non-targeting_00477	non-targeting	pool2	3.859	0.044	0.091	0.909282	FALSE	FALSE
non-targeting_00478	non-targeting	pool1	2.949	-0.205	-0.131	0.935207	FALSE	FALSE
non-targeting_00478	non-targeting	pool2	2.53	-0.389	0.014	0.992342	FALSE	FALSE
non-targeting_00479	non-targeting	pool1	4.615	0.15	0.158	0.825888	FALSE	FALSE
non-targeting_00479	non-targeting	pool2	4.589	0.05	0.082	0.89825	FALSE	FALSE
non-targeting_00480	non-targeting	pool1	1.528	0.206	0.422	0.761337	FALSE	FALSE
non-targeting_00480	non-targeting	pool2	1.453	-0.338	-0.917	0.226308	FALSE	FALSE
non-targeting_00481	non-targeting	pool1	3.567	-0.249	0.047	0.973717	FALSE	FALSE
non-targeting_00481	non-targeting	pool2	3.826	0.256	0.343	0.535009	FALSE	FALSE
non-targeting_00482	non-targeting	pool1	3.898	0.156	0.291	0.666763	FALSE	FALSE
non-targeting_00482	non-targeting	pool2	4.045	0.315	0.397	0.352876	FALSE	FALSE
non-targeting_00483	non-targeting	pool1	4.162	0.022	-0.152	0.859761	FALSE	FALSE
non-targeting_00483	non-targeting	pool2	4.192	0.097	0.078	0.917454	FALSE	FALSE
non-targeting_00484	non-targeting	pool1	3.591	0.019	0.009	0.995752	FALSE	FALSE
non-targeting_00484	non-targeting	pool2	4.049	0.214	0.106	0.886923	FALSE	FALSE
non-targeting_00485	non-targeting	pool1	3.925	0.219	0.162	0.871876	FALSE	FALSE
non-targeting_00485	non-targeting	pool2	3.355	0.055	0.185	0.844196	FALSE	FALSE
non-targeting_00486	non-targeting	pool1	3.822	0.18	0	0.999823	FALSE	FALSE
non-targeting_00486	non-targeting	pool2	3.89	-0.022	-0.041	0.964728	FALSE	FALSE
non-targeting_00487	non-targeting	pool1	3.929	-0.382	-0.198	0.815083	FALSE	FALSE
non-targeting_00487	non-targeting	pool2	3.809	-0.307	-0.184	0.785612	FALSE	FALSE
non-targeting_00488	non-targeting	pool1	3.704	-0.615	-0.179	0.842424	FALSE	FALSE
non-targeting_00488	non-targeting	pool2	3.354	-0.62	-0.057	0.959252	FALSE	FALSE
non-targeting_00489	non-targeting	pool1	3.718	0.026	0.303	0.674293	FALSE	FALSE
non-targeting_00489	non-targeting	pool2	3.602	-0.424	-0.505	0.290976	FALSE	FALSE
non-targeting_00490	non-targeting	pool1	3.639	0.08	-0.063	0.962758	FALSE	FALSE
non-targeting_00490	non-targeting	pool2	4.061	0.548	0.337	0.498596	FALSE	FALSE
non-targeting_00491	non-targeting	pool1	3.569	0.204	0.164	0.884477	FALSE	FALSE
non-targeting_00491	non-targeting	pool2	4.201	0.307	0.081	0.909582	FALSE	FALSE
non-targeting_00492	non-targeting	pool1	4.035	0.574	0.165	0.873829	FALSE	FALSE
non-targeting_00492	non-targeting	pool2	4.085	0.311	-0.014	0.987789	FALSE	FALSE
non-targeting_00493	non-targeting	pool1	4.246	-0.047	-0.082	0.93293	FALSE	FALSE
non-targeting_00493	non-targeting	pool2	4.366	0.138	0.11	0.867055	FALSE	FALSE
non-targeting_00494	non-targeting	pool1	3.339	-0.389	-0.306	0.714646	FALSE	FALSE
non-targeting_00494	non-targeting	pool2	3.395	-0.702	-0.479	0.370902	FALSE	FALSE
non-targeting_00495	non-targeting	pool1	4.13	0.241	-0.242	0.716163	FALSE	FALSE
non-targeting_00495	non-targeting	pool2	4.246	0.492	0.084	0.909316	FALSE	FALSE
non-targeting_00496	non-targeting	pool1	3.437	0.208	0.484	0.438495	FALSE	FALSE
non-targeting_00496	non-targeting	pool2	3.339	0.28	0.145	0.86746	FALSE	FALSE
non-targeting_00497	non-targeting	pool1	3.853	0.076	0.196	0.807524	FALSE	FALSE
non-targeting_00497	non-targeting	pool2	3.948	-0.041	-0.082	0.917712	FALSE	FALSE
non-targeting_00498	non-targeting	pool1	3.678	-0.194	-0.3	0.667262	FALSE	FALSE
non-targeting_00498	non-targeting	pool2	3.972	0.068	0.124	0.868033	FALSE	FALSE
non-targeting_00499	non-targeting	pool1	4.592	0.553	0.425	0.495267	FALSE	FALSE
non-targeting_00499	non-targeting	pool2	3.773	-0.049	-0.001	0.998588	FALSE	FALSE
non-targeting_00500	non-targeting	pool1	3.501	0.111	0.054	0.97161	FALSE	FALSE
non-targeting_00500	non-targeting	pool2	3.132	-0.004	0.051	0.965369	FALSE	FALSE

## Sheet: S4.2
identifier	pool	chrom	start	end	logCPM_day21_vs_day07	log2FC_vs_lib_day21	log2FC_day21_vs_day07	FDR_day21_vs_day07	Exhausted	Expanded
SIDV3-Region_chr1:923441-923461	pool1	chr1	923441	923461	4.589	0.229	-0.028	0.981852	FALSE	FALSE
SIDV3-Region_chr1:923568-923588	pool1	chr1	923568	923588	3.88	0.328	0.42	0.402216	FALSE	FALSE
SIDV3-Region_chr1:923689-923709	pool1	chr1	923689	923709	3.836	0.416	0.516	0.280397	FALSE	FALSE
SIDV3-Region_chr1:923820-923840	pool1	chr1	923820	923840	3.996	0.143	-0.029	0.981773	FALSE	FALSE
SIDV3-Region_chr1:923880-923900	pool1	chr1	923880	923900	3.855	0.165	-0.232	0.76839	FALSE	FALSE
SIDV3-Region_chr1:923932-923952	pool1	chr1	923932	923952	5.035	0.6	0.435	0.18826	FALSE	FALSE
SIDV3-Region_chr1:924007-924027	pool1	chr1	924007	924027	2.518	0.643	0.723	0.378627	FALSE	FALSE
SIDV3-Region_chr1:924127-924147	pool1	chr1	924127	924147	4.285	0.387	0.151	0.84921	FALSE	FALSE
SIDV3-Region_chr1:924223-924243	pool1	chr1	924223	924243	3.416	-0.119	0.104	0.936203	FALSE	FALSE
SIDV3-Region_chr1:924346-924366	pool1	chr1	924346	924366	3.636	-0.155	-0.242	0.783209	FALSE	FALSE
SIDV3-Region_chr1:924418-924438	pool1	chr1	924418	924438	4.161	0.167	0.075	0.945037	FALSE	FALSE
SIDV3-Region_chr1:924489-924509	pool1	chr1	924489	924509	4.332	0.339	0.072	0.943713	FALSE	FALSE
SIDV3-Region_chr1:924590-924610	pool1	chr1	924590	924610	4.188	-0.256	-0.06	0.962573	FALSE	FALSE
SIDV3-Region_chr1:924689-924709	pool1	chr1	924689	924709	4.631	-0.109	0.062	0.951167	FALSE	FALSE
SIDV3-Region_chr1:952403-952423	pool1	chr1	952403	952423	4.337	-0.024	-0.128	0.887563	FALSE	FALSE
SIDV3-Region_chr1:952707-952727	pool1	chr1	952707	952727	3.693	0.327	0.061	0.969525	FALSE	FALSE
SIDV3-Region_chr1:952796-952816	pool1	chr1	952796	952816	4.293	-0.053	0.037	0.97546	FALSE	FALSE
SIDV3-CAGE_chr1:958974-958994	pool1	chr1	958974	958994	3.968	0.055	0.066	0.958091	FALSE	FALSE
SIDV3-CAGE_chr1:959073-959093	pool1	chr1	959073	959093	3.832	-0.414	-0.334	0.593648	FALSE	FALSE
SIDV3-CAGE_chr1:959160-959180	pool1	chr1	959160	959180	3.808	-0.09	-0.168	0.879027	FALSE	FALSE
SIDV3-CAGE_chr1:959247-959267	pool1	chr1	959247	959267	3.787	-0.348	-0.497	0.311595	FALSE	FALSE
SIDV3-Region_chr1:995754-995774	pool1	chr1	995754	995774	3.864	0.036	0.034	0.980204	FALSE	FALSE
SIDV3-Region_chr1:995834-995854	pool1	chr1	995834	995854	3.724	-0.108	0.048	0.971239	FALSE	FALSE
SIDV3-Region_chr1:995946-995966	pool1	chr1	995946	995966	4.799	0.208	-0.041	0.970348	FALSE	FALSE
SIDV3-Region_chr1:996026-996046	pool1	chr1	996026	996046	3.966	0.219	0.082	0.941791	FALSE	FALSE
SIDV3-Region_chr1:996095-996115	pool1	chr1	996095	996115	4.004	0.201	0.227	0.748486	FALSE	FALSE
SIDV3-Region_chr1:996206-996226	pool1	chr1	996206	996226	4.27	0.137	0.112	0.900884	FALSE	FALSE
SIDV3-Region_chr1:996260-996280	pool1	chr1	996260	996280	3.567	0.019	0.074	0.957896	FALSE	FALSE
SIDV3-Region_chr1:998513-998533	pool1	chr1	998513	998533	3.77	-0.042	-0.042	0.977062	FALSE	FALSE
SIDV3-Region_chr1:998577-998597	pool1	chr1	998577	998597	4.06	0.13	0.303	0.602467	FALSE	FALSE
SIDV3-Region_chr1:998654-998674	pool1	chr1	998654	998674	3.17	0.152	-0.092	0.950217	FALSE	FALSE
SIDV3-Region_chr1:998791-998811	pool1	chr1	998791	998811	4.033	0.184	0.09	0.93293	FALSE	FALSE
SIDV3-Region_chr1:998887-998907	pool1	chr1	998887	998907	3.194	-0.251	-0.064	0.967331	FALSE	FALSE
SIDV3-Region_chr1:999002-999022	pool1	chr1	999002	999022	3.893	0.001	0.278	0.750747	FALSE	FALSE
SIDV3-Region_chr1:999164-999184	pool1	chr1	999164	999184	3.824	0.145	0.098	0.929788	FALSE	FALSE
SIDV3-Region_chr1:999304-999324	pool1	chr1	999304	999324	3.948	0.384	0.909	0.000914039	FALSE	TRUE
SIDV3-Region_chr1:999366-999386	pool1	chr1	999366	999386	3.586	-0.46	-0.269	0.74131	FALSE	FALSE
SIDV3-Region_chr1:999430-999450	pool1	chr1	999430	999450	4.076	0.393	0.414	0.387484	FALSE	FALSE
SIDV3-Region_chr1:999516-999536	pool1	chr1	999516	999536	4.19	-0.033	0.022	0.98693	FALSE	FALSE
SIDV3-Region_chr1:999664-999684	pool1	chr1	999664	999684	2.956	0.014	0.406	0.63009	FALSE	FALSE
SIDV3-CAGE_chr1:999763-999783	pool1	chr1	999763	999783	4.055	0.263	0.021	0.988932	FALSE	FALSE
SIDV3-Region_chr1:999775-999795	pool1	chr1	999775	999795	3.783	-0.37	-0.34	0.682037	FALSE	FALSE
SIDV3-Region_chr1:999862-999882	pool1	chr1	999862	999882	4.279	0.074	-0.074	0.944418	FALSE	FALSE
SIDV3-Region_chr1:999914-999934	pool1	chr1	999914	999934	4.655	0.156	-0.108	0.891879	FALSE	FALSE
SIDV3-Region_chr1:1000004-1000024	pool1	chr1	1000004	1000024	4.356	-0.307	-0.101	0.91033	FALSE	FALSE
SIDV3-Region_chr1:1000055-1000075	pool1	chr1	1000055	1000075	3.617	-0.45	-0.394	0.511727	FALSE	FALSE
SIDV3-Region_chr1:1000182-1000202	pool1	chr1	1000182	1000202	4.006	0.351	0.413	0.464923	FALSE	FALSE
SIDV3-Region_chr1:1081042-1081062	pool1	chr1	1081042	1081062	4.022	0.091	-0.009	0.995043	FALSE	FALSE
SIDV3-Region_chr1:1081168-1081188	pool1	chr1	1081168	1081188	4.001	0.253	0.145	0.876124	FALSE	FALSE
SIDV3-Region_chr1:1081290-1081310	pool1	chr1	1081290	1081310	4.49	0.666	0.326	0.553596	FALSE	FALSE
SIDV3-Region_chr1:1081345-1081365	pool1	chr1	1081345	1081365	3.932	-0.263	-0.058	0.963801	FALSE	FALSE
SIDV3-Region_chr1:1121354-1121374	pool1	chr1	1121354	1121374	4.12	0.049	-0.121	0.893775	FALSE	FALSE
SIDV3-Region_chr1:1121524-1121544	pool1	chr1	1121524	1121544	3.815	0.087	0.188	0.830402	FALSE	FALSE
SIDV3-Region_chr1:1121582-1121602	pool1	chr1	1121582	1121602	4.689	0.093	0.04	0.970737	FALSE	FALSE
SIDV3-Region_chr1:1121644-1121664	pool1	chr1	1121644	1121664	4.309	0.083	-0.07	0.944681	FALSE	FALSE
SIDV3-Region_chr1:1121743-1121763	pool1	chr1	1121743	1121763	4.033	0.03	0.121	0.899168	FALSE	FALSE
SIDV3-Region_chr1:1121854-1121874	pool1	chr1	1121854	1121874	4.718	0.428	0.157	0.811252	FALSE	FALSE
SIDV3-Region_chr1:1121942-1121962	pool1	chr1	1121942	1121962	4.218	0.085	0.403	0.374269	FALSE	FALSE
SIDV3-Region_chr1:1122028-1122048	pool1	chr1	1122028	1122048	4.674	0.259	0.088	0.924286	FALSE	FALSE
SIDV3-Region_chr1:1122170-1122190	pool1	chr1	1122170	1122190	4.126	-0.111	-0.21	0.764535	FALSE	FALSE
SIDV3-Region_chr1:1122227-1122247	pool1	chr1	1122227	1122247	4.133	0.004	-0.016	0.991229	FALSE	FALSE
SIDV3-Region_chr1:1122341-1122361	pool1	chr1	1122341	1122361	4.804	-0.031	-0.113	0.883355	FALSE	FALSE
SIDV3-Region_chr1:1122423-1122443	pool1	chr1	1122423	1122443	3.691	0.162	-0.036	0.980587	FALSE	FALSE
SIDV3-Region_chr1:1122489-1122509	pool1	chr1	1122489	1122509	1.722	-0.087	-0.208	0.905895	FALSE	FALSE
SIDV3-Region_chr1:1122565-1122585	pool1	chr1	1122565	1122585	3.792	-0.422	-0.343	0.574058	FALSE	FALSE
SIDV3-Region_chr1:1122675-1122695	pool1	chr1	1122675	1122695	3.349	0.043	-0.09	0.946468	FALSE	FALSE
SIDV3-Region_chr1:1122858-1122878	pool1	chr1	1122858	1122878	4.244	0.013	-0.054	0.964978	FALSE	FALSE
SIDV3-Region_chr1:1122945-1122965	pool1	chr1	1122945	1122965	3.192	0.175	0.458	0.585086	FALSE	FALSE
SIDV3-Region_chr1:1123102-1123122	pool1	chr1	1123102	1123122	4.302	0.151	0.272	0.643783	FALSE	FALSE
SIDV3-Region_chr1:1123188-1123208	pool1	chr1	1123188	1123208	3.801	0.228	0.308	0.656256	FALSE	FALSE
SIDV3-Region_chr1:1123322-1123342	pool1	chr1	1123322	1123342	3.843	-0.025	-0.116	0.909654	FALSE	FALSE
SIDV3-Region_chr1:1142522-1142542	pool1	chr1	1142522	1142542	3.866	-0.362	-0.237	0.750747	FALSE	FALSE
SIDV3-Region_chr1:1142641-1142661	pool1	chr1	1142641	1142661	4.356	0.551	0.164	0.847438	FALSE	FALSE
SIDV3-Region_chr1:1142741-1142761	pool1	chr1	1142741	1142761	4.993	0.051	-0.04	0.96922	FALSE	FALSE
SIDV3-Region_chr1:1142820-1142840	pool1	chr1	1142820	1142840	3.609	-0.157	-0.094	0.937285	FALSE	FALSE
SIDV3-Region_chr1:1143164-1143184	pool1	chr1	1143164	1143184	3.009	-1.498	-0.803	0.0939851	FALSE	FALSE
SIDV3-Region_chr1:1143222-1143242	pool1	chr1	1143222	1143242	4.406	0.764	0.727	0.0178865	FALSE	TRUE
SIDV3-Region_chr1:1143303-1143323	pool1	chr1	1143303	1143323	3.231	0.419	0.488	0.563712	FALSE	FALSE
SIDV3-Region_chr1:1143516-1143536	pool1	chr1	1143516	1143536	4.106	-0.201	-0.13	0.887084	FALSE	FALSE
SIDV3-Region_chr1:1144142-1144162	pool1	chr1	1144142	1144162	4.249	0.581	0.548	0.263158	FALSE	FALSE
SIDV3-Region_chr1:1144260-1144280	pool1	chr1	1144260	1144280	3.192	0.525	0.406	0.609209	FALSE	FALSE
SIDV3-Region_chr1:1144357-1144377	pool1	chr1	1144357	1144377	4.342	-0.222	-0.272	0.612329	FALSE	FALSE
SIDV3-Region_chr1:1144429-1144449	pool1	chr1	1144429	1144449	4.764	-0.16	-0.054	0.957162	FALSE	FALSE
SIDV3-Region_chr1:1144488-1144508	pool1	chr1	1144488	1144508	4.242	-0.02	-0.173	0.843565	FALSE	FALSE
SIDV3-Region_chr1:1144634-1144654	pool1	chr1	1144634	1144654	4.463	-0.098	-0.117	0.884084	FALSE	FALSE
SIDV3-Region_chr1:1144710-1144730	pool1	chr1	1144710	1144730	4.525	0.052	-0.086	0.92917	FALSE	FALSE
SIDV3-Region_chr1:1144796-1144816	pool1	chr1	1144796	1144816	4.42	0.155	-0.033	0.978195	FALSE	FALSE
SIDV3-Region_chr1:1144863-1144883	pool1	chr1	1144863	1144883	3.99	-0.092	-0.016	0.991314	FALSE	FALSE
SIDV3-Region_chr1:1145046-1145066	pool1	chr1	1145046	1145066	4.53	0.179	0.158	0.83515	FALSE	FALSE
SIDV3-Region_chr1:1145138-1145158	pool1	chr1	1145138	1145158	4.44	0.569	0.529	0.0796866	FALSE	FALSE
SIDV3-Region_chr1:1145259-1145279	pool1	chr1	1145259	1145279	3.858	0.322	0.134	0.893904	FALSE	FALSE
SIDV3-Region_chr1:1145394-1145414	pool1	chr1	1145394	1145414	3.982	0.599	0.12	0.906963	FALSE	FALSE
SIDV3-Region_chr1:1145464-1145484	pool1	chr1	1145464	1145484	3.895	0.195	0.239	0.743918	FALSE	FALSE
SIDV3-Region_chr1:1156146-1156166	pool1	chr1	1156146	1156166	3.944	-0.057	-0.061	0.961288	FALSE	FALSE
SIDV3-Region_chr1:1156302-1156322	pool1	chr1	1156302	1156322	4.438	0.596	0.364	0.412114	FALSE	FALSE
SIDV3-Region_chr1:1156468-1156488	pool1	chr1	1156468	1156488	3.556	0.035	0.35	0.639999	FALSE	FALSE
SIDV3-Region_chr1:1156586-1156606	pool1	chr1	1156586	1156606	3.587	-0.46	-0.387	0.533811	FALSE	FALSE
SIDV3-Region_chr1:1156998-1157018	pool1	chr1	1156998	1157018	3.905	0.126	-0.02	0.9895	FALSE	FALSE
SIDV3-Region_chr1:1157070-1157090	pool1	chr1	1157070	1157090	3.87	0.148	0.098	0.929771	FALSE	FALSE
SIDV3-Region_chr1:1157131-1157151	pool1	chr1	1157131	1157151	4.407	0.024	0.016	0.990091	FALSE	FALSE
SIDV3-Region_chr1:1157220-1157240	pool1	chr1	1157220	1157240	3.778	0.284	0.167	0.852441	FALSE	FALSE
SIDV3-Region_chr1:1157494-1157514	pool1	chr1	1157494	1157514	4.12	0.272	0.115	0.91524	FALSE	FALSE
SIDV3-Region_chr1:1157584-1157604	pool1	chr1	1157584	1157604	3.167	-0.4	-0.146	0.90692	FALSE	FALSE
SIDV3-Region_chr1:1157642-1157662	pool1	chr1	1157642	1157662	4.341	-0.011	-0.018	0.989243	FALSE	FALSE
SIDV3-Region_chr1:1157756-1157776	pool1	chr1	1157756	1157776	4.95	0.363	0.128	0.864715	FALSE	FALSE
SIDV3-Region_chr1:1157909-1157929	pool1	chr1	1157909	1157929	3.288	-0.238	-0.492	0.487254	FALSE	FALSE
SIDV3-Region_chr1:1157990-1158010	pool1	chr1	1157990	1158010	4.86	0.506	0.181	0.811989	FALSE	FALSE
SIDV3-Region_chr1:1158047-1158067	pool1	chr1	1158047	1158067	4.088	-0.078	-0.312	0.646024	FALSE	FALSE
SIDV3-Region_chr1:1158184-1158204	pool1	chr1	1158184	1158204	4.196	0.314	0.204	0.766541	FALSE	FALSE
SIDV3-Region_chr1:1158262-1158282	pool1	chr1	1158262	1158282	4.584	-0.176	-0.273	0.578905	FALSE	FALSE
SIDV3-Region_chr1:1158417-1158437	pool1	chr1	1158417	1158437	3.518	0.127	0.132	0.907327	FALSE	FALSE
SIDV3-Region_chr1:1158532-1158552	pool1	chr1	1158532	1158552	4.474	0.132	0.3	0.563685	FALSE	FALSE
SIDV3-Region_chr1:1158607-1158627	pool1	chr1	1158607	1158627	3.904	0.186	0.075	0.952288	FALSE	FALSE
SIDV3-Region_chr1:1158685-1158705	pool1	chr1	1158685	1158705	4.626	0.182	0.171	0.800383	FALSE	FALSE
SIDV3-Region_chr1:1158756-1158776	pool1	chr1	1158756	1158776	4.339	0.05	-0.016	0.990288	FALSE	FALSE
SIDV3-Region_chr1:1158846-1158866	pool1	chr1	1158846	1158866	4.265	-0.058	0.043	0.970766	FALSE	FALSE
SIDV3-Region_chr1:1158902-1158922	pool1	chr1	1158902	1158922	4.398	0.103	0.043	0.970039	FALSE	FALSE
SIDV3-Region_chr1:1162468-1162488	pool1	chr1	1162468	1162488	3.811	0.204	0.048	0.970766	FALSE	FALSE
SIDV3-Region_chr1:1162597-1162617	pool1	chr1	1162597	1162617	3.817	-0.004	0.015	0.9931	FALSE	FALSE
SIDV3-Region_chr1:1162715-1162735	pool1	chr1	1162715	1162735	4.591	0.069	-0.041	0.971117	FALSE	FALSE
SIDV3-Region_chr1:1162788-1162808	pool1	chr1	1162788	1162808	3.329	-0.368	-0.365	0.660152	FALSE	FALSE
SIDV3-Region_chr1:1162862-1162882	pool1	chr1	1162862	1162882	2.927	-0.53	-0.389	0.657157	FALSE	FALSE
SIDV3-Region_chr1:1162961-1162981	pool1	chr1	1162961	1162981	4.358	-0.184	-0.032	0.980169	FALSE	FALSE
SIDV3-Region_chr1:1163090-1163110	pool1	chr1	1163090	1163110	4.036	-0.052	0.101	0.925652	FALSE	FALSE
SIDV3-Region_chr1:1163194-1163214	pool1	chr1	1163194	1163214	3.685	-0.48	-0.34	0.595769	FALSE	FALSE
SIDV3-Region_chr1:1163319-1163339	pool1	chr1	1163319	1163339	4.574	0.023	0.044	0.967379	FALSE	FALSE
SIDV3-Region_chr1:1163390-1163410	pool1	chr1	1163390	1163410	4.492	-0.271	-0.173	0.803411	FALSE	FALSE
SIDV3-Region_chr1:1163526-1163546	pool1	chr1	1163526	1163546	4.066	-0.183	-0.156	0.87529	FALSE	FALSE
SIDV3-Region_chr1:1163584-1163604	pool1	chr1	1163584	1163604	3.911	-0.235	-0.272	0.683594	FALSE	FALSE
SIDV3-Region_chr1:1163700-1163720	pool1	chr1	1163700	1163720	3.546	-0.033	0.081	0.952152	FALSE	FALSE
SIDV3-Region_chr1:1163760-1163780	pool1	chr1	1163760	1163780	3.739	-0.338	-0.152	0.883699	FALSE	FALSE
SIDV3-Region_chr1:1164604-1164624	pool1	chr1	1164604	1164624	4.063	0.315	0.214	0.797342	FALSE	FALSE
SIDV3-Region_chr1:1164740-1164760	pool1	chr1	1164740	1164760	4.958	-0.333	-0.044	0.969224	FALSE	FALSE
SIDV3-Region_chr1:1164834-1164854	pool1	chr1	1164834	1164854	3.75	-0.127	0.084	0.944418	FALSE	FALSE
SIDV3-Region_chr1:1164956-1164976	pool1	chr1	1164956	1164976	3.844	0.139	0.233	0.775495	FALSE	FALSE
SIDV3-Region_chr1:1165016-1165036	pool1	chr1	1165016	1165036	4.216	0.161	-0.15	0.870943	FALSE	FALSE
SIDV3-Region_chr1:1165069-1165089	pool1	chr1	1165069	1165089	3.277	-0.141	-0.404	0.599414	FALSE	FALSE
SIDV3-Region_chr1:1165169-1165189	pool1	chr1	1165169	1165189	4.528	0.09	0.009	0.995252	FALSE	FALSE
SIDV3-Region_chr1:1165242-1165262	pool1	chr1	1165242	1165262	3.285	-0.118	-0.232	0.816887	FALSE	FALSE
SIDV3-Region_chr1:1165313-1165333	pool1	chr1	1165313	1165333	3.845	-0.501	-0.231	0.767434	FALSE	FALSE
SIDV3-Region_chr1:1165473-1165493	pool1	chr1	1165473	1165493	4.222	0.043	-0.17	0.843565	FALSE	FALSE
SIDV3-Region_chr1:1165586-1165606	pool1	chr1	1165586	1165606	4.094	0.311	-0.015	0.991431	FALSE	FALSE
SIDV3-Region_chr1:1283834-1283854	pool1	chr1	1283834	1283854	2.022	-0.327	-0.334	0.802478	FALSE	FALSE
SIDV3-Region_chr1:1283887-1283907	pool1	chr1	1283887	1283907	4.614	0.226	0.22	0.716338	FALSE	FALSE
SIDV3-Region_chr1:1284005-1284025	pool1	chr1	1284005	1284025	4.563	0.072	-0.041	0.969731	FALSE	FALSE
SIDV3-Region_chr1:1284237-1284257	pool1	chr1	1284237	1284257	3.694	0.077	0.217	0.792181	FALSE	FALSE
SIDV3-Region_chr1:1284750-1284770	pool1	chr1	1284750	1284770	4.41	-0.2	-0.046	0.967195	FALSE	FALSE
SIDV3-Region_chr1:1284803-1284823	pool1	chr1	1284803	1284823	4.274	-0.322	-0.01	0.993874	FALSE	FALSE
SIDV3-Region_chr1:1284959-1284979	pool1	chr1	1284959	1284979	4.03	-0.276	0.022	0.987401	FALSE	FALSE
SIDV3-Region_chr1:1285017-1285037	pool1	chr1	1285017	1285037	3.329	-0.185	-0.071	0.966858	FALSE	FALSE
SIDV3-Region_chr1:1285117-1285137	pool1	chr1	1285117	1285137	3.631	-0.213	-0.24	0.772263	FALSE	FALSE
SIDV3-Region_chr1:1285197-1285217	pool1	chr1	1285197	1285217	4.004	-0.126	0.404	0.436606	FALSE	FALSE
SIDV3-Region_chr1:1286243-1286263	pool1	chr1	1286243	1286263	4.324	0.282	0.327	0.517607	FALSE	FALSE
SIDV3-Region_chr1:1286329-1286349	pool1	chr1	1286329	1286349	3.759	-0.083	-0.11	0.918062	FALSE	FALSE
SIDV3-Region_chr1:1286421-1286441	pool1	chr1	1286421	1286441	4.344	0.468	0.16	0.833765	FALSE	FALSE
SIDV3-Region_chr1:1286535-1286555	pool1	chr1	1286535	1286555	4.113	0.429	0.164	0.841057	FALSE	FALSE
SIDV3-Region_chr1:1286596-1286616	pool1	chr1	1286596	1286616	4.384	0.361	0.195	0.790299	FALSE	FALSE
SIDV3-Region_chr1:1286652-1286672	pool1	chr1	1286652	1286672	3.611	-0.561	-0.079	0.95072	FALSE	FALSE
SIDV3-Region_chr1:1290222-1290242	pool1	chr1	1290222	1290242	4.076	0.116	0.195	0.854971	FALSE	FALSE
SIDV3-Region_chr1:1290319-1290339	pool1	chr1	1290319	1290339	3.815	0.025	-0.007	0.995999	FALSE	FALSE
SIDV3-Region_chr1:1290385-1290405	pool1	chr1	1290385	1290405	3.94	-0.263	-0.079	0.94592	FALSE	FALSE
SIDV3-Region_chr1:1290558-1290578	pool1	chr1	1290558	1290578	3.81	0.191	-0.108	0.928982	FALSE	FALSE
SIDV3-Region_chr1:1291789-1291809	pool1	chr1	1291789	1291809	3.147	-0.189	-0.304	0.793751	FALSE	FALSE
SIDV3-Region_chr1:1291842-1291862	pool1	chr1	1291842	1291862	4.342	0.231	-0.026	0.984503	FALSE	FALSE
SIDV3-Region_chr1:1291982-1292002	pool1	chr1	1291982	1292002	4.41	-0.1	0.075	0.936937	FALSE	FALSE
SIDV3-Region_chr1:1292113-1292133	pool1	chr1	1292113	1292133	3.97	-0.075	0.023	0.986838	FALSE	FALSE
SIDV3-Region_chr1:1292188-1292208	pool1	chr1	1292188	1292208	3.489	-0.156	-0.232	0.804379	FALSE	FALSE
SIDV3-Region_chr1:1300373-1300393	pool1	chr1	1300373	1300393	4.198	-0.019	0.11	0.913282	FALSE	FALSE
SIDV3-Region_chr1:1300459-1300479	pool1	chr1	1300459	1300479	3.785	-0.092	0.106	0.92311	FALSE	FALSE
SIDV3-Region_chr1:1300567-1300587	pool1	chr1	1300567	1300587	3.591	-0.117	0.063	0.963264	FALSE	FALSE
SIDV3-Region_chr1:1300642-1300662	pool1	chr1	1300642	1300662	3.062	-0.093	0.173	0.900884	FALSE	FALSE
SIDV3-Region_chr1:1302670-1302690	pool1	chr1	1302670	1302690	4.663	0.368	0.131	0.877661	FALSE	FALSE
SIDV3-Region_chr1:1302732-1302752	pool1	chr1	1302732	1302752	3.76	-0.391	-0.487	0.295784	FALSE	FALSE
SIDV3-Region_chr1:1302798-1302818	pool1	chr1	1302798	1302818	3.691	-0.066	-0.355	0.57444	FALSE	FALSE
SIDV3-Region_chr1:1302914-1302934	pool1	chr1	1302914	1302934	4.034	0.232	0.133	0.888182	FALSE	FALSE
SIDV3-Region_chr1:1302986-1303006	pool1	chr1	1302986	1303006	4.305	0.166	0.235	0.743593	FALSE	FALSE
SIDV3-Region_chr1:1303047-1303067	pool1	chr1	1303047	1303067	3.812	-0.087	0.011	0.993874	FALSE	FALSE
SIDV3-Region_chr1:1305230-1305250	pool1	chr1	1305230	1305250	3.693	0.118	0.22	0.809446	FALSE	FALSE
SIDV3-Region_chr1:1305439-1305459	pool1	chr1	1305439	1305459	3.927	-0.29	-0.003	0.998308	FALSE	FALSE
SIDV3-Region_chr1:1305596-1305616	pool1	chr1	1305596	1305616	4.273	-0.225	-0.114	0.900158	FALSE	FALSE
SIDV3-Region_chr1:1306044-1306064	pool1	chr1	1306044	1306064	2.567	-0.206	-0.114	0.945144	FALSE	FALSE
SIDV3-Region_chr1:1306180-1306200	pool1	chr1	1306180	1306200	3.228	0.073	0.061	0.972351	FALSE	FALSE
SIDV3-Region_chr1:1306256-1306276	pool1	chr1	1306256	1306276	4.264	0.036	0.003	0.997777	FALSE	FALSE
SIDV3-Region_chr1:1306310-1306330	pool1	chr1	1306310	1306330	3.564	0.344	0.398	0.583144	FALSE	FALSE
SIDV3-CAGE_chr1:1307616-1307636	pool1	chr1	1307616	1307636	3.778	0.263	-0.047	0.976296	FALSE	FALSE
SIDV3-CAGE_chr1:1307695-1307715	pool1	chr1	1307695	1307715	3.841	0.371	0.033	0.980361	FALSE	FALSE
SIDV3-CAGE_chr1:1307756-1307776	pool1	chr1	1307756	1307776	4.031	0.312	0.1	0.927547	FALSE	FALSE
SIDV3-CAGE_chr1:1307872-1307892	pool1	chr1	1307872	1307892	4.063	0.159	0.308	0.638193	FALSE	FALSE
SIDV3-Region_chr1:1308348-1308368	pool1	chr1	1308348	1308368	3.817	-0.463	-0.29	0.707681	FALSE	FALSE
SIDV3-Region_chr1:1308446-1308466	pool1	chr1	1308446	1308466	3.673	-0.738	-0.429	0.442916	FALSE	FALSE
SIDV3-CAGE_chr1:1308520-1308540	pool1	chr1	1308520	1308540	3.985	0.118	-0.017	0.990796	FALSE	FALSE
SIDV3-Region_chr1:1308578-1308598	pool1	chr1	1308578	1308598	3.866	-0.006	0.199	0.819524	FALSE	FALSE
SIDV3-Region_chr1:1308658-1308678	pool1	chr1	1308658	1308678	3.722	-0.247	-0.144	0.886619	FALSE	FALSE
SIDV3-Region_chr1:1308791-1308811	pool1	chr1	1308791	1308811	3.834	0.17	-0.053	0.971117	FALSE	FALSE
SIDV3-CAGE_chr1:1308885-1308905	pool1	chr1	1308885	1308905	4.278	0.391	0.316	0.690913	FALSE	FALSE
SIDV3-Region_chr1:1310100-1310120	pool1	chr1	1310100	1310120	4.06	0.211	0.317	0.58142	FALSE	FALSE
SIDV3-Region_chr1:1310219-1310239	pool1	chr1	1310219	1310239	3.25	0.133	0.186	0.863094	FALSE	FALSE
SIDV3-Region_chr1:1310339-1310359	pool1	chr1	1310339	1310359	4.544	0.273	0.092	0.91831	FALSE	FALSE
SIDV3-Region_chr1:1312769-1312789	pool1	chr1	1312769	1312789	4.188	-0.142	-0.135	0.875486	FALSE	FALSE
SIDV3-Region_chr1:1312834-1312854	pool1	chr1	1312834	1312854	4.045	-0.258	-0.316	0.591568	FALSE	FALSE
SIDV3-Region_chr1:1312893-1312913	pool1	chr1	1312893	1312913	4.751	-0.061	-0.063	0.950053	FALSE	FALSE
SIDV3-Region_chr1:1313048-1313068	pool1	chr1	1313048	1313068	3.953	-0.15	-0.189	0.857391	FALSE	FALSE
SIDV3-Region_chr1:1313197-1313217	pool1	chr1	1313197	1313217	3.743	0.052	0.099	0.932102	FALSE	FALSE
SIDV3-CAGE_chr1:1324368-1324388	pool1	chr1	1324368	1324388	4.158	-0.194	-0.154	0.865996	FALSE	FALSE
SIDV3-CAGE_chr1:1324434-1324454	pool1	chr1	1324434	1324454	3.726	-0.447	-0.373	0.527079	FALSE	FALSE
SIDV3-CAGE_chr1:1324525-1324545	pool1	chr1	1324525	1324545	3.998	-0.319	-0.035	0.979234	FALSE	FALSE
SIDV3-CAGE_chr1:1324626-1324646	pool1	chr1	1324626	1324646	3.809	0.331	0.26	0.713489	FALSE	FALSE
SIDV3-CAGE_chr1:1324728-1324748	pool1	chr1	1324728	1324748	4.739	0.407	0.254	0.632992	FALSE	FALSE
SIDV3-Region_chr1:1332094-1332114	pool1	chr1	1332094	1332114	4.726	-0.274	-0.207	0.749209	FALSE	FALSE
SIDV3-Region_chr1:1332196-1332216	pool1	chr1	1332196	1332216	4.391	0.15	0.166	0.816942	FALSE	FALSE
SIDV3-Region_chr1:1332357-1332377	pool1	chr1	1332357	1332377	4.025	0.318	-0.026	0.983522	FALSE	FALSE
SIDV3-Region_chr1:1332454-1332474	pool1	chr1	1332454	1332474	4.563	0.164	0.231	0.681125	FALSE	FALSE
SIDV3-Region_chr1:1343928-1343948	pool1	chr1	1343928	1343948	3.787	0.428	0.407	0.459336	FALSE	FALSE
SIDV3-Region_chr1:1344213-1344233	pool1	chr1	1344213	1344233	3.806	0.135	0.185	0.836654	FALSE	FALSE
SIDV3-Region_chr1:1344312-1344332	pool1	chr1	1344312	1344332	4.082	0.121	0.119	0.897809	FALSE	FALSE
SIDV3-CAGE_chr1:1349100-1349120	pool1	chr1	1349100	1349120	3.325	-0.208	-0.169	0.876355	FALSE	FALSE
SIDV3-CAGE_chr1:1349157-1349177	pool1	chr1	1349157	1349177	4.151	0.159	0.179	0.824086	FALSE	FALSE
SIDV3-CAGE_chr1:1349273-1349293	pool1	chr1	1349273	1349293	4.459	0.212	0.188	0.805237	FALSE	FALSE
SIDV3-CAGE_chr1:1349350-1349370	pool1	chr1	1349350	1349370	4.217	-0.014	0.127	0.885116	FALSE	FALSE
SIDV3-Region_chr1:1349719-1349739	pool1	chr1	1349719	1349739	4.441	0.048	0.09	0.919711	FALSE	FALSE
SIDV3-Region_chr1:1349853-1349873	pool1	chr1	1349853	1349873	3.718	0.042	0.145	0.906439	FALSE	FALSE
SIDV3-Region_chr1:1349929-1349949	pool1	chr1	1349929	1349949	3.801	-0.379	-0.306	0.632992	FALSE	FALSE
SIDV3-Region_chr1:1354612-1354632	pool1	chr1	1354612	1354632	3.999	-0.363	-0.34	0.566738	FALSE	FALSE
SIDV3-Region_chr1:1354698-1354718	pool1	chr1	1354698	1354718	4.238	0.345	0.404	0.371172	FALSE	FALSE
SIDV3-Region_chr1:1354783-1354803	pool1	chr1	1354783	1354803	4.162	0.261	0.408	0.462568	FALSE	FALSE
SIDV3-Region_chr1:1354900-1354920	pool1	chr1	1354900	1354920	4.234	0.144	0.287	0.615601	FALSE	FALSE
SIDV3-Region_chr1:1355020-1355040	pool1	chr1	1355020	1355040	3.933	-0.101	0.055	0.966209	FALSE	FALSE
SIDV3-Region_chr1:1361904-1361924	pool1	chr1	1361904	1361924	4.469	-0.055	0.091	0.918062	FALSE	FALSE
SIDV3-Region_chr1:1362034-1362054	pool1	chr1	1362034	1362054	4.695	0.378	0.034	0.975032	FALSE	FALSE
SIDV3-Region_chr1:1362090-1362110	pool1	chr1	1362090	1362110	5.006	0.311	0.136	0.8485	FALSE	FALSE
SIDV3-Region_chr1:1362170-1362190	pool1	chr1	1362170	1362190	4.674	-0.129	-0.264	0.607886	FALSE	FALSE
SIDV3-Region_chr1:1362355-1362375	pool1	chr1	1362355	1362375	3.207	0.2	0.262	0.781919	FALSE	FALSE
SIDV3-Region_chr1:1364361-1364381	pool1	chr1	1364361	1364381	4.014	0.296	0.084	0.937225	FALSE	FALSE
SIDV3-Region_chr1:1364435-1364455	pool1	chr1	1364435	1364455	4.73	-0.32	-0.145	0.84696	FALSE	FALSE
SIDV3-Region_chr1:1364494-1364514	pool1	chr1	1364494	1364514	4.529	0.28	-0.017	0.989243	FALSE	FALSE
SIDV3-Region_chr1:1364545-1364565	pool1	chr1	1364545	1364565	4.189	0.129	0.047	0.968782	FALSE	FALSE
SIDV3-Region_chr1:1372011-1372031	pool1	chr1	1372011	1372031	4.089	0.041	-0.041	0.978402	FALSE	FALSE
SIDV3-Region_chr1:1372283-1372303	pool1	chr1	1372283	1372303	3.125	-0.256	-0.319	0.738056	FALSE	FALSE
SIDV3-Region_chr1:1372407-1372427	pool1	chr1	1372407	1372427	4.45	-0.138	-0.092	0.917197	FALSE	FALSE
SIDV3-Region_chr1:1374226-1374246	pool1	chr1	1374226	1374246	4.112	-0.193	-0.317	0.599414	FALSE	FALSE
SIDV3-Region_chr1:1374322-1374342	pool1	chr1	1374322	1374342	4.207	-0.065	-0.081	0.939642	FALSE	FALSE
SIDV3-Region_chr1:1374411-1374431	pool1	chr1	1374411	1374431	4.775	0.359	0.079	0.930493	FALSE	FALSE
SIDV3-Region_chr1:1374465-1374485	pool1	chr1	1374465	1374485	4.378	0.46	0.53	0.0944767	FALSE	FALSE
SIDV3-Region_chr1:1374574-1374594	pool1	chr1	1374574	1374594	4.064	-0.225	0.043	0.97177	FALSE	FALSE
SIDV3-Region_chr1:1374632-1374652	pool1	chr1	1374632	1374652	3.013	-0.067	-0.116	0.935378	FALSE	FALSE
SIDV3-Region_chr1:1374799-1374819	pool1	chr1	1374799	1374819	3.992	-0.229	-0.005	0.997537	FALSE	FALSE
SIDV3-Region_chr1:1374871-1374891	pool1	chr1	1374871	1374891	3.881	0.11	0.334	0.619705	FALSE	FALSE
SIDV3-Region_chr1:1374931-1374951	pool1	chr1	1374931	1374951	4.209	-0.147	-0.102	0.920148	FALSE	FALSE
SIDV3-Region_chr1:1374993-1375013	pool1	chr1	1374993	1375013	3.555	-0.144	0.156	0.909938	FALSE	FALSE
SIDV3-Region_chr1:1375114-1375134	pool1	chr1	1375114	1375134	4.037	0.224	0.314	0.587947	FALSE	FALSE
SIDV3-Region_chr1:1375187-1375207	pool1	chr1	1375187	1375207	4.205	0.347	0.094	0.925109	FALSE	FALSE
SIDV3-Region_chr1:1375239-1375259	pool1	chr1	1375239	1375259	4.094	0.185	0.365	0.492343	FALSE	FALSE
SIDV3-Region_chr1:1375362-1375382	pool1	chr1	1375362	1375382	3.753	-0.063	-0.268	0.71407	FALSE	FALSE
SIDV3-Region_chr1:1375434-1375454	pool1	chr1	1375434	1375454	3.204	0.235	0.153	0.907303	FALSE	FALSE
SIDV3-Region_chr1:1376269-1376289	pool1	chr1	1376269	1376289	3.189	-0.379	0.017	0.992087	FALSE	FALSE
SIDV3-Region_chr1:1376329-1376349	pool1	chr1	1376329	1376349	3.643	-0.166	-0.232	0.804942	FALSE	FALSE
SIDV3-Region_chr1:1376414-1376434	pool1	chr1	1376414	1376434	3.684	0.041	0.285	0.69979	FALSE	FALSE
SIDV3-Region_chr1:1376514-1376534	pool1	chr1	1376514	1376534	4.107	0.116	0.238	0.718809	FALSE	FALSE
SIDV3-Region_chr1:1376661-1376681	pool1	chr1	1376661	1376681	2.717	-0.51	-0.036	0.985328	FALSE	FALSE
SIDV3-Region_chr1:1376735-1376755	pool1	chr1	1376735	1376755	3.878	0.06	0.174	0.849829	FALSE	FALSE
SIDV3-Region_chr1:1383953-1383973	pool1	chr1	1383953	1383973	5.086	0.567	0.319	0.511842	FALSE	FALSE
SIDV3-Region_chr1:1384019-1384039	pool1	chr1	1384019	1384039	4.114	-0.331	-0.285	0.672964	FALSE	FALSE
SIDV3-Region_chr1:1384077-1384097	pool1	chr1	1384077	1384097	4.518	-0.052	-0.12	0.883699	FALSE	FALSE
SIDV3-Region_chr1:1384135-1384155	pool1	chr1	1384135	1384155	5.202	0.415	0.105	0.8948	FALSE	FALSE
SIDV3-Region_chr1:1384198-1384218	pool1	chr1	1384198	1384218	3.965	-0.026	0.072	0.949961	FALSE	FALSE
SIDV3-Region_chr1:1390537-1390557	pool1	chr1	1390537	1390557	4.142	-0.162	-0.384	0.46047	FALSE	FALSE
SIDV3-Region_chr1:1390690-1390710	pool1	chr1	1390690	1390710	1.565	-1.043	-0.006	0.998721	FALSE	FALSE
SIDV3-Region_chr1:1390767-1390787	pool1	chr1	1390767	1390787	4.763	0.47	-0.033	0.975666	FALSE	FALSE
SIDV3-CAGE_chr1:1399047-1399067	pool1	chr1	1399047	1399067	3.853	0.385	0.34	0.65019	FALSE	FALSE
SIDV3-CAGE_chr1:1399106-1399126	pool1	chr1	1399106	1399126	4.727	-0.133	-0.103	0.899408	FALSE	FALSE
SIDV3-CAGE_chr1:1399176-1399196	pool1	chr1	1399176	1399196	3.777	0.212	0.317	0.620491	FALSE	FALSE
SIDV3-CAGE_chr1:1399251-1399271	pool1	chr1	1399251	1399271	4.101	0.263	0.392	0.416742	FALSE	FALSE
SIDV3-CAGE_chr1:1399302-1399322	pool1	chr1	1399302	1399322	3.98	-0.152	-0.148	0.868708	FALSE	FALSE
SIDV3-CAGE_chr1:1399380-1399400	pool1	chr1	1399380	1399400	3.866	-0.219	-0.213	0.781733	FALSE	FALSE
SIDV3-Region_chr1:1536557-1536577	pool1	chr1	1536557	1536577	4	0.054	-0.144	0.873801	FALSE	FALSE
SIDV3-Region_chr1:1536680-1536700	pool1	chr1	1536680	1536700	4.406	0.256	0.261	0.701563	FALSE	FALSE
SIDV3-Region_chr1:1536807-1536827	pool1	chr1	1536807	1536827	3.872	0.042	0.016	0.991561	FALSE	FALSE
SIDV3-Region_chr1:1536915-1536935	pool1	chr1	1536915	1536935	4.089	-0.336	-0.328	0.543603	FALSE	FALSE
SIDV3-Region_chr1:1781328-1781348	pool1	chr1	1781328	1781348	4.583	-0.091	0.087	0.922675	FALSE	FALSE
SIDV3-Region_chr1:1781427-1781447	pool1	chr1	1781427	1781447	4.194	0.583	0.15	0.880245	FALSE	FALSE
SIDV3-Region_chr1:1781486-1781506	pool1	chr1	1781486	1781506	2.939	-0.049	0.054	0.97546	FALSE	FALSE
SIDV3-Region_chr1:1782202-1782222	pool1	chr1	1782202	1782222	4.496	0.363	0.126	0.868734	FALSE	FALSE
SIDV3-Region_chr1:1782265-1782285	pool1	chr1	1782265	1782285	4.161	0.084	0.128	0.884737	FALSE	FALSE
SIDV3-Region_chr1:1782348-1782368	pool1	chr1	1782348	1782368	3.898	-0.052	-0.01	0.994755	FALSE	FALSE
SIDV3-Region_chr1:1782422-1782442	pool1	chr1	1782422	1782442	4.01	-0.399	-0.143	0.884477	FALSE	FALSE
SIDV3-Region_chr1:1782479-1782499	pool1	chr1	1782479	1782499	4.703	-0.094	-0.029	0.979555	FALSE	FALSE
SIDV3-Region_chr1:1782557-1782577	pool1	chr1	1782557	1782577	4.752	0.48	0.122	0.888615	FALSE	FALSE
SIDV3-Region_chr1:1782643-1782663	pool1	chr1	1782643	1782663	4.389	0.123	0.173	0.804484	FALSE	FALSE
SIDV3-Region_chr1:1782694-1782714	pool1	chr1	1782694	1782714	4.329	-0.063	0.088	0.928747	FALSE	FALSE
SIDV3-Region_chr1:1782788-1782808	pool1	chr1	1782788	1782808	2.484	-0.208	0.122	0.944013	FALSE	FALSE
SIDV3-Region_chr1:1782894-1782914	pool1	chr1	1782894	1782914	4.433	0.466	0.361	0.405951	FALSE	FALSE
SIDV3-Region_chr1:1783055-1783075	pool1	chr1	1783055	1783075	3.694	-0.248	-0.196	0.85436	FALSE	FALSE
SIDV3-Region_chr1:1783108-1783128	pool1	chr1	1783108	1783128	4.659	0.083	0.092	0.914603	FALSE	FALSE
SIDV3-Region_chr1:1783232-1783252	pool1	chr1	1783232	1783252	3.403	0.142	0.288	0.73799	FALSE	FALSE
SIDV3-Region_chr1:1889832-1889852	pool1	chr1	1889832	1889852	4.513	-0.382	0.037	0.974792	FALSE	FALSE
SIDV3-Region_chr1:1889959-1889979	pool1	chr1	1889959	1889979	4.45	-0.164	-0.202	0.759529	FALSE	FALSE
SIDV3-Region_chr1:1890036-1890056	pool1	chr1	1890036	1890056	3.838	0.456	0.319	0.623232	FALSE	FALSE
SIDV3-Region_chr1:1890087-1890107	pool1	chr1	1890087	1890107	2.723	-0.299	-0.047	0.9802	FALSE	FALSE
SIDV3-Region_chr1:1890253-1890273	pool1	chr1	1890253	1890273	2.302	0.098	0.688	0.361396	FALSE	FALSE
SIDV3-CAGE_chr1:1890812-1890832	pool1	chr1	1890812	1890832	4.206	0.038	-0.065	0.954457	FALSE	FALSE
SIDV3-CAGE_chr1:1890941-1890961	pool1	chr1	1890941	1890961	3.997	-0.014	-0.006	0.997827	FALSE	FALSE
SIDV3-CAGE_chr1:1891035-1891055	pool1	chr1	1891035	1891055	3.772	0.221	0.079	0.952768	FALSE	FALSE
SIDV3-CAGE_chr1:1891109-1891129	pool1	chr1	1891109	1891129	4.091	-0.194	-0.311	0.643783	FALSE	FALSE
SIDV3-Region_chr1:1899121-1899141	pool1	chr1	1899121	1899141	2.434	-0.332	-0.011	0.995999	FALSE	FALSE
SIDV3-Region_chr1:1899258-1899278	pool1	chr1	1899258	1899278	4.122	0.034	-0.087	0.932899	FALSE	FALSE
SIDV3-Region_chr1:1899318-1899338	pool1	chr1	1899318	1899338	3.561	-0.502	-0.232	0.830351	FALSE	FALSE
SIDV3-Region_chr1:1899398-1899418	pool1	chr1	1899398	1899418	4.288	0.587	0.492	0.256595	FALSE	FALSE
SIDV3-Region_chr1:1899470-1899490	pool1	chr1	1899470	1899490	4.349	0.05	0.071	0.944781	FALSE	FALSE
SIDV3-Region_chr1:1899551-1899571	pool1	chr1	1899551	1899571	4.206	0.114	-0.1	0.922469	FALSE	FALSE
SIDV3-Region_chr1:1906298-1906318	pool1	chr1	1906298	1906318	3.192	-0.29	-0.019	0.991664	FALSE	FALSE
SIDV3-Region_chr1:1906366-1906386	pool1	chr1	1906366	1906386	4.034	-0.411	-0.127	0.894753	FALSE	FALSE
SIDV3-Region_chr1:1906517-1906537	pool1	chr1	1906517	1906537	4.676	0.003	-0.04	0.970413	FALSE	FALSE
SIDV3-Region_chr1:1907236-1907256	pool1	chr1	1907236	1907256	3.454	-0.467	-0.599	0.264103	FALSE	FALSE
SIDV3-Region_chr1:1907313-1907333	pool1	chr1	1907313	1907333	3.598	-0.463	-0.024	0.98907	FALSE	FALSE
SIDV3-Region_chr1:1907606-1907626	pool1	chr1	1907606	1907626	4.273	0.055	0.011	0.993808	FALSE	FALSE
SIDV3-Region_chr1:1908906-1908926	pool1	chr1	1908906	1908926	3.989	0.137	0.325	0.680951	FALSE	FALSE
SIDV3-Region_chr1:1908960-1908980	pool1	chr1	1908960	1908980	3.974	-0.11	-0.407	0.40642	FALSE	FALSE
SIDV3-Region_chr1:1909019-1909039	pool1	chr1	1909019	1909039	5.281	0.375	0.3	0.526333	FALSE	FALSE
SIDV3-Region_chr1:1909107-1909127	pool1	chr1	1909107	1909127	4.072	-0.008	-0.14	0.880591	FALSE	FALSE
SIDV3-Region_chr1:1909208-1909228	pool1	chr1	1909208	1909228	3.481	-0.034	-0.303	0.744232	FALSE	FALSE
SIDV3-Region_chr1:1909271-1909291	pool1	chr1	1909271	1909291	3.279	-0.572	-0.305	0.720435	FALSE	FALSE
SIDV3-Region_chr1:1909339-1909359	pool1	chr1	1909339	1909359	4.314	-0.426	-0.179	0.798015	FALSE	FALSE
SIDV3-Region_chr1:1918858-1918878	pool1	chr1	1918858	1918878	4.274	0.222	0.119	0.919711	FALSE	FALSE
SIDV3-Region_chr1:1918984-1919004	pool1	chr1	1918984	1919004	4.593	0.598	0.313	0.545584	FALSE	FALSE
SIDV3-Region_chr1:1919111-1919131	pool1	chr1	1919111	1919131	3.686	-0.187	-0.337	0.650862	FALSE	FALSE
SIDV3-Region_chr1:1919171-1919191	pool1	chr1	1919171	1919191	3.394	-1.4	-0.975	0.020524	TRUE	FALSE
SIDV3-Region_chr1:1919223-1919243	pool1	chr1	1919223	1919243	4.22	-0.008	0.06	0.961858	FALSE	FALSE
SIDV3-CAGE_chr1:1919336-1919356	pool1	chr1	1919336	1919356	4.252	0.166	-0.144	0.865911	FALSE	FALSE
SIDV3-Region_chr1:1923579-1923599	pool1	chr1	1923579	1923599	4.027	0.189	0.013	0.993107	FALSE	FALSE
SIDV3-Region_chr1:1923645-1923665	pool1	chr1	1923645	1923665	4.349	0.32	0.109	0.899115	FALSE	FALSE
SIDV3-Region_chr1:1923708-1923728	pool1	chr1	1923708	1923728	4.019	-0.213	-0.038	0.978402	FALSE	FALSE
SIDV3-Region_chr1:1923776-1923796	pool1	chr1	1923776	1923796	4.059	0.455	0.335	0.571305	FALSE	FALSE
SIDV3-Region_chr1:1923864-1923884	pool1	chr1	1923864	1923884	4.232	-0.111	-0.109	0.911255	FALSE	FALSE
SIDV3-Region_chr1:1923923-1923943	pool1	chr1	1923923	1923943	3.512	-0.833	-0.84	0.0309768	TRUE	FALSE
SIDV3-Region_chr1:1923994-1924014	pool1	chr1	1923994	1924014	3.775	-0.148	-0.306	0.646119	FALSE	FALSE
SIDV3-Region_chr1:1941639-1941659	pool1	chr1	1941639	1941659	3.514	0.078	0.164	0.872019	FALSE	FALSE
SIDV3-Region_chr1:1941722-1941742	pool1	chr1	1941722	1941742	4.694	0.171	0.073	0.939027	FALSE	FALSE
SIDV3-Region_chr1:1941876-1941896	pool1	chr1	1941876	1941896	3.753	-0.24	-0.151	0.873701	FALSE	FALSE
SIDV3-Region_chr1:1941989-1942009	pool1	chr1	1941989	1942009	4.154	-0.054	0.213	0.771234	FALSE	FALSE
SIDV3-Region_chr1:1942070-1942090	pool1	chr1	1942070	1942090	3.367	0.077	0.317	0.697069	FALSE	FALSE
SIDV3-Region_chr1:1943991-1944011	pool1	chr1	1943991	1944011	4.517	-0.015	-0.12	0.891314	FALSE	FALSE
SIDV3-Region_chr1:1944139-1944159	pool1	chr1	1944139	1944159	4.28	-0.036	0.129	0.927328	FALSE	FALSE
SIDV3-Region_chr1:1944391-1944411	pool1	chr1	1944391	1944411	2.538	0.133	-0.069	0.971239	FALSE	FALSE
SIDV3-Region_chr1:1955228-1955248	pool1	chr1	1955228	1955248	3.716	-0.468	-0.185	0.846632	FALSE	FALSE
SIDV3-Region_chr1:1955292-1955312	pool1	chr1	1955292	1955312	3.843	0.172	0.202	0.809228	FALSE	FALSE
SIDV3-Region_chr1:1955381-1955401	pool1	chr1	1955381	1955401	4.173	0.174	0.052	0.972174	FALSE	FALSE
SIDV3-Region_chr1:1955553-1955573	pool1	chr1	1955553	1955573	3.983	-0.291	-0.267	0.712805	FALSE	FALSE
SIDV3-Region_chr1:1955739-1955759	pool1	chr1	1955739	1955759	4.292	0.431	0.112	0.913434	FALSE	FALSE
SIDV3-Region_chr1:1955852-1955872	pool1	chr1	1955852	1955872	2.573	-0.549	-0.189	0.899198	FALSE	FALSE
SIDV3-Region_chr1:1955906-1955926	pool1	chr1	1955906	1955926	4.308	0.251	0.11	0.923554	FALSE	FALSE
SIDV3-Region_chr1:1955982-1956002	pool1	chr1	1955982	1956002	4.201	-0.136	0.016	0.990306	FALSE	FALSE
SIDV3-Region_chr1:2049192-2049212	pool1	chr1	2049192	2049212	2.899	-0.52	-0.085	0.964479	FALSE	FALSE
SIDV3-Region_chr1:2049279-2049299	pool1	chr1	2049279	2049299	3.297	0.044	0.164	0.893904	FALSE	FALSE
SIDV3-Region_chr1:2049353-2049373	pool1	chr1	2049353	2049373	3.653	-0.195	-0.042	0.976456	FALSE	FALSE
SIDV3-Region_chr1:2049451-2049471	pool1	chr1	2049451	2049471	3.87	0.113	0.172	0.846215	FALSE	FALSE
SIDV3-Region_chr1:2049536-2049556	pool1	chr1	2049536	2049556	3.908	0.162	0.179	0.836701	FALSE	FALSE
SIDV3-Region_chr1:2373911-2373931	pool1	chr1	2373911	2373931	4.455	-0.018	0.056	0.959053	FALSE	FALSE
SIDV3-Region_chr1:2374122-2374142	pool1	chr1	2374122	2374142	3.56	0.004	-0.09	0.941961	FALSE	FALSE
SIDV3-Region_chr1:2374174-2374194	pool1	chr1	2374174	2374194	3.393	0.196	-0.065	0.966447	FALSE	FALSE
SIDV3-Region_chr1:2374250-2374270	pool1	chr1	2374250	2374270	4.121	-0.107	-0.158	0.857994	FALSE	FALSE
SIDV3-Region_chr1:2381173-2381193	pool1	chr1	2381173	2381193	4.469	0.49	0.534	0.0774495	FALSE	FALSE
SIDV3-Region_chr1:2381225-2381245	pool1	chr1	2381225	2381245	4.165	0.487	0.311	0.571305	FALSE	FALSE
SIDV3-Region_chr1:2381315-2381335	pool1	chr1	2381315	2381335	3.706	-0.272	-0.231	0.780225	FALSE	FALSE
SIDV3-Region_chr1:2381379-2381399	pool1	chr1	2381379	2381399	3.636	0.091	-0.016	0.991561	FALSE	FALSE
SIDV3-Region_chr1:2381505-2381525	pool1	chr1	2381505	2381525	4.267	0.425	0.189	0.806083	FALSE	FALSE
SIDV3-Region_chr1:2381594-2381614	pool1	chr1	2381594	2381614	1.508	-0.928	-0.451	0.767775	FALSE	FALSE
SIDV3-Region_chr1:2381730-2381750	pool1	chr1	2381730	2381750	3.846	0.311	0.249	0.745396	FALSE	FALSE
SIDV3-Region_chr1:2381815-2381835	pool1	chr1	2381815	2381835	3.423	0.335	0.003	0.998517	FALSE	FALSE
SIDV3-Region_chr1:2381922-2381942	pool1	chr1	2381922	2381942	4.538	-0.252	-0.138	0.850031	FALSE	FALSE
SIDV3-Region_chr1:2382021-2382041	pool1	chr1	2382021	2382041	4.281	-0.372	-0.324	0.519233	FALSE	FALSE
SIDV3-Region_chr1:2384927-2384947	pool1	chr1	2384927	2384947	3.844	-0.492	-0.35	0.602058	FALSE	FALSE
SIDV3-Region_chr1:2385047-2385067	pool1	chr1	2385047	2385067	3.685	-0.336	-0.193	0.8334	FALSE	FALSE
SIDV3-Region_chr1:2385142-2385162	pool1	chr1	2385142	2385162	3.545	-0.484	-0.651	0.112186	FALSE	FALSE
SIDV3-Region_chr1:2385223-2385243	pool1	chr1	2385223	2385243	3.563	-0.081	0.113	0.932107	FALSE	FALSE
SIDV3-Region_chr1:2385328-2385348	pool1	chr1	2385328	2385348	4.036	0.081	0.055	0.963264	FALSE	FALSE
SIDV3-CAGE_chr1:2391262-2391282	pool1	chr1	2391262	2391282	3.705	-0.373	-0.202	0.818192	FALSE	FALSE
SIDV3-CAGE_chr1:2391328-2391348	pool1	chr1	2391328	2391348	3.889	0.159	-0.054	0.969224	FALSE	FALSE
SIDV3-CAGE_chr1:2391398-2391418	pool1	chr1	2391398	2391418	4.053	-0.162	-0.058	0.965926	FALSE	FALSE
SIDV3-CAGE_chr1:2391497-2391517	pool1	chr1	2391497	2391517	4.388	-0.038	0.105	0.904778	FALSE	FALSE
SIDV3-Region_chr1:2391575-2391595	pool1	chr1	2391575	2391595	4.05	0.683	0.422	0.414686	FALSE	FALSE
SIDV3-Region_chr1:2391629-2391649	pool1	chr1	2391629	2391649	3.393	-0.256	0.038	0.9802	FALSE	FALSE
SIDV3-Region_chr1:2391686-2391706	pool1	chr1	2391686	2391706	2.853	-0.1	-0.031	0.986838	FALSE	FALSE
SIDV3-Region_chr1:2391779-2391799	pool1	chr1	2391779	2391799	4.451	0.091	0.072	0.942437	FALSE	FALSE
SIDV3-Region_chr1:2391897-2391917	pool1	chr1	2391897	2391917	3.511	0.019	0.057	0.971431	FALSE	FALSE
SIDV3-Region_chr1:2391971-2391991	pool1	chr1	2391971	2391991	3.928	-0.323	-0.064	0.958961	FALSE	FALSE
SIDV3-CAGE_chr1:2392057-2392077	pool1	chr1	2392057	2392077	3.667	-0.072	-0.325	0.640942	FALSE	FALSE
SIDV3-Region_chr1:2408490-2408510	pool1	chr1	2408490	2408510	3.633	-0.156	0.005	0.997537	FALSE	FALSE
SIDV3-Region_chr1:2408606-2408626	pool1	chr1	2408606	2408626	4.422	-0.044	0.01	0.993874	FALSE	FALSE
SIDV3-Region_chr1:2408667-2408687	pool1	chr1	2408667	2408687	4.109	-0.145	0.017	0.990745	FALSE	FALSE
SIDV3-Region_chr1:2408756-2408776	pool1	chr1	2408756	2408776	4.403	-0.114	-0.112	0.914405	FALSE	FALSE
SIDV3-Region_chr1:2408882-2408902	pool1	chr1	2408882	2408902	4.14	0.287	0.147	0.862748	FALSE	FALSE
SIDV3-Region_chr1:2411928-2411948	pool1	chr1	2411928	2411948	3.892	0.461	0.549	0.187543	FALSE	FALSE
SIDV3-Region_chr1:2412084-2412104	pool1	chr1	2412084	2412104	3.713	-0.017	-0.194	0.831776	FALSE	FALSE
SIDV3-Region_chr1:2412148-2412168	pool1	chr1	2412148	2412168	4.123	-0.12	-0.045	0.970766	FALSE	FALSE
SIDV3-Region_chr1:2412231-2412251	pool1	chr1	2412231	2412251	3.873	0.07	0.096	0.928747	FALSE	FALSE
SIDV3-CAGE_chr1:2412273-2412293	pool1	chr1	2412273	2412293	3.537	0.32	0.171	0.866336	FALSE	FALSE
SIDV3-Region_chr1:2412324-2412344	pool1	chr1	2412324	2412344	4.452	0.115	0.101	0.90692	FALSE	FALSE
SIDV3-Region_chr1:2412417-2412437	pool1	chr1	2412417	2412437	3.553	0.25	0.45	0.488314	FALSE	FALSE
SIDV3-Region_chr1:2412495-2412515	pool1	chr1	2412495	2412515	4.208	0.163	0.128	0.888177	FALSE	FALSE
SIDV3-Region_chr1:2412547-2412567	pool1	chr1	2412547	2412567	3.412	0.384	0.447	0.514743	FALSE	FALSE
SIDV3-CAGE_chr1:2412603-2412623	pool1	chr1	2412603	2412623	4.556	-0.036	-0.018	0.990091	FALSE	FALSE
SIDV3-Region_chr1:2413014-2413034	pool1	chr1	2413014	2413034	3.242	0.23	0.146	0.907303	FALSE	FALSE
SIDV3-Region_chr1:2413082-2413102	pool1	chr1	2413082	2413102	3.978	0.254	-0.005	0.99739	FALSE	FALSE
SIDV3-Region_chr1:2413138-2413158	pool1	chr1	2413138	2413158	4.108	0.106	-0.007	0.995305	FALSE	FALSE
SIDV3-Region_chr1:2413252-2413272	pool1	chr1	2413252	2413272	4.235	-0.424	-0.602	0.0806845	FALSE	FALSE
SIDV3-Region_chr1:2413333-2413353	pool1	chr1	2413333	2413353	4.116	-0.197	-0.034	0.97929	FALSE	FALSE
SIDV3-Region_chr1:2414401-2414421	pool1	chr1	2414401	2414421	3.71	0.393	0.157	0.879419	FALSE	FALSE
SIDV3-Region_chr1:2414460-2414480	pool1	chr1	2414460	2414480	4.197	0.013	-0.115	0.897883	FALSE	FALSE
SIDV3-Region_chr1:2414590-2414610	pool1	chr1	2414590	2414610	3.633	-0.708	-0.723	0.0431331	TRUE	FALSE
SIDV3-Region_chr1:2414667-2414687	pool1	chr1	2414667	2414687	4.113	0.279	0.11	0.91033	FALSE	FALSE
SIDV3-Region_chr1:2415423-2415443	pool1	chr1	2415423	2415443	3.718	0.231	0.155	0.873966	FALSE	FALSE
SIDV3-Region_chr1:2415507-2415527	pool1	chr1	2415507	2415527	4.418	0.011	-0.081	0.92917	FALSE	FALSE
SIDV3-Region_chr1:2415592-2415612	pool1	chr1	2415592	2415612	4.54	-0.148	-0.244	0.650021	FALSE	FALSE
SIDV3-Region_chr1:2415816-2415836	pool1	chr1	2415816	2415836	3.599	-0.363	-0.161	0.872537	FALSE	FALSE
SIDV3-Region_chr1:2415929-2415949	pool1	chr1	2415929	2415949	3.504	-0.535	-0.471	0.498552	FALSE	FALSE
SIDV3-Region_chr1:2416008-2416028	pool1	chr1	2416008	2416028	3.086	-0.35	-0.076	0.963264	FALSE	FALSE
SIDV3-Region_chr1:2416059-2416079	pool1	chr1	2416059	2416079	3.426	0.056	0.12	0.923817	FALSE	FALSE
SIDV3-Region_chr1:2416168-2416188	pool1	chr1	2416168	2416188	3.82	-0.071	0.063	0.963264	FALSE	FALSE
SIDV3-Region_chr1:2416332-2416352	pool1	chr1	2416332	2416352	2.676	-0.173	-0.581	0.434655	FALSE	FALSE
SIDV3-Region_chr1:2430160-2430180	pool1	chr1	2430160	2430180	4.058	-0.609	-0.207	0.791727	FALSE	FALSE
SIDV3-Region_chr1:2430266-2430286	pool1	chr1	2430266	2430286	3.819	0.125	0.232	0.775988	FALSE	FALSE
SIDV3-Region_chr1:2430339-2430359	pool1	chr1	2430339	2430359	4.046	0.156	0.276	0.721122	FALSE	FALSE
SIDV3-Region_chr1:2528009-2528029	pool1	chr1	2528009	2528029	4.532	-0.12	-0.077	0.934287	FALSE	FALSE
SIDV3-Region_chr1:2528126-2528146	pool1	chr1	2528126	2528146	4.278	0.423	0.232	0.738056	FALSE	FALSE
SIDV3-Region_chr1:2528177-2528197	pool1	chr1	2528177	2528197	3.543	-0.114	-0.019	0.990671	FALSE	FALSE
SIDV3-Region_chr1:2528354-2528374	pool1	chr1	2528354	2528374	3.542	-0.068	0.018	0.991158	FALSE	FALSE
SIDV3-Region_chr1:2528988-2529008	pool1	chr1	2528988	2529008	3.963	-0.13	-0.044	0.972234	FALSE	FALSE
SIDV3-Region_chr1:2529105-2529125	pool1	chr1	2529105	2529125	2.63	0.064	0.586	0.486579	FALSE	FALSE
SIDV3-Region_chr1:2529173-2529193	pool1	chr1	2529173	2529193	3.591	-0.223	-0.356	0.645542	FALSE	FALSE
SIDV3-Region_chr1:2529261-2529281	pool1	chr1	2529261	2529281	3.253	-0.104	-0.447	0.527876	FALSE	FALSE
SIDV3-Region_chr1:2529317-2529337	pool1	chr1	2529317	2529337	4.468	0.368	0.116	0.88513	FALSE	FALSE
SIDV3-Region_chr1:2529368-2529388	pool1	chr1	2529368	2529388	3.886	-1.291	-1.423	2.13751e-09	TRUE	FALSE
SIDV3-Region_chr1:2529430-2529450	pool1	chr1	2529430	2529450	3.873	-0.709	-0.346	0.571305	FALSE	FALSE
SIDV3-Region_chr1:2529522-2529542	pool1	chr1	2529522	2529542	3.464	-0.298	-0.029	0.986514	FALSE	FALSE
SIDV3-Region_chr1:2529627-2529647	pool1	chr1	2529627	2529647	4.35	0.041	-0.179	0.818536	FALSE	FALSE
SIDV3-Region_chr1:2542989-2543009	pool1	chr1	2542989	2543009	3.51	0.347	0.15	0.895566	FALSE	FALSE
SIDV3-Region_chr1:2543127-2543147	pool1	chr1	2543127	2543147	4.247	0.347	0.444	0.287264	FALSE	FALSE
SIDV3-Region_chr1:2543206-2543226	pool1	chr1	2543206	2543226	3.841	-0.109	-0.209	0.795877	FALSE	FALSE
SIDV3-Region_chr1:2543321-2543341	pool1	chr1	2543321	2543341	3.887	0.212	0.192	0.845582	FALSE	FALSE
SIDV3-Region_chr1:2543382-2543402	pool1	chr1	2543382	2543402	4.807	0.096	0.167	0.792847	FALSE	FALSE
SIDV3-Region_chr1:2543569-2543589	pool1	chr1	2543569	2543589	3.995	-0.214	-0.474	0.317985	FALSE	FALSE
SIDV3-Region_chr1:2543634-2543654	pool1	chr1	2543634	2543654	4.153	-0.275	-0.183	0.804484	FALSE	FALSE
SIDV3-Region_chr1:2543778-2543798	pool1	chr1	2543778	2543798	4.084	-0.404	-0.223	0.760286	FALSE	FALSE
SIDV3-Region_chr1:2543846-2543866	pool1	chr1	2543846	2543866	3.911	0.44	0.152	0.86641	FALSE	FALSE
SIDV3-Region_chr1:2543910-2543930	pool1	chr1	2543910	2543930	4.487	0.041	0.055	0.961288	FALSE	FALSE
SIDV3-Region_chr1:2543982-2544002	pool1	chr1	2543982	2544002	3.773	-0.335	-0.158	0.862993	FALSE	FALSE
SIDV3-Region_chr1:2544081-2544101	pool1	chr1	2544081	2544101	3.855	-0.174	-0.263	0.70494	FALSE	FALSE
SIDV3-Region_chr1:2544152-2544172	pool1	chr1	2544152	2544172	4.748	0.109	0	0.999732	FALSE	FALSE
SIDV3-Region_chr1:2544262-2544282	pool1	chr1	2544262	2544282	4.237	0.201	0.233	0.721544	FALSE	FALSE
SIDV3-Region_chr1:2544387-2544407	pool1	chr1	2544387	2544407	4.239	0.703	0.512	0.252538	FALSE	FALSE
SIDV3-Region_chr1:2544455-2544475	pool1	chr1	2544455	2544475	3.715	0.397	0.349	0.566776	FALSE	FALSE
SIDV3-Region_chr1:2544594-2544614	pool1	chr1	2544594	2544614	4.041	0.379	0.211	0.784934	FALSE	FALSE
SIDV3-Region_chr1:2544776-2544796	pool1	chr1	2544776	2544796	3.859	0.251	0.13	0.89741	FALSE	FALSE
SIDV3-Region_chr1:2544840-2544860	pool1	chr1	2544840	2544860	4.16	0.662	0.402	0.442385	FALSE	FALSE
SIDV3-Region_chr1:2544908-2544928	pool1	chr1	2544908	2544928	4.96	0.517	0.439	0.218531	FALSE	FALSE
SIDV3-Region_chr1:2544974-2544994	pool1	chr1	2544974	2544994	4.516	0.174	0.109	0.892742	FALSE	FALSE
SIDV3-Region_chr1:2545187-2545207	pool1	chr1	2545187	2545207	4.693	0.392	0.244	0.680752	FALSE	FALSE
SIDV3-Region_chr1:2556385-2556405	pool1	chr1	2556385	2556405	4.044	0.422	0.288	0.647575	FALSE	FALSE
SIDV3-Region_chr1:2556437-2556457	pool1	chr1	2556437	2556457	4.728	0.514	0.293	0.564864	FALSE	FALSE
SIDV3-Region_chr1:2556521-2556541	pool1	chr1	2556521	2556541	3.483	-0.258	-0.084	0.951072	FALSE	FALSE
SIDV3-Region_chr1:2556573-2556593	pool1	chr1	2556573	2556593	4.524	-0.1	0.071	0.938046	FALSE	FALSE
SIDV3-Region_chr1:2556719-2556739	pool1	chr1	2556719	2556739	4.301	-0.065	-0.06	0.963008	FALSE	FALSE
SIDV3-Region_chr1:2556818-2556838	pool1	chr1	2556818	2556838	3.939	-0.128	-0.141	0.876321	FALSE	FALSE
SIDV3-Region_chr1:2556957-2556977	pool1	chr1	2556957	2556977	3.81	0.547	0.417	0.467162	FALSE	FALSE
SIDV3-CAGE_chr1:2592651-2592671	pool1	chr1	2592651	2592671	4.075	0.284	0.085	0.952077	FALSE	FALSE
SIDV3-Region_chr1:2592669-2592689	pool1	chr1	2592669	2592689	4.419	-0.056	0.045	0.968447	FALSE	FALSE
SIDV3-CAGE_chr1:2592708-2592728	pool1	chr1	2592708	2592728	4.153	-0.563	-0.219	0.746996	FALSE	FALSE
SIDV3-Region_chr1:2592948-2592968	pool1	chr1	2592948	2592968	4.482	0.079	0.204	0.758167	FALSE	FALSE
SIDV3-Region_chr1:2593068-2593088	pool1	chr1	2593068	2593088	3.935	-0.336	-0.151	0.865325	FALSE	FALSE
SIDV3-Region_chr1:2593927-2593947	pool1	chr1	2593927	2593947	3.752	0.639	0.65	0.198153	FALSE	FALSE
SIDV3-Region_chr1:2594199-2594219	pool1	chr1	2594199	2594219	4.693	0.203	0.149	0.827178	FALSE	FALSE
SIDV3-Region_chr1:2594263-2594283	pool1	chr1	2594263	2594283	3.025	-0.258	-0.044	0.98021	FALSE	FALSE
SIDV3-Region_chr1:2594423-2594443	pool1	chr1	2594423	2594443	3.944	0.062	-0.16	0.860666	FALSE	FALSE
SIDV3-Region_chr1:2594554-2594574	pool1	chr1	2594554	2594574	3.787	0.189	-0.287	0.721419	FALSE	FALSE
SIDV3-CAGE_chr1:3531130-3531150	pool1	chr1	3531130	3531150	4.367	0.136	0.264	0.643783	FALSE	FALSE
SIDV3-CAGE_chr1:3531220-3531240	pool1	chr1	3531220	3531240	3.134	-0.613	-0.312	0.764905	FALSE	FALSE
SIDV3-CAGE_chr1:3531282-3531302	pool1	chr1	3531282	3531302	4.355	0.028	0.139	0.86115	FALSE	FALSE
SIDV3-CAGE_chr1:3531333-3531353	pool1	chr1	3531333	3531353	3.342	-0.144	0.16	0.895416	FALSE	FALSE
SIDV3-CAGE_chr1:3531426-3531446	pool1	chr1	3531426	3531446	2.764	-0.406	0.23	0.861311	FALSE	FALSE
SIDV3-Region_chr1:3583948-3583968	pool1	chr1	3583948	3583968	4.129	0.061	0	1	FALSE	FALSE
SIDV3-Region_chr1:3584047-3584067	pool1	chr1	3584047	3584067	3.295	0.132	0.376	0.607264	FALSE	FALSE
SIDV3-Region_chr1:3584116-3584136	pool1	chr1	3584116	3584136	4.356	-0.336	-0.286	0.581216	FALSE	FALSE
SIDV3-Region_chr1:3584191-3584211	pool1	chr1	3584191	3584211	3.244	0.342	-0.018	0.992732	FALSE	FALSE
SIDV3-Region_chr1:3649543-3649563	pool1	chr1	3649543	3649563	3.68	-0.165	-0.035	0.980548	FALSE	FALSE
SIDV3-Region_chr1:3649650-3649670	pool1	chr1	3649650	3649670	4.227	-0.142	0.155	0.865268	FALSE	FALSE
SIDV3-Region_chr1:3649702-3649722	pool1	chr1	3649702	3649722	3.36	-0.822	-0.748	0.0833845	FALSE	FALSE
SIDV3-Region_chr1:3649799-3649819	pool1	chr1	3649799	3649819	3.86	-0.098	0.103	0.924343	FALSE	FALSE
SIDV3-Region_chr1:3649872-3649892	pool1	chr1	3649872	3649892	3.963	0.224	0.216	0.773632	FALSE	FALSE
SIDV3-Region_chr1:3649986-3650006	pool1	chr1	3649986	3650006	3.838	0.222	0.166	0.874856	FALSE	FALSE
SIDV3-Region_chr1:3650042-3650062	pool1	chr1	3650042	3650062	3.635	-0.279	-0.306	0.659929	FALSE	FALSE
SIDV3-CAGE_chr1:3652426-3652446	pool1	chr1	3652426	3652446	3.176	0.054	0.275	0.783209	FALSE	FALSE
SIDV3-CAGE_chr1:3652529-3652549	pool1	chr1	3652529	3652549	3.67	-0.124	0.099	0.935295	FALSE	FALSE
SIDV3-CAGE_chr1:3652658-3652678	pool1	chr1	3652658	3652678	3.468	-0.036	-0.141	0.903941	FALSE	FALSE
SIDV3-CAGE_chr1:3652714-3652734	pool1	chr1	3652714	3652734	4.493	0.369	0.432	0.239907	FALSE	FALSE
SIDV3-Region_chr1:3668780-3668800	pool1	chr1	3668780	3668800	3.793	0.259	0.176	0.841027	FALSE	FALSE
SIDV3-Region_chr1:3668862-3668882	pool1	chr1	3668862	3668882	4.164	0.107	-0.079	0.94024	FALSE	FALSE
SIDV3-Region_chr1:3669030-3669050	pool1	chr1	3669030	3669050	2.469	-0.344	-0.296	0.809945	FALSE	FALSE
SIDV3-Region_chr1:3669154-3669174	pool1	chr1	3669154	3669174	4.252	0.31	0.056	0.959053	FALSE	FALSE
SIDV3-Region_chr1:3672329-3672349	pool1	chr1	3672329	3672349	4.527	0.102	0.054	0.960612	FALSE	FALSE
SIDV3-Region_chr1:3672431-3672451	pool1	chr1	3672431	3672451	4.349	0.293	0.027	0.981876	FALSE	FALSE
SIDV3-Region_chr1:3672554-3672574	pool1	chr1	3672554	3672574	3.927	0.018	-0.15	0.866042	FALSE	FALSE
SIDV3-Region_chr1:3672690-3672710	pool1	chr1	3672690	3672710	3.733	0.428	0.43	0.467162	FALSE	FALSE
SIDV3-Region_chr1:3672839-3672859	pool1	chr1	3672839	3672859	2.149	-0.596	-0.381	0.759881	FALSE	FALSE
SIDV3-Region_chr1:3672904-3672924	pool1	chr1	3672904	3672924	3.561	0.076	0.118	0.936203	FALSE	FALSE
SIDV3-Region_chr1:3672994-3673014	pool1	chr1	3672994	3673014	4.183	0.619	0.614	0.0706302	FALSE	FALSE
SIDV3-Region_chr1:3673063-3673083	pool1	chr1	3673063	3673083	4.119	-0.884	-0.653	0.034001	TRUE	FALSE
SIDV3-Region_chr1:3673169-3673189	pool1	chr1	3673169	3673189	3.557	-0.573	-0.507	0.348139	FALSE	FALSE
SIDV3-Region_chr1:3673232-3673252	pool1	chr1	3673232	3673252	4.42	0.022	0.074	0.943093	FALSE	FALSE
SIDV3-Region_chr1:3673283-3673303	pool1	chr1	3673283	3673303	3.648	-0.657	-0.517	0.2719	FALSE	FALSE
SIDV3-Region_chr1:3673425-3673445	pool1	chr1	3673425	3673445	4.754	0.076	-0.068	0.943226	FALSE	FALSE
SIDV3-Region_chr1:3673484-3673504	pool1	chr1	3673484	3673504	4.115	-0.325	0.128	0.903526	FALSE	FALSE
SIDV3-Region_chr1:3677133-3677153	pool1	chr1	3677133	3677153	4.003	0.168	0.212	0.777707	FALSE	FALSE
SIDV3-Region_chr1:3677191-3677211	pool1	chr1	3677191	3677211	3.734	-0.248	-0.077	0.95276	FALSE	FALSE
SIDV3-Region_chr1:3677303-3677323	pool1	chr1	3677303	3677323	4.271	-0.268	-0.133	0.874921	FALSE	FALSE
SIDV3-Region_chr1:3677403-3677423	pool1	chr1	3677403	3677423	3.597	0.067	0.15	0.886473	FALSE	FALSE
SIDV3-Region_chr1:3678292-3678312	pool1	chr1	3678292	3678312	4.166	0.322	0.267	0.679981	FALSE	FALSE
SIDV3-Region_chr1:3678348-3678368	pool1	chr1	3678348	3678368	2.756	-0.721	-0.368	0.706341	FALSE	FALSE
SIDV3-Region_chr1:3678414-3678434	pool1	chr1	3678414	3678434	3.697	-0.042	0.069	0.957618	FALSE	FALSE
SIDV3-Region_chr1:3678475-3678495	pool1	chr1	3678475	3678495	4.035	-0.115	-0.178	0.849291	FALSE	FALSE
SIDV3-Region_chr1:3678581-3678601	pool1	chr1	3678581	3678601	4.256	0.262	0.233	0.717288	FALSE	FALSE
SIDV3-Region_chr1:3688352-3688372	pool1	chr1	3688352	3688372	4.021	-0.104	-0.117	0.907475	FALSE	FALSE
SIDV3-Region_chr1:3688433-3688453	pool1	chr1	3688433	3688453	3.915	0.193	-0.031	0.981042	FALSE	FALSE
SIDV3-Region_chr1:3688502-3688522	pool1	chr1	3688502	3688522	3.396	0.15	0.129	0.916952	FALSE	FALSE
SIDV3-Region_chr1:3688592-3688612	pool1	chr1	3688592	3688612	3.518	-0.61	-0.463	0.442566	FALSE	FALSE
SIDV3-Region_chr1:3688663-3688683	pool1	chr1	3688663	3688683	4.178	0.29	0.134	0.874921	FALSE	FALSE
SIDV3-Region_chr1:3688769-3688789	pool1	chr1	3688769	3688789	4.312	0.305	0.159	0.832514	FALSE	FALSE
SIDV3-Region_chr1:3689802-3689822	pool1	chr1	3689802	3689822	4.05	0.216	0.116	0.90692	FALSE	FALSE
SIDV3-Region_chr1:3689875-3689895	pool1	chr1	3689875	3689895	4.457	0.236	0.051	0.961128	FALSE	FALSE
SIDV3-Region_chr1:3689937-3689957	pool1	chr1	3689937	3689957	3.674	-0.689	-0.578	0.220308	FALSE	FALSE
SIDV3-Region_chr1:3690027-3690047	pool1	chr1	3690027	3690047	4.608	0.2	0.221	0.731584	FALSE	FALSE
SIDV3-Region_chr1:3690117-3690137	pool1	chr1	3690117	3690137	3.524	-0.014	0.149	0.89097	FALSE	FALSE
SIDV3-Region_chr1:3690211-3690231	pool1	chr1	3690211	3690231	4.314	0.144	0.038	0.975032	FALSE	FALSE
SIDV3-Region_chr1:3695659-3695679	pool1	chr1	3695659	3695679	5.185	0.396	0.24	0.624174	FALSE	FALSE
SIDV3-Region_chr1:3695777-3695797	pool1	chr1	3695777	3695797	3.719	-0.032	-0.04	0.979132	FALSE	FALSE
SIDV3-Region_chr1:3695862-3695882	pool1	chr1	3695862	3695882	4.443	0.347	0.042	0.971334	FALSE	FALSE
SIDV3-Region_chr1:3695982-3696002	pool1	chr1	3695982	3696002	2.475	0.396	0.414	0.680951	FALSE	FALSE
SIDV3-Region_chr1:3698621-3698641	pool1	chr1	3698621	3698641	3.735	-0.098	0.024	0.987401	FALSE	FALSE
SIDV3-Region_chr1:3698683-3698703	pool1	chr1	3698683	3698703	3.782	-0.207	-0.378	0.566297	FALSE	FALSE
SIDV3-Region_chr1:3698784-3698804	pool1	chr1	3698784	3698804	4.404	0.147	0.012	0.992583	FALSE	FALSE
SIDV3-Region_chr1:3698944-3698964	pool1	chr1	3698944	3698964	4.213	-0.131	0.078	0.945905	FALSE	FALSE
SIDV3-Region_chr1:3699111-3699131	pool1	chr1	3699111	3699131	4.252	0.065	0.008	0.995043	FALSE	FALSE
SIDV3-Region_chr1:3699203-3699223	pool1	chr1	3699203	3699223	4.24	0.033	0.223	0.77753	FALSE	FALSE
SIDV3-Region_chr1:3699277-3699297	pool1	chr1	3699277	3699297	3.918	-0.092	-0.021	0.987864	FALSE	FALSE
SIDV3-Region_chr1:3702945-3702965	pool1	chr1	3702945	3702965	4.188	-0.292	-0.063	0.959027	FALSE	FALSE
SIDV3-Region_chr1:3703211-3703231	pool1	chr1	3703211	3703231	4.266	-0.104	0.109	0.944385	FALSE	FALSE
SIDV3-Region_chr1:3703317-3703337	pool1	chr1	3703317	3703337	4.591	0.317	0.05	0.965863	FALSE	FALSE
SIDV3-Region_chr1:3707979-3707999	pool1	chr1	3707979	3707999	3.839	0.053	-0.132	0.906613	FALSE	FALSE
SIDV3-Region_chr1:3708048-3708068	pool1	chr1	3708048	3708068	4.41	0.161	0.142	0.860688	FALSE	FALSE
SIDV3-Region_chr1:3708204-3708224	pool1	chr1	3708204	3708224	4.613	0.13	-0.171	0.814364	FALSE	FALSE
SIDV3-Region_chr1:3708277-3708297	pool1	chr1	3708277	3708297	4.133	-0.02	-0.123	0.889532	FALSE	FALSE
SIDV3-Region_chr1:3708355-3708375	pool1	chr1	3708355	3708375	4.491	0.286	0.188	0.784144	FALSE	FALSE
SIDV3-Region_chr1:3708989-3709009	pool1	chr1	3708989	3709009	2.803	0.193	0.351	0.717287	FALSE	FALSE
SIDV3-Region_chr1:3709147-3709167	pool1	chr1	3709147	3709167	3.434	0.15	0.415	0.559966	FALSE	FALSE
SIDV3-Region_chr1:3709238-3709258	pool1	chr1	3709238	3709258	4.604	0.612	0.652	0.0122143	FALSE	TRUE
SIDV3-Region_chr1:3709292-3709312	pool1	chr1	3709292	3709312	3.943	0.006	0.169	0.839956	FALSE	FALSE
SIDV3-Region_chr1:3709390-3709410	pool1	chr1	3709390	3709410	4.483	0.142	0.306	0.568034	FALSE	FALSE
SIDV3-Region_chr1:3714354-3714374	pool1	chr1	3714354	3714374	3.309	0.101	0.135	0.91017	FALSE	FALSE
SIDV3-Region_chr1:3714486-3714506	pool1	chr1	3714486	3714506	3.055	0.537	0.738	0.40642	FALSE	FALSE
SIDV3-Region_chr1:3714551-3714571	pool1	chr1	3714551	3714571	4.256	-0.1	-0.02	0.989016	FALSE	FALSE
SIDV3-Region_chr1:3714685-3714705	pool1	chr1	3714685	3714705	4.24	-0.145	-0.116	0.897474	FALSE	FALSE
SIDV3-Region_chr1:3714761-3714781	pool1	chr1	3714761	3714781	4.111	0.138	0.047	0.971153	FALSE	FALSE
SIDV3-Region_chr1:3717412-3717432	pool1	chr1	3717412	3717432	4.29	0.172	0.128	0.876625	FALSE	FALSE
SIDV3-Region_chr1:3717501-3717521	pool1	chr1	3717501	3717521	2.7	-0.017	0.115	0.941961	FALSE	FALSE
SIDV3-Region_chr1:3717619-3717639	pool1	chr1	3717619	3717639	3.768	-0.055	-0.119	0.9089	FALSE	FALSE
SIDV3-Region_chr1:3717726-3717746	pool1	chr1	3717726	3717746	3.91	0.821	0.731	0.0887717	FALSE	FALSE
SIDV3-Region_chr1:3717815-3717835	pool1	chr1	3717815	3717835	4.123	0.182	0.129	0.886003	FALSE	FALSE
SIDV3-Region_chr1:3718689-3718709	pool1	chr1	3718689	3718709	4.286	0.217	-0.056	0.959053	FALSE	FALSE
SIDV3-Region_chr1:3718754-3718774	pool1	chr1	3718754	3718774	1.977	-1.006	-0.949	0.240105	FALSE	FALSE
SIDV3-Region_chr1:3718876-3718896	pool1	chr1	3718876	3718896	3.856	0.246	0.199	0.816211	FALSE	FALSE
SIDV3-Region_chr1:3718991-3719011	pool1	chr1	3718991	3719011	3.633	0.025	0.028	0.984331	FALSE	FALSE
SIDV3-Region_chr1:3719102-3719122	pool1	chr1	3719102	3719122	4.067	-0.019	-0.286	0.643783	FALSE	FALSE
SIDV3-Region_chr1:3727163-3727183	pool1	chr1	3727163	3727183	3.612	-0.266	-0.074	0.961625	FALSE	FALSE
SIDV3-Region_chr1:3727222-3727242	pool1	chr1	3727222	3727242	4.021	0.021	-0.07	0.952469	FALSE	FALSE
SIDV3-Region_chr1:3727306-3727326	pool1	chr1	3727306	3727326	4.167	0.549	0.375	0.462071	FALSE	FALSE
SIDV3-Region_chr1:3727465-3727485	pool1	chr1	3727465	3727485	4.529	0.259	0.353	0.434105	FALSE	FALSE
SIDV3-Region_chr1:3727607-3727627	pool1	chr1	3727607	3727627	4.046	-0.122	0.156	0.860061	FALSE	FALSE
SIDV3-Region_chr1:3732541-3732561	pool1	chr1	3732541	3732561	4.246	0.101	0.038	0.975032	FALSE	FALSE
SIDV3-Region_chr1:3732681-3732701	pool1	chr1	3732681	3732701	4.024	0.083	-0.045	0.971117	FALSE	FALSE
SIDV3-Region_chr1:3732774-3732794	pool1	chr1	3732774	3732794	4.284	0.208	0.19	0.799313	FALSE	FALSE
SIDV3-Region_chr1:3741684-3741704	pool1	chr1	3741684	3741704	4.402	0.373	0.229	0.70015	FALSE	FALSE
SIDV3-Region_chr1:3741871-3741891	pool1	chr1	3741871	3741891	3.422	-0.023	-0.2	0.837562	FALSE	FALSE
SIDV3-Region_chr1:3741974-3741994	pool1	chr1	3741974	3741994	4.629	0.147	0.14	0.85808	FALSE	FALSE
SIDV3-Region_chr1:3742121-3742141	pool1	chr1	3742121	3742141	3.291	-0.412	0.038	0.982347	FALSE	FALSE
SIDV3-Region_chr1:3756430-3756450	pool1	chr1	3756430	3756450	3.987	0.123	-0.009	0.995043	FALSE	FALSE
SIDV3-Region_chr1:3756507-3756527	pool1	chr1	3756507	3756527	4.704	0.209	0.259	0.603291	FALSE	FALSE
SIDV3-Region_chr1:3756614-3756634	pool1	chr1	3756614	3756634	2.832	-0.121	0.261	0.822451	FALSE	FALSE
SIDV3-Region_chr1:3756717-3756737	pool1	chr1	3756717	3756737	3.422	-0.754	-0.409	0.541413	FALSE	FALSE
SIDV3-Region_chr1:3762212-3762232	pool1	chr1	3762212	3762232	4.219	0.269	0.116	0.911693	FALSE	FALSE
SIDV3-Region_chr1:3762315-3762335	pool1	chr1	3762315	3762335	3.516	-0.192	-0.316	0.716957	FALSE	FALSE
SIDV3-Region_chr1:3762423-3762443	pool1	chr1	3762423	3762443	4.484	0.225	0.059	0.955171	FALSE	FALSE
SIDV3-Region_chr1:3762513-3762533	pool1	chr1	3762513	3762533	3.919	0.244	0.039	0.975733	FALSE	FALSE
SIDV3-Region_chr1:3762605-3762625	pool1	chr1	3762605	3762625	4.215	0.195	0.124	0.891045	FALSE	FALSE
SIDV3-Region_chr1:3762669-3762689	pool1	chr1	3762669	3762689	3.266	-0.173	-0.226	0.837083	FALSE	FALSE
SIDV3-Region_chr1:3814907-3814927	pool1	chr1	3814907	3814927	4.152	-0.123	-0.219	0.771784	FALSE	FALSE
SIDV3-Region_chr1:3815058-3815078	pool1	chr1	3815058	3815078	4.798	0.227	0.028	0.980972	FALSE	FALSE
SIDV3-Region_chr1:3815161-3815181	pool1	chr1	3815161	3815181	3.032	0.155	0.476	0.551099	FALSE	FALSE
SIDV3-Region_chr1:3815247-3815267	pool1	chr1	3815247	3815267	4.204	-0.399	-0.275	0.661636	FALSE	FALSE
SIDV3-Region_chr1:3827743-3827763	pool1	chr1	3827743	3827763	3.971	-0.074	-0.126	0.902182	FALSE	FALSE
SIDV3-Region_chr1:3827823-3827843	pool1	chr1	3827823	3827843	3.319	0.022	0.276	0.758201	FALSE	FALSE
SIDV3-Region_chr1:3827995-3828015	pool1	chr1	3827995	3828015	4.243	-0.07	-0.002	0.998571	FALSE	FALSE
SIDV3-CAGE_chr1:3856917-3856937	pool1	chr1	3856917	3856937	4.031	0.119	0.121	0.91517	FALSE	FALSE
SIDV3-CAGE_chr1:3856979-3856999	pool1	chr1	3856979	3856999	4.184	0.317	0.281	0.705957	FALSE	FALSE
SIDV3-CAGE_chr1:3857053-3857073	pool1	chr1	3857053	3857073	3.552	0.06	0.053	0.970766	FALSE	FALSE
SIDV3-CAGE_chr1:3857157-3857177	pool1	chr1	3857157	3857177	3.931	0.256	0.272	0.705923	FALSE	FALSE
SIDV3-CAGE_chr1:3857217-3857237	pool1	chr1	3857217	3857237	4.07	-0.111	-0.274	0.681515	FALSE	FALSE
SIDV3-Region_chr1:3857376-3857396	pool1	chr1	3857376	3857396	3.672	-0.158	-0.243	0.767807	FALSE	FALSE
SIDV3-Region_chr1:3857507-3857527	pool1	chr1	3857507	3857527	4.333	-0.189	-0.139	0.880499	FALSE	FALSE
SIDV3-Region_chr1:3857563-3857583	pool1	chr1	3857563	3857583	4.368	-0.006	-0.143	0.862748	FALSE	FALSE
SIDV3-Region_chr1:3857644-3857664	pool1	chr1	3857644	3857664	4.102	-0.26	-0.069	0.955285	FALSE	FALSE
SIDV3-Region_chr1:3857716-3857736	pool1	chr1	3857716	3857736	3.551	0.127	0.106	0.944197	FALSE	FALSE
SIDV3-Region_chr1:3858106-3858126	pool1	chr1	3858106	3858126	4.589	-0.395	-0.126	0.870325	FALSE	FALSE
SIDV3-Region_chr1:3858172-3858192	pool1	chr1	3858172	3858192	4.324	0.168	0.233	0.74093	FALSE	FALSE
SIDV3-Region_chr1:3858288-3858308	pool1	chr1	3858288	3858308	3.604	-0.141	0.327	0.628336	FALSE	FALSE
SIDV3-Region_chr1:3858398-3858418	pool1	chr1	3858398	3858418	3.676	-0.366	-0.187	0.836654	FALSE	FALSE
SIDV3-Region_chr1:3858785-3858805	pool1	chr1	3858785	3858805	3.732	-0.126	-0.103	0.937269	FALSE	FALSE
SIDV3-Region_chr1:3858871-3858891	pool1	chr1	3858871	3858891	3.723	0.246	0.263	0.770988	FALSE	FALSE
SIDV3-Region_chr1:3859022-3859042	pool1	chr1	3859022	3859042	3.489	-0.086	-0.136	0.903979	FALSE	FALSE
SIDV3-Region_chr1:3859150-3859170	pool1	chr1	3859150	3859170	3.48	0.376	0.249	0.836701	FALSE	FALSE
SIDV3-Region_chr1:3869824-3869844	pool1	chr1	3869824	3869844	4.348	0.226	0.442	0.37554	FALSE	FALSE
SIDV3-Region_chr1:3869904-3869924	pool1	chr1	3869904	3869924	4.67	0.201	0.169	0.807203	FALSE	FALSE
SIDV3-Region_chr1:3870006-3870026	pool1	chr1	3870006	3870026	4.131	-0.062	-0.247	0.697721	FALSE	FALSE
SIDV3-Region_chr1:3870057-3870077	pool1	chr1	3870057	3870077	3.97	-0.036	-0.117	0.91017	FALSE	FALSE
SIDV3-Region_chr1:3870171-3870191	pool1	chr1	3870171	3870191	4.421	0.134	0.295	0.63009	FALSE	FALSE
SIDV3-Region_chr1:3870255-3870275	pool1	chr1	3870255	3870275	3.848	0.048	0.235	0.76851	FALSE	FALSE
SIDV3-Region_chr1:4563660-4563680	pool1	chr1	4563660	4563680	3.368	0.137	-0.058	0.971239	FALSE	FALSE
SIDV3-Region_chr1:4563847-4563867	pool1	chr1	4563847	4563867	4.478	-0.011	-0.06	0.953904	FALSE	FALSE
SIDV3-Region_chr1:4563906-4563926	pool1	chr1	4563906	4563926	4.556	0.484	0.732	0.00359968	FALSE	TRUE
SIDV3-Region_chr1:4564067-4564087	pool1	chr1	4564067	4564087	2.461	-0.093	-0.022	0.992294	FALSE	FALSE
SIDV3-Region_chr1:4585218-4585238	pool1	chr1	4585218	4585238	3.639	-0.431	-0.402	0.533227	FALSE	FALSE
SIDV3-Region_chr1:4585312-4585332	pool1	chr1	4585312	4585332	2.838	-0.185	-0.057	0.977446	FALSE	FALSE
SIDV3-Region_chr1:4585390-4585410	pool1	chr1	4585390	4585410	3.927	-0.159	-0.273	0.684087	FALSE	FALSE
SIDV3-Region_chr1:4585455-4585475	pool1	chr1	4585455	4585475	4.15	0.18	0.083	0.932929	FALSE	FALSE
SIDV3-Region_chr1:4585566-4585586	pool1	chr1	4585566	4585586	3.696	-0.193	-0.105	0.925768	FALSE	FALSE
SIDV3-Region_chr1:4594511-4594531	pool1	chr1	4594511	4594531	3.538	-0.712	-0.207	0.865079	FALSE	FALSE
SIDV3-Region_chr1:4594627-4594647	pool1	chr1	4594627	4594647	4.472	0.14	0.088	0.928657	FALSE	FALSE
SIDV3-Region_chr1:4594727-4594747	pool1	chr1	4594727	4594747	4.575	0.416	0.157	0.829171	FALSE	FALSE
SIDV3-Region_chr1:4627341-4627361	pool1	chr1	4627341	4627361	3.991	-0.519	-0.317	0.627134	FALSE	FALSE
SIDV3-Region_chr1:4627512-4627532	pool1	chr1	4627512	4627532	3.675	0.054	-0.065	0.960517	FALSE	FALSE
SIDV3-Region_chr1:4627581-4627601	pool1	chr1	4627581	4627601	3.943	0.06	0.234	0.749336	FALSE	FALSE
SIDV3-Region_chr1:4627633-4627653	pool1	chr1	4627633	4627653	3.979	0.135	0.126	0.913924	FALSE	FALSE
SIDV3-Region_chr1:4627700-4627720	pool1	chr1	4627700	4627720	4.34	0.098	-0.002	0.998984	FALSE	FALSE
SIDV3-Region_chr1:5980094-5980114	pool1	chr1	5980094	5980114	4.348	0.268	0.429	0.265125	FALSE	FALSE
SIDV3-Region_chr1:5980228-5980248	pool1	chr1	5980228	5980248	3.658	-0.221	-0.214	0.827178	FALSE	FALSE
SIDV3-Region_chr1:5980285-5980305	pool1	chr1	5980285	5980305	4.135	0.016	0.218	0.757537	FALSE	FALSE
SIDV3-Region_chr1:5980355-5980375	pool1	chr1	5980355	5980375	5.229	0.212	0.128	0.856247	FALSE	FALSE
SIDV3-Region_chr1:5980460-5980480	pool1	chr1	5980460	5980480	3.94	-0.153	-0.131	0.888828	FALSE	FALSE
SIDV3-Region_chr1:5980537-5980557	pool1	chr1	5980537	5980557	5.338	0.784	0.383	0.263751	FALSE	FALSE
SIDV3-Region_chr1:5980691-5980711	pool1	chr1	5980691	5980711	4.087	0.064	0.24	0.718761	FALSE	FALSE
SIDV3-Region_chr1:5992141-5992161	pool1	chr1	5992141	5992161	4.131	0.11	0.117	0.91033	FALSE	FALSE
SIDV3-CAGE_chr1:5992167-5992187	pool1	chr1	5992167	5992187	4.316	-0.201	-0.138	0.880991	FALSE	FALSE
SIDV3-Region_chr1:5992197-5992217	pool1	chr1	5992197	5992217	3.583	-0.007	0.107	0.927596	FALSE	FALSE
SIDV3-Region_chr1:5992260-5992280	pool1	chr1	5992260	5992280	3.976	0.017	-0.142	0.874794	FALSE	FALSE
SIDV3-Region_chr1:5992337-5992357	pool1	chr1	5992337	5992357	4.309	0.105	0.204	0.771234	FALSE	FALSE
SIDV3-Region_chr1:5992391-5992411	pool1	chr1	5992391	5992411	3.736	-0.396	-0.331	0.643002	FALSE	FALSE
SIDV3-Region_chr1:5992462-5992482	pool1	chr1	5992462	5992482	3.864	-0.898	-0.622	0.0901078	FALSE	FALSE
SIDV3-Region_chr1:5992528-5992548	pool1	chr1	5992528	5992548	4.201	-0.118	-0.244	0.714336	FALSE	FALSE
SIDV3-CAGE_chr1:5992645-5992665	pool1	chr1	5992645	5992665	3.534	-0.099	0.012	0.993916	FALSE	FALSE
SIDV3-CAGE_chr1:5992784-5992804	pool1	chr1	5992784	5992804	4.621	0.471	0.538	0.10585	FALSE	FALSE
SIDV3-CAGE_chr1:5992843-5992863	pool1	chr1	5992843	5992863	3.189	-0.221	-0.272	0.788794	FALSE	FALSE
SIDV3-Region_chr1:5994563-5994583	pool1	chr1	5994563	5994583	3.787	0.054	0.24	0.750746	FALSE	FALSE
SIDV3-Region_chr1:5994718-5994738	pool1	chr1	5994718	5994738	4.564	-0.003	-0.001	0.999722	FALSE	FALSE
SIDV3-Region_chr1:5994830-5994850	pool1	chr1	5994830	5994850	3.261	-0.602	-0.52	0.471598	FALSE	FALSE
SIDV3-Region_chr1:5994925-5994945	pool1	chr1	5994925	5994945	4.391	0.002	-0.061	0.953157	FALSE	FALSE
SIDV3-Region_chr1:5994986-5995006	pool1	chr1	5994986	5995006	4.591	0.145	0.055	0.95616	FALSE	FALSE
SIDV3-Region_chr1:5995283-5995303	pool1	chr1	5995283	5995303	4.004	0.21	-0.167	0.841027	FALSE	FALSE
SIDV3-Region_chr1:5995387-5995407	pool1	chr1	5995387	5995407	4.015	-0.116	-0.147	0.884084	FALSE	FALSE
SIDV3-Region_chr1:5995491-5995511	pool1	chr1	5995491	5995511	4.41	-0.08	-0.06	0.95616	FALSE	FALSE
SIDV3-Region_chr1:5995595-5995615	pool1	chr1	5995595	5995615	4.393	-0.276	-0.15	0.849868	FALSE	FALSE
SIDV3-Region_chr1:6001404-6001424	pool1	chr1	6001404	6001424	3.649	0.464	0.53	0.286719	FALSE	FALSE
SIDV3-Region_chr1:6001469-6001489	pool1	chr1	6001469	6001489	2.775	-0.115	-0.059	0.977062	FALSE	FALSE
SIDV3-Region_chr1:6001553-6001573	pool1	chr1	6001553	6001573	3.779	0.485	0.334	0.608451	FALSE	FALSE
SIDV3-Region_chr1:6001624-6001644	pool1	chr1	6001624	6001644	3.958	0.035	-0.056	0.964978	FALSE	FALSE
SIDV3-Region_chr1:6003058-6003078	pool1	chr1	6003058	6003078	4.095	0.161	-0.129	0.886218	FALSE	FALSE
SIDV3-Region_chr1:6003231-6003251	pool1	chr1	6003231	6003251	4.032	0.412	0.428	0.394256	FALSE	FALSE
SIDV3-Region_chr1:6003388-6003408	pool1	chr1	6003388	6003408	4.57	0.408	0.469	0.191795	FALSE	FALSE
SIDV3-Region_chr1:6005515-6005535	pool1	chr1	6005515	6005535	4.185	-0.051	0.103	0.917416	FALSE	FALSE
SIDV3-Region_chr1:6005602-6005622	pool1	chr1	6005602	6005622	3.306	0.009	0.074	0.970027	FALSE	FALSE
SIDV3-Region_chr1:6005702-6005722	pool1	chr1	6005702	6005722	4.453	-0.166	-0.033	0.976456	FALSE	FALSE
SIDV3-Region_chr1:6005794-6005814	pool1	chr1	6005794	6005814	4.341	0.322	0.362	0.46322	FALSE	FALSE
SIDV3-Region_chr1:6026071-6026091	pool1	chr1	6026071	6026091	3.62	-0.349	-0.187	0.841027	FALSE	FALSE
SIDV3-Region_chr1:6026156-6026176	pool1	chr1	6026156	6026176	4.115	-0.157	-0.016	0.990796	FALSE	FALSE
SIDV3-Region_chr1:6026257-6026277	pool1	chr1	6026257	6026277	4.028	-0.308	-0.288	0.642498	FALSE	FALSE
SIDV3-Region_chr1:6028551-6028571	pool1	chr1	6028551	6028571	3.411	-0.409	-0.116	0.928657	FALSE	FALSE
SIDV3-Region_chr1:6028661-6028681	pool1	chr1	6028661	6028681	4.092	0.316	-0.142	0.87182	FALSE	FALSE
SIDV3-Region_chr1:6028713-6028733	pool1	chr1	6028713	6028733	4.043	-0.244	-0.166	0.840303	FALSE	FALSE
SIDV3-Region_chr1:6028782-6028802	pool1	chr1	6028782	6028802	3.015	-0.15	-0.147	0.916952	FALSE	FALSE
SIDV3-Region_chr1:6028871-6028891	pool1	chr1	6028871	6028891	3.37	0.194	0.32	0.688548	FALSE	FALSE
SIDV3-Region_chr1:6028965-6028985	pool1	chr1	6028965	6028985	4.344	0.404	0.218	0.785894	FALSE	FALSE
SIDV3-Region_chr1:6035664-6035684	pool1	chr1	6035664	6035684	2.96	-0.035	0.049	0.978173	FALSE	FALSE
SIDV3-Region_chr1:6035769-6035789	pool1	chr1	6035769	6035789	3.807	0.247	0.119	0.911921	FALSE	FALSE
SIDV3-Region_chr1:6035875-6035895	pool1	chr1	6035875	6035895	4.052	-0.462	-0.331	0.561671	FALSE	FALSE
SIDV3-Region_chr1:6035984-6036004	pool1	chr1	6035984	6036004	4.692	0.13	0.08	0.929792	FALSE	FALSE
SIDV3-Region_chr1:6036046-6036066	pool1	chr1	6036046	6036066	4.164	0.086	-0.166	0.843565	FALSE	FALSE
SIDV3-Region_chr1:6041422-6041442	pool1	chr1	6041422	6041442	3.633	-0.174	-0.318	0.662577	FALSE	FALSE
SIDV3-Region_chr1:6041526-6041546	pool1	chr1	6041526	6041546	4.157	0.039	-0.02	0.987739	FALSE	FALSE
SIDV3-Region_chr1:6041682-6041702	pool1	chr1	6041682	6041702	4.222	-0.19	-0.162	0.836148	FALSE	FALSE
SIDV3-Region_chr1:6041817-6041837	pool1	chr1	6041817	6041837	4.259	0.141	-0.086	0.931808	FALSE	FALSE
SIDV3-Region_chr1:6048023-6048043	pool1	chr1	6048023	6048043	3	-0.656	-0.264	0.798258	FALSE	FALSE
SIDV3-Region_chr1:6048109-6048129	pool1	chr1	6048109	6048129	4.148	0.449	0.239	0.733063	FALSE	FALSE
SIDV3-Region_chr1:6048219-6048239	pool1	chr1	6048219	6048239	3.175	0.007	0.12	0.928657	FALSE	FALSE
SIDV3-Region_chr1:6048353-6048373	pool1	chr1	6048353	6048373	3.495	-0.138	0.033	0.984141	FALSE	FALSE
SIDV3-Region_chr1:6048450-6048470	pool1	chr1	6048450	6048470	4.367	0.205	-0.212	0.738056	FALSE	FALSE
SIDV3-Region_chr1:6052930-6052950	pool1	chr1	6052930	6052950	4.498	0.122	0.212	0.746638	FALSE	FALSE
SIDV3-Region_chr1:6053167-6053187	pool1	chr1	6053167	6053187	4.124	-0.295	-0.325	0.542504	FALSE	FALSE
SIDV3-Region_chr1:6053219-6053239	pool1	chr1	6053219	6053239	4.149	0.139	0.211	0.792671	FALSE	FALSE
SIDV3-Region_chr1:6161560-6161580	pool1	chr1	6161560	6161580	3.79	0.655	0.477	0.349433	FALSE	FALSE
SIDV3-Region_chr1:6161631-6161651	pool1	chr1	6161631	6161651	3.612	0.051	0.1	0.941961	FALSE	FALSE
SIDV3-Region_chr1:6161737-6161757	pool1	chr1	6161737	6161757	3.693	0.132	-0.044	0.974601	FALSE	FALSE
SIDV3-Region_chr1:6161805-6161825	pool1	chr1	6161805	6161825	3.707	-0.212	-0.261	0.739059	FALSE	FALSE
SIDV3-Region_chr1:6161859-6161879	pool1	chr1	6161859	6161879	4.513	-0.13	0.077	0.93221	FALSE	FALSE
SIDV3-Region_chr1:6161924-6161944	pool1	chr1	6161924	6161944	3.78	-0.14	-0.292	0.742623	FALSE	FALSE
SIDV3-Region_chr1:6161982-6162002	pool1	chr1	6161982	6162002	4.007	-0.018	-0.141	0.905958	FALSE	FALSE
SIDV3-CAGE_chr1:6180011-6180031	pool1	chr1	6180011	6180031	4	0.223	0.465	0.475635	FALSE	FALSE
SIDV3-CAGE_chr1:6180065-6180085	pool1	chr1	6180065	6180085	4.161	0.07	0.33	0.531153	FALSE	FALSE
SIDV3-CAGE_chr1:6180122-6180142	pool1	chr1	6180122	6180142	4.086	-0.075	0.039	0.981724	FALSE	FALSE
SIDV3-CAGE_chr1:6180182-6180202	pool1	chr1	6180182	6180202	3.389	0.45	0.315	0.687492	FALSE	FALSE
SIDV3-Region_chr1:6180261-6180281	pool1	chr1	6180261	6180281	4.261	0.232	0.192	0.78751	FALSE	FALSE
SIDV3-Region_chr1:6180381-6180401	pool1	chr1	6180381	6180401	4.524	0.131	-0.151	0.838504	FALSE	FALSE
SIDV3-Region_chr1:6180587-6180607	pool1	chr1	6180587	6180607	4.059	0.079	0.056	0.967427	FALSE	FALSE
SIDV3-Region_chr1:6180692-6180712	pool1	chr1	6180692	6180712	4.643	-0.16	-0.04	0.971239	FALSE	FALSE
SIDV3-Region_chr1:6180840-6180860	pool1	chr1	6180840	6180860	3.705	-0.423	-0.36	0.555611	FALSE	FALSE
SIDV3-Region_chr1:6180946-6180966	pool1	chr1	6180946	6180966	3.915	0.194	-0.013	0.9931	FALSE	FALSE
SIDV3-Region_chr1:6181041-6181061	pool1	chr1	6181041	6181061	4.065	-0.018	0.159	0.846774	FALSE	FALSE
SIDV3-Region_chr1:6181187-6181207	pool1	chr1	6181187	6181207	3.758	0.142	-0.073	0.955176	FALSE	FALSE
SIDV3-Region_chr1:6183447-6183467	pool1	chr1	6183447	6183467	3.871	0.364	0.303	0.70593	FALSE	FALSE
SIDV3-Region_chr1:6183516-6183536	pool1	chr1	6183516	6183536	4.006	0.243	-0.041	0.974439	FALSE	FALSE
SIDV3-Region_chr1:6183668-6183688	pool1	chr1	6183668	6183688	3.868	0.03	0.375	0.549971	FALSE	FALSE
SIDV3-Region_chr1:6183763-6183783	pool1	chr1	6183763	6183783	0.606	-0.493	0.234	0.92	FALSE	FALSE
SIDV3-Region_chr1:6183849-6183869	pool1	chr1	6183849	6183869	4.127	0.26	0.25	0.762844	FALSE	FALSE
SIDV3-Region_chr1:6185743-6185763	pool1	chr1	6185743	6185763	4.174	0.314	0.22	0.763429	FALSE	FALSE
SIDV3-Region_chr1:6185838-6185858	pool1	chr1	6185838	6185858	3.643	0.024	-0.197	0.823773	FALSE	FALSE
SIDV3-Region_chr1:6185921-6185941	pool1	chr1	6185921	6185941	3.894	-0.361	-0.468	0.377532	FALSE	FALSE
SIDV3-CAGE_chr1:6199307-6199327	pool1	chr1	6199307	6199327	4.673	0.256	0.188	0.759747	FALSE	FALSE
SIDV3-CAGE_chr1:6199479-6199499	pool1	chr1	6199479	6199499	4.59	1.058	0.805	0.00019543	FALSE	TRUE
SIDV3-CAGE_chr1:6199626-6199646	pool1	chr1	6199626	6199646	4.288	0.396	0.444	0.317033	FALSE	FALSE
SIDV3-Region_chr1:6205176-6205196	pool1	chr1	6205176	6205196	4.312	0.604	0.339	0.547013	FALSE	FALSE
SIDV3-Region_chr1:6205271-6205291	pool1	chr1	6205271	6205291	4.035	-0.6	-0.365	0.487304	FALSE	FALSE
SIDV3-Region_chr1:6205331-6205351	pool1	chr1	6205331	6205351	3.676	-0.351	-0.075	0.953029	FALSE	FALSE
SIDV3-Region_chr1:6205589-6205609	pool1	chr1	6205589	6205609	4.199	0.563	0.227	0.786468	FALSE	FALSE
SIDV3-CAGE_chr1:6206015-6206035	pool1	chr1	6206015	6206035	3.662	0.338	0.186	0.852083	FALSE	FALSE
SIDV3-CAGE_chr1:6206130-6206150	pool1	chr1	6206130	6206150	4.078	-0.053	-0.156	0.852014	FALSE	FALSE
SIDV3-CAGE_chr1:6206185-6206205	pool1	chr1	6206185	6206205	4.107	-0.183	0.069	0.958716	FALSE	FALSE
SIDV3-CAGE_chr1:6206298-6206318	pool1	chr1	6206298	6206318	3.508	-0.088	-0.226	0.807203	FALSE	FALSE
SIDV3-CAGE_chr1:6206374-6206394	pool1	chr1	6206374	6206394	3.705	-0.032	0.301	0.676849	FALSE	FALSE
SIDV3-Region_chr1:6210634-6210654	pool1	chr1	6210634	6210654	3.984	0.15	0.206	0.820455	FALSE	FALSE
SIDV3-Region_chr1:6210722-6210742	pool1	chr1	6210722	6210742	3.984	-0.038	0.006	0.99622	FALSE	FALSE
SIDV3-Region_chr1:6210828-6210848	pool1	chr1	6210828	6210848	4.708	0.374	0.087	0.91808	FALSE	FALSE
SIDV3-Region_chr1:6210882-6210902	pool1	chr1	6210882	6210902	4.039	0.192	-0.054	0.965926	FALSE	FALSE
SIDV3-Region_chr1:6211012-6211032	pool1	chr1	6211012	6211032	4.371	0.01	-0.038	0.973793	FALSE	FALSE
SIDV3-Region_chr1:6227214-6227234	pool1	chr1	6227214	6227234	4.079	-0.479	-0.469	0.411963	FALSE	FALSE
SIDV3-Region_chr1:6227297-6227317	pool1	chr1	6227297	6227317	2.103	-0.083	-0.44	0.710573	FALSE	FALSE
SIDV3-Region_chr1:6227371-6227391	pool1	chr1	6227371	6227391	2.596	-0.374	-0.053	0.97929	FALSE	FALSE
SIDV3-CAGE_chr1:6235702-6235722	pool1	chr1	6235702	6235722	4.64	-0.085	-0.085	0.940439	FALSE	FALSE
SIDV3-CAGE_chr1:6235798-6235818	pool1	chr1	6235798	6235818	4.122	0.339	0.15	0.858457	FALSE	FALSE
SIDV3-CAGE_chr1:6235861-6235881	pool1	chr1	6235861	6235881	4.59	0.289	0.033	0.975588	FALSE	FALSE
SIDV3-CAGE_chr1:6235946-6235966	pool1	chr1	6235946	6235966	3.794	-0.083	-0.136	0.890049	FALSE	FALSE
SIDV3-CAGE_chr1:6236023-6236043	pool1	chr1	6236023	6236043	3.614	-0.434	-0.262	0.743383	FALSE	FALSE
SIDV3-Region_chr1:6238742-6238762	pool1	chr1	6238742	6238762	4.644	0.501	0.412	0.297325	FALSE	FALSE
SIDV3-Region_chr1:6238825-6238845	pool1	chr1	6238825	6238845	4.344	-0.11	-0.108	0.900884	FALSE	FALSE
SIDV3-Region_chr1:6238930-6238950	pool1	chr1	6238930	6238950	4.379	0.236	0.017	0.990152	FALSE	FALSE
SIDV3-Region_chr1:6245076-6245096	pool1	chr1	6245076	6245096	2.82	-1.39	-1.324	0.000489002	TRUE	FALSE
SIDV3-Region_chr1:6245179-6245199	pool1	chr1	6245179	6245199	4.268	-0.302	-0.277	0.692598	FALSE	FALSE
SIDV3-Region_chr1:6245288-6245308	pool1	chr1	6245288	6245308	3.918	-0.184	-0.391	0.492343	FALSE	FALSE
SIDV3-Region_chr1:6245374-6245394	pool1	chr1	6245374	6245394	3.841	0.329	0.162	0.858379	FALSE	FALSE
SIDV3-Region_chr1:6246679-6246699	pool1	chr1	6246679	6246699	3.811	0.034	0.012	0.993149	FALSE	FALSE
SIDV3-Region_chr1:6246803-6246823	pool1	chr1	6246803	6246823	3.243	0.448	0.389	0.622088	FALSE	FALSE
SIDV3-Region_chr1:6246937-6246957	pool1	chr1	6246937	6246957	4.18	0.159	-0.185	0.831153	FALSE	FALSE
SIDV3-Region_chr1:6246997-6247017	pool1	chr1	6246997	6247017	3.693	-0.078	0.095	0.932929	FALSE	FALSE
SIDV3-Region_chr1:6247086-6247106	pool1	chr1	6247086	6247106	3.124	-0.291	-0.117	0.942179	FALSE	FALSE
SIDV3-Region_chr1:6249233-6249253	pool1	chr1	6249233	6249253	2.897	-0.425	-0.553	0.515315	FALSE	FALSE
SIDV3-Region_chr1:6249303-6249323	pool1	chr1	6249303	6249323	4.251	0.154	0.112	0.898504	FALSE	FALSE
SIDV3-Region_chr1:6249448-6249468	pool1	chr1	6249448	6249468	3.871	0.356	0.361	0.520921	FALSE	FALSE
SIDV3-Region_chr1:6249535-6249555	pool1	chr1	6249535	6249555	3.738	0.234	0.456	0.372165	FALSE	FALSE
SIDV3-Region_chr1:6249628-6249648	pool1	chr1	6249628	6249648	4.321	0.13	0.16	0.826569	FALSE	FALSE
SIDV3-Region_chr1:6252611-6252631	pool1	chr1	6252611	6252631	3.88	0.298	0.042	0.976296	FALSE	FALSE
SIDV3-Region_chr1:6252681-6252701	pool1	chr1	6252681	6252701	2.929	-0.615	-0.569	0.492343	FALSE	FALSE
SIDV3-Region_chr1:6252754-6252774	pool1	chr1	6252754	6252774	3.902	0.106	0.01	0.995043	FALSE	FALSE
SIDV3-Region_chr1:6252910-6252930	pool1	chr1	6252910	6252930	4.19	-0.463	-0.363	0.611039	FALSE	FALSE
SIDV3-Region_chr1:6252995-6253015	pool1	chr1	6252995	6253015	3.095	-0.442	0.003	0.998945	FALSE	FALSE
SIDV3-CAGE_chr1:6260788-6260808	pool1	chr1	6260788	6260808	4.641	0.354	0.137	0.851085	FALSE	FALSE
SIDV3-CAGE_chr1:6260876-6260896	pool1	chr1	6260876	6260896	3.53	0.445	0.256	0.77511	FALSE	FALSE
SIDV3-CAGE_chr1:6260951-6260971	pool1	chr1	6260951	6260971	4.262	0.287	0.247	0.685285	FALSE	FALSE
SIDV3-CAGE_chr1:6261028-6261048	pool1	chr1	6261028	6261048	4.013	-0.074	-0.293	0.645542	FALSE	FALSE
SIDV3-CAGE_chr1:6261113-6261133	pool1	chr1	6261113	6261133	4.188	-0.343	-0.142	0.869143	FALSE	FALSE
SIDV3-Region_chr1:6331702-6331722	pool1	chr1	6331702	6331722	2.893	0.03	0.006	0.997585	FALSE	FALSE
SIDV3-Region_chr1:6331860-6331880	pool1	chr1	6331860	6331880	4.159	-0.452	-0.082	0.936203	FALSE	FALSE
SIDV3-Region_chr1:6331924-6331944	pool1	chr1	6331924	6331944	4.169	0.234	-0.19	0.799967	FALSE	FALSE
SIDV3-CAGE_chr1:6393080-6393100	pool1	chr1	6393080	6393100	4.397	-0.335	-0.117	0.888193	FALSE	FALSE
SIDV3-CAGE_chr1:6393221-6393241	pool1	chr1	6393221	6393241	4.151	-0.072	0.081	0.942729	FALSE	FALSE
SIDV3-CAGE_chr1:6393287-6393307	pool1	chr1	6393287	6393307	3.99	0.374	0.272	0.6769	FALSE	FALSE
SIDV3-CAGE_chr1:6393368-6393388	pool1	chr1	6393368	6393388	3.731	0.071	-0.366	0.674521	FALSE	FALSE
SIDV3-CAGE_chr1:6393433-6393453	pool1	chr1	6393433	6393453	3.596	0.017	0.262	0.759423	FALSE	FALSE
SIDV3-Region_chr1:6423389-6423409	pool1	chr1	6423389	6423409	3.666	-0.065	0.084	0.943842	FALSE	FALSE
SIDV3-Region_chr1:6423461-6423481	pool1	chr1	6423461	6423481	4.203	0.316	0.433	0.318103	FALSE	FALSE
SIDV3-Region_chr1:6423594-6423614	pool1	chr1	6423594	6423614	3.866	-0.347	-0.292	0.70948	FALSE	FALSE
SIDV3-Region_chr1:6423769-6423789	pool1	chr1	6423769	6423789	3.853	0.17	0.014	0.992217	FALSE	FALSE
SIDV3-CAGE_chr1:6424679-6424699	pool1	chr1	6424679	6424699	2.453	-0.128	0.303	0.812314	FALSE	FALSE
SIDV3-CAGE_chr1:6424742-6424762	pool1	chr1	6424742	6424762	3.238	-0.281	-0.191	0.874024	FALSE	FALSE
SIDV3-CAGE_chr1:6424840-6424860	pool1	chr1	6424840	6424860	4.305	-0.008	-0.437	0.316914	FALSE	FALSE
SIDV3-CAGE_chr1:6424896-6424916	pool1	chr1	6424896	6424916	4.791	0.267	0.204	0.739059	FALSE	FALSE
SIDV3-CAGE_chr1:6424989-6425009	pool1	chr1	6424989	6425009	3.957	-0.439	-0.385	0.522318	FALSE	FALSE
SIDV3-CAGE_chr1:6425042-6425062	pool1	chr1	6425042	6425062	4.058	-0.152	0.003	0.998481	FALSE	FALSE
SIDV3-Region_chr1:6438010-6438030	pool1	chr1	6438010	6438030	3.505	0.105	0.124	0.920993	FALSE	FALSE
SIDV3-Region_chr1:6438171-6438191	pool1	chr1	6438171	6438191	3.652	0.394	0.154	0.876719	FALSE	FALSE
SIDV3-Region_chr1:6438228-6438248	pool1	chr1	6438228	6438248	4.76	0.317	0.287	0.549004	FALSE	FALSE
SIDV3-Region_chr1:6441526-6441546	pool1	chr1	6441526	6441546	3.334	-0.032	-0.121	0.932464	FALSE	FALSE
SIDV3-Region_chr1:6441732-6441752	pool1	chr1	6441732	6441752	3.068	-0.456	-0.359	0.712805	FALSE	FALSE
SIDV3-Region_chr1:6441867-6441887	pool1	chr1	6441867	6441887	4.082	-0.127	-0.144	0.870325	FALSE	FALSE
SIDV3-Region_chr1:6441945-6441965	pool1	chr1	6441945	6441965	3.567	0.068	-0.125	0.910583	FALSE	FALSE
SIDV3-Region_chr1:6448091-6448111	pool1	chr1	6448091	6448111	3.839	0.025	0.033	0.980548	FALSE	FALSE
SIDV3-Region_chr1:6448152-6448172	pool1	chr1	6448152	6448172	4.516	0.255	0.171	0.803475	FALSE	FALSE
SIDV3-Region_chr1:6448319-6448339	pool1	chr1	6448319	6448339	4.271	0.002	-0.017	0.989985	FALSE	FALSE
SIDV3-Region_chr1:6448394-6448414	pool1	chr1	6448394	6448414	4.21	-0.089	-0.185	0.804484	FALSE	FALSE
SIDV3-Region_chr1:6448474-6448494	pool1	chr1	6448474	6448494	4.911	0.124	-0.024	0.981979	FALSE	FALSE
SIDV3-Region_chr1:6455031-6455051	pool1	chr1	6455031	6455051	3.681	0.095	-0.095	0.932929	FALSE	FALSE
SIDV3-Region_chr1:6455161-6455181	pool1	chr1	6455161	6455181	3.679	-0.209	0.022	0.988505	FALSE	FALSE
SIDV3-Region_chr1:6455218-6455238	pool1	chr1	6455218	6455238	4.424	-0.132	-0.148	0.869482	FALSE	FALSE
SIDV3-Region_chr1:6455319-6455339	pool1	chr1	6455319	6455339	3.669	-0.345	-0.344	0.592372	FALSE	FALSE
SIDV3-Region_chr1:6456348-6456368	pool1	chr1	6456348	6456368	4.286	0.464	0.288	0.646024	FALSE	FALSE
SIDV3-Region_chr1:6456508-6456528	pool1	chr1	6456508	6456528	4.328	0.247	0.121	0.896867	FALSE	FALSE
SIDV3-Region_chr1:6456661-6456681	pool1	chr1	6456661	6456681	4.757	0.129	-0.146	0.83441	FALSE	FALSE
SIDV3-Region_chr1:6456717-6456737	pool1	chr1	6456717	6456737	4.083	0.015	0.02	0.988551	FALSE	FALSE
SIDV3-Region_chr1:6462404-6462424	pool1	chr1	6462404	6462424	2.6	0.29	0.15	0.92311	FALSE	FALSE
SIDV3-Region_chr1:6462516-6462536	pool1	chr1	6462516	6462536	3.694	-0.239	-0.337	0.60075	FALSE	FALSE
SIDV3-Region_chr1:6462611-6462631	pool1	chr1	6462611	6462631	2.668	-0.549	-0.161	0.920731	FALSE	FALSE
SIDV3-Region_chr1:6462718-6462738	pool1	chr1	6462718	6462738	3.758	0.056	0.165	0.889092	FALSE	FALSE
SIDV3-Region_chr1:6462779-6462799	pool1	chr1	6462779	6462799	3.809	0.405	0.342	0.582247	FALSE	FALSE
SIDV3-Region_chr1:6464463-6464483	pool1	chr1	6464463	6464483	4.259	0.475	0.464	0.219082	FALSE	FALSE
SIDV3-Region_chr1:6464514-6464534	pool1	chr1	6464514	6464534	3.711	0.334	0.238	0.759512	FALSE	FALSE
SIDV3-Region_chr1:6464583-6464603	pool1	chr1	6464583	6464603	4.903	0.442	0.228	0.682037	FALSE	FALSE
SIDV3-Region_chr1:6464670-6464690	pool1	chr1	6464670	6464690	4.021	-0.067	-0.126	0.90124	FALSE	FALSE
SIDV3-Region_chr1:6464761-6464781	pool1	chr1	6464761	6464781	3.019	-0.207	-0.055	0.974555	FALSE	FALSE
SIDV3-Region_chr1:6464867-6464887	pool1	chr1	6464867	6464887	2.937	-0.573	-0.364	0.68355	FALSE	FALSE
SIDV3-Region_chr1:6470985-6471005	pool1	chr1	6470985	6471005	5.008	0.496	-0.035	0.973219	FALSE	FALSE
SIDV3-Region_chr1:6471087-6471107	pool1	chr1	6471087	6471107	4.46	0.16	0.004	0.997585	FALSE	FALSE
SIDV3-Region_chr1:6471155-6471175	pool1	chr1	6471155	6471175	3.535	-0.121	0.07	0.961009	FALSE	FALSE
SIDV3-Region_chr1:6471259-6471279	pool1	chr1	6471259	6471279	4.027	0.247	0.033	0.981042	FALSE	FALSE
SIDV3-CAGE_chr1:6471288-6471308	pool1	chr1	6471288	6471308	3.469	0.009	0.045	0.976296	FALSE	FALSE
SIDV3-Region_chr1:6471332-6471352	pool1	chr1	6471332	6471352	2.7	-0.527	-0.461	0.598923	FALSE	FALSE
SIDV3-Region_chr1:6471406-6471426	pool1	chr1	6471406	6471426	4.255	-0.141	-0.113	0.900742	FALSE	FALSE
SIDV3-CAGE_chr1:6471473-6471493	pool1	chr1	6471473	6471493	3.707	0.202	0.124	0.907303	FALSE	FALSE
SIDV3-CAGE_chr1:6471583-6471603	pool1	chr1	6471583	6471603	4.719	-0.074	-0.181	0.812779	FALSE	FALSE
SIDV3-Region_chr1:6472417-6472437	pool1	chr1	6472417	6472437	4.06	0.052	-0.008	0.995252	FALSE	FALSE
SIDV3-Region_chr1:6472518-6472538	pool1	chr1	6472518	6472538	3.581	0.085	0.209	0.829171	FALSE	FALSE
SIDV3-Region_chr1:6472591-6472611	pool1	chr1	6472591	6472611	4.134	-0.048	-0.066	0.959053	FALSE	FALSE
SIDV3-Region_chr1:6475567-6475587	pool1	chr1	6475567	6475587	4.473	0.55	0.29	0.558847	FALSE	FALSE
SIDV3-Region_chr1:6475662-6475682	pool1	chr1	6475662	6475682	3.455	-0.257	-0.224	0.805495	FALSE	FALSE
SIDV3-Region_chr1:6475776-6475796	pool1	chr1	6475776	6475796	4.121	-0.079	-0.05	0.966858	FALSE	FALSE
SIDV3-Region_chr1:6475866-6475886	pool1	chr1	6475866	6475886	4.147	0.261	0.113	0.90124	FALSE	FALSE
SIDV3-Region_chr1:6480940-6480960	pool1	chr1	6480940	6480960	3.701	-0.31	-0.411	0.501723	FALSE	FALSE
SIDV3-Region_chr1:6481047-6481067	pool1	chr1	6481047	6481067	3.957	0.191	0.273	0.670595	FALSE	FALSE
SIDV3-Region_chr1:6481145-6481165	pool1	chr1	6481145	6481165	5.055	0.483	0.257	0.598369	FALSE	FALSE
SIDV3-Region_chr1:6483040-6483060	pool1	chr1	6483040	6483060	3.971	0.53	0.441	0.351734	FALSE	FALSE
SIDV3-Region_chr1:6483150-6483170	pool1	chr1	6483150	6483170	3.913	0.285	0.402	0.471598	FALSE	FALSE
SIDV3-Region_chr1:6483216-6483236	pool1	chr1	6483216	6483236	3.936	-0.258	-0.118	0.90341	FALSE	FALSE
SIDV3-Region_chr1:6484490-6484510	pool1	chr1	6484490	6484510	3.124	0.143	0.015	0.993141	FALSE	FALSE
SIDV3-Region_chr1:6484559-6484579	pool1	chr1	6484559	6484579	3.583	-0.648	-0.449	0.591423	FALSE	FALSE
SIDV3-Region_chr1:6484650-6484670	pool1	chr1	6484650	6484670	3.724	-0.291	-0.259	0.725224	FALSE	FALSE
SIDV3-Region_chr1:6484769-6484789	pool1	chr1	6484769	6484789	4.566	-0.021	-0.056	0.957618	FALSE	FALSE
SIDV3-Region_chr1:6484829-6484849	pool1	chr1	6484829	6484849	3.856	0.731	0.445	0.355227	FALSE	FALSE
SIDV3-Region_chr1:6486427-6486447	pool1	chr1	6486427	6486447	2.654	0.084	-0.077	0.969185	FALSE	FALSE
SIDV3-Region_chr1:6486638-6486658	pool1	chr1	6486638	6486658	4.191	0.279	0.297	0.592191	FALSE	FALSE
SIDV3-Region_chr1:6486763-6486783	pool1	chr1	6486763	6486783	4.451	-0.028	-0.019	0.987363	FALSE	FALSE
SIDV3-Region_chr1:6486864-6486884	pool1	chr1	6486864	6486884	3.914	0.012	-0.223	0.763666	FALSE	FALSE
SIDV3-Region_chr1:6489809-6489829	pool1	chr1	6489809	6489829	4.568	-0.199	-0.207	0.748208	FALSE	FALSE
SIDV3-Region_chr1:6489864-6489884	pool1	chr1	6489864	6489884	3.987	0.173	0.199	0.810519	FALSE	FALSE
SIDV3-Region_chr1:6489951-6489971	pool1	chr1	6489951	6489971	3.973	-0.284	-0.175	0.837377	FALSE	FALSE
SIDV3-Region_chr1:6490046-6490066	pool1	chr1	6490046	6490066	4.048	0.299	0.213	0.789608	FALSE	FALSE
SIDV3-Region_chr1:6490162-6490182	pool1	chr1	6490162	6490182	3.376	-0.162	0.075	0.958716	FALSE	FALSE
SIDV3-Region_chr1:6490235-6490255	pool1	chr1	6490235	6490255	3.884	0.215	0.102	0.927066	FALSE	FALSE
SIDV3-CAGE_chr1:6579924-6579944	pool1	chr1	6579924	6579944	2.867	-0.01	-0.008	0.996655	FALSE	FALSE
SIDV3-CAGE_chr1:6580025-6580045	pool1	chr1	6580025	6580045	4.114	-0.174	-0.175	0.829595	FALSE	FALSE
SIDV3-CAGE_chr1:6580178-6580198	pool1	chr1	6580178	6580198	3.973	-0.25	-0.372	0.536321	FALSE	FALSE
SIDV3-CAGE_chr1:6580254-6580274	pool1	chr1	6580254	6580274	3.943	0.045	-0.031	0.981056	FALSE	FALSE
SIDV3-Region_chr1:6588179-6588199	pool1	chr1	6588179	6588199	3.556	-0.335	-0.264	0.775988	FALSE	FALSE
SIDV3-Region_chr1:6588340-6588360	pool1	chr1	6588340	6588360	3.86	-0.377	-0.182	0.841106	FALSE	FALSE
SIDV3-Region_chr1:6588408-6588428	pool1	chr1	6588408	6588428	4.01	0.267	0.008	0.995252	FALSE	FALSE
SIDV3-Region_chr1:6588543-6588563	pool1	chr1	6588543	6588563	2.954	0.053	0.069	0.971288	FALSE	FALSE
SIDV3-CAGE_chr1:6625186-6625206	pool1	chr1	6625186	6625206	4.649	0.241	0.054	0.959126	FALSE	FALSE
SIDV3-CAGE_chr1:6625277-6625297	pool1	chr1	6625277	6625297	4.638	0.572	0.208	0.723996	FALSE	FALSE
SIDV3-CAGE_chr1:6625370-6625390	pool1	chr1	6625370	6625390	3.881	0.259	0.161	0.878606	FALSE	FALSE
SIDV3-CAGE_chr1:6625448-6625468	pool1	chr1	6625448	6625468	3.175	-0.017	0.14	0.92311	FALSE	FALSE
SIDV3-Region_chr1:6627071-6627091	pool1	chr1	6627071	6627091	3.897	0.199	0.166	0.853267	FALSE	FALSE
SIDV3-Region_chr1:6627150-6627170	pool1	chr1	6627150	6627170	3.501	0.324	0.375	0.589085	FALSE	FALSE
SIDV3-Region_chr1:6627314-6627334	pool1	chr1	6627314	6627334	4.323	0.015	-0.124	0.882203	FALSE	FALSE
SIDV3-CAGE_chr1:6785399-6785419	pool1	chr1	6785399	6785419	4.597	0.151	0.053	0.959126	FALSE	FALSE
SIDV3-CAGE_chr1:6785504-6785524	pool1	chr1	6785504	6785524	3.668	0.154	0.245	0.754869	FALSE	FALSE
SIDV3-CAGE_chr1:6785616-6785636	pool1	chr1	6785616	6785636	3.128	-0.243	0.156	0.902555	FALSE	FALSE
SIDV3-CAGE_chr1:6785737-6785757	pool1	chr1	6785737	6785757	3.976	-0.014	-0.207	0.782803	FALSE	FALSE
SIDV3-Region_chr1:7198631-7198651	pool1	chr1	7198631	7198651	1.897	0.064	0.658	0.492343	FALSE	FALSE
SIDV3-Region_chr1:7198790-7198810	pool1	chr1	7198790	7198810	4.001	0.177	0.261	0.69113	FALSE	FALSE
SIDV3-Region_chr1:7198870-7198890	pool1	chr1	7198870	7198890	4.683	0.277	0.134	0.864554	FALSE	FALSE
SIDV3-Region_chr1:7198968-7198988	pool1	chr1	7198968	7198988	3.133	0.026	0.242	0.811989	FALSE	FALSE
SIDV3-Region_chr1:7199059-7199079	pool1	chr1	7199059	7199079	3.363	-0.253	-0.141	0.906027	FALSE	FALSE
SIDV3-Region_chr1:7207616-7207636	pool1	chr1	7207616	7207636	4.421	0.142	-0.14	0.866408	FALSE	FALSE
SIDV3-Region_chr1:7207685-7207705	pool1	chr1	7207685	7207705	2.796	-0.054	0.256	0.822981	FALSE	FALSE
SIDV3-Region_chr1:7207926-7207946	pool1	chr1	7207926	7207946	2.576	0.032	0.063	0.973793	FALSE	FALSE
SIDV3-Region_chr1:7224709-7224729	pool1	chr1	7224709	7224729	4.099	0.057	0.091	0.928805	FALSE	FALSE
SIDV3-Region_chr1:7224788-7224808	pool1	chr1	7224788	7224808	4.632	-0.1	-0.236	0.690069	FALSE	FALSE
SIDV3-Region_chr1:7224839-7224859	pool1	chr1	7224839	7224859	3.42	-0.429	-0.338	0.659364	FALSE	FALSE
SIDV3-Region_chr1:7224915-7224935	pool1	chr1	7224915	7224935	5.072	-0.069	0.019	0.986719	FALSE	FALSE
SIDV3-Region_chr1:7225059-7225079	pool1	chr1	7225059	7225079	2.629	-0.642	-0.527	0.543498	FALSE	FALSE
SIDV3-Region_chr1:7245923-7245943	pool1	chr1	7245923	7245943	3.862	-0.271	-0.152	0.874127	FALSE	FALSE
SIDV3-Region_chr1:7246071-7246091	pool1	chr1	7246071	7246091	2.254	-0.25	-0.049	0.981198	FALSE	FALSE
SIDV3-Region_chr1:7246143-7246163	pool1	chr1	7246143	7246163	5.116	0.539	0.09	0.911467	FALSE	FALSE
SIDV3-Region_chr1:7246202-7246222	pool1	chr1	7246202	7246222	4.273	-0.152	-0.056	0.960294	FALSE	FALSE
SIDV3-Region_chr1:7468993-7469013	pool1	chr1	7468993	7469013	4.289	0.382	0.356	0.511047	FALSE	FALSE
SIDV3-Region_chr1:7469131-7469151	pool1	chr1	7469131	7469151	3.257	-0.152	-0.135	0.914897	FALSE	FALSE
SIDV3-Region_chr1:7469201-7469221	pool1	chr1	7469201	7469221	4.091	-0.176	-0.15	0.863214	FALSE	FALSE
SIDV3-Region_chr1:7469327-7469347	pool1	chr1	7469327	7469347	3.741	0.113	0.006	0.996714	FALSE	FALSE
SIDV3-Region_chr1:7469552-7469572	pool1	chr1	7469552	7469572	3.267	0.166	0	1	FALSE	FALSE
SIDV3-Region_chr1:7469873-7469893	pool1	chr1	7469873	7469893	4.269	-0.013	0.163	0.827976	FALSE	FALSE
SIDV3-Region_chr1:7470869-7470889	pool1	chr1	7470869	7470889	3.623	-0.12	-0.047	0.973448	FALSE	FALSE
SIDV3-Region_chr1:7471004-7471024	pool1	chr1	7471004	7471024	3.794	-0.159	0.251	0.72883	FALSE	FALSE
SIDV3-Region_chr1:7471075-7471095	pool1	chr1	7471075	7471095	3.086	0.398	-0.01	0.99529	FALSE	FALSE
SIDV3-Region_chr1:7471259-7471279	pool1	chr1	7471259	7471279	2.695	-0.33	0.051	0.979468	FALSE	FALSE
SIDV3-Region_chr1:7471579-7471599	pool1	chr1	7471579	7471599	4.221	-0.213	0.079	0.940561	FALSE	FALSE
SIDV3-Region_chr1:7471794-7471814	pool1	chr1	7471794	7471814	4.748	0.283	0.055	0.958716	FALSE	FALSE
SIDV3-Region_chr1:7471882-7471902	pool1	chr1	7471882	7471902	4.435	-0.23	-0.012	0.9931	FALSE	FALSE
SIDV3-Region_chr1:7471938-7471958	pool1	chr1	7471938	7471958	3.564	-0.353	-0.341	0.62259	FALSE	FALSE
SIDV3-Region_chr1:7471994-7472014	pool1	chr1	7471994	7472014	4.33	0.127	0.234	0.69639	FALSE	FALSE
SIDV3-Region_chr1:7472149-7472169	pool1	chr1	7472149	7472169	5.185	0.361	0.23	0.675926	FALSE	FALSE
SIDV3-Region_chr1:7472210-7472230	pool1	chr1	7472210	7472230	3.469	-0.129	-0.027	0.9862	FALSE	FALSE
SIDV3-Region_chr1:7505608-7505628	pool1	chr1	7505608	7505628	4.386	0.67	0.524	0.0924038	FALSE	FALSE
SIDV3-Region_chr1:7505694-7505714	pool1	chr1	7505694	7505714	1.629	0.738	0.778	0.472396	FALSE	FALSE
SIDV3-Region_chr1:7505826-7505846	pool1	chr1	7505826	7505846	4.046	-0.062	-0.003	0.998308	FALSE	FALSE
SIDV3-Region_chr1:7577217-7577237	pool1	chr1	7577217	7577237	4.38	0.43	0.255	0.648312	FALSE	FALSE
SIDV3-Region_chr1:7577406-7577426	pool1	chr1	7577406	7577426	4.397	0.109	0.088	0.924067	FALSE	FALSE
SIDV3-Region_chr1:7577474-7577494	pool1	chr1	7577474	7577494	4.151	-0.09	-0.18	0.818838	FALSE	FALSE
SIDV3-Region_chr1:7577591-7577611	pool1	chr1	7577591	7577611	3.905	-0.05	-0.055	0.965149	FALSE	FALSE
SIDV3-Region_chr1:7577649-7577669	pool1	chr1	7577649	7577669	3.464	-0.178	-0.386	0.615601	FALSE	FALSE
SIDV3-Region_chr1:7632052-7632072	pool1	chr1	7632052	7632072	2.367	-0.405	-0.365	0.787124	FALSE	FALSE
SIDV3-Region_chr1:7632158-7632178	pool1	chr1	7632158	7632178	3.852	0.222	0.027	0.985591	FALSE	FALSE
SIDV3-Region_chr1:7632270-7632290	pool1	chr1	7632270	7632290	4.369	0.351	0.308	0.536772	FALSE	FALSE
SIDV3-Region_chr1:7632449-7632469	pool1	chr1	7632449	7632469	3.559	0.001	-0.02	0.990671	FALSE	FALSE
SIDV3-Region_chr1:7639919-7639939	pool1	chr1	7639919	7639939	4.295	-0.412	-0.207	0.75224	FALSE	FALSE
SIDV3-Region_chr1:7640022-7640042	pool1	chr1	7640022	7640042	3.599	0.233	-0.023	0.987681	FALSE	FALSE
SIDV3-Region_chr1:7640139-7640159	pool1	chr1	7640139	7640159	4.302	0.222	0.401	0.374269	FALSE	FALSE
SIDV3-Region_chr1:7640208-7640228	pool1	chr1	7640208	7640228	3.18	-1.18	-0.828	0.0455153	TRUE	FALSE
SIDV3-Region_chr1:7640324-7640344	pool1	chr1	7640324	7640344	4.116	0.044	0.11	0.918676	FALSE	FALSE
SIDV3-Region_chr1:7641725-7641745	pool1	chr1	7641725	7641745	3.68	0.205	-0.09	0.937133	FALSE	FALSE
SIDV3-Region_chr1:7641778-7641798	pool1	chr1	7641778	7641798	4.932	0.291	0.043	0.968491	FALSE	FALSE
SIDV3-Region_chr1:7642140-7642160	pool1	chr1	7642140	7642160	3.699	-0.245	-0.235	0.772958	FALSE	FALSE
SIDV3-Region_chr1:7644072-7644092	pool1	chr1	7644072	7644092	4.374	0.161	0.185	0.789812	FALSE	FALSE
SIDV3-Region_chr1:7644159-7644179	pool1	chr1	7644159	7644179	3.887	-0.1	-0.066	0.956961	FALSE	FALSE
SIDV3-Region_chr1:7644250-7644270	pool1	chr1	7644250	7644270	3.824	0.088	-0.007	0.995999	FALSE	FALSE
SIDV3-Region_chr1:7644395-7644415	pool1	chr1	7644395	7644415	2.094	-0.396	-0.275	0.856937	FALSE	FALSE
SIDV3-Region_chr1:7647187-7647207	pool1	chr1	7647187	7647207	4.263	-0.326	-0.216	0.796625	FALSE	FALSE
SIDV3-Region_chr1:7647393-7647413	pool1	chr1	7647393	7647413	3.849	-0.718	-0.539	0.266776	FALSE	FALSE
SIDV3-Region_chr1:7647474-7647494	pool1	chr1	7647474	7647494	3.687	0.42	0.106	0.930162	FALSE	FALSE
SIDV3-Region_chr1:7647601-7647621	pool1	chr1	7647601	7647621	3.986	0.257	0.173	0.847104	FALSE	FALSE
SIDV3-Region_chr1:7651602-7651622	pool1	chr1	7651602	7651622	3.638	0.154	0.051	0.971239	FALSE	FALSE
SIDV3-Region_chr1:7651678-7651698	pool1	chr1	7651678	7651698	3.705	-0.173	-0.167	0.859137	FALSE	FALSE
SIDV3-Region_chr1:7651805-7651825	pool1	chr1	7651805	7651825	3.951	-0.342	-0.242	0.738056	FALSE	FALSE
SIDV3-Region_chr1:7651858-7651878	pool1	chr1	7651858	7651878	4.435	0.773	0.565	0.0484289	FALSE	FALSE
SIDV3-Region_chr1:7651943-7651963	pool1	chr1	7651943	7651963	3.872	0.079	-0.035	0.979555	FALSE	FALSE
SIDV3-Region_chr1:7652053-7652073	pool1	chr1	7652053	7652073	3.795	0.359	0.33	0.632604	FALSE	FALSE
SIDV3-Region_chr1:7652547-7652567	pool1	chr1	7652547	7652567	3.754	-0.071	0.038	0.978491	FALSE	FALSE
SIDV3-Region_chr1:7652652-7652672	pool1	chr1	7652652	7652672	4.05	0.216	0.448	0.432732	FALSE	FALSE
SIDV3-Region_chr1:7652732-7652752	pool1	chr1	7652732	7652752	4.078	-0.28	-0.203	0.786406	FALSE	FALSE
SIDV3-Region_chr1:7667489-7667509	pool1	chr1	7667489	7667509	4.031	0.107	-0.059	0.965416	FALSE	FALSE
SIDV3-Region_chr1:7667582-7667602	pool1	chr1	7667582	7667602	2.775	-0.448	-0.116	0.953213	FALSE	FALSE
SIDV3-Region_chr1:7667641-7667661	pool1	chr1	7667641	7667661	3.492	-0.634	-0.572	0.275174	FALSE	FALSE
SIDV3-Region_chr1:7667692-7667712	pool1	chr1	7667692	7667712	4.26	-0.075	0.126	0.880644	FALSE	FALSE
SIDV3-Region_chr1:7675766-7675786	pool1	chr1	7675766	7675786	4.469	-0.035	0.038	0.973242	FALSE	FALSE
SIDV3-Region_chr1:7675928-7675948	pool1	chr1	7675928	7675948	4.48	0.406	0.38	0.568034	FALSE	FALSE
SIDV3-Region_chr1:7676035-7676055	pool1	chr1	7676035	7676055	3.727	0.188	0.176	0.847876	FALSE	FALSE
SIDV3-Region_chr1:7676098-7676118	pool1	chr1	7676098	7676118	3.24	-0.425	-0.357	0.645866	FALSE	FALSE
SIDV3-Region_chr1:7902715-7902735	pool1	chr1	7902715	7902735	3.952	0.376	0.087	0.946999	FALSE	FALSE
SIDV3-Region_chr1:7902782-7902802	pool1	chr1	7902782	7902802	4.432	-0.053	-0.213	0.747474	FALSE	FALSE
SIDV3-Region_chr1:7902836-7902856	pool1	chr1	7902836	7902856	3.77	-0.024	0.103	0.925768	FALSE	FALSE
SIDV3-Region_chr1:7902891-7902911	pool1	chr1	7902891	7902911	3.659	0.304	0.368	0.582037	FALSE	FALSE
SIDV3-Region_chr1:7932753-7932773	pool1	chr1	7932753	7932773	2.93	-0.033	0.076	0.964389	FALSE	FALSE
SIDV3-Region_chr1:7932813-7932833	pool1	chr1	7932813	7932833	2.865	-0.615	-0.415	0.667262	FALSE	FALSE
SIDV3-Region_chr1:7932975-7932995	pool1	chr1	7932975	7932995	4.587	0.343	0.11	0.894573	FALSE	FALSE
SIDV3-Region_chr1:7933196-7933216	pool1	chr1	7933196	7933216	2.743	0.04	-0.137	0.932929	FALSE	FALSE
SIDV3-CAGE_chr1:7961601-7961621	pool1	chr1	7961601	7961621	4.039	0.352	0.337	0.555012	FALSE	FALSE
SIDV3-CAGE_chr1:7961684-7961704	pool1	chr1	7961684	7961704	4.162	-0.204	-0.189	0.820106	FALSE	FALSE
SIDV3-CAGE_chr1:7961784-7961804	pool1	chr1	7961784	7961804	3.491	-0.137	-0.29	0.712607	FALSE	FALSE
SIDV3-Region_chr1:7975286-7975306	pool1	chr1	7975286	7975306	1.202	-0.017	0.022	0.993802	FALSE	FALSE
SIDV3-Region_chr1:7975359-7975379	pool1	chr1	7975359	7975379	2.955	-0.003	0.332	0.751563	FALSE	FALSE
SIDV3-Region_chr1:7975495-7975515	pool1	chr1	7975495	7975515	2.704	-0.208	-0.062	0.977384	FALSE	FALSE
SIDV3-Region_chr1:7982365-7982385	pool1	chr1	7982365	7982385	4.631	-0.204	-0.303	0.55881	FALSE	FALSE
SIDV3-Region_chr1:7982425-7982445	pool1	chr1	7982425	7982445	4.22	0.033	0.072	0.944163	FALSE	FALSE
SIDV3-Region_chr1:7982480-7982500	pool1	chr1	7982480	7982500	4.727	0.48	0.374	0.491989	FALSE	FALSE
SIDV3-Region_chr1:7982639-7982659	pool1	chr1	7982639	7982659	3.637	0.241	0.261	0.733063	FALSE	FALSE
SIDV3-Region_chr1:8014972-8014992	pool1	chr1	8014972	8014992	2.158	-0.264	0.032	0.989184	FALSE	FALSE
SIDV3-Region_chr1:8015076-8015096	pool1	chr1	8015076	8015096	3.16	-0.221	0.195	0.860285	FALSE	FALSE
SIDV3-Region_chr1:8015335-8015355	pool1	chr1	8015335	8015355	3.72	-0.518	-0.456	0.386065	FALSE	FALSE
SIDV3-Region_chr1:8315784-8315804	pool1	chr1	8315784	8315804	4.137	-0.029	-0.038	0.975509	FALSE	FALSE
SIDV3-Region_chr1:8315986-8316006	pool1	chr1	8315986	8316006	3.956	-0.001	-0.047	0.975248	FALSE	FALSE
SIDV3-Region_chr1:8316047-8316067	pool1	chr1	8316047	8316067	4.862	0.191	-0.175	0.78487	FALSE	FALSE
SIDV3-Region_chr1:8316129-8316149	pool1	chr1	8316129	8316149	3.878	0.263	0.111	0.914603	FALSE	FALSE
SIDV3-Region_chr1:8317638-8317658	pool1	chr1	8317638	8317658	3.139	0.042	0.185	0.880991	FALSE	FALSE
SIDV3-Region_chr1:8317751-8317771	pool1	chr1	8317751	8317771	4.353	-0.661	-0.483	0.220947	FALSE	FALSE
SIDV3-Region_chr1:8317878-8317898	pool1	chr1	8317878	8317898	3.403	0.033	0.277	0.780263	FALSE	FALSE
SIDV3-Region_chr1:8317941-8317961	pool1	chr1	8317941	8317961	4.084	0.082	-0.013	0.993808	FALSE	FALSE
SIDV3-Region_chr1:8339241-8339261	pool1	chr1	8339241	8339261	3.631	-0.246	-0.267	0.77972	FALSE	FALSE
SIDV3-Region_chr1:8339295-8339315	pool1	chr1	8339295	8339315	3.108	-0.433	-0.205	0.857994	FALSE	FALSE
SIDV3-Region_chr1:8339394-8339414	pool1	chr1	8339394	8339414	3.762	0.075	0.085	0.946683	FALSE	FALSE
SIDV3-Region_chr1:8339477-8339497	pool1	chr1	8339477	8339497	4.28	0.057	0.005	0.997537	FALSE	FALSE
SIDV3-Region_chr1:8339598-8339618	pool1	chr1	8339598	8339618	3.974	-0.435	-0.34	0.561504	FALSE	FALSE
SIDV3-Region_chr1:8342310-8342330	pool1	chr1	8342310	8342330	3.736	-0.264	-0.041	0.98021	FALSE	FALSE
SIDV3-Region_chr1:8342444-8342464	pool1	chr1	8342444	8342464	4.117	-0.146	-0.029	0.981921	FALSE	FALSE
SIDV3-Region_chr1:8342534-8342554	pool1	chr1	8342534	8342554	4.248	-0.076	-0.126	0.881218	FALSE	FALSE
SIDV3-Region_chr1:8343746-8343766	pool1	chr1	8343746	8343766	4.58	-0.138	0.035	0.974518	FALSE	FALSE
SIDV3-Region_chr1:8343851-8343871	pool1	chr1	8343851	8343871	4.066	0.534	0.474	0.293345	FALSE	FALSE
SIDV3-Region_chr1:8343961-8343981	pool1	chr1	8343961	8343981	4.127	-0.165	-0.29	0.634012	FALSE	FALSE
SIDV3-Region_chr1:8344083-8344103	pool1	chr1	8344083	8344103	3.587	0.089	0.214	0.843026	FALSE	FALSE
SIDV3-Region_chr1:8344171-8344191	pool1	chr1	8344171	8344191	4.381	0.285	0.084	0.92766	FALSE	FALSE
SIDV3-Region_chr1:8348943-8348963	pool1	chr1	8348943	8348963	4.619	-0.081	0.055	0.959126	FALSE	FALSE
SIDV3-Region_chr1:8348995-8349015	pool1	chr1	8348995	8349015	5.002	0.511	0.098	0.908542	FALSE	FALSE
SIDV3-Region_chr1:8349058-8349078	pool1	chr1	8349058	8349078	3.64	0.164	0.183	0.870943	FALSE	FALSE
SIDV3-Region_chr1:8349154-8349174	pool1	chr1	8349154	8349174	4.755	0.161	-0.016	0.9895	FALSE	FALSE
SIDV3-Region_chr1:8349355-8349375	pool1	chr1	8349355	8349375	3.519	0.211	0.21	0.81643	FALSE	FALSE
SIDV3-Region_chr1:8351627-8351647	pool1	chr1	8351627	8351647	3.708	0.042	0.105	0.945153	FALSE	FALSE
SIDV3-Region_chr1:8351742-8351762	pool1	chr1	8351742	8351762	3.496	0.072	0.151	0.888023	FALSE	FALSE
SIDV3-Region_chr1:8351828-8351848	pool1	chr1	8351828	8351848	3.358	0.062	-0.032	0.983061	FALSE	FALSE
SIDV3-Region_chr1:8351892-8351912	pool1	chr1	8351892	8351912	2.308	-0.247	0.073	0.970766	FALSE	FALSE
SIDV3-Region_chr1:8352017-8352037	pool1	chr1	8352017	8352037	3.699	0.014	0.108	0.936047	FALSE	FALSE
SIDV3-Region_chr1:8353431-8353451	pool1	chr1	8353431	8353451	4.093	-0.109	-0.228	0.746225	FALSE	FALSE
SIDV3-Region_chr1:8353516-8353536	pool1	chr1	8353516	8353536	4.043	-0.339	-0.162	0.897634	FALSE	FALSE
SIDV3-Region_chr1:8353588-8353608	pool1	chr1	8353588	8353608	3.937	-0.101	-0.095	0.928209	FALSE	FALSE
SIDV3-Region_chr1:8353642-8353662	pool1	chr1	8353642	8353662	4.239	-0.153	-0.036	0.978646	FALSE	FALSE
SIDV3-Region_chr1:8353774-8353794	pool1	chr1	8353774	8353794	4.458	0.01	0.25	0.693747	FALSE	FALSE
SIDV3-Region_chr1:8359290-8359310	pool1	chr1	8359290	8359310	4.406	0.239	0.097	0.92311	FALSE	FALSE
SIDV3-Region_chr1:8359428-8359448	pool1	chr1	8359428	8359448	4.28	0.248	0.154	0.850577	FALSE	FALSE
SIDV3-Region_chr1:8359492-8359512	pool1	chr1	8359492	8359512	4.269	0.026	-0.091	0.92404	FALSE	FALSE
SIDV3-Region_chr1:8359581-8359601	pool1	chr1	8359581	8359601	4.833	0.515	0.244	0.653784	FALSE	FALSE
SIDV3-Region_chr1:8359642-8359662	pool1	chr1	8359642	8359662	4.612	0.2	0.015	0.990438	FALSE	FALSE
SIDV3-Region_chr1:8374777-8374797	pool1	chr1	8374777	8374797	4.024	-0.028	-0.036	0.979587	FALSE	FALSE
SIDV3-Region_chr1:8374896-8374916	pool1	chr1	8374896	8374916	4.397	0.124	0.12	0.884791	FALSE	FALSE
SIDV3-Region_chr1:8374987-8375007	pool1	chr1	8374987	8375007	4.08	0.667	0.788	0.016733	FALSE	TRUE
SIDV3-Region_chr1:8439502-8439522	pool1	chr1	8439502	8439522	2.174	-0.772	-0.328	0.817103	FALSE	FALSE
SIDV3-Region_chr1:8439639-8439659	pool1	chr1	8439639	8439659	4.297	0.24	0.103	0.909744	FALSE	FALSE
SIDV3-Region_chr1:8439725-8439745	pool1	chr1	8439725	8439745	4.191	0.429	0.232	0.723857	FALSE	FALSE
SIDV3-CAGE_chr1:8703102-8703122	pool1	chr1	8703102	8703122	3.581	0.58	0.594	0.232595	FALSE	FALSE
SIDV3-CAGE_chr1:8703214-8703234	pool1	chr1	8703214	8703234	3.661	0.381	0.192	0.829595	FALSE	FALSE
SIDV3-CAGE_chr1:8703288-8703308	pool1	chr1	8703288	8703308	4.291	0.163	0.277	0.620496	FALSE	FALSE
SIDV3-CAGE_chr1:8703395-8703415	pool1	chr1	8703395	8703415	4.507	0.146	0.068	0.943226	FALSE	FALSE
SIDV3-Region_chr1:8862451-8862471	pool1	chr1	8862451	8862471	4.569	0.192	0.036	0.975486	FALSE	FALSE
SIDV3-Region_chr1:8862552-8862572	pool1	chr1	8862552	8862572	2.937	-0.269	-0.372	0.675766	FALSE	FALSE
SIDV3-Region_chr1:8862626-8862646	pool1	chr1	8862626	8862646	2.578	-0.176	-0.069	0.978646	FALSE	FALSE
SIDV3-Region_chr1:8862772-8862792	pool1	chr1	8862772	8862792	3.438	-0.346	-0.044	0.976597	FALSE	FALSE
SIDV3-Region_chr1:8871492-8871512	pool1	chr1	8871492	8871512	3.976	0.151	-0.073	0.956975	FALSE	FALSE
SIDV3-Region_chr1:8871669-8871689	pool1	chr1	8871669	8871689	4.784	-0.099	0.025	0.981724	FALSE	FALSE
SIDV3-Region_chr1:8871797-8871817	pool1	chr1	8871797	8871817	4.096	-0.114	-0.218	0.763103	FALSE	FALSE
SIDV3-CAGE_chr1:8878401-8878421	pool1	chr1	8878401	8878421	4.241	-0.036	0.006	0.996314	FALSE	FALSE
SIDV3-CAGE_chr1:8878470-8878490	pool1	chr1	8878470	8878490	4.147	0.105	0.111	0.912983	FALSE	FALSE
SIDV3-CAGE_chr1:8878548-8878568	pool1	chr1	8878548	8878568	3.476	-0.197	-0.1	0.934998	FALSE	FALSE
SIDV3-CAGE_chr1:8878629-8878649	pool1	chr1	8878629	8878649	3.587	-0.622	-0.316	0.679301	FALSE	FALSE
SIDV3-Region_chr1:8878737-8878757	pool1	chr1	8878737	8878757	3.866	-0.244	0.135	0.888699	FALSE	FALSE
SIDV3-Region_chr1:8878805-8878825	pool1	chr1	8878805	8878825	4.2	0.227	0.1	0.918062	FALSE	FALSE
SIDV3-Region_chr1:8878903-8878923	pool1	chr1	8878903	8878923	4.141	-0.097	0.052	0.964978	FALSE	FALSE
SIDV3-Region_chr1:8879089-8879109	pool1	chr1	8879089	8879109	4.686	0.069	-0.076	0.932395	FALSE	FALSE
SIDV3-Region_chr1:8879158-8879178	pool1	chr1	8879158	8879178	4.284	-0.312	-0.143	0.856937	FALSE	FALSE
SIDV3-Region_chr1:8879254-8879274	pool1	chr1	8879254	8879274	4.004	-0.379	-0.273	0.69127	FALSE	FALSE
SIDV3-Region_chr1:8879311-8879331	pool1	chr1	8879311	8879331	3.724	0.061	-0.086	0.943066	FALSE	FALSE
SIDV3-Region_chr1:8879392-8879412	pool1	chr1	8879392	8879412	3.97	-0.21	-0.342	0.54597	FALSE	FALSE
SIDV3-Region_chr1:8879468-8879488	pool1	chr1	8879468	8879488	3.641	0.032	-0.145	0.898384	FALSE	FALSE
SIDV3-Region_chr1:8879548-8879568	pool1	chr1	8879548	8879568	3.701	0.052	-0.032	0.981805	FALSE	FALSE
SIDV3-Region_chr1:8879620-8879640	pool1	chr1	8879620	8879640	3.573	0	0.232	0.834535	FALSE	FALSE
SIDV3-Region_chr1:8879675-8879695	pool1	chr1	8879675	8879695	4.025	0.052	0.009	0.995174	FALSE	FALSE
SIDV3-Region_chr1:8889994-8890014	pool1	chr1	8889994	8890014	0.77	-1.619	-0.93	0.500899	FALSE	FALSE
SIDV3-Region_chr1:8890072-8890092	pool1	chr1	8890072	8890092	4.133	-0.058	-0.093	0.943226	FALSE	FALSE
SIDV3-Region_chr1:8890165-8890185	pool1	chr1	8890165	8890185	3.948	-0.024	0.1	0.952768	FALSE	FALSE
SIDV3-Region_chr1:8890239-8890259	pool1	chr1	8890239	8890259	3.49	-0.176	0.231	0.815116	FALSE	FALSE
SIDV3-Region_chr1:8910369-8910389	pool1	chr1	8910369	8910389	3.897	-0.133	-0.175	0.860666	FALSE	FALSE
SIDV3-Region_chr1:8910501-8910521	pool1	chr1	8910501	8910521	3.663	-0.088	-0.201	0.815956	FALSE	FALSE
SIDV3-Region_chr1:8910650-8910670	pool1	chr1	8910650	8910670	3.848	0.089	0.239	0.748377	FALSE	FALSE
SIDV3-Region_chr1:8911057-8911077	pool1	chr1	8911057	8911077	3.227	0.039	0.232	0.82802	FALSE	FALSE
SIDV3-Region_chr1:8911194-8911214	pool1	chr1	8911194	8911214	3.298	-0.049	0.125	0.924745	FALSE	FALSE
SIDV3-Region_chr1:8911386-8911406	pool1	chr1	8911386	8911406	4.297	0.06	0.094	0.929113	FALSE	FALSE
SIDV3-Region_chr1:9010057-9010077	pool1	chr1	9010057	9010077	4.477	0.143	-0.093	0.928284	FALSE	FALSE
SIDV3-Region_chr1:9010150-9010170	pool1	chr1	9010150	9010170	4.446	-0.104	0.029	0.98021	FALSE	FALSE
SIDV3-Region_chr1:9010277-9010297	pool1	chr1	9010277	9010297	3.834	-0.196	0.083	0.940726	FALSE	FALSE
SIDV3-Region_chr1:9010330-9010350	pool1	chr1	9010330	9010350	3.366	0.027	0.052	0.974676	FALSE	FALSE
SIDV3-Region_chr1:9024756-9024776	pool1	chr1	9024756	9024776	3.796	-0.099	0.146	0.899061	FALSE	FALSE
SIDV3-Region_chr1:9024877-9024897	pool1	chr1	9024877	9024897	4.141	0.255	0.004	0.997537	FALSE	FALSE
SIDV3-Region_chr1:9024930-9024950	pool1	chr1	9024930	9024950	4.184	0.221	0.256	0.697404	FALSE	FALSE
SIDV3-Region_chr1:9025037-9025057	pool1	chr1	9025037	9025057	3.768	-0.016	0.003	0.998581	FALSE	FALSE
SIDV3-Region_chr1:9058384-9058404	pool1	chr1	9058384	9058404	4.163	0.065	-0.031	0.981852	FALSE	FALSE
SIDV3-Region_chr1:9058578-9058598	pool1	chr1	9058578	9058598	4.495	0.485	0.498	0.280708	FALSE	FALSE
SIDV3-Region_chr1:9058675-9058695	pool1	chr1	9058675	9058695	4.514	-0.005	-0.017	0.990091	FALSE	FALSE
SIDV3-Region_chr1:9069569-9069589	pool1	chr1	9069569	9069589	2.852	0.418	0.665	0.364034	FALSE	FALSE
SIDV3-Region_chr1:9069747-9069767	pool1	chr1	9069747	9069767	3.509	-0.267	-0.332	0.656578	FALSE	FALSE
SIDV3-Region_chr1:9069818-9069838	pool1	chr1	9069818	9069838	2.755	0.329	0.423	0.64465	FALSE	FALSE
SIDV3-Region_chr1:9069909-9069929	pool1	chr1	9069909	9069929	4.129	0.164	0.162	0.857391	FALSE	FALSE
SIDV3-Region_chr1:9094073-9094093	pool1	chr1	9094073	9094093	3.666	-0.239	-0.252	0.765641	FALSE	FALSE
SIDV3-Region_chr1:9094190-9094210	pool1	chr1	9094190	9094210	3.834	0.403	0.353	0.631414	FALSE	FALSE
SIDV3-Region_chr1:9094326-9094346	pool1	chr1	9094326	9094346	4.624	0.187	0.139	0.849829	FALSE	FALSE
SIDV3-CAGE_chr1:9234760-9234780	pool1	chr1	9234760	9234780	3.612	-0.096	-0.273	0.727909	FALSE	FALSE
SIDV3-Region_chr1:9234845-9234865	pool1	chr1	9234845	9234865	3.681	0.1	0	0.999823	FALSE	FALSE
SIDV3-Region_chr1:9234918-9234938	pool1	chr1	9234918	9234938	4.052	-0.168	0.212	0.832571	FALSE	FALSE
SIDV3-Region_chr1:9234990-9235010	pool1	chr1	9234990	9235010	4.015	-0.172	0.032	0.980361	FALSE	FALSE
SIDV3-Region_chr1:9235052-9235072	pool1	chr1	9235052	9235072	3.445	-0.099	-0.009	0.995564	FALSE	FALSE
SIDV3-Region_chr1:9235104-9235124	pool1	chr1	9235104	9235124	3.548	-0.045	0.099	0.933404	FALSE	FALSE
SIDV3-Region_chr1:9235184-9235204	pool1	chr1	9235184	9235204	4.491	0.355	0.035	0.974843	FALSE	FALSE
SIDV3-Region_chr1:9235315-9235335	pool1	chr1	9235315	9235335	3.363	0.085	0.146	0.905602	FALSE	FALSE
SIDV3-Region_chr1:9257556-9257576	pool1	chr1	9257556	9257576	3.633	-0.096	-0.179	0.856937	FALSE	FALSE
SIDV3-Region_chr1:9257626-9257646	pool1	chr1	9257626	9257646	3.431	-0.208	-0.203	0.833889	FALSE	FALSE
SIDV3-Region_chr1:9257696-9257716	pool1	chr1	9257696	9257716	4.178	0.139	0.195	0.795626	FALSE	FALSE
SIDV3-Region_chr1:9257757-9257777	pool1	chr1	9257757	9257777	3.099	0.387	0.252	0.82357	FALSE	FALSE
SIDV3-Region_chr1:9257876-9257896	pool1	chr1	9257876	9257896	4.345	0.102	0.175	0.832156	FALSE	FALSE
SIDV3-Region_chr1:9257947-9257967	pool1	chr1	9257947	9257967	3.48	-0.269	-0.241	0.780707	FALSE	FALSE
SIDV3-Region_chr1:9267257-9267277	pool1	chr1	9267257	9267277	3.658	-0.2	-0.139	0.911921	FALSE	FALSE
SIDV3-Region_chr1:9267341-9267361	pool1	chr1	9267341	9267361	3.277	0.685	0.883	0.0171341	FALSE	TRUE
SIDV3-Region_chr1:9267424-9267444	pool1	chr1	9267424	9267444	3.933	0.004	0.103	0.928657	FALSE	FALSE
SIDV3-Region_chr1:9267537-9267557	pool1	chr1	9267537	9267557	3.68	-0.191	-0.017	0.991664	FALSE	FALSE
SIDV3-CAGE_chr1:9588817-9588837	pool1	chr1	9588817	9588837	3.163	-0.183	-0.357	0.700719	FALSE	FALSE
SIDV3-CAGE_chr1:9588907-9588927	pool1	chr1	9588907	9588927	4.502	-0.098	-0.048	0.970093	FALSE	FALSE
SIDV3-CAGE_chr1:9589037-9589057	pool1	chr1	9589037	9589057	3.999	-0.236	-0.222	0.783209	FALSE	FALSE
SIDV3-CAGE_chr1:9589116-9589136	pool1	chr1	9589116	9589136	4.167	0.095	-0.059	0.959743	FALSE	FALSE
SIDV3-Region_chr1:9593812-9593832	pool1	chr1	9593812	9593832	3.392	-0.252	-0.002	0.998984	FALSE	FALSE
SIDV3-Region_chr1:9593902-9593922	pool1	chr1	9593902	9593922	2.618	-0.989	-0.57	0.467162	FALSE	FALSE
SIDV3-Region_chr1:9594011-9594031	pool1	chr1	9594011	9594031	4.315	-0.195	-0.092	0.92488	FALSE	FALSE
SIDV3-Region_chr1:9594083-9594103	pool1	chr1	9594083	9594103	4.081	0.335	0.31	0.580223	FALSE	FALSE
SIDV3-Region_chr1:9594202-9594222	pool1	chr1	9594202	9594222	4.343	-0.445	-0.081	0.93293	FALSE	FALSE
SIDV3-Region_chr1:9594978-9594998	pool1	chr1	9594978	9594998	4.344	0.165	0.161	0.833846	FALSE	FALSE
SIDV3-Region_chr1:9595086-9595106	pool1	chr1	9595086	9595106	4.298	0.241	0.055	0.959855	FALSE	FALSE
SIDV3-Region_chr1:9595156-9595176	pool1	chr1	9595156	9595176	3.507	-0.298	-0.204	0.840989	FALSE	FALSE
SIDV3-Region_chr1:9595213-9595233	pool1	chr1	9595213	9595233	3.731	-0.438	-0.175	0.874921	FALSE	FALSE
SIDV3-Region_chr1:9595286-9595306	pool1	chr1	9595286	9595306	4.35	0.181	0.136	0.86115	FALSE	FALSE
SIDV3-Region_chr1:9601027-9601047	pool1	chr1	9601027	9601047	4.914	0.08	0.221	0.675905	FALSE	FALSE
SIDV3-Region_chr1:9601171-9601191	pool1	chr1	9601171	9601191	3.42	-0.134	-0.03	0.984503	FALSE	FALSE
SIDV3-Region_chr1:9601273-9601293	pool1	chr1	9601273	9601293	3.876	0.18	-0.064	0.968619	FALSE	FALSE
SIDV3-Region_chr1:9601372-9601392	pool1	chr1	9601372	9601392	4.595	0.463	0.329	0.632992	FALSE	FALSE
SIDV3-Region_chr1:9601442-9601462	pool1	chr1	9601442	9601462	4.88	0.103	-0.092	0.91017	FALSE	FALSE
SIDV3-Region_chr1:9604121-9604141	pool1	chr1	9604121	9604141	4.399	0.007	0.253	0.714945	FALSE	FALSE
SIDV3-Region_chr1:9604191-9604211	pool1	chr1	9604191	9604211	3.99	-0.52	-0.098	0.924961	FALSE	FALSE
SIDV3-Region_chr1:9604268-9604288	pool1	chr1	9604268	9604288	4.587	-0.414	-0.2	0.744295	FALSE	FALSE
SIDV3-Region_chr1:9604381-9604401	pool1	chr1	9604381	9604401	2.857	-0.321	-0.478	0.585452	FALSE	FALSE
SIDV3-Region_chr1:9604497-9604517	pool1	chr1	9604497	9604517	4.234	0.305	0.267	0.659851	FALSE	FALSE
SIDV3-Region_chr1:9627010-9627030	pool1	chr1	9627010	9627030	2.449	-0.448	-0.194	0.892289	FALSE	FALSE
SIDV3-Region_chr1:9627083-9627103	pool1	chr1	9627083	9627103	2.731	-0.201	0.025	0.991664	FALSE	FALSE
SIDV3-Region_chr1:9627171-9627191	pool1	chr1	9627171	9627191	4.392	-0.02	-0.067	0.950098	FALSE	FALSE
SIDV3-Region_chr1:9627233-9627253	pool1	chr1	9627233	9627253	4.262	-0.097	-0.063	0.95616	FALSE	FALSE
SIDV3-Region_chr1:9627296-9627316	pool1	chr1	9627296	9627316	4.419	-0.019	-0.161	0.823773	FALSE	FALSE
SIDV3-Region_chr1:9627358-9627378	pool1	chr1	9627358	9627378	3.79	0.265	-0.005	0.997537	FALSE	FALSE
SIDV3-Region_chr1:9627410-9627430	pool1	chr1	9627410	9627430	4.322	0.082	0.031	0.98021	FALSE	FALSE
SIDV3-Region_chr1:9651737-9651757	pool1	chr1	9651737	9651757	3.538	-0.43	-0.514	0.403438	FALSE	FALSE
SIDV3-Region_chr1:9651812-9651832	pool1	chr1	9651812	9651832	3.815	-0.123	-0.004	0.998037	FALSE	FALSE
SIDV3-Region_chr1:9651864-9651884	pool1	chr1	9651864	9651884	3.437	-0.177	-0.219	0.819738	FALSE	FALSE
SIDV3-Region_chr1:9651952-9651972	pool1	chr1	9651952	9651972	3.96	-0.193	-0.042	0.973793	FALSE	FALSE
SIDV3-Region_chr1:9652006-9652026	pool1	chr1	9652006	9652026	3.981	-0.102	-0.205	0.787124	FALSE	FALSE
SIDV3-Region_chr1:9652105-9652125	pool1	chr1	9652105	9652125	4.671	-0.124	-0.072	0.937133	FALSE	FALSE
SIDV3-Region_chr1:9652206-9652226	pool1	chr1	9652206	9652226	4.385	0.093	-0.006	0.995999	FALSE	FALSE
SIDV3-Region_chr1:9652289-9652309	pool1	chr1	9652289	9652309	3.991	-0.353	-0.304	0.640082	FALSE	FALSE
SIDV3-Region_chr1:9652394-9652414	pool1	chr1	9652394	9652414	3.696	-0.041	0.081	0.950241	FALSE	FALSE
SIDV3-Region_chr1:9652460-9652480	pool1	chr1	9652460	9652480	4.38	-0.177	-0.179	0.791842	FALSE	FALSE
SIDV3-Region_chr1:9652692-9652712	pool1	chr1	9652692	9652712	3.934	-0.003	0.17	0.845836	FALSE	FALSE
SIDV3-Region_chr1:9652781-9652801	pool1	chr1	9652781	9652801	3.811	-0.375	-0.116	0.917746	FALSE	FALSE
SIDV3-Region_chr1:9652986-9653006	pool1	chr1	9652986	9653006	3.812	0.011	-0.123	0.908341	FALSE	FALSE
SIDV3-Region_chr1:9653081-9653101	pool1	chr1	9653081	9653101	4.382	0.886	0.55	0.148701	FALSE	FALSE
SIDV3-Region_chr1:9653209-9653229	pool1	chr1	9653209	9653229	3.438	0.012	-0.112	0.932929	FALSE	FALSE
SIDV3-Region_chr1:9653448-9653468	pool1	chr1	9653448	9653468	3.744	-0.033	0.009	0.995252	FALSE	FALSE
SIDV3-Region_chr1:9653513-9653533	pool1	chr1	9653513	9653533	2.25	-0.169	-0.586	0.58142	FALSE	FALSE
SIDV3-Region_chr1:9654161-9654181	pool1	chr1	9654161	9654181	3.295	0.215	0.373	0.686938	FALSE	FALSE
SIDV3-Region_chr1:9654298-9654318	pool1	chr1	9654298	9654318	4.22	-0.048	0.147	0.878419	FALSE	FALSE
SIDV3-Region_chr1:9654443-9654463	pool1	chr1	9654443	9654463	4.821	0.004	-0.152	0.817093	FALSE	FALSE
SIDV3-Region_chr1:9702279-9702299	pool1	chr1	9702279	9702299	3.471	-0.448	-0.501	0.3626	FALSE	FALSE
SIDV3-Region_chr1:9702370-9702390	pool1	chr1	9702370	9702390	3.454	-0.453	-0.273	0.744179	FALSE	FALSE
SIDV3-Region_chr1:9702431-9702451	pool1	chr1	9702431	9702451	5.03	0.636	0.3	0.499828	FALSE	FALSE
SIDV3-Region_chr1:9717358-9717378	pool1	chr1	9717358	9717378	4.482	-0.058	-0.247	0.684696	FALSE	FALSE
SIDV3-Region_chr1:9717447-9717467	pool1	chr1	9717447	9717467	4.023	0.121	0.169	0.877834	FALSE	FALSE
SIDV3-Region_chr1:9717572-9717592	pool1	chr1	9717572	9717592	4.574	0.39	0.329	0.459124	FALSE	FALSE
SIDV3-Region_chr1:9717672-9717692	pool1	chr1	9717672	9717692	3.997	0.112	0.303	0.624878	FALSE	FALSE
SIDV3-Region_chr1:9720335-9720355	pool1	chr1	9720335	9720355	4.007	-0.105	-0.055	0.966209	FALSE	FALSE
SIDV3-Region_chr1:9720483-9720503	pool1	chr1	9720483	9720503	4.227	0.183	-0.188	0.797017	FALSE	FALSE
SIDV3-Region_chr1:9720580-9720600	pool1	chr1	9720580	9720600	4.378	0.192	0.218	0.749336	FALSE	FALSE
SIDV3-Region_chr1:9720633-9720653	pool1	chr1	9720633	9720653	4	0.374	0.33	0.557106	FALSE	FALSE
SIDV3-Region_chr1:9720684-9720704	pool1	chr1	9720684	9720704	3.971	0.214	0.018	0.990091	FALSE	FALSE
SIDV3-Region_chr1:9721763-9721783	pool1	chr1	9721763	9721783	4.004	-0.23	0.046	0.972857	FALSE	FALSE
SIDV3-Region_chr1:9721899-9721919	pool1	chr1	9721899	9721919	4.052	0.094	0.136	0.878324	FALSE	FALSE
SIDV3-Region_chr1:9722063-9722083	pool1	chr1	9722063	9722083	3.874	-0.52	-0.391	0.486431	FALSE	FALSE
SIDV3-Region_chr1:9722187-9722207	pool1	chr1	9722187	9722207	3.754	-0.656	-0.359	0.572901	FALSE	FALSE
SIDV3-Region_chr1:9724987-9725007	pool1	chr1	9724987	9725007	3.59	0.242	0.098	0.937753	FALSE	FALSE
SIDV3-Region_chr1:9725056-9725076	pool1	chr1	9725056	9725076	4.347	0.45	0.134	0.869498	FALSE	FALSE
SIDV3-Region_chr1:9725204-9725224	pool1	chr1	9725204	9725224	3.645	0.061	-0.205	0.815236	FALSE	FALSE
SIDV3-Region_chr1:9851996-9852016	pool1	chr1	9851996	9852016	3.381	0.533	0.421	0.632845	FALSE	FALSE
SIDV3-Region_chr1:9852066-9852086	pool1	chr1	9852066	9852086	3.865	0.224	0.236	0.764905	FALSE	FALSE
SIDV3-Region_chr1:9852160-9852180	pool1	chr1	9852160	9852180	4.524	0.311	0.267	0.659703	FALSE	FALSE
SIDV3-Region_chr1:9852379-9852399	pool1	chr1	9852379	9852399	3.902	0.471	0.298	0.631709	FALSE	FALSE
SIDV3-CAGE_chr1:9909942-9909962	pool1	chr1	9909942	9909962	4.373	0.134	0.178	0.844917	FALSE	FALSE
SIDV3-CAGE_chr1:9910003-9910023	pool1	chr1	9910003	9910023	4.021	-0.053	-0.318	0.602713	FALSE	FALSE
SIDV3-CAGE_chr1:9910059-9910079	pool1	chr1	9910059	9910079	4.081	0.016	0.059	0.963474	FALSE	FALSE
SIDV3-CAGE_chr1:9910145-9910165	pool1	chr1	9910145	9910165	4.03	0.568	0.564	0.12236	FALSE	FALSE
SIDV3-CAGE_chr1:9910237-9910257	pool1	chr1	9910237	9910257	4.426	0.662	0.677	0.00669116	FALSE	TRUE
SIDV3-CAGE_chr1:10210480-10210500	pool1	chr1	10210480	10210500	3.559	-0.445	-0.113	0.925411	FALSE	FALSE
SIDV3-CAGE_chr1:10210572-10210592	pool1	chr1	10210572	10210592	4.064	-0.051	-0.044	0.971324	FALSE	FALSE
SIDV3-CAGE_chr1:10210660-10210680	pool1	chr1	10210660	10210680	4.674	0.469	0.349	0.471483	FALSE	FALSE
SIDV3-CAGE_chr1:10210771-10210791	pool1	chr1	10210771	10210791	3.743	0.018	-0.113	0.920402	FALSE	FALSE
SIDV3-Region_chr1:10377385-10377405	pool1	chr1	10377385	10377405	3.408	0.015	0.207	0.836267	FALSE	FALSE
SIDV3-Region_chr1:10377570-10377590	pool1	chr1	10377570	10377590	3.363	0.042	-0.274	0.755993	FALSE	FALSE
SIDV3-Region_chr1:10377631-10377651	pool1	chr1	10377631	10377651	1.892	0.241	0.223	0.888615	FALSE	FALSE
SIDV3-CAGE_chr1:10398982-10399002	pool1	chr1	10398982	10399002	3.56	0.213	-0.152	0.88331	FALSE	FALSE
SIDV3-CAGE_chr1:10399051-10399071	pool1	chr1	10399051	10399071	2.831	-1.271	-1.179	0.00187158	TRUE	FALSE
SIDV3-CAGE_chr1:10399112-10399132	pool1	chr1	10399112	10399132	3.696	-0.819	-0.909	0.00318632	TRUE	FALSE
SIDV3-CAGE_chr1:10399197-10399217	pool1	chr1	10399197	10399217	3.945	0.012	-0.042	0.973469	FALSE	FALSE
SIDV3-CAGE_chr1:10399259-10399279	pool1	chr1	10399259	10399279	4.191	-0.757	-0.625	0.0546557	FALSE	FALSE
SIDV3-CAGE_chr1:10399312-10399332	pool1	chr1	10399312	10399332	3.207	-0.477	-0.262	0.790633	FALSE	FALSE
SIDV3-Region_chr1:10415315-10415335	pool1	chr1	10415315	10415335	3.58	0.518	0.192	0.836654	FALSE	FALSE
SIDV3-Region_chr1:10415425-10415445	pool1	chr1	10415425	10415445	2.252	0.116	-0.06	0.978935	FALSE	FALSE
SIDV3-Region_chr1:10415531-10415551	pool1	chr1	10415531	10415551	2.726	-0.195	0.164	0.911768	FALSE	FALSE
SIDV3-Region_chr1:10419356-10419376	pool1	chr1	10419356	10419376	3.461	-0.502	-0.219	0.834535	FALSE	FALSE
SIDV3-Region_chr1:10419464-10419484	pool1	chr1	10419464	10419484	3.555	0.282	0.371	0.564522	FALSE	FALSE
SIDV3-Region_chr1:10419560-10419580	pool1	chr1	10419560	10419580	4.382	0.053	0.146	0.846955	FALSE	FALSE
SIDV3-Region_chr1:10430126-10430146	pool1	chr1	10430126	10430146	3.059	0.121	0.095	0.953014	FALSE	FALSE
SIDV3-Region_chr1:10430232-10430252	pool1	chr1	10430232	10430252	4.568	0.02	-0.05	0.96667	FALSE	FALSE
SIDV3-Region_chr1:10430326-10430346	pool1	chr1	10430326	10430346	3.479	0.138	0.192	0.851153	FALSE	FALSE
SIDV3-Region_chr1:10430416-10430436	pool1	chr1	10430416	10430436	3.398	-0.46	-0.36	0.674521	FALSE	FALSE
SIDV3-Region_chr1:10430561-10430581	pool1	chr1	10430561	10430581	3.438	0.062	0.251	0.771234	FALSE	FALSE
SIDV3-Region_chr1:10471804-10471824	pool1	chr1	10471804	10471824	3.111	0.036	0.316	0.759512	FALSE	FALSE
SIDV3-Region_chr1:10471881-10471901	pool1	chr1	10471881	10471901	3.893	0.314	-0.057	0.963816	FALSE	FALSE
SIDV3-Region_chr1:10471957-10471977	pool1	chr1	10471957	10471977	3.97	-0.04	0.054	0.968612	FALSE	FALSE
SIDV3-Region_chr1:10472116-10472136	pool1	chr1	10472116	10472136	4.326	0.435	0.415	0.364034	FALSE	FALSE
SIDV3-Region_chr1:10472182-10472202	pool1	chr1	10472182	10472202	3.703	-0.263	-0.168	0.884544	FALSE	FALSE
SIDV3-Region_chr1:10472250-10472270	pool1	chr1	10472250	10472270	3.464	-0.018	0.045	0.976293	FALSE	FALSE
SIDV3-Region_chr1:10472358-10472378	pool1	chr1	10472358	10472378	4.434	0.205	0.108	0.896986	FALSE	FALSE
SIDV3-Region_chr1:10472436-10472456	pool1	chr1	10472436	10472456	2.936	-0.019	-0.006	0.997585	FALSE	FALSE
SIDV3-Region_chr1:10472533-10472553	pool1	chr1	10472533	10472553	5.166	0.185	0.082	0.920738	FALSE	FALSE
SIDV3-CAGE_chr1:10474917-10474937	pool1	chr1	10474917	10474937	3.48	-0.505	-0.522	0.360107	FALSE	FALSE
SIDV3-Region_chr1:10474959-10474979	pool1	chr1	10474959	10474979	4.419	0.455	-0.074	0.940668	FALSE	FALSE
SIDV3-Region_chr1:10475022-10475042	pool1	chr1	10475022	10475042	1.624	0.17	0.213	0.905746	FALSE	FALSE
SIDV3-Region_chr1:10475086-10475106	pool1	chr1	10475086	10475106	4.21	-0.182	-0.009	0.995043	FALSE	FALSE
SIDV3-Region_chr1:10475170-10475190	pool1	chr1	10475170	10475190	4.359	0.263	0.225	0.744295	FALSE	FALSE
SIDV3-Region_chr1:10475304-10475324	pool1	chr1	10475304	10475324	3.506	-0.329	-0.244	0.802441	FALSE	FALSE
SIDV3-Region_chr1:10475361-10475381	pool1	chr1	10475361	10475381	4.054	0.345	0.325	0.59308	FALSE	FALSE
SIDV3-Region_chr1:10475469-10475489	pool1	chr1	10475469	10475489	4.08	-0.645	-0.414	0.373206	FALSE	FALSE
SIDV3-Region_chr1:10494580-10494600	pool1	chr1	10494580	10494600	3.336	0.45	0.316	0.746638	FALSE	FALSE
SIDV3-Region_chr1:10494790-10494810	pool1	chr1	10494790	10494810	3.017	-0.364	-0.651	0.282254	FALSE	FALSE
SIDV3-Region_chr1:10494937-10494957	pool1	chr1	10494937	10494957	3.464	-0.111	-0.319	0.778911	FALSE	FALSE
SIDV3-Region_chr1:10495021-10495041	pool1	chr1	10495021	10495041	3.476	0.187	0.194	0.855076	FALSE	FALSE
SIDV3-Region_chr1:10634543-10634563	pool1	chr1	10634543	10634563	4.001	0.061	0.002	0.998984	FALSE	FALSE
SIDV3-Region_chr1:10634646-10634666	pool1	chr1	10634646	10634666	4.721	0.013	-0.085	0.92488	FALSE	FALSE
SIDV3-Region_chr1:10634713-10634733	pool1	chr1	10634713	10634733	4.363	0.218	0.145	0.85659	FALSE	FALSE
SIDV3-Region_chr1:10634787-10634807	pool1	chr1	10634787	10634807	4.347	0.091	0.087	0.929136	FALSE	FALSE
SIDV3-Region_chr1:10634856-10634876	pool1	chr1	10634856	10634876	4.205	-0.028	0.072	0.944764	FALSE	FALSE
SIDV3-Region_chr1:10634917-10634937	pool1	chr1	10634917	10634937	4.719	0.465	0.355	0.40007	FALSE	FALSE
SIDV3-Region_chr1:10634999-10635019	pool1	chr1	10634999	10635019	3.842	0.634	0.238	0.749336	FALSE	FALSE
SIDV3-Region_chr1:10635279-10635299	pool1	chr1	10635279	10635299	4.001	0.294	0.242	0.730704	FALSE	FALSE
SIDV3-Region_chr1:10635529-10635549	pool1	chr1	10635529	10635549	3.715	-0.027	-0.037	0.979587	FALSE	FALSE
SIDV3-Region_chr1:10635783-10635803	pool1	chr1	10635783	10635803	3.536	-0.073	0.039	0.979684	FALSE	FALSE
SIDV3-Region_chr1:10635907-10635927	pool1	chr1	10635907	10635927	3.64	-0.281	-0.128	0.906167	FALSE	FALSE
SIDV3-Region_chr1:10636006-10636026	pool1	chr1	10636006	10636026	4.922	-0.069	-0.109	0.884788	FALSE	FALSE
SIDV3-Region_chr1:10636232-10636252	pool1	chr1	10636232	10636252	3.226	-0.438	-0.486	0.464582	FALSE	FALSE
SIDV3-Region_chr1:10636317-10636337	pool1	chr1	10636317	10636337	4.143	-0.074	0.022	0.987363	FALSE	FALSE
SIDV3-Region_chr1:10636376-10636396	pool1	chr1	10636376	10636396	4.281	0.335	0.013	0.993141	FALSE	FALSE
SIDV3-Region_chr1:10636488-10636508	pool1	chr1	10636488	10636508	3.87	-0.038	-0.1	0.925978	FALSE	FALSE
SIDV3-Region_chr1:10759238-10759258	pool1	chr1	10759238	10759258	3.093	0.772	0.651	0.29598	FALSE	FALSE
SIDV3-Region_chr1:10759335-10759355	pool1	chr1	10759335	10759355	4.522	0.053	0.001	0.999557	FALSE	FALSE
SIDV3-Region_chr1:10759551-10759571	pool1	chr1	10759551	10759571	3.867	-0.046	0.096	0.92986	FALSE	FALSE
SIDV3-Region_chr1:10759626-10759646	pool1	chr1	10759626	10759646	3.838	0.078	0.243	0.745396	FALSE	FALSE
SIDV3-CAGE_chr1:10796367-10796387	pool1	chr1	10796367	10796387	3.974	-0.092	-0.105	0.922669	FALSE	FALSE
SIDV3-CAGE_chr1:10796429-10796449	pool1	chr1	10796429	10796449	4.264	0.365	0.168	0.830875	FALSE	FALSE
SIDV3-CAGE_chr1:10796536-10796556	pool1	chr1	10796536	10796556	4.589	0.294	0.238	0.669267	FALSE	FALSE
SIDV3-CAGE_chr1:10796707-10796727	pool1	chr1	10796707	10796727	2.063	-0.591	-0.33	0.811974	FALSE	FALSE
SIDV3-Region_chr1:11012248-11012268	pool1	chr1	11012248	11012268	4.791	0.577	0.311	0.503184	FALSE	FALSE
SIDV3-Region_chr1:11012308-11012328	pool1	chr1	11012308	11012328	4.301	-0.147	-0.23	0.739591	FALSE	FALSE
SIDV3-Region_chr1:11012365-11012385	pool1	chr1	11012365	11012385	4.191	0.035	0.026	0.983733	FALSE	FALSE
SIDV3-CAGE_chr1:11012587-11012607	pool1	chr1	11012587	11012607	4.357	0.042	0.03	0.981805	FALSE	FALSE
SIDV3-Region_chr1:11012731-11012751	pool1	chr1	11012731	11012751	3.912	0.056	-0.001	0.999557	FALSE	FALSE
SIDV3-Region_chr1:11012782-11012802	pool1	chr1	11012782	11012802	3.578	0.059	0.257	0.847895	FALSE	FALSE
SIDV3-Region_chr1:11012839-11012859	pool1	chr1	11012839	11012859	4.465	-0.094	-0.422	0.282842	FALSE	FALSE
SIDV3-Region_chr1:11012949-11012969	pool1	chr1	11012949	11012969	3.977	0.495	0.153	0.886824	FALSE	FALSE
SIDV3-Region_chr1:11013003-11013023	pool1	chr1	11013003	11013023	2.971	-0.303	0.029	0.987401	FALSE	FALSE
SIDV3-Region_chr1:11013065-11013085	pool1	chr1	11013065	11013085	4.553	0.115	0.226	0.697069	FALSE	FALSE
SIDV3-Region_chr1:11013135-11013155	pool1	chr1	11013135	11013155	4.546	0.221	0.203	0.787229	FALSE	FALSE
SIDV3-Region_chr1:11013346-11013366	pool1	chr1	11013346	11013366	2.738	-0.54	-0.397	0.665456	FALSE	FALSE
SIDV3-Region_chr1:11013410-11013430	pool1	chr1	11013410	11013430	3.481	-0.146	-0.115	0.922675	FALSE	FALSE
SIDV3-Region_chr1:11054392-11054412	pool1	chr1	11054392	11054412	4.468	0.278	0.06	0.955556	FALSE	FALSE
SIDV3-Region_chr1:11054463-11054483	pool1	chr1	11054463	11054483	4.418	-0.037	-0.154	0.843565	FALSE	FALSE
SIDV3-Region_chr1:11054754-11054774	pool1	chr1	11054754	11054774	3.81	0.228	0.089	0.939642	FALSE	FALSE
SIDV3-CAGE_chr1:11059741-11059761	pool1	chr1	11059741	11059761	3.865	-0.12	-0.109	0.93221	FALSE	FALSE
SIDV3-CAGE_chr1:11059792-11059812	pool1	chr1	11059792	11059812	3.875	-0.294	-0.343	0.567453	FALSE	FALSE
SIDV3-CAGE_chr1:11059877-11059897	pool1	chr1	11059877	11059897	4	-0.305	-0.144	0.870047	FALSE	FALSE
SIDV3-CAGE_chr1:11059988-11060008	pool1	chr1	11059988	11060008	4.329	0.132	0.165	0.819713	FALSE	FALSE
SIDV3-CAGE_chr1:11060071-11060091	pool1	chr1	11060071	11060091	2.65	0.01	-0.159	0.920731	FALSE	FALSE
SIDV3-Region_chr1:11241680-11241700	pool1	chr1	11241680	11241700	3.214	0.425	0.314	0.737295	FALSE	FALSE
SIDV3-Region_chr1:11241864-11241884	pool1	chr1	11241864	11241884	4.356	0.27	0.159	0.846774	FALSE	FALSE
SIDV3-Region_chr1:11241995-11242015	pool1	chr1	11241995	11242015	3.953	-0.039	0.025	0.985208	FALSE	FALSE
SIDV3-Region_chr1:11248088-11248108	pool1	chr1	11248088	11248108	1.106	-0.319	0.076	0.975588	FALSE	FALSE
SIDV3-Region_chr1:11248412-11248432	pool1	chr1	11248412	11248432	4.381	-0.031	-0.074	0.939983	FALSE	FALSE
SIDV3-Region_chr1:11248508-11248528	pool1	chr1	11248508	11248528	2.218	0.276	0.371	0.77972	FALSE	FALSE
SIDV3-CAGE_chr1:11262259-11262279	pool1	chr1	11262259	11262279	3.099	0.373	0.378	0.682412	FALSE	FALSE
SIDV3-CAGE_chr1:11262335-11262355	pool1	chr1	11262335	11262355	3.984	-0.007	0.198	0.809451	FALSE	FALSE
SIDV3-Region_chr1:11262428-11262448	pool1	chr1	11262428	11262448	3.233	-0.866	-0.815	0.141117	FALSE	FALSE
SIDV3-CAGE_chr1:11262475-11262495	pool1	chr1	11262475	11262495	2.849	-1.988	-1.504	0.000158169	TRUE	FALSE
SIDV3-Region_chr1:11262529-11262549	pool1	chr1	11262529	11262549	3.406	-1.565	-1.615	1.46944e-08	TRUE	FALSE
SIDV3-Region_chr1:11262650-11262670	pool1	chr1	11262650	11262670	3.953	0.532	0.706	0.0278678	FALSE	TRUE
SIDV3-Region_chr1:11262843-11262863	pool1	chr1	11262843	11262863	3.309	-2.11	-1.747	7.19522e-09	TRUE	FALSE
SIDV3-Region_chr1:11272810-11272830	pool1	chr1	11272810	11272830	3.2	-0.234	0.149	0.917062	FALSE	FALSE
SIDV3-Region_chr1:11272930-11272950	pool1	chr1	11272930	11272950	4.26	-0.378	-0.255	0.711807	FALSE	FALSE
SIDV3-Region_chr1:11273078-11273098	pool1	chr1	11273078	11273098	3.446	0.219	0.084	0.95616	FALSE	FALSE
SIDV3-Region_chr1:11273165-11273185	pool1	chr1	11273165	11273185	4.358	0.155	0.202	0.801536	FALSE	FALSE
SIDV3-CAGE_chr1:11273277-11273297	pool1	chr1	11273277	11273297	3.547	0.11	0.181	0.851538	FALSE	FALSE
SIDV3-CAGE_chr1:11273346-11273366	pool1	chr1	11273346	11273366	4.93	0.149	0.048	0.966858	FALSE	FALSE
SIDV3-CAGE_chr1:11273406-11273426	pool1	chr1	11273406	11273426	4.322	-0.337	-0.219	0.736019	FALSE	FALSE
SIDV3-CAGE_chr1:11273463-11273483	pool1	chr1	11273463	11273483	4.92	0.104	0.138	0.837624	FALSE	FALSE
SIDV3-Region_chr1:11295891-11295911	pool1	chr1	11295891	11295911	0.464	-1.935	-2.023	0.000438514	TRUE	FALSE
SIDV3-Region_chr1:11296028-11296048	pool1	chr1	11296028	11296048	4.139	0.105	-0.132	0.891435	FALSE	FALSE
SIDV3-Region_chr1:11296089-11296109	pool1	chr1	11296089	11296109	4.847	0.067	-0.006	0.99529	FALSE	FALSE
SIDV3-Region_chr1:11296197-11296217	pool1	chr1	11296197	11296217	2.78	0.326	0.706	0.481903	FALSE	FALSE
SIDV3-Region_chr1:11296292-11296312	pool1	chr1	11296292	11296312	4.421	0.039	0.307	0.559679	FALSE	FALSE
SIDV3-Region_chr1:11664098-11664118	pool1	chr1	11664098	11664118	4.817	0.906	1.044	4.42064e-08	FALSE	TRUE
SIDV3-CAGE_chr1:11664124-11664144	pool1	chr1	11664124	11664144	4	0.057	0.401	0.567981	FALSE	FALSE
SIDV3-Region_chr1:11664174-11664194	pool1	chr1	11664174	11664194	4.244	0.094	0.066	0.953238	FALSE	FALSE
SIDV3-Region_chr1:11664243-11664263	pool1	chr1	11664243	11664263	3.838	-0.296	-0.017	0.990769	FALSE	FALSE
SIDV3-Region_chr1:11664328-11664348	pool1	chr1	11664328	11664348	4.119	-0.267	-0.04	0.976445	FALSE	FALSE
SIDV3-Region_chr1:11664475-11664495	pool1	chr1	11664475	11664495	3.82	-0.206	-0.124	0.910757	FALSE	FALSE
SIDV3-Region_chr1:11664541-11664561	pool1	chr1	11664541	11664561	4.035	0.282	0.33	0.588938	FALSE	FALSE
SIDV3-Region_chr1:11664606-11664626	pool1	chr1	11664606	11664626	4.21	0.047	-0.048	0.969832	FALSE	FALSE
SIDV3-Region_chr1:11664671-11664691	pool1	chr1	11664671	11664691	3.116	-0.026	0.066	0.968256	FALSE	FALSE
SIDV3-Region_chr1:11664780-11664800	pool1	chr1	11664780	11664800	3.795	-0.545	-0.251	0.741288	FALSE	FALSE
SIDV3-Region_chr1:11664867-11664887	pool1	chr1	11664867	11664887	4.141	0.37	0.187	0.80279	FALSE	FALSE
SIDV3-Region_chr1:11664929-11664949	pool1	chr1	11664929	11664949	4.085	0.227	-0.014	0.991984	FALSE	FALSE
SIDV3-Region_chr1:11701567-11701587	pool1	chr1	11701567	11701587	3.777	0.322	0.342	0.63513	FALSE	FALSE
SIDV3-Region_chr1:11701693-11701713	pool1	chr1	11701693	11701713	3.661	-0.13	-0.146	0.891443	FALSE	FALSE
SIDV3-Region_chr1:11701838-11701858	pool1	chr1	11701838	11701858	4.561	-0.284	-0.144	0.850048	FALSE	FALSE
SIDV3-Region_chr1:11714870-11714890	pool1	chr1	11714870	11714890	4.113	-0.286	-0.179	0.821473	FALSE	FALSE
SIDV3-Region_chr1:11714971-11714991	pool1	chr1	11714971	11714991	4.539	0.442	0.349	0.437468	FALSE	FALSE
SIDV3-Region_chr1:11715026-11715046	pool1	chr1	11715026	11715046	3.274	-0.031	-0.1	0.94024	FALSE	FALSE
SIDV3-Region_chr1:11715115-11715135	pool1	chr1	11715115	11715135	3.394	-0.613	-0.408	0.684526	FALSE	FALSE
SIDV3-Region_chr1:11715211-11715231	pool1	chr1	11715211	11715231	3.936	0.593	0.354	0.564522	FALSE	FALSE
SIDV3-Region_chr1:11908252-11908272	pool1	chr1	11908252	11908272	3.503	-0.053	0.178	0.866612	FALSE	FALSE
SIDV3-Region_chr1:11908473-11908493	pool1	chr1	11908473	11908493	3.126	0.076	-0.025	0.989243	FALSE	FALSE
SIDV3-Region_chr1:11908663-11908683	pool1	chr1	11908663	11908683	3.515	0.005	0.273	0.762251	FALSE	FALSE
SIDV3-Region_chr1:11908793-11908813	pool1	chr1	11908793	11908813	3.354	-0.068	-0.13	0.914603	FALSE	FALSE
SIDV3-Region_chr1:11908850-11908870	pool1	chr1	11908850	11908870	3.757	-0.036	-0.102	0.929753	FALSE	FALSE
SIDV3-Region_chr1:11908910-11908930	pool1	chr1	11908910	11908930	3.353	-0.537	-0.502	0.546853	FALSE	FALSE
SIDV3-Region_chr1:11909013-11909033	pool1	chr1	11909013	11909033	4.69	0.297	0.116	0.876719	FALSE	FALSE
SIDV3-Region_chr1:11909110-11909130	pool1	chr1	11909110	11909130	3.222	0.299	0.144	0.905948	FALSE	FALSE
SIDV3-Region_chr1:11909582-11909602	pool1	chr1	11909582	11909602	4.046	-0.251	-0.136	0.890232	FALSE	FALSE
SIDV3-Region_chr1:11909765-11909785	pool1	chr1	11909765	11909785	3.741	-0.396	-0.223	0.795436	FALSE	FALSE
SIDV3-CAGE_chr1:11934619-11934639	pool1	chr1	11934619	11934639	3.693	-0.042	0.114	0.914897	FALSE	FALSE
SIDV3-Region_chr1:11934676-11934696	pool1	chr1	11934676	11934696	4.053	-0.025	0.029	0.981805	FALSE	FALSE
SIDV3-CAGE_chr1:11934715-11934735	pool1	chr1	11934715	11934735	3.24	-0.351	-0.388	0.64289	FALSE	FALSE
SIDV3-Region_chr1:11934814-11934834	pool1	chr1	11934814	11934834	4.24	-0.213	-0.187	0.795626	FALSE	FALSE
SIDV3-Region_chr1:11934875-11934895	pool1	chr1	11934875	11934895	4.116	0.812	0.697	0.0202742	FALSE	TRUE
SIDV3-Region_chr1:11934974-11934994	pool1	chr1	11934974	11934994	2.478	-1.202	-0.599	0.659364	FALSE	FALSE
SIDV3-CAGE_chr1:12019457-12019477	pool1	chr1	12019457	12019477	4.091	0.165	0.108	0.91017	FALSE	FALSE
SIDV3-CAGE_chr1:12019519-12019539	pool1	chr1	12019519	12019539	3.945	-0.301	-0.25	0.730067	FALSE	FALSE
SIDV3-CAGE_chr1:12019577-12019597	pool1	chr1	12019577	12019597	4.18	0.076	-0.172	0.824168	FALSE	FALSE
SIDV3-CAGE_chr1:12019635-12019655	pool1	chr1	12019635	12019655	3.402	-0.005	0.097	0.942354	FALSE	FALSE
SIDV3-CAGE_chr1:12019726-12019746	pool1	chr1	12019726	12019746	3.751	-0.015	0.024	0.986792	FALSE	FALSE
SIDV3-Region_chr1:12031336-12031356	pool1	chr1	12031336	12031356	3.592	-0.272	0.009	0.996601	FALSE	FALSE
SIDV3-Region_chr1:12031410-12031430	pool1	chr1	12031410	12031430	4.223	0.501	0.139	0.878012	FALSE	FALSE
SIDV3-Region_chr1:12031558-12031578	pool1	chr1	12031558	12031578	4.205	-0.381	-0.408	0.371048	FALSE	FALSE
SIDV3-Region_chr1:12031625-12031645	pool1	chr1	12031625	12031645	3.99	0.255	0.282	0.674521	FALSE	FALSE
SIDV3-Region_chr1:12051849-12051869	pool1	chr1	12051849	12051869	4.123	0.311	0.242	0.714646	FALSE	FALSE
SIDV3-Region_chr1:12051964-12051984	pool1	chr1	12051964	12051984	3.795	-0.256	-0.114	0.913749	FALSE	FALSE
SIDV3-Region_chr1:12052138-12052158	pool1	chr1	12052138	12052158	3.812	-0.211	-0.075	0.951696	FALSE	FALSE
SIDV3-Region_chr1:12052994-12053014	pool1	chr1	12052994	12053014	3.516	-0.213	-0.14	0.909436	FALSE	FALSE
SIDV3-Region_chr1:12053131-12053151	pool1	chr1	12053131	12053151	1.292	-0.803	-0.222	0.925091	FALSE	FALSE
SIDV3-Region_chr1:12053201-12053221	pool1	chr1	12053201	12053221	3.907	-0.135	-0.104	0.923539	FALSE	FALSE
SIDV3-Region_chr1:12059690-12059710	pool1	chr1	12059690	12059710	3.485	-0.423	-0.617	0.190097	FALSE	FALSE
SIDV3-Region_chr1:12059810-12059830	pool1	chr1	12059810	12059830	3.613	-0.071	-0.019	0.990671	FALSE	FALSE
SIDV3-Region_chr1:12059959-12059979	pool1	chr1	12059959	12059979	3.659	-0.075	-0.254	0.759258	FALSE	FALSE
SIDV3-Region_chr1:12063370-12063390	pool1	chr1	12063370	12063390	2.538	-0.147	0.021	0.992583	FALSE	FALSE
SIDV3-Region_chr1:12063480-12063500	pool1	chr1	12063480	12063500	3.341	-0.176	-0.29	0.75575	FALSE	FALSE
SIDV3-Region_chr1:12063566-12063586	pool1	chr1	12063566	12063586	3.195	-0.287	-0.082	0.959414	FALSE	FALSE
SIDV3-Region_chr1:12063653-12063673	pool1	chr1	12063653	12063673	4.661	0.11	-0.059	0.955014	FALSE	FALSE
SIDV3-Region_chr1:12063715-12063735	pool1	chr1	12063715	12063735	3.713	0.09	0.028	0.983761	FALSE	FALSE
SIDV3-Region_chr1:12064536-12064556	pool1	chr1	12064536	12064556	3.875	0.409	0.12	0.910648	FALSE	FALSE
SIDV3-Region_chr1:12064609-12064629	pool1	chr1	12064609	12064629	3.074	0.087	0.229	0.832571	FALSE	FALSE
SIDV3-Region_chr1:12064802-12064822	pool1	chr1	12064802	12064822	3.931	0.013	-0.021	0.989243	FALSE	FALSE
SIDV3-Region_chr1:12064963-12064983	pool1	chr1	12064963	12064983	3.026	0.039	-0.175	0.892163	FALSE	FALSE
SIDV3-Region_chr1:12079530-12079550	pool1	chr1	12079530	12079550	3.387	-0.009	0.192	0.855157	FALSE	FALSE
SIDV3-Region_chr1:12079633-12079653	pool1	chr1	12079633	12079653	4.301	0.28	0.614	0.0432688	FALSE	TRUE
SIDV3-Region_chr1:12079770-12079790	pool1	chr1	12079770	12079790	3.93	-0.083	-0.089	0.938082	FALSE	FALSE
SIDV3-Region_chr1:12079822-12079842	pool1	chr1	12079822	12079842	3.952	0.509	0.309	0.605913	FALSE	FALSE
SIDV3-Region_chr1:12167023-12167043	pool1	chr1	12167023	12167043	3.97	-0.248	-0.224	0.757954	FALSE	FALSE
SIDV3-Region_chr1:12167081-12167101	pool1	chr1	12167081	12167101	3.753	-0.267	-0.165	0.859123	FALSE	FALSE
SIDV3-Region_chr1:12167235-12167255	pool1	chr1	12167235	12167255	4.435	0.006	0.125	0.88293	FALSE	FALSE
SIDV3-Region_chr1:12167303-12167323	pool1	chr1	12167303	12167323	4.286	0.295	0.377	0.49387	FALSE	FALSE
SIDV3-Region_chr1:12167356-12167376	pool1	chr1	12167356	12167376	4.43	0.158	0.083	0.949732	FALSE	FALSE
SIDV3-Region_chr1:12167441-12167461	pool1	chr1	12167441	12167461	4.31	0.466	0.3	0.588868	FALSE	FALSE
SIDV3-Region_chr1:12167601-12167621	pool1	chr1	12167601	12167621	3.765	-0.245	-0.064	0.960612	FALSE	FALSE
SIDV3-Region_chr1:12167699-12167719	pool1	chr1	12167699	12167719	3.471	-0.111	-0.026	0.986539	FALSE	FALSE
SIDV3-Region_chr1:12167757-12167777	pool1	chr1	12167757	12167777	3.831	-0.488	-0.224	0.776661	FALSE	FALSE
SIDV3-Region_chr1:12167930-12167950	pool1	chr1	12167930	12167950	4.136	-0.563	-0.386	0.440611	FALSE	FALSE
SIDV3-Region_chr1:12168033-12168053	pool1	chr1	12168033	12168053	2.519	-0.257	-0.073	0.969724	FALSE	FALSE
SIDV3-Region_chr1:12168113-12168133	pool1	chr1	12168113	12168133	2.816	-0.124	-0.17	0.90251	FALSE	FALSE
SIDV3-Region_chr1:12168209-12168229	pool1	chr1	12168209	12168229	3.556	0.197	0.063	0.965416	FALSE	FALSE
SIDV3-Region_chr1:12168297-12168317	pool1	chr1	12168297	12168317	3.408	0.175	0.208	0.827178	FALSE	FALSE
SIDV3-Region_chr1:12168366-12168386	pool1	chr1	12168366	12168386	3.511	-0.242	-0.013	0.993802	FALSE	FALSE
SIDV3-Region_chr1:12168498-12168518	pool1	chr1	12168498	12168518	4.039	0.038	0.243	0.749336	FALSE	FALSE
SIDV3-Region_chr1:12168551-12168571	pool1	chr1	12168551	12168571	4.4	-0.389	-0.436	0.24554	FALSE	FALSE
SIDV3-Region_chr1:12168704-12168724	pool1	chr1	12168704	12168724	4.197	0.161	0.231	0.74563	FALSE	FALSE
SIDV3-Region_chr1:12168759-12168779	pool1	chr1	12168759	12168779	3.559	0.112	0.167	0.870047	FALSE	FALSE
SIDV3-Region_chr1:12168877-12168897	pool1	chr1	12168877	12168897	4.04	0.023	0.044	0.973466	FALSE	FALSE
SIDV3-Region_chr1:12168952-12168972	pool1	chr1	12168952	12168972	4.124	-0.159	-0.105	0.913774	FALSE	FALSE
SIDV3-Region_chr1:12169117-12169137	pool1	chr1	12169117	12169137	4.378	-0.066	-0.242	0.703392	FALSE	FALSE
SIDV3-Region_chr1:12169276-12169296	pool1	chr1	12169276	12169296	4.102	-0.077	0.057	0.963529	FALSE	FALSE
SIDV3-Region_chr1:12169373-12169393	pool1	chr1	12169373	12169393	3.764	0.111	-0.15	0.876719	FALSE	FALSE
SIDV3-Region_chr1:12170407-12170427	pool1	chr1	12170407	12170427	3.896	0.048	-0.022	0.987401	FALSE	FALSE
SIDV3-Region_chr1:12170511-12170531	pool1	chr1	12170511	12170531	4.13	0.298	0.224	0.754348	FALSE	FALSE
SIDV3-Region_chr1:12170579-12170599	pool1	chr1	12170579	12170599	4.193	-0.188	0.189	0.806083	FALSE	FALSE
SIDV3-Region_chr1:12172060-12172080	pool1	chr1	12172060	12172080	4.046	-0.355	-0.181	0.841684	FALSE	FALSE
SIDV3-Region_chr1:12172176-12172196	pool1	chr1	12172176	12172196	3.906	0.034	-0.15	0.873507	FALSE	FALSE
SIDV3-Region_chr1:12172276-12172296	pool1	chr1	12172276	12172296	3.592	-0.091	-0.2	0.846955	FALSE	FALSE
SIDV3-Region_chr1:12172337-12172357	pool1	chr1	12172337	12172357	2.607	-0.4	-0.319	0.813746	FALSE	FALSE
SIDV3-Region_chr1:12172390-12172410	pool1	chr1	12172390	12172410	3.443	-0.501	0.103	0.939365	FALSE	FALSE
SIDV3-Region_chr1:12173640-12173660	pool1	chr1	12173640	12173660	3.395	0.071	0.245	0.811304	FALSE	FALSE
SIDV3-Region_chr1:12173776-12173796	pool1	chr1	12173776	12173796	4.117	0.129	0.111	0.906092	FALSE	FALSE
SIDV3-Region_chr1:12173852-12173872	pool1	chr1	12173852	12173872	4.397	-0.122	-0.199	0.791454	FALSE	FALSE
SIDV3-Region_chr1:12173904-12173924	pool1	chr1	12173904	12173924	3.919	-0.156	-0.063	0.958716	FALSE	FALSE
SIDV3-Region_chr1:12174023-12174043	pool1	chr1	12174023	12174043	3.819	-1.281	-1.043	0.00188505	TRUE	FALSE
SIDV3-Region_chr1:12174875-12174895	pool1	chr1	12174875	12174895	4.639	0.087	0.044	0.967308	FALSE	FALSE
SIDV3-Region_chr1:12174980-12175000	pool1	chr1	12174980	12175000	3.961	-0.343	-0.247	0.717811	FALSE	FALSE
SIDV3-Region_chr1:12175033-12175053	pool1	chr1	12175033	12175053	3.168	0.116	0.07	0.969223	FALSE	FALSE
SIDV3-Region_chr1:12175302-12175322	pool1	chr1	12175302	12175322	3.764	0.041	-0.024	0.98693	FALSE	FALSE
SIDV3-Region_chr1:12175414-12175434	pool1	chr1	12175414	12175434	4.917	0.176	0.162	0.799967	FALSE	FALSE
SIDV3-Region_chr1:12175470-12175490	pool1	chr1	12175470	12175490	4.22	0.257	-0.042	0.974555	FALSE	FALSE
SIDV3-Region_chr1:12229890-12229910	pool1	chr1	12229890	12229910	4.171	-0.074	-0.412	0.478123	FALSE	FALSE
SIDV3-CAGE_chr1:12229957-12229977	pool1	chr1	12229957	12229977	4.235	0.414	0.202	0.799245	FALSE	FALSE
SIDV3-Region_chr1:12229992-12230012	pool1	chr1	12229992	12230012	3.952	-0.722	-0.286	0.696186	FALSE	FALSE
SIDV3-Region_chr1:12230067-12230087	pool1	chr1	12230067	12230087	1.433	0.28	0.406	0.771234	FALSE	FALSE
SIDV3-Region_chr1:12230159-12230179	pool1	chr1	12230159	12230179	3.874	0.019	0.08	0.949778	FALSE	FALSE
SIDV3-CAGE_chr1:12230240-12230260	pool1	chr1	12230240	12230260	3.636	-0.11	0.025	0.988156	FALSE	FALSE
SIDV3-Region_chr1:12244079-12244099	pool1	chr1	12244079	12244099	2.551	0.253	0.367	0.74054	FALSE	FALSE
SIDV3-Region_chr1:12244267-12244287	pool1	chr1	12244267	12244287	2.249	-0.492	-0.155	0.928657	FALSE	FALSE
SIDV3-Region_chr1:12244324-12244344	pool1	chr1	12244324	12244344	3.073	-0.31	-0.232	0.828379	FALSE	FALSE
SIDV3-Region_chr1:12597791-12597811	pool1	chr1	12597791	12597811	3.641	-0.235	-0.33	0.624073	FALSE	FALSE
SIDV3-Region_chr1:12597921-12597941	pool1	chr1	12597921	12597941	3.911	-0.34	-0.014	0.992217	FALSE	FALSE
SIDV3-Region_chr1:12597973-12597993	pool1	chr1	12597973	12597993	3.858	0.043	-0.025	0.987849	FALSE	FALSE
SIDV3-Region_chr1:12659070-12659090	pool1	chr1	12659070	12659090	4.217	-0.347	-0.078	0.941961	FALSE	FALSE
SIDV3-Region_chr1:12659125-12659145	pool1	chr1	12659125	12659145	3.042	-0.841	-0.311	0.737295	FALSE	FALSE
SIDV3-Region_chr1:12659277-12659297	pool1	chr1	12659277	12659297	3.24	-0.052	-0.245	0.802346	FALSE	FALSE
SIDV3-Region_chr1:12659365-12659385	pool1	chr1	12659365	12659385	4.031	0.458	0.552	0.139166	FALSE	FALSE
SIDV3-Region_chr1:13451545-13451565	pool1	chr1	13451545	13451565	3.931	-0.385	-0.368	0.581216	FALSE	FALSE
SIDV3-Region_chr1:13451663-13451683	pool1	chr1	13451663	13451683	2.578	-0.194	-0.271	0.820248	FALSE	FALSE
SIDV3-Region_chr1:13451765-13451785	pool1	chr1	13451765	13451785	1.918	-0.413	-0.249	0.874921	FALSE	FALSE
SIDV3-Region_chr1:13451831-13451851	pool1	chr1	13451831	13451851	3.224	-0.075	0.139	0.911255	FALSE	FALSE
SIDV3-Region_chr1:13469491-13469511	pool1	chr1	13469491	13469511	4.227	-0.181	-0.046	0.968366	FALSE	FALSE
SIDV3-Region_chr1:13469600-13469620	pool1	chr1	13469600	13469620	4.49	0.131	0.014	0.991431	FALSE	FALSE
SIDV3-Region_chr1:13469652-13469672	pool1	chr1	13469652	13469672	4.339	-0.176	-0.085	0.933005	FALSE	FALSE
SIDV3-CAGE_chr1:13749350-13749370	pool1	chr1	13749350	13749370	4.479	-0.027	0.035	0.977411	FALSE	FALSE
SIDV3-CAGE_chr1:13749442-13749462	pool1	chr1	13749442	13749462	4.071	0.151	0.034	0.980169	FALSE	FALSE
SIDV3-CAGE_chr1:13749518-13749538	pool1	chr1	13749518	13749538	4.095	-0.024	-0.349	0.539535	FALSE	FALSE
SIDV3-CAGE_chr1:13749609-13749629	pool1	chr1	13749609	13749629	4.179	-0.095	-0.072	0.952374	FALSE	FALSE
SIDV3-CAGE_chr1:13749662-13749682	pool1	chr1	13749662	13749682	3.636	0.156	0.211	0.857237	FALSE	FALSE
SIDV3-Region_chr1:13765070-13765090	pool1	chr1	13765070	13765090	4.467	0.234	0.337	0.576175	FALSE	FALSE
SIDV3-Region_chr1:13765131-13765151	pool1	chr1	13765131	13765151	3.862	-0.059	-0.311	0.632992	FALSE	FALSE
SIDV3-Region_chr1:13765353-13765373	pool1	chr1	13765353	13765373	2.676	-0.044	-0.266	0.818192	FALSE	FALSE
SIDV3-Region_chr1:13793238-13793258	pool1	chr1	13793238	13793258	4.25	0.104	0.178	0.806932	FALSE	FALSE
SIDV3-Region_chr1:13793344-13793364	pool1	chr1	13793344	13793364	3.258	0.006	0.224	0.834213	FALSE	FALSE
SIDV3-Region_chr1:13793405-13793425	pool1	chr1	13793405	13793425	3.253	-0.538	-0.201	0.869482	FALSE	FALSE
SIDV3-Region_chr1:13795463-13795483	pool1	chr1	13795463	13795483	4.195	0.231	0.359	0.481723	FALSE	FALSE
SIDV3-Region_chr1:13795609-13795629	pool1	chr1	13795609	13795629	2.859	-0.171	-0.263	0.809813	FALSE	FALSE
SIDV3-Region_chr1:13795692-13795712	pool1	chr1	13795692	13795712	4.189	0.153	-0.188	0.810519	FALSE	FALSE
SIDV3-Region_chr1:13800895-13800915	pool1	chr1	13800895	13800915	3.569	-0.401	-0.179	0.858283	FALSE	FALSE
SIDV3-Region_chr1:13801061-13801081	pool1	chr1	13801061	13801081	3.758	0.021	-0.166	0.868708	FALSE	FALSE
SIDV3-Region_chr1:13801132-13801152	pool1	chr1	13801132	13801152	3.46	-0.434	-0.352	0.611282	FALSE	FALSE
SIDV3-Region_chr1:13801227-13801247	pool1	chr1	13801227	13801247	3.688	0.127	-0.094	0.932955	FALSE	FALSE
SIDV3-Region_chr1:13801835-13801855	pool1	chr1	13801835	13801855	3.952	0.11	0.327	0.571305	FALSE	FALSE
SIDV3-Region_chr1:13801981-13802001	pool1	chr1	13801981	13802001	4.517	-0.157	-0.084	0.946538	FALSE	FALSE
SIDV3-Region_chr1:13802046-13802066	pool1	chr1	13802046	13802066	4.221	0.237	0.164	0.849222	FALSE	FALSE
SIDV3-Region_chr1:13807385-13807405	pool1	chr1	13807385	13807405	4.383	-0.077	-0.134	0.884084	FALSE	FALSE
SIDV3-Region_chr1:13807480-13807500	pool1	chr1	13807480	13807500	2.602	-0.522	-0.129	0.934287	FALSE	FALSE
SIDV3-Region_chr1:13807596-13807616	pool1	chr1	13807596	13807616	4.59	0.371	0.218	0.707027	FALSE	FALSE
SIDV3-Region_chr1:13807842-13807862	pool1	chr1	13807842	13807862	4.472	0.248	0.025	0.981842	FALSE	FALSE
SIDV3-Region_chr1:13808691-13808711	pool1	chr1	13808691	13808711	3.299	-0.141	0.075	0.966842	FALSE	FALSE
SIDV3-Region_chr1:13808769-13808789	pool1	chr1	13808769	13808789	4.04	0.132	-0.012	0.993874	FALSE	FALSE
SIDV3-Region_chr1:13808858-13808878	pool1	chr1	13808858	13808878	4.095	0.421	0.465	0.265976	FALSE	FALSE
SIDV3-Region_chr1:13809041-13809061	pool1	chr1	13809041	13809061	3.261	-0.224	-0.154	0.92488	FALSE	FALSE
SIDV3-Region_chr1:13811286-13811306	pool1	chr1	13811286	13811306	3.867	-0.059	0.011	0.993916	FALSE	FALSE
SIDV3-Region_chr1:13811337-13811357	pool1	chr1	13811337	13811357	4.194	-0.055	-0.094	0.931862	FALSE	FALSE
SIDV3-Region_chr1:13811421-13811441	pool1	chr1	13811421	13811441	4.234	0.204	0.387	0.53756	FALSE	FALSE
SIDV3-Region_chr1:13811579-13811599	pool1	chr1	13811579	13811599	2.833	0.533	0.568	0.479687	FALSE	FALSE
SIDV3-Region_chr1:13813682-13813702	pool1	chr1	13813682	13813702	4.139	0.024	0.104	0.911332	FALSE	FALSE
SIDV3-Region_chr1:13813736-13813756	pool1	chr1	13813736	13813756	3.407	0.347	0.628	0.176839	FALSE	FALSE
SIDV3-Region_chr1:13813806-13813826	pool1	chr1	13813806	13813826	4.172	-0.003	-0.061	0.956973	FALSE	FALSE
SIDV3-Region_chr1:13825063-13825083	pool1	chr1	13825063	13825083	3.858	-0.093	-0.05	0.969731	FALSE	FALSE
SIDV3-Region_chr1:13825168-13825188	pool1	chr1	13825168	13825188	4.562	0.328	0.176	0.809446	FALSE	FALSE
SIDV3-Region_chr1:13825222-13825242	pool1	chr1	13825222	13825242	3.09	0.045	0.111	0.937133	FALSE	FALSE
SIDV3-Region_chr1:13828877-13828897	pool1	chr1	13828877	13828897	4.102	-0.17	-0.075	0.943713	FALSE	FALSE
SIDV3-Region_chr1:13828952-13828972	pool1	chr1	13828952	13828972	3.544	-0.627	-0.289	0.706287	FALSE	FALSE
SIDV3-Region_chr1:13829027-13829047	pool1	chr1	13829027	13829047	3.737	-0.588	-0.239	0.800283	FALSE	FALSE
SIDV3-Region_chr1:13829079-13829099	pool1	chr1	13829079	13829099	4.854	0.239	0.173	0.779945	FALSE	FALSE
SIDV3-Region_chr1:14571852-14571872	pool1	chr1	14571852	14571872	3.489	-0.393	-0.569	0.262821	FALSE	FALSE
SIDV3-Region_chr1:14571905-14571925	pool1	chr1	14571905	14571925	3.362	0.044	0.133	0.910512	FALSE	FALSE
SIDV3-Region_chr1:14571984-14572004	pool1	chr1	14571984	14572004	4.309	0.254	0.289	0.592398	FALSE	FALSE
SIDV3-Region_chr1:14572039-14572059	pool1	chr1	14572039	14572059	4.043	0.443	0.462	0.398525	FALSE	FALSE
SIDV3-Region_chr1:14572215-14572235	pool1	chr1	14572215	14572235	2.791	-0.095	-0.214	0.865096	FALSE	FALSE
SIDV3-Region_chr1:14598869-14598889	pool1	chr1	14598869	14598889	3.894	0.066	-0.12	0.906613	FALSE	FALSE
SIDV3-Region_chr1:14598933-14598953	pool1	chr1	14598933	14598953	4.051	0.098	0.031	0.98164	FALSE	FALSE
SIDV3-Region_chr1:14599017-14599037	pool1	chr1	14599017	14599037	3.965	-0.12	-0.103	0.925109	FALSE	FALSE
SIDV3-Region_chr1:14599068-14599088	pool1	chr1	14599068	14599088	4.383	-0.278	0.029	0.980169	FALSE	FALSE
SIDV3-Region_chr1:14599146-14599166	pool1	chr1	14599146	14599166	3.12	-0.63	-0.545	0.374132	FALSE	FALSE
SIDV3-Region_chr1:14599206-14599226	pool1	chr1	14599206	14599226	4.293	-0.047	0.185	0.790938	FALSE	FALSE
SIDV3-Region_chr1:14599305-14599325	pool1	chr1	14599305	14599325	4.29	0.099	0.236	0.743216	FALSE	FALSE
SIDV3-Region_chr1:14599413-14599433	pool1	chr1	14599413	14599433	4.493	-0.553	-0.278	0.589085	FALSE	FALSE
SIDV3-Region_chr1:14599464-14599484	pool1	chr1	14599464	14599484	3.529	-0.025	0.07	0.958961	FALSE	FALSE
SIDV3-Region_chr1:14599531-14599551	pool1	chr1	14599531	14599551	3.54	-0.026	0.113	0.935874	FALSE	FALSE
SIDV3-Region_chr1:14627182-14627202	pool1	chr1	14627182	14627202	3.756	-0.142	-0.207	0.807524	FALSE	FALSE
SIDV3-Region_chr1:14627343-14627363	pool1	chr1	14627343	14627363	3.702	-0.476	-0.401	0.50338	FALSE	FALSE
SIDV3-Region_chr1:14627447-14627467	pool1	chr1	14627447	14627467	3.898	0.158	0.123	0.90341	FALSE	FALSE
SIDV3-Region_chr1:14627517-14627537	pool1	chr1	14627517	14627537	2.653	0.053	0.082	0.971744	FALSE	FALSE
SIDV3-CAGE_chr1:14924080-14924100	pool1	chr1	14924080	14924100	4.556	0.307	0.163	0.817691	FALSE	FALSE
SIDV3-CAGE_chr1:14924189-14924209	pool1	chr1	14924189	14924209	3.738	-0.008	0.083	0.953427	FALSE	FALSE
SIDV3-CAGE_chr1:14924257-14924277	pool1	chr1	14924257	14924277	3.282	-0.157	-0.145	0.910487	FALSE	FALSE
SIDV3-CAGE_chr1:14924352-14924372	pool1	chr1	14924352	14924372	4.344	0.253	0.136	0.864156	FALSE	FALSE
SIDV3-Region_chr1:14999369-14999389	pool1	chr1	14999369	14999389	3.049	0.017	-0.016	0.993107	FALSE	FALSE
SIDV3-Region_chr1:14999462-14999482	pool1	chr1	14999462	14999482	4.489	-0.311	-0.03	0.980169	FALSE	FALSE
SIDV3-Region_chr1:14999554-14999574	pool1	chr1	14999554	14999574	4.04	0.294	0.084	0.9368	FALSE	FALSE
SIDV3-Region_chr1:14999615-14999635	pool1	chr1	14999615	14999635	5.225	0.481	0.34	0.482685	FALSE	FALSE
SIDV3-Region_chr1:14999671-14999691	pool1	chr1	14999671	14999691	3.215	-0.078	-0.268	0.801595	FALSE	FALSE
SIDV3-Region_chr1:15112263-15112283	pool1	chr1	15112263	15112283	4.279	0.096	0.02	0.987857	FALSE	FALSE
SIDV3-Region_chr1:15112470-15112490	pool1	chr1	15112470	15112490	3.992	0.081	0.177	0.83515	FALSE	FALSE
SIDV3-Region_chr1:15112645-15112665	pool1	chr1	15112645	15112665	4.566	0.366	0.376	0.39732	FALSE	FALSE
SIDV3-Region_chr1:15128570-15128590	pool1	chr1	15128570	15128590	0.308	-0.843	-0.802	0.544129	FALSE	FALSE
SIDV3-Region_chr1:15128631-15128651	pool1	chr1	15128631	15128651	2.78	0.099	-0.013	0.995043	FALSE	FALSE
SIDV3-Region_chr1:15128790-15128810	pool1	chr1	15128790	15128810	2.812	0.696	0.512	0.501406	FALSE	FALSE
SIDV3-Region_chr1:15128902-15128922	pool1	chr1	15128902	15128922	3.37	0.268	0.18	0.864985	FALSE	FALSE
SIDV3-CAGE_chr1:15153655-15153675	pool1	chr1	15153655	15153675	4.24	-0.073	-0.167	0.832156	FALSE	FALSE
SIDV3-CAGE_chr1:15153726-15153746	pool1	chr1	15153726	15153746	4.172	0.241	0.121	0.892445	FALSE	FALSE
SIDV3-CAGE_chr1:15153803-15153823	pool1	chr1	15153803	15153823	4.141	0.005	0.246	0.715218	FALSE	FALSE
SIDV3-CAGE_chr1:15153904-15153924	pool1	chr1	15153904	15153924	3.884	-0.018	0.076	0.951072	FALSE	FALSE
SIDV3-Region_chr1:15153994-15154014	pool1	chr1	15153994	15154014	3.77	-0.1	-0.165	0.856098	FALSE	FALSE
SIDV3-Region_chr1:15154085-15154105	pool1	chr1	15154085	15154105	4.014	0.393	0.489	0.251366	FALSE	FALSE
SIDV3-Region_chr1:15154141-15154161	pool1	chr1	15154141	15154161	3.038	-0.122	-0.225	0.860528	FALSE	FALSE
SIDV3-Region_chr1:15154226-15154246	pool1	chr1	15154226	15154246	4.23	-0.062	0.007	0.995679	FALSE	FALSE
SIDV3-Region_chr1:15154305-15154325	pool1	chr1	15154305	15154325	3.569	-0.156	0.08	0.95068	FALSE	FALSE
SIDV3-Region_chr1:15154426-15154446	pool1	chr1	15154426	15154446	3.637	-0.248	-0.165	0.875497	FALSE	FALSE
SIDV3-Region_chr1:15501473-15501493	pool1	chr1	15501473	15501493	3.385	0.088	0.137	0.91033	FALSE	FALSE
SIDV3-Region_chr1:15501526-15501546	pool1	chr1	15501526	15501546	3.863	-0.287	-0.067	0.959855	FALSE	FALSE
SIDV3-Region_chr1:15501589-15501609	pool1	chr1	15501589	15501609	4.091	-0.043	-0.049	0.971288	FALSE	FALSE
SIDV3-Region_chr1:15507165-15507185	pool1	chr1	15507165	15507185	4.253	-0.309	-0.231	0.725634	FALSE	FALSE
SIDV3-Region_chr1:15507255-15507275	pool1	chr1	15507255	15507275	3.278	0.582	0.217	0.841027	FALSE	FALSE
SIDV3-Region_chr1:15507328-15507348	pool1	chr1	15507328	15507348	4.178	0.011	0.047	0.969224	FALSE	FALSE
SIDV3-Region_chr1:15507420-15507440	pool1	chr1	15507420	15507440	4.188	0.382	0.252	0.712805	FALSE	FALSE
SIDV3-CAGE_chr1:15523945-15523965	pool1	chr1	15523945	15523965	2.579	-0.253	-0.238	0.895229	FALSE	FALSE
SIDV3-CAGE_chr1:15524079-15524099	pool1	chr1	15524079	15524099	4.083	0.275	0.145	0.864614	FALSE	FALSE
SIDV3-CAGE_chr1:15524142-15524162	pool1	chr1	15524142	15524162	4.351	0.359	0.184	0.796925	FALSE	FALSE
SIDV3-CAGE_chr1:15524203-15524223	pool1	chr1	15524203	15524223	3.48	0.058	0.217	0.851814	FALSE	FALSE
SIDV3-CAGE_chr1:15524288-15524308	pool1	chr1	15524288	15524308	4.177	-0.072	-0.093	0.925342	FALSE	FALSE
SIDV3-Region_chr1:15526393-15526413	pool1	chr1	15526393	15526413	2.831	0.361	0.395	0.659364	FALSE	FALSE
SIDV3-Region_chr1:15526519-15526539	pool1	chr1	15526519	15526539	3.258	-0.353	-0.298	0.73896	FALSE	FALSE
SIDV3-Region_chr1:15526591-15526611	pool1	chr1	15526591	15526611	4.205	0.194	-0.109	0.925306	FALSE	FALSE
SIDV3-Region_chr1:15526647-15526667	pool1	chr1	15526647	15526667	3.403	-0.232	-0.222	0.810788	FALSE	FALSE
SIDV3-Region_chr1:15526772-15526792	pool1	chr1	15526772	15526792	3.873	-0.419	-0.021	0.990288	FALSE	FALSE
SIDV3-CAGE_chr1:15526789-15526809	pool1	chr1	15526789	15526809	3.425	0.049	-0.033	0.98199	FALSE	FALSE
SIDV3-CAGE_chr1:15526945-15526965	pool1	chr1	15526945	15526965	2.704	-0.405	0.044	0.981042	FALSE	FALSE
SIDV3-CAGE_chr1:15527012-15527032	pool1	chr1	15527012	15527032	3.526	0.264	0.189	0.849291	FALSE	FALSE
SIDV3-CAGE_chr1:15527093-15527113	pool1	chr1	15527093	15527113	3.651	-0.466	-0.381	0.544943	FALSE	FALSE
SIDV3-CAGE_chr1:15684270-15684290	pool1	chr1	15684270	15684290	4.591	0.168	-0.018	0.987401	FALSE	FALSE
SIDV3-Region_chr1:15684344-15684364	pool1	chr1	15684344	15684364	3.599	-0.046	0.178	0.86101	FALSE	FALSE
SIDV3-Region_chr1:15684425-15684445	pool1	chr1	15684425	15684445	3.668	-0.308	-0.045	0.974508	FALSE	FALSE
SIDV3-Region_chr1:15684481-15684501	pool1	chr1	15684481	15684501	3.814	-0.133	-0.128	0.912882	FALSE	FALSE
SIDV3-Region_chr1:15684545-15684565	pool1	chr1	15684545	15684565	3.985	-0.048	0.046	0.971657	FALSE	FALSE
SIDV3-Region_chr1:15684605-15684625	pool1	chr1	15684605	15684625	2.643	0.21	-0.237	0.856774	FALSE	FALSE
SIDV3-Region_chr1:15684666-15684686	pool1	chr1	15684666	15684686	3.508	-0.553	-0.512	0.326134	FALSE	FALSE
SIDV3-Region_chr1:15684751-15684771	pool1	chr1	15684751	15684771	3.804	-0.364	-0.329	0.591931	FALSE	FALSE
SIDV3-Region_chr1:15684840-15684860	pool1	chr1	15684840	15684860	3.536	0.006	-0.172	0.864985	FALSE	FALSE
SIDV3-Region_chr1:15684959-15684979	pool1	chr1	15684959	15684979	3.663	0.062	0.227	0.787229	FALSE	FALSE
SIDV3-Region_chr1:15685105-15685125	pool1	chr1	15685105	15685125	3.337	0.436	0.082	0.957618	FALSE	FALSE
SIDV3-Region_chr1:15685252-15685272	pool1	chr1	15685252	15685272	3.199	0.063	-0.058	0.971239	FALSE	FALSE
SIDV3-Region_chr1:15731926-15731946	pool1	chr1	15731926	15731946	3.885	0.052	0.122	0.909938	FALSE	FALSE
SIDV3-Region_chr1:15732061-15732081	pool1	chr1	15732061	15732081	4.013	-0.383	-0.133	0.888193	FALSE	FALSE
SIDV3-Region_chr1:15732123-15732143	pool1	chr1	15732123	15732143	3.624	-0.037	-0.005	0.997537	FALSE	FALSE
SIDV3-Region_chr1:15732216-15732236	pool1	chr1	15732216	15732236	4.134	0.259	0.148	0.880709	FALSE	FALSE
SIDV3-Region_chr1:15732335-15732355	pool1	chr1	15732335	15732355	4.399	-0.05	-0.076	0.934756	FALSE	FALSE
SIDV3-Region_chr1:15736372-15736392	pool1	chr1	15736372	15736392	3.735	0.093	-0.087	0.943093	FALSE	FALSE
SIDV3-Region_chr1:15736460-15736480	pool1	chr1	15736460	15736480	3.515	-0.232	-0.481	0.43308	FALSE	FALSE
SIDV3-Region_chr1:15736606-15736626	pool1	chr1	15736606	15736626	4.421	0.083	0.083	0.927402	FALSE	FALSE
SIDV3-Region_chr1:15736704-15736724	pool1	chr1	15736704	15736724	4.505	0.118	-0.19	0.806083	FALSE	FALSE
SIDV3-Region_chr1:15736776-15736796	pool1	chr1	15736776	15736796	4.07	0.162	0.094	0.925979	FALSE	FALSE
SIDV3-Region_chr1:15741469-15741489	pool1	chr1	15741469	15741489	4.17	0.149	0.023	0.985904	FALSE	FALSE
SIDV3-Region_chr1:15741523-15741543	pool1	chr1	15741523	15741543	4.62	0.309	0.39	0.323588	FALSE	FALSE
SIDV3-Region_chr1:15741622-15741642	pool1	chr1	15741622	15741642	4.449	-0.617	-0.378	0.391385	FALSE	FALSE
SIDV3-Region_chr1:15741743-15741763	pool1	chr1	15741743	15741763	3.499	-0.045	0.045	0.979587	FALSE	FALSE
SIDV3-Region_chr1:15744004-15744024	pool1	chr1	15744004	15744024	3.067	-0.491	-0.572	0.499001	FALSE	FALSE
SIDV3-Region_chr1:15744110-15744130	pool1	chr1	15744110	15744130	4.419	-0.104	-0.214	0.771234	FALSE	FALSE
SIDV3-Region_chr1:15744194-15744214	pool1	chr1	15744194	15744214	4.233	-0.341	-0.065	0.953238	FALSE	FALSE
SIDV3-Region_chr1:15744264-15744284	pool1	chr1	15744264	15744284	4.14	0.013	0.198	0.781068	FALSE	FALSE
SIDV3-Region_chr1:15744326-15744346	pool1	chr1	15744326	15744346	3.984	-0.476	-0.361	0.545032	FALSE	FALSE
SIDV3-Region_chr1:15757450-15757470	pool1	chr1	15757450	15757470	4.261	0.567	0.178	0.819555	FALSE	FALSE
SIDV3-Region_chr1:15757508-15757528	pool1	chr1	15757508	15757528	3.886	-0.223	-0.363	0.542829	FALSE	FALSE
SIDV3-Region_chr1:15757680-15757700	pool1	chr1	15757680	15757700	4.897	0.283	0.024	0.981852	FALSE	FALSE
SIDV3-Region_chr1:15757778-15757798	pool1	chr1	15757778	15757798	4.009	0.184	0.224	0.781459	FALSE	FALSE
SIDV3-Region_chr1:15757867-15757887	pool1	chr1	15757867	15757887	3.861	-0.044	0.02	0.990288	FALSE	FALSE
SIDV3-CAGE_chr1:15758703-15758723	pool1	chr1	15758703	15758723	4.262	0.586	0.789	0.00103276	FALSE	TRUE
SIDV3-CAGE_chr1:15758783-15758803	pool1	chr1	15758783	15758803	4.433	0.488	0.28	0.606343	FALSE	FALSE
SIDV3-CAGE_chr1:15758882-15758902	pool1	chr1	15758882	15758902	4.146	0.067	0.062	0.956789	FALSE	FALSE
SIDV3-CAGE_chr1:15758933-15758953	pool1	chr1	15758933	15758953	4.332	0.265	0.112	0.898241	FALSE	FALSE
SIDV3-CAGE_chr1:15759015-15759035	pool1	chr1	15759015	15759035	4.463	0.389	0.013	0.991664	FALSE	FALSE
SIDV3-Region_chr1:15762677-15762697	pool1	chr1	15762677	15762697	4.659	0.115	0.007	0.995043	FALSE	FALSE
SIDV3-Region_chr1:15762790-15762810	pool1	chr1	15762790	15762810	3.598	-0.349	-0.069	0.959743	FALSE	FALSE
SIDV3-Region_chr1:15762842-15762862	pool1	chr1	15762842	15762862	3.782	0.421	0.181	0.853375	FALSE	FALSE
SIDV3-Region_chr1:15792092-15792112	pool1	chr1	15792092	15792112	4.196	-0.606	-0.312	0.569276	FALSE	FALSE
SIDV3-Region_chr1:15792163-15792183	pool1	chr1	15792163	15792183	4.116	0.188	0.252	0.69127	FALSE	FALSE
SIDV3-Region_chr1:15792215-15792235	pool1	chr1	15792215	15792235	3.894	0.268	0.205	0.795137	FALSE	FALSE
SIDV3-Region_chr1:15792306-15792326	pool1	chr1	15792306	15792326	4.124	-0.05	0.136	0.880232	FALSE	FALSE
SIDV3-Region_chr1:15833154-15833174	pool1	chr1	15833154	15833174	4.403	0.025	-0.003	0.998308	FALSE	FALSE
SIDV3-Region_chr1:15833288-15833308	pool1	chr1	15833288	15833308	3.817	-0.166	-0.184	0.83866	FALSE	FALSE
SIDV3-Region_chr1:15833464-15833484	pool1	chr1	15833464	15833484	4.196	-0.159	-0.324	0.556141	FALSE	FALSE
SIDV3-Region_chr1:15836990-15837010	pool1	chr1	15836990	15837010	4.688	0.518	0.287	0.549004	FALSE	FALSE
SIDV3-Region_chr1:15837075-15837095	pool1	chr1	15837075	15837095	4.648	0.381	0.091	0.924764	FALSE	FALSE
SIDV3-Region_chr1:15837236-15837256	pool1	chr1	15837236	15837256	1.892	-0.121	-0.168	0.939027	FALSE	FALSE
SIDV3-Region_chr1:15837302-15837322	pool1	chr1	15837302	15837322	4.151	-0.361	-0.169	0.829171	FALSE	FALSE
SIDV3-Region_chr1:15837376-15837396	pool1	chr1	15837376	15837396	4.401	0.203	0.232	0.712607	FALSE	FALSE
SIDV3-Region_chr1:15837536-15837556	pool1	chr1	15837536	15837556	4.327	-0.204	-0.171	0.822004	FALSE	FALSE
SIDV3-Region_chr1:15837658-15837678	pool1	chr1	15837658	15837678	2.592	0.089	0.323	0.769258	FALSE	FALSE
SIDV3-Region_chr1:16006992-16007012	pool1	chr1	16006992	16007012	4.042	-0.595	-0.378	0.497979	FALSE	FALSE
SIDV3-Region_chr1:16007068-16007088	pool1	chr1	16007068	16007088	4.595	0.313	0.241	0.670595	FALSE	FALSE
SIDV3-Region_chr1:16007120-16007140	pool1	chr1	16007120	16007140	3.335	0.4	0.22	0.830948	FALSE	FALSE
SIDV3-Region_chr1:16007288-16007308	pool1	chr1	16007288	16007308	3.424	0.016	0.247	0.809813	FALSE	FALSE
SIDV3-Region_chr1:16008963-16008983	pool1	chr1	16008963	16008983	3.769	0.313	0.261	0.789812	FALSE	FALSE
SIDV3-Region_chr1:16009167-16009187	pool1	chr1	16009167	16009187	4.704	0.169	0.009	0.993874	FALSE	FALSE
SIDV3-Region_chr1:16009263-16009283	pool1	chr1	16009263	16009283	3.736	0.032	-0.136	0.90185	FALSE	FALSE
SIDV3-Region_chr1:16009398-16009418	pool1	chr1	16009398	16009418	3.014	0.349	0.537	0.417103	FALSE	FALSE
SIDV3-Region_chr1:16013011-16013031	pool1	chr1	16013011	16013031	3.257	-0.357	-0.27	0.770804	FALSE	FALSE
SIDV3-Region_chr1:16013093-16013113	pool1	chr1	16013093	16013113	4.537	0.06	0.105	0.902196	FALSE	FALSE
SIDV3-Region_chr1:16013230-16013250	pool1	chr1	16013230	16013250	4.194	0.051	0.09	0.929292	FALSE	FALSE
SIDV3-Region_chr1:16013287-16013307	pool1	chr1	16013287	16013307	3.974	-0.081	-0.415	0.417593	FALSE	FALSE
SIDV3-Region_chr1:16013339-16013359	pool1	chr1	16013339	16013359	4.188	0.234	-0.02	0.990255	FALSE	FALSE
SIDV3-Region_chr1:16013439-16013459	pool1	chr1	16013439	16013459	3.926	0.421	0.422	0.458069	FALSE	FALSE
SIDV3-Region_chr1:16017243-16017263	pool1	chr1	16017243	16017263	3.648	-0.045	-0.149	0.885116	FALSE	FALSE
SIDV3-Region_chr1:16017319-16017339	pool1	chr1	16017319	16017339	3.274	0.316	0.472	0.50104	FALSE	FALSE
SIDV3-Region_chr1:16017421-16017441	pool1	chr1	16017421	16017441	3.818	0.013	0.121	0.905305	FALSE	FALSE
SIDV3-Region_chr1:16017538-16017558	pool1	chr1	16017538	16017558	3.541	-0.437	-0.275	0.736019	FALSE	FALSE
SIDV3-Region_chr1:16017619-16017639	pool1	chr1	16017619	16017639	4.251	-0.056	-0.078	0.940736	FALSE	FALSE
SIDV3-Region_chr1:16017675-16017695	pool1	chr1	16017675	16017695	4.752	-0.012	0	0.999823	FALSE	FALSE
SIDV3-Region_chr1:16026317-16026337	pool1	chr1	16026317	16026337	4.305	0.213	0.048	0.969515	FALSE	FALSE
SIDV3-Region_chr1:16026401-16026421	pool1	chr1	16026401	16026421	2.856	-0.53	-0.677	0.33566	FALSE	FALSE
SIDV3-Region_chr1:16026482-16026502	pool1	chr1	16026482	16026502	3.648	0.028	-0.064	0.961858	FALSE	FALSE
SIDV3-Region_chr1:16026552-16026572	pool1	chr1	16026552	16026572	2.835	-1.303	-0.235	0.862261	FALSE	FALSE
SIDV3-Region_chr1:16027074-16027094	pool1	chr1	16027074	16027094	3.71	-0.089	0.28	0.7115	FALSE	FALSE
SIDV3-Region_chr1:16027243-16027263	pool1	chr1	16027243	16027263	3.768	0.32	0.374	0.701216	FALSE	FALSE
SIDV3-Region_chr1:16027396-16027416	pool1	chr1	16027396	16027416	4.604	0.148	-0.039	0.972039	FALSE	FALSE
SIDV3-Region_chr1:16027479-16027499	pool1	chr1	16027479	16027499	3.583	-0.408	-0.104	0.92996	FALSE	FALSE
SIDV3-Region_chr1:16042035-16042055	pool1	chr1	16042035	16042055	4.494	0.358	0.14	0.856497	FALSE	FALSE
SIDV3-Region_chr1:16042176-16042196	pool1	chr1	16042176	16042196	4.611	0.2	0.207	0.729192	FALSE	FALSE
SIDV3-Region_chr1:16042255-16042275	pool1	chr1	16042255	16042275	3.307	-0.406	-0.134	0.917198	FALSE	FALSE
SIDV3-Region_chr1:16042466-16042486	pool1	chr1	16042466	16042486	3.918	0.273	-0.042	0.980169	FALSE	FALSE
SIDV3-Region_chr1:16046832-16046852	pool1	chr1	16046832	16046852	4.107	0.304	0.413	0.417708	FALSE	FALSE
SIDV3-Region_chr1:16046893-16046913	pool1	chr1	16046893	16046913	4.018	-0.022	0.006	0.996655	FALSE	FALSE
SIDV3-Region_chr1:16046998-16047018	pool1	chr1	16046998	16047018	2.952	0.086	-0.156	0.909938	FALSE	FALSE
SIDV3-Region_chr1:16047108-16047128	pool1	chr1	16047108	16047128	4.778	0.048	0.128	0.860592	FALSE	FALSE
SIDV3-Region_chr1:16048707-16048727	pool1	chr1	16048707	16048727	3.862	0.214	0.114	0.92488	FALSE	FALSE
SIDV3-Region_chr1:16048818-16048838	pool1	chr1	16048818	16048838	3.481	-0.175	-0.17	0.876719	FALSE	FALSE
SIDV3-Region_chr1:16048884-16048904	pool1	chr1	16048884	16048904	4.14	-0.189	0.083	0.950576	FALSE	FALSE
SIDV3-Region_chr1:16064486-16064506	pool1	chr1	16064486	16064506	3.905	-0.261	-0.079	0.953157	FALSE	FALSE
SIDV3-Region_chr1:16064627-16064647	pool1	chr1	16064627	16064647	4.526	-0.063	-0.145	0.856117	FALSE	FALSE
SIDV3-Region_chr1:16064748-16064768	pool1	chr1	16064748	16064768	3.587	-0.222	-0.143	0.905579	FALSE	FALSE
SIDV3-Region_chr1:16064817-16064837	pool1	chr1	16064817	16064837	3.871	0.398	0.283	0.671464	FALSE	FALSE
SIDV3-Region_chr1:16066873-16066893	pool1	chr1	16066873	16066893	4.313	0.178	-0.022	0.985894	FALSE	FALSE
SIDV3-Region_chr1:16066954-16066974	pool1	chr1	16066954	16066974	3.529	0.153	0.214	0.811604	FALSE	FALSE
SIDV3-Region_chr1:16067082-16067102	pool1	chr1	16067082	16067102	2.642	0.07	-0.365	0.770804	FALSE	FALSE
SIDV3-Region_chr1:16067157-16067177	pool1	chr1	16067157	16067177	4.076	0.011	0.006	0.996585	FALSE	FALSE
SIDV3-Region_chr1:16067251-16067271	pool1	chr1	16067251	16067271	3.134	-0.405	-0.447	0.539535	FALSE	FALSE
SIDV3-Region_chr1:16067307-16067327	pool1	chr1	16067307	16067327	4.909	0.249	0.004	0.997169	FALSE	FALSE
SIDV3-Region_chr1:16073066-16073086	pool1	chr1	16073066	16073086	4.48	0.218	0.354	0.419175	FALSE	FALSE
SIDV3-Region_chr1:16073169-16073189	pool1	chr1	16073169	16073189	4.147	0.012	0.172	0.819955	FALSE	FALSE
SIDV3-Region_chr1:16073224-16073244	pool1	chr1	16073224	16073244	3.965	0.071	0.246	0.806083	FALSE	FALSE
SIDV3-Region_chr1:16073298-16073318	pool1	chr1	16073298	16073318	3.922	-0.248	-0.086	0.9432	FALSE	FALSE
SIDV3-CAGE_chr1:16073342-16073362	pool1	chr1	16073342	16073362	3.782	0.056	0.128	0.903155	FALSE	FALSE
SIDV3-Region_chr1:16073473-16073493	pool1	chr1	16073473	16073493	4.275	-0.096	-0.106	0.909744	FALSE	FALSE
SIDV3-CAGE_chr1:16073593-16073613	pool1	chr1	16073593	16073613	3.901	0.019	0.216	0.791012	FALSE	FALSE
SIDV3-CAGE_chr1:16073644-16073664	pool1	chr1	16073644	16073664	4.312	0.244	0.171	0.810519	FALSE	FALSE
SIDV3-Region_chr1:16076108-16076128	pool1	chr1	16076108	16076128	4.634	0.453	0.251	0.659187	FALSE	FALSE
SIDV3-Region_chr1:16076179-16076199	pool1	chr1	16076179	16076199	3.58	0.139	0.291	0.703518	FALSE	FALSE
SIDV3-Region_chr1:16076335-16076355	pool1	chr1	16076335	16076355	3.833	-0.144	-0.121	0.91033	FALSE	FALSE
SIDV3-Region_chr1:16076386-16076406	pool1	chr1	16076386	16076406	4.184	0.269	0.258	0.70948	FALSE	FALSE
SIDV3-Region_chr1:16078897-16078917	pool1	chr1	16078897	16078917	4.861	0.166	0.161	0.799434	FALSE	FALSE
SIDV3-Region_chr1:16078994-16079014	pool1	chr1	16078994	16079014	2.721	-0.522	-0.746	0.222227	FALSE	FALSE
SIDV3-Region_chr1:16079102-16079122	pool1	chr1	16079102	16079122	3.986	0.468	0.315	0.604485	FALSE	FALSE
SIDV3-Region_chr1:16079222-16079242	pool1	chr1	16079222	16079242	4.206	-0.028	-0.008	0.995043	FALSE	FALSE
SIDV3-Region_chr1:16082340-16082360	pool1	chr1	16082340	16082360	4.147	0.335	0.061	0.967379	FALSE	FALSE
SIDV3-Region_chr1:16082416-16082436	pool1	chr1	16082416	16082436	2.451	0.491	0.782	0.247865	FALSE	FALSE
SIDV3-Region_chr1:16082493-16082513	pool1	chr1	16082493	16082513	3.606	0.298	0.215	0.826039	FALSE	FALSE
SIDV3-Region_chr1:16082568-16082588	pool1	chr1	16082568	16082588	3.625	0.492	0.386	0.561504	FALSE	FALSE
SIDV3-Region_chr1:16082637-16082657	pool1	chr1	16082637	16082657	3.53	0.137	0.22	0.841057	FALSE	FALSE
SIDV3-Region_chr1:16082705-16082725	pool1	chr1	16082705	16082725	3.988	0.196	0.283	0.674646	FALSE	FALSE
SIDV3-Region_chr1:16367128-16367148	pool1	chr1	16367128	16367148	4.503	0.43	0.133	0.875048	FALSE	FALSE
SIDV3-Region_chr1:16367294-16367314	pool1	chr1	16367294	16367314	4.015	-0.342	-0.567	0.118942	FALSE	FALSE
SIDV3-Region_chr1:16367398-16367418	pool1	chr1	16367398	16367418	3.83	-0.297	-0.062	0.960815	FALSE	FALSE
SIDV3-Region_chr1:16367518-16367538	pool1	chr1	16367518	16367538	3.477	-0.305	-0.229	0.804308	FALSE	FALSE
SIDV3-Region_chr1:16367589-16367609	pool1	chr1	16367589	16367609	3.185	-0.453	-0.303	0.740974	FALSE	FALSE
SIDV3-Region_chr1:16367684-16367704	pool1	chr1	16367684	16367704	4.242	0.113	0.185	0.811771	FALSE	FALSE
SIDV3-Region_chr1:16367792-16367812	pool1	chr1	16367792	16367812	3.1	-0.226	-0.424	0.623745	FALSE	FALSE
SIDV3-Region_chr1:16367924-16367944	pool1	chr1	16367924	16367944	3.888	0.1	0.158	0.864108	FALSE	FALSE
SIDV3-Region_chr1:16368198-16368218	pool1	chr1	16368198	16368218	3.693	0.139	0.002	0.999058	FALSE	FALSE
SIDV3-Region_chr1:16368272-16368292	pool1	chr1	16368272	16368292	3.015	0.078	0.62	0.589085	FALSE	FALSE
SIDV3-Region_chr1:16368373-16368393	pool1	chr1	16368373	16368393	3.737	-0.325	-0.398	0.501723	FALSE	FALSE
SIDV3-Region_chr1:16498759-16498779	pool1	chr1	16498759	16498779	4.019	-0.282	0.051	0.968208	FALSE	FALSE
SIDV3-Region_chr1:16498829-16498849	pool1	chr1	16498829	16498849	3.26	-0.57	-0.082	0.95616	FALSE	FALSE
SIDV3-Region_chr1:16498963-16498983	pool1	chr1	16498963	16498983	3.683	0.031	-0.078	0.950576	FALSE	FALSE
SIDV3-Region_chr1:16499037-16499057	pool1	chr1	16499037	16499057	4.502	0.306	0.327	0.488884	FALSE	FALSE
SIDV3-Region_chr1:16499105-16499125	pool1	chr1	16499105	16499125	4.228	0.323	0.054	0.966209	FALSE	FALSE
SIDV3-Region_chr1:16499174-16499194	pool1	chr1	16499174	16499194	3.477	0.368	0.141	0.906092	FALSE	FALSE
SIDV3-Region_chr1:16725048-16725068	pool1	chr1	16725048	16725068	4.357	0.311	0.17	0.833765	FALSE	FALSE
SIDV3-Region_chr1:16725113-16725133	pool1	chr1	16725113	16725133	3.579	-0.759	-0.438	0.494489	FALSE	FALSE
SIDV3-Region_chr1:16725304-16725324	pool1	chr1	16725304	16725324	3.336	-0.123	-0.119	0.927072	FALSE	FALSE
SIDV3-Region_chr1:16888833-16888853	pool1	chr1	16888833	16888853	4.256	-0.532	-0.29	0.655634	FALSE	FALSE
SIDV3-Region_chr1:16888915-16888935	pool1	chr1	16888915	16888935	4.26	-0.124	-0.241	0.711181	FALSE	FALSE
SIDV3-Region_chr1:16888978-16888998	pool1	chr1	16888978	16888998	3.946	-0.068	-0.083	0.944095	FALSE	FALSE
SIDV3-Region_chr1:16889285-16889305	pool1	chr1	16889285	16889305	3.898	-0.28	-0.475	0.294354	FALSE	FALSE
SIDV3-Region_chr1:16889426-16889446	pool1	chr1	16889426	16889446	4.146	-0.003	-0.33	0.540976	FALSE	FALSE
SIDV3-Region_chr1:16921647-16921667	pool1	chr1	16921647	16921667	4.312	-0.206	-0.008	0.995043	FALSE	FALSE
SIDV3-Region_chr1:16921868-16921888	pool1	chr1	16921868	16921888	4.794	0.751	0.332	0.443349	FALSE	FALSE
SIDV3-Region_chr1:16922011-16922031	pool1	chr1	16922011	16922031	3.334	0.005	0.199	0.853171	FALSE	FALSE
SIDV3-Region_chr1:16923030-16923050	pool1	chr1	16923030	16923050	3.845	-0.562	-0.495	0.391618	FALSE	FALSE
SIDV3-Region_chr1:16923180-16923200	pool1	chr1	16923180	16923200	4.613	-0.016	-0.133	0.875912	FALSE	FALSE
SIDV3-Region_chr1:16923370-16923390	pool1	chr1	16923370	16923390	4.341	-0.025	0.061	0.957618	FALSE	FALSE
SIDV3-Region_chr1:16923449-16923469	pool1	chr1	16923449	16923469	3	-0.073	0.066	0.970766	FALSE	FALSE
SIDV3-Region_chr1:16924945-16924965	pool1	chr1	16924945	16924965	3.484	-0.357	-0.343	0.696186	FALSE	FALSE
SIDV3-Region_chr1:16925026-16925046	pool1	chr1	16925026	16925046	4.789	0.305	0.009	0.995043	FALSE	FALSE
SIDV3-Region_chr1:16925116-16925136	pool1	chr1	16925116	16925136	3.721	0.361	0.288	0.711632	FALSE	FALSE
SIDV3-Region_chr1:16925305-16925325	pool1	chr1	16925305	16925325	2.187	0.504	0.239	0.881289	FALSE	FALSE
SIDV3-Region_chr1:16948377-16948397	pool1	chr1	16948377	16948397	4.489	0.476	0.354	0.452215	FALSE	FALSE
SIDV3-Region_chr1:16948468-16948488	pool1	chr1	16948468	16948488	4.272	-0.272	-0.349	0.506855	FALSE	FALSE
SIDV3-Region_chr1:16948581-16948601	pool1	chr1	16948581	16948601	4.91	0.023	0.123	0.866786	FALSE	FALSE
SIDV3-Region_chr1:16959619-16959639	pool1	chr1	16959619	16959639	2.82	0.295	0.14	0.925411	FALSE	FALSE
SIDV3-Region_chr1:16959721-16959741	pool1	chr1	16959721	16959741	2.518	0.044	0.071	0.973242	FALSE	FALSE
SIDV3-Region_chr1:16959791-16959811	pool1	chr1	16959791	16959811	4.79	-0.05	-0.171	0.797838	FALSE	FALSE
SIDV3-Region_chr1:16959856-16959876	pool1	chr1	16959856	16959876	4.921	0.175	0.361	0.372153	FALSE	FALSE
SIDV3-Region_chr1:16960595-16960615	pool1	chr1	16960595	16960615	3.173	-0.016	0.274	0.781459	FALSE	FALSE
SIDV3-Region_chr1:16960878-16960898	pool1	chr1	16960878	16960898	4.348	0.255	0.181	0.790838	FALSE	FALSE
SIDV3-Region_chr1:16960931-16960951	pool1	chr1	16960931	16960951	3.954	0.234	0.001	0.999687	FALSE	FALSE
SIDV3-Region_chr1:16963224-16963244	pool1	chr1	16963224	16963244	3.668	-0.148	-0.256	0.770212	FALSE	FALSE
SIDV3-Region_chr1:16963287-16963307	pool1	chr1	16963287	16963307	3.86	-0.185	-0.115	0.917197	FALSE	FALSE
SIDV3-Region_chr1:16963339-16963359	pool1	chr1	16963339	16963359	4.014	0.059	-0.153	0.860733	FALSE	FALSE
SIDV3-Region_chr1:16963448-16963468	pool1	chr1	16963448	16963468	2.073	-0.249	-0.055	0.980111	FALSE	FALSE
SIDV3-Region_chr1:16963516-16963536	pool1	chr1	16963516	16963536	4.25	0.077	-0.106	0.906166	FALSE	FALSE
SIDV3-Region_chr1:16971553-16971573	pool1	chr1	16971553	16971573	3.466	0.365	0.311	0.682412	FALSE	FALSE
SIDV3-Region_chr1:16971616-16971636	pool1	chr1	16971616	16971636	4.509	0.192	0.049	0.963689	FALSE	FALSE
SIDV3-Region_chr1:16971724-16971744	pool1	chr1	16971724	16971744	3.597	-0.255	-0.113	0.920365	FALSE	FALSE
SIDV3-Region_chr1:16971786-16971806	pool1	chr1	16971786	16971806	4.381	0.412	0.263	0.63513	FALSE	FALSE
SIDV3-Region_chr1:16986344-16986364	pool1	chr1	16986344	16986364	4.621	0.062	-0.17	0.803192	FALSE	FALSE
SIDV3-Region_chr1:16986479-16986499	pool1	chr1	16986479	16986499	3.732	-0.378	-0.393	0.560362	FALSE	FALSE
SIDV3-Region_chr1:16986532-16986552	pool1	chr1	16986532	16986552	3.801	0.048	0.226	0.836301	FALSE	FALSE
SIDV3-Region_chr1:16986594-16986614	pool1	chr1	16986594	16986614	4.129	-0.081	0.073	0.946683	FALSE	FALSE
SIDV3-Region_chr1:16986788-16986808	pool1	chr1	16986788	16986808	4.701	0.376	0.237	0.697564	FALSE	FALSE
SIDV3-CAGE_chr1:17011658-17011678	pool1	chr1	17011658	17011678	3.675	-0.144	-0.048	0.97495	FALSE	FALSE
SIDV3-CAGE_chr1:17011730-17011750	pool1	chr1	17011730	17011750	4.119	0.004	0.065	0.955163	FALSE	FALSE
SIDV3-CAGE_chr1:17011810-17011830	pool1	chr1	17011810	17011830	3.862	-0.51	-0.39	0.494419	FALSE	FALSE
SIDV3-CAGE_chr1:17011895-17011915	pool1	chr1	17011895	17011915	3.444	0.034	0.01	0.995128	FALSE	FALSE
SIDV3-Region_chr1:17370654-17370674	pool1	chr1	17370654	17370674	2.86	0.675	0.978	0.0384196	FALSE	TRUE
SIDV3-Region_chr1:17370777-17370797	pool1	chr1	17370777	17370797	3.987	0.464	0.303	0.615605	FALSE	FALSE
SIDV3-Region_chr1:17370851-17370871	pool1	chr1	17370851	17370871	3.975	0.294	-0.016	0.991618	FALSE	FALSE
SIDV3-Region_chr1:17400877-17400897	pool1	chr1	17400877	17400897	3.576	-0.536	-0.273	0.743918	FALSE	FALSE
SIDV3-Region_chr1:17400936-17400956	pool1	chr1	17400936	17400956	3.193	-0.227	0	1	FALSE	FALSE
SIDV3-Region_chr1:17401070-17401090	pool1	chr1	17401070	17401090	3.135	-0.107	-0.208	0.850577	FALSE	FALSE
SIDV3-Region_chr1:17401187-17401207	pool1	chr1	17401187	17401207	2.261	-0.292	-0.22	0.88293	FALSE	FALSE
SIDV3-Region_chr1:17401242-17401262	pool1	chr1	17401242	17401262	3.523	-0.338	-0.309	0.758254	FALSE	FALSE
SIDV3-Region_chr1:17401314-17401334	pool1	chr1	17401314	17401334	3.907	0.021	-0.03	0.981805	FALSE	FALSE
SIDV3-Region_chr1:17406109-17406129	pool1	chr1	17406109	17406129	3.987	-0.087	-0.19	0.828845	FALSE	FALSE
SIDV3-Region_chr1:17406343-17406363	pool1	chr1	17406343	17406363	4.561	0.102	0.09	0.917593	FALSE	FALSE
SIDV3-Region_chr1:17406460-17406480	pool1	chr1	17406460	17406480	4.053	0.016	0.014	0.992018	FALSE	FALSE
SIDV3-Region_chr1:17406526-17406546	pool1	chr1	17406526	17406546	3.07	0.148	0.109	0.939381	FALSE	FALSE
SIDV3-Region_chr1:17419823-17419843	pool1	chr1	17419823	17419843	4.923	0.077	0.016	0.989887	FALSE	FALSE
SIDV3-Region_chr1:17419923-17419943	pool1	chr1	17419923	17419943	3.819	-0.039	-0.086	0.938711	FALSE	FALSE
SIDV3-Region_chr1:17420029-17420049	pool1	chr1	17420029	17420049	3.633	-0.146	-0.093	0.945704	FALSE	FALSE
SIDV3-Region_chr1:17420172-17420192	pool1	chr1	17420172	17420192	3.199	-0.038	-0.104	0.939642	FALSE	FALSE
SIDV3-Region_chr1:17423947-17423967	pool1	chr1	17423947	17423967	2.084	-0.506	-0.311	0.822004	FALSE	FALSE
SIDV3-Region_chr1:17424005-17424025	pool1	chr1	17424005	17424025	4.269	0.341	0.215	0.773538	FALSE	FALSE
SIDV3-Region_chr1:17424083-17424103	pool1	chr1	17424083	17424103	4.217	0.134	0.381	0.478123	FALSE	FALSE
SIDV3-Region_chr1:17424146-17424166	pool1	chr1	17424146	17424166	4.42	0.051	0.072	0.944781	FALSE	FALSE
SIDV3-Region_chr1:17424271-17424291	pool1	chr1	17424271	17424291	3.12	0.098	0.002	0.999093	FALSE	FALSE
SIDV3-Region_chr1:17424347-17424367	pool1	chr1	17424347	17424367	3.233	-0.056	0.026	0.988061	FALSE	FALSE
SIDV3-Region_chr1:17427132-17427152	pool1	chr1	17427132	17427152	4.186	-0.088	-0.027	0.983166	FALSE	FALSE
SIDV3-Region_chr1:17427282-17427302	pool1	chr1	17427282	17427302	4.478	-0.069	-0.09	0.925668	FALSE	FALSE
SIDV3-Region_chr1:17427374-17427394	pool1	chr1	17427374	17427394	3.487	-0.141	-0.023	0.98907	FALSE	FALSE
SIDV3-Region_chr1:17432168-17432188	pool1	chr1	17432168	17432188	1.827	0.171	-0.011	0.996139	FALSE	FALSE
SIDV3-Region_chr1:17432371-17432391	pool1	chr1	17432371	17432391	3.594	0.048	0.301	0.703518	FALSE	FALSE
SIDV3-Region_chr1:17432475-17432495	pool1	chr1	17432475	17432495	4.772	-0.003	-0.028	0.979895	FALSE	FALSE
SIDV3-CAGE_chr1:17438247-17438267	pool1	chr1	17438247	17438267	4.284	0.038	-0.189	0.786406	FALSE	FALSE
SIDV3-CAGE_chr1:17438420-17438440	pool1	chr1	17438420	17438440	3.502	0.079	0.112	0.929052	FALSE	FALSE
SIDV3-CAGE_chr1:17438533-17438553	pool1	chr1	17438533	17438553	4.34	-0.658	-0.574	0.0543082	FALSE	FALSE
SIDV3-Region_chr1:17460206-17460226	pool1	chr1	17460206	17460226	1.475	-0.602	-0.354	0.811252	FALSE	FALSE
SIDV3-Region_chr1:17460390-17460410	pool1	chr1	17460390	17460410	4.467	0.39	0.308	0.546855	FALSE	FALSE
SIDV3-Region_chr1:17460504-17460524	pool1	chr1	17460504	17460524	4.495	-0.087	0.009	0.995043	FALSE	FALSE
SIDV3-Region_chr1:17460564-17460584	pool1	chr1	17460564	17460584	3.813	0.034	-0.066	0.959053	FALSE	FALSE
SIDV3-CAGE_chr1:17539635-17539655	pool1	chr1	17539635	17539655	3.696	0.259	0.301	0.679301	FALSE	FALSE
SIDV3-CAGE_chr1:17539690-17539710	pool1	chr1	17539690	17539710	3.726	-0.185	-0.192	0.826939	FALSE	FALSE
SIDV3-CAGE_chr1:17539743-17539763	pool1	chr1	17539743	17539763	3.48	0.196	0.105	0.939561	FALSE	FALSE
SIDV3-CAGE_chr1:17539829-17539849	pool1	chr1	17539829	17539849	4.234	0.325	0.156	0.857994	FALSE	FALSE
SIDV3-CAGE_chr1:17539891-17539911	pool1	chr1	17539891	17539911	3.463	-0.1	-0.112	0.926023	FALSE	FALSE
SIDV3-CAGE_chr1:17539963-17539983	pool1	chr1	17539963	17539983	2.677	-0.242	-0.644	0.377354	FALSE	FALSE
SIDV3-Region_chr1:17559281-17559301	pool1	chr1	17559281	17559301	3.745	-0.005	0.02	0.990091	FALSE	FALSE
SIDV3-Region_chr1:17559335-17559355	pool1	chr1	17559335	17559355	4.815	-0.042	-0.043	0.967967	FALSE	FALSE
SIDV3-Region_chr1:17559439-17559459	pool1	chr1	17559439	17559459	4.698	0.374	0.343	0.721419	FALSE	FALSE
SIDV3-Region_chr1:17559549-17559569	pool1	chr1	17559549	17559569	3.216	0.364	0.052	0.980143	FALSE	FALSE
SIDV3-Region_chr1:17559698-17559718	pool1	chr1	17559698	17559718	4.132	-0.245	-0.068	0.956698	FALSE	FALSE
SIDV3-Region_chr1:17559753-17559773	pool1	chr1	17559753	17559773	4.082	0.275	0.322	0.616672	FALSE	FALSE
SIDV3-Region_chr1:17559981-17560001	pool1	chr1	17559981	17560001	2.66	-0.6	-0.55	0.490813	FALSE	FALSE
SIDV3-Region_chr1:17560118-17560138	pool1	chr1	17560118	17560138	4.225	0.017	0.005	0.997395	FALSE	FALSE
SIDV3-Region_chr1:17560169-17560189	pool1	chr1	17560169	17560189	4.126	-0.346	-0.298	0.599892	FALSE	FALSE
SIDV3-Region_chr1:17561204-17561224	pool1	chr1	17561204	17561224	3.63	-0.064	0.213	0.81844	FALSE	FALSE
SIDV3-Region_chr1:17561272-17561292	pool1	chr1	17561272	17561292	4.138	-0.09	-0.096	0.92311	FALSE	FALSE
SIDV3-Region_chr1:17561343-17561363	pool1	chr1	17561343	17561363	3.762	-0.306	-0.245	0.758254	FALSE	FALSE
SIDV3-Region_chr1:17561436-17561456	pool1	chr1	17561436	17561456	4.043	-0.682	-0.492	0.218618	FALSE	FALSE
SIDV3-Region_chr1:17561493-17561513	pool1	chr1	17561493	17561513	4.377	-0.304	-0.21	0.740784	FALSE	FALSE
SIDV3-Region_chr1:17561548-17561568	pool1	chr1	17561548	17561568	4.228	-0.162	-0.088	0.935771	FALSE	FALSE
SIDV3-Region_chr1:17561709-17561729	pool1	chr1	17561709	17561729	4.808	0.326	0.059	0.95616	FALSE	FALSE
SIDV3-Region_chr1:17561880-17561900	pool1	chr1	17561880	17561900	4.568	0.04	-0.019	0.986838	FALSE	FALSE
SIDV3-Region_chr1:17561946-17561966	pool1	chr1	17561946	17561966	3.887	-0.192	-0.174	0.840645	FALSE	FALSE
SIDV3-Region_chr1:17601791-17601811	pool1	chr1	17601791	17601811	4.081	0.418	0.223	0.798015	FALSE	FALSE
SIDV3-Region_chr1:17601863-17601883	pool1	chr1	17601863	17601883	4.261	0.383	0.5	0.168595	FALSE	FALSE
SIDV3-Region_chr1:17601935-17601955	pool1	chr1	17601935	17601955	4.064	-0.372	-0.159	0.860061	FALSE	FALSE
SIDV3-Region_chr1:17602041-17602061	pool1	chr1	17602041	17602061	5.433	0.476	0.148	0.822287	FALSE	FALSE
SIDV3-Region_chr1:17603231-17603251	pool1	chr1	17603231	17603251	4.702	0.26	0.139	0.844731	FALSE	FALSE
SIDV3-Region_chr1:17603336-17603356	pool1	chr1	17603336	17603356	4.312	-0.048	0.159	0.829395	FALSE	FALSE
SIDV3-Region_chr1:17603416-17603436	pool1	chr1	17603416	17603436	4.427	-0.005	0.114	0.91017	FALSE	FALSE
SIDV3-Region_chr1:17603467-17603487	pool1	chr1	17603467	17603487	4.236	-0.029	-0.093	0.936203	FALSE	FALSE
SIDV3-Region_chr1:17603562-17603582	pool1	chr1	17603562	17603582	3.594	-0.28	-0.345	0.622736	FALSE	FALSE
SIDV3-Region_chr1:17606789-17606809	pool1	chr1	17606789	17606809	4.572	0.26	0.269	0.653572	FALSE	FALSE
SIDV3-Region_chr1:17606897-17606917	pool1	chr1	17606897	17606917	3.696	-0.108	-0.097	0.93293	FALSE	FALSE
SIDV3-Region_chr1:17606962-17606982	pool1	chr1	17606962	17606982	4.015	0.171	0.286	0.646903	FALSE	FALSE
SIDV3-Region_chr1:17607029-17607049	pool1	chr1	17607029	17607049	3.253	-0.182	-0.164	0.889982	FALSE	FALSE
SIDV3-Region_chr1:17607601-17607621	pool1	chr1	17607601	17607621	3.313	-0.17	0.124	0.923164	FALSE	FALSE
SIDV3-Region_chr1:17607706-17607726	pool1	chr1	17607706	17607726	4.356	0.158	0.291	0.579967	FALSE	FALSE
SIDV3-Region_chr1:17607772-17607792	pool1	chr1	17607772	17607792	4.546	0.241	-0.001	0.999168	FALSE	FALSE
SIDV3-Region_chr1:17607849-17607869	pool1	chr1	17607849	17607869	4.798	0.234	0.082	0.928284	FALSE	FALSE
SIDV3-Region_chr1:17607929-17607949	pool1	chr1	17607929	17607949	4.176	0.025	0.177	0.855401	FALSE	FALSE
SIDV3-Region_chr1:17607989-17608009	pool1	chr1	17607989	17608009	4.3	-0.141	0.088	0.929705	FALSE	FALSE
SIDV3-Region_chr1:17627385-17627405	pool1	chr1	17627385	17627405	4.737	0.285	0.194	0.80062	FALSE	FALSE
SIDV3-Region_chr1:17627573-17627593	pool1	chr1	17627573	17627593	4.424	-0.112	-0.224	0.711933	FALSE	FALSE
SIDV3-Region_chr1:17627644-17627664	pool1	chr1	17627644	17627664	4.066	0.267	0.064	0.959166	FALSE	FALSE
SIDV3-Region_chr1:17629453-17629473	pool1	chr1	17629453	17629473	4.883	0.806	0.367	0.352731	FALSE	FALSE
SIDV3-Region_chr1:17629617-17629637	pool1	chr1	17629617	17629637	3.981	0.166	0.12	0.903507	FALSE	FALSE
SIDV3-Region_chr1:17629711-17629731	pool1	chr1	17629711	17629731	4.002	-0.08	-0.08	0.952213	FALSE	FALSE
SIDV3-Region_chr1:17629812-17629832	pool1	chr1	17629812	17629832	3.793	-0.219	-0.143	0.895229	FALSE	FALSE
SIDV3-Region_chr1:17646821-17646841	pool1	chr1	17646821	17646841	4.523	0.212	-0.059	0.959618	FALSE	FALSE
SIDV3-Region_chr1:17646926-17646946	pool1	chr1	17646926	17646946	3.469	0.228	0.099	0.938567	FALSE	FALSE
SIDV3-Region_chr1:17647000-17647020	pool1	chr1	17647000	17647020	3.377	-0.151	0.286	0.744667	FALSE	FALSE
SIDV3-Region_chr1:17647054-17647074	pool1	chr1	17647054	17647074	4.036	0.202	0.188	0.822004	FALSE	FALSE
SIDV3-Region_chr1:17647147-17647167	pool1	chr1	17647147	17647167	4.862	0.069	-0.22	0.701063	FALSE	FALSE
SIDV3-Region_chr1:17647225-17647245	pool1	chr1	17647225	17647245	4.582	0.162	0.023	0.983407	FALSE	FALSE
SIDV3-Region_chr1:17653821-17653841	pool1	chr1	17653821	17653841	4.472	0.015	-0.056	0.957359	FALSE	FALSE
SIDV3-Region_chr1:17653904-17653924	pool1	chr1	17653904	17653924	3.875	-0.423	-0.525	0.204921	FALSE	FALSE
SIDV3-Region_chr1:17654129-17654149	pool1	chr1	17654129	17654149	3.923	0.267	0.223	0.775346	FALSE	FALSE
SIDV3-Region_chr1:17654645-17654665	pool1	chr1	17654645	17654665	4.207	0.46	0.419	0.320607	FALSE	FALSE
SIDV3-Region_chr1:17654718-17654738	pool1	chr1	17654718	17654738	3.566	0.59	0.444	0.486222	FALSE	FALSE
SIDV3-Region_chr1:17654890-17654910	pool1	chr1	17654890	17654910	3.486	0.011	-0.11	0.927508	FALSE	FALSE
SIDV3-Region_chr1:17661519-17661539	pool1	chr1	17661519	17661539	4.226	-0.138	-0.125	0.884791	FALSE	FALSE
SIDV3-Region_chr1:17661570-17661590	pool1	chr1	17661570	17661590	4.082	0.141	0.185	0.812314	FALSE	FALSE
SIDV3-Region_chr1:17661753-17661773	pool1	chr1	17661753	17661773	3.583	0.004	0.01	0.995288	FALSE	FALSE
SIDV3-Region_chr1:17661816-17661836	pool1	chr1	17661816	17661836	3.351	0.086	0.097	0.941961	FALSE	FALSE
SIDV3-Region_chr1:17661976-17661996	pool1	chr1	17661976	17661996	4.465	0.279	0.147	0.840192	FALSE	FALSE
SIDV3-Region_chr1:17664222-17664242	pool1	chr1	17664222	17664242	3.561	0.087	0.04	0.979587	FALSE	FALSE
SIDV3-Region_chr1:17664383-17664403	pool1	chr1	17664383	17664403	3.777	-0.54	-0.553	0.19839	FALSE	FALSE
SIDV3-Region_chr1:17664474-17664494	pool1	chr1	17664474	17664494	4.481	-0.175	-0.111	0.899749	FALSE	FALSE
SIDV3-Region_chr1:17667344-17667364	pool1	chr1	17667344	17667364	3.931	-0.211	0.04	0.97565	FALSE	FALSE
SIDV3-Region_chr1:17667419-17667439	pool1	chr1	17667419	17667439	2.631	0.295	0.166	0.911768	FALSE	FALSE
SIDV3-Region_chr1:17667513-17667533	pool1	chr1	17667513	17667533	4.441	0.4	0.024	0.982482	FALSE	FALSE
SIDV3-Region_chr1:17667719-17667739	pool1	chr1	17667719	17667739	3.477	-0.01	0.04	0.98011	FALSE	FALSE
SIDV3-Region_chr1:17668826-17668846	pool1	chr1	17668826	17668846	3.578	0.027	0.114	0.928714	FALSE	FALSE
SIDV3-Region_chr1:17668885-17668905	pool1	chr1	17668885	17668905	4.092	-0.468	-0.283	0.670721	FALSE	FALSE
SIDV3-Region_chr1:17669067-17669087	pool1	chr1	17669067	17669087	4.647	0.09	-0.029	0.980143	FALSE	FALSE
SIDV3-Region_chr1:17671935-17671955	pool1	chr1	17671935	17671955	3.126	-0.308	-0.367	0.649775	FALSE	FALSE
SIDV3-Region_chr1:17672067-17672087	pool1	chr1	17672067	17672087	4.97	0.041	0.168	0.787862	FALSE	FALSE
SIDV3-Region_chr1:17672272-17672292	pool1	chr1	17672272	17672292	3.11	0.13	0.277	0.773632	FALSE	FALSE
SIDV3-Region_chr1:18569892-18569912	pool1	chr1	18569892	18569912	4.145	-0.352	-0.045	0.976603	FALSE	FALSE
SIDV3-Region_chr1:18570015-18570035	pool1	chr1	18570015	18570035	3.686	-0.536	-0.18	0.873291	FALSE	FALSE
SIDV3-Region_chr1:18570087-18570107	pool1	chr1	18570087	18570107	4.553	0.151	0.251	0.63511	FALSE	FALSE
SIDV3-Region_chr1:18570185-18570205	pool1	chr1	18570185	18570205	3.601	-0.713	-0.146	0.894753	FALSE	FALSE
SIDV3-Region_chr1:18570286-18570306	pool1	chr1	18570286	18570306	4.064	-0.3	-0.029	0.98282	FALSE	FALSE
SIDV3-Region_chr1:18575526-18575546	pool1	chr1	18575526	18575546	3.702	-0.121	0.05	0.970795	FALSE	FALSE
SIDV3-Region_chr1:18575582-18575602	pool1	chr1	18575582	18575602	4.535	-0.011	0.043	0.969875	FALSE	FALSE
SIDV3-Region_chr1:18575725-18575745	pool1	chr1	18575725	18575745	4.446	0.549	0.329	0.481903	FALSE	FALSE
SIDV3-Region_chr1:18575841-18575861	pool1	chr1	18575841	18575861	0.975	-1.773	-0.703	0.665582	FALSE	FALSE
SIDV3-Region_chr1:18575967-18575987	pool1	chr1	18575967	18575987	3.928	-0.202	-0.106	0.922675	FALSE	FALSE
SIDV3-Region_chr1:18581375-18581395	pool1	chr1	18581375	18581395	3.918	0.251	0.159	0.872019	FALSE	FALSE
SIDV3-Region_chr1:18581473-18581493	pool1	chr1	18581473	18581493	3.176	-0.195	-0.185	0.892869	FALSE	FALSE
SIDV3-Region_chr1:18581590-18581610	pool1	chr1	18581590	18581610	4.258	0.04	-0.175	0.821008	FALSE	FALSE
SIDV3-Region_chr1:18581643-18581663	pool1	chr1	18581643	18581663	3.123	-0.16	-0.082	0.96926	FALSE	FALSE
SIDV3-Region_chr1:18584755-18584775	pool1	chr1	18584755	18584775	4.32	-0.393	-0.184	0.799203	FALSE	FALSE
SIDV3-Region_chr1:18584814-18584834	pool1	chr1	18584814	18584834	2.976	-0.087	-0.083	0.959006	FALSE	FALSE
SIDV3-Region_chr1:18584888-18584908	pool1	chr1	18584888	18584908	3.564	-0.09	-0.051	0.971239	FALSE	FALSE
SIDV3-Region_chr1:18584988-18585008	pool1	chr1	18584988	18585008	3.971	0.062	0.19	0.842219	FALSE	FALSE
SIDV3-Region_chr1:18597229-18597249	pool1	chr1	18597229	18597249	4.162	-0.051	0.073	0.945704	FALSE	FALSE
SIDV3-Region_chr1:18597315-18597335	pool1	chr1	18597315	18597335	4.154	-0.279	-0.012	0.992615	FALSE	FALSE
SIDV3-Region_chr1:18597439-18597459	pool1	chr1	18597439	18597459	2.352	-0.358	-0.264	0.841177	FALSE	FALSE
SIDV3-Region_chr1:18597514-18597534	pool1	chr1	18597514	18597534	4.145	-0.261	-0.182	0.829159	FALSE	FALSE
SIDV3-Region_chr1:18597595-18597615	pool1	chr1	18597595	18597615	3.765	-0.069	-0.048	0.971744	FALSE	FALSE
SIDV3-Region_chr1:18636312-18636332	pool1	chr1	18636312	18636332	3.526	-0.75	-0.516	0.436363	FALSE	FALSE
SIDV3-Region_chr1:18636366-18636386	pool1	chr1	18636366	18636386	3.304	0.467	0.405	0.565022	FALSE	FALSE
SIDV3-Region_chr1:18636477-18636497	pool1	chr1	18636477	18636497	3.156	-0.41	-0.492	0.48125	FALSE	FALSE
SIDV3-Region_chr1:18636538-18636558	pool1	chr1	18636538	18636558	3.875	-0.571	-0.328	0.593058	FALSE	FALSE
SIDV3-Region_chr1:18636622-18636642	pool1	chr1	18636622	18636642	3.857	-0.11	0.051	0.969011	FALSE	FALSE
SIDV3-Region_chr1:18636692-18636712	pool1	chr1	18636692	18636712	4.33	0.092	-0.02	0.987332	FALSE	FALSE
SIDV3-Region_chr1:18844966-18844986	pool1	chr1	18844966	18844986	4.339	0.455	0.228	0.716841	FALSE	FALSE
SIDV3-Region_chr1:18845097-18845117	pool1	chr1	18845097	18845117	5.034	0.667	0.689	0.111621	FALSE	FALSE
SIDV3-Region_chr1:18845197-18845217	pool1	chr1	18845197	18845217	4.343	-0.137	-0.216	0.749336	FALSE	FALSE
SIDV3-Region_chr1:18854685-18854705	pool1	chr1	18854685	18854705	4.53	0.387	0.084	0.924876	FALSE	FALSE
SIDV3-Region_chr1:18854763-18854783	pool1	chr1	18854763	18854783	3.928	-0.273	-0.287	0.670027	FALSE	FALSE
SIDV3-Region_chr1:18854825-18854845	pool1	chr1	18854825	18854845	4.318	0.118	-0.003	0.99833	FALSE	FALSE
SIDV3-Region_chr1:18854883-18854903	pool1	chr1	18854883	18854903	3.956	-0.163	0.013	0.992939	FALSE	FALSE
SIDV3-Region_chr1:18854973-18854993	pool1	chr1	18854973	18854993	3.617	-0.198	-0.116	0.921556	FALSE	FALSE
SIDV3-Region_chr1:18855077-18855097	pool1	chr1	18855077	18855097	4.337	-0.141	-0.162	0.846909	FALSE	FALSE
SIDV3-Region_chr1:18865127-18865147	pool1	chr1	18865127	18865147	3.832	-0.173	-0.172	0.842437	FALSE	FALSE
SIDV3-Region_chr1:18865184-18865204	pool1	chr1	18865184	18865204	2.957	-0.372	-0.346	0.716171	FALSE	FALSE
SIDV3-Region_chr1:18865255-18865275	pool1	chr1	18865255	18865275	3.665	0.491	0.201	0.816333	FALSE	FALSE
SIDV3-Region_chr1:18865310-18865330	pool1	chr1	18865310	18865330	4.098	-0.242	-0.176	0.836654	FALSE	FALSE
SIDV3-Region_chr1:18865443-18865463	pool1	chr1	18865443	18865463	3.297	-0.183	-0.193	0.873966	FALSE	FALSE
SIDV3-Region_chr1:18875294-18875314	pool1	chr1	18875294	18875314	4.408	0.185	0.263	0.659364	FALSE	FALSE
SIDV3-Region_chr1:18875414-18875434	pool1	chr1	18875414	18875434	4.665	0.417	0.562	0.0462176	FALSE	FALSE
SIDV3-Region_chr1:18875468-18875488	pool1	chr1	18875468	18875488	3.993	-0.343	-0.241	0.731996	FALSE	FALSE
SIDV3-Region_chr1:18884226-18884246	pool1	chr1	18884226	18884246	4.298	0.016	0.114	0.897621	FALSE	FALSE
SIDV3-Region_chr1:18884311-18884331	pool1	chr1	18884311	18884331	4.132	-0.007	0	0.999823	FALSE	FALSE
SIDV3-Region_chr1:18884416-18884436	pool1	chr1	18884416	18884436	5.116	0.475	-0.181	0.763103	FALSE	FALSE
SIDV3-Region_chr1:18884474-18884494	pool1	chr1	18884474	18884494	4.297	0.135	0.047	0.967422	FALSE	FALSE
SIDV3-CAGE_chr1:18902243-18902263	pool1	chr1	18902243	18902263	3.449	0.283	0.183	0.861938	FALSE	FALSE
SIDV3-CAGE_chr1:18902324-18902344	pool1	chr1	18902324	18902344	4.472	0.297	0.267	0.608567	FALSE	FALSE
SIDV3-CAGE_chr1:18902419-18902439	pool1	chr1	18902419	18902439	3.467	-0.168	-0.042	0.978729	FALSE	FALSE
SIDV3-CAGE_chr1:18902516-18902536	pool1	chr1	18902516	18902536	3.273	-0.245	-0.285	0.750647	FALSE	FALSE
SIDV3-CAGE_chr1:18902587-18902607	pool1	chr1	18902587	18902607	3.242	0.007	0.454	0.498662	FALSE	FALSE
SIDV3-Region_chr1:18902783-18902803	pool1	chr1	18902783	18902803	2.014	0.44	0.557	0.560113	FALSE	FALSE
SIDV3-Region_chr1:18902849-18902869	pool1	chr1	18902849	18902869	2.834	-0.049	-0.05	0.978646	FALSE	FALSE
SIDV3-Region_chr1:18902938-18902958	pool1	chr1	18902938	18902958	4.056	-0.123	-0.057	0.961604	FALSE	FALSE
SIDV3-Region_chr1:18903073-18903093	pool1	chr1	18903073	18903093	3.743	0.24	0.037	0.9802	FALSE	FALSE
SIDV3-Region_chr1:18903190-18903210	pool1	chr1	18903190	18903210	3.69	0.087	0.095	0.933005	FALSE	FALSE
SIDV3-Region_chr1:18906946-18906966	pool1	chr1	18906946	18906966	3.04	0.157	0.308	0.745396	FALSE	FALSE
SIDV3-Region_chr1:18907009-18907029	pool1	chr1	18907009	18907029	3.797	-0.037	0.116	0.914897	FALSE	FALSE
SIDV3-Region_chr1:18907338-18907358	pool1	chr1	18907338	18907358	4.013	-0.181	-0.006	0.996115	FALSE	FALSE
SIDV3-Region_chr1:18912968-18912988	pool1	chr1	18912968	18912988	3.563	0.225	0.275	0.747537	FALSE	FALSE
SIDV3-Region_chr1:18913159-18913179	pool1	chr1	18913159	18913179	4.122	0.044	0.078	0.941961	FALSE	FALSE
SIDV3-Region_chr1:18913212-18913232	pool1	chr1	18913212	18913232	4.03	-0.087	-0.124	0.91033	FALSE	FALSE
SIDV3-Region_chr1:18913332-18913352	pool1	chr1	18913332	18913352	3.856	-0.165	-0.025	0.987401	FALSE	FALSE
SIDV3-Region_chr1:18913408-18913428	pool1	chr1	18913408	18913428	3.768	0.108	0.176	0.847038	FALSE	FALSE
SIDV3-Region_chr1:18918394-18918414	pool1	chr1	18918394	18918414	4.103	-0.101	-0.122	0.892289	FALSE	FALSE
SIDV3-Region_chr1:18918514-18918534	pool1	chr1	18918514	18918534	3.665	0.252	0.002	0.998957	FALSE	FALSE
SIDV3-Region_chr1:18918605-18918625	pool1	chr1	18918605	18918625	3.616	-0.256	-0.193	0.838271	FALSE	FALSE
SIDV3-Region_chr1:18918727-18918747	pool1	chr1	18918727	18918747	4.299	0.336	0.239	0.770096	FALSE	FALSE
SIDV3-Region_chr1:18918800-18918820	pool1	chr1	18918800	18918820	2.524	-0.677	-0.127	0.949778	FALSE	FALSE
SIDV3-CAGE_chr1:18956387-18956407	pool1	chr1	18956387	18956407	3.781	-0.093	-0.044	0.976789	FALSE	FALSE
SIDV3-CAGE_chr1:18956454-18956474	pool1	chr1	18956454	18956474	4.514	-0.242	-0.147	0.837726	FALSE	FALSE
SIDV3-CAGE_chr1:18956537-18956557	pool1	chr1	18956537	18956557	4.328	0.095	0.008	0.995043	FALSE	FALSE
SIDV3-CAGE_chr1:18956592-18956612	pool1	chr1	18956592	18956612	3.815	-0.017	-0.006	0.996802	FALSE	FALSE
SIDV3-CAGE_chr1:18956749-18956769	pool1	chr1	18956749	18956769	4.158	-0.019	-0.127	0.891847	FALSE	FALSE
SIDV3-Region_chr1:19241183-19241203	pool1	chr1	19241183	19241203	2.716	-0.085	0.063	0.972405	FALSE	FALSE
SIDV3-Region_chr1:19241257-19241277	pool1	chr1	19241257	19241277	4.215	0.315	0.1	0.92404	FALSE	FALSE
SIDV3-Region_chr1:19241365-19241385	pool1	chr1	19241365	19241385	4.214	0.454	0.312	0.628493	FALSE	FALSE
SIDV3-CAGE_chr1:19312239-19312259	pool1	chr1	19312239	19312259	4.176	-0.067	-0.072	0.950431	FALSE	FALSE
SIDV3-CAGE_chr1:19312311-19312331	pool1	chr1	19312311	19312331	3.929	0.105	0.193	0.815904	FALSE	FALSE
SIDV3-CAGE_chr1:19312375-19312395	pool1	chr1	19312375	19312395	3.265	-0.533	-0.433	0.526321	FALSE	FALSE
SIDV3-CAGE_chr1:19312440-19312460	pool1	chr1	19312440	19312460	4.795	-0.078	-0.081	0.924535	FALSE	FALSE
SIDV3-Region_chr1:19312529-19312549	pool1	chr1	19312529	19312549	4.239	0.306	0.206	0.773621	FALSE	FALSE
SIDV3-Region_chr1:19312616-19312636	pool1	chr1	19312616	19312636	3.076	0.441	0.22	0.841684	FALSE	FALSE
SIDV3-Region_chr1:19312719-19312739	pool1	chr1	19312719	19312739	4.361	-0.173	0.045	0.970503	FALSE	FALSE
SIDV3-Region_chr1:19312869-19312889	pool1	chr1	19312869	19312889	3.995	-0.064	-0.087	0.932815	FALSE	FALSE
SIDV3-Region_chr1:19312950-19312970	pool1	chr1	19312950	19312970	4.221	-0.246	0.003	0.998293	FALSE	FALSE
SIDV3-Region_chr1:19317494-19317514	pool1	chr1	19317494	19317514	2.688	0.038	-0.065	0.974309	FALSE	FALSE
SIDV3-Region_chr1:19317591-19317611	pool1	chr1	19317591	19317611	3.131	0.375	0.226	0.844963	FALSE	FALSE
SIDV3-Region_chr1:19317748-19317768	pool1	chr1	19317748	19317768	4.381	0.113	0.122	0.894894	FALSE	FALSE
SIDV3-Region_chr1:19317837-19317857	pool1	chr1	19317837	19317857	3.828	0.177	0.264	0.717612	FALSE	FALSE
SIDV3-Region_chr1:19317895-19317915	pool1	chr1	19317895	19317915	4.274	0.204	0.125	0.89208	FALSE	FALSE
SIDV3-Region_chr1:19391292-19391312	pool1	chr1	19391292	19391312	4.328	0.38	0.428	0.279162	FALSE	FALSE
SIDV3-Region_chr1:19391449-19391469	pool1	chr1	19391449	19391469	4.176	0.316	0.266	0.654683	FALSE	FALSE
SIDV3-Region_chr1:19391680-19391700	pool1	chr1	19391680	19391700	4.242	0.148	0.184	0.810474	FALSE	FALSE
SIDV3-Region_chr1:19393029-19393049	pool1	chr1	19393029	19393049	3.61	-0.035	-0.137	0.901087	FALSE	FALSE
SIDV3-Region_chr1:19393103-19393123	pool1	chr1	19393103	19393123	2.977	0.063	0.184	0.886824	FALSE	FALSE
SIDV3-Region_chr1:19393227-19393247	pool1	chr1	19393227	19393247	4.029	-0.188	-0.159	0.853529	FALSE	FALSE
SIDV3-Region_chr1:19393326-19393346	pool1	chr1	19393326	19393346	3.108	-0.347	0.108	0.944197	FALSE	FALSE
SIDV3-Region_chr1:19393402-19393422	pool1	chr1	19393402	19393422	3.627	-0.101	-0.145	0.897634	FALSE	FALSE
SIDV3-Region_chr1:19393510-19393530	pool1	chr1	19393510	19393530	3.618	-0.063	0.045	0.980034	FALSE	FALSE
SIDV3-Region_chr1:19393593-19393613	pool1	chr1	19393593	19393613	3.738	-0.023	-0.034	0.982074	FALSE	FALSE
SIDV3-Region_chr1:19414935-19414955	pool1	chr1	19414935	19414955	4.359	0.52	0.659	0.0159182	FALSE	TRUE
SIDV3-Region_chr1:19415074-19415094	pool1	chr1	19415074	19415094	3.385	0.385	0.093	0.953382	FALSE	FALSE
SIDV3-Region_chr1:19415234-19415254	pool1	chr1	19415234	19415254	3.099	0.423	0.366	0.699606	FALSE	FALSE
SIDV3-CAGE_chr1:19485247-19485267	pool1	chr1	19485247	19485267	4.424	-0.071	0.143	0.870449	FALSE	FALSE
SIDV3-CAGE_chr1:19485337-19485357	pool1	chr1	19485337	19485357	3.98	-0.029	0.062	0.96007	FALSE	FALSE
SIDV3-CAGE_chr1:19485420-19485440	pool1	chr1	19485420	19485440	3.748	0.103	0.235	0.763103	FALSE	FALSE
SIDV3-CAGE_chr1:19644236-19644256	pool1	chr1	19644236	19644256	3.971	-0.042	0.225	0.771234	FALSE	FALSE
SIDV3-CAGE_chr1:19644300-19644320	pool1	chr1	19644300	19644320	4.027	0.111	0.223	0.78487	FALSE	FALSE
SIDV3-CAGE_chr1:19644372-19644392	pool1	chr1	19644372	19644392	3.95	-0.012	0.074	0.950241	FALSE	FALSE
SIDV3-CAGE_chr1:19644481-19644501	pool1	chr1	19644481	19644501	4.096	-0.196	-0.364	0.485583	FALSE	FALSE
SIDV3-Region_chr1:19651049-19651069	pool1	chr1	19651049	19651069	3.866	-0.08	0.19	0.829171	FALSE	FALSE
SIDV3-Region_chr1:19651182-19651202	pool1	chr1	19651182	19651202	3.775	0.759	0.612	0.113265	FALSE	FALSE
SIDV3-Region_chr1:19651250-19651270	pool1	chr1	19651250	19651270	4.592	0.315	0.044	0.96926	FALSE	FALSE
SIDV3-Region_chr1:19651417-19651437	pool1	chr1	19651417	19651437	3.141	0.197	0.357	0.736587	FALSE	FALSE
SIDV3-Region_chr1:19653689-19653709	pool1	chr1	19653689	19653709	4.147	0.194	0.257	0.68881	FALSE	FALSE
SIDV3-Region_chr1:19653771-19653791	pool1	chr1	19653771	19653791	3.737	0.19	0.32	0.692241	FALSE	FALSE
SIDV3-Region_chr1:19653901-19653921	pool1	chr1	19653901	19653921	3.235	-0.295	-0.069	0.963911	FALSE	FALSE
SIDV3-Region_chr1:19653965-19653985	pool1	chr1	19653965	19653985	3.201	-0.369	-0.152	0.899198	FALSE	FALSE
SIDV3-Region_chr1:19654016-19654036	pool1	chr1	19654016	19654036	3.989	0.531	0.229	0.787124	FALSE	FALSE
SIDV3-Region_chr1:19659797-19659817	pool1	chr1	19659797	19659817	3.216	0.034	-0.009	0.99583	FALSE	FALSE
SIDV3-Region_chr1:19659875-19659895	pool1	chr1	19659875	19659895	3.368	-0.231	-0.256	0.775988	FALSE	FALSE
SIDV3-Region_chr1:19659965-19659985	pool1	chr1	19659965	19659985	3.955	0.319	0.148	0.870706	FALSE	FALSE
SIDV3-Region_chr1:19660043-19660063	pool1	chr1	19660043	19660063	4.372	0.203	0.123	0.884084	FALSE	FALSE
SIDV3-Region_chr1:19665146-19665166	pool1	chr1	19665146	19665166	3.763	-0.168	0.066	0.959053	FALSE	FALSE
SIDV3-Region_chr1:19665239-19665259	pool1	chr1	19665239	19665259	3.683	-0.101	-0.095	0.936203	FALSE	FALSE
SIDV3-Region_chr1:19665320-19665340	pool1	chr1	19665320	19665340	3.202	0.256	0.285	0.753693	FALSE	FALSE
SIDV3-Region_chr1:19665431-19665451	pool1	chr1	19665431	19665451	4.179	0.438	0.515	0.24871	FALSE	FALSE
SIDV3-Region_chr1:19665524-19665544	pool1	chr1	19665524	19665544	4.463	-0.023	0.011	0.993107	FALSE	FALSE
SIDV3-Region_chr1:19665577-19665597	pool1	chr1	19665577	19665597	3.44	-0.364	-0.29	0.739982	FALSE	FALSE
SIDV3-Region_chr1:19666063-19666083	pool1	chr1	19666063	19666083	4.079	0.093	0.195	0.805456	FALSE	FALSE
SIDV3-Region_chr1:19666124-19666144	pool1	chr1	19666124	19666144	4.075	0.513	0.511	0.274299	FALSE	FALSE
SIDV3-Region_chr1:19666175-19666195	pool1	chr1	19666175	19666195	3.935	-0.638	-0.52	0.20957	FALSE	FALSE
SIDV3-Region_chr1:19666238-19666258	pool1	chr1	19666238	19666258	4.243	-0.096	-0.185	0.798719	FALSE	FALSE
SIDV3-Region_chr1:19666353-19666373	pool1	chr1	19666353	19666373	4.209	0.178	-0.036	0.977143	FALSE	FALSE
SIDV3-Region_chr1:19675590-19675610	pool1	chr1	19675590	19675610	3.746	0.344	0.248	0.745396	FALSE	FALSE
SIDV3-Region_chr1:19675645-19675665	pool1	chr1	19675645	19675665	2.98	-0.157	0	0.999823	FALSE	FALSE
SIDV3-Region_chr1:19675861-19675881	pool1	chr1	19675861	19675881	3.488	0.317	-0.088	0.95396	FALSE	FALSE
SIDV3-Region_chr1:19690299-19690319	pool1	chr1	19690299	19690319	4.134	0.13	0.066	0.952449	FALSE	FALSE
SIDV3-Region_chr1:19690499-19690519	pool1	chr1	19690499	19690519	4.152	0.075	0.035	0.98021	FALSE	FALSE
[truncated: 134,097 more rows]

## Sheet: S4.3
chrom	start	end	gene	gene_TSS_distance	ENHANCER	CTCF	PROMOTER	n_guides	Exhausted_n_guides	Exhausted_frac	Exhausted_best_log2FC	Exhausted_best_fdr	Exhausted_significant	Expanded_n_guides	Expanded_frac	Expanded_best_log2FC	Expanded_best_fdr	Expanded_significant
chr1	923346	924740	LOC107985728	894	1	0	0	14	0	0	NA	NA	FALSE	0	0	NA	NA	FALSE
chr1	952547	952738	NOC2L	6657	1	0	0	3	0	0	NA	NA	FALSE	0	0	NA	NA	FALSE
chr1	958959	959359	NOC2L	0	0	0	1	4	0	0	NA	NA	FALSE	0	0	NA	NA	FALSE
chr1	995751	996307	HES4	4143	1	0	0	7	0	0	NA	NA	FALSE	0	0	NA	NA	FALSE
chr1	998447	999730	HES4	1084	1	0	0	18	0	0	NA	NA	FALSE	1	0.056	0.909	0.000914039	TRUE
chr1	999751	1000151	HES4	0	0	0	1	1	0	0	NA	NA	FALSE	0	0	NA	NA	FALSE
chr1	999864	1000172	HES4	154	1	0	0	10	0	0	NA	NA	FALSE	0	0	NA	NA	FALSE
chr1	1080968	1081457	RNF223	-6905	1	0	0	4	0	0	NA	NA	FALSE	0	0	NA	NA	FALSE
chr1	1121335	1122771	C1orf159	-5697	1	0	0	19	0	0	NA	NA	FALSE	0	0	NA	NA	FALSE
chr1	1122843	1123472	C1orf159	-6801	1	0	0	10	0	0	NA	NA	FALSE	0	0	NA	NA	FALSE
chr1	1142471	1142795	LINC01342	5617	1	0	0	6	0	0	NA	NA	FALSE	1	0.167	0.727	0.0178865	TRUE
chr1	1143295	1143509	LINC01342	6386	1	0	0	5	0	0	NA	NA	FALSE	1	0.2	0.727	0.0178865	TRUE
chr1	1143933	1144953	LINC01342	7427	1	0	0	14	0	0	NA	NA	FALSE	0	0	NA	NA	FALSE
chr1	1145090	1145454	LINC01342	8256	1	0	0	9	0	0	NA	NA	FALSE	0	0	NA	NA	FALSE
chr1	1156113	1156823	MIR200B	-10635	1	0	0	8	0	0	NA	NA	FALSE	0	0	NA	NA	FALSE
chr1	1156972	1158942	MIR200B	-9146	1	0	0	22	0	0	NA	NA	FALSE	0	0	NA	NA	FALSE
chr1	1162446	1163852	MIR200B	-3954	1	0	0	14	0	0	NA	NA	FALSE	0	0	NA	NA	FALSE
chr1	1164579	1165226	MIR200B	-2201	1	0	0	11	0	0	NA	NA	FALSE	0	0	NA	NA	FALSE
chr1	1165251	1165477	MIR200B	-1739	1	0	0	10	0	0	NA	NA	FALSE	0	0	NA	NA	FALSE
chr1	1284012	1284130	SCNN1D	74	0	1	0	4	0	0	NA	NA	FALSE	0	0	NA	NA	FALSE
chr1	1284919	1285037	SCNN1D	981	0	1	0	6	0	0	NA	NA	FALSE	0	0	NA	NA	FALSE
chr1	1286432	1286550	SCNN1D	2494	0	1	0	6	0	0	NA	NA	FALSE	0	0	NA	NA	FALSE
chr1	1290281	1290399	MIR6726	5830	0	1	0	4	0	0	NA	NA	FALSE	0	0	NA	NA	FALSE
chr1	1291968	1292086	MIR6726	4143	0	1	0	5	0	0	NA	NA	FALSE	0	0	NA	NA	FALSE
chr1	1300525	1300643	ACAP3	-2471	0	1	0	4	0	0	NA	NA	FALSE	0	0	NA	NA	FALSE
chr1	1302066	1302184	ACAP3	-4012	0	1	0	1	0	0	NA	NA	FALSE	0	0	NA	NA	FALSE
chr1	1302840	1302958	ACAP3	4346	0	1	0	6	0	0	NA	NA	FALSE	0	0	NA	NA	FALSE
chr1	1305341	1305459	ACAP3	1845	0	1	0	3	0	0	NA	NA	FALSE	0	0	NA	NA	FALSE
chr1	1306217	1306335	ACAP3	969	0	1	0	4	0	0	NA	NA	FALSE	0	0	NA	NA	FALSE
chr1	1307605	1308005	ACAP3	0	0	0	1	4	0	0	NA	NA	FALSE	0	0	NA	NA	FALSE
chr1	1308461	1308688	PUSL1	11	0	1	0	5	0	0	NA	NA	FALSE	0	0	NA	NA	FALSE
chr1	1308519	1308919	PUSL1	0	0	0	1	2	0	0	NA	NA	FALSE	0	0	NA	NA	FALSE
chr1	1310137	1310255	PUSL1	1583	0	1	0	3	0	0	NA	NA	FALSE	0	0	NA	NA	FALSE
chr1	1312929	1313047	MIR6727	-422	0	1	0	5	0	0	NA	NA	FALSE	0	0	NA	NA	FALSE
chr1	1324357	1324757	CPSF3L	0	0	0	1	5	0	0	NA	NA	FALSE	0	0	NA	NA	FALSE
chr1	1332279	1332397	TAS1R3	993	0	1	0	4	0	0	NA	NA	FALSE	0	0	NA	NA	FALSE
chr1	1344119	1344237	MIR6808	-4470	0	1	0	3	0	0	NA	NA	FALSE	0	0	NA	NA	FALSE
chr1	1349098	1349498	DVL1	0	0	0	1	4	0	0	NA	NA	FALSE	0	0	NA	NA	FALSE
chr1	1349900	1350018	DVL1	-817	0	1	0	3	0	0	NA	NA	FALSE	0	0	NA	NA	FALSE
chr1	1354785	1354903	MXRA8	3703	0	1	0	5	0	0	NA	NA	FALSE	0	0	NA	NA	FALSE
chr1	1362092	1362210	MXRA8	-374	0	1	0	5	0	0	NA	NA	FALSE	0	0	NA	NA	FALSE
chr1	1364332	1364450	MXRA8	-850	0	1	0	4	0	0	NA	NA	FALSE	0	0	NA	NA	FALSE
chr1	1372174	1372292	AURKAIP1	2552	0	1	0	3	0	0	NA	NA	FALSE	0	0	NA	NA	FALSE
chr1	1374215	1375182	AURKAIP1	87	1	0	0	15	0	0	NA	NA	FALSE	0	0	NA	NA	FALSE
chr1	1375208	1375326	AURKAIP1	-67	0	1	0	9	0	0	NA	NA	FALSE	0	0	NA	NA	FALSE
chr1	1376456	1376574	AURKAIP1	-1077	0	1	0	6	0	0	NA	NA	FALSE	0	0	NA	NA	FALSE
chr1	1384000	1384118	AURKAIP1	-8621	0	1	0	5	0	0	NA	NA	FALSE	0	0	NA	NA	FALSE
chr1	1390709	1390827	CCNL2	7536	0	1	0	3	0	0	NA	NA	FALSE	0	0	NA	NA	FALSE
chr1	1399023	1399423	CCNL2	0	0	0	1	6	0	0	NA	NA	FALSE	0	0	NA	NA	FALSE
chr1	1536665	1536875	TMEM240	3590	1	0	0	4	0	0	NA	NA	FALSE	0	0	NA	NA	FALSE
chr1	1781193	1781510	NADK	-837	1	0	0	3	0	0	NA	NA	FALSE	0	0	NA	NA	FALSE
chr1	1781602	1781887	NADK	-1230	1	0	0	6	0	0	NA	NA	FALSE	0	0	NA	NA	FALSE
chr1	1782086	1783325	NADK	-2191	1	0	0	13	0	0	NA	NA	FALSE	0	0	NA	NA	FALSE
chr1	1889991	1890109	GNB1	841	0	1	0	5	0	0	NA	NA	FALSE	0	0	NA	NA	FALSE
chr1	1890794	1891194	GNB1	0	0	0	1	4	0	0	NA	NA	FALSE	0	0	NA	NA	FALSE
chr1	1899303	1899421	LOC105378949	7831	0	1	0	6	0	0	NA	NA	FALSE	0	0	NA	NA	FALSE
chr1	1906356	1906474	CALML6	-7335	0	1	0	3	0	0	NA	NA	FALSE	0	0	NA	NA	FALSE
chr1	1907343	1907461	CALML6	-6348	0	1	0	3	0	0	NA	NA	FALSE	0	0	NA	NA	FALSE
chr1	1909079	1909197	CALML6	-4612	0	1	0	7	0	0	NA	NA	FALSE	0	0	NA	NA	FALSE
chr1	1918974	1919374	TMEM52	0	0	0	1	1	0	0	NA	NA	FALSE	0	0	NA	NA	FALSE
chr1	1919030	1919148	TMEM52	212	0	1	0	5	1	0.2	-1.297	3.17748e-06	TRUE	0	0	NA	NA	FALSE
chr1	1923734	1923852	TMEM52	-4492	0	1	0	7	1	0.143	-0.376	0.623666	TRUE	0	0	NA	NA	FALSE
chr1	1941818	1941936	CFAP74	4514	0	1	0	5	0	0	NA	NA	FALSE	0	0	NA	NA	FALSE
chr1	1944110	1944228	CFAP74	2222	0	1	0	3	0	0	NA	NA	FALSE	0	0	NA	NA	FALSE
chr1	1955328	1955446	LOC107984872	-469	0	1	0	7	0	0	NA	NA	FALSE	0	0	NA	NA	FALSE
chr1	1955719	1955837	LOC107984872	-78	0	1	0	8	0	0	NA	NA	FALSE	0	0	NA	NA	FALSE
chr1	2049270	2049469	LOC105378591	701	1	0	0	5	0	0	NA	NA	FALSE	0	0	NA	NA	FALSE
chr1	2374091	2374209	RER1	-17163	0	1	0	4	0	0	NA	NA	FALSE	0	0	NA	NA	FALSE
chr1	2381322	2381440	RER1	-9932	0	1	0	9	0	0	NA	NA	FALSE	0	0	NA	NA	FALSE
chr1	2381865	2381983	RER1	-9389	0	1	0	7	0	0	NA	NA	FALSE	0	0	NA	NA	FALSE
chr1	2385054	2385172	RER1	-6200	0	1	0	5	0	0	NA	NA	FALSE	0	0	NA	NA	FALSE
chr1	2391250	2391650	MORN1	0	0	0	1	5	0	0	NA	NA	FALSE	0	0	NA	NA	FALSE
chr1	2391744	2392144	RER1	0	0	0	1	5	0	0	NA	NA	FALSE	0	0	NA	NA	FALSE
chr1	2391757	2391875	RER1	4	0	1	0	6	0	0	NA	NA	FALSE	0	0	NA	NA	FALSE
chr1	2408656	2408774	PLCH2	-3765	0	1	0	5	0	0	NA	NA	FALSE	0	0	NA	NA	FALSE
chr1	2411907	2412571	PLCH2	-241	0	1	0	9	0	0	NA	NA	FALSE	0	0	NA	NA	FALSE
chr1	2412245	2412645	PEX10	0	0	0	1	2	0	0	NA	NA	FALSE	0	0	NA	NA	FALSE
chr1	2413179	2413297	PEX10	-616	0	1	0	5	0	0	NA	NA	FALSE	0	0	NA	NA	FALSE
chr1	2414503	2414621	PLCH2	-1345	0	1	0	4	1	0.25	-0.722	0.0587533	TRUE	0	0	NA	NA	FALSE
chr1	2415601	2415719	PLCH2	-247	0	1	0	8	0	0	NA	NA	FALSE	0	0	NA	NA	FALSE
chr1	2416047	2416165	PLCH2	199	0	1	0	7	0	0	NA	NA	FALSE	0	0	NA	NA	FALSE
chr1	2430180	2430298	PLCH2	2602	0	1	0	3	0	0	NA	NA	FALSE	0	0	NA	NA	FALSE
chr1	2527994	2528459	PANK4	-1598	1	0	0	4	0	0	NA	NA	FALSE	0	0	NA	NA	FALSE
chr1	2528975	2529783	HES5	866	1	0	0	9	1	0.111	-1.128	0.000108978	TRUE	0	0	NA	NA	FALSE
chr1	2543125	2543341	TNFRSF14	-12533	1	0	0	8	0	0	NA	NA	FALSE	0	0	NA	NA	FALSE
chr1	2543517	2545211	TNFRSF14	-11402	1	0	0	21	0	0	NA	NA	FALSE	0	0	NA	NA	FALSE
chr1	2556364	2557011	TNFRSF14	99	1	0	0	7	0	0	NA	NA	FALSE	0	0	NA	NA	FALSE
chr1	2592591	2592991	MMEL1	0	0	0	1	2	0	0	NA	NA	FALSE	0	0	NA	NA	FALSE
chr1	2592657	2593157	FAM213B	6126	1	0	0	3	0	0	NA	NA	FALSE	0	0	NA	NA	FALSE
chr1	2593914	2594599	FAM213B	7475	1	0	0	5	0	0	NA	NA	FALSE	0	0	NA	NA	FALSE
chr1	3531111	3531511	MEGF6	0	0	0	1	5	0	0	NA	NA	FALSE	0	0	NA	NA	FALSE
chr1	3583904	3584164	LOC105378607	-18860	1	0	0	4	0	0	NA	NA	FALSE	0	0	NA	NA	FALSE
chr1	3649522	3650107	WRAP73	288	1	0	0	7	0	0	NA	NA	FALSE	0	0	NA	NA	FALSE
chr1	3652418	3652818	TP73	0	0	0	1	4	0	0	NA	NA	FALSE	0	0	NA	NA	FALSE
chr1	3668936	3669054	LOC105378610	-3582	0	1	0	4	0	0	NA	NA	FALSE	0	0	NA	NA	FALSE
chr1	3672443	3672561	LOC105378609	5137	0	1	0	7	0	0	NA	NA	FALSE	0	0	NA	NA	FALSE
chr1	3672706	3672829	LOC105378609	4872	1	0	0	11	1	0.091	-0.744	0.00338944	TRUE	0	0	NA	NA	FALSE
chr1	3673239	3673357	LOC105378609	4341	0	1	0	9	1	0.111	-0.744	0.00338944	TRUE	0	0	NA	NA	FALSE
chr1	3677195	3677313	LOC105378609	385	0	1	0	4	0	0	NA	NA	FALSE	0	0	NA	NA	FALSE
chr1	3678394	3678512	LOC105378609	-814	0	1	0	5	0	0	NA	NA	FALSE	0	0	NA	NA	FALSE
chr1	3688532	3688650	TP73	-2080	0	1	0	6	0	0	NA	NA	FALSE	0	0	NA	NA	FALSE
chr1	3689988	3690106	TP73	-624	0	1	0	6	0	0	NA	NA	FALSE	0	0	NA	NA	FALSE
chr1	3695741	3695859	TP73	-2245	0	1	0	4	0	0	NA	NA	FALSE	0	0	NA	NA	FALSE
chr1	3698762	3698880	TP73	776	0	1	0	7	0	0	NA	NA	FALSE	0	0	NA	NA	FALSE
chr1	3699072	3699190	TP73	1086	0	1	0	7	0	0	NA	NA	FALSE	0	0	NA	NA	FALSE
chr1	3703111	3703229	TP73	5125	0	1	0	3	0	0	NA	NA	FALSE	0	0	NA	NA	FALSE
chr1	3708147	3708265	TP73	10161	0	1	0	5	0	0	NA	NA	FALSE	0	0	NA	NA	FALSE
chr1	3709143	3709261	TP73	11157	0	1	0	5	0	0	NA	NA	FALSE	1	0.2	0.652	0.0122143	TRUE
chr1	3714435	3714748	TP73	16546	1	0	0	5	0	0	NA	NA	FALSE	0	0	NA	NA	FALSE
chr1	3717559	3717677	TP73	19573	0	1	0	5	0	0	NA	NA	FALSE	0	0	NA	NA	FALSE
chr1	3718879	3718997	TP73	20893	0	1	0	5	0	0	NA	NA	FALSE	0	0	NA	NA	FALSE
chr1	3727352	3727470	TP73-AS1	19360	0	1	0	5	0	0	NA	NA	FALSE	0	0	NA	NA	FALSE
chr1	3732660	3732778	TP73-AS1	14052	0	1	0	3	0	0	NA	NA	FALSE	0	0	NA	NA	FALSE
chr1	3741850	3741968	TP73-AS1	4862	0	1	0	4	0	0	NA	NA	FALSE	0	0	NA	NA	FALSE
chr1	3756480	3756598	CCDC27	3828	0	1	0	4	0	0	NA	NA	FALSE	0	0	NA	NA	FALSE
chr1	3762400	3762518	CCDC27	9748	0	1	0	6	0	0	NA	NA	FALSE	0	0	NA	NA	FALSE
chr1	3815030	3815148	LRRC47	-18585	0	1	0	4	0	0	NA	NA	FALSE	0	0	NA	NA	FALSE
chr1	3827854	3827972	DFFB	-29229	0	1	0	3	0	0	NA	NA	FALSE	0	0	NA	NA	FALSE
chr1	3856906	3857306	CEP104	0	0	0	1	5	0	0	NA	NA	FALSE	0	0	NA	NA	FALSE
chr1	3857372	3857772	DFFB	0	0	0	1	5	0	0	NA	NA	FALSE	0	0	NA	NA	FALSE
chr1	3857501	3857619	DFFB	101	0	1	0	6	0	0	NA	NA	FALSE	0	0	NA	NA	FALSE
chr1	3858231	3858349	DFFB	831	0	1	0	6	0	0	NA	NA	FALSE	0	0	NA	NA	FALSE
chr1	3858921	3859039	DFFB	1521	0	1	0	4	0	0	NA	NA	FALSE	0	0	NA	NA	FALSE
chr1	3870013	3870131	DFFB	-3224	0	1	0	6	0	0	NA	NA	FALSE	0	0	NA	NA	FALSE
chr1	4563831	4563949	LOC105376679	-7623	0	1	0	4	0	0	NA	NA	FALSE	1	0.25	0.732	0.00359968	TRUE
chr1	4585336	4585454	LOC105376679	13882	0	1	0	5	0	0	NA	NA	FALSE	0	0	NA	NA	FALSE
chr1	4594470	4594588	LOC107985376	-9158	0	1	0	3	0	0	NA	NA	FALSE	0	0	NA	NA	FALSE
chr1	4627484	4627602	LOC107985376	23856	0	1	0	5	0	0	NA	NA	FALSE	0	0	NA	NA	FALSE
chr1	5980160	5980278	NPHP4	-1862	0	1	0	7	0	0	NA	NA	FALSE	0	0	NA	NA	FALSE
chr1	5980497	5980615	NPHP4	-2199	0	1	0	7	0	0	NA	NA	FALSE	0	0	NA	NA	FALSE
chr1	5992142	5992542	NPHP4	0	0	0	1	4	0	0	NA	NA	FALSE	0	0	NA	NA	FALSE
chr1	5992297	5992473	NPHP4	-52	0	1	0	7	0	0	NA	NA	FALSE	0	0	NA	NA	FALSE
chr1	5992582	5992982	KCNAB2	0	0	0	1	4	0	0	NA	NA	FALSE	0	0	NA	NA	FALSE
chr1	5994721	5994839	KCNAB2	2061	0	1	0	6	0	0	NA	NA	FALSE	0	0	NA	NA	FALSE
chr1	5995401	5995519	KCNAB2	2741	0	1	0	6	0	0	NA	NA	FALSE	0	0	NA	NA	FALSE
chr1	6001460	6001578	KCNAB2	8800	0	1	0	4	0	0	NA	NA	FALSE	0	0	NA	NA	FALSE
chr1	6003150	6003268	KCNAB2	10490	0	1	0	3	0	0	NA	NA	FALSE	0	0	NA	NA	FALSE
chr1	6005671	6005789	KCNAB2	13011	0	1	0	4	0	0	NA	NA	FALSE	0	0	NA	NA	FALSE
chr1	6026034	6026152	KCNAB2	81	0	1	0	3	0	0	NA	NA	FALSE	0	0	NA	NA	FALSE
chr1	6028707	6028825	KCNAB2	2467	0	1	0	6	0	0	NA	NA	FALSE	0	0	NA	NA	FALSE
chr1	6035821	6035939	KCNAB2	1593	0	1	0	5	0	0	NA	NA	FALSE	0	0	NA	NA	FALSE
chr1	6041575	6041693	KCNAB2	-4286	0	1	0	4	0	0	NA	NA	FALSE	0	0	NA	NA	FALSE
chr1	6048198	6048316	KCNAB2	2144	0	1	0	5	0	0	NA	NA	FALSE	0	0	NA	NA	FALSE
chr1	6053046	6053164	KCNAB2	6992	0	1	0	3	0	0	NA	NA	FALSE	0	0	NA	NA	FALSE
chr1	6161638	6161892	CHD5	18369	1	0	0	7	0	0	NA	NA	FALSE	0	0	NA	NA	FALSE
chr1	6180010	6180410	CHD5	0	0	0	1	4	0	0	NA	NA	FALSE	0	0	NA	NA	FALSE
chr1	6180426	6180544	CHD5	-351	0	1	0	7	0	0	NA	NA	FALSE	0	0	NA	NA	FALSE
chr1	6180901	6181019	CHD5	-826	0	1	0	7	0	0	NA	NA	FALSE	0	0	NA	NA	FALSE
chr1	6183617	6183735	CHD5	-3542	0	1	0	5	0	0	NA	NA	FALSE	0	0	NA	NA	FALSE
chr1	6185921	6186039	CHD5	-5846	0	1	0	3	0	0	NA	NA	FALSE	0	0	NA	NA	FALSE
chr1	6199305	6199705	RPL22	0	0	0	1	3	0	0	NA	NA	FALSE	1	0.333	0.805	0.00019543	TRUE
chr1	6205321	6205439	RNF207	-94	0	1	0	4	0	0	NA	NA	FALSE	0	0	NA	NA	FALSE
chr1	6206010	6206410	RNF207	0	0	0	1	5	0	0	NA	NA	FALSE	0	0	NA	NA	FALSE
chr1	6210764	6210882	LOC107985733	-1484	0	1	0	5	0	0	NA	NA	FALSE	0	0	NA	NA	FALSE
chr1	6227327	6227445	ICMT	7075	0	1	0	3	0	0	NA	NA	FALSE	0	0	NA	NA	FALSE
chr1	6235677	6236077	ICMT	0	0	0	1	5	0	0	NA	NA	FALSE	0	0	NA	NA	FALSE
chr1	6238761	6238879	LINC00337	2581	0	1	0	3	0	0	NA	NA	FALSE	0	0	NA	NA	FALSE
chr1	6245167	6245285	HES3	1035	0	1	0	4	1	0.25	-0.559	0.449272	TRUE	0	0	NA	NA	FALSE
chr1	6246837	6246955	HES3	2705	0	1	0	5	0	0	NA	NA	FALSE	0	0	NA	NA	FALSE
chr1	6249374	6249492	HES3	5242	0	1	0	5	0	0	NA	NA	FALSE	0	0	NA	NA	FALSE
chr1	6252715	6252833	GPR153	2477	0	1	0	5	0	0	NA	NA	FALSE	0	0	NA	NA	FALSE
chr1	6260782	6261182	GPR153	0	0	0	1	5	0	0	NA	NA	FALSE	0	0	NA	NA	FALSE
chr1	6331837	6332045	ACOT7	27003	1	0	0	3	0	0	NA	NA	FALSE	0	0	NA	NA	FALSE
chr1	6393076	6393476	ACOT7	0	0	0	1	5	0	0	NA	NA	FALSE	0	0	NA	NA	FALSE
chr1	6423568	6423686	ESPN	-1148	0	1	0	4	0	0	NA	NA	FALSE	0	0	NA	NA	FALSE
chr1	6424676	6425076	ESPN	0	0	0	1	6	0	0	NA	NA	FALSE	0	0	NA	NA	FALSE
chr1	6438142	6438260	ESPN	1512	0	1	0	3	0	0	NA	NA	FALSE	0	0	NA	NA	FALSE
chr1	6441707	6441825	ESPN	5077	0	1	0	4	0	0	NA	NA	FALSE	0	0	NA	NA	FALSE
chr1	6447473	6447591	ESPN	-2985	0	1	0	1	0	0	NA	NA	FALSE	0	0	NA	NA	FALSE
chr1	6448274	6448392	ESPN	-2184	0	1	0	5	0	0	NA	NA	FALSE	0	0	NA	NA	FALSE
chr1	6448833	6448951	ESPN	-1625	0	1	0	3	0	0	NA	NA	FALSE	0	0	NA	NA	FALSE
chr1	6455124	6455242	ESPN	4666	0	1	0	4	0	0	NA	NA	FALSE	0	0	NA	NA	FALSE
chr1	6456451	6456569	ESPN	5993	0	1	0	4	0	0	NA	NA	FALSE	0	0	NA	NA	FALSE
chr1	6456922	6457040	ESPN	6464	0	1	0	3	0	0	NA	NA	FALSE	0	0	NA	NA	FALSE
chr1	6462535	6462653	TNFRSF25	3601	0	1	0	5	0	0	NA	NA	FALSE	0	0	NA	NA	FALSE
chr1	6464653	6464771	TNFRSF25	1483	0	1	0	6	0	0	NA	NA	FALSE	0	0	NA	NA	FALSE
chr1	6471153	6471271	TNFRSF25	-5017	0	1	0	6	0	0	NA	NA	FALSE	0	0	NA	NA	FALSE
chr1	6471281	6471681	PLEKHG5	0	0	0	1	3	0	0	NA	NA	FALSE	0	0	NA	NA	FALSE
chr1	6472534	6472652	TNFRSF25	-6398	0	1	0	3	0	0	NA	NA	FALSE	0	0	NA	NA	FALSE
chr1	6475623	6475741	TNFRSF25	-9487	0	1	0	4	0	0	NA	NA	FALSE	0	0	NA	NA	FALSE
chr1	6480926	6481044	PLEKHG5	4484	0	1	0	3	0	0	NA	NA	FALSE	0	0	NA	NA	FALSE
chr1	6483145	6483263	PLEKHG5	2265	0	1	0	3	0	0	NA	NA	FALSE	0	0	NA	NA	FALSE
chr1	6484551	6484669	PLEKHG5	859	0	1	0	5	0	0	NA	NA	FALSE	0	0	NA	NA	FALSE
chr1	6486586	6486704	PLEKHG5	-691	0	1	0	4	0	0	NA	NA	FALSE	0	0	NA	NA	FALSE
chr1	6489988	6490106	PLEKHG5	533	0	1	0	6	0	0	NA	NA	FALSE	0	0	NA	NA	FALSE
chr1	6579913	6580313	ZBTB48	0	0	0	1	4	0	0	NA	NA	FALSE	0	0	NA	NA	FALSE
chr1	6588236	6588523	ZBTB48	8373	1	0	0	4	0	0	NA	NA	FALSE	0	0	NA	NA	FALSE
chr1	6625089	6625489	THAP3	0	0	0	1	4	0	0	NA	NA	FALSE	0	0	NA	NA	FALSE
chr1	6627138	6627348	THAP3	-1313	1	0	0	3	0	0	NA	NA	FALSE	0	0	NA	NA	FALSE
chr1	6785369	6785769	CAMTA1	0	0	0	1	4	0	0	NA	NA	FALSE	0	0	NA	NA	FALSE
chr1	7198796	7198914	LOC105376692	41284	0	1	0	5	0	0	NA	NA	FALSE	0	0	NA	NA	FALSE
chr1	7207784	7207902	LOC105376692	32296	0	1	0	3	0	0	NA	NA	FALSE	0	0	NA	NA	FALSE
chr1	7224875	7224993	LOC105376692	15205	0	1	0	5	0	0	NA	NA	FALSE	0	0	NA	NA	FALSE
chr1	7246052	7246170	LOC105376692	-5972	0	1	0	4	0	0	NA	NA	FALSE	0	0	NA	NA	FALSE
chr1	7468989	7470001	LOC101928836	-27351	1	0	0	6	0	0	NA	NA	FALSE	0	0	NA	NA	FALSE
chr1	7470828	7471634	LOC101928836	-29087	1	0	0	9	0	0	NA	NA	FALSE	0	0	NA	NA	FALSE
chr1	7471755	7472243	LOC101928836	-29855	1	0	0	8	0	0	NA	NA	FALSE	0	0	NA	NA	FALSE
chr1	7505528	7505738	LOC105376691	2264	1	0	0	3	0	0	NA	NA	FALSE	0	0	NA	NA	FALSE
chr1	7577314	7577546	LOC105376691	74061	1	0	0	5	0	0	NA	NA	FALSE	0	0	NA	NA	FALSE
chr1	7632226	7632344	LOC105376689	71329	0	1	0	4	0	0	NA	NA	FALSE	0	0	NA	NA	FALSE
chr1	7640054	7640172	LOC105376689	63501	0	1	0	5	1	0.2	-0.1	0.945052	TRUE	0	0	NA	NA	FALSE
chr1	7641911	7642029	LOC105376689	61644	0	1	0	3	0	0	NA	NA	FALSE	0	0	NA	NA	FALSE
chr1	7644202	7644320	LOC105376689	59353	0	1	0	4	0	0	NA	NA	FALSE	0	0	NA	NA	FALSE
chr1	7647356	7647474	LOC105376689	56199	0	1	0	4	0	0	NA	NA	FALSE	0	0	NA	NA	FALSE
chr1	7651765	7651883	LOC105376689	51790	0	1	0	6	0	0	NA	NA	FALSE	0	0	NA	NA	FALSE
chr1	7652683	7652801	LOC105376689	50872	0	1	0	3	0	0	NA	NA	FALSE	0	0	NA	NA	FALSE
chr1	7667656	7667774	LOC105376689	35899	0	1	0	4	0	0	NA	NA	FALSE	0	0	NA	NA	FALSE
chr1	7675908	7676026	LOC105376689	27647	0	1	0	4	0	0	NA	NA	FALSE	0	0	NA	NA	FALSE
chr1	7902884	7903002	UTS2	10672	0	1	0	4	0	0	NA	NA	FALSE	0	0	NA	NA	FALSE
chr1	7932918	7933036	TNFRSF9	7998	0	1	0	4	0	0	NA	NA	FALSE	0	0	NA	NA	FALSE
chr1	7961590	7961990	PARK7	0	0	0	1	3	0	0	NA	NA	FALSE	0	0	NA	NA	FALSE
chr1	7975344	7975462	PARK7	13482	0	1	0	3	0	0	NA	NA	FALSE	0	0	NA	NA	FALSE
chr1	7982425	7982543	PARK7	20563	0	1	0	4	0	0	NA	NA	FALSE	0	0	NA	NA	FALSE
chr1	8015121	8015239	ERRFI1	8572	0	1	0	3	0	0	NA	NA	FALSE	0	0	NA	NA	FALSE
chr1	8315904	8316022	SLC45A1	-2121	0	1	0	4	0	0	NA	NA	FALSE	0	0	NA	NA	FALSE
chr1	8317677	8317795	SLC45A1	-348	0	1	0	4	0	0	NA	NA	FALSE	0	0	NA	NA	FALSE
chr1	8339363	8339481	SLC45A1	21315	0	1	0	5	0	0	NA	NA	FALSE	0	0	NA	NA	FALSE
chr1	8342476	8342594	SLC45A1	24428	0	1	0	3	0	0	NA	NA	FALSE	0	0	NA	NA	FALSE
chr1	8343937	8344055	SLC45A1	25889	0	1	0	5	0	0	NA	NA	FALSE	0	0	NA	NA	FALSE
chr1	8349112	8349230	SLC45A1	31064	0	1	0	5	0	0	NA	NA	FALSE	0	0	NA	NA	FALSE
chr1	8351794	8351912	SLC45A1	33746	0	1	0	5	0	0	NA	NA	FALSE	0	0	NA	NA	FALSE
chr1	8353499	8353617	SLC45A1	35451	0	1	0	5	0	0	NA	NA	FALSE	0	0	NA	NA	FALSE
chr1	8359371	8359489	SLC45A1	41323	0	1	0	5	0	0	NA	NA	FALSE	0	0	NA	NA	FALSE
chr1	8374935	8375053	RERE	48693	0	1	0	3	0	0	NA	NA	FALSE	1	0.333	0.788	0.016733	TRUE
chr1	8439600	8439718	LOC102724552	15015	0	1	0	3	0	0	NA	NA	FALSE	0	0	NA	NA	FALSE
chr1	8703091	8703491	RERE	0	0	0	1	4	0	0	NA	NA	FALSE	0	0	NA	NA	FALSE
chr1	8862586	8862704	MIR6728	3945	0	1	0	4	0	0	NA	NA	FALSE	0	0	NA	NA	FALSE
chr1	8871677	8871795	ENO1	-160	0	1	0	3	0	0	NA	NA	FALSE	0	0	NA	NA	FALSE
chr1	8872182	8872300	ENO1	-665	0	1	0	2	0	0	NA	NA	FALSE	0	0	NA	NA	FALSE
chr1	8878387	8878787	ENO1	0	0	0	1	4	0	0	NA	NA	FALSE	0	0	NA	NA	FALSE
chr1	8878834	8879092	ENO1-AS1	129	1	0	0	10	0	0	NA	NA	FALSE	0	0	NA	NA	FALSE
chr1	8879419	8879537	ENO1	-386	0	1	0	10	0	0	NA	NA	FALSE	0	0	NA	NA	FALSE
chr1	8889669	8889787	ENO1	-10636	0	1	0	4	0	0	NA	NA	FALSE	0	0	NA	NA	FALSE
chr1	8890164	8890282	ENO1	-11131	0	1	0	4	0	0	NA	NA	FALSE	0	0	NA	NA	FALSE
chr1	8910462	8910580	ENO1	-31429	0	1	0	4	0	0	NA	NA	FALSE	0	0	NA	NA	FALSE
chr1	8911165	8911283	ENO1	-32132	0	1	0	4	0	0	NA	NA	FALSE	0	0	NA	NA	FALSE
chr1	9010047	9010228	SLC2A7	16208	1	0	0	4	0	0	NA	NA	FALSE	0	0	NA	NA	FALSE
chr1	9024812	9024930	SLC2A7	1474	0	1	0	4	0	0	NA	NA	FALSE	0	0	NA	NA	FALSE
chr1	9058519	9058637	SLC2A5	-9323	0	1	0	3	0	0	NA	NA	FALSE	0	0	NA	NA	FALSE
chr1	9069706	9069824	SLC2A5	63	0	1	0	4	0	0	NA	NA	FALSE	0	0	NA	NA	FALSE
chr1	9094197	9094315	SLC2A5	-849	0	1	0	3	0	0	NA	NA	FALSE	0	0	NA	NA	FALSE
chr1	9234696	9235096	H6PD	0	0	0	1	1	0	0	NA	NA	FALSE	0	0	NA	NA	FALSE
chr1	9234803	9235544	H6PD	370	1	0	0	7	0	0	NA	NA	FALSE	0	0	NA	NA	FALSE
chr1	9257685	9257884	H6PD	12548	1	0	0	6	0	0	NA	NA	FALSE	0	0	NA	NA	FALSE
chr1	9267450	9267564	H6PD	22271	1	0	0	4	0	0	NA	NA	FALSE	1	0.25	0.883	0.0171341	TRUE
chr1	9588793	9589193	TMEM201	0	0	0	1	4	0	0	NA	NA	FALSE	0	0	NA	NA	FALSE
chr1	9593981	9594099	TMEM201	4681	0	1	0	5	0	0	NA	NA	FALSE	0	0	NA	NA	FALSE
chr1	9595098	9595334	TMEM201	5857	1	0	0	5	0	0	NA	NA	FALSE	0	0	NA	NA	FALSE
chr1	9601194	9601312	TMEM201	11894	0	1	0	5	0	0	NA	NA	FALSE	0	0	NA	NA	FALSE
chr1	9604261	9604379	LOC107985734	-10320	0	1	0	5	0	0	NA	NA	FALSE	0	0	NA	NA	FALSE
chr1	9627134	9627252	LOC105376712	2235	0	1	0	7	0	0	NA	NA	FALSE	0	0	NA	NA	FALSE
chr1	9651731	9653071	PIK3CD	670	0	1	0	17	0	0	NA	NA	FALSE	0	0	NA	NA	FALSE
chr1	9653174	9653487	PIK3CD-AS1	1256	1	0	0	7	0	0	NA	NA	FALSE	0	0	NA	NA	FALSE
chr1	9654200	9654318	PIK3CD-AS1	327	0	1	0	3	0	0	NA	NA	FALSE	0	0	NA	NA	FALSE
chr1	9702376	9702494	PIK3CD	8949	0	1	0	3	0	0	NA	NA	FALSE	0	0	NA	NA	FALSE
chr1	9717394	9717512	PIK3CD	23967	0	1	0	4	0	0	NA	NA	FALSE	0	0	NA	NA	FALSE
chr1	9720458	9720576	PIK3CD	27031	0	1	0	5	0	0	NA	NA	FALSE	0	0	NA	NA	FALSE
chr1	9721915	9722033	PIK3CD	28488	0	1	0	4	0	0	NA	NA	FALSE	0	0	NA	NA	FALSE
chr1	9725164	9725282	PIK3CD	31737	0	1	0	3	0	0	NA	NA	FALSE	0	0	NA	NA	FALSE
chr1	9852074	9852389	LOC105376717	1459	1	0	0	4	0	0	NA	NA	FALSE	0	0	NA	NA	FALSE
chr1	9909933	9910333	CTNNBIP1	0	0	0	1	5	0	0	NA	NA	FALSE	1	0.2	0.677	0.00669116	TRUE
chr1	10210470	10210870	KIF1B	0	0	0	1	4	0	0	NA	NA	FALSE	0	0	NA	NA	FALSE
chr1	10377530	10377648	LOC105376725	-10979	0	1	0	3	0	0	NA	NA	FALSE	0	0	NA	NA	FALSE
chr1	10398967	10399367	PGD	0	0	0	1	6	2	0.333	-1.944	2.21399e-06	TRUE	0	0	NA	NA	FALSE
chr1	10415414	10415532	APITD1	-14628	0	1	0	3	0	0	NA	NA	FALSE	0	0	NA	NA	FALSE
chr1	10419520	10419638	APITD1	-10522	0	1	0	3	0	0	NA	NA	FALSE	0	0	NA	NA	FALSE
chr1	10430315	10430433	APITD1	273	0	1	0	5	0	0	NA	NA	FALSE	0	0	NA	NA	FALSE
chr1	10471784	10472556	DFFA	386	0	1	0	9	0	0	NA	NA	FALSE	0	0	NA	NA	FALSE
chr1	10474852	10475252	PEX14	0	0	0	1	1	0	0	NA	NA	FALSE	0	0	NA	NA	FALSE
chr1	10474945	10475566	PEX14	310	0	1	0	7	0	0	NA	NA	FALSE	0	0	NA	NA	FALSE
chr1	10494769	10494887	PEX14	9864	0	1	0	4	0	0	NA	NA	FALSE	0	0	NA	NA	FALSE
chr1	10634492	10636540	CASZ1	58966	1	0	0	16	0	0	NA	NA	FALSE	0	0	NA	NA	FALSE
chr1	10759355	10759522	CASZ1	1667	1	0	0	4	0	0	NA	NA	FALSE	0	0	NA	NA	FALSE
chr1	10796347	10796747	CASZ1	0	0	0	1	4	0	0	NA	NA	FALSE	0	0	NA	NA	FALSE
chr1	11012230	11012348	TARDBP	-332	0	1	0	6	0	0	NA	NA	FALSE	0	0	NA	NA	FALSE
chr1	11012558	11012958	TARDBP	0	0	0	1	1	0	0	NA	NA	FALSE	0	0	NA	NA	FALSE
chr1	11012621	11013434	TARDBP	394	0	1	0	12	0	0	NA	NA	FALSE	0	0	NA	NA	FALSE
chr1	11054570	11054688	SRM	5405	0	1	0	3	0	0	NA	NA	FALSE	0	0	NA	NA	FALSE
chr1	11054981	11055099	SRM	4994	0	1	0	2	0	0	NA	NA	FALSE	0	0	NA	NA	FALSE
chr1	11059739	11060139	SRM	0	0	0	1	5	0	0	NA	NA	FALSE	0	0	NA	NA	FALSE
chr1	11241824	11241942	MTOR	16689	0	1	0	3	0	0	NA	NA	FALSE	0	0	NA	NA	FALSE
chr1	11248271	11248389	MTOR	10242	0	1	0	3	0	0	NA	NA	FALSE	0	0	NA	NA	FALSE
chr1	11262250	11262650	MTOR	0	0	0	1	3	1	0.333	-2.567	4.13877e-16	TRUE	0	0	NA	NA	FALSE
chr1	11262607	11262725	MTOR	-115	0	1	0	4	2	0.5	-1.578	4.52521e-07	TRUE	1	0.25	0.706	0.0278678	TRUE
chr1	11272911	11273029	UBIAD1	-227	0	1	0	4	0	0	NA	NA	FALSE	0	0	NA	NA	FALSE
chr1	11273110	11273510	UBIAD1	0	0	0	1	4	0	0	NA	NA	FALSE	0	0	NA	NA	FALSE
chr1	11296032	11296150	LOC105376737	21370	0	1	0	5	1	0.2	0.663	0.615086	TRUE	0	0	NA	NA	FALSE
chr1	11664092	11665129	FBXO6	-22	1	0	0	11	0	0	NA	NA	FALSE	1	0.091	1.044	4.42064e-08	TRUE
chr1	11664112	11664512	FBXO6	0	0	0	1	1	0	0	NA	NA	FALSE	0	0	NA	NA	FALSE
chr1	11701692	11701876	MAD2L2	-9996	1	0	0	3	0	0	NA	NA	FALSE	0	0	NA	NA	FALSE
chr1	11714888	11715168	AGTRAP	-21056	1	0	0	5	0	0	NA	NA	FALSE	0	0	NA	NA	FALSE
chr1	11908153	11910232	RNU5E-1	1039	1	0	0	10	0	0	NA	NA	FALSE	0	0	NA	NA	FALSE
chr1	11934617	11935017	PLOD1	0	0	0	1	2	0	0	NA	NA	FALSE	0	0	NA	NA	FALSE
chr1	11934666	11935401	PLOD1	367	1	0	0	4	0	0	NA	NA	FALSE	1	0.25	0.697	0.0202742	TRUE
chr1	12019399	12019799	MIIP	0	0	0	1	5	0	0	NA	NA	FALSE	0	0	NA	NA	FALSE
chr1	12031381	12031499	MIR6729	2283	0	1	0	4	0	0	NA	NA	FALSE	0	0	NA	NA	FALSE
chr1	12051944	12052062	TNFRSF8	-11314	0	1	0	3	0	0	NA	NA	FALSE	0	0	NA	NA	FALSE
chr1	12053143	12053261	TNFRSF8	-10115	0	1	0	3	0	0	NA	NA	FALSE	0	0	NA	NA	FALSE
chr1	12059771	12059889	TNFRSF8	-3487	0	1	0	3	0	0	NA	NA	FALSE	0	0	NA	NA	FALSE
chr1	12063467	12063585	TNFRSF8	150	0	1	0	5	0	0	NA	NA	FALSE	0	0	NA	NA	FALSE
chr1	12064722	12064840	TNFRSF8	1405	0	1	0	4	0	0	NA	NA	FALSE	0	0	NA	NA	FALSE
chr1	12079712	12079830	TNFRSF8	16395	0	1	0	4	0	0	NA	NA	FALSE	1	0.25	0.614	0.0432688	TRUE
chr1	12167002	12169054	TNFRSF1B	1026	1	0	0	24	0	0	NA	NA	FALSE	0	0	NA	NA	FALSE
chr1	12169082	12169308	TNFRSF1B	2193	1	0	0	7	0	0	NA	NA	FALSE	0	0	NA	NA	FALSE
chr1	12170144	12170671	TNFRSF1B	-2824	1	0	0	3	0	0	NA	NA	FALSE	0	0	NA	NA	FALSE
chr1	12171552	12171805	TNFRSF1B	-1553	1	0	0	3	0	0	NA	NA	FALSE	0	0	NA	NA	FALSE
chr1	12171970	12172405	TNFRSF1B	-1044	1	0	0	5	0	0	NA	NA	FALSE	0	0	NA	NA	FALSE
chr1	12173544	12174162	TNFRSF1B	622	1	0	0	5	1	0.2	-0.693	0.015587	TRUE	0	0	NA	NA	FALSE
chr1	12174816	12175761	TNFRSF1B	2057	1	0	0	6	0	0	NA	NA	FALSE	0	0	NA	NA	FALSE
chr1	12229889	12230007	VPS13D	-90	0	1	0	4	0	0	NA	NA	FALSE	0	0	NA	NA	FALSE
chr1	12229933	12230333	VPS13D	0	0	0	1	2	0	0	NA	NA	FALSE	0	0	NA	NA	FALSE
chr1	12244231	12244349	VPS13D	14252	0	1	0	3	0	0	NA	NA	FALSE	0	0	NA	NA	FALSE
chr1	12597802	12598032	DHRS3	-1521	1	0	0	3	0	0	NA	NA	FALSE	0	0	NA	NA	FALSE
chr1	12598051	12598232	DHRS3	-1745	1	0	0	3	0	0	NA	NA	FALSE	0	0	NA	NA	FALSE
chr1	12659103	12659221	AADACL4	-5427	0	1	0	4	0	0	NA	NA	FALSE	0	0	NA	NA	FALSE
chr1	13451563	13451681	LOC102724856	-35221	0	1	0	4	0	0	NA	NA	FALSE	0	0	NA	NA	FALSE
chr1	13469452	13469570	LOC102724856	-17332	0	1	0	3	0	0	NA	NA	FALSE	0	0	NA	NA	FALSE
chr1	13749326	13749726	PRDM2	0	0	0	1	5	0	0	NA	NA	FALSE	0	0	NA	NA	FALSE
chr1	13765123	13765241	PRDM2	-6538	0	1	0	3	0	0	NA	NA	FALSE	0	0	NA	NA	FALSE
chr1	13793177	13793295	PRDM2	21516	0	1	0	3	0	0	NA	NA	FALSE	0	0	NA	NA	FALSE
chr1	13795470	13795588	PRDM2	23809	0	1	0	3	0	0	NA	NA	FALSE	0	0	NA	NA	FALSE
chr1	13801032	13801150	PRDM2	29371	0	1	0	4	0	0	NA	NA	FALSE	0	0	NA	NA	FALSE
chr1	13801778	13801896	PRDM2	30117	0	1	0	3	0	0	NA	NA	FALSE	0	0	NA	NA	FALSE
chr1	13807558	13807676	PRDM2	35897	0	1	0	4	0	0	NA	NA	FALSE	0	0	NA	NA	FALSE
chr1	13808837	13808955	PRDM2	37176	0	1	0	4	0	0	NA	NA	FALSE	0	0	NA	NA	FALSE
chr1	13811330	13811448	PRDM2	39669	0	1	0	4	0	0	NA	NA	FALSE	0	0	NA	NA	FALSE
chr1	13813749	13813867	PRDM2	42088	0	1	0	3	0	0	NA	NA	FALSE	0	0	NA	NA	FALSE
chr1	13825190	13825308	PRDM2	53529	0	1	0	3	0	0	NA	NA	FALSE	0	0	NA	NA	FALSE
chr1	13828972	13829090	PRDM2	57311	0	1	0	4	0	0	NA	NA	FALSE	0	0	NA	NA	FALSE
chr1	14571986	14572104	KAZN	-26671	0	1	0	5	0	0	NA	NA	FALSE	0	0	NA	NA	FALSE
chr1	14599037	14599155	KAZN	375	0	1	0	10	0	0	NA	NA	FALSE	0	0	NA	NA	FALSE
chr1	14599299	14599417	KAZN	637	0	1	0	10	0	0	NA	NA	FALSE	0	0	NA	NA	FALSE
chr1	14627300	14627501	KAZN	28679	1	0	0	4	0	0	NA	NA	FALSE	0	0	NA	NA	FALSE
chr1	14924044	14924444	KAZN	0	0	0	1	4	0	0	NA	NA	FALSE	0	0	NA	NA	FALSE
chr1	14999340	14999570	KAZN	53537	1	0	0	5	0	0	NA	NA	FALSE	0	0	NA	NA	FALSE
chr1	15112409	15112527	TMEM51	-39949	0	1	0	3	0	0	NA	NA	FALSE	0	0	NA	NA	FALSE
chr1	15128645	15128763	TMEM51	-23713	0	1	0	4	0	0	NA	NA	FALSE	0	0	NA	NA	FALSE
chr1	15153640	15154040	TMEM51	0	0	0	1	4	0	0	NA	NA	FALSE	0	0	NA	NA	FALSE
chr1	15154169	15154287	TMEM51	496	0	1	0	6	0	0	NA	NA	FALSE	0	0	NA	NA	FALSE
chr1	15501532	15501650	CASP9	22648	0	1	0	3	0	0	NA	NA	FALSE	0	0	NA	NA	FALSE
chr1	15507336	15507454	CASP9	16844	0	1	0	4	0	0	NA	NA	FALSE	0	0	NA	NA	FALSE
chr1	15523925	15524325	CASP9	0	0	0	1	5	0	0	NA	NA	FALSE	0	0	NA	NA	FALSE
chr1	15526489	15526607	DNAJC16	-145	0	1	0	5	0	0	NA	NA	FALSE	0	0	NA	NA	FALSE
chr1	15526774	15527174	DNAJC16	0	0	0	1	4	0	0	NA	NA	FALSE	0	0	NA	NA	FALSE
chr1	15684224	15684624	PLEKHM2	0	0	0	1	1	0	0	NA	NA	FALSE	0	0	NA	NA	FALSE
chr1	15684331	15685462	PLEKHM2	565	1	0	0	11	0	0	NA	NA	FALSE	0	0	NA	NA	FALSE
chr1	15732105	15732223	SLC25A34	-2923	0	1	0	5	0	0	NA	NA	FALSE	0	0	NA	NA	FALSE
chr1	15736537	15736655	SLC25A34	283	0	1	0	5	0	0	NA	NA	FALSE	0	0	NA	NA	FALSE
chr1	15741481	15741599	TMEM82	-951	0	1	0	4	0	0	NA	NA	FALSE	0	0	NA	NA	FALSE
chr1	15744118	15744236	TMEM82	1686	0	1	0	5	0	0	NA	NA	FALSE	0	0	NA	NA	FALSE
chr1	15757629	15757747	FBLIM1	-217	0	1	0	5	0	0	NA	NA	FALSE	0	0	NA	NA	FALSE
chr1	15758693	15759093	FBLIM1	0	0	0	1	5	0	0	NA	NA	FALSE	1	0.2	0.789	0.00103276	TRUE
chr1	15762620	15762738	FBLIM1	-1819	0	1	0	3	0	0	NA	NA	FALSE	0	0	NA	NA	FALSE
chr1	15792145	15792263	UQCRHL	15495	0	1	0	4	0	0	NA	NA	FALSE	0	0	NA	NA	FALSE
chr1	15833099	15833683	SPEN	-14472	1	0	0	3	0	0	NA	NA	FALSE	0	0	NA	NA	FALSE
chr1	15836873	15837805	SPEN	-10524	1	0	0	7	0	0	NA	NA	FALSE	0	0	NA	NA	FALSE
chr1	16007179	16007297	C1orf64	3003	0	1	0	4	0	0	NA	NA	FALSE	0	0	NA	NA	FALSE
chr1	16009138	16009256	C1orf64	4962	0	1	0	4	0	0	NA	NA	FALSE	0	0	NA	NA	FALSE
chr1	16013197	16013315	HSPB7	5534	0	1	0	6	0	0	NA	NA	FALSE	0	0	NA	NA	FALSE
chr1	16017408	16017526	HSPB7	1323	0	1	0	6	0	0	NA	NA	FALSE	0	0	NA	NA	FALSE
chr1	16026450	16026568	CLCNKA	4519	0	1	0	4	0	0	NA	NA	FALSE	0	0	NA	NA	FALSE
chr1	16027248	16027366	CLCNKA	5317	0	1	0	4	0	0	NA	NA	FALSE	0	0	NA	NA	FALSE
chr1	16042216	16042334	CLCNKB	-1460	0	1	0	4	0	0	NA	NA	FALSE	0	0	NA	NA	FALSE
chr1	16046936	16047054	CLCNKB	-1766	0	1	0	4	0	0	NA	NA	FALSE	0	0	NA	NA	FALSE
chr1	16048250	16048368	CLCNKB	-452	0	1	0	2	0	0	NA	NA	FALSE	0	0	NA	NA	FALSE
chr1	16048673	16048791	CLCNKB	-29	0	1	0	3	0	0	NA	NA	FALSE	0	0	NA	NA	FALSE
chr1	16064559	16064677	FAM131C	9014	0	1	0	4	0	0	NA	NA	FALSE	0	0	NA	NA	FALSE
chr1	16067057	16067185	FAM131C	6511	1	0	0	6	0	0	NA	NA	FALSE	0	0	NA	NA	FALSE
chr1	16073199	16073317	FAM131C	374	0	1	0	5	0	0	NA	NA	FALSE	0	0	NA	NA	FALSE
chr1	16073324	16073724	FAM131C	0	0	0	1	3	0	0	NA	NA	FALSE	0	0	NA	NA	FALSE
chr1	16076171	16076289	FAM131C	-2598	0	1	0	4	0	0	NA	NA	FALSE	0	0	NA	NA	FALSE
chr1	16078994	16079112	FAM131C	-5421	0	1	0	4	0	0	NA	NA	FALSE	0	0	NA	NA	FALSE
chr1	16082454	16082572	FAM131C	-8881	0	1	0	6	0	0	NA	NA	FALSE	0	0	NA	NA	FALSE
chr1	16367062	16368495	SZRD1	749	1	0	0	11	0	0	NA	NA	FALSE	0	0	NA	NA	FALSE
chr1	16368565	16368789	SZRD1	1648	1	0	0	3	0	0	NA	NA	FALSE	0	0	NA	NA	FALSE
chr1	16498918	16499036	CROCCP3	-6276	0	1	0	6	0	0	NA	NA	FALSE	0	0	NA	NA	FALSE
chr1	16725105	16725376	ESPNP	-5083	1	0	0	3	0	0	NA	NA	FALSE	0	0	NA	NA	FALSE
chr1	16888772	16889478	LOC105376805	353	1	0	0	5	0	0	NA	NA	FALSE	0	0	NA	NA	FALSE
chr1	16921829	16921947	CROCC	-61	0	1	0	3	0	0	NA	NA	FALSE	0	0	NA	NA	FALSE
chr1	16923176	16923294	CROCC	1286	0	1	0	4	0	0	NA	NA	FALSE	0	0	NA	NA	FALSE
chr1	16925087	16925205	CROCC	3197	0	1	0	4	0	0	NA	NA	FALSE	0	0	NA	NA	FALSE
chr1	16948412	16948530	CROCC	26522	0	1	0	3	0	0	NA	NA	FALSE	0	0	NA	NA	FALSE
chr1	16959799	16959917	LOC105376806	-16434	0	1	0	4	0	0	NA	NA	FALSE	0	0	NA	NA	FALSE
chr1	16960681	16960799	LOC105376806	-15552	0	1	0	3	0	0	NA	NA	FALSE	0	0	NA	NA	FALSE
chr1	16963310	16963428	LOC105376806	-12923	0	1	0	5	0	0	NA	NA	FALSE	0	0	NA	NA	FALSE
chr1	16971535	16971653	LOC105376806	-4698	0	1	0	4	0	0	NA	NA	FALSE	0	0	NA	NA	FALSE
chr1	16986500	16986618	MFAP2	-4910	0	1	0	5	0	0	NA	NA	FALSE	0	0	NA	NA	FALSE
chr1	17011628	17012028	ATP13A2	0	0	0	1	4	0	0	NA	NA	FALSE	0	0	NA	NA	FALSE
chr1	17370720	17370838	PADI6	-1416	0	1	0	3	0	0	NA	NA	FALSE	1	0.333	0.978	0.0384196	TRUE
chr1	17401033	17401151	PADI6	28897	0	1	0	6	0	0	NA	NA	FALSE	0	0	NA	NA	FALSE
chr1	17406286	17406404	RCC2	32218	0	1	0	4	0	0	NA	NA	FALSE	0	0	NA	NA	FALSE
chr1	17419968	17420086	RCC2	18536	0	1	0	4	0	0	NA	NA	FALSE	0	0	NA	NA	FALSE
chr1	17424138	17424256	RCC2	14366	0	1	0	6	0	0	NA	NA	FALSE	0	0	NA	NA	FALSE
chr1	17427205	17427323	RCC2	11299	0	1	0	3	0	0	NA	NA	FALSE	0	0	NA	NA	FALSE
chr1	17432332	17432450	RCC2	6172	0	1	0	3	0	0	NA	NA	FALSE	0	0	NA	NA	FALSE
chr1	17438236	17438636	RCC2	0	0	0	1	3	0	0	NA	NA	FALSE	0	0	NA	NA	FALSE
chr1	17460347	17460465	RCC2	-20652	0	1	0	4	0	0	NA	NA	FALSE	0	0	NA	NA	FALSE
chr1	17539622	17540022	ARHGEF10L	0	0	0	1	6	0	0	NA	NA	FALSE	0	0	NA	NA	FALSE
chr1	17559329	17559618	ARHGEF10L	19603	1	0	0	8	0	0	NA	NA	FALSE	0	0	NA	NA	FALSE
chr1	17559729	17560488	ARHGEF10L	20238	1	0	0	9	0	0	NA	NA	FALSE	0	0	NA	NA	FALSE
chr1	17561112	17562061	ARHGEF10L	-18867	1	0	0	9	0	0	NA	NA	FALSE	0	0	NA	NA	FALSE
chr1	17601806	17601924	ARHGEF10L	-1707	0	1	0	4	0	0	NA	NA	FALSE	0	0	NA	NA	FALSE
chr1	17603359	17603477	ARHGEF10L	-154	0	1	0	5	0	0	NA	NA	FALSE	0	0	NA	NA	FALSE
chr1	17606972	17607090	ARHGEF10L	3459	0	1	0	4	0	0	NA	NA	FALSE	0	0	NA	NA	FALSE
chr1	17607742	17607860	ARHGEF10L	4229	0	1	0	6	0	0	NA	NA	FALSE	0	0	NA	NA	FALSE
chr1	17627533	17627651	ARHGEF10L	9280	0	1	0	3	0	0	NA	NA	FALSE	0	0	NA	NA	FALSE
chr1	17629555	17629673	ARHGEF10L	11302	0	1	0	4	0	0	NA	NA	FALSE	0	0	NA	NA	FALSE
chr1	17647009	17647127	ARHGEF10L	28756	0	1	0	6	0	0	NA	NA	FALSE	0	0	NA	NA	FALSE
chr1	17653890	17654008	ARHGEF10L	35637	0	1	0	3	0	0	NA	NA	FALSE	0	0	NA	NA	FALSE
chr1	17654692	17654842	ARHGEF10L	36455	1	0	0	3	0	0	NA	NA	FALSE	0	0	NA	NA	FALSE
chr1	17661698	17661816	ARHGEF10L	43445	0	1	0	5	0	0	NA	NA	FALSE	0	0	NA	NA	FALSE
chr1	17664312	17664430	ARHGEF10L	46059	0	1	0	3	0	0	NA	NA	FALSE	0	0	NA	NA	FALSE
chr1	17667456	17667574	ARHGEF10L	49203	0	1	0	4	0	0	NA	NA	FALSE	0	0	NA	NA	FALSE
chr1	17668828	17668946	LOC107984028	-48685	0	1	0	3	0	0	NA	NA	FALSE	0	0	NA	NA	FALSE
chr1	17672011	17672129	LOC107984028	-45502	0	1	0	3	0	0	NA	NA	FALSE	0	0	NA	NA	FALSE
chr1	18570044	18570162	PAX7	-60902	0	1	0	5	0	0	NA	NA	FALSE	0	0	NA	NA	FALSE
chr1	18575708	18575826	PAX7	-55238	0	1	0	5	0	0	NA	NA	FALSE	0	0	NA	NA	FALSE
chr1	18581557	18581675	PAX7	-49389	0	1	0	4	0	0	NA	NA	FALSE	0	0	NA	NA	FALSE
chr1	18584881	18584999	PAX7	-46065	0	1	0	4	0	0	NA	NA	FALSE	0	0	NA	NA	FALSE
chr1	18597269	18597648	PAX7	-33547	0	1	0	5	0	0	NA	NA	FALSE	0	0	NA	NA	FALSE
chr1	18636481	18636599	PAX7	5535	0	1	0	6	0	0	NA	NA	FALSE	0	0	NA	NA	FALSE
chr1	18845055	18845173	TAS1R2	14547	0	1	0	3	0	0	NA	NA	FALSE	0	0	NA	NA	FALSE
chr1	18854840	18854958	TAS1R2	4762	0	1	0	6	0	0	NA	NA	FALSE	0	0	NA	NA	FALSE
chr1	18865268	18865386	TAS1R2	-5666	0	1	0	5	0	0	NA	NA	FALSE	0	0	NA	NA	FALSE
chr1	18875346	18875464	MIR4695	7870	0	1	0	3	0	0	NA	NA	FALSE	0	0	NA	NA	FALSE
chr1	18884256	18884374	MIR4695	-1040	0	1	0	4	0	0	NA	NA	FALSE	0	0	NA	NA	FALSE
chr1	18902241	18902641	ALDH4A1	0	0	0	1	5	0	0	NA	NA	FALSE	0	0	NA	NA	FALSE
chr1	18902931	18903049	ALDH4A1	-191	0	1	0	5	0	0	NA	NA	FALSE	0	0	NA	NA	FALSE
chr1	18907060	18907178	ALDH4A1	-4320	0	1	0	3	0	0	NA	NA	FALSE	0	0	NA	NA	FALSE
chr1	18913155	18913273	ALDH4A1	-10415	0	1	0	5	0	0	NA	NA	FALSE	0	0	NA	NA	FALSE
chr1	18918526	18918644	ALDH4A1	-15786	0	1	0	5	0	0	NA	NA	FALSE	0	0	NA	NA	FALSE
chr1	18956375	18956775	IFFO2	0	0	0	1	5	0	0	NA	NA	FALSE	0	0	NA	NA	FALSE
chr1	19241374	19241492	EMC1	10121	0	1	0	3	0	0	NA	NA	FALSE	0	0	NA	NA	FALSE
chr1	19312214	19312614	PQLC2	0	0	0	1	4	0	0	NA	NA	FALSE	0	0	NA	NA	FALSE
chr1	19312699	19312817	PQLC2	411	0	1	0	5	0	0	NA	NA	FALSE	0	0	NA	NA	FALSE
chr1	19317675	19317793	PQLC2	5387	0	1	0	5	0	0	NA	NA	FALSE	0	0	NA	NA	FALSE
chr1	19391216	19391850	LOC644083	-8408	1	0	0	3	0	0	NA	NA	FALSE	0	0	NA	NA	FALSE
chr1	19393006	19393692	LOC644083	-6592	1	0	0	7	0	0	NA	NA	FALSE	0	0	NA	NA	FALSE
chr1	19414947	19415180	CAPZB	-6442	1	0	0	3	0	0	NA	NA	FALSE	1	0.333	0.659	0.0159182	TRUE
chr1	19485228	19485628	CAPZB	0	0	0	1	3	0	0	NA	NA	FALSE	0	0	NA	NA	FALSE
chr1	19644225	19644625	NBL1	0	0	0	1	4	0	0	NA	NA	FALSE	0	0	NA	NA	FALSE
chr1	19651168	19651286	NBL1	3618	0	1	0	4	0	0	NA	NA	FALSE	0	0	NA	NA	FALSE
chr1	19653812	19653930	NBL1	6262	0	1	0	5	0	0	NA	NA	FALSE	0	0	NA	NA	FALSE
chr1	19659950	19660068	HTR6	-5277	0	1	0	4	0	0	NA	NA	FALSE	0	0	NA	NA	FALSE
chr1	19665330	19665448	HTR6	103	0	1	0	6	0	0	NA	NA	FALSE	0	0	NA	NA	FALSE
chr1	19666238	19666356	HTR6	1011	0	1	0	5	0	0	NA	NA	FALSE	0	0	NA	NA	FALSE
chr1	19675631	19675749	HTR6	10404	0	1	0	3	0	0	NA	NA	FALSE	0	0	NA	NA	FALSE
chr1	19690393	19690511	HTR6	25166	0	1	0	3	0	0	NA	NA	FALSE	0	0	NA	NA	FALSE
chr1	19695916	19696034	HTR6	30689	0	1	0	4	0	0	NA	NA	FALSE	0	0	NA	NA	FALSE
chr1	19704658	19704776	HTR6	39431	0	1	0	4	0	0	NA	NA	FALSE	0	0	NA	NA	FALSE
chr1	19715726	19715844	HTR6	50499	0	1	0	4	0	0	NA	NA	FALSE	0	0	NA	NA	FALSE
chr1	19786766	19787166	TMCO4	0	0	0	1	3	0	0	NA	NA	FALSE	0	0	NA	NA	FALSE
chr1	19798998	19799917	TMCO4	11	1	0	0	8	0	0	NA	NA	FALSE	0	0	NA	NA	FALSE
chr1	19872283	19872401	OTUD3	-9368	0	1	0	4	0	0	NA	NA	FALSE	0	0	NA	NA	FALSE
chr1	19882206	19882324	OTUD3	-129	0	1	0	5	0	0	NA	NA	FALSE	0	0	NA	NA	FALSE
chr1	19882311	19882711	OTUD3	0	0	0	1	5	0	0	NA	NA	FALSE	0	0	NA	NA	FALSE
chr1	19918127	19918245	PLA2G2E	5431	0	1	0	3	0	0	NA	NA	FALSE	0	0	NA	NA	FALSE
chr1	20151814	20152859	PLA2G2F	13000	1	0	0	11	1	0.091	-1.383	1.22102e-06	TRUE	0	0	NA	NA	FALSE
chr1	20152957	20153519	PLA2G2F	13902	1	0	0	5	1	0.2	-1.383	1.22102e-06	TRUE	0	0	NA	NA	FALSE
chr1	20484180	20484298	CAMK2N1	1996	0	1	0	6	0	0	NA	NA	FALSE	0	0	NA	NA	FALSE
chr1	20485933	20486333	CAMK2N1	0	0	0	1	3	0	0	NA	NA	FALSE	0	0	NA	NA	FALSE
chr1	20487084	20487202	CAMK2N1	-908	0	1	0	5	0	0	NA	NA	FALSE	0	0	NA	NA	FALSE
chr1	20491959	20492077	CAMK2N1	-5783	0	1	0	5	0	0	NA	NA	FALSE	0	0	NA	NA	FALSE
chr1	20493716	20494032	CAMK2N1	-7639	0	1	0	4	0	0	NA	NA	FALSE	0	0	NA	NA	FALSE
chr1	20522450	20522568	MUL1	-14026	0	1	0	4	0	0	NA	NA	FALSE	0	0	NA	NA	FALSE
chr1	20654426	20654544	PINK1-AS	-2292	0	1	0	5	0	0	NA	NA	FALSE	0	0	NA	NA	FALSE
chr1	20656246	20656364	PINK1-AS	-4112	0	1	0	3	0	0	NA	NA	FALSE	0	0	NA	NA	FALSE
chr1	20661076	20661476	DDOST	0	0	0	1	4	1	0.25	-2.03	2.45914e-10	TRUE	0	0	NA	NA	FALSE
chr1	20661648	20661766	DDOST	-163	0	1	0	6	0	0	NA	NA	FALSE	0	0	NA	NA	FALSE
chr1	20663540	20663658	DDOST	-2055	0	1	0	3	0	0	NA	NA	FALSE	0	0	NA	NA	FALSE
chr1	20670585	20670703	DDOST	-9100	0	1	0	4	0	0	NA	NA	FALSE	0	0	NA	NA	FALSE
chr1	20687872	20687990	KIF17	892	0	1	0	4	0	0	NA	NA	FALSE	0	0	NA	NA	FALSE
chr1	20696543	20696661	KIF17	-7779	0	1	0	5	0	0	NA	NA	FALSE	0	0	NA	NA	FALSE
chr1	20711867	20711985	KIF17	5488	0	1	0	5	0	0	NA	NA	FALSE	0	0	NA	NA	FALSE
chr1	21216989	21217107	EIF4G3	-39728	0	1	0	4	0	0	NA	NA	FALSE	0	0	NA	NA	FALSE
chr1	21232093	21232211	ECE1	47538	0	1	0	4	0	0	NA	NA	FALSE	0	0	NA	NA	FALSE
chr1	21345195	21345595	ECE1	0	0	0	1	6	1	0.167	-1.088	0.00071024	TRUE	0	0	NA	NA	FALSE
chr1	21398476	21398750	LOC105376832	15466	1	0	0	3	0	0	NA	NA	FALSE	0	0	NA	NA	FALSE
chr1	21435876	21436298	NBPF3	-687	1	0	0	8	1	0.125	-0.063	0.97366	TRUE	0	0	NA	NA	FALSE
chr1	21436384	21437389	NBPF3	112	1	0	0	10	1	0.1	-0.063	0.97366	TRUE	0	0	NA	NA	FALSE
chr1	21609910	21610028	RAP1GAP	12588	0	1	0	5	0	0	NA	NA	FALSE	0	0	NA	NA	FALSE
chr1	21618937	21619055	RAP1GAP	3561	0	1	0	4	0	0	NA	NA	FALSE	0	0	NA	NA	FALSE
chr1	21622243	21622643	RAP1GAP	0	0	0	1	5	0	0	NA	NA	FALSE	0	0	NA	NA	FALSE
chr1	21655849	21655967	RAP1GAP	-4046	0	1	0	3	0	0	NA	NA	FALSE	0	0	NA	NA	FALSE
chr1	21657913	21658031	RAP1GAP	-6110	0	1	0	3	0	0	NA	NA	FALSE	0	0	NA	NA	FALSE
chr1	21659211	21659329	RAP1GAP	-7408	0	1	0	3	0	0	NA	NA	FALSE	0	0	NA	NA	FALSE
chr1	21663680	21663798	RAP1GAP	3939	0	1	0	4	0	0	NA	NA	FALSE	0	0	NA	NA	FALSE
chr1	21666034	21666431	RAP1GAP	1446	1	0	0	3	0	0	NA	NA	FALSE	0	0	NA	NA	FALSE
chr1	21668608	21668726	RAP1GAP	647	0	1	0	4	0	0	NA	NA	FALSE	0	0	NA	NA	FALSE
chr1	21669952	21670070	RAP1GAP	-567	0	1	0	6	0	0	NA	NA	FALSE	0	0	NA	NA	FALSE
chr1	21703440	21703558	USP48	29332	0	1	0	3	0	0	NA	NA	FALSE	0	0	NA	NA	FALSE
chr1	21782790	21783190	USP48	0	0	0	1	4	0	0	NA	NA	FALSE	0	0	NA	NA	FALSE
chr1	22024228	22024346	LINC00339	-903	0	1	0	5	0	0	NA	NA	FALSE	0	0	NA	NA	FALSE
chr1	22052604	22053004	CDC42	0	0	0	1	5	0	0	NA	NA	FALSE	0	0	NA	NA	FALSE
chr1	22053417	22053535	CDC42	850	0	1	0	5	0	0	NA	NA	FALSE	0	0	NA	NA	FALSE
chr1	22121377	22121654	WNT4	19308	1	0	0	5	0	0	NA	NA	FALSE	0	0	NA	NA	FALSE
chr1	22141610	22143026	WNT4	-6	1	0	0	13	0	0	NA	NA	FALSE	0	0	NA	NA	FALSE
chr1	22415649	22415767	LOC105376856	3230	0	1	0	4	0	0	NA	NA	FALSE	0	0	NA	NA	FALSE
chr1	22416710	22416828	LOC105376856	2169	0	1	0	4	0	0	NA	NA	FALSE	0	0	NA	NA	FALSE
chr1	22420570	22420688	LOC105376856	-1691	0	1	0	4	0	0	NA	NA	FALSE	0	0	NA	NA	FALSE
chr1	22422230	22422348	LOC105376856	-3351	0	1	0	4	0	0	NA	NA	FALSE	0	0	NA	NA	FALSE
chr1	22451753	22452153	ZBTB40	0	0	0	1	2	0	0	NA	NA	FALSE	0	0	NA	NA	FALSE
chr1	22451817	22451935	ZBTB40	26	0	1	0	8	0	0	NA	NA	FALSE	0	0	NA	NA	FALSE
chr1	22452107	22452225	ZBTB40	316	0	1	0	8	0	0	NA	NA	FALSE	0	0	NA	NA	FALSE
chr1	22621809	22621927	MIR6127	11498	0	1	0	3	0	0	NA	NA	FALSE	0	0	NA	NA	FALSE
chr1	22636971	22637089	C1QA	406	0	1	0	5	0	0	NA	NA	FALSE	0	0	NA	NA	FALSE
chr1	22637701	22637819	C1QA	1136	0	1	0	8	0	0	NA	NA	FALSE	0	0	NA	NA	FALSE
chr1	22639210	22639328	C1QA	2645	0	1	0	3	0	0	NA	NA	FALSE	0	0	NA	NA	FALSE
chr1	22642148	22642266	C1QC	-1417	0	1	0	4	0	0	NA	NA	FALSE	0	0	NA	NA	FALSE
chr1	22654716	22654834	C1QB	1585	0	1	0	4	0	0	NA	NA	FALSE	0	0	NA	NA	FALSE
chr1	22665887	22666005	C1QB	12756	0	1	0	4	0	0	NA	NA	FALSE	0	0	NA	NA	FALSE
chr1	22674270	22674388	C1QB	21139	0	1	0	3	0	0	NA	NA	FALSE	0	0	NA	NA	FALSE
chr1	22698685	22698803	EPHB2	-12025	0	1	0	4	0	0	NA	NA	FALSE	0	0	NA	NA	FALSE
chr1	22702702	22703328	EPHB2	-7754	1	0	0	4	0	0	NA	NA	FALSE	0	0	NA	NA	FALSE
chr1	22704368	22704689	EPHB2	-6241	0	1	0	3	0	0	NA	NA	FALSE	0	0	NA	NA	FALSE
chr1	22709380	22709498	EPHB2	-1330	0	1	0	4	0	0	NA	NA	FALSE	0	0	NA	NA	FALSE
chr1	22710737	22711137	EPHB2	0	0	0	1	1	0	0	NA	NA	FALSE	0	0	NA	NA	FALSE
chr1	22710837	22713199	EPHB2	1181	0	1	0	22	0	0	NA	NA	FALSE	0	0	NA	NA	FALSE
chr1	22930445	22930563	LACTBL1	41812	0	1	0	4	0	0	NA	NA	FALSE	0	0	NA	NA	FALSE
chr1	22964322	22964440	LACTBL1	7935	0	1	0	3	0	0	NA	NA	FALSE	0	0	NA	NA	FALSE
chr1	22976545	22976663	LACTBL1	-4288	0	1	0	4	0	0	NA	NA	FALSE	0	0	NA	NA	FALSE
chr1	23645625	23646483	MDS2	18721	1	0	0	4	0	0	NA	NA	FALSE	0	0	NA	NA	FALSE
chr1	23743380	23743780	TCEB3	0	0	0	1	5	0	0	NA	NA	FALSE	0	0	NA	NA	FALSE
chr1	23751430	23751548	TCEB3	8124	0	1	0	5	1	0.2	-0.556	0.370602	TRUE	0	0	NA	NA	FALSE
chr1	23772253	23772371	TCEB3-AS1	5985	0	1	0	4	0	0	NA	NA	FALSE	0	0	NA	NA	FALSE
chr1	23778303	23778703	PITHD1	0	0	0	1	1	0	0	NA	NA	FALSE	0	0	NA	NA	FALSE
chr1	23778442	23778560	PITHD1	85	0	1	0	6	0	0	NA	NA	FALSE	0	0	NA	NA	FALSE
chr1	23790866	23790984	LYPLA2	137	0	1	0	4	0	0	NA	NA	FALSE	0	0	NA	NA	FALSE
chr1	23791053	23791453	LYPLA2	0	0	0	1	4	0	0	NA	NA	FALSE	0	0	NA	NA	FALSE
chr1	23791764	23791882	LYPLA2	668	0	1	0	6	0	0	NA	NA	FALSE	0	0	NA	NA	FALSE
chr1	23796884	23797002	GALE	2627	0	1	0	5	0	0	NA	NA	FALSE	0	0	NA	NA	FALSE
chr1	23798669	23798787	GALE	842	0	1	0	4	0	0	NA	NA	FALSE	0	0	NA	NA	FALSE
chr1	23800454	23800854	GALE	0	0	0	1	5	0	0	NA	NA	FALSE	0	0	NA	NA	FALSE
chr1	23959242	23959360	PNRC2	138	0	1	0	6	0	0	NA	NA	FALSE	0	0	NA	NA	FALSE
chr1	23959716	23960116	PNRC2	0	0	0	1	4	0	0	NA	NA	FALSE	0	0	NA	NA	FALSE
chr1	23980028	23980428	SRSF10	0	0	0	1	2	1	0.5	-1.643	6.09214e-06	TRUE	0	0	NA	NA	FALSE
chr1	23980065	23980183	SRSF10	339	0	1	0	6	0	0	NA	NA	FALSE	0	0	NA	NA	FALSE
chr1	24632779	24632897	SRRM1	-10173	0	1	0	4	0	0	NA	NA	FALSE	0	0	NA	NA	FALSE
chr1	24693826	24693957	SRRM1	50328	1	0	0	3	0	0	NA	NA	FALSE	0	0	NA	NA	FALSE
chr1	24745346	24745746	CLIC4	0	0	0	1	5	0	0	NA	NA	FALSE	0	0	NA	NA	FALSE
chr1	24830821	24830939	LOC105376876	-26201	0	1	0	4	0	0	NA	NA	FALSE	0	0	NA	NA	FALSE
chr1	24848037	24848155	LOC105376876	-8985	0	1	0	5	1	0.2	-1.169	0.000840025	TRUE	0	0	NA	NA	FALSE
chr1	24857809	24857927	LOC105376876	787	0	1	0	4	0	0	NA	NA	FALSE	0	0	NA	NA	FALSE
chr1	24862185	24862303	LOC105376876	5163	0	1	0	5	0	0	NA	NA	FALSE	0	0	NA	NA	FALSE
chr1	24886638	24886756	LOC105376876	29616	0	1	0	4	0	0	NA	NA	FALSE	0	0	NA	NA	FALSE
chr1	24887998	24888116	LOC105376876	30976	0	1	0	3	0	0	NA	NA	FALSE	0	0	NA	NA	FALSE
chr1	24898229	24898347	MIR6731	21128	0	1	0	5	0	0	NA	NA	FALSE	0	0	NA	NA	FALSE
chr1	24909581	24909853	MIR6731	9699	0	1	0	4	0	0	NA	NA	FALSE	0	0	NA	NA	FALSE
chr1	24931301	24931547	LOC105376878	-1029	1	0	0	5	1	0.2	-2.23	2.62433e-21	TRUE	0	0	NA	NA	FALSE
chr1	25166953	25167725	SYF2	65183	1	0	0	5	0	0	NA	NA	FALSE	0	0	NA	NA	FALSE
chr1	25217742	25217860	SYF2	14721	0	1	0	4	0	0	NA	NA	FALSE	0	0	NA	NA	FALSE
chr1	25239856	25239974	SYF2	-7393	0	1	0	4	0	0	NA	NA	FALSE	0	0	NA	NA	FALSE
chr1	25246447	25246565	RSRP1	1013	0	1	0	4	0	0	NA	NA	FALSE	0	0	NA	NA	FALSE
chr1	25247863	25247981	RSRP1	-403	0	1	0	3	0	0	NA	NA	FALSE	0	0	NA	NA	FALSE
chr1	25523662	25523780	LDLRAP1	-19858	0	1	0	5	0	0	NA	NA	FALSE	0	0	NA	NA	FALSE
chr1	25541978	25542193	LDLRAP1	-1494	0	1	0	5	0	0	NA	NA	FALSE	0	0	NA	NA	FALSE
chr1	25543387	25543505	LDLRAP1	-133	0	1	0	9	0	0	NA	NA	FALSE	0	0	NA	NA	FALSE
chr1	25543534	25543934	LDLRAP1	0	0	0	1	1	0	0	NA	NA	FALSE	0	0	NA	NA	FALSE
chr1	25543924	25544042	LDLRAP1	396	0	1	0	9	0	0	NA	NA	FALSE	0	0	NA	NA	FALSE
chr1	25549828	25549946	LDLRAP1	996	0	1	0	3	0	0	NA	NA	FALSE	0	0	NA	NA	FALSE
chr1	25556586	25556704	LDLRAP1	7754	0	1	0	5	0	0	NA	NA	FALSE	0	0	NA	NA	FALSE
chr1	25566721	25566839	LDLRAP1	17889	0	1	0	6	0	0	NA	NA	FALSE	0	0	NA	NA	FALSE
chr1	25568394	25568512	LDLRAP1	19562	0	1	0	4	0	0	NA	NA	FALSE	0	0	NA	NA	FALSE
chr1	25571148	25571266	LDLRAP1	22316	0	1	0	5	0	0	NA	NA	FALSE	0	0	NA	NA	FALSE
chr1	25572543	25572661	LDLRAP1	23711	0	1	0	3	0	0	NA	NA	FALSE	0	0	NA	NA	FALSE
chr1	25584444	25584562	MAN1C1	-32316	0	1	0	4	0	0	NA	NA	FALSE	0	0	NA	NA	FALSE
chr1	25590298	25590416	MAN1C1	-26462	0	1	0	4	0	0	NA	NA	FALSE	0	0	NA	NA	FALSE
chr1	25791949	25792092	SEPN1	-8155	1	0	0	3	0	0	NA	NA	FALSE	0	0	NA	NA	FALSE
chr1	25800104	25800504	SEPN1	0	0	0	1	3	0	0	NA	NA	FALSE	0	0	NA	NA	FALSE
chr1	25804381	25804499	SEPN1	4265	0	1	0	3	1	0.333	-1.084	0.000761765	TRUE	0	0	NA	NA	FALSE
chr1	25805382	25805500	SEPN1	5266	0	1	0	4	0	0	NA	NA	FALSE	0	0	NA	NA	FALSE
chr1	25810920	25811038	MTFR1L	-8926	0	1	0	5	0	0	NA	NA	FALSE	0	0	NA	NA	FALSE
chr1	25814183	25814301	MTFR1L	-5663	0	1	0	5	1	0.2	-0.909	0.00864833	TRUE	0	0	NA	NA	FALSE
chr1	25818236	25818354	MTFR1L	-1610	0	1	0	3	0	0	NA	NA	FALSE	0	0	NA	NA	FALSE
chr1	25819781	25819899	MTFR1L	-65	0	1	0	5	0	0	NA	NA	FALSE	0	0	NA	NA	FALSE
chr1	25820662	25820780	MTFR1L	-106	0	1	0	4	0	0	NA	NA	FALSE	0	0	NA	NA	FALSE
chr1	25859278	25859396	AUNIP	121	0	1	0	5	0	0	NA	NA	FALSE	0	0	NA	NA	FALSE
chr1	25863546	25863664	AUNIP	-4147	0	1	0	5	0	0	NA	NA	FALSE	0	0	NA	NA	FALSE
chr1	25875209	25875327	PAQR7	600	0	1	0	5	0	0	NA	NA	FALSE	0	0	NA	NA	FALSE
chr1	25889617	25889735	PAQR7	-12969	0	1	0	4	0	0	NA	NA	FALSE	0	0	NA	NA	FALSE
chr1	25895524	25895642	STMN1	10570	0	1	0	4	0	0	NA	NA	FALSE	0	0	NA	NA	FALSE
chr1	25905892	25906010	STMN1	202	0	1	0	7	0	0	NA	NA	FALSE	0	0	NA	NA	FALSE
chr1	25906119	25906519	STMN1	0	0	0	1	1	0	0	NA	NA	FALSE	0	0	NA	NA	FALSE
chr1	25906491	25906609	LOC105376885	1	0	1	0	7	0	0	NA	NA	FALSE	0	0	NA	NA	FALSE
chr1	26017425	26017543	LOC101928216	4176	0	1	0	4	0	0	NA	NA	FALSE	0	0	NA	NA	FALSE
chr1	26036077	26036195	LOC101928216	-4959	0	1	0	4	0	0	NA	NA	FALSE	1	0.25	0.756	0.000455952	TRUE
chr1	26045914	26046032	SLC30A2	165	0	1	0	6	0	0	NA	NA	FALSE	0	0	NA	NA	FALSE
chr1	26070659	26070777	TRIM63	-3084	0	1	0	3	0	0	NA	NA	FALSE	0	0	NA	NA	FALSE
chr1	26161256	26162467	FAM110D	2842	1	0	0	10	0	0	NA	NA	FALSE	0	0	NA	NA	FALSE
chr1	26305734	26306704	UBXN11	485	1	0	0	10	0	0	NA	NA	FALSE	0	0	NA	NA	FALSE
chr1	26345853	26346182	AIM1L	4799	1	0	0	6	0	0	NA	NA	FALSE	0	0	NA	NA	FALSE
chr1	26432227	26432627	DHDDS	0	0	0	1	6	3	0.5	-2.186	1.20735e-12	TRUE	0	0	NA	NA	FALSE
chr1	26468012	26468130	LOC101928324	-534	0	1	0	3	0	0	NA	NA	FALSE	0	0	NA	NA	FALSE
chr1	26472047	26472165	HMGN2	-304	0	1	0	8	0	0	NA	NA	FALSE	1	0.125	0.588	0.0164018	TRUE
chr1	26472384	26472784	HMGN2	0	0	0	1	1	0	0	NA	NA	FALSE	0	0	NA	NA	FALSE
chr1	26472410	26473409	HMGN2	499	0	1	0	13	0	0	NA	NA	FALSE	1	0.077	0.588	0.0164018	TRUE
chr1	26500028	26501818	HMGN2	28513	0	1	0	20	0	0	NA	NA	FALSE	0	0	NA	NA	FALSE
chr1	26619719	26621992	LOC105376888	-61647	1	0	0	19	0	0	NA	NA	FALSE	1	0.053	0.929	0.00439095	TRUE
chr1	26695601	26696001	ARID1A	0	0	0	1	3	0	0	NA	NA	FALSE	1	0.333	0.769	0.000312792	TRUE
chr1	26696030	26696536	ARID1A	253	1	0	0	8	0	0	NA	NA	FALSE	0	0	NA	NA	FALSE
chr1	26696641	26697464	ARID1A	1022	1	0	0	14	0	0	NA	NA	FALSE	0	0	NA	NA	FALSE
chr1	26697513	26697719	ARID1A	1586	1	0	0	9	0	0	NA	NA	FALSE	0	0	NA	NA	FALSE
chr1	26698015	26698762	ARID1A	2358	1	0	0	6	0	0	NA	NA	FALSE	0	0	NA	NA	FALSE
chr1	26788093	26788493	PIGV	0	0	0	1	1	0	0	NA	NA	FALSE	0	0	NA	NA	FALSE
chr1	26788187	26788556	PIGV	184	1	0	0	10	0	0	NA	NA	FALSE	0	0	NA	NA	FALSE
chr1	26788654	26789422	PIGV	851	1	0	0	14	0	0	NA	NA	FALSE	0	0	NA	NA	FALSE
chr1	26887247	26887365	GPN2	3072	0	1	0	3	0	0	NA	NA	FALSE	0	0	NA	NA	FALSE
chr1	26889977	26890377	GPN2	0	0	0	1	5	0	0	NA	NA	FALSE	0	0	NA	NA	FALSE
chr1	26914515	26914633	NR0B2	-498	0	1	0	3	0	0	NA	NA	FALSE	0	0	NA	NA	FALSE
chr1	26967028	26967146	KDF1	-6603	0	1	0	4	0	0	NA	NA	FALSE	0	0	NA	NA	FALSE
chr1	26993717	26993835	TRNP1	73	0	1	0	6	0	0	NA	NA	FALSE	1	0.167	0.685	0.013437	TRUE
chr1	26995286	26995404	TRNP1	1642	0	1	0	4	0	0	NA	NA	FALSE	0	0	NA	NA	FALSE
chr1	26997755	26997873	TRNP1	4111	0	1	0	4	0	0	NA	NA	FALSE	0	0	NA	NA	FALSE
chr1	26999698	26999816	TRNP1	6054	0	1	0	4	0	0	NA	NA	FALSE	0	0	NA	NA	FALSE
chr1	27031197	27032269	LOC101928391	-24	1	0	0	8	0	0	NA	NA	FALSE	0	0	NA	NA	FALSE
chr1	27033200	27033749	LOC101928391	1717	1	0	0	5	0	0	NA	NA	FALSE	0	0	NA	NA	FALSE
chr1	27152688	27152935	SLC9A1	1234	1	0	0	2	0	0	NA	NA	FALSE	0	0	NA	NA	FALSE
chr1	27153198	27153775	SLC9A1	559	1	0	0	5	0	0	NA	NA	FALSE	0	0	NA	NA	FALSE
chr1	27154484	27155130	SLC9A1	323	1	0	0	6	0	0	NA	NA	FALSE	0	0	NA	NA	FALSE
chr1	27154826	27155226	SLC9A1	0	0	0	1	1	0	0	NA	NA	FALSE	0	0	NA	NA	FALSE
chr1	27203355	27203568	LOC105376890	31033	1	0	0	4	0	0	NA	NA	FALSE	0	0	NA	NA	FALSE
chr1	27234597	27234997	WDTC1	0	0	0	1	5	0	0	NA	NA	FALSE	0	0	NA	NA	FALSE
chr1	27284798	27284916	TMEM222	-37287	0	1	0	3	0	0	NA	NA	FALSE	0	0	NA	NA	FALSE
chr1	27292228	27292346	TMEM222	-29857	0	1	0	4	0	0	NA	NA	FALSE	0	0	NA	NA	FALSE
chr1	27296812	27296930	TMEM222	-25273	0	1	0	4	0	0	NA	NA	FALSE	0	0	NA	NA	FALSE
chr1	27300917	27301035	TMEM222	-21168	0	1	0	5	0	0	NA	NA	FALSE	0	0	NA	NA	FALSE
chr1	27303582	27303700	TMEM222	-18503	0	1	0	3	0	0	NA	NA	FALSE	0	0	NA	NA	FALSE
chr1	27306908	27307026	TMEM222	-15177	0	1	0	4	0	0	NA	NA	FALSE	0	0	NA	NA	FALSE
chr1	27308101	27308219	TMEM222	-13984	0	1	0	4	0	0	NA	NA	FALSE	0	0	NA	NA	FALSE
chr1	27322139	27322257	TMEM222	16	0	1	0	6	0	0	NA	NA	FALSE	0	0	NA	NA	FALSE
chr1	27322170	27322570	TMEM222	0	0	0	1	1	0	0	NA	NA	FALSE	0	0	NA	NA	FALSE
chr1	27332902	27333020	SYTL1	-9030	0	1	0	5	0	0	NA	NA	FALSE	0	0	NA	NA	FALSE
chr1	27339380	27339498	SYTL1	-2552	0	1	0	4	0	0	NA	NA	FALSE	0	0	NA	NA	FALSE
chr1	27341429	27341547	SYTL1	-503	0	1	0	6	0	0	NA	NA	FALSE	0	0	NA	NA	FALSE
chr1	27341952	27342352	SYTL1	0	0	0	1	3	0	0	NA	NA	FALSE	0	0	NA	NA	FALSE
chr1	27342354	27342472	SYTL1	360	0	1	0	3	0	0	NA	NA	FALSE	0	0	NA	NA	FALSE
chr1	27342499	27342617	SYTL1	505	0	1	0	3	0	0	NA	NA	FALSE	0	0	NA	NA	FALSE
chr1	27349742	27349860	SYTL1	7748	0	1	0	8	0	0	NA	NA	FALSE	0	0	NA	NA	FALSE
chr1	27349948	27350066	SYTL1	7954	0	1	0	8	0	0	NA	NA	FALSE	0	0	NA	NA	FALSE
chr1	27350882	27351000	SYTL1	8888	0	1	0	9	0	0	NA	NA	FALSE	0	0	NA	NA	FALSE
chr1	27351412	27351530	SYTL1	9418	0	1	0	10	0	0	NA	NA	FALSE	0	0	NA	NA	FALSE
chr1	27356548	27356666	MAP3K6	8195	0	1	0	6	0	0	NA	NA	FALSE	0	0	NA	NA	FALSE
chr1	27357627	27357745	MAP3K6	7116	0	1	0	6	0	0	NA	NA	FALSE	0	0	NA	NA	FALSE
chr1	27359773	27359891	MAP3K6	4970	0	1	0	3	0	0	NA	NA	FALSE	0	0	NA	NA	FALSE
chr1	27360690	27360808	MAP3K6	4053	0	1	0	5	0	0	NA	NA	FALSE	0	0	NA	NA	FALSE
chr1	27366651	27367051	MAP3K6	0	0	0	1	4	0	0	NA	NA	FALSE	0	0	NA	NA	FALSE
chr1	27519110	27520011	LOC105376892	-362	1	0	0	7	0	0	NA	NA	FALSE	0	0	NA	NA	FALSE
chr1	27520726	27521020	LOC105376892	951	1	0	0	5	0	0	NA	NA	FALSE	0	0	NA	NA	FALSE
chr1	27521278	27521822	LOC105376892	1628	1	0	0	12	0	0	NA	NA	FALSE	0	0	NA	NA	FALSE
chr1	27521837	27522947	LOC105376892	2470	1	0	0	18	0	0	NA	NA	FALSE	1	0.056	0.611	0.0257258	TRUE
chr1	27523008	27523471	LOC105376892	3317	1	0	0	8	0	0	NA	NA	FALSE	1	0.125	0.611	0.0257258	TRUE
chr1	27584569	27584804	AHDC1	-6362	1	0	0	5	0	0	NA	NA	FALSE	0	0	NA	NA	FALSE
chr1	27603851	27604251	AHDC1	0	0	0	1	3	0	0	NA	NA	FALSE	0	0	NA	NA	FALSE
chr1	27686361	27686479	IFI6	-14207	0	1	0	3	0	0	NA	NA	FALSE	0	0	NA	NA	FALSE
chr1	27725703	27725821	FAM76A	-216	0	1	0	5	0	0	NA	NA	FALSE	0	0	NA	NA	FALSE
chr1	27725874	27726274	FAM76A	0	0	0	1	4	0	0	NA	NA	FALSE	0	0	NA	NA	FALSE
chr1	27744705	27744823	FAM76A	18737	0	1	0	3	0	0	NA	NA	FALSE	0	0	NA	NA	FALSE
chr1	27830699	27831099	PPP1R8	0	0	0	1	1	0	0	NA	NA	FALSE	0	0	NA	NA	FALSE
chr1	27830776	27830894	PPP1R8	17	0	1	0	4	0	0	NA	NA	FALSE	0	0	NA	NA	FALSE
chr1	28208994	28209112	PTAFR	-15117	0	1	0	4	0	0	NA	NA	FALSE	0	0	NA	NA	FALSE
chr1	28232725	28233125	DNAJC8	0	0	0	1	6	0	0	NA	NA	FALSE	0	0	NA	NA	FALSE
chr1	28259330	28259448	SESN2	-62	0	1	0	4	0	0	NA	NA	FALSE	0	0	NA	NA	FALSE
chr1	28259414	28259814	SESN2	0	0	0	1	4	0	0	NA	NA	FALSE	0	0	NA	NA	FALSE
chr1	28273322	28273440	SESN2	13930	0	1	0	9	0	0	NA	NA	FALSE	0	0	NA	NA	FALSE
chr1	28273631	28273884	SESN2	14306	1	0	0	10	0	0	NA	NA	FALSE	0	0	NA	NA	FALSE
chr1	28369581	28370785	PHACTR4	472	1	0	0	15	0	0	NA	NA	FALSE	0	0	NA	NA	FALSE
chr1	28602966	28603084	RAB42	10531	0	1	0	3	0	0	NA	NA	FALSE	0	0	NA	NA	FALSE
chr1	28642755	28643155	TAF12	0	0	0	1	2	0	0	NA	NA	FALSE	0	0	NA	NA	FALSE
chr1	28643129	28643247	LOC105378616	15	0	1	0	4	1	0.25	-0.734	0.0979521	TRUE	0	0	NA	NA	FALSE
chr1	28668678	28669078	GMEB1	0	0	0	1	1	0	0	NA	NA	FALSE	0	0	NA	NA	FALSE
chr1	28668687	28670061	GMEB1	589	0	1	0	14	0	0	NA	NA	FALSE	0	0	NA	NA	FALSE
chr1	29181555	29181673	SRSF4	311	0	1	0	5	0	0	NA	NA	FALSE	0	0	NA	NA	FALSE
chr1	29181570	29181970	SRSF4	0	0	0	1	2	0	0	NA	NA	FALSE	0	0	NA	NA	FALSE
chr1	29197650	29197768	SRSF4	-15584	0	1	0	4	1	0.25	-0.391	0.71565	TRUE	0	0	NA	NA	FALSE
chr1	29202988	29203106	LOC107985739	-20219	0	1	0	3	0	0	NA	NA	FALSE	0	0	NA	NA	FALSE
chr1	29230614	29231014	MECR	0	0	0	1	2	0	0	NA	NA	FALSE	0	0	NA	NA	FALSE
chr1	29230991	29231109	MECR	-92	0	1	0	3	0	0	NA	NA	FALSE	0	0	NA	NA	FALSE
chr1	29236420	29236820	PTPRU	0	0	0	1	4	0	0	NA	NA	FALSE	0	0	NA	NA	FALSE
chr1	29240403	29240521	PTPRU	3922	0	1	0	5	0	0	NA	NA	FALSE	0	0	NA	NA	FALSE
chr1	29280897	29281169	PTPRU	20886	1	0	0	3	0	0	NA	NA	FALSE	0	0	NA	NA	FALSE
chr1	30685248	30685366	MATN1-AS1	-33464	0	1	0	5	0	0	NA	NA	FALSE	0	0	NA	NA	FALSE
chr1	30708232	30708350	MATN1-AS1	-10480	0	1	0	3	0	0	NA	NA	FALSE	0	0	NA	NA	FALSE
chr1	30711668	30711786	MATN1-AS1	-7044	0	1	0	4	0	0	NA	NA	FALSE	0	0	NA	NA	FALSE
chr1	30715351	30715469	MATN1-AS1	-3361	0	1	0	3	0	0	NA	NA	FALSE	0	0	NA	NA	FALSE
chr1	30719340	30719458	MATN1-AS1	628	0	1	0	7	0	0	NA	NA	FALSE	0	0	NA	NA	FALSE
chr1	30722016	30722134	MATN1	1510	0	1	0	3	0	0	NA	NA	FALSE	0	0	NA	NA	FALSE
chr1	30724318	30724436	MATN1	-792	0	1	0	4	0	0	NA	NA	FALSE	0	0	NA	NA	FALSE
chr1	30732678	30732796	MIR4420	6495	0	1	0	5	0	0	NA	NA	FALSE	0	0	NA	NA	FALSE
chr1	30737900	30738018	MIR4420	1273	0	1	0	6	0	0	NA	NA	FALSE	0	0	NA	NA	FALSE
chr1	30747742	30747860	LOC105378620	5077	0	1	0	4	0	0	NA	NA	FALSE	0	0	NA	NA	FALSE
chr1	30752152	30752270	LOC105378620	667	0	1	0	4	0	0	NA	NA	FALSE	0	0	NA	NA	FALSE
chr1	30871446	30871711	SDC3	7377	1	0	0	4	0	0	NA	NA	FALSE	0	0	NA	NA	FALSE
chr1	30908446	30908846	SDC3	0	0	0	1	5	0	0	NA	NA	FALSE	0	0	NA	NA	FALSE
chr1	30929527	30929645	SNORD103A	6190	0	1	0	4	0	0	NA	NA	FALSE	0	0	NA	NA	FALSE
chr1	31155415	31155533	LOC107984935	408	0	1	0	6	0	0	NA	NA	FALSE	0	0	NA	NA	FALSE
chr1	31170975	31171093	LOC107984935	15968	0	1	0	3	0	0	NA	NA	FALSE	0	0	NA	NA	FALSE
chr1	31182592	31182710	LOC107984935	27585	0	1	0	4	0	0	NA	NA	FALSE	0	0	NA	NA	FALSE
chr1	31184091	31184209	LOC107984935	29084	0	1	0	3	0	0	NA	NA	FALSE	0	0	NA	NA	FALSE
chr1	31239594	31239994	NKAIN1	0	0	0	1	5	0	0	NA	NA	FALSE	0	0	NA	NA	FALSE
chr1	31444542	31444842	LOC105378625	-3565	1	0	0	3	0	0	NA	NA	FALSE	0	0	NA	NA	FALSE
chr1	31618254	31618372	HCRTR1	-3	0	1	0	6	0	0	NA	NA	FALSE	1	0.167	0.632	0.0291033	TRUE
chr1	31619504	31619622	HCRTR1	1247	0	1	0	4	0	0	NA	NA	FALSE	0	0	NA	NA	FALSE
chr1	31633256	31633374	PEF1	8308	0	1	0	4	0	0	NA	NA	FALSE	0	0	NA	NA	FALSE
chr1	31635363	31635481	PEF1	6201	0	1	0	3	1	0.333	-1.665	5.17825e-09	TRUE	0	0	NA	NA	FALSE
chr1	31644130	31644617	LOC107985471	179	1	0	0	5	0	0	NA	NA	FALSE	0	0	NA	NA	FALSE
chr1	31644578	31644978	PEF1	0	0	0	1	5	0	0	NA	NA	FALSE	0	0	NA	NA	FALSE
chr1	31663961	31664079	LOC101929444	-6049	0	1	0	4	0	0	NA	NA	FALSE	0	0	NA	NA	FALSE
chr1	31666225	31666343	LOC101929444	-3785	0	1	0	4	0	0	NA	NA	FALSE	0	0	NA	NA	FALSE
chr1	31670196	31670314	LOC101929444	186	0	1	0	6	0	0	NA	NA	FALSE	0	0	NA	NA	FALSE
chr1	31679955	31680073	COL16A1	8889	0	1	0	7	0	0	NA	NA	FALSE	0	0	NA	NA	FALSE
chr1	31681648	31681766	COL16A1	7196	0	1	0	4	0	0	NA	NA	FALSE	0	0	NA	NA	FALSE
chr1	31788001	31789771	ADGRB2	-24823	1	0	0	18	0	0	NA	NA	FALSE	0	0	NA	NA	FALSE
chr1	32063524	32063642	TMEM39B	-8447	0	1	0	3	0	0	NA	NA	FALSE	0	0	NA	NA	FALSE
chr1	32072794	32073731	TMEM39B	-335	0	1	0	8	0	0	NA	NA	FALSE	0	0	NA	NA	FALSE
chr1	32072865	32073265	TMEM39B	0	0	0	1	1	0	0	NA	NA	FALSE	0	0	NA	NA	FALSE
chr1	32104329	32104447	KPNA6	-3654	0	1	0	4	0	0	NA	NA	FALSE	0	0	NA	NA	FALSE
chr1	32179624	32180024	TXLNA	0	0	0	1	3	0	0	NA	NA	FALSE	0	0	NA	NA	FALSE
chr1	32179995	32180113	TXLNA	67	0	1	0	6	0	0	NA	NA	FALSE	0	0	NA	NA	FALSE
chr1	32201042	32201160	CCDC28B	377	0	1	0	6	0	0	NA	NA	FALSE	0	0	NA	NA	FALSE
chr1	32215742	32215860	DCDC2B	4864	0	1	0	4	0	0	NA	NA	FALSE	0	0	NA	NA	FALSE
chr1	32222045	32222445	TMEM234	0	0	0	1	5	1	0.2	-1.417	0.00721987	TRUE	0	0	NA	NA	FALSE
chr1	32222303	32222703	EIF3I	0	0	0	1	5	1	0.2	-1.417	0.00721987	TRUE	0	0	NA	NA	FALSE
chr1	32228929	32229047	TMEM234	-6617	0	1	0	4	0	0	NA	NA	FALSE	0	0	NA	NA	FALSE
chr1	32235044	32235162	MTMR9LP	6607	0	1	0	3	0	0	NA	NA	FALSE	0	0	NA	NA	FALSE
chr1	32239472	32239590	MTMR9LP	2179	0	1	0	4	0	0	NA	NA	FALSE	0	0	NA	NA	FALSE
chr1	32240322	32240440	MTMR9LP	1329	0	1	0	5	0	0	NA	NA	FALSE	0	0	NA	NA	FALSE
chr1	32241250	32241368	MTMR9LP	401	0	1	0	6	0	0	NA	NA	FALSE	0	0	NA	NA	FALSE
chr1	32292040	32292440	HDAC1	0	0	0	1	1	0	0	NA	NA	FALSE	0	0	NA	NA	FALSE
chr1	32292106	32293021	HDAC1	457	1	0	0	7	0	0	NA	NA	FALSE	1	0.143	0.626	0.0107019	TRUE
chr1	32335250	32335368	MARCKSL1	930	0	1	0	5	0	0	NA	NA	FALSE	0	0	NA	NA	FALSE
chr1	32335932	32336332	MARCKSL1	0	0	0	1	2	0	0	NA	NA	FALSE	0	0	NA	NA	FALSE
chr1	32336299	32336417	MARCKSL1	-119	0	1	0	6	0	0	NA	NA	FALSE	0	0	NA	NA	FALSE
chr1	32337957	32338075	MARCKSL1	-1777	0	1	0	4	0	0	NA	NA	FALSE	0	0	NA	NA	FALSE
chr1	32351280	32351398	LOC105378629	56	0	1	0	6	0	0	NA	NA	FALSE	0	0	NA	NA	FALSE
chr1	32352152	32352270	LOC105378629	-416	0	1	0	5	0	0	NA	NA	FALSE	0	0	NA	NA	FALSE
chr1	32357280	32357398	FAM229A	4904	0	1	0	3	0	0	NA	NA	FALSE	0	0	NA	NA	FALSE
chr1	32361601	32361719	FAM229A	583	0	1	0	9	0	0	NA	NA	FALSE	0	0	NA	NA	FALSE
chr1	32362105	32362223	FAM229A	79	0	1	0	9	0	0	NA	NA	FALSE	0	0	NA	NA	FALSE
chr1	32390997	32391115	BSDC1	3375	0	1	0	3	0	0	NA	NA	FALSE	0	0	NA	NA	FALSE
chr1	32394134	32394534	BSDC1	0	0	0	1	2	0	0	NA	NA	FALSE	0	0	NA	NA	FALSE
chr1	32394416	32394534	BSDC1	-14	0	1	0	5	0	0	NA	NA	FALSE	0	0	NA	NA	FALSE
chr1	32400950	32401068	BSDC1	-6548	0	1	0	6	0	0	NA	NA	FALSE	0	0	NA	NA	FALSE
chr1	32781054	32781156	KIAA1522	13035	1	0	0	4	0	0	NA	NA	FALSE	0	0	NA	NA	FALSE
chr1	32817050	32817450	YARS	0	0	0	1	4	1	0.25	-0.633	0.0706131	TRUE	0	0	NA	NA	FALSE
chr1	32872756	32872874	FNDC5	-323	0	1	0	4	0	0	NA	NA	FALSE	0	0	NA	NA	FALSE
chr1	32876765	32876883	LOC105378631	518	0	1	0	4	0	0	NA	NA	FALSE	0	0	NA	NA	FALSE
chr1	32886684	32886802	HPCA	247	0	1	0	5	0	0	NA	NA	FALSE	0	0	NA	NA	FALSE
chr1	32892980	32893098	HPCA	5967	0	1	0	4	0	0	NA	NA	FALSE	0	0	NA	NA	FALSE
chr1	32893428	32893828	HPCA	0	0	0	1	4	0	0	NA	NA	FALSE	0	0	NA	NA	FALSE
chr1	32901068	32901468	TMEM54	0	0	0	1	1	0	0	NA	NA	FALSE	0	0	NA	NA	FALSE
chr1	32901078	32901196	TMEM54	215	0	1	0	6	0	0	NA	NA	FALSE	0	0	NA	NA	FALSE
chr1	33055255	33055373	AK2	-18403	0	1	0	3	0	0	NA	NA	FALSE	0	0	NA	NA	FALSE
chr1	33080997	33081115	LOC105378635	46	0	1	0	7	0	0	NA	NA	FALSE	0	0	NA	NA	FALSE
chr1	33086480	33086598	AZIN2	4270	0	1	0	4	0	0	NA	NA	FALSE	0	0	NA	NA	FALSE
chr1	33095131	33095249	AZIN2	12921	0	1	0	4	0	0	NA	NA	FALSE	0	0	NA	NA	FALSE
chr1	33099300	33099418	AZIN2	17090	0	1	0	3	0	0	NA	NA	FALSE	0	0	NA	NA	FALSE
chr1	33119872	33119990	AZIN2	37662	0	1	0	5	0	0	NA	NA	FALSE	0	0	NA	NA	FALSE
chr1	33256425	33256825	ZNF362	0	0	0	1	5	0	0	NA	NA	FALSE	0	0	NA	NA	FALSE
chr1	33272256	33272372	ZNF362	2590	1	0	0	7	0	0	NA	NA	FALSE	0	0	NA	NA	FALSE
chr1	33455950	33456068	ZSCAN20	-16581	0	1	0	4	0	0	NA	NA	FALSE	0	0	NA	NA	FALSE
chr1	33462773	33462891	ZSCAN20	-9758	0	1	0	3	0	0	NA	NA	FALSE	0	0	NA	NA	FALSE
chr1	33472384	33472502	ZSCAN20	-147	0	1	0	4	0	0	NA	NA	FALSE	0	0	NA	NA	FALSE
chr1	33472550	33472950	ZSCAN20	0	0	0	1	4	0	0	NA	NA	FALSE	0	0	NA	NA	FALSE
chr1	33500663	33500781	ZSCAN20	20411	0	1	0	3	0	0	NA	NA	FALSE	0	0	NA	NA	FALSE
chr1	33971586	33971731	CSMD2-AS1	102703	1	0	0	4	0	0	NA	NA	FALSE	0	0	NA	NA	FALSE
chr1	34156867	34156985	CSMD2	8171	0	1	0	3	0	0	NA	NA	FALSE	0	0	NA	NA	FALSE
chr1	34163695	34163813	CSMD2	1343	0	1	0	5	0	0	NA	NA	FALSE	0	0	NA	NA	FALSE
chr1	34165258	34165376	CSMD2	-43	0	1	0	4	0	0	NA	NA	FALSE	0	0	NA	NA	FALSE
chr1	34177368	34177486	C1orf94	476	0	1	0	3	0	0	NA	NA	FALSE	0	0	NA	NA	FALSE
chr1	34742798	34742916	GJB5	-11919	0	1	0	3	0	0	NA	NA	FALSE	0	0	NA	NA	FALSE
chr1	34760042	34760160	GJB4	302	0	1	0	5	0	0	NA	NA	FALSE	0	0	NA	NA	FALSE
chr1	34775112	34775230	GJB3	-6017	0	1	0	4	0	0	NA	NA	FALSE	1	0.25	0.935	0.00499809	TRUE
chr1	34786576	34786694	GJB3	4326	0	1	0	4	0	0	NA	NA	FALSE	0	0	NA	NA	FALSE
chr1	34788245	34788363	GJA4	-4653	0	1	0	4	0	0	NA	NA	FALSE	0	0	NA	NA	FALSE
chr1	34797247	34797365	LOC105378642	2087	0	1	0	4	0	0	NA	NA	FALSE	0	0	NA	NA	FALSE
chr1	34825586	34825704	LOC105378642	21087	0	1	0	6	0	0	NA	NA	FALSE	0	0	NA	NA	FALSE
chr1	34843495	34843613	LOC105378642	3178	0	1	0	3	0	0	NA	NA	FALSE	0	0	NA	NA	FALSE
chr1	34852719	34852837	SMIM12	4697	0	1	0	3	0	0	NA	NA	FALSE	0	0	NA	NA	FALSE
chr1	34859844	34859962	SMIM12	-83	0	1	0	4	0	0	NA	NA	FALSE	0	0	NA	NA	FALSE
chr1	34866467	34866585	SMIM12	-6706	0	1	0	6	0	0	NA	NA	FALSE	0	0	NA	NA	FALSE
chr1	34983746	34985347	TMEM35B	801	1	0	0	14	0	0	NA	NA	FALSE	0	0	NA	NA	FALSE
chr1	35268602	35269002	ZMYM4	0	0	0	1	4	0	0	NA	NA	FALSE	0	0	NA	NA	FALSE
chr1	35268966	35269812	ZMYM4	340	1	0	0	7	0	0	NA	NA	FALSE	0	0	NA	NA	FALSE
chr1	35557094	35557494	KIAA0319L	0	0	0	1	3	0	0	NA	NA	FALSE	0	0	NA	NA	FALSE
chr1	35557199	35557317	KIAA0319L	132	0	1	0	10	0	0	NA	NA	FALSE	0	0	NA	NA	FALSE
chr1	35557628	35557746	KIAA0319L	-17	0	1	0	10	0	0	NA	NA	FALSE	0	0	NA	NA	FALSE
chr1	35557714	35558114	NCDN	0	0	0	1	2	0	0	NA	NA	FALSE	0	0	NA	NA	FALSE
chr1	35558338	35558456	NCDN	606	0	1	0	6	0	0	NA	NA	FALSE	0	0	NA	NA	FALSE
chr1	35564763	35564881	TFAP2E	-6244	0	1	0	4	0	0	NA	NA	FALSE	0	0	NA	NA	FALSE
chr1	35569054	35569172	TFAP2E	-1953	0	1	0	3	0	0	NA	NA	FALSE	0	0	NA	NA	FALSE
chr1	35577250	35577368	LOC105378645	1549	0	1	0	11	0	0	NA	NA	FALSE	0	0	NA	NA	FALSE
chr1	35577718	35577836	LOC105378645	1081	0	1	0	9	0	0	NA	NA	FALSE	0	0	NA	NA	FALSE
chr1	35717755	35719189	C1orf216	717	1	0	0	12	0	0	NA	NA	FALSE	0	0	NA	NA	FALSE
chr1	35769678	35770078	CLSPN	0	0	0	1	3	0	0	NA	NA	FALSE	0	0	NA	NA	FALSE
chr1	35769998	35770116	CLSPN	-72	0	1	0	4	0	0	NA	NA	FALSE	0	0	NA	NA	FALSE
chr1	35808213	35809491	AGO4	522	0	1	0	10	0	0	NA	NA	FALSE	0	0	NA	NA	FALSE
chr1	35883194	35884394	AGO1	561	1	0	0	14	0	0	NA	NA	FALSE	0	0	NA	NA	FALSE
chr1	36082283	36082401	TEKT2	-1732	0	1	0	4	0	0	NA	NA	FALSE	0	0	NA	NA	FALSE
chr1	36083992	36084110	TEKT2	-23	0	1	0	5	0	0	NA	NA	FALSE	0	0	NA	NA	FALSE
chr1	36084805	36084923	TEKT2	632	0	1	0	4	0	0	NA	NA	FALSE	0	0	NA	NA	FALSE
chr1	36087314	36087432	ADPRHL2	-1478	0	1	0	8	0	0	NA	NA	FALSE	0	0	NA	NA	FALSE
chr1	36087881	36087999	ADPRHL2	-911	0	1	0	6	0	0	NA	NA	FALSE	0	0	NA	NA	FALSE
chr1	36088731	36088849	ADPRHL2	-61	0	1	0	6	0	0	NA	NA	FALSE	0	0	NA	NA	FALSE
chr1	36088793	36089193	ADPRHL2	0	0	0	1	2	0	0	NA	NA	FALSE	0	0	NA	NA	FALSE
chr1	36096724	36096842	ADPRHL2	7899	0	1	0	8	0	0	NA	NA	FALSE	0	0	NA	NA	FALSE
chr1	36097231	36097349	ADPRHL2	8406	0	1	0	8	0	0	NA	NA	FALSE	0	0	NA	NA	FALSE
chr1	36099722	36099840	ADPRHL2	10897	0	1	0	4	0	0	NA	NA	FALSE	0	0	NA	NA	FALSE
chr1	36148931	36149514	TRAPPC3	292	1	0	0	6	0	0	NA	NA	FALSE	0	0	NA	NA	FALSE
chr1	36156058	36156458	MAP7D1	0	0	0	1	4	0	0	NA	NA	FALSE	0	0	NA	NA	FALSE
chr1	36173050	36173240	MAP7D1	16996	1	0	0	5	1	0.2	-0.108	0.931552	TRUE	0	0	NA	NA	FALSE
chr1	36446459	36446577	OSCP1	3815	0	1	0	3	0	0	NA	NA	FALSE	0	0	NA	NA	FALSE
chr1	36450133	36450533	OSCP1	0	0	0	1	3	0	0	NA	NA	FALSE	0	0	NA	NA	FALSE
chr1	36464135	36464253	MRPS15	245	0	1	0	5	0	0	NA	NA	FALSE	0	0	NA	NA	FALSE
chr1	36472056	36472174	CSF3R	1735	0	1	0	5	0	0	NA	NA	FALSE	0	0	NA	NA	FALSE
chr1	36474224	36474342	CSF3R	-433	0	1	0	3	0	0	NA	NA	FALSE	0	0	NA	NA	FALSE
chr1	36475992	36476110	CSF3R	-2201	0	1	0	3	0	0	NA	NA	FALSE	0	0	NA	NA	FALSE
chr1	36485810	36485928	CSF3R	-2555	0	1	0	4	0	0	NA	NA	FALSE	0	0	NA	NA	FALSE
chr1	36516473	36516591	CSF3R	-33218	0	1	0	3	0	0	NA	NA	FALSE	0	0	NA	NA	FALSE
chr1	37448168	37448286	LINC01137	26216	0	1	0	4	0	0	NA	NA	FALSE	0	0	NA	NA	FALSE
chr1	37454961	37455079	LINC01137	19423	0	1	0	3	0	0	NA	NA	FALSE	0	0	NA	NA	FALSE
chr1	37458684	37458802	LINC01137	15700	0	1	0	3	0	0	NA	NA	FALSE	0	0	NA	NA	FALSE
chr1	37474217	37474335	LINC01137	167	0	1	0	11	0	0	NA	NA	FALSE	0	0	NA	NA	FALSE
chr1	37474664	37474782	ZC3H12A	198	0	1	0	11	0	0	NA	NA	FALSE	0	0	NA	NA	FALSE
chr1	37475713	37475831	ZC3H12A	1247	0	1	0	5	0	0	NA	NA	FALSE	0	0	NA	NA	FALSE
chr1	37477254	37477372	ZC3H12A	2788	0	1	0	3	0	0	NA	NA	FALSE	0	0	NA	NA	FALSE
chr1	37478479	37478597	MIR6732	-1691	0	1	0	4	0	0	NA	NA	FALSE	0	0	NA	NA	FALSE
chr1	37479377	37479495	MIR6732	-793	0	1	0	4	0	0	NA	NA	FALSE	0	0	NA	NA	FALSE
chr1	37480268	37480386	MIR6732	98	0	1	0	3	0	0	NA	NA	FALSE	0	0	NA	NA	FALSE
chr1	37514006	37514124	MEAF6	754	0	1	0	6	0	0	NA	NA	FALSE	0	0	NA	NA	FALSE
chr1	37514462	37514862	MEAF6	0	0	0	1	4	1	0.25	-1.635	5.51417e-08	TRUE	0	0	NA	NA	FALSE
chr1	37752932	37753332	EPHA10	0	0	0	1	5	0	0	NA	NA	FALSE	0	0	NA	NA	FALSE
chr1	37765183	37765301	EPHA10	-90	0	1	0	7	0	0	NA	NA	FALSE	0	0	NA	NA	FALSE
chr1	37793800	37793918	MANEAL	44	0	1	0	10	0	0	NA	NA	FALSE	0	0	NA	NA	FALSE
chr1	37794134	37794252	MANEAL	92	0	1	0	10	0	0	NA	NA	FALSE	0	0	NA	NA	FALSE
chr1	37794942	37795060	MANEAL	-486	0	1	0	5	0	0	NA	NA	FALSE	0	0	NA	NA	FALSE
chr1	37807738	37807856	C1orf122	-3	0	1	0	6	0	0	NA	NA	FALSE	0	0	NA	NA	FALSE
chr1	37808665	37808783	YRDC	-531	0	1	0	5	0	0	NA	NA	FALSE	0	0	NA	NA	FALSE
chr1	37817790	37817908	YRDC	-9656	0	1	0	3	0	0	NA	NA	FALSE	0	0	NA	NA	FALSE
chr1	37859296	37859696	MTF1	0	0	0	1	4	0	0	NA	NA	FALSE	0	0	NA	NA	FALSE
chr1	38587181	38587299	LOC105378658	68991	0	1	0	4	0	0	NA	NA	FALSE	0	0	NA	NA	FALSE
chr1	38608392	38608510	LOC105378658	90202	0	1	0	4	0	0	NA	NA	FALSE	0	0	NA	NA	FALSE
chr1	38623724	38623842	LOC105378660	104858	0	1	0	3	0	0	NA	NA	FALSE	0	0	NA	NA	FALSE
chr1	38626089	38626207	LOC105378660	102493	0	1	0	4	0	0	NA	NA	FALSE	0	0	NA	NA	FALSE
chr1	38804183	38804394	RRAGC	55535	1	0	0	4	0	0	NA	NA	FALSE	0	0	NA	NA	FALSE
chr1	38835368	38835486	RRAGC	24396	0	1	0	3	0	0	NA	NA	FALSE	0	0	NA	NA	FALSE
chr1	38859080	38859198	RRAGC	684	0	1	0	4	0	0	NA	NA	FALSE	0	0	NA	NA	FALSE
chr1	38859420	38859820	RRAGC	0	0	0	1	4	0	0	NA	NA	FALSE	0	0	NA	NA	FALSE
chr1	38859969	38860087	RRAGC	-205	0	1	0	6	0	0	NA	NA	FALSE	0	0	NA	NA	FALSE
chr1	38873055	38873455	MYCBP	0	0	0	1	2	0	0	NA	NA	FALSE	0	0	NA	NA	FALSE
chr1	38873324	38873442	MYCBP	-5	0	1	0	7	0	0	NA	NA	FALSE	0	0	NA	NA	FALSE
chr1	39081787	39081905	MACF1	-2320	0	1	0	5	0	0	NA	NA	FALSE	0	0	NA	NA	FALSE
chr1	39088815	39088933	MACF1	4683	0	1	0	4	0	0	NA	NA	FALSE	0	0	NA	NA	FALSE
chr1	39102519	39104115	MACF1	-2061	0	1	0	10	0	0	NA	NA	FALSE	0	0	NA	NA	FALSE
chr1	39105299	39105699	MACF1	0	0	0	1	4	1	0.25	-2.284	4.17479e-09	TRUE	0	0	NA	NA	FALSE
chr1	39106866	39107675	MACF1	1892	0	1	0	8	0	0	NA	NA	FALSE	0	0	NA	NA	FALSE
chr1	39107889	39108287	MACF1	2710	1	0	0	5	0	0	NA	NA	FALSE	0	0	NA	NA	FALSE
chr1	39525710	39525828	OXCT2P1	10904	0	1	0	4	0	0	NA	NA	FALSE	0	0	NA	NA	FALSE
chr1	39576489	39576889	PABPC4	0	0	0	1	2	0	0	NA	NA	FALSE	0	0	NA	NA	FALSE
chr1	39576902	39577020	PABPC4	-112	0	1	0	4	0	0	NA	NA	FALSE	0	0	NA	NA	FALSE
chr1	39789198	39789316	LOC101929536	282	0	1	0	6	0	0	NA	NA	FALSE	0	0	NA	NA	FALSE
chr1	39799782	39799900	LOC105378951	401	0	1	0	5	0	0	NA	NA	FALSE	0	0	NA	NA	FALSE
chr1	40032414	40032532	LOC105378669	7504	0	1	0	3	1	0.333	-0.881	0.100335	TRUE	0	0	NA	NA	FALSE
chr1	40040651	40041051	CAP1	0	0	0	1	2	0	0	NA	NA	FALSE	0	0	NA	NA	FALSE
chr1	40040797	40040915	CAP1	27	0	1	0	7	1	0.143	-1.185	0.00041008	TRUE	0	0	NA	NA	FALSE
chr1	40665391	40665791	RIMS3	0	0	0	1	4	0	0	NA	NA	FALSE	0	0	NA	NA	FALSE
chr1	40691617	40692017	NFYC	0	0	0	1	4	2	0.5	-1.887	2.32619e-12	TRUE	0	0	NA	NA	FALSE
chr1	40692007	40692261	RIMS3	-30	1	0	0	7	2	0.286	-1.634	9.70794e-11	TRUE	0	0	NA	NA	FALSE
chr1	40780930	40781105	KCNQ4	-2994	1	0	0	5	0	0	NA	NA	FALSE	0	0	NA	NA	FALSE
chr1	40824584	40824741	KCNQ4	5703	1	0	0	5	0	0	NA	NA	FALSE	0	0	NA	NA	FALSE
chr1	40979298	40981113	CTPS1	510	1	0	0	19	0	0	NA	NA	FALSE	0	0	NA	NA	FALSE
chr1	40998018	40998136	CTPS1	9630	0	1	0	4	0	0	NA	NA	FALSE	0	0	NA	NA	FALSE
chr1	41003876	41003994	SLFNL1-AS1	-10654	0	1	0	4	0	0	NA	NA	FALSE	0	0	NA	NA	FALSE
chr1	41019463	41019581	SLFNL1	2195	0	1	0	3	0	0	NA	NA	FALSE	0	0	NA	NA	FALSE
chr1	41022079	41022197	SLFNL1	102	0	1	0	3	0	0	NA	NA	FALSE	0	0	NA	NA	FALSE
chr1	41025147	41025265	SLFNL1	-1762	0	1	0	3	0	0	NA	NA	FALSE	0	0	NA	NA	FALSE
chr1	41240824	41242143	SCMH1	660	1	0	0	12	0	0	NA	NA	FALSE	0	0	NA	NA	FALSE
chr1	41241919	41242319	SCMH1	0	0	0	1	2	1	0.5	-0.296	0.681784	TRUE	0	0	NA	NA	FALSE
chr1	41431872	41432224	LOC105378678	485	1	0	0	10	0	0	NA	NA	FALSE	0	0	NA	NA	FALSE
chr1	41432358	41433474	LOC105378678	1353	1	0	0	13	0	0	NA	NA	FALSE	0	0	NA	NA	FALSE
chr1	41444382	41444500	LOC105378678	12878	0	1	0	4	0	0	NA	NA	FALSE	0	0	NA	NA	FALSE
chr1	41468133	41468251	EDN2	16491	0	1	0	3	0	0	NA	NA	FALSE	0	0	NA	NA	FALSE
chr1	41469187	41469305	EDN2	15437	0	1	0	4	0	0	NA	NA	FALSE	0	0	NA	NA	FALSE
chr1	41473812	41473930	EDN2	10812	0	1	0	4	0	0	NA	NA	FALSE	0	0	NA	NA	FALSE
chr1	41483875	41483993	EDN2	749	0	1	0	4	0	0	NA	NA	FALSE	0	0	NA	NA	FALSE
chr1	41484383	41484783	EDN2	0	0	0	1	1	0	0	NA	NA	FALSE	0	0	NA	NA	FALSE
chr1	41484387	41484505	EDN2	237	0	1	0	4	0	0	NA	NA	FALSE	0	0	NA	NA	FALSE
chr1	41492402	41492520	EDN2	-7762	0	1	0	3	0	0	NA	NA	FALSE	0	0	NA	NA	FALSE
chr1	41496250	41496368	EDN2	-11610	0	1	0	5	0	0	NA	NA	FALSE	0	0	NA	NA	FALSE
chr1	41499009	41499127	EDN2	-14369	0	1	0	4	0	0	NA	NA	FALSE	0	0	NA	NA	FALSE
chr1	41501263	41501381	EDN2	-16623	0	1	0	5	0	0	NA	NA	FALSE	0	0	NA	NA	FALSE
chr1	41503910	41504028	EDN2	-19270	0	1	0	5	0	0	NA	NA	FALSE	0	0	NA	NA	FALSE
chr1	41507177	41507295	EDN2	-22537	0	1	0	4	0	0	NA	NA	FALSE	0	0	NA	NA	FALSE
chr1	41513514	41513632	EDN2	-28874	0	1	0	4	0	0	NA	NA	FALSE	0	0	NA	NA	FALSE
chr1	41516211	41516329	EDN2	-31571	0	1	0	3	0	0	NA	NA	FALSE	0	0	NA	NA	FALSE
chr1	41830525	41830651	HIVEP3	88119	1	0	0	3	0	0	NA	NA	FALSE	0	0	NA	NA	FALSE
chr1	41849346	41849548	HIVEP3	69260	1	0	0	3	0	0	NA	NA	FALSE	0	0	NA	NA	FALSE
chr1	41890605	41892228	HIVEP3	27291	1	0	0	12	0	0	NA	NA	FALSE	0	0	NA	NA	FALSE
chr1	41918596	41918996	HIVEP3	0	0	0	1	3	0	0	NA	NA	FALSE	0	0	NA	NA	FALSE
chr1	42144778	42144896	GUCA2B	-8583	0	1	0	4	0	0	NA	NA	FALSE	0	0	NA	NA	FALSE
chr1	42146981	42147099	GUCA2B	-6380	0	1	0	4	0	0	NA	NA	FALSE	0	0	NA	NA	FALSE
chr1	42173449	42173567	GUCA2A	-8784	0	1	0	5	0	0	NA	NA	FALSE	0	0	NA	NA	FALSE
chr1	42380701	42381101	RIMKLA	0	0	0	1	2	0	0	NA	NA	FALSE	0	0	NA	NA	FALSE
chr1	42380796	42381316	RIMKLA	254	1	0	0	6	0	0	NA	NA	FALSE	0	0	NA	NA	FALSE
chr1	42731192	42731310	CLDN19	9003	0	1	0	3	0	0	NA	NA	FALSE	0	0	NA	NA	FALSE
chr1	42736384	42736502	CLDN19	3811	0	1	0	4	0	0	NA	NA	FALSE	0	0	NA	NA	FALSE
chr1	42747271	42747389	CLDN19	-7076	0	1	0	3	0	0	NA	NA	FALSE	0	0	NA	NA	FALSE
chr1	42757100	42757218	P3H1	5228	0	1	0	3	0	0	NA	NA	FALSE	0	0	NA	NA	FALSE
chr1	42759268	42759386	P3H1	3060	0	1	0	5	0	0	NA	NA	FALSE	0	0	NA	NA	FALSE
chr1	42767317	42767435	C1orf50	132	0	1	0	6	0	0	NA	NA	FALSE	0	0	NA	NA	FALSE
chr1	42929438	42929971	SLC2A1-AS1	-29344	1	0	0	4	0	0	NA	NA	FALSE	0	0	NA	NA	FALSE
chr1	42930893	42932688	SLC2A1-AS1	-27258	1	0	0	10	0	0	NA	NA	FALSE	0	0	NA	NA	FALSE
chr1	42958567	42958967	SLC2A1	0	0	0	1	5	1	0.2	-0.551	0.163982	TRUE	0	0	NA	NA	FALSE
chr1	43225241	43225359	LOC105378685	-1265	0	1	0	4	0	0	NA	NA	FALSE	0	0	NA	NA	FALSE
chr1	43227384	43227502	LOC105378685	-3408	0	1	0	3	0	0	NA	NA	FALSE	0	0	NA	NA	FALSE
chr1	43238219	43238337	LOC105378685	9599	0	1	0	3	0	0	NA	NA	FALSE	0	0	NA	NA	FALSE
chr1	43452708	43453989	HYI	641	1	0	0	11	0	0	NA	NA	FALSE	0	0	NA	NA	FALSE
chr1	43453656	43454056	HYI	0	0	0	1	2	0	0	NA	NA	FALSE	0	0	NA	NA	FALSE
chr1	43650060	43650460	KDM4A	0	0	0	1	4	0	0	NA	NA	FALSE	0	0	NA	NA	FALSE
chr1	43704837	43704955	KDM4A-AS1	2445	0	1	0	3	0	0	NA	NA	FALSE	0	0	NA	NA	FALSE
chr1	43707431	43707831	ST3GAL3	0	0	0	1	4	1	0.25	-0.954	0.00342052	TRUE	0	0	NA	NA	FALSE
chr1	43872107	43872387	ST3GAL3	-7298	1	0	0	3	0	0	NA	NA	FALSE	0	0	NA	NA	FALSE
chr1	43946805	43948270	LOC101929609	-684	1	0	0	14	3	0.214	-3.058	9.46097e-14	TRUE	0	0	NA	NA	FALSE
chr1	43946848	43947248	IPO13	0	0	0	1	1	0	0	NA	NA	FALSE	0	0	NA	NA	FALSE
chr1	43969994	43970379	DPH2	174	1	0	0	5	0	0	NA	NA	FALSE	0	0	NA	NA	FALSE
chr1	43974242	43974360	ATP6V0B	-346	0	1	0	7	0	0	NA	NA	FALSE	0	0	NA	NA	FALSE
chr1	43974647	43976000	ATP6V0B	676	0	1	0	20	3	0.15	-1.443	2.10315e-05	TRUE	0	0	NA	NA	FALSE
chr1	43974838	43975238	ATP6V0B	0	0	0	1	1	0	0	NA	NA	FALSE	0	0	NA	NA	FALSE
chr1	43976242	43976360	ATP6V0B	1654	0	1	0	6	0	0	NA	NA	FALSE	0	0	NA	NA	FALSE
chr1	43979125	43979525	B4GALT2	0	0	0	1	4	0	0	NA	NA	FALSE	0	0	NA	NA	FALSE
chr1	43986767	43986992	CCDC24	-4367	0	1	0	4	0	0	NA	NA	FALSE	0	0	NA	NA	FALSE
chr1	43990892	43991010	CCDC24	-295	0	1	0	8	0	0	NA	NA	FALSE	0	0	NA	NA	FALSE
chr1	43991487	43991605	CCDC24	-61	0	1	0	9	0	0	NA	NA	FALSE	0	0	NA	NA	FALSE
chr1	43991620	43991738	CCDC24	43	0	1	0	8	0	0	NA	NA	FALSE	0	0	NA	NA	FALSE
chr1	43991704	43992104	CCDC24	0	0	0	1	2	0	0	NA	NA	FALSE	0	0	NA	NA	FALSE
chr1	43994915	43995033	CCDC24	3058	0	1	0	4	0	0	NA	NA	FALSE	0	0	NA	NA	FALSE
chr1	44002597	44002715	CCDC24	10740	0	1	0	3	0	0	NA	NA	FALSE	0	0	NA	NA	FALSE
chr1	44011004	44011122	SLC6A9	6096	0	1	0	3	0	0	NA	NA	FALSE	0	0	NA	NA	FALSE
chr1	44015827	44015945	SLC6A9	1273	0	1	0	3	1	0.333	-0.063	0.972155	TRUE	0	0	NA	NA	FALSE
chr1	44031175	44031575	SLC6A9	0	0	0	1	3	0	0	NA	NA	FALSE	0	0	NA	NA	FALSE
chr1	44036694	44036812	SLC6A9	-5261	0	1	0	3	0	0	NA	NA	FALSE	0	0	NA	NA	FALSE
chr1	44631202	44633189	RNF220	239	1	0	0	18	0	0	NA	NA	FALSE	0	0	NA	NA	FALSE
chr1	44729389	44729507	RNU5D-1	1720	0	1	0	3	0	0	NA	NA	FALSE	0	0	NA	NA	FALSE
chr1	44739754	44740154	KIF2C	0	0	0	1	4	0	0	NA	NA	FALSE	0	0	NA	NA	FALSE
chr1	44748034	44748152	KIF2C	1669	0	1	0	3	0	0	NA	NA	FALSE	0	0	NA	NA	FALSE
chr1	44819118	44820898	LOC107984952	1942	1	0	0	10	1	0.1	-0.277	0.766017	TRUE	0	0	NA	NA	FALSE
chr1	45550732	45551132	AKR1A1	0	0	0	1	4	0	0	NA	NA	FALSE	0	0	NA	NA	FALSE
chr1	45569658	45569868	NASP	-14224	1	0	0	7	0	0	NA	NA	FALSE	0	0	NA	NA	FALSE
chr1	45570184	45570302	NASP	-13744	0	1	0	6	0	0	NA	NA	FALSE	0	0	NA	NA	FALSE
chr1	45583942	45584342	NASP	0	0	0	1	4	0	0	NA	NA	FALSE	0	0	NA	NA	FALSE
chr1	45584459	45584577	NASP	478	0	1	0	5	0	0	NA	NA	FALSE	0	0	NA	NA	FALSE
chr1	45750026	45750813	IPP	394	1	0	0	9	0	0	NA	NA	FALSE	0	0	NA	NA	FALSE
chr1	46132348	46132748	PIK3R3	0	0	0	1	5	1	0.2	-1.455	4.79009e-06	TRUE	0	0	NA	NA	FALSE
chr1	46171178	46172326	LOC105378695	3248	1	0	0	10	0	0	NA	NA	FALSE	0	0	NA	NA	FALSE
chr1	46172367	46172694	LOC105378695	2470	1	0	0	4	0	0	NA	NA	FALSE	0	0	NA	NA	FALSE
chr1	46173186	46174076	LOC105378695	1369	1	0	0	6	0	0	NA	NA	FALSE	0	0	NA	NA	FALSE
chr1	46223673	46223876	POMGNT1	-3469	1	0	0	4	0	0	NA	NA	FALSE	0	0	NA	NA	FALSE
chr1	46300735	46300964	LRRC41	2182	1	0	0	2	0	0	NA	NA	FALSE	0	0	NA	NA	FALSE
chr1	46301169	46302612	LRRC41	1141	1	0	0	15	1	0.067	-1.698	4.66197e-07	TRUE	1	0.067	0.764	0.000437428	TRUE
chr1	46302887	46303287	LRRC41	0	0	0	1	5	0	0	NA	NA	FALSE	0	0	NA	NA	FALSE
chr1	46303585	46303985	UQCRH	0	0	0	1	6	0	0	NA	NA	FALSE	0	0	NA	NA	FALSE
chr1	46308547	46308902	UQCRH	5112	1	0	0	3	0	0	NA	NA	FALSE	0	0	NA	NA	FALSE
chr1	46333624	46333742	NSUN4	-6493	0	1	0	4	1	0.25	0.129	0.907019	TRUE	0	0	NA	NA	FALSE
chr1	46339533	46339651	NSUN4	-584	0	1	0	4	0	0	NA	NA	FALSE	0	0	NA	NA	FALSE
chr1	46340874	46340992	NSUN4	-244	0	1	0	4	0	0	NA	NA	FALSE	0	0	NA	NA	FALSE
chr1	46342179	46342297	NSUN4	1061	0	1	0	5	0	0	NA	NA	FALSE	0	0	NA	NA	FALSE
chr1	46346910	46347028	NSUN4	5792	0	1	0	5	0	0	NA	NA	FALSE	0	0	NA	NA	FALSE
chr1	46348216	46348334	NSUN4	7098	0	1	0	3	0	0	NA	NA	FALSE	0	0	NA	NA	FALSE
chr1	46394216	46394616	FAAH	0	0	0	1	4	0	0	NA	NA	FALSE	0	0	NA	NA	FALSE
chr1	46412113	46412231	FAAH	17906	0	1	0	5	0	0	NA	NA	FALSE	0	0	NA	NA	FALSE
chr1	46413730	46413848	FAAH	19523	0	1	0	4	0	0	NA	NA	FALSE	0	0	NA	NA	FALSE
chr1	46431650	46431768	FAAHP1	-2117	0	1	0	4	0	0	NA	NA	FALSE	0	0	NA	NA	FALSE
chr1	46437726	46437844	FAAHP1	3959	0	1	0	3	0	0	NA	NA	FALSE	0	0	NA	NA	FALSE
chr1	46719227	46719345	EFCAB14	-222	0	1	0	4	0	0	NA	NA	FALSE	0	0	NA	NA	FALSE
chr1	46725369	46725487	EFCAB14	-6364	0	1	0	4	0	0	NA	NA	FALSE	0	0	NA	NA	FALSE
chr1	46757860	46757978	LOC105378699	-7136	0	1	0	5	0	0	NA	NA	FALSE	0	0	NA	NA	FALSE
chr1	47333612	47333730	CMPK1	-125	0	1	0	5	0	0	NA	NA	FALSE	0	0	NA	NA	FALSE
chr1	47333811	47334211	CMPK1	0	0	0	1	4	0	0	NA	NA	FALSE	0	0	NA	NA	FALSE
chr1	47388890	47389227	FOXE3	-27013	0	1	0	3	0	0	NA	NA	FALSE	0	0	NA	NA	FALSE
chr1	47438317	47438585	LINC01389	-1134	1	0	0	8	0	0	NA	NA	FALSE	0	0	NA	NA	FALSE
chr1	47438610	47438894	LINC01389	-1435	1	0	0	11	0	0	NA	NA	FALSE	0	0	NA	NA	FALSE
chr1	47439070	47439440	LINC01389	-1938	1	0	0	9	0	0	NA	NA	FALSE	0	0	NA	NA	FALSE
chr1	47507760	47509476	LINC01389	-71301	1	0	0	14	0	0	NA	NA	FALSE	0	0	NA	NA	FALSE
chr1	47650417	47650839	LOC107984953	-37869	1	0	0	4	0	0	NA	NA	FALSE	0	0	NA	NA	FALSE
chr1	47651323	47651693	LOC107984953	-36989	1	0	0	4	0	0	NA	NA	FALSE	0	0	NA	NA	FALSE
chr1	47704381	47704499	LOC107984953	15943	0	1	0	3	0	0	NA	NA	FALSE	0	0	NA	NA	FALSE
chr1	47710613	47710731	LOC107984953	22175	0	1	0	5	0	0	NA	NA	FALSE	0	0	NA	NA	FALSE
chr1	47725108	47725226	LOC107984953	36670	0	1	0	4	0	0	NA	NA	FALSE	0	0	NA	NA	FALSE
chr1	47755552	47755670	TRABD2B	64118	0	1	0	3	0	0	NA	NA	FALSE	0	0	NA	NA	FALSE
chr1	47756112	47756230	TRABD2B	63558	0	1	0	5	0	0	NA	NA	FALSE	0	0	NA	NA	FALSE
chr1	47759931	47760049	TRABD2B	59739	0	1	0	6	0	0	NA	NA	FALSE	0	0	NA	NA	FALSE
chr1	47765186	47765454	TRABD2B	54409	1	0	0	4	0	0	NA	NA	FALSE	0	0	NA	NA	FALSE
chr1	47931587	47931705	TRABD2B	65244	0	1	0	3	0	0	NA	NA	FALSE	0	0	NA	NA	FALSE
chr1	47934432	47934550	TRABD2B	62399	0	1	0	4	0	0	NA	NA	FALSE	0	0	NA	NA	FALSE
chr1	47951970	47952088	TRABD2B	44861	0	1	0	4	0	0	NA	NA	FALSE	0	0	NA	NA	FALSE
chr1	48061311	48061429	LOC105379778	11324	0	1	0	3	0	0	NA	NA	FALSE	0	0	NA	NA	FALSE
chr1	48062416	48062636	LOC105379778	12480	1	0	0	4	0	0	NA	NA	FALSE	0	0	NA	NA	FALSE
chr1	48070813	48070931	LOC105379778	20826	0	1	0	3	0	0	NA	NA	FALSE	0	0	NA	NA	FALSE
chr1	48093807	48093925	LOC105379778	43820	0	1	0	5	0	0	NA	NA	FALSE	0	0	NA	NA	FALSE
chr1	48105310	48105428	LOC105379778	55323	0	1	0	3	0	0	NA	NA	FALSE	0	0	NA	NA	FALSE
chr1	48109533	48109651	LOC105379778	59546	0	1	0	4	0	0	NA	NA	FALSE	0	0	NA	NA	FALSE
chr1	48202293	48202411	SLC5A9	-18760	0	1	0	4	0	0	NA	NA	FALSE	0	0	NA	NA	FALSE
chr1	48217058	48217176	SLC5A9	-3995	0	1	0	6	0	0	NA	NA	FALSE	0	0	NA	NA	FALSE
chr1	48228481	48228599	SLC5A9	-320	0	1	0	3	0	0	NA	NA	FALSE	0	0	NA	NA	FALSE
chr1	48236986	48237104	SLC5A9	8185	0	1	0	3	0	0	NA	NA	FALSE	1	0.333	1.2	7.20703e-06	TRUE
chr1	48530864	48530982	SPATA6	-58715	0	1	0	4	0	0	NA	NA	FALSE	0	0	NA	NA	FALSE
chr1	50329698	50329816	LOC105378712	-8595	0	1	0	3	0	0	NA	NA	FALSE	0	0	NA	NA	FALSE
chr1	50333685	50333803	LOC105378712	-12582	0	1	0	4	0	0	NA	NA	FALSE	0	0	NA	NA	FALSE
chr1	50348829	50348947	LOC105378712	-27726	0	1	0	5	0	0	NA	NA	FALSE	0	0	NA	NA	FALSE
chr1	50368573	50368691	LOC105378712	-47470	0	1	0	5	0	0	NA	NA	FALSE	0	0	NA	NA	FALSE
chr1	50369968	50370086	LOC105378712	-48865	0	1	0	4	0	0	NA	NA	FALSE	0	0	NA	NA	FALSE
chr1	50959103	50959285	FAF1	599	1	0	0	4	0	0	NA	NA	FALSE	0	0	NA	NA	FALSE
chr1	50959862	50960262	FAF1	0	0	0	1	4	0	0	NA	NA	FALSE	0	0	NA	NA	FALSE
chr1	51236190	51236590	RNF11	0	0	0	1	3	0	0	NA	NA	FALSE	0	0	NA	NA	FALSE
chr1	51236272	51237417	RNF11	572	1	0	0	11	0	0	NA	NA	FALSE	0	0	NA	NA	FALSE
chr1	51287882	51288000	TTC39A	10020	0	1	0	4	0	0	NA	NA	FALSE	0	0	NA	NA	FALSE
chr1	51296927	51297045	TTC39A	975	0	1	0	4	0	0	NA	NA	FALSE	0	0	NA	NA	FALSE
chr1	51299367	51299485	TTC39A	-1465	0	1	0	3	0	0	NA	NA	FALSE	0	0	NA	NA	FALSE
chr1	51307026	51307304	TTC39A	-9204	1	0	0	3	0	0	NA	NA	FALSE	0	0	NA	NA	FALSE
chr1	51311037	51311155	TTC39A	11167	0	1	0	4	0	0	NA	NA	FALSE	0	0	NA	NA	FALSE
chr1	51313529	51313647	TTC39A	8675	0	1	0	5	0	0	NA	NA	FALSE	0	0	NA	NA	FALSE
chr1	51314559	51314677	TTC39A	7645	0	1	0	4	0	0	NA	NA	FALSE	0	0	NA	NA	FALSE
chr1	51316133	51316251	TTC39A	6071	0	1	0	5	0	0	NA	NA	FALSE	0	0	NA	NA	FALSE
chr1	51330271	51330671	TTC39A	0	0	0	1	4	0	0	NA	NA	FALSE	0	0	NA	NA	FALSE
chr1	51616988	51617388	OSBPL9	0	0	0	1	4	0	0	NA	NA	FALSE	0	0	NA	NA	FALSE
chr1	51785383	51785501	LOC105378721	-8511	0	1	0	5	0	0	NA	NA	FALSE	0	0	NA	NA	FALSE
chr1	51792942	51793060	LOC105378721	-952	0	1	0	3	0	0	NA	NA	FALSE	0	0	NA	NA	FALSE
chr1	51970208	51970318	RAB3B	7311	1	0	0	4	0	0	NA	NA	FALSE	0	0	NA	NA	FALSE
chr1	52142001	52142401	ZFYVE9	0	0	0	1	1	0	0	NA	NA	FALSE	0	0	NA	NA	FALSE
chr1	52142093	52143120	ZFYVE9	513	1	0	0	9	0	0	NA	NA	FALSE	0	0	NA	NA	FALSE
chr1	52348781	52348899	CC2D1B	12630	0	1	0	4	0	0	NA	NA	FALSE	0	0	NA	NA	FALSE
chr1	52364372	52364490	CC2D1B	1755	0	1	0	5	0	0	NA	NA	FALSE	0	0	NA	NA	FALSE
chr1	52364994	52366320	CC2D1B	529	0	1	0	14	0	0	NA	NA	FALSE	0	0	NA	NA	FALSE
chr1	52368438	52368556	CC2D1B	-2206	0	1	0	3	0	0	NA	NA	FALSE	0	0	NA	NA	FALSE
chr1	52368659	52368777	CC2D1B	-2427	0	1	0	3	0	0	NA	NA	FALSE	0	0	NA	NA	FALSE
chr1	52842510	52843760	ZYG11A	400	1	0	0	15	0	0	NA	NA	FALSE	0	0	NA	NA	FALSE
chr1	52842661	52843061	ZYG11A	0	0	0	1	1	0	0	NA	NA	FALSE	0	0	NA	NA	FALSE
chr1	52843912	52844396	ZYG11A	1419	1	0	0	7	0	0	NA	NA	FALSE	0	0	NA	NA	FALSE
chr1	52920747	52921774	ECHDC2	154	1	0	0	10	0	0	NA	NA	FALSE	0	0	NA	NA	FALSE
chr1	52921447	52921847	ECHDC2	0	0	0	1	1	0	0	NA	NA	FALSE	0	0	NA	NA	FALSE
chr1	53086662	53086997	SLC1A7	6610	1	0	0	5	0	0	NA	NA	FALSE	0	0	NA	NA	FALSE
chr1	53196428	53197700	CPT2	304	1	0	0	11	0	0	NA	NA	FALSE	0	0	NA	NA	FALSE
chr1	53196723	53197123	CPT2	0	0	0	1	1	0	0	NA	NA	FALSE	0	0	NA	NA	FALSE
chr1	53197826	53198504	CPT2	1405	1	0	0	8	0	0	NA	NA	FALSE	0	0	NA	NA	FALSE
chr1	53220323	53220723	C1orf123	0	0	0	1	3	0	0	NA	NA	FALSE	0	0	NA	NA	FALSE
chr1	53220705	53220823	C1orf123	-125	0	1	0	4	0	0	NA	NA	FALSE	0	0	NA	NA	FALSE
chr1	53238283	53238401	LOC100507564	-267	0	1	0	6	2	0.333	-1.883	1.32929e-09	TRUE	0	0	NA	NA	FALSE
chr1	53255191	53255309	LOC105378728	59	0	1	0	3	0	0	NA	NA	FALSE	0	0	NA	NA	FALSE
chr1	53266174	53266292	LOC105378728	11042	0	1	0	3	0	0	NA	NA	FALSE	0	0	NA	NA	FALSE
chr1	53278356	53278474	LOC105378726	-11154	0	1	0	3	0	0	NA	NA	FALSE	0	0	NA	NA	FALSE
chr1	53327785	53328185	LRP8	0	0	0	1	4	0	0	NA	NA	FALSE	0	0	NA	NA	FALSE
chr1	53552107	53552388	DMRTB1	92849	1	0	0	4	0	0	NA	NA	FALSE	0	0	NA	NA	FALSE
chr1	53725512	53725630	GLIS1	8633	0	1	0	3	0	0	NA	NA	FALSE	0	0	NA	NA	FALSE
chr1	53754830	53754948	GLIS1	-15718	0	1	0	3	0	0	NA	NA	FALSE	0	0	NA	NA	FALSE
chr1	53826506	53826624	NDC1	11531	0	1	0	5	0	0	NA	NA	FALSE	0	0	NA	NA	FALSE
chr1	53837095	53838559	NDC1	269	0	1	0	9	0	0	NA	NA	FALSE	0	0	NA	NA	FALSE
chr1	53861010	53861128	YIPF1	21961	0	1	0	6	0	0	NA	NA	FALSE	0	0	NA	NA	FALSE
chr1	53889489	53889889	YIPF1	0	0	0	1	5	0	0	NA	NA	FALSE	0	0	NA	NA	FALSE
chr1	54052920	54053320	TMEM59	0	0	0	1	1	0	0	NA	NA	FALSE	0	0	NA	NA	FALSE
chr1	54053192	54053310	TMEM59	185	0	1	0	5	0	0	NA	NA	FALSE	0	0	NA	NA	FALSE
chr1	54070235	54070353	MIR4781	16216	0	1	0	3	0	0	NA	NA	FALSE	0	0	NA	NA	FALSE
chr1	54135712	54135960	CDCP2	17170	1	0	0	3	0	0	NA	NA	FALSE	0	0	NA	NA	FALSE
chr1	54311164	54311384	SSBP3	25081	1	0	0	5	0	0	NA	NA	FALSE	0	0	NA	NA	FALSE
chr1	54329588	54329843	SSBP3	6640	1	0	0	4	0	0	NA	NA	FALSE	0	0	NA	NA	FALSE
chr1	54406117	54406517	SSBP3	0	0	0	1	3	0	0	NA	NA	FALSE	0	0	NA	NA	FALSE
chr1	54542172	54542572	ACOT11	0	0	0	1	5	0	0	NA	NA	FALSE	0	0	NA	NA	FALSE
chr1	54548715	54548964	ACOT11	706	1	0	0	3	0	0	NA	NA	FALSE	0	0	NA	NA	FALSE
chr1	54590282	54590486	FAM151A	33143	1	0	0	4	2	0.5	-1.191	7.33781e-08	TRUE	0	0	NA	NA	FALSE
chr1	54686034	54686342	TTC4	-29633	1	0	0	3	0	0	NA	NA	FALSE	0	0	NA	NA	FALSE
chr1	54950205	54951230	LOC105378736	29743	1	0	0	8	0	0	NA	NA	FALSE	0	0	NA	NA	FALSE
chr1	54979561	54979663	LOC105378736	848	1	0	0	4	0	0	NA	NA	FALSE	0	0	NA	NA	FALSE
chr1	54980663	54981207	TMEM61	272	1	0	0	5	0	0	NA	NA	FALSE	0	0	NA	NA	FALSE
chr1	55022195	55022313	PCSK9	-17221	0	1	0	4	0	0	NA	NA	FALSE	0	0	NA	NA	FALSE
chr1	55049648	55049766	PCSK9	9486	0	1	0	4	0	0	NA	NA	FALSE	0	0	NA	NA	FALSE
chr1	55071620	55071738	PCSK9	31458	0	1	0	5	0	0	NA	NA	FALSE	0	0	NA	NA	FALSE
chr1	55215028	55215428	USP24	0	0	0	1	5	0	0	NA	NA	FALSE	0	0	NA	NA	FALSE
chr1	56477292	56478076	LOC105378744	63114	1	0	0	6	0	0	NA	NA	FALSE	0	0	NA	NA	FALSE
chr1	56821162	56821280	C1orf168	-1525	0	1	0	4	0	0	NA	NA	FALSE	0	0	NA	NA	FALSE
chr1	56832009	56832127	C1orf168	-83	0	1	0	3	0	0	NA	NA	FALSE	0	0	NA	NA	FALSE
chr1	56833199	56833317	C1orf168	-1273	0	1	0	3	0	0	NA	NA	FALSE	0	0	NA	NA	FALSE
chr1	56834585	56834703	C1orf168	-2659	0	1	0	3	0	0	NA	NA	FALSE	0	0	NA	NA	FALSE
chr1	58249927	58250167	DAB1	492	1	0	0	5	0	0	NA	NA	FALSE	0	0	NA	NA	FALSE
chr1	58545554	58546799	OMA1	623	1	0	0	13	0	0	NA	NA	FALSE	0	0	NA	NA	FALSE
chr1	58546831	58546949	OMA1	-91	0	1	0	8	0	0	NA	NA	FALSE	0	0	NA	NA	FALSE
chr1	58903134	58904492	LOC105378753	1684	1	0	0	13	0	0	NA	NA	FALSE	1	0.077	0.963	1.92693e-05	TRUE
chr1	59079490	59079688	LOC105378753	-49660	1	0	0	3	0	0	NA	NA	FALSE	0	0	NA	NA	FALSE
chr1	59878496	59878614	CYP2J2	48243	0	1	0	4	0	0	NA	NA	FALSE	0	0	NA	NA	FALSE
chr1	59971501	59971619	CYP2J2	-44762	0	1	0	4	0	0	NA	NA	FALSE	0	0	NA	NA	FALSE
chr1	60848716	60848834	LOC101926964	-23191	0	1	0	4	0	0	NA	NA	FALSE	0	0	NA	NA	FALSE
chr1	61043064	61043182	NFIA	-34000	0	1	0	6	0	0	NA	NA	FALSE	0	0	NA	NA	FALSE
chr1	61050005	61050123	NFIA	-27059	0	1	0	6	0	0	NA	NA	FALSE	0	0	NA	NA	FALSE
chr1	61053930	61054048	NFIA	-23134	0	1	0	6	0	0	NA	NA	FALSE	0	0	NA	NA	FALSE
chr1	61077074	61077192	NFIA	10	0	1	0	5	0	0	NA	NA	FALSE	0	0	NA	NA	FALSE
chr1	62175704	62175822	L1TD1	-19038	0	1	0	3	0	0	NA	NA	FALSE	0	0	NA	NA	FALSE
chr1	62391505	62391623	LOC105378768	-32251	0	1	0	4	0	0	NA	NA	FALSE	0	0	NA	NA	FALSE
chr1	62394832	62394950	LOC105378768	-28924	0	1	0	3	0	0	NA	NA	FALSE	0	0	NA	NA	FALSE
chr1	62436711	62437751	USP1	520	0	1	0	12	0	0	NA	NA	FALSE	0	0	NA	NA	FALSE
chr1	64240326	64240444	UBE2U	25497	0	1	0	3	0	0	NA	NA	FALSE	0	0	NA	NA	FALSE
chr1	64861716	64861834	JAK1	95242	0	1	0	4	0	0	NA	NA	FALSE	0	0	NA	NA	FALSE
chr1	64966228	64966628	JAK1	0	0	0	1	4	0	0	NA	NA	FALSE	0	0	NA	NA	FALSE
chr1	65041415	65041605	LOC107983962	10522	1	0	0	3	0	0	NA	NA	FALSE	0	0	NA	NA	FALSE
chr1	65063171	65063289	JAK1	4516	0	1	0	4	0	0	NA	NA	FALSE	0	0	NA	NA	FALSE
chr1	65075506	65075624	LOC107983962	-6924	0	1	0	3	0	0	NA	NA	FALSE	0	0	NA	NA	FALSE
chr1	65696872	65696990	PDE4B	-95578	0	1	0	3	0	0	NA	NA	FALSE	0	0	NA	NA	FALSE
chr1	66242813	66242931	PDE4B	-14558	0	1	0	4	0	0	NA	NA	FALSE	0	0	NA	NA	FALSE
chr1	66726184	66726302	TCTEX1D1	-25903	0	1	0	3	0	0	NA	NA	FALSE	0	0	NA	NA	FALSE
chr1	66752278	66752396	TCTEX1D1	-119	0	1	0	6	0	0	NA	NA	FALSE	0	0	NA	NA	FALSE
chr1	67134694	67134942	C1orf141	144	1	0	0	5	0	0	NA	NA	FALSE	0	0	NA	NA	FALSE
chr1	67500570	67500688	LOC102724481	-21226	0	1	0	4	0	0	NA	NA	FALSE	0	0	NA	NA	FALSE
chr1	67514489	67514607	LOC102724481	-7307	0	1	0	3	0	0	NA	NA	FALSE	0	0	NA	NA	FALSE
chr1	67524289	67524407	LOC102724481	2485	0	1	0	4	0	0	NA	NA	FALSE	0	0	NA	NA	FALSE
chr1	67532520	67532638	LOC102724481	2872	0	1	0	3	0	0	NA	NA	FALSE	0	0	NA	NA	FALSE
chr1	67761863	67761981	LOC105378781	7136	0	1	0	5	0	0	NA	NA	FALSE	0	0	NA	NA	FALSE
chr1	67766229	67766347	LOC105378781	11502	0	1	0	3	0	0	NA	NA	FALSE	0	0	NA	NA	FALSE
chr1	67795274	67795392	GNG12	36781	0	1	0	4	1	0.25	-2.525	7.06312e-14	TRUE	0	0	NA	NA	FALSE
chr1	67833107	67833507	GNG12	0	0	0	1	4	0	0	NA	NA	FALSE	0	0	NA	NA	FALSE
chr1	68046759	68046877	DIRAS3	4813	0	1	0	5	0	0	NA	NA	FALSE	0	0	NA	NA	FALSE
chr1	68051836	68051954	DIRAS3	-133	0	1	0	3	0	0	NA	NA	FALSE	0	0	NA	NA	FALSE
chr1	68112011	68112129	DIRAS3	-60308	0	1	0	3	0	0	NA	NA	FALSE	0	0	NA	NA	FALSE
chr1	68116782	68116900	DIRAS3	-65079	0	1	0	3	0	0	NA	NA	FALSE	0	0	NA	NA	FALSE
chr1	68120291	68120409	MIR1262	63260	0	1	0	3	0	0	NA	NA	FALSE	0	0	NA	NA	FALSE
chr1	68232222	68232622	WLS	0	0	0	1	3	0	0	NA	NA	FALSE	0	0	NA	NA	FALSE
chr1	68443206	68443324	RPE65	6694	0	1	0	5	0	0	NA	NA	FALSE	0	0	NA	NA	FALSE
chr1	68496775	68497175	DEPDC1	0	0	0	1	3	0	0	NA	NA	FALSE	0	0	NA	NA	FALSE
chr1	68497160	68497278	DEPDC1	2	0	1	0	4	0	0	NA	NA	FALSE	0	0	NA	NA	FALSE
chr1	70221385	70221785	SRSF11	0	0	0	1	3	0	0	NA	NA	FALSE	0	0	NA	NA	FALSE
chr1	70226723	70226841	SRSF11	-3247	0	1	0	4	0	0	NA	NA	FALSE	0	0	NA	NA	FALSE
chr1	73813828	73813946	LOC105378802	-206610	0	1	0	3	0	0	NA	NA	FALSE	0	0	NA	NA	FALSE
chr1	75214121	75214239	LHX8	77660	0	1	0	3	0	0	NA	NA	FALSE	0	0	NA	NA	FALSE
chr1	77084645	77084763	MIR7156	24562	0	1	0	4	0	0	NA	NA	FALSE	0	0	NA	NA	FALSE
chr1	77683082	77683200	ZZZ3	233	0	1	0	5	0	0	NA	NA	FALSE	0	0	NA	NA	FALSE
chr1	77683106	77683506	ZZZ3	0	0	0	1	3	0	0	NA	NA	FALSE	0	0	NA	NA	FALSE
chr1	77888181	77888299	NEXN	-274	0	1	0	4	0	0	NA	NA	FALSE	0	0	NA	NA	FALSE
chr1	78673254	78673372	IFI44	23522	0	1	0	3	0	0	NA	NA	FALSE	0	0	NA	NA	FALSE
chr1	79040755	79040963	ADGRL4	-34049	1	0	0	3	0	0	NA	NA	FALSE	0	0	NA	NA	FALSE
chr1	80779443	80779561	LOC101927412	138216	0	1	0	3	0	0	NA	NA	FALSE	0	0	NA	NA	FALSE
chr1	82759169	82759287	LOC107985396	-109154	0	1	0	3	0	0	NA	NA	FALSE	0	0	NA	NA	FALSE
chr1	83508987	83509145	LOC107985037	-14040	1	0	0	3	0	0	NA	NA	FALSE	0	0	NA	NA	FALSE
chr1	83860551	83860669	LOC101927560	-64	0	1	0	4	0	0	NA	NA	FALSE	0	0	NA	NA	FALSE
chr1	83882977	83883095	LOC107985041	21926	0	1	0	3	0	0	NA	NA	FALSE	0	0	NA	NA	FALSE
chr1	83998458	83999150	TTLL7	338	1	0	0	7	0	0	NA	NA	FALSE	0	0	NA	NA	FALSE
chr1	84077974	84079044	PRKACB	477	1	0	0	9	0	0	NA	NA	FALSE	0	0	NA	NA	FALSE
chr1	84156857	84157126	PRKACB	-7192	1	0	0	4	0	0	NA	NA	FALSE	0	0	NA	NA	FALSE
chr1	84162052	84162314	PRKACB	-2000	1	0	0	3	0	0	NA	NA	FALSE	0	0	NA	NA	FALSE
chr1	84173974	84174656	PRKACB	-7316	1	0	0	6	0	0	NA	NA	FALSE	0	0	NA	NA	FALSE
chr1	84572600	84572837	CTBS	1762	1	0	0	2	0	0	NA	NA	FALSE	0	0	NA	NA	FALSE
chr1	84572945	84574480	CTBS	768	1	0	0	11	0	0	NA	NA	FALSE	0	0	NA	NA	FALSE
chr1	84574146	84574546	CTBS	0	0	0	1	1	0	0	NA	NA	FALSE	0	0	NA	NA	FALSE
chr1	85259359	85259759	C1orf52	0	0	0	1	3	0	0	NA	NA	FALSE	0	0	NA	NA	FALSE
chr1	85259702	85259820	C1orf52	-89	0	1	0	4	0	0	NA	NA	FALSE	0	0	NA	NA	FALSE
chr1	85276254	85276654	BCL10	0	0	0	1	2	0	0	NA	NA	FALSE	0	0	NA	NA	FALSE
chr1	85276669	85276787	BCL10	176	0	1	0	6	0	0	NA	NA	FALSE	0	0	NA	NA	FALSE
chr1	85282535	85282653	BCL10	-5690	0	1	0	3	0	0	NA	NA	FALSE	0	0	NA	NA	FALSE
chr1	85308248	85308366	BCL10	-31403	0	1	0	4	0	0	NA	NA	FALSE	0	0	NA	NA	FALSE
chr1	86396001	86396401	ODF2L	0	0	0	1	1	0	0	NA	NA	FALSE	0	0	NA	NA	FALSE
chr1	86396108	86396226	ODF2L	-123	0	1	0	5	0	0	NA	NA	FALSE	0	0	NA	NA	FALSE
chr1	86704710	86705110	SH3GLB1	0	0	0	1	4	0	0	NA	NA	FALSE	0	0	NA	NA	FALSE
chr1	86742083	86742201	SH3GLB1	37543	0	1	0	4	0	0	NA	NA	FALSE	0	0	NA	NA	FALSE
chr1	86753832	86753950	SH3GLB1	49292	0	1	0	4	0	0	NA	NA	FALSE	0	0	NA	NA	FALSE
chr1	86781053	86781171	LOC105378831	44791	0	1	0	3	0	0	NA	NA	FALSE	0	0	NA	NA	FALSE
chr1	87120911	87121029	LINC01140	-8794	0	1	0	3	0	0	NA	NA	FALSE	0	0	NA	NA	FALSE
chr1	87131855	87131973	LINC01140	-11	0	1	0	4	0	0	NA	NA	FALSE	0	0	NA	NA	FALSE
chr1	87152019	87152137	LINC01140	20153	0	1	0	6	0	0	NA	NA	FALSE	0	0	NA	NA	FALSE
chr1	87155479	87155597	LINC01140	23613	0	1	0	4	0	0	NA	NA	FALSE	0	0	NA	NA	FALSE
chr1	87201290	87201503	LOC101927844	-1707	1	0	0	4	0	0	NA	NA	FALSE	0	0	NA	NA	FALSE
chr1	88612470	88612588	LOC105378838	-1874	0	1	0	4	0	0	NA	NA	FALSE	0	0	NA	NA	FALSE
chr1	88684060	88684178	PKN2	-24	0	1	0	4	0	0	NA	NA	FALSE	0	0	NA	NA	FALSE
chr1	88684171	88684571	PKN2	0	0	0	1	4	0	0	NA	NA	FALSE	0	0	NA	NA	FALSE
chr1	88736768	88736886	PKN2	-42574	0	1	0	7	0	0	NA	NA	FALSE	0	0	NA	NA	FALSE
chr1	88737399	88737517	PKN2	-41943	0	1	0	7	0	0	NA	NA	FALSE	0	0	NA	NA	FALSE
chr1	89259920	89260090	GBP5	12856	1	0	0	4	0	0	NA	NA	FALSE	0	0	NA	NA	FALSE
chr1	89483382	89483500	LOC105378844	-3469	0	1	0	3	0	0	NA	NA	FALSE	0	0	NA	NA	FALSE
chr1	89763081	89763199	LOC101927952	1389	0	1	0	6	0	0	NA	NA	FALSE	0	0	NA	NA	FALSE
chr1	89799519	89799637	LOC101927975	11209	0	1	0	4	0	0	NA	NA	FALSE	0	0	NA	NA	FALSE
chr1	89804778	89804896	LRRC8D	-16176	0	1	0	3	0	0	NA	NA	FALSE	0	0	NA	NA	FALSE
chr1	89820930	89821330	LRRC8D	0	0	0	1	2	0	0	NA	NA	FALSE	0	0	NA	NA	FALSE
chr1	89821256	89821374	LRRC8D	208	0	1	0	5	0	0	NA	NA	FALSE	0	0	NA	NA	FALSE
chr1	89823617	89823735	LRRC8D	1756	0	1	0	3	0	0	NA	NA	FALSE	0	0	NA	NA	FALSE
chr1	89824041	89824159	LRRC8D	2180	0	1	0	3	0	0	NA	NA	FALSE	0	0	NA	NA	FALSE
chr1	89834235	89834353	LRRC8D	-7956	0	1	0	4	0	0	NA	NA	FALSE	0	0	NA	NA	FALSE
chr1	90053622	90053740	ZNF326	58567	0	1	0	4	0	0	NA	NA	FALSE	0	0	NA	NA	FALSE
chr1	90704809	90704927	BARHL2	12369	0	1	0	3	0	0	NA	NA	FALSE	0	0	NA	NA	FALSE
chr1	90712351	90712469	BARHL2	4827	0	1	0	4	1	0.25	-2.63	1.03766e-25	TRUE	0	0	NA	NA	FALSE
chr1	90718715	90718833	BARHL2	-1537	0	1	0	6	0	0	NA	NA	FALSE	0	0	NA	NA	FALSE
chr1	90723839	90723957	BARHL2	-6661	0	1	0	6	0	0	NA	NA	FALSE	0	0	NA	NA	FALSE
chr1	90725724	90725842	BARHL2	-8546	0	1	0	4	0	0	NA	NA	FALSE	0	0	NA	NA	FALSE
chr1	90729579	90729697	BARHL2	-12401	0	1	0	4	0	0	NA	NA	FALSE	0	0	NA	NA	FALSE
chr1	90730930	90731048	BARHL2	-13752	0	1	0	4	0	0	NA	NA	FALSE	0	0	NA	NA	FALSE
chr1	91404472	91404590	HFM1	9	0	1	0	7	0	0	NA	NA	FALSE	0	0	NA	NA	FALSE
chr1	91476975	91477093	LOC107985417	20866	0	1	0	3	0	0	NA	NA	FALSE	0	0	NA	NA	FALSE
chr1	91500762	91501162	CDC7	0	0	0	1	4	1	0.25	-1.97	8.58552e-11	TRUE	0	0	NA	NA	FALSE
chr1	91501405	91501523	CDC7	357	0	1	0	5	1	0.2	-1.218	0.0103571	TRUE	0	0	NA	NA	FALSE
chr1	92298680	92299080	GLMN	0	0	0	1	3	1	0.333	-2.23	5.23383e-11	TRUE	0	0	NA	NA	FALSE
chr1	92298947	92299347	RPAP2	0	0	0	1	3	1	0.333	-2.23	5.23383e-11	TRUE	0	0	NA	NA	FALSE
chr1	92299040	92299158	RPAP2	77	0	1	0	5	3	0.6	-2.92	1.73619e-21	TRUE	0	0	NA	NA	FALSE
chr1	92859062	92859180	FAM69A	18029	0	1	0	4	0	0	NA	NA	FALSE	0	0	NA	NA	FALSE
chr1	92962522	92962659	FAM69A	-1068	1	0	0	3	0	0	NA	NA	FALSE	0	0	NA	NA	FALSE
chr1	93180116	93180516	TMED5	0	0	0	1	4	0	0	NA	NA	FALSE	0	0	NA	NA	FALSE
chr1	93180300	93180418	CCDC18	30	0	1	0	5	0	0	NA	NA	FALSE	0	0	NA	NA	FALSE
chr1	93180611	93181011	CCDC18	0	0	0	1	4	0	0	NA	NA	FALSE	0	0	NA	NA	FALSE
chr1	93608794	93608912	BCAR3	5111	0	1	0	3	0	0	NA	NA	FALSE	0	0	NA	NA	FALSE
chr1	93622866	93623118	BCAR3	-8847	1	0	0	4	0	0	NA	NA	FALSE	0	0	NA	NA	FALSE
[truncated: 27,172 more rows]

## Sheet: S4.4
SIDP_set	Hallmark_Set	pvalue	qvalue	Overlapping_Genes_Count	Overlapping_Genes
[truncated: 13 more rows]

[truncated: 1 more sheets: S4.5]
