# Supplementary material for: Genetic and epigenetic driven variation in regulatory regions activity contribute to adaptation and evolution under endocrine treatment
Source: Research Square preprint supplement (doi:10.21203/rs.3.rs-1432636/v1), 2022-03-30
Supplement: Supplementary file 4 [file b8350cbc78d22f11f33b40f0.xlsx]

## Sheet: S6.1
chrom	start	end	gene	gene_TSS_distance	ENHANCER	CTCF	PROMOTER	LTED_single_Expanded	MCF7_RM_single_Expanded	MCF7_WM_single_Expanded	LTED_single_Exhausted	MCF7_RM_single_Exhausted	MCF7_WM_single_Exhausted	LTED_multiple_Expanded	MCF7_RM_multiple_Expanded	MCF7_WM_multiple_Expanded	LTED_multiple_Exhausted	MCF7_RM_multiple_Exhausted	MCF7_WM_multiple_Exhausted
chr10	100297155	100297273	BLOC1S2	-10502	0	1	0	FALSE	FALSE	FALSE	TRUE	FALSE	FALSE	FALSE	FALSE	FALSE	FALSE	FALSE	FALSE
chr10	100826658	100828890	PAX2	82064	1	0	0	TRUE	FALSE	FALSE	TRUE	FALSE	FALSE	FALSE	FALSE	FALSE	FALSE	FALSE	FALSE
chr10	100912568	100913812	SLF2	239	1	0	0	FALSE	FALSE	FALSE	TRUE	TRUE	FALSE	FALSE	FALSE	FALSE	FALSE	FALSE	FALSE
chr10	100969421	100969821	SEMA4G	0	0	0	1	TRUE	FALSE	FALSE	FALSE	FALSE	FALSE	FALSE	FALSE	FALSE	FALSE	FALSE	FALSE
chr10	100987182	100987582	MRPL43	0	0	0	1	FALSE	FALSE	FALSE	TRUE	TRUE	FALSE	FALSE	FALSE	FALSE	FALSE	FALSE	FALSE
chr10	101010184	101010302	LZTS2	7747	0	1	0	TRUE	FALSE	FALSE	TRUE	FALSE	FALSE	FALSE	FALSE	FALSE	FALSE	FALSE	FALSE
chr10	101014400	101014518	LZTS2	11963	0	1	0	TRUE	FALSE	FALSE	FALSE	FALSE	FALSE	FALSE	FALSE	FALSE	FALSE	FALSE	FALSE
chr10	101041325	101041443	SFXN3	10146	0	1	0	TRUE	FALSE	FALSE	FALSE	FALSE	FALSE	FALSE	FALSE	FALSE	FALSE	FALSE	FALSE
chr10	101042753	101042871	SFXN3	11574	0	1	0	TRUE	FALSE	FALSE	FALSE	FALSE	FALSE	FALSE	FALSE	FALSE	FALSE	FALSE	FALSE
chr10	101048114	101048232	LOC107984262	12832	0	1	0	FALSE	FALSE	FALSE	TRUE	FALSE	FALSE	FALSE	FALSE	FALSE	FALSE	FALSE	FALSE
chr10	101061241	101062124	KAZALD1	441	1	0	0	FALSE	FALSE	FALSE	TRUE	FALSE	FALSE	FALSE	FALSE	FALSE	FALSE	FALSE	FALSE
chr10	101062186	101063084	KAZALD1	47	1	0	0	FALSE	FALSE	FALSE	TRUE	FALSE	FALSE	FALSE	FALSE	FALSE	FALSE	FALSE	FALSE
chr10	101694862	101695262	FBXW4	0	0	0	1	FALSE	FALSE	FALSE	TRUE	TRUE	FALSE	FALSE	FALSE	FALSE	FALSE	FALSE	FALSE
chr10	101840784	101840902	LOC107984042	901	0	1	0	TRUE	FALSE	FALSE	FALSE	FALSE	FALSE	FALSE	FALSE	FALSE	FALSE	FALSE	FALSE
chr10	101849020	101849138	LOC101927445	-1265	0	1	0	FALSE	FALSE	FALSE	TRUE	FALSE	FALSE	FALSE	FALSE	FALSE	FALSE	FALSE	FALSE
chr10	102055856	102056256	C10orf76	0	0	0	1	FALSE	FALSE	FALSE	TRUE	FALSE	FALSE	FALSE	FALSE	FALSE	FALSE	FALSE	FALSE
chr10	102117478	102117596	LDB1	-2571	0	1	0	TRUE	FALSE	FALSE	FALSE	FALSE	FALSE	FALSE	FALSE	FALSE	FALSE	FALSE	FALSE
chr10	102132947	102133347	PPRC1	0	0	0	1	FALSE	FALSE	FALSE	FALSE	TRUE	FALSE	FALSE	FALSE	FALSE	FALSE	FALSE	FALSE
chr10	102133747	102133865	PPRC1	771	0	1	0	FALSE	FALSE	FALSE	TRUE	FALSE	FALSE	FALSE	FALSE	FALSE	FALSE	FALSE	FALSE
chr10	102152113	102152231	NOLC1	-3	0	1	0	FALSE	FALSE	FALSE	TRUE	TRUE	FALSE	FALSE	FALSE	FALSE	TRUE	TRUE	FALSE
chr10	102152291	102152691	NOLC1	0	0	0	1	FALSE	FALSE	FALSE	TRUE	TRUE	TRUE	FALSE	FALSE	FALSE	TRUE	FALSE	TRUE
chr10	102420934	102422538	FBXL15	1456	1	0	0	TRUE	FALSE	FALSE	FALSE	FALSE	FALSE	TRUE	FALSE	FALSE	FALSE	FALSE	FALSE
chr10	102422539	102423050	FBXL15	2514	1	0	0	TRUE	FALSE	FALSE	FALSE	FALSE	FALSE	FALSE	FALSE	FALSE	FALSE	FALSE	FALSE
chr10	102461412	102462182	MFSD13A	370	1	0	0	TRUE	TRUE	FALSE	FALSE	FALSE	FALSE	FALSE	FALSE	FALSE	FALSE	FALSE	FALSE
chr10	102631290	102631408	TRIM8	-13134	0	1	0	TRUE	FALSE	FALSE	FALSE	FALSE	FALSE	FALSE	FALSE	FALSE	FALSE	FALSE	FALSE
chr10	102641867	102643005	TRIM8	-2047	0	1	0	TRUE	FALSE	FALSE	FALSE	FALSE	FALSE	FALSE	FALSE	FALSE	FALSE	FALSE	FALSE
chr10	102643009	102643494	TRIM8	-1232	1	0	0	TRUE	FALSE	FALSE	FALSE	FALSE	FALSE	FALSE	FALSE	FALSE	FALSE	FALSE	FALSE
chr10	102644378	102644778	TRIM8	0	0	0	1	TRUE	FALSE	FALSE	FALSE	FALSE	FALSE	FALSE	FALSE	FALSE	FALSE	FALSE	FALSE
chr10	103452335	103452453	CALHM2	-4	0	1	0	FALSE	FALSE	FALSE	TRUE	FALSE	FALSE	FALSE	FALSE	FALSE	FALSE	FALSE	FALSE
chr10	103476466	103476584	CALHM3	2715	0	1	0	FALSE	FALSE	FALSE	FALSE	TRUE	TRUE	FALSE	FALSE	FALSE	FALSE	FALSE	FALSE
chr10	103576784	103577046	NEURL1	18808	1	0	0	TRUE	FALSE	FALSE	FALSE	FALSE	FALSE	FALSE	FALSE	FALSE	FALSE	FALSE	FALSE
chr10	103658055	103658173	SH3PXD2A	4217	0	1	0	TRUE	FALSE	FALSE	FALSE	FALSE	FALSE	FALSE	FALSE	FALSE	FALSE	FALSE	FALSE
chr10	103699627	103699745	SH3PXD2A	-19711	0	1	0	TRUE	FALSE	FALSE	FALSE	FALSE	FALSE	FALSE	FALSE	FALSE	FALSE	FALSE	FALSE
chr10	103711709	103711827	SH3PXD2A	24351	0	1	0	FALSE	FALSE	FALSE	TRUE	FALSE	FALSE	FALSE	FALSE	FALSE	FALSE	FALSE	FALSE
chr10	103725270	103725401	SH3PXD2A	10784	1	0	0	TRUE	FALSE	FALSE	FALSE	FALSE	FALSE	FALSE	FALSE	FALSE	FALSE	FALSE	FALSE
chr10	103967184	103968400	SLK	608	1	0	0	FALSE	FALSE	FALSE	TRUE	TRUE	FALSE	FALSE	FALSE	FALSE	FALSE	FALSE	FALSE
chr10	104297896	104298014	GSTO2	22827	0	1	0	FALSE	FALSE	FALSE	TRUE	FALSE	FALSE	FALSE	FALSE	FALSE	FALSE	FALSE	FALSE
chr10	104324551	104324669	LOC101927472	1247	0	1	0	FALSE	FALSE	FALSE	TRUE	FALSE	FALSE	FALSE	FALSE	FALSE	FALSE	FALSE	FALSE
chr10	1048675	1048793	IDI1	149	0	1	0	FALSE	FALSE	FALSE	FALSE	TRUE	FALSE	FALSE	FALSE	FALSE	FALSE	FALSE	FALSE
chr10	1056301	1056701	WDR37	0	0	0	1	TRUE	FALSE	FALSE	FALSE	FALSE	FALSE	FALSE	FALSE	FALSE	FALSE	FALSE	FALSE
chr10	1056668	1056786	IDI1	-11	0	1	0	TRUE	FALSE	FALSE	FALSE	FALSE	FALSE	FALSE	FALSE	FALSE	FALSE	FALSE	FALSE
chr10	109884282	109884400	XPNPEP1	38905	0	1	0	TRUE	FALSE	FALSE	FALSE	FALSE	FALSE	FALSE	FALSE	FALSE	FALSE	FALSE	FALSE
chr10	109923172	109923572	XPNPEP1	0	0	0	1	FALSE	FALSE	TRUE	FALSE	FALSE	FALSE	FALSE	FALSE	FALSE	FALSE	FALSE	FALSE
chr10	110304122	110304964	SMNDC1	406	0	1	0	FALSE	FALSE	FALSE	TRUE	TRUE	TRUE	FALSE	FALSE	FALSE	TRUE	TRUE	FALSE
chr10	110304643	110305043	SMNDC1	0	0	0	1	FALSE	FALSE	FALSE	TRUE	TRUE	TRUE	FALSE	FALSE	FALSE	FALSE	FALSE	FALSE
chr10	110457985	110458982	LOC105378482	-10965	1	0	0	FALSE	FALSE	FALSE	TRUE	FALSE	FALSE	FALSE	FALSE	FALSE	FALSE	FALSE	FALSE
chr10	110459715	110460974	LOC105378482	-12826	1	0	0	TRUE	FALSE	FALSE	FALSE	FALSE	FALSE	FALSE	FALSE	FALSE	FALSE	FALSE	FALSE
chr10	110567690	110568630	SMC3	470	1	0	0	FALSE	FALSE	FALSE	TRUE	TRUE	TRUE	FALSE	FALSE	FALSE	TRUE	TRUE	FALSE
chr10	112374157	112374264	ACSL5	53	1	0	0	FALSE	FALSE	FALSE	FALSE	FALSE	TRUE	FALSE	FALSE	FALSE	FALSE	FALSE	FALSE
chr10	112456676	112456794	ZDHHC6	-8400	0	1	0	FALSE	FALSE	TRUE	FALSE	FALSE	FALSE	FALSE	FALSE	FALSE	FALSE	FALSE	FALSE
chr10	114103461	114103579	ADRB1	59474	0	1	0	TRUE	FALSE	FALSE	FALSE	FALSE	FALSE	FALSE	FALSE	FALSE	FALSE	FALSE	FALSE
chr10	114301340	114301458	LOC105378494	-18252	0	1	0	FALSE	TRUE	FALSE	FALSE	FALSE	FALSE	FALSE	FALSE	FALSE	FALSE	FALSE	FALSE
chr10	114304643	114305043	AFAP1L2	0	0	0	1	FALSE	FALSE	FALSE	FALSE	FALSE	TRUE	FALSE	FALSE	FALSE	FALSE	FALSE	FALSE
chr10	11509209	11509327	USP6NL	-8057	0	1	0	TRUE	FALSE	FALSE	TRUE	FALSE	FALSE	FALSE	FALSE	FALSE	FALSE	FALSE	FALSE
chr10	116627344	116627462	PNLIPRP2	6098	0	1	0	TRUE	FALSE	FALSE	FALSE	FALSE	FALSE	FALSE	FALSE	FALSE	FALSE	FALSE	FALSE
chr10	117226990	117227108	SLC18A2	-14023	0	1	0	TRUE	FALSE	TRUE	FALSE	FALSE	FALSE	TRUE	FALSE	FALSE	FALSE	FALSE	FALSE
chr10	117375417	117375535	PDZD8	-9	0	1	0	TRUE	FALSE	FALSE	FALSE	FALSE	FALSE	FALSE	FALSE	FALSE	FALSE	FALSE	FALSE
chr10	119029421	119029539	NANOS1	-235	0	1	0	FALSE	FALSE	FALSE	TRUE	FALSE	FALSE	FALSE	FALSE	FALSE	FALSE	FALSE	FALSE
chr10	119029715	119030962	NANOS1	623	0	1	0	TRUE	FALSE	FALSE	TRUE	TRUE	TRUE	FALSE	FALSE	FALSE	TRUE	FALSE	FALSE
chr10	119079673	119080822	EIF3A	575	1	0	0	FALSE	FALSE	FALSE	TRUE	TRUE	TRUE	FALSE	FALSE	FALSE	TRUE	TRUE	TRUE
chr10	12041712	12042841	UPF2	565	1	0	0	FALSE	FALSE	FALSE	TRUE	TRUE	FALSE	FALSE	FALSE	FALSE	FALSE	FALSE	FALSE
chr10	121974197	121975228	NSMCE4A	96	1	0	0	FALSE	FALSE	FALSE	TRUE	TRUE	TRUE	FALSE	FALSE	FALSE	TRUE	TRUE	FALSE
chr10	121974895	121975295	NSMCE4A	0	0	0	1	FALSE	FALSE	FALSE	TRUE	TRUE	TRUE	FALSE	FALSE	FALSE	TRUE	TRUE	FALSE
chr10	122112913	122113313	TACC2	0	0	0	1	FALSE	FALSE	FALSE	TRUE	TRUE	FALSE	FALSE	FALSE	FALSE	FALSE	FALSE	FALSE
chr10	122213934	122214052	TACC2	21765	0	1	0	TRUE	FALSE	FALSE	FALSE	FALSE	FALSE	FALSE	FALSE	FALSE	FALSE	FALSE	FALSE
chr10	12348314	12348542	CAMK1D	-1085	1	0	0	TRUE	FALSE	FALSE	FALSE	FALSE	FALSE	FALSE	FALSE	FALSE	FALSE	FALSE	FALSE
chr10	123573347	123573465	LOC105378530	-11979	0	1	0	FALSE	FALSE	FALSE	TRUE	TRUE	FALSE	FALSE	FALSE	FALSE	FALSE	FALSE	FALSE
chr10	1241341	1242775	LINC00200	82291	1	0	0	TRUE	FALSE	FALSE	FALSE	FALSE	FALSE	FALSE	FALSE	FALSE	FALSE	FALSE	FALSE
chr10	1242787	1243304	LINC00200	83278	1	0	0	TRUE	FALSE	FALSE	FALSE	FALSE	FALSE	FALSE	FALSE	FALSE	FALSE	FALSE	FALSE
chr10	124509998	124510116	LHPP	-3695	0	1	0	TRUE	FALSE	FALSE	FALSE	FALSE	FALSE	FALSE	FALSE	FALSE	FALSE	FALSE	FALSE
chr10	124520973	124521091	LHPP	7280	0	1	0	TRUE	FALSE	FALSE	FALSE	FALSE	FALSE	FALSE	FALSE	FALSE	FALSE	FALSE	FALSE
chr10	12483976	12485963	LOC107984209	11562	1	0	0	TRUE	FALSE	FALSE	FALSE	FALSE	FALSE	FALSE	FALSE	FALSE	FALSE	FALSE	FALSE
chr10	125823449	125823849	BCCIP	0	0	0	1	FALSE	FALSE	FALSE	TRUE	FALSE	FALSE	FALSE	FALSE	FALSE	FALSE	FALSE	FALSE
chr10	125896173	125896573	DHX32	0	0	0	1	FALSE	FALSE	FALSE	TRUE	FALSE	FALSE	FALSE	FALSE	FALSE	FALSE	FALSE	FALSE
chr10	125896477	125896877	FANK1	0	0	0	1	FALSE	FALSE	FALSE	TRUE	FALSE	FALSE	FALSE	FALSE	FALSE	FALSE	FALSE	FALSE
chr10	127907060	127909175	PTPRE	1042	1	0	0	FALSE	FALSE	FALSE	FALSE	TRUE	FALSE	FALSE	FALSE	FALSE	FALSE	FALSE	FALSE
chr10	128126072	128126472	MKI67	0	0	0	1	FALSE	FALSE	FALSE	FALSE	TRUE	FALSE	FALSE	FALSE	FALSE	FALSE	FALSE	FALSE
chr10	128150106	128150224	MKI67	-23760	0	1	0	FALSE	FALSE	FALSE	TRUE	FALSE	FALSE	FALSE	FALSE	FALSE	FALSE	FALSE	FALSE
chr10	13161298	13161416	MCM10	-196	0	1	0	FALSE	FALSE	FALSE	TRUE	TRUE	TRUE	FALSE	FALSE	FALSE	TRUE	TRUE	TRUE
chr10	13161465	13161865	MCM10	0	0	0	1	FALSE	FALSE	FALSE	TRUE	TRUE	FALSE	FALSE	FALSE	FALSE	TRUE	TRUE	FALSE
chr10	132035762	132038021	JAKMIP3	823	1	0	0	TRUE	FALSE	FALSE	FALSE	FALSE	FALSE	FALSE	FALSE	FALSE	FALSE	FALSE	FALSE
chr10	132454437	132454758	LOC105378570	4041	1	0	0	TRUE	FALSE	FALSE	FALSE	FALSE	FALSE	FALSE	FALSE	FALSE	FALSE	FALSE	FALSE
chr10	133261177	133262440	MIR202HG	-13923	1	0	0	FALSE	FALSE	FALSE	FALSE	TRUE	FALSE	FALSE	FALSE	FALSE	FALSE	FALSE	FALSE
chr10	133308565	133308965	TUBGCP2	0	0	0	1	FALSE	FALSE	FALSE	TRUE	FALSE	FALSE	FALSE	FALSE	FALSE	FALSE	FALSE	FALSE
chr10	133308815	133309215	ZNF511	0	0	0	1	FALSE	FALSE	FALSE	TRUE	FALSE	FALSE	FALSE	FALSE	FALSE	FALSE	FALSE	FALSE
chr10	133308888	133309156	ZNF511	134	1	0	0	FALSE	FALSE	FALSE	TRUE	FALSE	FALSE	FALSE	FALSE	FALSE	FALSE	FALSE	FALSE
chr10	133324756	133326386	CALY	2416	1	0	0	TRUE	FALSE	FALSE	TRUE	TRUE	TRUE	FALSE	FALSE	FALSE	FALSE	FALSE	FALSE
chr10	133379236	133380256	PAOX	510	1	0	0	FALSE	FALSE	FALSE	FALSE	TRUE	FALSE	FALSE	FALSE	FALSE	FALSE	TRUE	FALSE
chr10	13346134	13348298	SEPHS1	502	1	0	0	TRUE	FALSE	TRUE	TRUE	TRUE	TRUE	TRUE	FALSE	FALSE	TRUE	FALSE	FALSE
chr10	13348456	13348574	SEPHS1	-217	0	1	0	FALSE	FALSE	FALSE	TRUE	TRUE	TRUE	FALSE	FALSE	FALSE	TRUE	FALSE	FALSE
chr10	133520009	133520858	LOC105378575	-6174	1	0	0	FALSE	FALSE	TRUE	FALSE	FALSE	FALSE	FALSE	FALSE	FALSE	FALSE	FALSE	FALSE
chr10	13586805	13586923	PRPF18	54	0	1	0	FALSE	FALSE	FALSE	TRUE	TRUE	TRUE	FALSE	FALSE	FALSE	TRUE	FALSE	FALSE
chr10	13586872	13587272	PRPF18	0	0	0	1	FALSE	FALSE	FALSE	TRUE	FALSE	TRUE	FALSE	FALSE	FALSE	TRUE	FALSE	FALSE
chr10	13708567	13709087	LOC105376426	-1177	1	0	0	FALSE	FALSE	FALSE	FALSE	TRUE	FALSE	FALSE	FALSE	FALSE	FALSE	FALSE	FALSE
chr10	15035128	15036367	LOC105376432	-303	1	0	0	FALSE	FALSE	FALSE	FALSE	FALSE	TRUE	FALSE	FALSE	FALSE	FALSE	FALSE	FALSE
chr10	15088802	15088920	ACBD7	-85	0	1	0	TRUE	FALSE	FALSE	FALSE	FALSE	FALSE	FALSE	FALSE	FALSE	FALSE	FALSE	FALSE
chr10	15097179	15097435	C10orf111	12	0	1	0	FALSE	FALSE	FALSE	TRUE	TRUE	TRUE	FALSE	FALSE	FALSE	TRUE	FALSE	FALSE
chr10	15097265	15097665	RPP38	0	0	0	1	FALSE	FALSE	FALSE	TRUE	FALSE	FALSE	FALSE	FALSE	FALSE	FALSE	FALSE	FALSE
chr10	15168387	15168787	NMT2	0	0	0	1	TRUE	FALSE	FALSE	TRUE	FALSE	FALSE	FALSE	FALSE	FALSE	FALSE	FALSE	FALSE
chr10	15715955	15716073	ITGA8	4315	0	1	0	TRUE	FALSE	FALSE	FALSE	FALSE	FALSE	FALSE	FALSE	FALSE	FALSE	FALSE	FALSE
chr10	15719964	15720082	ITGA8	306	0	1	0	TRUE	FALSE	FALSE	FALSE	FALSE	FALSE	FALSE	FALSE	FALSE	FALSE	FALSE	FALSE
chr10	15860417	15860535	FAM188A	31	0	1	0	TRUE	FALSE	FALSE	FALSE	FALSE	FALSE	FALSE	FALSE	FALSE	FALSE	FALSE	FALSE
chr10	17910296	17910414	SLC39A12	-41483	0	1	0	TRUE	FALSE	FALSE	FALSE	FALSE	FALSE	FALSE	FALSE	FALSE	FALSE	FALSE	FALSE
chr10	18689633	18689751	LOC105376440	-20601	0	1	0	TRUE	FALSE	FALSE	FALSE	FALSE	FALSE	FALSE	FALSE	FALSE	FALSE	FALSE	FALSE
chr10	21494442	21495166	MIR1915	1837	1	0	0	FALSE	FALSE	FALSE	TRUE	FALSE	FALSE	FALSE	FALSE	FALSE	FALSE	FALSE	FALSE
chr10	21495296	21496641	MIR1915	673	1	0	0	TRUE	FALSE	FALSE	TRUE	FALSE	FALSE	FALSE	FALSE	FALSE	FALSE	FALSE	FALSE
chr10	21744328	21744601	LOC107984214	6985	1	0	0	TRUE	FALSE	FALSE	FALSE	TRUE	FALSE	FALSE	FALSE	FALSE	FALSE	FALSE	FALSE
chr10	21989801	21989919	DNAJC1	13861	0	1	0	TRUE	FALSE	FALSE	FALSE	FALSE	FALSE	FALSE	FALSE	FALSE	FALSE	FALSE	FALSE
chr10	22321209	22322297	BMI1	544	1	0	0	TRUE	FALSE	FALSE	FALSE	FALSE	FALSE	TRUE	FALSE	FALSE	FALSE	FALSE	FALSE
chr10	22322399	22322619	BMI1	1300	1	0	0	TRUE	FALSE	FALSE	FALSE	FALSE	FALSE	TRUE	FALSE	FALSE	FALSE	FALSE	FALSE
chr10	22325538	22325938	BMI1	0	0	0	1	FALSE	FALSE	FALSE	FALSE	TRUE	FALSE	FALSE	FALSE	FALSE	FALSE	FALSE	FALSE
chr10	22340001	22341751	SPAG6	-4539	1	0	0	FALSE	FALSE	FALSE	TRUE	FALSE	FALSE	FALSE	FALSE	FALSE	FALSE	FALSE	FALSE
chr10	22436432	22437929	LOC100289455	95	1	0	0	TRUE	FALSE	FALSE	FALSE	TRUE	FALSE	FALSE	FALSE	FALSE	FALSE	FALSE	FALSE
chr10	22690853	22691423	PIP4K2A	22137	1	0	0	FALSE	FALSE	FALSE	TRUE	FALSE	FALSE	FALSE	FALSE	FALSE	FALSE	FALSE	FALSE
chr10	23145909	23146027	PTF1A	-46562	0	1	0	TRUE	FALSE	FALSE	FALSE	FALSE	FALSE	FALSE	FALSE	FALSE	FALSE	FALSE	FALSE
chr10	23439268	23441125	OTUD1	928	1	0	0	TRUE	FALSE	FALSE	TRUE	TRUE	FALSE	FALSE	FALSE	FALSE	FALSE	FALSE	FALSE
chr10	23695076	23695387	KIAA1217	445	1	0	0	FALSE	FALSE	FALSE	TRUE	FALSE	FALSE	FALSE	FALSE	FALSE	FALSE	FALSE	FALSE
chr10	24255037	24257040	KIAA1217	1916	1	0	0	TRUE	FALSE	TRUE	TRUE	FALSE	FALSE	FALSE	FALSE	FALSE	FALSE	FALSE	FALSE
chr10	24569832	24569950	ARHGAP21	83360	0	1	0	TRUE	FALSE	FALSE	FALSE	FALSE	FALSE	FALSE	FALSE	FALSE	FALSE	FALSE	FALSE
chr10	24722301	24723668	ARHGAP21	-232	1	0	0	FALSE	FALSE	FALSE	FALSE	TRUE	TRUE	FALSE	FALSE	FALSE	FALSE	FALSE	TRUE
chr10	24951596	24952644	THNSL1	-198	1	0	0	TRUE	FALSE	FALSE	FALSE	FALSE	FALSE	FALSE	FALSE	FALSE	FALSE	FALSE	FALSE
chr10	25696167	25696285	LINC00836	44515	0	1	0	TRUE	FALSE	FALSE	FALSE	FALSE	FALSE	FALSE	FALSE	FALSE	FALSE	FALSE	FALSE
chr10	26438336	26439569	APBB1IP	616	1	0	0	TRUE	FALSE	FALSE	FALSE	FALSE	FALSE	FALSE	FALSE	FALSE	FALSE	FALSE	FALSE
chr10	26697423	26698735	PDSS1	656	1	0	0	FALSE	FALSE	FALSE	TRUE	FALSE	FALSE	FALSE	FALSE	FALSE	FALSE	FALSE	FALSE
chr10	27741999	27743614	MKX	739	1	0	0	FALSE	FALSE	TRUE	TRUE	FALSE	FALSE	FALSE	FALSE	FALSE	FALSE	FALSE	FALSE
chr10	30058659	30059559	LOC101929256	324	1	0	0	FALSE	FALSE	TRUE	FALSE	FALSE	FALSE	FALSE	FALSE	FALSE	FALSE	FALSE	FALSE
chr10	30349057	30349175	MTPAP	222	0	1	0	FALSE	FALSE	FALSE	TRUE	TRUE	TRUE	FALSE	FALSE	FALSE	TRUE	TRUE	FALSE
chr10	3078373	3078491	LOC101927824	-9159	0	1	0	FALSE	FALSE	TRUE	FALSE	FALSE	FALSE	FALSE	FALSE	FALSE	FALSE	FALSE	FALSE
chr10	3172482	3172882	PITRM1	0	0	0	1	FALSE	FALSE	FALSE	FALSE	TRUE	FALSE	FALSE	FALSE	FALSE	FALSE	FALSE	FALSE
chr10	31749254	31750828	LOC101929951	-42217	1	0	0	TRUE	FALSE	FALSE	FALSE	FALSE	FALSE	FALSE	FALSE	FALSE	FALSE	FALSE	FALSE
chr10	33133781	33134015	LOC101929447	-17057	1	0	0	TRUE	FALSE	FALSE	FALSE	FALSE	FALSE	FALSE	FALSE	FALSE	FALSE	FALSE	FALSE
chr10	34677744	34677862	PARD3	137299	0	1	0	FALSE	FALSE	FALSE	TRUE	FALSE	FALSE	FALSE	FALSE	FALSE	FALSE	FALSE	FALSE
chr10	34814998	34815398	PARD3	0	0	0	1	TRUE	FALSE	FALSE	FALSE	FALSE	TRUE	FALSE	FALSE	FALSE	FALSE	FALSE	FALSE
chr10	35089548	35090383	CUL2	393	1	0	0	TRUE	FALSE	FALSE	TRUE	TRUE	FALSE	FALSE	FALSE	FALSE	FALSE	FALSE	FALSE
chr10	35090035	35090435	CUL2	0	0	0	1	FALSE	FALSE	FALSE	TRUE	TRUE	FALSE	FALSE	FALSE	FALSE	FALSE	FALSE	FALSE
chr10	35126828	35126946	CREM	-4	0	1	0	TRUE	FALSE	FALSE	FALSE	FALSE	FALSE	FALSE	FALSE	FALSE	FALSE	FALSE	FALSE
chr10	35127456	35127880	CREM	212	1	0	0	TRUE	FALSE	FALSE	FALSE	FALSE	FALSE	FALSE	FALSE	FALSE	FALSE	FALSE	FALSE
chr10	35336417	35336817	CCNY	0	0	0	1	TRUE	FALSE	FALSE	FALSE	FALSE	FALSE	FALSE	FALSE	FALSE	FALSE	FALSE	FALSE
chr10	36887135	36887253	LOC105376496	55938	0	1	0	TRUE	FALSE	FALSE	FALSE	FALSE	FALSE	FALSE	FALSE	FALSE	FALSE	FALSE	FALSE
chr10	405684	405960	DIP2C	-31480	1	0	0	TRUE	FALSE	FALSE	FALSE	FALSE	FALSE	FALSE	FALSE	FALSE	FALSE	FALSE	FALSE
chr10	42782505	42783597	BMS1	253	1	0	0	FALSE	FALSE	FALSE	TRUE	TRUE	TRUE	FALSE	FALSE	FALSE	TRUE	TRUE	FALSE
chr10	43070922	43071040	RET	-6087	0	1	0	FALSE	FALSE	FALSE	TRUE	FALSE	FALSE	FALSE	FALSE	FALSE	FALSE	FALSE	FALSE
chr10	43104765	43106053	RET	28341	0	1	0	FALSE	FALSE	FALSE	TRUE	TRUE	TRUE	FALSE	FALSE	FALSE	FALSE	FALSE	FALSE
chr10	43221524	43221642	RASGEF1A	8156	0	1	0	FALSE	FALSE	FALSE	TRUE	TRUE	FALSE	FALSE	FALSE	FALSE	FALSE	FALSE	FALSE
chr10	43304593	43305520	LOC105378271	-13341	1	0	0	FALSE	FALSE	FALSE	TRUE	FALSE	FALSE	FALSE	FALSE	FALSE	FALSE	FALSE	FALSE
chr10	43436729	43436847	ZNF487	-337	0	1	0	TRUE	FALSE	TRUE	FALSE	FALSE	FALSE	FALSE	FALSE	FALSE	FALSE	FALSE	FALSE
chr10	43455687	43455805	ZNF487	18621	0	1	0	FALSE	FALSE	TRUE	FALSE	FALSE	FALSE	FALSE	FALSE	FALSE	FALSE	FALSE	FALSE
chr10	43574178	43574296	ZNF239	-112	0	1	0	FALSE	FALSE	FALSE	FALSE	TRUE	FALSE	FALSE	FALSE	FALSE	FALSE	FALSE	FALSE
chr10	43574294	43574694	ZNF239	0	0	0	1	FALSE	FALSE	FALSE	TRUE	FALSE	FALSE	FALSE	FALSE	FALSE	FALSE	FALSE	FALSE
chr10	44994600	44994718	ZNF22	-6165	0	1	0	FALSE	FALSE	FALSE	FALSE	TRUE	FALSE	FALSE	FALSE	FALSE	FALSE	FALSE	FALSE
chr10	45008750	45008868	C10orf25	-7899	0	1	0	TRUE	FALSE	FALSE	FALSE	FALSE	FALSE	FALSE	FALSE	FALSE	FALSE	FALSE	FALSE
chr10	46539703	46540610	GPRIN2	15885	1	0	0	TRUE	FALSE	FALSE	FALSE	FALSE	FALSE	FALSE	FALSE	FALSE	FALSE	FALSE	FALSE
chr10	47014010	47014128	PTPN20	37919	0	1	0	FALSE	FALSE	FALSE	FALSE	TRUE	FALSE	FALSE	FALSE	FALSE	FALSE	FALSE	FALSE
chr10	47021913	47022031	PTPN20	45822	0	1	0	TRUE	FALSE	FALSE	FALSE	FALSE	FALSE	FALSE	FALSE	FALSE	FALSE	FALSE	FALSE
chr10	47024873	47024991	PTPN20	48782	0	1	0	TRUE	FALSE	FALSE	FALSE	FALSE	FALSE	FALSE	FALSE	FALSE	FALSE	FALSE	FALSE
chr10	47403423	47403541	LOC107001062	-3682	0	1	0	FALSE	FALSE	FALSE	TRUE	FALSE	FALSE	FALSE	FALSE	FALSE	FALSE	FALSE	FALSE
chr10	47404187	47404305	LOC107001062	-2918	0	1	0	FALSE	FALSE	TRUE	TRUE	FALSE	FALSE	FALSE	FALSE	FALSE	FALSE	FALSE	FALSE
chr10	47404551	47404669	LOC107001062	-2554	0	1	0	FALSE	FALSE	TRUE	TRUE	FALSE	FALSE	FALSE	FALSE	FALSE	FALSE	FALSE	FALSE
chr10	49075704	49076145	VSTM4	39399	1	0	0	FALSE	FALSE	TRUE	FALSE	FALSE	FALSE	FALSE	FALSE	FALSE	FALSE	FALSE	FALSE
chr10	5513059	5513476	CALML3	-11621	1	0	0	FALSE	TRUE	FALSE	FALSE	FALSE	FALSE	FALSE	FALSE	FALSE	FALSE	FALSE	FALSE
chr10	58385320	58385720	TFAM	0	0	0	1	FALSE	FALSE	FALSE	TRUE	TRUE	FALSE	FALSE	FALSE	FALSE	FALSE	FALSE	FALSE
chr10	58385584	58385702	TFAM	234	0	1	0	FALSE	FALSE	FALSE	TRUE	TRUE	TRUE	FALSE	FALSE	FALSE	TRUE	TRUE	FALSE
chr10	58641322	58641594	BICC1	-3976	1	0	0	TRUE	FALSE	FALSE	FALSE	FALSE	FALSE	FALSE	FALSE	FALSE	FALSE	FALSE	FALSE
chr10	5895800	5895918	FBXO18	1474	0	1	0	TRUE	FALSE	FALSE	TRUE	FALSE	FALSE	FALSE	FALSE	FALSE	FALSE	FALSE	FALSE
chr10	5896505	5896623	FBXO18	2179	0	1	0	TRUE	FALSE	FALSE	TRUE	FALSE	FALSE	FALSE	FALSE	FALSE	FALSE	FALSE	FALSE
chr10	5906136	5906254	FBXO18	3176	0	1	0	FALSE	TRUE	FALSE	FALSE	FALSE	FALSE	FALSE	FALSE	FALSE	FALSE	FALSE	FALSE
chr10	6088943	6089343	RBM17	0	0	0	1	FALSE	FALSE	FALSE	TRUE	TRUE	FALSE	FALSE	FALSE	FALSE	FALSE	FALSE	FALSE
chr10	6089345	6090164	RBM17	409	1	0	0	FALSE	FALSE	FALSE	TRUE	FALSE	TRUE	FALSE	FALSE	FALSE	FALSE	FALSE	FALSE
chr10	6144877	6145247	PFKFB3	185	1	0	0	FALSE	FALSE	FALSE	FALSE	TRUE	FALSE	FALSE	FALSE	FALSE	FALSE	FALSE	FALSE
chr10	6162669	6164709	MIR3155B	-11427	1	0	0	FALSE	FALSE	FALSE	TRUE	FALSE	FALSE	FALSE	FALSE	FALSE	FALSE	FALSE	FALSE
chr10	61835242	61835360	LOC107984237	-13884	0	1	0	FALSE	FALSE	FALSE	FALSE	TRUE	FALSE	FALSE	FALSE	FALSE	FALSE	FALSE	FALSE
chr10	61897069	61897187	ARID5B	-4125	0	1	0	FALSE	FALSE	FALSE	TRUE	FALSE	FALSE	FALSE	FALSE	FALSE	FALSE	FALSE	FALSE
chr10	6202832	6203232	PFKFB3	0	0	0	1	TRUE	FALSE	FALSE	FALSE	FALSE	FALSE	FALSE	FALSE	FALSE	FALSE	FALSE	FALSE
chr10	62437745	62437863	LOC283045	-62677	0	1	0	TRUE	FALSE	FALSE	FALSE	FALSE	FALSE	FALSE	FALSE	FALSE	FALSE	FALSE	FALSE
chr10	63521362	63522075	JMJD1C	79	1	0	0	TRUE	FALSE	FALSE	FALSE	FALSE	FALSE	FALSE	FALSE	FALSE	FALSE	FALSE	FALSE
chr10	6445812	6445930	LOC107984202	-45951	0	1	0	TRUE	FALSE	FALSE	FALSE	FALSE	FALSE	FALSE	FALSE	FALSE	FALSE	FALSE	FALSE
chr10	68074016	68075346	HERC4	176	1	0	0	FALSE	FALSE	FALSE	TRUE	FALSE	FALSE	FALSE	FALSE	FALSE	FALSE	FALSE	FALSE
chr10	68406973	68407373	RUFY2	0	0	0	1	FALSE	FALSE	FALSE	TRUE	FALSE	FALSE	FALSE	FALSE	FALSE	FALSE	FALSE	FALSE
chr10	68471077	68471973	DNA2	448	1	0	0	FALSE	FALSE	FALSE	TRUE	TRUE	TRUE	FALSE	FALSE	FALSE	TRUE	TRUE	TRUE
chr10	689581	689981	DIP2C	0	0	0	1	FALSE	FALSE	FALSE	TRUE	FALSE	FALSE	FALSE	FALSE	FALSE	FALSE	FALSE	FALSE
chr10	68988720	68989588	KIF1BP	434	0	1	0	TRUE	FALSE	TRUE	TRUE	TRUE	FALSE	FALSE	FALSE	FALSE	FALSE	FALSE	FALSE
chr10	69359571	69361703	HK1	22396	1	0	0	TRUE	FALSE	FALSE	FALSE	FALSE	FALSE	FALSE	FALSE	FALSE	FALSE	FALSE	FALSE
chr10	69696256	69696374	LOC105378346	11417	0	1	0	TRUE	FALSE	FALSE	FALSE	FALSE	FALSE	FALSE	FALSE	FALSE	FALSE	FALSE	FALSE
chr10	69762381	69762499	COL13A1	-39444	0	1	0	TRUE	FALSE	FALSE	FALSE	FALSE	FALSE	FALSE	FALSE	FALSE	FALSE	FALSE	FALSE
chr10	70052600	70054290	H2AFY2	845	0	1	0	FALSE	FALSE	FALSE	TRUE	TRUE	TRUE	FALSE	FALSE	FALSE	FALSE	FALSE	FALSE
chr10	70132659	70132777	AIFM2	216	0	1	0	TRUE	FALSE	FALSE	FALSE	FALSE	FALSE	FALSE	FALSE	FALSE	FALSE	FALSE	FALSE
chr10	70145728	70146740	TYSND1	506	1	0	0	TRUE	FALSE	FALSE	TRUE	FALSE	FALSE	FALSE	FALSE	FALSE	FALSE	FALSE	FALSE
chr10	70147104	70147222	TYSND1	-423	0	1	0	TRUE	FALSE	FALSE	TRUE	FALSE	FALSE	FALSE	FALSE	FALSE	FALSE	FALSE	FALSE
chr10	70170626	70170744	SAR1A	-156	0	1	0	FALSE	FALSE	FALSE	FALSE	TRUE	FALSE	FALSE	FALSE	FALSE	FALSE	FALSE	FALSE
chr10	70308761	70308877	NPFFR1	-25125	1	0	0	TRUE	FALSE	FALSE	FALSE	FALSE	FALSE	FALSE	FALSE	FALSE	FALSE	FALSE	FALSE
chr10	70363695	70364959	LRRC20	12452	0	1	0	FALSE	FALSE	TRUE	FALSE	FALSE	FALSE	FALSE	FALSE	FALSE	FALSE	FALSE	FALSE
chr10	70382504	70382622	LRRC20	87	0	1	0	FALSE	FALSE	FALSE	TRUE	TRUE	FALSE	FALSE	FALSE	FALSE	FALSE	FALSE	FALSE
chr10	70458204	70459159	PALD1	140	0	1	0	TRUE	FALSE	FALSE	FALSE	FALSE	FALSE	FALSE	FALSE	FALSE	FALSE	FALSE	FALSE
chr10	70477951	70478069	PALD1	-748	0	1	0	FALSE	FALSE	FALSE	FALSE	FALSE	TRUE	FALSE	FALSE	FALSE	FALSE	FALSE	FALSE
chr10	70478340	70478458	PALD1	-359	0	1	0	FALSE	FALSE	FALSE	FALSE	FALSE	TRUE	FALSE	FALSE	FALSE	FALSE	FALSE	FALSE
chr10	70815947	70816970	SGPL1	75	1	0	0	FALSE	FALSE	FALSE	TRUE	FALSE	FALSE	FALSE	FALSE	FALSE	FALSE	FALSE	FALSE
chr10	70886389	70886625	PCBD1	1747	1	0	0	FALSE	FALSE	FALSE	TRUE	FALSE	FALSE	FALSE	FALSE	FALSE	FALSE	FALSE	FALSE
chr10	70886626	70887263	PCBD1	1310	1	0	0	FALSE	FALSE	FALSE	TRUE	FALSE	FALSE	FALSE	FALSE	FALSE	FALSE	FALSE	FALSE
chr10	70887352	70888254	PCBD1	451	1	0	0	FALSE	FALSE	FALSE	TRUE	FALSE	FALSE	FALSE	FALSE	FALSE	FALSE	FALSE	FALSE
chr10	71212451	71212851	UNC5B	0	0	0	1	FALSE	FALSE	FALSE	TRUE	FALSE	FALSE	FALSE	FALSE	FALSE	FALSE	FALSE	FALSE
chr10	71270430	71270548	UNC5B	-3432	0	1	0	TRUE	FALSE	FALSE	FALSE	FALSE	FALSE	FALSE	FALSE	FALSE	FALSE	FALSE	FALSE
chr10	71319071	71319189	SLC29A3	-122	0	1	0	FALSE	FALSE	FALSE	TRUE	FALSE	FALSE	FALSE	FALSE	FALSE	FALSE	FALSE	FALSE
chr10	71319252	71320013	SLC29A3	256	1	0	0	FALSE	FALSE	FALSE	TRUE	FALSE	FALSE	FALSE	FALSE	FALSE	FALSE	FALSE	FALSE
chr10	71682713	71682827	CDH23	-11842	1	0	0	FALSE	FALSE	FALSE	TRUE	FALSE	FALSE	FALSE	FALSE	FALSE	FALSE	FALSE	FALSE
chr10	71739811	71739929	CDH23	-1095	0	1	0	FALSE	FALSE	FALSE	FALSE	FALSE	TRUE	FALSE	FALSE	FALSE	FALSE	FALSE	FALSE
chr10	71765060	71766015	C10orf54	8043	0	1	0	FALSE	FALSE	FALSE	FALSE	FALSE	TRUE	FALSE	FALSE	FALSE	FALSE	FALSE	FALSE
chr10	71766040	71766465	C10orf54	7328	1	0	0	FALSE	FALSE	FALSE	FALSE	FALSE	TRUE	FALSE	FALSE	FALSE	FALSE	FALSE	FALSE
chr10	71766506	71768054	C10orf54	6300	1	0	0	FALSE	FALSE	FALSE	FALSE	FALSE	TRUE	FALSE	FALSE	FALSE	FALSE	FALSE	FALSE
chr10	71790844	71790962	MIR7152	157	0	1	0	FALSE	FALSE	FALSE	TRUE	TRUE	FALSE	FALSE	FALSE	FALSE	FALSE	FALSE	FALSE
chr10	71819770	71819888	CDH23	7947	0	1	0	TRUE	FALSE	FALSE	FALSE	FALSE	FALSE	FALSE	FALSE	FALSE	FALSE	FALSE	FALSE
chr10	71838420	71838538	PSAP	12896	0	1	0	FALSE	FALSE	FALSE	FALSE	FALSE	TRUE	FALSE	FALSE	FALSE	FALSE	FALSE	FALSE
chr10	71850948	71851348	PSAP	0	0	0	1	TRUE	FALSE	FALSE	FALSE	FALSE	FALSE	FALSE	FALSE	FALSE	FALSE	FALSE	FALSE
chr10	72014412	72014672	CHST3	46087	1	0	0	FALSE	FALSE	FALSE	FALSE	TRUE	FALSE	FALSE	FALSE	FALSE	FALSE	FALSE	FALSE
chr10	72297088	72298840	DDIT4	24046	1	0	0	FALSE	FALSE	FALSE	TRUE	FALSE	FALSE	FALSE	FALSE	FALSE	FALSE	FALSE	FALSE
chr10	72321972	72322905	DNAJB12	32562	1	0	0	TRUE	FALSE	FALSE	FALSE	FALSE	FALSE	FALSE	FALSE	FALSE	FALSE	FALSE	FALSE
chr10	72327976	72329131	DNAJB12	26447	1	0	0	FALSE	FALSE	FALSE	TRUE	TRUE	TRUE	FALSE	FALSE	FALSE	TRUE	FALSE	FALSE
chr10	72329287	72329788	DNAJB12	25463	1	0	0	FALSE	FALSE	FALSE	TRUE	FALSE	FALSE	FALSE	FALSE	FALSE	FALSE	FALSE	FALSE
chr10	72340554	72340672	DNAJB12	14387	0	1	0	FALSE	FALSE	FALSE	TRUE	TRUE	TRUE	FALSE	FALSE	FALSE	FALSE	FALSE	FALSE
chr10	72692618	72693866	MCU	624	1	0	0	TRUE	FALSE	FALSE	FALSE	FALSE	FALSE	TRUE	FALSE	FALSE	FALSE	FALSE	FALSE
chr10	73167704	73168104	ECD	0	0	0	1	FALSE	FALSE	FALSE	FALSE	TRUE	TRUE	FALSE	FALSE	FALSE	FALSE	FALSE	FALSE
chr10	73168020	73168420	FAM149B1	0	0	0	1	FALSE	FALSE	FALSE	FALSE	TRUE	TRUE	FALSE	FALSE	FALSE	FALSE	FALSE	FALSE
chr10	73168166	73168284	FAM149B1	90	0	1	0	FALSE	FALSE	FALSE	TRUE	FALSE	FALSE	FALSE	FALSE	FALSE	TRUE	FALSE	FALSE
chr10	73233002	73233120	DNAJC9	14270	0	1	0	FALSE	FALSE	FALSE	TRUE	FALSE	FALSE	FALSE	FALSE	FALSE	FALSE	FALSE	FALSE
chr10	73247020	73247138	DNAJC9	252	0	1	0	FALSE	FALSE	FALSE	FALSE	TRUE	FALSE	FALSE	FALSE	FALSE	FALSE	FALSE	FALSE
chr10	73624889	73626757	USP54	-175	1	0	0	TRUE	TRUE	FALSE	FALSE	FALSE	FALSE	FALSE	FALSE	FALSE	FALSE	FALSE	FALSE
chr10	73781961	73782079	CHCHD1	-29	0	1	0	FALSE	FALSE	FALSE	TRUE	TRUE	FALSE	FALSE	FALSE	FALSE	TRUE	TRUE	FALSE
chr10	73811294	73811694	NDST2	0	0	0	1	FALSE	FALSE	FALSE	TRUE	TRUE	FALSE	FALSE	FALSE	FALSE	FALSE	FALSE	FALSE
chr10	73873346	73874591	CAMK2G	-261	1	0	0	FALSE	FALSE	FALSE	FALSE	TRUE	TRUE	FALSE	FALSE	FALSE	FALSE	FALSE	FALSE
chr10	73886081	73888297	CAMK2G	-12598	1	0	0	TRUE	FALSE	FALSE	FALSE	TRUE	FALSE	FALSE	FALSE	FALSE	FALSE	FALSE	FALSE
chr10	73888471	73889569	CAMK2G	-14429	1	0	0	TRUE	FALSE	FALSE	FALSE	FALSE	FALSE	FALSE	FALSE	FALSE	FALSE	FALSE	FALSE
chr10	73911100	73911979	PLAU	439	1	0	0	FALSE	FALSE	TRUE	FALSE	FALSE	FALSE	FALSE	FALSE	FALSE	FALSE	FALSE	FALSE
chr10	74176660	74177060	ADK	0	0	0	1	FALSE	FALSE	FALSE	TRUE	TRUE	TRUE	FALSE	FALSE	FALSE	TRUE	FALSE	FALSE
chr10	7475516	7475634	LOC105376388	-2672	0	1	0	FALSE	FALSE	FALSE	TRUE	FALSE	FALSE	FALSE	FALSE	FALSE	FALSE	FALSE	FALSE
chr10	75234004	75236012	COMTD1	1004	0	1	0	FALSE	FALSE	FALSE	TRUE	TRUE	TRUE	FALSE	FALSE	FALSE	TRUE	FALSE	FALSE
chr10	75407369	75408156	LOC101929234	-1394	1	0	0	FALSE	TRUE	FALSE	FALSE	FALSE	FALSE	FALSE	FALSE	FALSE	FALSE	FALSE	FALSE
chr10	77817732	77817850	DLG5	30043	0	1	0	FALSE	FALSE	FALSE	TRUE	TRUE	FALSE	FALSE	FALSE	FALSE	FALSE	FALSE	FALSE
chr10	77836523	77836641	DLG5	11252	0	1	0	FALSE	FALSE	FALSE	TRUE	FALSE	FALSE	FALSE	FALSE	FALSE	FALSE	FALSE	FALSE
chr10	77837746	77837864	DLG5	10029	0	1	0	FALSE	FALSE	FALSE	TRUE	FALSE	FALSE	FALSE	FALSE	FALSE	FALSE	FALSE	FALSE
chr10	7787673	7788073	KIN	0	0	0	1	TRUE	FALSE	FALSE	TRUE	TRUE	FALSE	FALSE	FALSE	FALSE	FALSE	FALSE	FALSE
chr10	7788075	7788475	ATP5C1	0	0	0	1	TRUE	FALSE	FALSE	TRUE	TRUE	FALSE	FALSE	FALSE	FALSE	FALSE	FALSE	FALSE
chr10	77926447	77926847	DLG5	0	0	0	1	FALSE	FALSE	FALSE	TRUE	TRUE	FALSE	FALSE	FALSE	FALSE	FALSE	FALSE	FALSE
chr10	77984069	77984187	POLR3A	45412	0	1	0	FALSE	FALSE	FALSE	TRUE	FALSE	FALSE	FALSE	FALSE	FALSE	FALSE	FALSE	FALSE
chr10	78029206	78029606	POLR3A	0	0	0	1	FALSE	FALSE	FALSE	TRUE	TRUE	FALSE	FALSE	FALSE	FALSE	TRUE	FALSE	FALSE
chr10	78029592	78029710	POLR3A	-111	0	1	0	FALSE	FALSE	FALSE	TRUE	TRUE	TRUE	FALSE	FALSE	FALSE	TRUE	TRUE	TRUE
chr10	78033763	78034163	RPS24	0	0	0	1	TRUE	FALSE	FALSE	TRUE	TRUE	TRUE	FALSE	FALSE	FALSE	FALSE	FALSE	FALSE
chr10	78034152	78034270	RPS24	452	0	1	0	FALSE	FALSE	FALSE	TRUE	TRUE	TRUE	FALSE	FALSE	FALSE	TRUE	TRUE	TRUE
chr10	78302624	78303891	LINC00595	35930	1	0	0	TRUE	FALSE	FALSE	FALSE	FALSE	FALSE	FALSE	FALSE	FALSE	FALSE	FALSE	FALSE
chr10	79078832	79080236	ZMIZ1	10500	1	0	0	TRUE	FALSE	FALSE	TRUE	FALSE	FALSE	FALSE	FALSE	FALSE	FALSE	FALSE	FALSE
chr10	79081142	79082140	ZMIZ1	12607	1	0	0	FALSE	FALSE	FALSE	TRUE	TRUE	TRUE	FALSE	FALSE	FALSE	FALSE	TRUE	FALSE
chr10	79263223	79263670	ZMIZ1	-4217	1	0	0	FALSE	FALSE	FALSE	TRUE	TRUE	FALSE	FALSE	FALSE	FALSE	FALSE	FALSE	FALSE
chr10	79263962	79264367	ZMIZ1	-3499	1	0	0	FALSE	FALSE	FALSE	TRUE	TRUE	FALSE	FALSE	FALSE	FALSE	FALSE	FALSE	FALSE
chr10	79270476	79271515	ZMIZ1	3332	1	0	0	TRUE	FALSE	FALSE	FALSE	FALSE	FALSE	FALSE	FALSE	FALSE	FALSE	FALSE	FALSE
chr10	79446627	79446934	LOC105378383	-15	1	0	0	TRUE	FALSE	FALSE	FALSE	FALSE	FALSE	FALSE	FALSE	FALSE	FALSE	FALSE	FALSE
chr10	79491328	79491446	LOC729815	19595	0	1	0	TRUE	FALSE	FALSE	FALSE	FALSE	FALSE	FALSE	FALSE	FALSE	FALSE	FALSE	FALSE
chr10	79981413	79982746	SFTPD	157	1	0	0	FALSE	FALSE	FALSE	TRUE	FALSE	FALSE	FALSE	FALSE	FALSE	FALSE	FALSE	FALSE
chr10	8046191	8046416	GATA3	883	1	0	0	FALSE	FALSE	FALSE	TRUE	FALSE	FALSE	FALSE	FALSE	FALSE	FALSE	FALSE	FALSE
chr10	8046748	8047004	GATA3	1456	1	0	0	FALSE	FALSE	FALSE	TRUE	FALSE	FALSE	FALSE	FALSE	FALSE	FALSE	FALSE	FALSE
chr10	8048561	8049128	GATA3	3424	1	0	0	TRUE	FALSE	FALSE	TRUE	FALSE	FALSE	FALSE	FALSE	FALSE	FALSE	FALSE	FALSE
chr10	80505199	80506126	LOC102723703	-25587	1	0	0	FALSE	FALSE	FALSE	FALSE	TRUE	FALSE	FALSE	FALSE	FALSE	FALSE	FALSE	FALSE
chr10	80506177	80506403	LOC102723703	-24959	1	0	0	FALSE	FALSE	FALSE	FALSE	TRUE	FALSE	FALSE	FALSE	FALSE	FALSE	FALSE	FALSE
chr10	8054582	8054982	GATA3	0	0	0	1	FALSE	FALSE	FALSE	TRUE	TRUE	TRUE	FALSE	FALSE	FALSE	TRUE	TRUE	FALSE
chr10	81874230	81874348	NRG3	-1008	0	1	0	FALSE	FALSE	FALSE	TRUE	FALSE	FALSE	FALSE	FALSE	FALSE	FALSE	FALSE	FALSE
chr10	84237384	84237502	LRIT1	-322	0	1	0	FALSE	FALSE	FALSE	TRUE	TRUE	TRUE	FALSE	FALSE	FALSE	FALSE	FALSE	FALSE
chr10	84540629	84540747	CCSER2	115507	0	1	0	TRUE	FALSE	FALSE	FALSE	FALSE	FALSE	FALSE	FALSE	FALSE	FALSE	FALSE	FALSE
chr10	86366496	86366896	GRID1	0	0	0	1	FALSE	FALSE	FALSE	TRUE	FALSE	FALSE	FALSE	FALSE	FALSE	FALSE	FALSE	FALSE
chr10	86389764	86389882	GRID1	-23330	0	1	0	TRUE	FALSE	FALSE	FALSE	FALSE	FALSE	FALSE	FALSE	FALSE	FALSE	FALSE	FALSE
chr10	86632275	86632393	OPN4	-21160	0	1	0	FALSE	FALSE	FALSE	TRUE	FALSE	FALSE	FALSE	FALSE	FALSE	FALSE	FALSE	FALSE
chr10	86683694	86683812	LDB3	-6793	0	1	0	FALSE	FALSE	FALSE	FALSE	FALSE	TRUE	FALSE	FALSE	FALSE	FALSE	FALSE	FALSE
chr10	86684370	86684488	LDB3	-6117	0	1	0	FALSE	FALSE	FALSE	TRUE	TRUE	TRUE	FALSE	FALSE	FALSE	FALSE	FALSE	FALSE
chr10	86710543	86712702	LDB3	21076	0	1	0	TRUE	FALSE	FALSE	FALSE	FALSE	FALSE	FALSE	FALSE	FALSE	FALSE	FALSE	FALSE
chr10	86756509	86756909	BMPR1A	0	0	0	1	TRUE	FALSE	FALSE	FALSE	FALSE	FALSE	FALSE	FALSE	FALSE	FALSE	FALSE	FALSE
chr10	86942904	86943022	MMRN2	14622	0	1	0	FALSE	FALSE	FALSE	TRUE	FALSE	FALSE	FALSE	FALSE	FALSE	FALSE	FALSE	FALSE
chr10	86945681	86945799	MMRN2	11845	0	1	0	FALSE	FALSE	TRUE	FALSE	FALSE	FALSE	FALSE	FALSE	FALSE	FALSE	FALSE	FALSE
chr10	86966408	86967389	ADIRF	-1532	0	1	0	FALSE	FALSE	FALSE	FALSE	TRUE	FALSE	FALSE	FALSE	FALSE	FALSE	FALSE	FALSE
chr10	87861528	87862437	KLLN	1455	1	0	0	TRUE	FALSE	FALSE	FALSE	FALSE	FALSE	FALSE	FALSE	FALSE	FALSE	FALSE	FALSE
chr10	88838871	88838989	ANKRD22	13045	0	1	0	TRUE	FALSE	FALSE	FALSE	FALSE	FALSE	FALSE	FALSE	FALSE	FALSE	FALSE	FALSE
chr10	89206804	89206922	CH25H	451	0	1	0	TRUE	FALSE	FALSE	FALSE	FALSE	FALSE	FALSE	FALSE	FALSE	FALSE	FALSE	FALSE
chr10	89414567	89415883	IFIT5	658	1	0	0	TRUE	FALSE	FALSE	TRUE	FALSE	FALSE	FALSE	FALSE	FALSE	FALSE	FALSE	FALSE
chr10	89644679	89644797	PANK1	-195	0	1	0	FALSE	FALSE	FALSE	TRUE	FALSE	FALSE	FALSE	FALSE	FALSE	FALSE	FALSE	FALSE
chr10	89644933	89645333	PANK1	0	0	0	1	FALSE	FALSE	FALSE	TRUE	FALSE	FALSE	FALSE	FALSE	FALSE	FALSE	FALSE	FALSE
chr10	89836917	89838426	LOC105378424	-7367	1	0	0	FALSE	FALSE	FALSE	FALSE	FALSE	TRUE	FALSE	FALSE	FALSE	FALSE	FALSE	FALSE
chr10	90871342	90871460	RPP30	-121	0	1	0	FALSE	FALSE	FALSE	FALSE	TRUE	FALSE	FALSE	FALSE	FALSE	FALSE	FALSE	FALSE
chr10	90871951	90872646	RPP30	347	1	0	0	FALSE	FALSE	FALSE	TRUE	TRUE	TRUE	FALSE	FALSE	FALSE	TRUE	TRUE	FALSE
chr10	91220601	91221676	PCGF5	-192	1	0	0	TRUE	FALSE	FALSE	FALSE	FALSE	FALSE	FALSE	FALSE	FALSE	FALSE	FALSE	FALSE
chr10	91923699	91924099	BTAF1	0	0	0	1	FALSE	FALSE	FALSE	TRUE	TRUE	TRUE	FALSE	FALSE	FALSE	TRUE	TRUE	FALSE
chr10	92695784	92696125	HHEX	6031	1	0	0	FALSE	FALSE	FALSE	TRUE	FALSE	FALSE	FALSE	FALSE	FALSE	FALSE	FALSE	FALSE
chr10	95334042	95335265	PDLIM1	-43505	1	0	0	FALSE	FALSE	FALSE	FALSE	FALSE	TRUE	FALSE	FALSE	FALSE	FALSE	FALSE	FALSE
chr10	95907964	95908227	C10orf131	131	1	0	0	TRUE	FALSE	FALSE	FALSE	FALSE	FALSE	FALSE	FALSE	FALSE	FALSE	FALSE	FALSE
chr10	96043248	96043366	CCNJ	-94	0	1	0	TRUE	FALSE	FALSE	FALSE	FALSE	FALSE	FALSE	FALSE	FALSE	FALSE	FALSE	FALSE
chr10	96130055	96131252	ZNF518A	525	1	0	0	FALSE	FALSE	FALSE	TRUE	FALSE	FALSE	FALSE	FALSE	FALSE	FALSE	FALSE	FALSE
chr10	97319264	97321715	FRAT1	1225	1	0	0	TRUE	FALSE	FALSE	FALSE	FALSE	FALSE	TRUE	FALSE	FALSE	FALSE	FALSE	FALSE
chr10	97676792	97676910	AVPI1	10407	0	1	0	TRUE	FALSE	FALSE	FALSE	FALSE	FALSE	TRUE	FALSE	FALSE	FALSE	FALSE	FALSE
chr10	97684108	97684226	AVPI1	3091	0	1	0	TRUE	FALSE	FALSE	FALSE	FALSE	FALSE	FALSE	FALSE	FALSE	FALSE	FALSE	FALSE
chr10	97737120	97737476	ZFYVE27	171	0	1	0	TRUE	FALSE	FALSE	FALSE	FALSE	FALSE	FALSE	FALSE	FALSE	FALSE	FALSE	FALSE
chr10	97849766	97850166	GOLGA7B	0	0	0	1	FALSE	FALSE	FALSE	TRUE	FALSE	FALSE	FALSE	FALSE	FALSE	FALSE	FALSE	FALSE
chr10	98414475	98415221	PYROXD2	232	1	0	0	TRUE	FALSE	FALSE	FALSE	FALSE	FALSE	FALSE	FALSE	FALSE	FALSE	FALSE	FALSE
chr10	98423783	98423901	MIR4685	7518	0	1	0	FALSE	FALSE	TRUE	FALSE	FALSE	FALSE	FALSE	FALSE	FALSE	FALSE	FALSE	FALSE
chr10	99621088	99621206	SLC25A28	-205	0	1	0	TRUE	FALSE	FALSE	FALSE	FALSE	FALSE	FALSE	FALSE	FALSE	FALSE	FALSE	FALSE
chr10	99710067	99710185	COX15	22005	0	1	0	FALSE	FALSE	FALSE	FALSE	FALSE	TRUE	FALSE	FALSE	FALSE	FALSE	FALSE	FALSE
chr11	10498872	10499113	MIR4485	9334	1	0	0	TRUE	FALSE	FALSE	FALSE	FALSE	FALSE	FALSE	FALSE	FALSE	FALSE	FALSE	FALSE
chr11	1050402	1051612	LOC101927503	-748	1	0	0	FALSE	FALSE	FALSE	TRUE	FALSE	FALSE	FALSE	FALSE	FALSE	FALSE	FALSE	FALSE
chr11	1054014	1055071	LOC101927503	2455	1	0	0	FALSE	FALSE	FALSE	TRUE	FALSE	FALSE	FALSE	FALSE	FALSE	FALSE	FALSE	FALSE
chr11	106077034	106077434	KBTBD3	0	0	0	1	FALSE	FALSE	FALSE	TRUE	TRUE	FALSE	FALSE	FALSE	FALSE	FALSE	FALSE	FALSE
chr11	106077564	106077964	AASDHPPT	0	0	0	1	FALSE	FALSE	FALSE	TRUE	TRUE	FALSE	FALSE	FALSE	FALSE	FALSE	FALSE	FALSE
chr11	1071639	1072632	LOC107987157	1299	1	0	0	TRUE	FALSE	FALSE	TRUE	FALSE	FALSE	FALSE	FALSE	FALSE	FALSE	FALSE	FALSE
chr11	10751131	10751531	CTR9	0	0	0	1	FALSE	FALSE	FALSE	TRUE	TRUE	TRUE	FALSE	FALSE	FALSE	FALSE	FALSE	FALSE
chr11	10751240	10751358	CTR9	313	0	1	0	FALSE	FALSE	FALSE	TRUE	TRUE	TRUE	FALSE	FALSE	FALSE	TRUE	TRUE	TRUE
chr11	107565431	107565831	ALKBH8	0	0	0	1	FALSE	FALSE	FALSE	FALSE	TRUE	FALSE	FALSE	FALSE	FALSE	FALSE	FALSE	FALSE
chr11	108008681	108010118	CUL5	63	0	1	0	FALSE	FALSE	FALSE	TRUE	FALSE	TRUE	FALSE	FALSE	FALSE	TRUE	FALSE	FALSE
chr11	10807725	10807996	EIF4G2	136	1	0	0	FALSE	FALSE	TRUE	FALSE	FALSE	FALSE	FALSE	FALSE	FALSE	FALSE	FALSE	FALSE
chr11	10808622	10808740	EIF4G2	354	0	1	0	FALSE	FALSE	FALSE	TRUE	FALSE	FALSE	FALSE	FALSE	FALSE	TRUE	FALSE	FALSE
chr11	109939327	109939445	LOC105369484	-7163	0	1	0	FALSE	FALSE	TRUE	FALSE	FALSE	FALSE	FALSE	FALSE	FALSE	FALSE	FALSE	FALSE
chr11	110429936	110431734	FDX1	899	0	1	0	TRUE	FALSE	FALSE	TRUE	TRUE	FALSE	FALSE	FALSE	FALSE	TRUE	TRUE	FALSE
chr11	111514632	111514750	C11orf88	-93	0	1	0	TRUE	FALSE	FALSE	FALSE	FALSE	FALSE	FALSE	FALSE	FALSE	FALSE	FALSE	FALSE
chr11	111557538	111557656	LAYN	16046	0	1	0	TRUE	TRUE	TRUE	FALSE	FALSE	FALSE	FALSE	FALSE	FALSE	FALSE	FALSE	FALSE
chr11	111558096	111558214	LAYN	16604	0	1	0	TRUE	TRUE	TRUE	FALSE	FALSE	FALSE	FALSE	FALSE	FALSE	FALSE	FALSE	FALSE
chr11	112086448	112086848	TIMM8B	0	0	0	1	FALSE	FALSE	FALSE	TRUE	TRUE	TRUE	FALSE	FALSE	FALSE	FALSE	FALSE	FALSE
chr11	112086602	112086720	TIMM8B	137	0	1	0	FALSE	FALSE	FALSE	TRUE	FALSE	FALSE	FALSE	FALSE	FALSE	FALSE	FALSE	FALSE
chr11	112086771	112087171	SDHD	0	0	0	1	FALSE	FALSE	FALSE	TRUE	TRUE	TRUE	FALSE	FALSE	FALSE	FALSE	FALSE	FALSE
chr11	112088005	112088123	SDHD	1241	0	1	0	TRUE	FALSE	FALSE	FALSE	FALSE	FALSE	FALSE	FALSE	FALSE	FALSE	FALSE	FALSE
chr11	112163933	112164051	IL18	108	0	1	0	TRUE	FALSE	FALSE	FALSE	FALSE	FALSE	FALSE	FALSE	FALSE	FALSE	FALSE	FALSE
chr11	113274850	113274968	NCAM1-AS1	-1008	0	1	0	FALSE	FALSE	FALSE	TRUE	FALSE	FALSE	FALSE	FALSE	FALSE	FALSE	FALSE	FALSE
chr11	113289713	113289831	NCAM1-AS1	-15871	0	1	0	TRUE	FALSE	FALSE	FALSE	FALSE	FALSE	FALSE	FALSE	FALSE	FALSE	FALSE	FALSE
chr11	113797625	113797743	CLDN25	17889	0	1	0	TRUE	FALSE	FALSE	FALSE	FALSE	FALSE	FALSE	FALSE	FALSE	FALSE	FALSE	FALSE
chr11	113875292	113875410	USP28	156	0	1	0	FALSE	TRUE	TRUE	FALSE	FALSE	FALSE	FALSE	TRUE	TRUE	FALSE	FALSE	FALSE
chr11	114239659	114239777	NNMT	-56094	0	1	0	FALSE	FALSE	TRUE	FALSE	FALSE	FALSE	FALSE	FALSE	FALSE	FALSE	FALSE	FALSE
chr11	114258013	114258131	NNMT	-37740	0	1	0	FALSE	TRUE	FALSE	FALSE	FALSE	FALSE	FALSE	FALSE	FALSE	FALSE	FALSE	FALSE
chr11	114277635	114277753	NNMT	-18118	0	1	0	FALSE	FALSE	FALSE	TRUE	FALSE	FALSE	FALSE	FALSE	FALSE	FALSE	FALSE	FALSE
chr11	116772357	116772998	BUD13	60	1	0	0	FALSE	FALSE	FALSE	TRUE	TRUE	TRUE	FALSE	FALSE	FALSE	TRUE	TRUE	TRUE
chr11	116772687	116773087	BUD13	0	0	0	1	FALSE	FALSE	FALSE	FALSE	TRUE	TRUE	FALSE	FALSE	FALSE	FALSE	FALSE	FALSE
chr11	117144189	117144589	PAFAH1B2	0	0	0	1	FALSE	FALSE	FALSE	TRUE	FALSE	FALSE	FALSE	FALSE	FALSE	FALSE	FALSE	FALSE
chr11	117179222	117180599	SIDT2	688	1	0	0	TRUE	FALSE	FALSE	FALSE	FALSE	FALSE	FALSE	FALSE	FALSE	FALSE	FALSE	FALSE
chr11	117180965	117181819	SIDT2	2170	0	1	0	FALSE	FALSE	FALSE	TRUE	FALSE	FALSE	FALSE	FALSE	FALSE	FALSE	FALSE	FALSE
chr11	117232500	117232618	PCSK7	-34	0	1	0	FALSE	FALSE	FALSE	TRUE	TRUE	FALSE	FALSE	FALSE	FALSE	FALSE	FALSE	FALSE
chr11	117232560	117232960	RNF214	0	0	0	1	TRUE	FALSE	FALSE	FALSE	FALSE	FALSE	FALSE	FALSE	FALSE	FALSE	FALSE	FALSE
chr11	117356414	117356532	CEP164	4573	0	1	0	FALSE	FALSE	TRUE	FALSE	FALSE	FALSE	FALSE	FALSE	FALSE	FALSE	FALSE	FALSE
chr11	117366311	117366429	CEP164	14470	0	1	0	FALSE	FALSE	TRUE	FALSE	FALSE	FALSE	FALSE	FALSE	FALSE	FALSE	FALSE	FALSE
chr11	118114345	118114463	LOC105369517	-15426	0	1	0	FALSE	FALSE	FALSE	TRUE	FALSE	FALSE	FALSE	FALSE	FALSE	FALSE	FALSE	FALSE
chr11	118171745	118171863	SCN2B	4818	0	1	0	FALSE	FALSE	FALSE	TRUE	TRUE	FALSE	FALSE	FALSE	FALSE	FALSE	FALSE	FALSE
chr11	118251702	118252368	MPZL3	333	1	0	0	FALSE	FALSE	FALSE	TRUE	FALSE	FALSE	FALSE	FALSE	FALSE	FALSE	FALSE	FALSE
chr11	118315505	118315623	CD3E	10985	0	1	0	FALSE	FALSE	TRUE	FALSE	TRUE	FALSE	FALSE	FALSE	FALSE	FALSE	FALSE	FALSE
chr11	118359509	118359909	UBE4A	0	0	0	1	FALSE	FALSE	FALSE	FALSE	TRUE	FALSE	FALSE	FALSE	FALSE	FALSE	FALSE	FALSE
chr11	118607887	118608005	PHLDB1	314	0	1	0	FALSE	FALSE	FALSE	TRUE	TRUE	TRUE	FALSE	FALSE	FALSE	FALSE	FALSE	FALSE
chr11	118634866	118634983	PHLDB1	6075	0	1	0	FALSE	FALSE	FALSE	TRUE	FALSE	FALSE	FALSE	FALSE	FALSE	FALSE	FALSE	FALSE
chr11	118640876	118640994	MIR6716	-3064	0	1	0	TRUE	FALSE	FALSE	FALSE	FALSE	FALSE	FALSE	FALSE	FALSE	FALSE	FALSE	FALSE
chr11	118672985	118673103	TREH	6628	0	1	0	TRUE	FALSE	FALSE	FALSE	FALSE	FALSE	FALSE	FALSE	FALSE	FALSE	FALSE	FALSE
chr11	118789538	118790948	DDX6	705	1	0	0	FALSE	FALSE	FALSE	FALSE	TRUE	FALSE	FALSE	FALSE	FALSE	FALSE	FALSE	FALSE
chr11	118790848	118791248	DDX6	0	0	0	1	FALSE	FALSE	FALSE	TRUE	TRUE	TRUE	FALSE	FALSE	FALSE	TRUE	FALSE	FALSE
chr11	118998018	118998136	CCDC84	11	0	1	0	FALSE	FALSE	FALSE	TRUE	TRUE	TRUE	FALSE	FALSE	FALSE	TRUE	TRUE	FALSE
chr11	119018596	119018714	TRAPPC4	187	0	1	0	FALSE	FALSE	FALSE	TRUE	TRUE	TRUE	FALSE	FALSE	FALSE	TRUE	TRUE	FALSE
chr11	119030580	119030980	SLC37A4	0	0	0	1	FALSE	FALSE	FALSE	FALSE	TRUE	FALSE	FALSE	FALSE	FALSE	FALSE	FALSE	FALSE
chr11	119056828	119057228	HYOU1	0	0	0	1	FALSE	FALSE	FALSE	TRUE	TRUE	FALSE	FALSE	FALSE	FALSE	FALSE	FALSE	FALSE
chr11	119056835	119056953	HYOU1	45	0	1	0	TRUE	FALSE	FALSE	TRUE	TRUE	FALSE	FALSE	FALSE	FALSE	FALSE	FALSE	FALSE
chr11	119094944	119095062	H2AFX	464	0	1	0	FALSE	FALSE	FALSE	TRUE	TRUE	FALSE	FALSE	FALSE	FALSE	FALSE	FALSE	FALSE
chr11	119095164	119095564	H2AFX	0	0	0	1	FALSE	FALSE	FALSE	TRUE	TRUE	FALSE	FALSE	FALSE	FALSE	TRUE	FALSE	FALSE
chr11	119101054	119102075	DPAGT1	293	1	0	0	FALSE	FALSE	FALSE	TRUE	FALSE	FALSE	FALSE	FALSE	FALSE	TRUE	FALSE	FALSE
chr11	119107349	119108956	C2CD2L	40	1	0	0	TRUE	FALSE	FALSE	TRUE	FALSE	FALSE	FALSE	FALSE	FALSE	FALSE	FALSE	FALSE
chr11	119121491	119121891	HINFP	0	0	0	1	FALSE	FALSE	FALSE	FALSE	TRUE	FALSE	FALSE	FALSE	FALSE	FALSE	FALSE	FALSE
chr11	119121522	119122252	HINFP	279	1	0	0	FALSE	FALSE	FALSE	TRUE	TRUE	FALSE	FALSE	FALSE	FALSE	TRUE	TRUE	FALSE
chr11	119318802	119318920	MCAM	-1729	0	1	0	TRUE	FALSE	FALSE	FALSE	FALSE	FALSE	TRUE	FALSE	FALSE	FALSE	FALSE	FALSE
chr11	119332355	119332473	RNF26	-2085	0	1	0	TRUE	FALSE	FALSE	FALSE	FALSE	FALSE	FALSE	FALSE	FALSE	FALSE	FALSE	FALSE
chr11	119356409	119356527	USP2	7250	0	1	0	TRUE	FALSE	FALSE	FALSE	FALSE	FALSE	FALSE	FALSE	FALSE	FALSE	FALSE	FALSE
chr11	119370613	119370731	USP2	5684	0	1	0	TRUE	FALSE	FALSE	FALSE	FALSE	FALSE	FALSE	FALSE	FALSE	FALSE	FALSE	FALSE
chr11	120303198	120303316	LOC105369531	-11490	0	1	0	FALSE	FALSE	FALSE	FALSE	TRUE	FALSE	FALSE	FALSE	FALSE	FALSE	FALSE	FALSE
chr11	120511181	120511299	GRIK4	-505	0	1	0	TRUE	FALSE	FALSE	FALSE	FALSE	FALSE	FALSE	FALSE	FALSE	FALSE	FALSE	FALSE
chr11	120511745	120512431	GRIK4	343	1	0	0	TRUE	FALSE	FALSE	TRUE	FALSE	FALSE	FALSE	FALSE	FALSE	FALSE	FALSE	FALSE
chr11	12053324	12053442	LOC105376554	22509	0	1	0	TRUE	FALSE	FALSE	FALSE	FALSE	FALSE	FALSE	FALSE	FALSE	FALSE	FALSE	FALSE
chr11	12110491	12110891	MICAL2	0	0	0	1	TRUE	FALSE	TRUE	FALSE	FALSE	FALSE	FALSE	FALSE	FALSE	FALSE	FALSE	FALSE
chr11	12135387	12135728	MICAL2	-2832	1	0	0	TRUE	FALSE	FALSE	FALSE	FALSE	FALSE	FALSE	FALSE	FALSE	FALSE	FALSE	FALSE
chr11	12136900	12137389	MICAL2	-1245	1	0	0	FALSE	FALSE	TRUE	TRUE	FALSE	FALSE	FALSE	FALSE	FALSE	FALSE	FALSE	FALSE
chr11	121653078	121653196	SORL1	86413	0	1	0	TRUE	FALSE	FALSE	FALSE	FALSE	FALSE	FALSE	FALSE	FALSE	FALSE	FALSE	FALSE
chr11	1223729	1223940	MUC5B	770	1	0	0	FALSE	FALSE	TRUE	FALSE	FALSE	FALSE	FALSE	FALSE	FALSE	FALSE	FALSE	FALSE
chr11	1224109	1224889	MUC5B	1435	1	0	0	FALSE	FALSE	TRUE	FALSE	FALSE	FALSE	FALSE	FALSE	TRUE	FALSE	FALSE	FALSE
chr11	1225047	1225561	MUC5B	2240	1	0	0	FALSE	FALSE	TRUE	FALSE	FALSE	FALSE	FALSE	FALSE	FALSE	FALSE	FALSE	FALSE
chr11	122629089	122629207	UBASH3B	-26541	0	1	0	FALSE	TRUE	FALSE	FALSE	FALSE	FALSE	FALSE	FALSE	FALSE	FALSE	FALSE	FALSE
chr11	122655689	122657165	UBASH3B	738	0	1	0	FALSE	TRUE	FALSE	FALSE	FALSE	FALSE	FALSE	FALSE	FALSE	FALSE	FALSE	FALSE
chr11	12267104	12267222	MICALCL	-19736	0	1	0	FALSE	FALSE	FALSE	TRUE	FALSE	FALSE	FALSE	FALSE	FALSE	FALSE	FALSE	FALSE
chr11	122835960	122836078	CRTAM	-2399	0	1	0	TRUE	FALSE	FALSE	FALSE	FALSE	FALSE	FALSE	FALSE	FALSE	FALSE	FALSE	FALSE
chr11	122850106	122850224	CRTAM	11668	0	1	0	FALSE	FALSE	FALSE	TRUE	FALSE	FALSE	FALSE	FALSE	FALSE	FALSE	FALSE	FALSE
chr11	12288718	12288836	MICALCL	1878	0	1	0	FALSE	FALSE	FALSE	TRUE	TRUE	FALSE	FALSE	FALSE	FALSE	FALSE	FALSE	FALSE
chr11	123061381	123062335	HSPA8	477	0	1	0	TRUE	FALSE	FALSE	TRUE	FALSE	FALSE	FALSE	FALSE	FALSE	FALSE	FALSE	FALSE
chr11	12331416	12331534	MICALCL	44576	0	1	0	FALSE	FALSE	FALSE	TRUE	FALSE	FALSE	FALSE	FALSE	FALSE	FALSE	FALSE	FALSE
chr11	123511364	123511482	GRAMD1B	2361	0	1	0	TRUE	FALSE	FALSE	FALSE	FALSE	FALSE	FALSE	FALSE	FALSE	FALSE	FALSE	FALSE
chr11	123587245	123587363	GRAMD1B	-3327	0	1	0	FALSE	TRUE	FALSE	FALSE	FALSE	FALSE	FALSE	FALSE	FALSE	FALSE	FALSE	FALSE
chr11	124622776	124623176	TBRG1	0	0	0	1	FALSE	FALSE	FALSE	FALSE	TRUE	FALSE	FALSE	FALSE	FALSE	FALSE	FALSE	FALSE
chr11	124633501	124633619	TBRG1	9307	0	1	0	FALSE	FALSE	FALSE	TRUE	FALSE	FALSE	FALSE	FALSE	FALSE	FALSE	FALSE	FALSE
chr11	124745522	124747376	VSIG2	5764	1	0	0	TRUE	FALSE	FALSE	FALSE	TRUE	FALSE	TRUE	FALSE	FALSE	FALSE	FALSE	FALSE
chr11	124863502	124863620	ROBO3	-1847	0	1	0	TRUE	FALSE	FALSE	FALSE	FALSE	FALSE	FALSE	FALSE	FALSE	FALSE	FALSE	FALSE
chr11	124876358	124876476	ROBO3	7710	0	1	0	TRUE	FALSE	FALSE	FALSE	FALSE	FALSE	FALSE	FALSE	FALSE	FALSE	FALSE	FALSE
chr11	125918622	125918740	DDX25	14021	0	1	0	FALSE	FALSE	FALSE	TRUE	FALSE	FALSE	FALSE	FALSE	FALSE	FALSE	FALSE	FALSE
chr11	126268908	126269026	SRPRA	15	0	1	0	FALSE	FALSE	FALSE	TRUE	TRUE	FALSE	FALSE	FALSE	FALSE	TRUE	TRUE	FALSE
chr11	126269050	126269450	FOXRED1	0	0	0	1	FALSE	FALSE	FALSE	FALSE	TRUE	FALSE	FALSE	FALSE	FALSE	FALSE	TRUE	FALSE
chr11	126303961	126304361	DCPS	0	0	0	1	FALSE	FALSE	FALSE	TRUE	FALSE	FALSE	FALSE	FALSE	FALSE	TRUE	FALSE	FALSE
chr11	126310609	126310727	DCPS	6625	0	1	0	FALSE	FALSE	TRUE	FALSE	FALSE	FALSE	FALSE	FALSE	FALSE	FALSE	FALSE	FALSE
chr11	12674319	12674719	TEAD1	0	0	0	1	FALSE	FALSE	FALSE	TRUE	FALSE	FALSE	FALSE	FALSE	FALSE	FALSE	FALSE	FALSE
chr11	126990497	126990615	LOC105369558	75	0	1	0	TRUE	FALSE	FALSE	FALSE	FALSE	FALSE	FALSE	FALSE	FALSE	FALSE	FALSE	FALSE
chr11	127003651	127003769	KIRREL3	-250	0	1	0	TRUE	FALSE	FALSE	TRUE	TRUE	FALSE	FALSE	FALSE	FALSE	FALSE	FALSE	FALSE
chr11	128831294	128831412	KCNJ1	11181	0	1	0	TRUE	FALSE	FALSE	FALSE	FALSE	FALSE	FALSE	FALSE	FALSE	FALSE	FALSE	FALSE
chr11	128848956	128849074	LOC107984409	-5057	0	1	0	TRUE	FALSE	FALSE	FALSE	FALSE	FALSE	FALSE	FALSE	FALSE	FALSE	FALSE	FALSE
chr11	128904623	128905697	C11orf45	537	1	0	0	FALSE	FALSE	FALSE	TRUE	FALSE	FALSE	FALSE	FALSE	FALSE	FALSE	FALSE	FALSE
chr11	12964186	12964304	LINC00958	25303	0	1	0	FALSE	FALSE	TRUE	FALSE	FALSE	FALSE	FALSE	FALSE	FALSE	FALSE	FALSE	FALSE
chr11	129895264	129895664	NFRKB	0	0	0	1	FALSE	FALSE	TRUE	TRUE	TRUE	FALSE	FALSE	FALSE	FALSE	FALSE	FALSE	FALSE
chr11	130002623	130002835	LINC00167	106	1	0	0	FALSE	FALSE	FALSE	FALSE	TRUE	FALSE	FALSE	FALSE	FALSE	FALSE	FALSE	FALSE
chr11	13009422	13011354	RASSF10	966	1	0	0	TRUE	FALSE	FALSE	FALSE	TRUE	FALSE	FALSE	FALSE	FALSE	FALSE	FALSE	FALSE
chr11	130135692	130135810	ST14	-24035	0	1	0	TRUE	FALSE	FALSE	FALSE	FALSE	FALSE	FALSE	FALSE	FALSE	FALSE	FALSE	FALSE
chr11	13140698	13141325	LOC105376558	-28030	1	0	0	FALSE	FALSE	FALSE	TRUE	FALSE	FALSE	FALSE	FALSE	FALSE	FALSE	FALSE	FALSE
chr11	132402194	132402312	NTM-IT	117952	0	1	0	TRUE	FALSE	FALSE	FALSE	FALSE	FALSE	FALSE	FALSE	FALSE	FALSE	FALSE	FALSE
chr11	133058664	133058782	LOC105369580	86202	0	1	0	TRUE	FALSE	FALSE	FALSE	FALSE	FALSE	FALSE	FALSE	FALSE	FALSE	FALSE	FALSE
chr11	133070951	133071069	LOC105369580	98489	0	1	0	FALSE	FALSE	TRUE	FALSE	FALSE	FALSE	FALSE	FALSE	FALSE	FALSE	FALSE	FALSE
chr11	133078698	133078816	LOC105369580	106236	0	1	0	TRUE	FALSE	FALSE	FALSE	FALSE	FALSE	FALSE	FALSE	FALSE	FALSE	FALSE	FALSE
chr11	1335936	1336693	LOC105376513	-13992	1	0	0	TRUE	FALSE	FALSE	FALSE	FALSE	FALSE	FALSE	FALSE	FALSE	FALSE	FALSE	FALSE
chr11	133928517	133928635	IGSF9B	2552	0	1	0	TRUE	FALSE	TRUE	FALSE	FALSE	FALSE	FALSE	FALSE	FALSE	FALSE	FALSE	FALSE
chr11	134223661	134224061	NCAPD3	0	0	0	1	FALSE	FALSE	FALSE	TRUE	TRUE	TRUE	FALSE	FALSE	FALSE	TRUE	TRUE	FALSE
chr11	134224237	134224355	NCAPD3	236	0	1	0	FALSE	FALSE	FALSE	TRUE	TRUE	TRUE	FALSE	FALSE	FALSE	TRUE	TRUE	FALSE
chr11	134224568	134224968	VPS26B	0	0	0	1	FALSE	FALSE	FALSE	TRUE	TRUE	TRUE	FALSE	FALSE	FALSE	FALSE	FALSE	FALSE
chr11	134253041	134253441	THYN1	0	0	0	1	FALSE	FALSE	FALSE	TRUE	FALSE	FALSE	FALSE	FALSE	FALSE	FALSE	FALSE	FALSE
chr11	134253461	134253861	ACAD8	0	0	0	1	FALSE	FALSE	FALSE	TRUE	FALSE	FALSE	FALSE	FALSE	FALSE	FALSE	FALSE	FALSE
chr11	14253494	14253612	RRAS2	71698	0	1	0	FALSE	FALSE	FALSE	TRUE	FALSE	FALSE	FALSE	FALSE	FALSE	FALSE	FALSE	FALSE
chr11	14254613	14254956	RRAS2	70467	0	1	0	TRUE	FALSE	FALSE	FALSE	FALSE	FALSE	FALSE	FALSE	FALSE	FALSE	FALSE	FALSE
chr11	14520068	14520468	PSMA1	0	0	0	1	FALSE	FALSE	FALSE	TRUE	TRUE	TRUE	FALSE	FALSE	FALSE	FALSE	FALSE	FALSE
chr11	14520433	14520551	PSMA1	-47	0	1	0	FALSE	FALSE	FALSE	TRUE	TRUE	TRUE	FALSE	FALSE	FALSE	TRUE	TRUE	TRUE
chr11	1483907	1484025	MOB2	2813	0	1	0	TRUE	FALSE	FALSE	TRUE	FALSE	FALSE	FALSE	FALSE	FALSE	FALSE	FALSE	FALSE
chr11	1541529	1541647	LOC101927562	14869	0	1	0	TRUE	FALSE	TRUE	FALSE	FALSE	FALSE	FALSE	FALSE	FALSE	FALSE	FALSE	FALSE
chr11	1542464	1542582	LOC101927562	13934	0	1	0	TRUE	FALSE	FALSE	FALSE	FALSE	FALSE	FALSE	FALSE	FALSE	FALSE	FALSE	FALSE
chr11	15622186	15622594	LOC105376568	1288	1	0	0	TRUE	FALSE	FALSE	FALSE	FALSE	FALSE	FALSE	FALSE	FALSE	FALSE	FALSE	FALSE
chr11	1571979	1572379	DUSP8	0	0	0	1	TRUE	FALSE	FALSE	FALSE	FALSE	FALSE	FALSE	FALSE	FALSE	FALSE	FALSE	FALSE
chr11	15756007	15756216	LOC105376567	12365	1	0	0	FALSE	FALSE	TRUE	FALSE	FALSE	FALSE	FALSE	FALSE	FALSE	FALSE	FALSE	FALSE
chr11	1595582	1595700	KRTAP5-2	2653	0	1	0	TRUE	FALSE	FALSE	FALSE	FALSE	FALSE	FALSE	FALSE	FALSE	FALSE	FALSE	FALSE
chr11	16738600	16739765	C11orf58	582	1	0	0	FALSE	FALSE	FALSE	TRUE	FALSE	FALSE	FALSE	FALSE	FALSE	TRUE	FALSE	FALSE
chr11	16785642	16785760	LOC283278	781	0	1	0	TRUE	FALSE	FALSE	FALSE	FALSE	FALSE	FALSE	FALSE	FALSE	FALSE	FALSE	FALSE
chr11	16820405	16820523	LOC283278	-33272	0	1	0	TRUE	FALSE	FALSE	FALSE	FALSE	FALSE	FALSE	FALSE	FALSE	FALSE	FALSE	FALSE
chr11	1693230	1694592	KRTAP5-6	-3283	1	0	0	FALSE	FALSE	FALSE	TRUE	FALSE	FALSE	FALSE	FALSE	FALSE	FALSE	FALSE	FALSE
chr11	17063538	17063829	SNORD14A	11061	0	1	0	TRUE	FALSE	FALSE	FALSE	FALSE	FALSE	FALSE	FALSE	FALSE	FALSE	FALSE	FALSE
chr11	17276672	17277072	NUCB2	0	0	0	1	FALSE	FALSE	FALSE	TRUE	FALSE	FALSE	FALSE	FALSE	FALSE	FALSE	FALSE	FALSE
chr11	1746604	1746983	IFITM10	3801	1	0	0	TRUE	FALSE	FALSE	FALSE	FALSE	FALSE	FALSE	FALSE	FALSE	FALSE	FALSE	FALSE
chr11	1747784	1748737	IFITM10	2334	1	0	0	TRUE	TRUE	FALSE	FALSE	TRUE	TRUE	FALSE	FALSE	FALSE	FALSE	FALSE	FALSE
chr11	1748821	1749687	IFITM10	1340	1	0	0	TRUE	FALSE	FALSE	FALSE	TRUE	FALSE	FALSE	FALSE	FALSE	FALSE	FALSE	FALSE
chr11	1751594	1751843	IFITM10	-1124	1	0	0	TRUE	FALSE	FALSE	FALSE	FALSE	FALSE	FALSE	FALSE	FALSE	FALSE	FALSE	FALSE
chr11	1751992	1752559	IFITM10	-1681	1	0	0	TRUE	FALSE	FALSE	FALSE	FALSE	FALSE	FALSE	FALSE	FALSE	FALSE	FALSE	FALSE
chr11	17554440	17554558	OTOG	7127	0	1	0	TRUE	FALSE	FALSE	FALSE	FALSE	FALSE	FALSE	FALSE	FALSE	FALSE	FALSE	FALSE
chr11	1755588	1756614	IFITM10	-5507	1	0	0	FALSE	FALSE	FALSE	TRUE	FALSE	FALSE	FALSE	FALSE	FALSE	FALSE	FALSE	FALSE
chr11	1756956	1757343	IFITM10	-6555	1	0	0	TRUE	FALSE	FALSE	FALSE	FALSE	FALSE	FALSE	FALSE	FALSE	FALSE	FALSE	FALSE
chr11	1757359	1757595	CTSD	6515	1	0	0	TRUE	FALSE	FALSE	FALSE	FALSE	FALSE	FALSE	FALSE	FALSE	FALSE	FALSE	FALSE
chr11	1757657	1758659	CTSD	5834	1	0	0	TRUE	FALSE	FALSE	FALSE	FALSE	FALSE	FALSE	FALSE	FALSE	FALSE	FALSE	FALSE
chr11	1763406	1763992	CTSD	293	1	0	0	FALSE	TRUE	FALSE	FALSE	FALSE	FALSE	FALSE	FALSE	FALSE	FALSE	FALSE	FALSE
chr11	17686235	17686425	LOC102723330	10609	1	0	0	FALSE	FALSE	FALSE	TRUE	TRUE	FALSE	FALSE	FALSE	FALSE	FALSE	FALSE	FALSE
chr11	1780807	1781865	LOC105376517	-2948	1	0	0	FALSE	FALSE	FALSE	TRUE	TRUE	TRUE	FALSE	FALSE	FALSE	FALSE	FALSE	FALSE
chr11	1782020	1782509	LOC105376517	-3876	1	0	0	FALSE	FALSE	FALSE	TRUE	FALSE	FALSE	FALSE	FALSE	FALSE	FALSE	FALSE	FALSE
chr11	1784199	1784423	LOC105376517	-5923	1	0	0	FALSE	FALSE	TRUE	TRUE	FALSE	FALSE	FALSE	FALSE	FALSE	FALSE	FALSE	FALSE
chr11	1784797	1785017	LOC105376517	-6519	1	0	0	FALSE	FALSE	TRUE	TRUE	FALSE	FALSE	FALSE	FALSE	FALSE	FALSE	FALSE	FALSE
chr11	18014018	18014136	SERGEF	-915	0	1	0	FALSE	FALSE	FALSE	TRUE	TRUE	FALSE	FALSE	FALSE	FALSE	FALSE	FALSE	FALSE
chr11	18105266	18105404	SAAL1	756	1	0	0	TRUE	FALSE	FALSE	FALSE	FALSE	FALSE	FALSE	FALSE	FALSE	FALSE	FALSE	FALSE
chr11	18105553	18106091	SAAL1	269	1	0	0	TRUE	FALSE	FALSE	FALSE	FALSE	FALSE	FALSE	FALSE	FALSE	FALSE	FALSE	FALSE
chr11	1829019	1829405	SYT8	671	1	0	0	FALSE	TRUE	TRUE	FALSE	FALSE	FALSE	FALSE	FALSE	FALSE	FALSE	FALSE	FALSE
chr11	1830170	1831177	SYT8	-413	1	0	0	TRUE	FALSE	FALSE	FALSE	FALSE	FALSE	FALSE	FALSE	FALSE	FALSE	FALSE	FALSE
chr11	1837244	1838002	TNNI2	-1379	1	0	0	TRUE	FALSE	FALSE	FALSE	FALSE	FALSE	FALSE	FALSE	FALSE	FALSE	FALSE	FALSE
chr11	18394388	18395265	LDHA	438	1	0	0	FALSE	FALSE	FALSE	FALSE	TRUE	FALSE	FALSE	FALSE	FALSE	FALSE	FALSE	FALSE
chr11	1842503	1842933	LOC107984299	-228	1	0	0	FALSE	FALSE	FALSE	TRUE	FALSE	FALSE	FALSE	FALSE	FALSE	TRUE	FALSE	FALSE
chr11	1843168	1843322	LOC107984299	299	1	0	0	FALSE	FALSE	FALSE	TRUE	FALSE	FALSE	FALSE	FALSE	FALSE	TRUE	FALSE	FALSE
chr11	18802774	18802892	PTPN5	-10112	0	1	0	FALSE	FALSE	FALSE	FALSE	TRUE	FALSE	FALSE	FALSE	FALSE	FALSE	FALSE	FALSE
chr11	19553871	19553989	MIR4486	-21379	0	1	0	TRUE	FALSE	FALSE	FALSE	FALSE	FALSE	FALSE	FALSE	FALSE	FALSE	FALSE	FALSE
chr11	19557804	19557922	MIR4486	-17446	0	1	0	TRUE	FALSE	FALSE	FALSE	FALSE	FALSE	FALSE	FALSE	FALSE	FALSE	FALSE	FALSE
chr11	20100808	20100986	LOC107984417	-22042	1	0	0	TRUE	FALSE	FALSE	FALSE	FALSE	FALSE	FALSE	FALSE	FALSE	FALSE	FALSE	FALSE
chr11	20367206	20367324	HTATIP2	3125	0	1	0	FALSE	FALSE	FALSE	TRUE	TRUE	TRUE	FALSE	FALSE	FALSE	FALSE	FALSE	FALSE
chr11	20648111	20648229	NELL1	-21380	0	1	0	FALSE	FALSE	TRUE	FALSE	FALSE	FALSE	FALSE	FALSE	FALSE	FALSE	FALSE	FALSE
chr11	207078	207478	BET1L	0	0	0	1	TRUE	TRUE	FALSE	FALSE	FALSE	FALSE	TRUE	FALSE	FALSE	FALSE	FALSE	FALSE
chr11	207604	208004	RIC8A	0	0	0	1	TRUE	TRUE	FALSE	FALSE	FALSE	FALSE	TRUE	FALSE	FALSE	FALSE	FALSE	FALSE
chr11	208894	209012	RIC8A	153	0	1	0	TRUE	FALSE	FALSE	TRUE	TRUE	FALSE	FALSE	FALSE	FALSE	FALSE	FALSE	FALSE
chr11	209335	209464	MIR6743	64	1	0	0	FALSE	FALSE	FALSE	TRUE	TRUE	FALSE	FALSE	FALSE	FALSE	FALSE	FALSE	FALSE
chr11	2144131	2144249	IGF2	-3066	0	1	0	FALSE	FALSE	FALSE	TRUE	FALSE	FALSE	FALSE	FALSE	FALSE	FALSE	FALSE	FALSE
chr11	2151551	2151669	IGF2	-2007	0	1	0	FALSE	FALSE	FALSE	TRUE	FALSE	TRUE	FALSE	FALSE	FALSE	FALSE	FALSE	FALSE
chr11	2152203	2152324	IGF2	-2660	1	0	0	TRUE	FALSE	FALSE	FALSE	FALSE	FALSE	FALSE	FALSE	FALSE	FALSE	FALSE	FALSE
chr11	2156579	2156697	INS	4571	0	1	0	TRUE	FALSE	FALSE	FALSE	FALSE	FALSE	FALSE	FALSE	FALSE	FALSE	FALSE	FALSE
chr11	2166228	2166346	INS	-5078	0	1	0	TRUE	FALSE	FALSE	FALSE	FALSE	FALSE	FALSE	FALSE	FALSE	FALSE	FALSE	FALSE
chr11	2173289	2173407	MIR4686	286	0	1	0	FALSE	FALSE	FALSE	TRUE	FALSE	FALSE	FALSE	FALSE	FALSE	FALSE	FALSE	FALSE
chr11	2256630	2257761	ASCL2	13757	1	0	0	TRUE	FALSE	FALSE	FALSE	FALSE	FALSE	FALSE	FALSE	FALSE	FALSE	FALSE	FALSE
chr11	22829802	22829920	SVIP	1	0	1	0	TRUE	FALSE	FALSE	FALSE	FALSE	FALSE	FALSE	FALSE	FALSE	FALSE	FALSE	FALSE
chr11	22860386	22860504	CCDC179	-19	0	1	0	TRUE	FALSE	TRUE	FALSE	FALSE	FALSE	FALSE	FALSE	FALSE	FALSE	FALSE	FALSE
chr11	2302936	2304197	TSPAN32	1420	1	0	0	TRUE	FALSE	FALSE	FALSE	FALSE	FALSE	FALSE	FALSE	FALSE	FALSE	FALSE	FALSE
chr11	2304521	2304721	TSPAN32	2475	1	0	0	TRUE	FALSE	FALSE	FALSE	FALSE	FALSE	FALSE	FALSE	FALSE	FALSE	FALSE	FALSE
chr11	237362	237810	SIRT3	-636	1	0	0	FALSE	FALSE	FALSE	TRUE	FALSE	FALSE	FALSE	FALSE	FALSE	FALSE	FALSE	FALSE
chr11	2377212	2377612	CD81	0	0	0	1	TRUE	FALSE	FALSE	FALSE	FALSE	FALSE	FALSE	FALSE	FALSE	FALSE	FALSE	FALSE
chr11	2383023	2383141	CD81	-1558	0	1	0	TRUE	FALSE	FALSE	FALSE	FALSE	FALSE	FALSE	FALSE	FALSE	FALSE	FALSE	FALSE
chr11	2383520	2383638	CD81	-1061	0	1	0	TRUE	FALSE	FALSE	FALSE	FALSE	FALSE	FALSE	FALSE	FALSE	FALSE	FALSE	FALSE
chr11	2394424	2394542	TSSC4	-5925	0	1	0	TRUE	FALSE	FALSE	FALSE	FALSE	FALSE	FALSE	FALSE	FALSE	FALSE	FALSE	FALSE
chr11	2414872	2414990	TRPM5	8114	0	1	0	FALSE	FALSE	FALSE	FALSE	TRUE	FALSE	FALSE	FALSE	FALSE	FALSE	FALSE	FALSE
chr11	2428326	2428444	TRPM5	-4961	0	1	0	FALSE	FALSE	TRUE	FALSE	FALSE	FALSE	FALSE	FALSE	FALSE	FALSE	FALSE	FALSE
chr11	2460025	2460143	KCNQ1	-1369	0	1	0	TRUE	FALSE	FALSE	FALSE	FALSE	FALSE	FALSE	FALSE	FALSE	FALSE	FALSE	FALSE
chr11	2526147	2526648	KCNQ1	64944	1	0	0	TRUE	FALSE	FALSE	FALSE	FALSE	FALSE	FALSE	FALSE	FALSE	FALSE	FALSE	FALSE
chr11	2526805	2527521	KCNQ1	65710	1	0	0	TRUE	FALSE	FALSE	FALSE	FALSE	FALSE	FALSE	FALSE	FALSE	FALSE	FALSE	FALSE
chr11	26276961	26277079	LOC105376599	10987	0	1	0	TRUE	FALSE	FALSE	FALSE	FALSE	FALSE	FALSE	FALSE	FALSE	FALSE	FALSE	FALSE
chr11	2699206	2699998	KCNQ1OT1	396	1	0	0	FALSE	FALSE	FALSE	TRUE	TRUE	FALSE	FALSE	FALSE	FALSE	FALSE	FALSE	FALSE
chr11	27471730	27472787	LOC105376671	528	1	0	0	FALSE	FALSE	TRUE	FALSE	FALSE	FALSE	FALSE	FALSE	FALSE	FALSE	FALSE	FALSE
chr11	27506532	27506650	LIN7C	188	0	1	0	TRUE	FALSE	FALSE	FALSE	FALSE	FALSE	FALSE	FALSE	FALSE	FALSE	FALSE	FALSE
chr11	2791415	2792288	KCNQ1-AS1	69718	1	0	0	TRUE	FALSE	FALSE	TRUE	TRUE	FALSE	FALSE	FALSE	FALSE	TRUE	FALSE	FALSE
chr11	2792402	2792631	KCNQ1-AS1	69053	1	0	0	TRUE	FALSE	FALSE	TRUE	TRUE	FALSE	FALSE	FALSE	FALSE	TRUE	FALSE	FALSE
chr11	2902984	2903102	SLC22A18	566	0	1	0	TRUE	FALSE	FALSE	FALSE	FALSE	FALSE	FALSE	FALSE	FALSE	FALSE	FALSE	FALSE
chr11	2903685	2903803	SLC22A18AS	201	0	1	0	TRUE	FALSE	FALSE	TRUE	FALSE	FALSE	FALSE	FALSE	FALSE	FALSE	FALSE	FALSE
chr11	2927956	2929420	PHLDA2	732	1	0	0	FALSE	FALSE	FALSE	TRUE	TRUE	TRUE	FALSE	FALSE	FALSE	FALSE	FALSE	FALSE
chr11	2930420	2931152	PHLDA2	-1366	0	1	0	FALSE	FALSE	FALSE	TRUE	FALSE	TRUE	FALSE	FALSE	FALSE	FALSE	FALSE	FALSE
chr11	2932912	2934038	PHLDA2	-4055	1	0	0	TRUE	FALSE	FALSE	FALSE	FALSE	FALSE	FALSE	FALSE	FALSE	FALSE	FALSE	FALSE
chr11	2943915	2944033	PHLDA2	-14554	0	1	0	TRUE	FALSE	FALSE	FALSE	FALSE	FALSE	TRUE	FALSE	FALSE	FALSE	FALSE	FALSE
chr11	30323202	30323320	ARL14EP	163	0	1	0	FALSE	FALSE	FALSE	TRUE	TRUE	TRUE	FALSE	FALSE	FALSE	FALSE	FALSE	FALSE
chr11	309204	309627	IFITM2	1309	1	0	0	TRUE	FALSE	FALSE	FALSE	FALSE	FALSE	FALSE	FALSE	FALSE	FALSE	FALSE	FALSE
chr11	3130516	3131072	OSBPL5	-10393	1	0	0	FALSE	TRUE	FALSE	FALSE	FALSE	FALSE	FALSE	FALSE	FALSE	FALSE	FALSE	FALSE
chr11	315665	315963	IFITM1	1824	1	0	0	FALSE	FALSE	FALSE	TRUE	TRUE	TRUE	FALSE	FALSE	FALSE	FALSE	FALSE	FALSE
chr11	316138	316562	IFITM1	2360	1	0	0	FALSE	FALSE	FALSE	TRUE	TRUE	TRUE	FALSE	FALSE	FALSE	FALSE	FALSE	FALSE
chr11	3163882	3164109	OSBPL5	428	1	0	0	TRUE	FALSE	FALSE	FALSE	FALSE	FALSE	FALSE	FALSE	FALSE	FALSE	FALSE	FALSE
chr11	3164135	3165352	OSBPL5	-320	1	0	0	TRUE	FALSE	FALSE	FALSE	FALSE	FALSE	TRUE	FALSE	FALSE	FALSE	FALSE	FALSE
chr11	32092296	32092501	RCN1	1468	1	0	0	TRUE	FALSE	FALSE	FALSE	FALSE	FALSE	FALSE	FALSE	FALSE	FALSE	FALSE	FALSE
chr11	32092681	32092923	RCN1	1872	1	0	0	TRUE	FALSE	FALSE	FALSE	FALSE	FALSE	FALSE	FALSE	FALSE	FALSE	FALSE	FALSE
chr11	32333349	32333467	WT1	97409	0	1	0	TRUE	FALSE	FALSE	FALSE	FALSE	FALSE	FALSE	FALSE	FALSE	FALSE	FALSE	FALSE
chr11	32583531	32583649	EIF3M	-176	0	1	0	FALSE	FALSE	FALSE	FALSE	FALSE	TRUE	FALSE	FALSE	FALSE	FALSE	FALSE	FALSE
chr11	32583734	32584134	EIF3M	0	0	0	1	FALSE	FALSE	FALSE	TRUE	TRUE	TRUE	FALSE	FALSE	FALSE	TRUE	TRUE	TRUE
chr11	32809354	32809472	CCDC73	-14755	0	1	0	FALSE	FALSE	TRUE	FALSE	FALSE	FALSE	FALSE	FALSE	FALSE	FALSE	FALSE	FALSE
chr11	32892446	32892564	QSER1	-320	0	1	0	FALSE	FALSE	FALSE	TRUE	TRUE	FALSE	FALSE	FALSE	FALSE	FALSE	FALSE	FALSE
chr11	32892716	32893116	QSER1	0	0	0	1	FALSE	FALSE	TRUE	FALSE	FALSE	FALSE	FALSE	FALSE	FALSE	FALSE	FALSE	FALSE
chr11	33257269	33257669	HIPK3	0	0	0	1	FALSE	TRUE	FALSE	FALSE	FALSE	FALSE	FALSE	FALSE	FALSE	FALSE	FALSE	FALSE
chr11	33258330	33259228	HIPK3	368	1	0	0	TRUE	FALSE	FALSE	FALSE	FALSE	FALSE	FALSE	FALSE	FALSE	FALSE	FALSE	FALSE
chr11	33736087	33736205	CD59	333	0	1	0	TRUE	FALSE	FALSE	FALSE	FALSE	FALSE	FALSE	FALSE	FALSE	FALSE	FALSE	FALSE
chr11	33774212	33774612	FBXO3	0	0	0	1	FALSE	FALSE	FALSE	TRUE	TRUE	FALSE	FALSE	FALSE	FALSE	FALSE	FALSE	FALSE
chr11	33857974	33858092	LMO2	11792	0	1	0	FALSE	FALSE	FALSE	FALSE	FALSE	TRUE	FALSE	FALSE	FALSE	FALSE	FALSE	FALSE
chr11	34051544	34051662	LOC101929918	4	0	1	0	FALSE	FALSE	FALSE	FALSE	TRUE	FALSE	FALSE	FALSE	FALSE	FALSE	FALSE	FALSE
chr11	34051682	34052976	CAPRIN1	69	1	0	0	FALSE	FALSE	FALSE	FALSE	TRUE	FALSE	FALSE	FALSE	FALSE	FALSE	FALSE	FALSE
chr11	34438924	34439780	CAT	428	1	0	0	TRUE	FALSE	FALSE	FALSE	FALSE	FALSE	FALSE	FALSE	FALSE	FALSE	FALSE	FALSE
chr11	35392351	35392469	SLC1A2	-11124	0	1	0	TRUE	FALSE	FALSE	FALSE	FALSE	FALSE	TRUE	FALSE	FALSE	FALSE	FALSE	FALSE
chr11	355119	356523	B4GALNT4	-13951	1	0	0	FALSE	FALSE	TRUE	FALSE	FALSE	FALSE	FALSE	FALSE	FALSE	FALSE	FALSE	FALSE
chr11	35958466	35958689	LDLRAD3	14597	1	0	0	FALSE	FALSE	FALSE	TRUE	FALSE	FALSE	FALSE	FALSE	FALSE	FALSE	FALSE	FALSE
chr11	35978347	35978610	MIR3973	-31619	1	0	0	TRUE	FALSE	FALSE	FALSE	FALSE	FALSE	FALSE	FALSE	FALSE	FALSE	FALSE	FALSE
chr11	36508774	36510404	TRAF6	724	0	1	0	FALSE	FALSE	TRUE	FALSE	FALSE	FALSE	FALSE	FALSE	TRUE	FALSE	FALSE	FALSE
chr11	3797388	3797506	PGAP2	-276	0	1	0	FALSE	FALSE	FALSE	TRUE	TRUE	TRUE	FALSE	FALSE	FALSE	FALSE	FALSE	FALSE
chr11	3824852	3824970	RHOG	5735	0	1	0	TRUE	FALSE	FALSE	FALSE	FALSE	FALSE	FALSE	FALSE	FALSE	FALSE	FALSE	FALSE
chr11	4187151	4187972	LOC100506082	410	1	0	0	FALSE	FALSE	FALSE	TRUE	FALSE	FALSE	FALSE	FALSE	FALSE	TRUE	FALSE	FALSE
chr11	43278775	43278893	HNRNPKP3	-9465	0	1	0	TRUE	FALSE	FALSE	FALSE	FALSE	FALSE	FALSE	FALSE	FALSE	FALSE	FALSE	FALSE
chr11	43311826	43311944	API5	-69	0	1	0	TRUE	FALSE	FALSE	FALSE	FALSE	FALSE	FALSE	FALSE	FALSE	FALSE	FALSE	FALSE
chr11	43311910	43312310	API5	0	0	0	1	FALSE	FALSE	FALSE	FALSE	TRUE	FALSE	FALSE	FALSE	FALSE	FALSE	TRUE	FALSE
chr11	43358884	43359902	TTC17	503	1	0	0	FALSE	FALSE	TRUE	FALSE	FALSE	FALSE	FALSE	FALSE	FALSE	FALSE	FALSE	FALSE
chr11	44037500	44037618	ACCSL	-10421	0	1	0	FALSE	FALSE	FALSE	TRUE	FALSE	FALSE	FALSE	FALSE	FALSE	FALSE	FALSE	FALSE
chr11	44094394	44094512	EXT2	-1095	0	1	0	FALSE	FALSE	FALSE	FALSE	FALSE	TRUE	FALSE	FALSE	FALSE	FALSE	FALSE	FALSE
chr11	44866064	44866182	TP53I11	74954	0	1	0	TRUE	FALSE	FALSE	FALSE	FALSE	FALSE	FALSE	FALSE	FALSE	FALSE	FALSE	FALSE
chr11	44899512	44899630	TP53I11	41506	0	1	0	TRUE	FALSE	FALSE	FALSE	FALSE	FALSE	FALSE	FALSE	FALSE	FALSE	FALSE	FALSE
chr11	44927212	44927330	TP53I11	13806	0	1	0	TRUE	FALSE	FALSE	FALSE	TRUE	FALSE	FALSE	FALSE	FALSE	FALSE	FALSE	FALSE
chr11	44936573	44936691	TP53I11	4445	0	1	0	TRUE	FALSE	FALSE	FALSE	TRUE	FALSE	FALSE	FALSE	FALSE	FALSE	FALSE	FALSE
chr11	44949174	44949292	TP53I11	764	0	1	0	TRUE	FALSE	FALSE	FALSE	FALSE	FALSE	FALSE	FALSE	FALSE	FALSE	FALSE	FALSE
chr11	44950552	44950952	TP53I11	0	0	0	1	TRUE	FALSE	FALSE	FALSE	FALSE	FALSE	FALSE	FALSE	FALSE	FALSE	FALSE	FALSE
chr11	450194	450594	PTDSS2	0	0	0	1	TRUE	FALSE	FALSE	FALSE	FALSE	FALSE	FALSE	FALSE	FALSE	FALSE	FALSE	FALSE
chr11	45042260	45042450	LOC105376650	34066	1	0	0	FALSE	FALSE	FALSE	FALSE	TRUE	FALSE	FALSE	FALSE	FALSE	FALSE	FALSE	FALSE
chr11	45378610	45378728	LOC399886	7273	0	1	0	FALSE	FALSE	FALSE	TRUE	FALSE	FALSE	FALSE	FALSE	FALSE	FALSE	FALSE	FALSE
chr11	45663712	45665656	CHST1	937	1	0	0	TRUE	FALSE	FALSE	TRUE	TRUE	TRUE	FALSE	FALSE	FALSE	TRUE	TRUE	TRUE
chr11	45847274	45847392	CRY2	-72	0	1	0	FALSE	FALSE	TRUE	FALSE	FALSE	FALSE	FALSE	FALSE	FALSE	FALSE	FALSE	FALSE
chr11	45872839	45872957	MAPK8IP1	-12597	0	1	0	FALSE	TRUE	FALSE	FALSE	FALSE	FALSE	FALSE	FALSE	FALSE	FALSE	FALSE	FALSE
chr11	45897916	45898034	MAPK8IP1	1496	0	1	0	TRUE	FALSE	FALSE	FALSE	FALSE	FALSE	TRUE	FALSE	FALSE	FALSE	FALSE	FALSE
chr11	45898385	45898503	MAPK8IP1	1965	0	1	0	TRUE	FALSE	FALSE	FALSE	FALSE	FALSE	TRUE	FALSE	FALSE	FALSE	FALSE	FALSE
chr11	46279639	46280116	CREB3L1	2217	1	0	0	FALSE	FALSE	FALSE	TRUE	FALSE	FALSE	FALSE	FALSE	FALSE	FALSE	FALSE	FALSE
chr11	46318357	46318475	DGKZ	-14488	0	1	0	TRUE	FALSE	FALSE	FALSE	FALSE	FALSE	FALSE	FALSE	FALSE	FALSE	FALSE	FALSE
chr11	46345226	46345344	DGKZ	14	0	1	0	TRUE	FALSE	FALSE	TRUE	FALSE	FALSE	FALSE	FALSE	FALSE	FALSE	FALSE	FALSE
chr11	46352245	46352363	DGKZ	4753	0	1	0	FALSE	FALSE	FALSE	TRUE	FALSE	FALSE	FALSE	FALSE	FALSE	FALSE	FALSE	FALSE
chr11	46379743	46379861	MDK	-981	0	1	0	FALSE	FALSE	FALSE	FALSE	TRUE	TRUE	FALSE	FALSE	FALSE	FALSE	FALSE	FALSE
chr11	46387901	46388019	CHRM4	-1352	0	1	0	TRUE	FALSE	FALSE	TRUE	FALSE	FALSE	FALSE	FALSE	FALSE	FALSE	FALSE	FALSE
chr11	46410132	46410250	CHRM4	-23583	0	1	0	TRUE	FALSE	FALSE	FALSE	FALSE	FALSE	FALSE	FALSE	FALSE	FALSE	FALSE	FALSE
chr11	46542126	46542244	AMBRA1	49179	0	1	0	FALSE	FALSE	TRUE	FALSE	FALSE	FALSE	FALSE	FALSE	FALSE	FALSE	FALSE	FALSE
chr11	47387888	47389425	SPI1	6984	1	0	0	TRUE	FALSE	FALSE	FALSE	FALSE	FALSE	FALSE	FALSE	FALSE	FALSE	FALSE	FALSE
chr11	47389579	47389836	SPI1	5933	1	0	0	TRUE	FALSE	FALSE	FALSE	FALSE	FALSE	FALSE	FALSE	FALSE	FALSE	FALSE	FALSE
chr11	47412281	47412399	SLC39A13	2750	0	1	0	TRUE	FALSE	FALSE	FALSE	FALSE	FALSE	FALSE	FALSE	FALSE	FALSE	FALSE	FALSE
chr11	47422634	47422752	PSMC3	3780	0	1	0	FALSE	FALSE	TRUE	FALSE	FALSE	FALSE	FALSE	FALSE	FALSE	FALSE	FALSE	FALSE
chr11	47425668	47426473	PSMC3	403	0	1	0	TRUE	FALSE	FALSE	FALSE	TRUE	FALSE	FALSE	FALSE	FALSE	FALSE	FALSE	FALSE
chr11	47460619	47460810	RAPSN	-11536	1	0	0	TRUE	FALSE	FALSE	FALSE	FALSE	FALSE	FALSE	FALSE	FALSE	FALSE	FALSE	FALSE
chr11	47552069	47553353	CELF1	420	0	1	0	FALSE	FALSE	FALSE	TRUE	FALSE	FALSE	FALSE	FALSE	FALSE	TRUE	FALSE	FALSE
chr11	47641698	47642654	MTCH2	419	1	0	0	FALSE	FALSE	FALSE	TRUE	FALSE	FALSE	FALSE	FALSE	FALSE	FALSE	FALSE	FALSE
chr11	47847578	47848629	NUP160	441	0	1	0	FALSE	FALSE	FALSE	TRUE	TRUE	FALSE	FALSE	FALSE	FALSE	FALSE	FALSE	FALSE
chr11	48172970	48173088	OR4B1	-43780	0	1	0	TRUE	FALSE	FALSE	FALSE	FALSE	FALSE	FALSE	FALSE	FALSE	FALSE	FALSE	FALSE
chr11	503066	503805	RNH1	1077	1	0	0	TRUE	FALSE	FALSE	TRUE	FALSE	FALSE	FALSE	FALSE	FALSE	FALSE	FALSE	FALSE
chr11	503946	504274	RNH1	402	1	0	0	TRUE	FALSE	FALSE	TRUE	FALSE	FALSE	FALSE	FALSE	FALSE	TRUE	FALSE	FALSE
chr11	504333	505162	RNH1	-200	0	1	0	TRUE	FALSE	FALSE	TRUE	FALSE	FALSE	FALSE	FALSE	FALSE	TRUE	FALSE	FALSE
chr11	506847	506965	RNH1	-85	0	1	0	FALSE	FALSE	FALSE	TRUE	FALSE	FALSE	FALSE	FALSE	FALSE	FALSE	FALSE	FALSE
chr11	518364	519276	LRRC56	-146	0	1	0	TRUE	FALSE	FALSE	FALSE	FALSE	FALSE	FALSE	FALSE	FALSE	FALSE	FALSE	FALSE
chr11	560190	560308	RASSF7	468	0	1	0	FALSE	FALSE	FALSE	TRUE	FALSE	FALSE	FALSE	FALSE	FALSE	FALSE	FALSE	FALSE
chr11	560715	560935	LMNTD2	-45	0	1	0	FALSE	FALSE	FALSE	TRUE	FALSE	FALSE	FALSE	FALSE	FALSE	FALSE	FALSE	FALSE
chr11	560902	561302	RASSF7	0	0	0	1	FALSE	FALSE	FALSE	TRUE	FALSE	FALSE	FALSE	FALSE	FALSE	FALSE	FALSE	FALSE
chr11	56841345	56841463	LOC101927120	-7073	0	1	0	TRUE	FALSE	FALSE	FALSE	FALSE	FALSE	FALSE	FALSE	FALSE	FALSE	FALSE	FALSE
chr11	57312548	57312666	TNKS1BP1	9745	0	1	0	TRUE	FALSE	FALSE	FALSE	FALSE	FALSE	FALSE	FALSE	FALSE	FALSE	FALSE	FALSE
chr11	57335575	57335975	SSRP1	0	0	0	1	FALSE	FALSE	FALSE	TRUE	TRUE	TRUE	FALSE	FALSE	FALSE	TRUE	TRUE	FALSE
chr11	57417383	57417635	SLC43A3	9578	1	0	0	TRUE	FALSE	FALSE	FALSE	FALSE	FALSE	FALSE	FALSE	FALSE	FALSE	FALSE	FALSE
chr11	57513989	57514885	SLC43A1	-390	1	0	0	FALSE	FALSE	FALSE	TRUE	FALSE	FALSE	FALSE	FALSE	FALSE	FALSE	FALSE	FALSE
chr11	57761726	57762126	CTNND1	0	0	0	1	TRUE	FALSE	FALSE	FALSE	FALSE	FALSE	FALSE	FALSE	FALSE	FALSE	FALSE	FALSE
chr11	57791167	57792690	CTNND1	30167	1	0	0	FALSE	FALSE	FALSE	FALSE	TRUE	FALSE	FALSE	FALSE	FALSE	FALSE	FALSE	FALSE
chr11	58579067	58579467	ZFP91-CNTF	0	0	0	1	FALSE	FALSE	FALSE	TRUE	FALSE	FALSE	FALSE	FALSE	FALSE	FALSE	FALSE	FALSE
chr11	58629676	58629794	CNTF	7063	0	1	0	TRUE	FALSE	FALSE	FALSE	FALSE	FALSE	FALSE	FALSE	FALSE	FALSE	FALSE	FALSE
chr11	59172338	59173786	DTX4	195	1	0	0	TRUE	FALSE	FALSE	TRUE	FALSE	FALSE	FALSE	FALSE	FALSE	FALSE	FALSE	FALSE
chr11	59173841	59174544	DTX4	1325	1	0	0	FALSE	FALSE	FALSE	TRUE	FALSE	FALSE	FALSE	FALSE	FALSE	FALSE	FALSE	FALSE
chr11	59265803	59266013	MPEG1	-52887	1	0	0	TRUE	FALSE	FALSE	FALSE	FALSE	FALSE	FALSE	FALSE	FALSE	FALSE	FALSE	FALSE
chr11	59266446	59267661	MPEG1	-54032	1	0	0	TRUE	FALSE	FALSE	TRUE	FALSE	FALSE	FALSE	FALSE	FALSE	TRUE	FALSE	FALSE
chr11	59273000	59274019	MPEG1	-60488	1	0	0	FALSE	FALSE	FALSE	TRUE	FALSE	FALSE	FALSE	FALSE	FALSE	FALSE	FALSE	FALSE
chr11	59615135	59615984	LOC101927226	-529	1	0	0	FALSE	FALSE	FALSE	TRUE	TRUE	TRUE	FALSE	FALSE	FALSE	TRUE	TRUE	FALSE
chr11	5992762	5992880	OR52L1	-5836	0	1	0	FALSE	TRUE	FALSE	FALSE	FALSE	FALSE	FALSE	FALSE	FALSE	FALSE	FALSE	FALSE
chr11	60397067	60397269	MS4A14	1155	1	0	0	TRUE	FALSE	FALSE	FALSE	FALSE	FALSE	FALSE	FALSE	FALSE	FALSE	FALSE	FALSE
chr11	60482543	60482733	MS4A12	-10104	1	0	0	TRUE	FALSE	FALSE	TRUE	FALSE	FALSE	FALSE	FALSE	FALSE	FALSE	FALSE	FALSE
chr11	60818712	60818830	LOC105369322	17516	0	1	0	TRUE	FALSE	FALSE	FALSE	FALSE	FALSE	FALSE	FALSE	FALSE	FALSE	FALSE	FALSE
chr11	60837222	60837431	LOC105369322	-1039	1	0	0	FALSE	FALSE	FALSE	TRUE	FALSE	FALSE	FALSE	FALSE	FALSE	FALSE	FALSE	FALSE
chr11	60867541	60867804	ZP1	131	1	0	0	FALSE	FALSE	FALSE	TRUE	FALSE	FALSE	FALSE	FALSE	FALSE	FALSE	FALSE	FALSE
chr11	60899476	60899594	PRPF19	7054	0	1	0	FALSE	FALSE	FALSE	TRUE	FALSE	FALSE	FALSE	FALSE	FALSE	FALSE	FALSE	FALSE
chr11	60906286	60906686	PRPF19	0	0	0	1	FALSE	FALSE	FALSE	TRUE	TRUE	TRUE	FALSE	FALSE	FALSE	TRUE	TRUE	FALSE
chr11	60951189	60951307	SLC15A3	537	0	1	0	FALSE	FALSE	FALSE	TRUE	FALSE	FALSE	FALSE	FALSE	FALSE	FALSE	FALSE	FALSE
chr11	61007304	61009169	LOC105369326	290	1	0	0	TRUE	FALSE	FALSE	TRUE	FALSE	FALSE	TRUE	FALSE	FALSE	TRUE	FALSE	FALSE
chr11	61129310	61130813	VPS37C	3187	1	0	0	TRUE	FALSE	FALSE	TRUE	FALSE	TRUE	FALSE	FALSE	FALSE	FALSE	FALSE	FALSE
chr11	61134397	61134555	VPS37C	-1228	1	0	0	FALSE	FALSE	FALSE	TRUE	TRUE	TRUE	FALSE	FALSE	FALSE	FALSE	FALSE	FALSE
chr11	61273162	61273826	VWCE	21510	1	0	0	TRUE	FALSE	FALSE	FALSE	FALSE	FALSE	FALSE	FALSE	FALSE	FALSE	FALSE	FALSE
chr11	61293811	61295316	VWCE	441	1	0	0	TRUE	FALSE	TRUE	FALSE	FALSE	FALSE	TRUE	FALSE	FALSE	FALSE	FALSE	FALSE
chr11	613701	614087	IRF7	595	1	0	0	TRUE	FALSE	FALSE	FALSE	FALSE	FALSE	FALSE	FALSE	FALSE	FALSE	FALSE	FALSE
chr11	61392392	61393606	TMEM216	607	1	0	0	FALSE	FALSE	FALSE	TRUE	FALSE	FALSE	FALSE	FALSE	FALSE	FALSE	FALSE	FALSE
chr11	614429	614946	IRF7	-198	1	0	0	TRUE	FALSE	FALSE	FALSE	FALSE	FALSE	FALSE	FALSE	FALSE	FALSE	FALSE	FALSE
chr11	615209	615728	IRF7	260	1	0	0	FALSE	TRUE	FALSE	FALSE	FALSE	FALSE	FALSE	FALSE	FALSE	FALSE	FALSE	FALSE
chr11	61619782	61619976	RPLP0P2	4844	1	0	0	TRUE	FALSE	FALSE	FALSE	FALSE	FALSE	FALSE	FALSE	FALSE	FALSE	FALSE	FALSE
chr11	61680305	61680705	DAGLA	0	0	0	1	FALSE	FALSE	TRUE	FALSE	FALSE	FALSE	FALSE	FALSE	FALSE	FALSE	FALSE	FALSE
chr11	61697007	61697572	DAGLA	16857	1	0	0	TRUE	FALSE	FALSE	FALSE	FALSE	FALSE	FALSE	FALSE	FALSE	FALSE	FALSE	FALSE
chr11	61698207	61698634	DAGLA	17988	1	0	0	TRUE	FALSE	FALSE	FALSE	FALSE	FALSE	TRUE	FALSE	FALSE	FALSE	FALSE	FALSE
chr11	61698639	61698938	DAGLA	18356	1	0	0	TRUE	FALSE	FALSE	FALSE	FALSE	FALSE	TRUE	FALSE	FALSE	FALSE	FALSE	FALSE
chr11	61728249	61728367	DAGLA	9529	0	1	0	TRUE	FALSE	FALSE	FALSE	FALSE	FALSE	FALSE	FALSE	FALSE	FALSE	FALSE	FALSE
chr11	61733548	61733666	DAGLA	14828	0	1	0	FALSE	FALSE	FALSE	TRUE	FALSE	FALSE	FALSE	FALSE	FALSE	FALSE	FALSE	FALSE
chr11	61734887	61735005	DAGLA	16167	0	1	0	TRUE	FALSE	FALSE	FALSE	FALSE	FALSE	FALSE	FALSE	FALSE	FALSE	FALSE	FALSE
chr11	61735719	61735837	MYRF	-16838	0	1	0	TRUE	FALSE	FALSE	FALSE	TRUE	FALSE	FALSE	FALSE	FALSE	FALSE	FALSE	FALSE
chr11	61764771	61764889	LOC100129473	-1398	0	1	0	FALSE	FALSE	FALSE	TRUE	TRUE	FALSE	FALSE	FALSE	FALSE	FALSE	FALSE	FALSE
chr11	61765832	61765950	LOC100129473	-337	0	1	0	FALSE	FALSE	TRUE	FALSE	FALSE	FALSE	FALSE	FALSE	FALSE	FALSE	FALSE	FALSE
chr11	61770268	61770386	LOC100129473	4099	0	1	0	TRUE	FALSE	FALSE	FALSE	FALSE	FALSE	FALSE	FALSE	FALSE	FALSE	FALSE	FALSE
chr11	61777096	61777923	LOC100129473	11281	1	0	0	FALSE	FALSE	TRUE	FALSE	FALSE	FALSE	FALSE	FALSE	FALSE	FALSE	FALSE	FALSE
chr11	61779303	61779421	LOC100129473	13134	0	1	0	TRUE	FALSE	FALSE	FALSE	FALSE	FALSE	FALSE	FALSE	FALSE	FALSE	FALSE	FALSE
chr11	61779828	61779946	MIR611	12674	0	1	0	TRUE	FALSE	FALSE	FALSE	FALSE	FALSE	FALSE	FALSE	FALSE	FALSE	FALSE	FALSE
chr11	61890428	61891545	FADS3	559	1	0	0	FALSE	FALSE	FALSE	TRUE	FALSE	FALSE	FALSE	FALSE	FALSE	FALSE	FALSE	FALSE
chr11	61973543	61974100	LOC399900	6024	1	0	0	FALSE	FALSE	FALSE	TRUE	FALSE	FALSE	FALSE	FALSE	FALSE	FALSE	FALSE	FALSE
chr11	62123977	62124095	INCENP	-14	0	1	0	FALSE	FALSE	FALSE	TRUE	TRUE	TRUE	FALSE	FALSE	FALSE	FALSE	FALSE	FALSE
chr11	62337301	62338220	ASRGL1	304	1	0	0	TRUE	FALSE	FALSE	FALSE	FALSE	FALSE	FALSE	FALSE	FALSE	FALSE	FALSE	FALSE
chr11	62393475	62393593	LOC107984335	7667	0	1	0	TRUE	FALSE	FALSE	FALSE	FALSE	FALSE	FALSE	FALSE	FALSE	FALSE	FALSE	FALSE
chr11	62394938	62395056	LOC107984335	6204	0	1	0	FALSE	FALSE	FALSE	FALSE	FALSE	TRUE	FALSE	FALSE	FALSE	FALSE	FALSE	FALSE
chr11	62574988	62575497	EEF1G	-1254	1	0	0	TRUE	FALSE	TRUE	FALSE	FALSE	FALSE	FALSE	FALSE	FALSE	FALSE	FALSE	FALSE
chr11	62600947	62601840	MTA2	-101	1	0	0	FALSE	FALSE	TRUE	FALSE	FALSE	FALSE	FALSE	FALSE	FALSE	FALSE	FALSE	FALSE
chr11	62612460	62612860	EML3	0	0	0	1	TRUE	FALSE	FALSE	FALSE	FALSE	FALSE	FALSE	FALSE	FALSE	FALSE	FALSE	FALSE
chr11	62761538	62762405	POLR2G	433	1	0	0	FALSE	FALSE	FALSE	TRUE	TRUE	TRUE	FALSE	FALSE	FALSE	TRUE	TRUE	TRUE
chr11	62884392	62884510	SLC3A2	2753	0	1	0	FALSE	FALSE	FALSE	FALSE	FALSE	TRUE	FALSE	FALSE	FALSE	FALSE	FALSE	FALSE
chr11	63761868	63764733	C11orf95	5341	1	0	0	TRUE	FALSE	FALSE	TRUE	TRUE	FALSE	TRUE	FALSE	FALSE	TRUE	FALSE	FALSE
chr11	63764762	63765102	C11orf95	3709	1	0	0	TRUE	FALSE	FALSE	TRUE	FALSE	FALSE	FALSE	FALSE	FALSE	FALSE	FALSE	FALSE
chr11	63766616	63766818	C11orf95	1924	1	0	0	FALSE	FALSE	TRUE	FALSE	FALSE	FALSE	FALSE	FALSE	FALSE	FALSE	FALSE	FALSE
chr11	63839018	63839418	MARK2	0	0	0	1	TRUE	FALSE	FALSE	FALSE	FALSE	FALSE	FALSE	FALSE	FALSE	FALSE	FALSE	FALSE
chr11	63840122	63840322	MARK2	1268	1	0	0	TRUE	FALSE	FALSE	FALSE	FALSE	FALSE	FALSE	FALSE	FALSE	FALSE	FALSE	FALSE
chr11	63871880	63873158	MARK2	-15995	1	0	0	TRUE	FALSE	FALSE	FALSE	FALSE	FALSE	FALSE	FALSE	FALSE	FALSE	FALSE	FALSE
chr11	63873480	63873712	MARK2	-14918	1	0	0	TRUE	FALSE	FALSE	FALSE	FALSE	FALSE	FALSE	FALSE	FALSE	FALSE	FALSE	FALSE
chr11	63974606	63975203	COX8A	298	1	0	0	FALSE	FALSE	FALSE	TRUE	FALSE	FALSE	FALSE	FALSE	FALSE	FALSE	FALSE	FALSE
chr11	63998500	64001521	LOC101927673	-344	1	0	0	FALSE	FALSE	FALSE	TRUE	TRUE	FALSE	FALSE	FALSE	FALSE	TRUE	FALSE	FALSE
chr11	64151244	64151359	MACROD1	14812	1	0	0	FALSE	FALSE	FALSE	FALSE	TRUE	FALSE	FALSE	FALSE	FALSE	FALSE	FALSE	FALSE
chr11	64165701	64166101	MACROD1	0	0	0	1	FALSE	FALSE	FALSE	TRUE	FALSE	FALSE	FALSE	FALSE	FALSE	FALSE	FALSE	FALSE
chr11	64186114	64187571	STIP1	728	0	1	0	TRUE	FALSE	FALSE	TRUE	TRUE	TRUE	TRUE	FALSE	FALSE	FALSE	FALSE	FALSE
chr11	64204099	64204217	FERMT3	-2506	0	1	0	FALSE	TRUE	FALSE	TRUE	FALSE	FALSE	FALSE	TRUE	FALSE	FALSE	FALSE	FALSE
chr11	64226250	64226368	NUDT22	36	0	1	0	TRUE	FALSE	FALSE	FALSE	FALSE	FALSE	FALSE	FALSE	FALSE	FALSE	FALSE	FALSE
chr11	64230431	64231293	DNAJC4	431	1	0	0	TRUE	FALSE	FALSE	TRUE	FALSE	FALSE	FALSE	FALSE	FALSE	FALSE	FALSE	FALSE
chr11	64268128	64268557	GPR137	-1994	1	0	0	TRUE	FALSE	FALSE	FALSE	FALSE	FALSE	FALSE	FALSE	FALSE	FALSE	FALSE	FALSE
chr11	64285657	64285775	GPR137	18	0	1	0	FALSE	FALSE	FALSE	TRUE	FALSE	FALSE	FALSE	FALSE	FALSE	FALSE	FALSE	FALSE
chr11	64292009	64293068	KCNK4	529	1	0	0	FALSE	FALSE	FALSE	TRUE	TRUE	FALSE	FALSE	FALSE	FALSE	FALSE	FALSE	FALSE
chr11	64305467	64305867	ESRRA	0	0	0	1	FALSE	FALSE	FALSE	FALSE	TRUE	FALSE	FALSE	FALSE	FALSE	FALSE	FALSE	FALSE
chr11	64306054	64306172	ESRRA	-113	0	1	0	FALSE	TRUE	FALSE	FALSE	FALSE	FALSE	FALSE	FALSE	FALSE	FALSE	FALSE	FALSE
chr11	64306226	64306614	ESRRA	-34	1	0	0	FALSE	TRUE	FALSE	FALSE	FALSE	FALSE	FALSE	FALSE	FALSE	FALSE	FALSE	FALSE
chr11	64313635	64313753	TRMT112	4390	0	1	0	TRUE	FALSE	FALSE	FALSE	FALSE	FALSE	FALSE	FALSE	FALSE	FALSE	FALSE	FALSE
chr11	64318892	64319010	PRDX5	835	0	1	0	FALSE	FALSE	FALSE	TRUE	FALSE	FALSE	FALSE	FALSE	FALSE	FALSE	FALSE	FALSE
chr11	64322974	64323092	PRDX5	4917	0	1	0	FALSE	FALSE	TRUE	FALSE	FALSE	FALSE	FALSE	FALSE	FALSE	FALSE	FALSE	FALSE
chr11	64347134	64347353	CCDC88B	-1509	1	0	0	TRUE	FALSE	FALSE	FALSE	FALSE	FALSE	FALSE	FALSE	FALSE	FALSE	FALSE	FALSE
chr11	64385339	64385457	LOC107984366	10759	0	1	0	FALSE	FALSE	TRUE	TRUE	FALSE	FALSE	FALSE	FALSE	FALSE	FALSE	FALSE	FALSE
chr11	64599254	64599490	SLC22A12	8166	1	0	0	FALSE	FALSE	TRUE	FALSE	FALSE	FALSE	FALSE	FALSE	FALSE	FALSE	FALSE	FALSE
chr11	64652889	64653216	NRXN2	8326	1	0	0	FALSE	FALSE	FALSE	TRUE	TRUE	FALSE	FALSE	FALSE	FALSE	FALSE	FALSE	FALSE
chr11	64742201	64744158	RASGRP2	-371	0	1	0	FALSE	FALSE	FALSE	TRUE	FALSE	FALSE	FALSE	FALSE	FALSE	FALSE	FALSE	FALSE
chr11	64778887	64779005	SF1	97	0	1	0	FALSE	FALSE	FALSE	TRUE	FALSE	FALSE	FALSE	FALSE	FALSE	FALSE	FALSE	FALSE
chr11	64787697	64787815	SF1	-8713	0	1	0	TRUE	FALSE	FALSE	FALSE	FALSE	FALSE	FALSE	FALSE	FALSE	FALSE	FALSE	FALSE
chr11	64809672	64810563	MEN1	446	1	0	0	TRUE	FALSE	FALSE	TRUE	TRUE	TRUE	FALSE	FALSE	FALSE	TRUE	FALSE	TRUE
chr11	64841938	64844020	CDC42BPG	1489	1	0	0	TRUE	FALSE	FALSE	TRUE	FALSE	FALSE	FALSE	FALSE	FALSE	FALSE	FALSE	FALSE
chr11	64844181	64844569	CDC42BPG	93	1	0	0	FALSE	FALSE	FALSE	TRUE	TRUE	FALSE	FALSE	FALSE	FALSE	TRUE	FALSE	FALSE
chr11	64844676	64844794	CDC42BPG	-50	0	1	0	FALSE	FALSE	FALSE	TRUE	TRUE	FALSE	FALSE	FALSE	FALSE	TRUE	FALSE	FALSE
chr11	64847081	64847631	CDC42BPG	-2671	0	1	0	FALSE	FALSE	TRUE	FALSE	FALSE	FALSE	FALSE	FALSE	FALSE	FALSE	FALSE	FALSE
chr11	64848653	64849187	CDC42BPG	-4235	0	1	0	TRUE	FALSE	FALSE	FALSE	FALSE	FALSE	FALSE	FALSE	FALSE	FALSE	FALSE	FALSE
chr11	64849259	64849949	CDC42BPG	-4919	1	0	0	TRUE	FALSE	FALSE	FALSE	FALSE	FALSE	FALSE	FALSE	FALSE	FALSE	FALSE	FALSE
chr11	64850912	64852364	CDC42BPG	-6953	0	1	0	TRUE	FALSE	FALSE	FALSE	FALSE	FALSE	FALSE	FALSE	FALSE	FALSE	FALSE	FALSE
chr11	64852991	64853453	CDC42BPG	-8537	1	0	0	TRUE	FALSE	FALSE	FALSE	FALSE	FALSE	FALSE	FALSE	FALSE	FALSE	FALSE	FALSE
chr11	64853700	64853968	CDC42BPG	-9149	1	0	0	TRUE	FALSE	FALSE	FALSE	FALSE	FALSE	FALSE	FALSE	FALSE	FALSE	FALSE	FALSE
chr11	64854699	64855575	CDC42BPG	-10452	1	0	0	TRUE	FALSE	FALSE	FALSE	FALSE	FALSE	FALSE	FALSE	FALSE	FALSE	FALSE	FALSE
chr11	64856283	64857131	CDC42BPG	-12022	0	1	0	FALSE	FALSE	FALSE	TRUE	FALSE	FALSE	FALSE	FALSE	FALSE	FALSE	FALSE	FALSE
chr11	64869954	64870072	EHD1	8755	0	1	0	TRUE	TRUE	FALSE	FALSE	FALSE	FALSE	FALSE	FALSE	FALSE	FALSE	FALSE	FALSE
chr11	64870782	64870900	EHD1	7927	0	1	0	FALSE	FALSE	TRUE	TRUE	FALSE	FALSE	FALSE	FALSE	FALSE	FALSE	FALSE	FALSE
chr11	64878321	64878721	EHD1	0	0	0	1	FALSE	FALSE	FALSE	TRUE	FALSE	FALSE	FALSE	FALSE	FALSE	FALSE	FALSE	FALSE
chr11	65014112	65014946	ARL2	417	1	0	0	FALSE	FALSE	FALSE	TRUE	TRUE	TRUE	FALSE	FALSE	FALSE	TRUE	TRUE	TRUE
chr11	65024585	65024813	SNX15	-2708	1	0	0	FALSE	FALSE	TRUE	TRUE	FALSE	FALSE	FALSE	FALSE	FALSE	FALSE	FALSE	FALSE
chr11	65083764	65084164	CDCA5	0	0	0	1	FALSE	FALSE	FALSE	TRUE	TRUE	FALSE	FALSE	FALSE	FALSE	FALSE	FALSE	FALSE
chr11	65133742	65134532	SYVN1	395	1	0	0	FALSE	FALSE	FALSE	TRUE	FALSE	TRUE	FALSE	FALSE	FALSE	TRUE	FALSE	FALSE
chr11	65134222	65134622	SYVN1	0	0	0	1	FALSE	FALSE	FALSE	TRUE	FALSE	FALSE	FALSE	FALSE	FALSE	FALSE	FALSE	FALSE
chr11	65165540	65166391	SPDYC	-4270	1	0	0	TRUE	FALSE	FALSE	FALSE	FALSE	FALSE	FALSE	FALSE	FALSE	FALSE	FALSE	FALSE
chr11	65211052	65211300	SLC22A20	-2663	1	0	0	FALSE	FALSE	FALSE	TRUE	FALSE	FALSE	FALSE	FALSE	FALSE	FALSE	FALSE	FALSE
chr11	65237045	65237246	SLC22A20	16629	1	0	0	FALSE	FALSE	FALSE	TRUE	FALSE	FALSE	FALSE	FALSE	FALSE	FALSE	FALSE	FALSE
chr11	65251734	65251925	POLA2	-10022	1	0	0	TRUE	FALSE	FALSE	FALSE	FALSE	FALSE	FALSE	FALSE	FALSE	FALSE	FALSE	FALSE
chr11	65307557	65307896	LOC105369344	6153	1	0	0	TRUE	FALSE	FALSE	FALSE	FALSE	FALSE	FALSE	FALSE	FALSE	FALSE	FALSE	FALSE
chr11	65307960	65309394	LOC105369344	5202	1	0	0	TRUE	FALSE	FALSE	FALSE	FALSE	FALSE	FALSE	FALSE	FALSE	FALSE	FALSE	FALSE
chr11	65314817	65316132	CDC42EP2	657	1	0	0	FALSE	FALSE	FALSE	TRUE	TRUE	FALSE	FALSE	FALSE	FALSE	TRUE	FALSE	FALSE
chr11	65377107	65377419	SLC25A45	4670	1	0	0	TRUE	FALSE	FALSE	FALSE	FALSE	FALSE	FALSE	FALSE	FALSE	FALSE	FALSE	FALSE
chr11	65377883	65378093	SLC25A45	3945	1	0	0	TRUE	FALSE	FALSE	FALSE	FALSE	FALSE	FALSE	FALSE	FALSE	FALSE	FALSE	FALSE
chr11	65378272	65378843	SLC25A45	3376	1	0	0	TRUE	FALSE	FALSE	FALSE	FALSE	FALSE	FALSE	FALSE	FALSE	FALSE	FALSE	FALSE
chr11	65379993	65380278	SLC25A45	1798	1	0	0	TRUE	FALSE	FALSE	TRUE	FALSE	FALSE	FALSE	FALSE	FALSE	TRUE	FALSE	FALSE
chr11	65380727	65381085	SLC25A45	1027	1	0	0	TRUE	FALSE	FALSE	FALSE	FALSE	FALSE	FALSE	FALSE	FALSE	FALSE	FALSE	FALSE
chr11	65381735	65382386	SLC25A45	-127	1	0	0	FALSE	FALSE	FALSE	FALSE	FALSE	TRUE	FALSE	FALSE	FALSE	FALSE	FALSE	FALSE
chr11	65422697	65423097	NEAT1	0	0	0	1	FALSE	FALSE	TRUE	FALSE	FALSE	FALSE	FALSE	FALSE	FALSE	FALSE	FALSE	FALSE
chr11	65444457	65444768	MIR612	155	1	0	0	FALSE	FALSE	FALSE	FALSE	TRUE	FALSE	FALSE	FALSE	FALSE	FALSE	FALSE	FALSE
chr11	65445161	65445432	MIR612	839	1	0	0	FALSE	FALSE	FALSE	FALSE	TRUE	FALSE	FALSE	FALSE	FALSE	FALSE	FALSE	FALSE
chr11	65445445	65447098	MIR612	1814	1	0	0	FALSE	FALSE	FALSE	FALSE	TRUE	FALSE	FALSE	FALSE	FALSE	FALSE	FALSE	FALSE
chr11	65476985	65478132	LOC105369346	13349	1	0	0	FALSE	FALSE	FALSE	TRUE	FALSE	FALSE	FALSE	FALSE	FALSE	FALSE	FALSE	FALSE
chr11	65497761	65498190	MALAT1	297	1	0	0	TRUE	FALSE	FALSE	FALSE	FALSE	FALSE	FALSE	FALSE	FALSE	FALSE	FALSE	FALSE
chr11	65498449	65499665	MALAT1	1379	1	0	0	TRUE	FALSE	FALSE	FALSE	FALSE	FALSE	TRUE	FALSE	FALSE	FALSE	FALSE	FALSE
chr11	65538781	65541306	SCYL1	14801	1	0	0	TRUE	FALSE	FALSE	FALSE	FALSE	FALSE	TRUE	FALSE	FALSE	FALSE	FALSE	FALSE
chr11	65558231	65558349	LTBP3	-62	0	1	0	TRUE	FALSE	FALSE	FALSE	FALSE	FALSE	FALSE	FALSE	FALSE	FALSE	FALSE	FALSE
chr11	65570139	65570257	SSSCA1-AS1	215	0	1	0	FALSE	FALSE	FALSE	FALSE	TRUE	FALSE	FALSE	FALSE	FALSE	FALSE	FALSE	FALSE
chr11	65574210	65574328	EHBP1L1	-1764	0	1	0	TRUE	FALSE	FALSE	TRUE	TRUE	FALSE	FALSE	FALSE	FALSE	FALSE	FALSE	FALSE
chr11	65611007	65611402	MAP3K11	3045	1	0	0	TRUE	FALSE	FALSE	FALSE	FALSE	FALSE	FALSE	FALSE	FALSE	FALSE	FALSE	FALSE
chr11	65611470	65611834	MAP3K11	2597	1	0	0	TRUE	FALSE	FALSE	FALSE	FALSE	FALSE	FALSE	FALSE	FALSE	FALSE	FALSE	FALSE
chr11	65638106	65639032	SIPA1	463	0	1	0	FALSE	FALSE	FALSE	TRUE	FALSE	FALSE	FALSE	FALSE	FALSE	FALSE	FALSE	FALSE
chr11	65646937	65647055	MIR4489	-2195	0	1	0	TRUE	FALSE	FALSE	FALSE	FALSE	FALSE	FALSE	FALSE	FALSE	FALSE	FALSE	FALSE
chr11	65712145	65712545	KAT5	0	0	0	1	FALSE	FALSE	FALSE	FALSE	FALSE	TRUE	FALSE	FALSE	FALSE	FALSE	FALSE	FALSE
chr11	65787033	65788679	OVOL1	-105	1	0	0	FALSE	FALSE	FALSE	TRUE	FALSE	FALSE	FALSE	FALSE	FALSE	FALSE	FALSE	FALSE
chr11	65851151	65851375	LOC107984339	-5807	1	0	0	TRUE	FALSE	FALSE	FALSE	FALSE	FALSE	FALSE	FALSE	FALSE	FALSE	FALSE	FALSE
chr11	65884625	65885152	FIBP	3625	1	0	0	FALSE	FALSE	TRUE	FALSE	FALSE	FALSE	FALSE	FALSE	FALSE	FALSE	FALSE	FALSE
chr11	65919329	65919729	DRAP1	0	0	0	1	FALSE	FALSE	FALSE	TRUE	TRUE	FALSE	FALSE	FALSE	FALSE	TRUE	FALSE	FALSE
chr11	65961632	65962032	SART1	0	0	0	1	FALSE	FALSE	FALSE	TRUE	TRUE	TRUE	FALSE	FALSE	FALSE	TRUE	FALSE	FALSE
chr11	66001848	66002248	EIF1AD	0	0	0	1	FALSE	FALSE	FALSE	TRUE	TRUE	TRUE	FALSE	FALSE	FALSE	FALSE	FALSE	FALSE
chr11	66002226	66002344	EIF1AD	-68	0	1	0	FALSE	FALSE	FALSE	TRUE	FALSE	FALSE	FALSE	FALSE	FALSE	FALSE	FALSE	FALSE
chr11	66002398	66002798	BANF1	0	0	0	1	FALSE	FALSE	FALSE	TRUE	TRUE	TRUE	FALSE	FALSE	FALSE	FALSE	FALSE	FALSE
chr11	66011990	66012379	CST6	194	1	0	0	TRUE	FALSE	FALSE	FALSE	FALSE	FALSE	FALSE	FALSE	FALSE	FALSE	FALSE	FALSE
chr11	66012385	66013925	CST6	1165	1	0	0	TRUE	FALSE	FALSE	TRUE	FALSE	FALSE	FALSE	FALSE	FALSE	FALSE	FALSE	FALSE
chr11	66052384	66052502	SF3B2	99	0	1	0	FALSE	FALSE	FALSE	TRUE	TRUE	TRUE	FALSE	FALSE	FALSE	TRUE	FALSE	FALSE
chr11	66257603	66258003	KLC2	0	0	0	1	FALSE	FALSE	TRUE	FALSE	FALSE	FALSE	FALSE	FALSE	FALSE	FALSE	FALSE	FALSE
chr11	66311798	66313794	CD248	4248	0	1	0	FALSE	FALSE	TRUE	TRUE	TRUE	FALSE	FALSE	FALSE	FALSE	FALSE	FALSE	FALSE
chr11	66331074	66331192	RIN1	5244	0	1	0	FALSE	FALSE	TRUE	FALSE	FALSE	FALSE	FALSE	FALSE	FALSE	FALSE	FALSE	FALSE
chr11	66334671	66334789	RIN1	1647	0	1	0	FALSE	FALSE	FALSE	TRUE	FALSE	FALSE	FALSE	FALSE	FALSE	FALSE	FALSE	FALSE
chr11	66338591	66338709	RIN1	-1415	0	1	0	TRUE	FALSE	FALSE	TRUE	FALSE	FALSE	FALSE	FALSE	FALSE	FALSE	FALSE	FALSE
chr11	66340779	66340897	RIN1	-3603	0	1	0	FALSE	FALSE	FALSE	TRUE	FALSE	FALSE	FALSE	FALSE	FALSE	FALSE	FALSE	FALSE
chr11	66364021	66364139	SLC29A2	5381	0	1	0	TRUE	FALSE	FALSE	TRUE	FALSE	FALSE	FALSE	FALSE	FALSE	FALSE	FALSE	FALSE
chr11	66371323	66371723	SLC29A2	0	0	0	1	FALSE	FALSE	FALSE	TRUE	FALSE	FALSE	FALSE	FALSE	FALSE	FALSE	FALSE	FALSE
chr11	66372136	66372254	SLC29A2	-21	0	1	0	FALSE	FALSE	FALSE	TRUE	FALSE	FALSE	FALSE	FALSE	FALSE	FALSE	FALSE	FALSE
chr11	66438157	66438848	MRPL11	346	1	0	0	FALSE	FALSE	FALSE	TRUE	TRUE	FALSE	FALSE	FALSE	FALSE	TRUE	TRUE	FALSE
chr11	66567594	66568576	CTSF	138	1	0	0	TRUE	FALSE	FALSE	FALSE	FALSE	FALSE	FALSE	FALSE	FALSE	FALSE	FALSE	FALSE
chr11	66638168	66638286	RBM4	-389	0	1	0	TRUE	FALSE	FALSE	FALSE	FALSE	FALSE	FALSE	FALSE	FALSE	FALSE	FALSE	FALSE
chr11	66743356	66743735	C11orf80	-1190	1	0	0	TRUE	FALSE	FALSE	FALSE	FALSE	FALSE	FALSE	FALSE	FALSE	FALSE	FALSE	FALSE
chr11	6683014	6683414	MRPL17	0	0	0	1	FALSE	FALSE	FALSE	TRUE	TRUE	TRUE	FALSE	FALSE	FALSE	FALSE	FALSE	FALSE
chr11	6683492	6683610	MRPL17	-150	0	1	0	FALSE	FALSE	FALSE	TRUE	TRUE	FALSE	FALSE	FALSE	FALSE	TRUE	TRUE	FALSE
chr11	66843337	66843737	RCE1	0	0	0	1	FALSE	FALSE	FALSE	TRUE	FALSE	FALSE	FALSE	FALSE	FALSE	FALSE	FALSE	FALSE
chr11	66855744	66856404	PC	46	1	0	0	FALSE	FALSE	FALSE	FALSE	TRUE	FALSE	FALSE	FALSE	FALSE	FALSE	FALSE	FALSE
chr11	66859292	66859410	LRFN4	1947	0	1	0	FALSE	FALSE	FALSE	TRUE	FALSE	FALSE	FALSE	FALSE	FALSE	FALSE	FALSE	FALSE
chr11	66985869	66986661	C11orf86	10983	1	0	0	FALSE	FALSE	TRUE	FALSE	FALSE	FALSE	FALSE	FALSE	FALSE	FALSE	FALSE	FALSE
chr11	67023013	67023413	SYT12	0	0	0	1	TRUE	TRUE	TRUE	FALSE	FALSE	FALSE	FALSE	FALSE	FALSE	FALSE	FALSE	FALSE
chr11	67027507	67028482	SYT12	4629	1	0	0	TRUE	FALSE	FALSE	FALSE	FALSE	FALSE	FALSE	FALSE	FALSE	FALSE	FALSE	FALSE
chr11	67044733	67044851	MIR6860	-850	0	1	0	FALSE	FALSE	TRUE	FALSE	FALSE	FALSE	FALSE	FALSE	FALSE	FALSE	FALSE	FALSE
chr11	67053859	67055817	RHOD	-1979	0	1	0	TRUE	FALSE	FALSE	FALSE	FALSE	FALSE	FALSE	FALSE	FALSE	FALSE	FALSE	FALSE
chr11	67056752	67057152	RHOD	0	0	0	1	FALSE	TRUE	FALSE	FALSE	FALSE	FALSE	FALSE	FALSE	FALSE	FALSE	FALSE	FALSE
chr11	67255386	67255608	GRK2	-10922	1	0	0	TRUE	FALSE	TRUE	FALSE	FALSE	FALSE	FALSE	FALSE	FALSE	FALSE	FALSE	FALSE
chr11	67255971	67256098	GRK2	-10385	1	0	0	TRUE	FALSE	TRUE	FALSE	FALSE	FALSE	FALSE	FALSE	FALSE	FALSE	FALSE	FALSE
chr11	67261232	67262230	GRK2	-4688	1	0	0	TRUE	FALSE	FALSE	FALSE	FALSE	FALSE	FALSE	FALSE	FALSE	FALSE	FALSE	FALSE
chr11	67345214	67346053	POLD4	7963	1	0	0	TRUE	FALSE	FALSE	FALSE	FALSE	FALSE	FALSE	FALSE	FALSE	FALSE	FALSE	FALSE
chr11	67351187	67351649	POLD4	2178	1	0	0	TRUE	FALSE	FALSE	FALSE	TRUE	FALSE	FALSE	FALSE	FALSE	FALSE	FALSE	FALSE
chr11	67352770	67353596	POLD4	413	1	0	0	FALSE	FALSE	FALSE	TRUE	FALSE	FALSE	FALSE	FALSE	FALSE	FALSE	FALSE	FALSE
chr11	67379129	67380081	CLCF1	-5428	1	0	0	FALSE	FALSE	TRUE	TRUE	FALSE	FALSE	FALSE	FALSE	FALSE	FALSE	FALSE	FALSE
chr11	67428463	67429544	RPS6KB2	495	1	0	0	FALSE	FALSE	FALSE	TRUE	FALSE	FALSE	FALSE	FALSE	FALSE	FALSE	FALSE	FALSE
chr11	67492836	67492954	MIR6752	2651	0	1	0	TRUE	FALSE	FALSE	FALSE	FALSE	FALSE	FALSE	FALSE	FALSE	FALSE	FALSE	FALSE
chr11	67504039	67505372	PITPNM1	333	1	0	0	FALSE	FALSE	FALSE	TRUE	FALSE	FALSE	FALSE	FALSE	FALSE	FALSE	FALSE	FALSE
chr11	67506234	67506352	PITPNM1	-902	0	1	0	TRUE	FALSE	FALSE	FALSE	FALSE	FALSE	FALSE	FALSE	FALSE	FALSE	FALSE	FALSE
chr11	67508523	67508641	CDK2AP2	146	0	1	0	FALSE	FALSE	FALSE	TRUE	TRUE	TRUE	FALSE	FALSE	FALSE	TRUE	FALSE	FALSE
chr11	67576861	67576979	GSTP1	-6674	0	1	0	TRUE	FALSE	FALSE	FALSE	FALSE	FALSE	FALSE	FALSE	FALSE	FALSE	FALSE	FALSE
chr11	67605411	67605529	C11orf72	1236	0	1	0	FALSE	FALSE	TRUE	FALSE	FALSE	FALSE	FALSE	FALSE	FALSE	FALSE	FALSE	FALSE
chr11	67606866	67606984	NDUFV1	74	0	1	0	FALSE	FALSE	FALSE	TRUE	TRUE	FALSE	FALSE	FALSE	FALSE	FALSE	FALSE	FALSE
chr11	67613724	67614864	DOC2GP	1370	0	1	0	FALSE	FALSE	TRUE	TRUE	FALSE	FALSE	FALSE	FALSE	FALSE	FALSE	FALSE	FALSE
chr11	67627716	67629937	NUDT8	1111	0	1	0	TRUE	FALSE	FALSE	FALSE	FALSE	FALSE	FALSE	FALSE	FALSE	FALSE	FALSE	FALSE
chr11	67629622	67630022	NUDT8	0	0	0	1	TRUE	FALSE	FALSE	FALSE	FALSE	FALSE	FALSE	FALSE	FALSE	FALSE	FALSE	FALSE
chr11	67634408	67634526	TBX10	362	0	1	0	FALSE	FALSE	FALSE	TRUE	FALSE	FALSE	FALSE	FALSE	FALSE	FALSE	FALSE	FALSE
chr11	67650093	67650659	ACY3	283	1	0	0	TRUE	FALSE	FALSE	FALSE	FALSE	FALSE	FALSE	FALSE	FALSE	FALSE	FALSE	FALSE
chr11	67996605	67996723	UNC93B1	6440	0	1	0	TRUE	FALSE	FALSE	FALSE	FALSE	FALSE	FALSE	FALSE	FALSE	FALSE	FALSE	FALSE
chr11	68002515	68004223	UNC93B1	-265	0	1	0	FALSE	FALSE	TRUE	FALSE	FALSE	FALSE	FALSE	FALSE	TRUE	FALSE	FALSE	FALSE
chr11	68013138	68013719	ALDH3B1	3124	1	0	0	TRUE	FALSE	FALSE	FALSE	FALSE	FALSE	FALSE	FALSE	FALSE	FALSE	FALSE	FALSE
chr11	68014169	68015049	ALDH3B1	4305	0	1	0	FALSE	FALSE	TRUE	FALSE	FALSE	FALSE	FALSE	FALSE	FALSE	FALSE	FALSE	FALSE
chr11	68030582	68030982	NDUFS8	0	0	0	1	FALSE	FALSE	FALSE	TRUE	TRUE	FALSE	FALSE	FALSE	FALSE	FALSE	FALSE	FALSE
chr11	68127737	68129163	LOC105369362	-733	1	0	0	FALSE	FALSE	FALSE	TRUE	TRUE	FALSE	FALSE	FALSE	FALSE	FALSE	FALSE	FALSE
chr11	68212323	68213317	KMT5B	476	1	0	0	TRUE	FALSE	FALSE	TRUE	FALSE	FALSE	FALSE	FALSE	FALSE	FALSE	FALSE	FALSE
chr11	68341791	68343350	LRP5	29957	1	0	0	FALSE	FALSE	FALSE	TRUE	TRUE	TRUE	FALSE	FALSE	FALSE	FALSE	FALSE	FALSE
chr11	68353606	68355028	LRP5	41704	1	0	0	TRUE	FALSE	FALSE	TRUE	FALSE	FALSE	FALSE	FALSE	FALSE	FALSE	FALSE	FALSE
chr11	68355070	68355309	LRP5	42576	1	0	0	FALSE	FALSE	FALSE	TRUE	FALSE	FALSE	FALSE	FALSE	FALSE	FALSE	FALSE	FALSE
chr11	68355359	68355899	LRP5	43016	1	0	0	FALSE	FALSE	FALSE	TRUE	FALSE	FALSE	FALSE	FALSE	FALSE	FALSE	FALSE	FALSE
chr11	68380157	68381599	LRP5	-23415	1	0	0	TRUE	FALSE	FALSE	FALSE	FALSE	FALSE	FALSE	FALSE	FALSE	FALSE	FALSE	FALSE
chr11	68448828	68448946	PPP6R3	-11824	0	1	0	FALSE	FALSE	FALSE	TRUE	TRUE	FALSE	FALSE	FALSE	FALSE	FALSE	FALSE	FALSE
chr11	68833126	68833351	CPT1A	6446	1	0	0	FALSE	FALSE	TRUE	FALSE	FALSE	FALSE	FALSE	FALSE	TRUE	FALSE	FALSE	FALSE
chr11	68838542	68840462	CPT1A	182	1	0	0	TRUE	FALSE	FALSE	TRUE	FALSE	FALSE	FALSE	FALSE	FALSE	FALSE	FALSE	FALSE
chr11	68840622	68841931	CPT1A	655	1	0	0	FALSE	FALSE	FALSE	TRUE	FALSE	FALSE	FALSE	FALSE	FALSE	FALSE	FALSE	FALSE
chr11	68903800	68904200	IGHMBP2	0	0	0	1	FALSE	FALSE	FALSE	TRUE	TRUE	FALSE	FALSE	FALSE	FALSE	FALSE	FALSE	FALSE
chr11	68923756	68924062	IGHMBP2	-6093	1	0	0	TRUE	FALSE	FALSE	FALSE	FALSE	FALSE	FALSE	FALSE	FALSE	FALSE	FALSE	FALSE
chr11	68924307	68924640	IGHMBP2	-5529	1	0	0	TRUE	FALSE	FALSE	FALSE	FALSE	FALSE	FALSE	FALSE	FALSE	FALSE	FALSE	FALSE
chr11	68959816	68960327	MRGPRD	20915	1	0	0	FALSE	FALSE	TRUE	FALSE	FALSE	FALSE	FALSE	FALSE	FALSE	FALSE	FALSE	FALSE
chr11	68978627	68979633	MRGPRD	1856	1	0	0	TRUE	FALSE	FALSE	FALSE	FALSE	FALSE	TRUE	FALSE	FALSE	FALSE	FALSE	FALSE
chr11	68979914	68980135	MRGPRD	962	1	0	0	TRUE	FALSE	FALSE	FALSE	FALSE	FALSE	TRUE	FALSE	FALSE	FALSE	FALSE	FALSE
chr11	68992263	68992656	MRGPRD	-11473	1	0	0	TRUE	FALSE	FALSE	TRUE	FALSE	FALSE	FALSE	FALSE	FALSE	FALSE	FALSE	FALSE
chr11	68992934	68993091	MRGPRD	-12026	1	0	0	TRUE	FALSE	FALSE	TRUE	FALSE	FALSE	FALSE	FALSE	FALSE	FALSE	FALSE	FALSE
chr11	69010387	69010768	MRGPRF	754	1	0	0	FALSE	FALSE	TRUE	FALSE	FALSE	FALSE	FALSE	FALSE	FALSE	FALSE	FALSE	FALSE
chr11	69010952	69011353	MRGPRF	179	1	0	0	FALSE	FALSE	TRUE	FALSE	FALSE	FALSE	FALSE	FALSE	FALSE	FALSE	FALSE	FALSE
chr11	69044340	69044458	TPCN2	-4476	0	1	0	TRUE	FALSE	FALSE	TRUE	FALSE	FALSE	FALSE	FALSE	FALSE	FALSE	FALSE	FALSE
chr11	69048881	69049908	TPCN2	191	1	0	0	FALSE	FALSE	FALSE	TRUE	FALSE	FALSE	FALSE	FALSE	FALSE	FALSE	FALSE	FALSE
chr11	69054900	69055528	TPCN2	1111	1	0	0	TRUE	FALSE	TRUE	FALSE	FALSE	FALSE	FALSE	FALSE	FALSE	FALSE	FALSE	FALSE
chr11	69055738	69056518	TPCN2	2025	1	0	0	TRUE	FALSE	TRUE	FALSE	FALSE	FALSE	FALSE	FALSE	FALSE	FALSE	FALSE	FALSE
chr11	69094632	69094988	LOC107984344	-3915	1	0	0	FALSE	TRUE	FALSE	TRUE	FALSE	FALSE	FALSE	FALSE	FALSE	FALSE	FALSE	FALSE
chr11	69101515	69101633	LOC107984344	-10679	0	1	0	FALSE	FALSE	FALSE	FALSE	TRUE	FALSE	FALSE	FALSE	FALSE	FALSE	FALSE	FALSE
chr11	69114844	69116643	LOC107984345	-19011	0	1	0	FALSE	FALSE	TRUE	TRUE	FALSE	FALSE	FALSE	FALSE	FALSE	FALSE	FALSE	FALSE
chr11	69117630	69117937	LOC107984345	-16971	1	0	0	FALSE	FALSE	TRUE	FALSE	FALSE	FALSE	FALSE	FALSE	FALSE	FALSE	FALSE	FALSE
chr11	69121749	69123728	LOC107984345	-12016	1	0	0	FALSE	FALSE	FALSE	TRUE	FALSE	TRUE	FALSE	FALSE	FALSE	FALSE	FALSE	TRUE
chr11	69123784	69123990	LOC107984345	-10867	1	0	0	FALSE	FALSE	FALSE	TRUE	FALSE	FALSE	FALSE	FALSE	FALSE	FALSE	FALSE	FALSE
chr11	69124324	69124463	LOC107984345	-10361	1	0	0	FALSE	FALSE	FALSE	TRUE	FALSE	FALSE	FALSE	FALSE	FALSE	FALSE	FALSE	FALSE
chr11	69130642	69131212	LOC107984345	-3827	1	0	0	FALSE	TRUE	TRUE	FALSE	FALSE	FALSE	FALSE	FALSE	FALSE	FALSE	FALSE	FALSE
chr11	69131364	69132332	LOC107984345	-2906	1	0	0	FALSE	TRUE	TRUE	FALSE	FALSE	FALSE	FALSE	FALSE	FALSE	FALSE	FALSE	FALSE
chr11	69133997	69134154	LOC107984345	-679	1	0	0	FALSE	FALSE	FALSE	TRUE	FALSE	FALSE	FALSE	FALSE	FALSE	FALSE	FALSE	FALSE
chr11	69137975	69138202	LOC107984345	3334	1	0	0	FALSE	FALSE	FALSE	TRUE	FALSE	FALSE	FALSE	FALSE	FALSE	FALSE	FALSE	FALSE
chr11	69138334	69138561	LOC107984345	3693	1	0	0	FALSE	FALSE	FALSE	TRUE	FALSE	FALSE	FALSE	FALSE	FALSE	FALSE	FALSE	FALSE
chr11	69189970	69190266	LOC338694	-18556	1	0	0	TRUE	FALSE	FALSE	FALSE	FALSE	FALSE	FALSE	FALSE	FALSE	FALSE	FALSE	FALSE
chr11	69192113	69192227	LOC338694	-20608	1	0	0	TRUE	FALSE	FALSE	FALSE	FALSE	FALSE	FALSE	FALSE	FALSE	FALSE	FALSE	FALSE
chr11	69256525	69256840	LOC105369368	8682	1	0	0	FALSE	FALSE	FALSE	FALSE	TRUE	TRUE	FALSE	FALSE	FALSE	FALSE	FALSE	FALSE
chr11	69257130	69257288	LOC105369368	9209	1	0	0	FALSE	FALSE	FALSE	FALSE	TRUE	TRUE	FALSE	FALSE	FALSE	FALSE	FALSE	FALSE
chr11	69272920	69273405	MYEOV	-20975	1	0	0	TRUE	FALSE	FALSE	FALSE	FALSE	FALSE	FALSE	FALSE	FALSE	FALSE	FALSE	FALSE
chr11	69301412	69302518	MYEOV	7828	1	0	0	FALSE	FALSE	FALSE	FALSE	FALSE	TRUE	FALSE	FALSE	FALSE	FALSE	FALSE	FALSE
chr11	694740	695140	DEAF1	0	0	0	1	TRUE	FALSE	FALSE	FALSE	FALSE	FALSE	FALSE	FALSE	FALSE	FALSE	FALSE	FALSE
chr11	69562950	69563223	LINC01488	77526	1	0	0	FALSE	FALSE	FALSE	TRUE	FALSE	FALSE	FALSE	FALSE	FALSE	FALSE	FALSE	FALSE
chr11	69605829	69606052	CCND1	-35164	1	0	0	FALSE	FALSE	FALSE	TRUE	TRUE	TRUE	FALSE	FALSE	FALSE	TRUE	FALSE	FALSE
chr11	69606234	69606427	CCND1	-34774	1	0	0	FALSE	FALSE	FALSE	TRUE	TRUE	TRUE	FALSE	FALSE	FALSE	TRUE	FALSE	FALSE
chr11	69615162	69615266	CCND1	-25890	1	0	0	TRUE	FALSE	FALSE	FALSE	FALSE	FALSE	FALSE	FALSE	FALSE	FALSE	FALSE	FALSE
chr11	69615444	69616277	CCND1	-25244	1	0	0	TRUE	FALSE	FALSE	FALSE	FALSE	FALSE	FALSE	FALSE	FALSE	FALSE	FALSE	FALSE
chr11	69628738	69628905	CCND1	-12283	1	0	0	FALSE	FALSE	TRUE	FALSE	FALSE	FALSE	FALSE	FALSE	FALSE	FALSE	FALSE	FALSE
chr11	69641055	69641455	CCND1	0	0	0	1	FALSE	FALSE	FALSE	TRUE	TRUE	TRUE	FALSE	FALSE	FALSE	TRUE	TRUE	TRUE
chr11	69646973	69647091	CCND1	5928	0	1	0	FALSE	FALSE	FALSE	TRUE	FALSE	FALSE	FALSE	FALSE	FALSE	FALSE	FALSE	FALSE
chr11	69657809	69658995	ORAOV1	16952	1	0	0	TRUE	FALSE	FALSE	FALSE	FALSE	FALSE	TRUE	FALSE	FALSE	FALSE	FALSE	FALSE
chr11	69659843	69659961	ORAOV1	15452	0	1	0	FALSE	FALSE	FALSE	TRUE	FALSE	FALSE	FALSE	FALSE	FALSE	FALSE	FALSE	FALSE
chr11	69674439	69675397	ORAOV1	436	1	0	0	TRUE	FALSE	FALSE	FALSE	FALSE	FALSE	FALSE	FALSE	FALSE	FALSE	FALSE	FALSE
chr11	69686575	69686819	ORAOV1	-11300	1	0	0	TRUE	FALSE	TRUE	TRUE	TRUE	FALSE	FALSE	FALSE	FALSE	FALSE	FALSE	FALSE
chr11	69702002	69702120	FGF19	2277	0	1	0	FALSE	FALSE	FALSE	TRUE	FALSE	FALSE	FALSE	FALSE	FALSE	FALSE	FALSE	FALSE
chr11	69702261	69702538	FGF19	1939	1	0	0	FALSE	FALSE	FALSE	TRUE	FALSE	FALSE	FALSE	FALSE	FALSE	FALSE	FALSE	FALSE
chr11	69718264	69718382	FGF19	-13985	0	1	0	TRUE	FALSE	FALSE	FALSE	FALSE	FALSE	FALSE	FALSE	FALSE	FALSE	FALSE	FALSE
chr11	69731038	69731228	FGF19	-26795	1	0	0	TRUE	FALSE	FALSE	FALSE	FALSE	FALSE	FALSE	FALSE	FALSE	FALSE	FALSE	FALSE
chr11	69731336	69731454	FGF19	-27057	1	0	0	TRUE	FALSE	FALSE	FALSE	FALSE	FALSE	FALSE	FALSE	FALSE	FALSE	FALSE	FALSE
chr11	69745548	69745710	FGF4	29535	1	0	0	TRUE	FALSE	FALSE	FALSE	FALSE	FALSE	FALSE	FALSE	FALSE	FALSE	FALSE	FALSE
chr11	69745775	69745933	FGF4	29310	1	0	0	TRUE	FALSE	FALSE	FALSE	FALSE	FALSE	FALSE	FALSE	FALSE	FALSE	FALSE	FALSE
chr11	69821498	69821730	FGF3	-2190	1	0	0	FALSE	FALSE	TRUE	FALSE	FALSE	FALSE	FALSE	FALSE	FALSE	FALSE	FALSE	FALSE
chr11	69834546	69834689	FGF3	-15193	1	0	0	TRUE	FALSE	FALSE	FALSE	FALSE	FALSE	FALSE	FALSE	FALSE	FALSE	FALSE	FALSE
chr11	69835369	69835660	FGF3	-16090	1	0	0	TRUE	FALSE	FALSE	FALSE	FALSE	FALSE	TRUE	FALSE	FALSE	FALSE	FALSE	FALSE
chr11	69867649	69868465	FGF3	-48633	1	0	0	TRUE	FALSE	FALSE	FALSE	FALSE	FALSE	FALSE	FALSE	FALSE	FALSE	FALSE	FALSE
chr11	69874793	69874896	FGF3	-55420	1	0	0	FALSE	FALSE	FALSE	TRUE	TRUE	TRUE	FALSE	FALSE	FALSE	FALSE	FALSE	FALSE
chr11	69875300	69875593	FGF3	-56022	1	0	0	TRUE	FALSE	FALSE	TRUE	TRUE	TRUE	FALSE	FALSE	FALSE	FALSE	FALSE	FALSE
chr11	69881765	69881965	FGF3	-62441	1	0	0	TRUE	FALSE	FALSE	FALSE	FALSE	FALSE	FALSE	FALSE	FALSE	FALSE	FALSE	FALSE
chr11	69881969	69882323	FGF3	-62722	1	0	0	TRUE	FALSE	FALSE	FALSE	FALSE	FALSE	FALSE	FALSE	FALSE	FALSE	FALSE	FALSE
chr11	69889792	69890026	FGF3	-70485	1	0	0	FALSE	FALSE	FALSE	TRUE	FALSE	FALSE	FALSE	FALSE	FALSE	FALSE	FALSE	FALSE
chr11	69890106	69890333	FGF3	-70795	1	0	0	FALSE	FALSE	FALSE	TRUE	FALSE	FALSE	FALSE	FALSE	FALSE	FALSE	FALSE	FALSE
chr11	69934942	69935595	LOC107984355	-49275	1	0	0	TRUE	FALSE	FALSE	FALSE	FALSE	FALSE	FALSE	FALSE	FALSE	FALSE	FALSE	FALSE
chr11	69971730	69971959	LOC107984355	-12699	1	0	0	TRUE	FALSE	FALSE	FALSE	FALSE	FALSE	TRUE	FALSE	FALSE	FALSE	FALSE	FALSE
chr11	69972237	69972450	LOC107984355	-12200	1	0	0	TRUE	FALSE	FALSE	FALSE	FALSE	FALSE	TRUE	FALSE	FALSE	FALSE	FALSE	FALSE
chr11	69972707	69972880	LOC107984355	-11750	1	0	0	TRUE	FALSE	FALSE	FALSE	FALSE	FALSE	FALSE	FALSE	FALSE	FALSE	FALSE	FALSE
chr11	69982622	69983120	LOC107984355	-1672	1	0	0	FALSE	FALSE	FALSE	TRUE	FALSE	FALSE	FALSE	FALSE	FALSE	FALSE	FALSE	FALSE
chr11	69983192	69983423	LOC107984355	-1236	1	0	0	FALSE	FALSE	FALSE	TRUE	FALSE	FALSE	FALSE	FALSE	FALSE	FALSE	FALSE	FALSE
chr11	69999593	70000041	LOC107984355	15274	1	0	0	FALSE	FALSE	TRUE	FALSE	FALSE	FALSE	FALSE	FALSE	FALSE	FALSE	FALSE	FALSE
chr11	70050353	70050564	LOC105369371	-12693	1	0	0	FALSE	FALSE	TRUE	FALSE	FALSE	FALSE	FALSE	FALSE	FALSE	FALSE	FALSE	FALSE
chr11	70065064	70065264	LOC101928443	207	1	0	0	TRUE	FALSE	FALSE	FALSE	FALSE	FALSE	FALSE	FALSE	FALSE	FALSE	FALSE	FALSE
chr11	70156788	70156991	LOC105369372	-10945	1	0	0	TRUE	FALSE	FALSE	FALSE	FALSE	FALSE	FALSE	FALSE	FALSE	FALSE	FALSE	FALSE
chr11	70203162	70204728	FADD	783	1	0	0	FALSE	FALSE	FALSE	TRUE	FALSE	FALSE	FALSE	FALSE	FALSE	FALSE	FALSE	FALSE
chr11	70230877	70231118	FADD	27835	1	0	0	FALSE	FALSE	FALSE	TRUE	TRUE	FALSE	FALSE	FALSE	FALSE	FALSE	FALSE	FALSE
chr11	70231296	70231952	FADD	28462	1	0	0	FALSE	FALSE	FALSE	TRUE	TRUE	FALSE	FALSE	FALSE	FALSE	FALSE	FALSE	FALSE
chr11	70319670	70320065	LOC107984346	-4413	1	0	0	TRUE	FALSE	TRUE	FALSE	FALSE	TRUE	FALSE	FALSE	FALSE	FALSE	FALSE	FALSE
chr11	70390449	70390689	CTTN	-7936	1	0	0	TRUE	FALSE	FALSE	TRUE	FALSE	FALSE	FALSE	FALSE	FALSE	FALSE	FALSE	FALSE
chr11	70398454	70398854	CTTN	0	0	0	1	TRUE	FALSE	FALSE	FALSE	FALSE	FALSE	FALSE	FALSE	FALSE	FALSE	FALSE	FALSE
chr11	70413252	70413370	CTTN	14806	0	1	0	TRUE	FALSE	FALSE	FALSE	FALSE	FALSE	FALSE	FALSE	FALSE	FALSE	FALSE	FALSE
chr11	70421248	70421366	CTTN	22802	0	1	0	TRUE	FALSE	FALSE	FALSE	FALSE	FALSE	FALSE	FALSE	FALSE	FALSE	FALSE	FALSE
chr11	70424972	70425090	CTTN	26526	0	1	0	TRUE	FALSE	FALSE	FALSE	FALSE	FALSE	FALSE	FALSE	FALSE	FALSE	FALSE	FALSE
chr11	70471368	70471486	CTTN	72922	0	1	0	TRUE	FALSE	FALSE	FALSE	FALSE	FALSE	FALSE	FALSE	FALSE	FALSE	FALSE	FALSE
chr11	70524814	70525229	SHANK2-AS1	-106072	1	0	0	TRUE	FALSE	FALSE	FALSE	FALSE	FALSE	FALSE	FALSE	FALSE	FALSE	FALSE	FALSE
chr11	70527721	70527906	SHANK2-AS1	-103280	1	0	0	FALSE	FALSE	FALSE	TRUE	TRUE	FALSE	FALSE	FALSE	FALSE	FALSE	FALSE	FALSE
chr11	70528288	70528486	SHANK2-AS1	-102706	1	0	0	FALSE	FALSE	FALSE	TRUE	FALSE	FALSE	FALSE	FALSE	FALSE	FALSE	FALSE	FALSE
chr11	70731874	70732145	SHANK2	-11222	1	0	0	TRUE	FALSE	FALSE	FALSE	FALSE	FALSE	FALSE	FALSE	FALSE	FALSE	FALSE	FALSE
chr11	70755440	70755760	SHANK2	-34813	0	1	0	FALSE	FALSE	TRUE	FALSE	FALSE	FALSE	FALSE	FALSE	FALSE	FALSE	FALSE	FALSE
chr11	70756917	70757035	SHANK2	-36189	0	1	0	TRUE	FALSE	FALSE	FALSE	FALSE	FALSE	FALSE	FALSE	FALSE	FALSE	FALSE	FALSE
chr11	70769202	70769484	SHANK2	-48556	1	0	0	TRUE	FALSE	FALSE	FALSE	FALSE	FALSE	FALSE	FALSE	FALSE	FALSE	FALSE	FALSE
chr11	70806172	70806290	SHANK2	20526	0	1	0	TRUE	FALSE	FALSE	FALSE	FALSE	FALSE	FALSE	FALSE	FALSE	FALSE	FALSE	FALSE
chr11	70816219	70816381	SHANK2	10457	1	0	0	FALSE	FALSE	FALSE	TRUE	FALSE	FALSE	FALSE	FALSE	FALSE	FALSE	FALSE	FALSE
chr11	70816473	70816762	SHANK2	10140	1	0	0	FALSE	FALSE	FALSE	TRUE	FALSE	FALSE	FALSE	FALSE	FALSE	FALSE	FALSE	FALSE
chr11	70833211	70833353	SHANK2	-6525	1	0	0	TRUE	FALSE	FALSE	FALSE	FALSE	FALSE	FALSE	FALSE	FALSE	FALSE	FALSE	FALSE
chr11	708988	709539	LOC105376508	-2605	1	0	0	TRUE	FALSE	FALSE	FALSE	FALSE	FALSE	TRUE	FALSE	FALSE	FALSE	FALSE	FALSE
chr11	70944256	70944437	MIR3664	-71978	1	0	0	TRUE	FALSE	FALSE	FALSE	FALSE	FALSE	FALSE	FALSE	FALSE	FALSE	FALSE	FALSE
chr11	70948356	70948738	MIR3664	-76179	1	0	0	FALSE	FALSE	FALSE	TRUE	FALSE	FALSE	FALSE	FALSE	FALSE	FALSE	FALSE	FALSE
chr11	70949051	70949450	MIR3664	-76882	1	0	0	FALSE	FALSE	FALSE	TRUE	FALSE	FALSE	FALSE	FALSE	FALSE	FALSE	FALSE	FALSE
chr11	709573	710091	LOC105376508	-3174	1	0	0	TRUE	TRUE	FALSE	FALSE	FALSE	FALSE	TRUE	TRUE	FALSE	FALSE	FALSE	FALSE
chr11	710234	710576	LOC105376508	-3747	1	0	0	FALSE	TRUE	FALSE	FALSE	FALSE	FALSE	FALSE	TRUE	FALSE	FALSE	FALSE	FALSE
chr11	710804	711358	LOC105376508	-4423	1	0	0	TRUE	TRUE	FALSE	FALSE	FALSE	FALSE	FALSE	TRUE	FALSE	FALSE	FALSE	FALSE
chr11	71146524	71146727	SHANK2	78171	1	0	0	TRUE	FALSE	FALSE	TRUE	FALSE	FALSE	FALSE	FALSE	FALSE	FALSE	FALSE	FALSE
chr11	71146806	71147020	SHANK2	77883	1	0	0	TRUE	FALSE	FALSE	TRUE	FALSE	FALSE	FALSE	FALSE	FALSE	FALSE	FALSE	FALSE
chr11	71170599	71170787	SHANK2	54103	1	0	0	TRUE	FALSE	FALSE	FALSE	FALSE	FALSE	FALSE	FALSE	FALSE	FALSE	FALSE	FALSE
chr11	71193630	71193749	SHANK2	31107	1	0	0	TRUE	FALSE	FALSE	FALSE	FALSE	FALSE	FALSE	FALSE	FALSE	FALSE	FALSE	FALSE
chr11	71251194	71253683	SHANK2	286	1	0	0	FALSE	FALSE	TRUE	TRUE	TRUE	FALSE	FALSE	FALSE	FALSE	TRUE	FALSE	FALSE
chr11	71281962	71282159	SHANK2	-29336	1	0	0	TRUE	FALSE	FALSE	FALSE	FALSE	FALSE	FALSE	FALSE	FALSE	FALSE	FALSE	FALSE
chr11	71282394	71283401	SHANK2	-30173	1	0	0	TRUE	FALSE	FALSE	FALSE	FALSE	FALSE	TRUE	FALSE	FALSE	FALSE	FALSE	FALSE
chr11	72040800	72041200	NUMA1	0	0	0	1	TRUE	FALSE	FALSE	FALSE	FALSE	FALSE	FALSE	FALSE	FALSE	FALSE	FALSE	FALSE
chr11	72102479	72103387	LAMTOR1	454	1	0	0	FALSE	FALSE	FALSE	TRUE	TRUE	TRUE	FALSE	FALSE	FALSE	TRUE	FALSE	FALSE
chr11	72102966	72103366	LAMTOR1	0	0	0	1	FALSE	FALSE	FALSE	TRUE	FALSE	FALSE	FALSE	FALSE	FALSE	FALSE	FALSE	FALSE
chr11	72432007	72432203	CLPB	2452	1	0	0	TRUE	FALSE	FALSE	FALSE	FALSE	FALSE	FALSE	FALSE	FALSE	FALSE	FALSE	FALSE
chr11	72434223	72434623	CLPB	0	0	0	1	FALSE	FALSE	FALSE	TRUE	TRUE	FALSE	FALSE	FALSE	FALSE	FALSE	TRUE	FALSE
chr11	72471231	72471437	CLPB	-36650	1	0	0	TRUE	FALSE	FALSE	FALSE	FALSE	FALSE	FALSE	FALSE	FALSE	FALSE	FALSE	FALSE
chr11	72693681	72693799	PDE2A	-19287	0	1	0	FALSE	FALSE	FALSE	TRUE	FALSE	FALSE	FALSE	FALSE	FALSE	FALSE	FALSE	FALSE
chr11	72725340	72725458	ARAP1	-3041	0	1	0	TRUE	FALSE	FALSE	FALSE	FALSE	FALSE	FALSE	FALSE	FALSE	FALSE	FALSE	FALSE
chr11	72787058	72788208	MIR4692	4104	1	0	0	FALSE	FALSE	FALSE	TRUE	FALSE	FALSE	FALSE	FALSE	FALSE	FALSE	FALSE	FALSE
chr11	73194664	73195052	P2RY2	-5557	1	0	0	FALSE	FALSE	FALSE	TRUE	FALSE	FALSE	FALSE	FALSE	FALSE	FALSE	FALSE	FALSE
chr11	73195202	73195787	P2RY2	-4921	1	0	0	FALSE	FALSE	FALSE	TRUE	FALSE	FALSE	FALSE	FALSE	FALSE	FALSE	FALSE	FALSE
chr11	73258010	73258128	LOC105369382	4644	0	1	0	TRUE	FALSE	FALSE	TRUE	FALSE	FALSE	FALSE	FALSE	FALSE	FALSE	FALSE	FALSE
chr11	73295568	73295686	P2RY6	5205	0	1	0	FALSE	FALSE	TRUE	FALSE	FALSE	FALSE	FALSE	FALSE	FALSE	FALSE	FALSE	FALSE
chr11	73340120	73340259	ARHGEF17	-6788	1	0	0	TRUE	TRUE	FALSE	FALSE	FALSE	FALSE	FALSE	FALSE	FALSE	FALSE	FALSE	FALSE
chr11	73345102	73345220	ARHGEF17	-1816	0	1	0	TRUE	FALSE	FALSE	FALSE	FALSE	FALSE	FALSE	FALSE	FALSE	FALSE	FALSE	FALSE
chr11	73376286	73376686	RELT	0	0	0	1	TRUE	FALSE	FALSE	FALSE	FALSE	FALSE	FALSE	FALSE	FALSE	FALSE	FALSE	FALSE
chr11	73384492	73384610	RELT	-4560	0	1	0	TRUE	FALSE	FALSE	FALSE	FALSE	FALSE	FALSE	FALSE	FALSE	FALSE	FALSE	FALSE
chr11	73387451	73387569	RELT	-1601	0	1	0	FALSE	FALSE	FALSE	TRUE	FALSE	FALSE	FALSE	FALSE	FALSE	FALSE	FALSE	FALSE
chr11	73387717	73387835	RELT	-1335	0	1	0	FALSE	FALSE	FALSE	TRUE	FALSE	FALSE	FALSE	FALSE	FALSE	FALSE	FALSE	FALSE
chr11	73398184	73398302	RELT	5542	0	1	0	FALSE	FALSE	FALSE	TRUE	FALSE	TRUE	FALSE	FALSE	FALSE	FALSE	FALSE	FALSE
chr11	73597821	73598221	FAM168A	0	0	0	1	TRUE	FALSE	FALSE	FALSE	FALSE	FALSE	FALSE	FALSE	FALSE	FALSE	FALSE	FALSE
chr11	73787871	73788689	MRPL48	377	1	0	0	TRUE	FALSE	FALSE	TRUE	TRUE	TRUE	FALSE	FALSE	FALSE	TRUE	TRUE	FALSE
chr11	74269548	74269775	P4HA3	34668	1	0	0	TRUE	FALSE	FALSE	FALSE	FALSE	FALSE	FALSE	FALSE	FALSE	FALSE	FALSE	FALSE
chr11	74493384	74493710	LOC100287896	163	1	0	0	FALSE	FALSE	FALSE	TRUE	TRUE	FALSE	FALSE	FALSE	FALSE	TRUE	TRUE	FALSE
chr11	74744507	74744620	RNF169	-4292	1	0	0	TRUE	FALSE	FALSE	FALSE	FALSE	FALSE	FALSE	FALSE	FALSE	FALSE	FALSE	FALSE
chr11	74748867	74750232	RNF169	682	1	0	0	TRUE	FALSE	FALSE	FALSE	FALSE	FALSE	FALSE	FALSE	FALSE	FALSE	FALSE	FALSE
chr11	74929871	74929989	LOC107984352	-3555	0	1	0	TRUE	FALSE	FALSE	FALSE	FALSE	FALSE	TRUE	FALSE	FALSE	FALSE	FALSE	FALSE
chr11	74948784	74949184	XRRA1	0	0	0	1	TRUE	FALSE	FALSE	FALSE	FALSE	FALSE	FALSE	FALSE	FALSE	FALSE	FALSE	FALSE
chr11	7512457	7512764	PPFIBP2	-1154	1	0	0	TRUE	FALSE	FALSE	FALSE	FALSE	FALSE	FALSE	FALSE	FALSE	FALSE	FALSE	FALSE
chr11	75240904	75242396	TPBGL	746	0	1	0	TRUE	FALSE	FALSE	TRUE	FALSE	TRUE	TRUE	FALSE	FALSE	FALSE	FALSE	FALSE
chr11	75267310	75267873	TPBGL	26687	1	0	0	FALSE	FALSE	FALSE	TRUE	FALSE	FALSE	FALSE	FALSE	FALSE	FALSE	FALSE	FALSE
chr11	75388835	75388953	RPS3	-10596	0	1	0	TRUE	FALSE	FALSE	FALSE	FALSE	FALSE	FALSE	FALSE	FALSE	FALSE	FALSE	FALSE
chr11	75389078	75389420	RPS3	-10241	1	0	0	TRUE	FALSE	FALSE	FALSE	FALSE	FALSE	FALSE	FALSE	FALSE	FALSE	FALSE	FALSE
chr11	75399588	75399706	RPS3	157	0	1	0	FALSE	FALSE	FALSE	TRUE	TRUE	TRUE	FALSE	FALSE	FALSE	FALSE	TRUE	TRUE
chr11	75429883	75430283	KLHL35	0	0	0	1	FALSE	FALSE	FALSE	TRUE	FALSE	FALSE	FALSE	FALSE	FALSE	FALSE	FALSE	FALSE
chr11	75432173	75432579	KLHL35	-1747	0	1	0	TRUE	FALSE	FALSE	FALSE	FALSE	FALSE	FALSE	FALSE	FALSE	FALSE	FALSE	FALSE
chr11	75438049	75438628	KLHL35	-3788	1	0	0	FALSE	TRUE	FALSE	FALSE	FALSE	FALSE	FALSE	FALSE	FALSE	FALSE	FALSE	FALSE
chr11	75534557	75534675	GDPD5	-8700	0	1	0	FALSE	FALSE	FALSE	TRUE	TRUE	TRUE	FALSE	FALSE	FALSE	FALSE	FALSE	FALSE
chr11	75543751	75543998	GDPD5	-17958	1	0	0	TRUE	FALSE	FALSE	FALSE	FALSE	FALSE	FALSE	FALSE	FALSE	FALSE	FALSE	FALSE
chr11	75547676	75547794	SERPINH1	-14320	0	1	0	TRUE	FALSE	FALSE	FALSE	TRUE	FALSE	FALSE	FALSE	FALSE	FALSE	FALSE	FALSE
chr11	75562028	75563590	SERPINH1	464	0	1	0	FALSE	FALSE	FALSE	FALSE	TRUE	FALSE	FALSE	FALSE	FALSE	FALSE	FALSE	FALSE
chr11	75563815	75564523	SERPINH1	1824	0	1	0	FALSE	FALSE	FALSE	TRUE	TRUE	TRUE	FALSE	FALSE	FALSE	FALSE	FALSE	FALSE
chr11	75565059	75565463	SERPINH1	2916	1	0	0	FALSE	FALSE	FALSE	FALSE	FALSE	TRUE	FALSE	FALSE	FALSE	FALSE	FALSE	FALSE
chr11	75576562	75576680	LOC105369391	-4857	0	1	0	TRUE	FALSE	FALSE	FALSE	FALSE	FALSE	FALSE	FALSE	FALSE	FALSE	FALSE	FALSE
chr11	75582460	75584689	LOC105369391	2096	0	1	0	FALSE	FALSE	FALSE	TRUE	FALSE	FALSE	FALSE	FALSE	FALSE	FALSE	FALSE	FALSE
chr11	75597774	75597892	MAP6	13687	0	1	0	FALSE	FALSE	TRUE	FALSE	FALSE	FALSE	FALSE	FALSE	FALSE	FALSE	FALSE	FALSE
chr11	75815118	75815518	UVRAG	0	0	0	1	FALSE	FALSE	FALSE	TRUE	TRUE	TRUE	FALSE	FALSE	FALSE	TRUE	TRUE	TRUE
chr11	76182849	76183264	WNT11	11806	1	0	0	FALSE	TRUE	FALSE	FALSE	FALSE	FALSE	FALSE	FALSE	FALSE	FALSE	FALSE	FALSE
chr11	76228776	76229080	LOC107984359	-11119	1	0	0	FALSE	FALSE	FALSE	FALSE	TRUE	FALSE	FALSE	FALSE	FALSE	FALSE	FALSE	FALSE
chr11	76283226	76283396	LOC105369395	-1085	1	0	0	TRUE	FALSE	FALSE	FALSE	FALSE	FALSE	FALSE	FALSE	FALSE	FALSE	FALSE	FALSE
chr11	76309777	76309956	LOC105369395	18067	1	0	0	TRUE	FALSE	FALSE	FALSE	FALSE	FALSE	FALSE	FALSE	FALSE	FALSE	FALSE	FALSE
chr11	76313744	76314314	LOC105369395	22230	1	0	0	FALSE	FALSE	FALSE	FALSE	TRUE	FALSE	FALSE	FALSE	FALSE	FALSE	FALSE	FALSE
chr11	76408581	76408859	LOC100506127	27408	1	0	0	TRUE	FALSE	FALSE	FALSE	FALSE	FALSE	FALSE	FALSE	FALSE	FALSE	FALSE	FALSE
chr11	76625000	76625262	LOC101928813	5232	1	0	0	TRUE	FALSE	FALSE	FALSE	FALSE	FALSE	FALSE	FALSE	FALSE	FALSE	FALSE	FALSE
chr11	76670516	76670634	LRRC32	-80	0	1	0	TRUE	FALSE	FALSE	FALSE	FALSE	FALSE	FALSE	FALSE	FALSE	FALSE	FALSE	FALSE
chr11	76670752	76670870	LRRC32	-64	0	1	0	TRUE	FALSE	FALSE	FALSE	FALSE	FALSE	FALSE	FALSE	FALSE	FALSE	FALSE	FALSE
chr11	76674523	76674641	LRRC32	-3641	0	1	0	TRUE	FALSE	FALSE	FALSE	FALSE	FALSE	FALSE	FALSE	FALSE	FALSE	FALSE	FALSE
chr11	76698357	76698475	GUCY2EP	23373	0	1	0	TRUE	FALSE	TRUE	FALSE	FALSE	FALSE	FALSE	FALSE	FALSE	FALSE	FALSE	FALSE
chr11	76759878	76759996	LOC105369397	7341	0	1	0	TRUE	FALSE	FALSE	FALSE	FALSE	FALSE	FALSE	FALSE	FALSE	FALSE	FALSE	FALSE
chr11	76802679	76802940	TSKU	11058	1	0	0	FALSE	FALSE	TRUE	FALSE	FALSE	FALSE	FALSE	FALSE	FALSE	FALSE	FALSE	FALSE
chr11	76803168	76803513	TSKU	11589	1	0	0	FALSE	FALSE	TRUE	FALSE	FALSE	FALSE	FALSE	FALSE	FALSE	FALSE	FALSE	FALSE
chr11	77039544	77039662	B3GNT6	5263	0	1	0	TRUE	FALSE	FALSE	FALSE	FALSE	FALSE	FALSE	FALSE	FALSE	FALSE	FALSE	FALSE
chr11	77046181	77046299	LOC105369399	-1625	0	1	0	TRUE	FALSE	TRUE	FALSE	FALSE	FALSE	FALSE	FALSE	FALSE	FALSE	FALSE	FALSE
chr11	77073346	77073464	CAPN5	1796	0	1	0	TRUE	FALSE	FALSE	FALSE	FALSE	FALSE	FALSE	FALSE	FALSE	FALSE	FALSE	FALSE
chr11	77091274	77091392	OMP	-11506	0	1	0	TRUE	FALSE	FALSE	FALSE	FALSE	FALSE	FALSE	FALSE	FALSE	FALSE	FALSE	FALSE
chr11	77091475	77091739	OMP	-11232	1	0	0	TRUE	FALSE	FALSE	FALSE	FALSE	FALSE	FALSE	FALSE	FALSE	FALSE	FALSE	FALSE
chr11	77119502	77119620	MYO7A	-8630	0	1	0	TRUE	FALSE	FALSE	FALSE	FALSE	FALSE	FALSE	FALSE	FALSE	FALSE	FALSE	FALSE
chr11	77121613	77121731	MYO7A	-6519	0	1	0	FALSE	FALSE	FALSE	TRUE	TRUE	FALSE	FALSE	FALSE	FALSE	FALSE	FALSE	FALSE
chr11	77144499	77144710	MYO7A	6310	1	0	0	FALSE	FALSE	TRUE	FALSE	FALSE	FALSE	FALSE	FALSE	FALSE	FALSE	FALSE	FALSE
chr11	77144756	77145035	MYO7A	6601	1	0	0	FALSE	FALSE	TRUE	FALSE	FALSE	FALSE	FALSE	FALSE	FALSE	FALSE	FALSE	FALSE
chr11	77145105	77145295	MYO7A	6906	1	0	0	FALSE	FALSE	TRUE	FALSE	FALSE	FALSE	FALSE	FALSE	FALSE	FALSE	FALSE	FALSE
chr11	77178998	77179570	MYO7A	26655	1	0	0	FALSE	FALSE	FALSE	TRUE	FALSE	FALSE	FALSE	FALSE	FALSE	FALSE	FALSE	FALSE
chr11	77214033	77214437	MYO7A	61606	1	0	0	TRUE	FALSE	FALSE	FALSE	FALSE	FALSE	FALSE	FALSE	FALSE	FALSE	FALSE	FALSE
chr11	77214536	77214770	MYO7A	62024	1	0	0	TRUE	FALSE	FALSE	FALSE	FALSE	FALSE	FALSE	FALSE	FALSE	FALSE	FALSE	FALSE
chr11	77473029	77474063	PAK1	173	1	0	0	FALSE	FALSE	FALSE	TRUE	FALSE	FALSE	FALSE	FALSE	FALSE	TRUE	FALSE	FALSE
chr11	776851	776969	PDDC1	574	0	1	0	FALSE	TRUE	FALSE	FALSE	FALSE	FALSE	FALSE	FALSE	FALSE	FALSE	FALSE	FALSE
chr11	777295	777413	PDDC1	130	0	1	0	FALSE	TRUE	FALSE	FALSE	FALSE	FALSE	FALSE	FALSE	FALSE	FALSE	FALSE	FALSE
chr11	77994370	77994770	INTS4	0	0	0	1	FALSE	FALSE	FALSE	TRUE	TRUE	TRUE	FALSE	FALSE	FALSE	TRUE	TRUE	TRUE
chr11	78034874	78034992	KCTD14	11258	0	1	0	TRUE	FALSE	FALSE	FALSE	FALSE	FALSE	TRUE	FALSE	FALSE	FALSE	FALSE	FALSE
chr11	78079595	78079995	NDUFC2-KCTD14	0	0	0	1	FALSE	FALSE	FALSE	TRUE	TRUE	FALSE	FALSE	FALSE	FALSE	FALSE	TRUE	FALSE
chr11	78148011	78148343	KCTD21-AS1	8385	1	0	0	FALSE	TRUE	FALSE	FALSE	FALSE	FALSE	FALSE	FALSE	FALSE	FALSE	FALSE	FALSE
chr11	78188321	78188721	KCTD21	0	0	0	1	FALSE	FALSE	FALSE	FALSE	FALSE	TRUE	FALSE	FALSE	FALSE	FALSE	FALSE	FALSE
chr11	78188810	78189210	USP35	0	0	0	1	FALSE	FALSE	FALSE	FALSE	FALSE	TRUE	FALSE	FALSE	FALSE	FALSE	FALSE	FALSE
chr11	783704	783822	LOC171391	6186	0	1	0	TRUE	FALSE	FALSE	FALSE	FALSE	FALSE	FALSE	FALSE	FALSE	FALSE	FALSE	FALSE
chr11	78417517	78417917	GAB2	0	0	0	1	TRUE	FALSE	TRUE	FALSE	FALSE	FALSE	FALSE	FALSE	FALSE	FALSE	FALSE	FALSE
chr11	78574519	78574919	NARS2	0	0	0	1	FALSE	FALSE	FALSE	TRUE	FALSE	FALSE	FALSE	FALSE	FALSE	FALSE	FALSE	FALSE
chr11	78574862	78574980	NARS2	-57	0	1	0	FALSE	FALSE	FALSE	TRUE	TRUE	FALSE	FALSE	FALSE	FALSE	TRUE	FALSE	FALSE
chr11	78914802	78914946	TENM4	-147349	1	0	0	TRUE	FALSE	FALSE	FALSE	FALSE	FALSE	FALSE	FALSE	FALSE	FALSE	FALSE	FALSE
chr11	78966712	78966902	TENM4	157747	1	0	0	TRUE	FALSE	FALSE	FALSE	FALSE	FALSE	FALSE	FALSE	FALSE	FALSE	FALSE	FALSE
chr11	79001874	79002001	TENM4	122617	1	0	0	FALSE	FALSE	TRUE	FALSE	FALSE	FALSE	FALSE	FALSE	FALSE	FALSE	FALSE	FALSE
chr11	79064772	79064941	TENM4	59698	1	0	0	FALSE	FALSE	FALSE	TRUE	FALSE	TRUE	FALSE	FALSE	FALSE	FALSE	FALSE	FALSE
chr11	79088225	79088441	TENM4	36221	1	0	0	TRUE	FALSE	FALSE	FALSE	FALSE	FALSE	FALSE	FALSE	FALSE	FALSE	FALSE	FALSE
chr11	79113075	79113342	TENM4	11346	1	0	0	TRUE	FALSE	FALSE	FALSE	FALSE	FALSE	FALSE	FALSE	FALSE	FALSE	FALSE	FALSE
chr11	79121335	79121812	TENM4	2981	1	0	0	TRUE	FALSE	FALSE	FALSE	FALSE	FALSE	FALSE	FALSE	FALSE	FALSE	FALSE	FALSE
chr11	79244190	79244564	TENM4	-119823	1	0	0	TRUE	FALSE	FALSE	FALSE	FALSE	FALSE	FALSE	FALSE	FALSE	FALSE	FALSE	FALSE
chr11	79244838	79245111	TENM4	-120420	1	0	0	TRUE	FALSE	FALSE	FALSE	FALSE	FALSE	FALSE	FALSE	FALSE	FALSE	FALSE	FALSE
chr11	79418893	79419824	MIR5579	2868	1	0	0	FALSE	FALSE	FALSE	TRUE	FALSE	FALSE	FALSE	FALSE	FALSE	FALSE	FALSE	FALSE
chr11	79461175	79461293	TENM4	-20215	0	1	0	TRUE	FALSE	FALSE	FALSE	FALSE	FALSE	FALSE	FALSE	FALSE	FALSE	FALSE	FALSE
chr11	79578458	79578576	LOC105369405	-17103	0	1	0	FALSE	FALSE	FALSE	TRUE	FALSE	FALSE	FALSE	FALSE	FALSE	FALSE	FALSE	FALSE
chr11	798283	798401	SLC25A22	-73	0	1	0	FALSE	FALSE	FALSE	TRUE	FALSE	TRUE	FALSE	FALSE	FALSE	TRUE	FALSE	FALSE
chr11	7987014	7987132	EIF3F	-246	0	1	0	FALSE	FALSE	FALSE	TRUE	TRUE	TRUE	FALSE	FALSE	FALSE	TRUE	TRUE	FALSE
chr11	809869	810269	RPLP2	0	0	0	1	FALSE	FALSE	FALSE	TRUE	TRUE	TRUE	FALSE	FALSE	FALSE	TRUE	TRUE	FALSE
chr11	810126	810244	RPLP2	250	0	1	0	FALSE	FALSE	TRUE	TRUE	TRUE	TRUE	FALSE	FALSE	FALSE	FALSE	FALSE	FALSE
chr11	819470	819870	PNPLA2	0	0	0	1	FALSE	FALSE	FALSE	TRUE	FALSE	FALSE	FALSE	FALSE	FALSE	FALSE	FALSE	FALSE
chr11	820378	820496	PNPLA2	868	0	1	0	FALSE	FALSE	FALSE	TRUE	FALSE	FALSE	FALSE	FALSE	FALSE	FALSE	FALSE	FALSE
chr11	827138	827256	CRACR2B	-98	0	1	0	FALSE	FALSE	FALSE	TRUE	TRUE	FALSE	FALSE	FALSE	FALSE	FALSE	FALSE	FALSE
chr11	82732549	82733931	FAM181B	624	0	1	0	TRUE	FALSE	TRUE	FALSE	TRUE	TRUE	FALSE	FALSE	FALSE	FALSE	FALSE	FALSE
chr11	827593	827711	CRACR2B	180	0	1	0	FALSE	FALSE	FALSE	TRUE	TRUE	FALSE	FALSE	FALSE	FALSE	FALSE	FALSE	FALSE
chr11	83157094	83157603	PCF11	254	1	0	0	FALSE	FALSE	FALSE	TRUE	FALSE	FALSE	FALSE	FALSE	FALSE	TRUE	FALSE	FALSE
chr11	83157666	83158389	PCF11	933	1	0	0	FALSE	FALSE	FALSE	TRUE	FALSE	FALSE	FALSE	FALSE	FALSE	TRUE	FALSE	FALSE
chr11	83816722	83816840	DLG2	-27891	0	1	0	TRUE	FALSE	FALSE	FALSE	FALSE	FALSE	FALSE	FALSE	FALSE	FALSE	FALSE	FALSE
chr11	842223	842623	POLR2L	0	0	0	1	FALSE	FALSE	FALSE	TRUE	TRUE	TRUE	FALSE	FALSE	FALSE	TRUE	FALSE	FALSE
chr11	842753	843153	TSPAN4	0	0	0	1	FALSE	FALSE	FALSE	TRUE	TRUE	TRUE	FALSE	FALSE	FALSE	TRUE	FALSE	FALSE
chr11	848105	848223	TSPAN4	3719	0	1	0	TRUE	FALSE	FALSE	FALSE	FALSE	FALSE	FALSE	FALSE	FALSE	FALSE	FALSE	FALSE
chr11	850836	850954	TSPAN4	6450	0	1	0	FALSE	FALSE	FALSE	FALSE	FALSE	TRUE	FALSE	FALSE	FALSE	FALSE	FALSE	TRUE
chr11	85628039	85628439	DLG2	0	0	0	1	FALSE	FALSE	FALSE	TRUE	TRUE	FALSE	FALSE	FALSE	FALSE	TRUE	TRUE	FALSE
chr11	85663218	85665138	CREBZF	960	0	1	0	FALSE	FALSE	TRUE	TRUE	TRUE	FALSE	FALSE	FALSE	FALSE	FALSE	FALSE	FALSE
chr11	85664807	85665207	CREBZF	0	0	0	1	TRUE	FALSE	FALSE	FALSE	FALSE	FALSE	FALSE	FALSE	FALSE	FALSE	FALSE	FALSE
chr11	85809803	85810403	SYTL2	1049	1	0	0	TRUE	FALSE	FALSE	FALSE	FALSE	FALSE	FALSE	FALSE	FALSE	FALSE	FALSE	FALSE
chr11	86244383	86245671	EED	484	1	0	0	TRUE	FALSE	FALSE	TRUE	FALSE	FALSE	FALSE	FALSE	FALSE	FALSE	FALSE	FALSE
chr11	86245773	86246157	EED	1422	1	0	0	TRUE	FALSE	FALSE	FALSE	FALSE	FALSE	FALSE	FALSE	FALSE	FALSE	FALSE	FALSE
chr11	86302404	86302522	C11orf73	235	0	1	0	TRUE	FALSE	FALSE	FALSE	FALSE	FALSE	FALSE	FALSE	FALSE	FALSE	FALSE	FALSE
chr11	86346708	86346826	LOC105369421	13655	0	1	0	FALSE	FALSE	FALSE	FALSE	FALSE	TRUE	FALSE	FALSE	FALSE	FALSE	FALSE	FALSE
chr11	86800442	86800842	PRSS23	0	0	0	1	TRUE	FALSE	FALSE	FALSE	FALSE	FALSE	FALSE	FALSE	FALSE	FALSE	FALSE	FALSE
chr11	8682447	8683226	TRIM66	-147	1	0	0	FALSE	FALSE	FALSE	TRUE	TRUE	TRUE	FALSE	FALSE	FALSE	FALSE	FALSE	FALSE
chr11	86956398	86956872	LOC100506368	1015	1	0	0	TRUE	FALSE	FALSE	FALSE	FALSE	FALSE	FALSE	FALSE	FALSE	FALSE	FALSE	FALSE
chr11	8730249	8730367	LOC107984308	12179	0	1	0	FALSE	FALSE	TRUE	FALSE	FALSE	FALSE	FALSE	FALSE	FALSE	FALSE	FALSE	FALSE
chr11	9015729	9015847	LOC105376541	11440	0	1	0	FALSE	FALSE	FALSE	TRUE	FALSE	FALSE	FALSE	FALSE	FALSE	FALSE	FALSE	FALSE
chr11	93741190	93741590	TAF1D	0	0	0	1	FALSE	FALSE	FALSE	TRUE	TRUE	TRUE	FALSE	FALSE	FALSE	FALSE	FALSE	FALSE
chr11	93741535	93741653	C11orf54	1	0	1	0	FALSE	FALSE	FALSE	TRUE	TRUE	TRUE	FALSE	FALSE	FALSE	FALSE	FALSE	FALSE
chr11	93741559	93741959	C11orf54	0	0	0	1	FALSE	FALSE	FALSE	TRUE	TRUE	TRUE	FALSE	FALSE	FALSE	FALSE	FALSE	FALSE
chr11	93784124	93784242	MED17	-55	0	1	0	FALSE	FALSE	FALSE	TRUE	FALSE	FALSE	FALSE	FALSE	FALSE	FALSE	FALSE	FALSE
chr11	93784185	93784585	MED17	0	0	0	1	FALSE	FALSE	FALSE	TRUE	TRUE	TRUE	FALSE	FALSE	FALSE	FALSE	FALSE	FALSE
chr11	93849804	93850502	VSTM5	349	1	0	0	TRUE	FALSE	FALSE	FALSE	FALSE	FALSE	FALSE	FALSE	FALSE	FALSE	FALSE	FALSE
chr11	94469257	94469375	MIR548L	-2736	0	1	0	TRUE	FALSE	FALSE	FALSE	FALSE	FALSE	FALSE	FALSE	FALSE	FALSE	FALSE	FALSE
chr11	94493528	94493928	MRE11A	0	0	0	1	FALSE	FALSE	FALSE	TRUE	TRUE	TRUE	FALSE	FALSE	FALSE	TRUE	TRUE	FALSE
chr11	94493889	94494289	ANKRD49	0	0	0	1	FALSE	FALSE	FALSE	TRUE	TRUE	TRUE	FALSE	FALSE	FALSE	TRUE	TRUE	FALSE
chr11	94494191	94494309	ANKRD49	174	0	1	0	FALSE	FALSE	FALSE	TRUE	FALSE	FALSE	FALSE	FALSE	FALSE	TRUE	FALSE	FALSE
chr11	94544289	94544689	FUT4	0	0	0	1	FALSE	FALSE	FALSE	TRUE	FALSE	FALSE	FALSE	FALSE	FALSE	FALSE	FALSE	FALSE
chr11	95067473	95067591	SRSF8	618	0	1	0	FALSE	FALSE	FALSE	TRUE	FALSE	FALSE	FALSE	FALSE	FALSE	FALSE	FALSE	FALSE
chr11	95067739	95068908	SRSF8	1409	1	0	0	FALSE	FALSE	FALSE	TRUE	FALSE	FALSE	FALSE	FALSE	FALSE	FALSE	FALSE	FALSE
chr11	95089741	95090141	ENDOD1	0	0	0	1	FALSE	FALSE	FALSE	FALSE	TRUE	FALSE	FALSE	FALSE	FALSE	FALSE	FALSE	FALSE
chr11	95090133	95090251	ENDOD1	383	0	1	0	FALSE	FALSE	TRUE	FALSE	FALSE	FALSE	FALSE	FALSE	FALSE	FALSE	FALSE	FALSE
chr11	95790076	95790476	FAM76B	0	0	0	1	FALSE	FALSE	FALSE	TRUE	TRUE	TRUE	FALSE	FALSE	FALSE	TRUE	FALSE	FALSE
chr11	95790401	95790801	CEP57	0	0	0	1	FALSE	FALSE	FALSE	TRUE	TRUE	TRUE	FALSE	FALSE	FALSE	TRUE	FALSE	FALSE
chr11	95791036	95791154	CEP57	635	0	1	0	FALSE	FALSE	FALSE	FALSE	TRUE	FALSE	FALSE	FALSE	FALSE	FALSE	FALSE	FALSE
chr11	95923236	95924207	MTMR2	37	1	0	0	FALSE	FALSE	FALSE	TRUE	TRUE	FALSE	FALSE	FALSE	FALSE	FALSE	FALSE	FALSE
chr11	9612904	9614784	WEE1	39158	1	0	0	TRUE	FALSE	FALSE	FALSE	FALSE	FALSE	TRUE	FALSE	FALSE	FALSE	FALSE	FALSE
chr11	9615084	9615442	WEE1	40577	1	0	0	TRUE	FALSE	FALSE	FALSE	FALSE	FALSE	TRUE	FALSE	FALSE	FALSE	FALSE	FALSE
chr11	9758292	9759533	SBF2-AS1	620	1	0	0	TRUE	FALSE	FALSE	FALSE	FALSE	FALSE	TRUE	FALSE	FALSE	FALSE	FALSE	FALSE
chr11	99015992	99016110	CNTN5	-4852	0	1	0	TRUE	FALSE	FALSE	FALSE	FALSE	FALSE	FALSE	FALSE	FALSE	FALSE	FALSE	FALSE
chr12	100141416	100142864	UHRF1BP1L	684	1	0	0	FALSE	FALSE	FALSE	TRUE	FALSE	FALSE	FALSE	FALSE	FALSE	FALSE	FALSE	FALSE
chr12	100573629	100573747	GAS2L3	-2	0	1	0	TRUE	FALSE	FALSE	FALSE	FALSE	FALSE	FALSE	FALSE	FALSE	FALSE	FALSE	FALSE
chr12	101407705	101407823	ARL1	56	0	1	0	FALSE	FALSE	FALSE	TRUE	TRUE	TRUE	FALSE	FALSE	FALSE	FALSE	FALSE	FALSE
chr12	102879332	102879450	PAH	37854	0	1	0	FALSE	FALSE	FALSE	TRUE	FALSE	FALSE	FALSE	FALSE	FALSE	FALSE	FALSE	FALSE
chr12	103575434	103575552	STAB2	-11756	0	1	0	FALSE	FALSE	FALSE	TRUE	FALSE	FALSE	FALSE	FALSE	FALSE	FALSE	FALSE	FALSE
chr12	103758791	103758909	NT5DC3	43551	0	1	0	FALSE	FALSE	FALSE	FALSE	FALSE	TRUE	FALSE	FALSE	FALSE	FALSE	FALSE	FALSE
chr12	103840927	103841327	NT5DC3	0	0	0	1	TRUE	FALSE	FALSE	FALSE	FALSE	FALSE	FALSE	FALSE	FALSE	FALSE	FALSE	FALSE
chr12	103965947	103966065	TDG	52	0	1	0	TRUE	FALSE	FALSE	FALSE	FALSE	FALSE	TRUE	FALSE	FALSE	FALSE	FALSE	FALSE
chr12	104286937	104287337	TXNRD1	0	0	0	1	FALSE	FALSE	TRUE	FALSE	FALSE	FALSE	FALSE	FALSE	FALSE	FALSE	FALSE	FALSE
chr12	105205847	105205965	LOC105369953	6983	0	1	0	TRUE	FALSE	FALSE	FALSE	FALSE	FALSE	FALSE	FALSE	FALSE	FALSE	FALSE	FALSE
chr12	105235224	105236230	APPL2	72	0	1	0	FALSE	FALSE	FALSE	TRUE	FALSE	FALSE	FALSE	FALSE	FALSE	FALSE	FALSE	FALSE
chr12	105425503	105425621	LOC105369955	-1222	0	1	0	FALSE	FALSE	FALSE	FALSE	FALSE	TRUE	FALSE	FALSE	FALSE	FALSE	FALSE	FALSE
chr12	106137731	106138044	NUAK1	2146	1	0	0	TRUE	FALSE	FALSE	FALSE	FALSE	FALSE	TRUE	FALSE	FALSE	FALSE	FALSE	FALSE
chr12	106138302	106140033	NUAK1	866	1	0	0	TRUE	FALSE	FALSE	FALSE	FALSE	FALSE	TRUE	FALSE	FALSE	FALSE	FALSE	FALSE
chr12	106236819	106236937	CKAP4	11057	0	1	0	FALSE	FALSE	FALSE	TRUE	FALSE	FALSE	FALSE	FALSE	FALSE	FALSE	FALSE	FALSE
chr12	106302790	106303733	TCP11L2	10	0	1	0	FALSE	FALSE	FALSE	FALSE	TRUE	FALSE	FALSE	FALSE	FALSE	FALSE	FALSE	FALSE
chr12	106357868	106357986	POLR3B	-154	0	1	0	FALSE	FALSE	FALSE	TRUE	TRUE	TRUE	FALSE	FALSE	FALSE	TRUE	TRUE	FALSE
chr12	107093726	107093844	CRY1	72	0	1	0	FALSE	FALSE	FALSE	TRUE	FALSE	FALSE	FALSE	FALSE	FALSE	FALSE	FALSE	FALSE
chr12	107685690	107686090	PWP1	0	0	0	1	FALSE	FALSE	FALSE	TRUE	TRUE	FALSE	FALSE	FALSE	FALSE	TRUE	FALSE	FALSE
chr12	107760830	107761230	PRDM4	0	0	0	1	FALSE	FALSE	FALSE	TRUE	TRUE	FALSE	FALSE	FALSE	FALSE	TRUE	FALSE	FALSE
chr12	108512069	108512187	FICD	-3145	0	1	0	FALSE	FALSE	FALSE	TRUE	TRUE	FALSE	FALSE	FALSE	FALSE	FALSE	FALSE	FALSE
chr12	108514939	108515057	FICD	-275	0	1	0	FALSE	FALSE	FALSE	TRUE	FALSE	FALSE	FALSE	FALSE	FALSE	FALSE	FALSE	FALSE
chr12	108515190	108515590	FICD	0	0	0	1	TRUE	FALSE	FALSE	FALSE	FALSE	FALSE	FALSE	FALSE	FALSE	FALSE	FALSE	FALSE
chr12	108560869	108561269	SART3	0	0	0	1	FALSE	FALSE	TRUE	TRUE	TRUE	TRUE	FALSE	FALSE	FALSE	FALSE	TRUE	FALSE
chr12	108562392	108562510	ISCU	989	0	1	0	TRUE	FALSE	FALSE	FALSE	FALSE	FALSE	FALSE	FALSE	FALSE	FALSE	FALSE	FALSE
chr12	108562503	108562903	ISCU	0	0	0	1	FALSE	FALSE	FALSE	FALSE	TRUE	TRUE	FALSE	FALSE	FALSE	FALSE	FALSE	FALSE
chr12	108563602	108563720	ISCU	2199	0	1	0	FALSE	FALSE	FALSE	TRUE	FALSE	FALSE	FALSE	FALSE	FALSE	FALSE	FALSE	FALSE
chr12	108570885	108571003	ISCU	9482	0	1	0	TRUE	FALSE	FALSE	FALSE	FALSE	FALSE	FALSE	FALSE	FALSE	FALSE	FALSE	FALSE
chr12	108599849	108599967	TMEM119	-1790	0	1	0	TRUE	FALSE	FALSE	FALSE	FALSE	FALSE	FALSE	FALSE	FALSE	FALSE	FALSE	FALSE
chr12	109450292	109450410	UBE3B	-27058	0	1	0	FALSE	FALSE	FALSE	TRUE	FALSE	FALSE	FALSE	FALSE	FALSE	FALSE	FALSE	FALSE
chr12	109477009	109477409	KCTD10	0	0	0	1	FALSE	FALSE	FALSE	TRUE	FALSE	FALSE	FALSE	FALSE	FALSE	FALSE	FALSE	FALSE
chr12	109477534	109477934	UBE3B	0	0	0	1	FALSE	FALSE	FALSE	TRUE	FALSE	FALSE	FALSE	FALSE	FALSE	FALSE	FALSE	FALSE
chr12	109779649	109779767	FAM222A-AS1	-6221	0	1	0	TRUE	FALSE	FALSE	TRUE	FALSE	FALSE	FALSE	FALSE	FALSE	FALSE	FALSE	FALSE
chr12	109833089	109833489	TRPV4	0	0	0	1	FALSE	FALSE	FALSE	TRUE	FALSE	FALSE	FALSE	FALSE	FALSE	FALSE	FALSE	FALSE
chr12	109845421	109845539	LOC105369975	-2107	0	1	0	TRUE	FALSE	FALSE	FALSE	FALSE	FALSE	FALSE	FALSE	FALSE	FALSE	FALSE	FALSE
chr12	109915385	109915503	TCHP	14874	0	1	0	FALSE	FALSE	FALSE	TRUE	FALSE	FALSE	FALSE	FALSE	FALSE	FALSE	FALSE	FALSE
chr12	110614033	110614433	TCTN1	0	0	0	1	FALSE	FALSE	TRUE	FALSE	FALSE	FALSE	FALSE	FALSE	FALSE	FALSE	FALSE	FALSE
chr12	110649277	110649395	TCTN1	35014	0	1	0	FALSE	FALSE	FALSE	FALSE	TRUE	FALSE	FALSE	FALSE	FALSE	FALSE	FALSE	FALSE
chr12	110741395	110742171	PPP1CC	1116	1	0	0	FALSE	FALSE	FALSE	TRUE	FALSE	FALSE	FALSE	FALSE	FALSE	FALSE	FALSE	FALSE
chr12	110742194	110742978	PPP1CC	313	1	0	0	TRUE	FALSE	FALSE	TRUE	FALSE	FALSE	FALSE	FALSE	FALSE	FALSE	FALSE	FALSE
chr12	110937197	110937315	LINC01405	655	0	1	0	FALSE	FALSE	FALSE	FALSE	FALSE	TRUE	FALSE	FALSE	FALSE	FALSE	FALSE	FALSE
chr12	111298957	111299075	MIR6760	-5125	0	1	0	TRUE	FALSE	FALSE	FALSE	FALSE	FALSE	FALSE	FALSE	FALSE	FALSE	FALSE	FALSE
chr12	111313892	111314010	LOC105369983	1533	0	1	0	TRUE	FALSE	FALSE	FALSE	FALSE	FALSE	FALSE	FALSE	FALSE	FALSE	FALSE	FALSE
chr12	111327638	111327756	LOC105369983	-7535	0	1	0	TRUE	FALSE	FALSE	FALSE	FALSE	FALSE	FALSE	FALSE	FALSE	FALSE	FALSE	FALSE
chr12	111597048	111599673	ATXN2	1313	1	0	0	TRUE	FALSE	FALSE	FALSE	FALSE	TRUE	FALSE	FALSE	FALSE	FALSE	FALSE	FALSE
chr12	111685910	111686028	BRAP	-3	0	1	0	FALSE	FALSE	FALSE	TRUE	TRUE	FALSE	FALSE	FALSE	FALSE	TRUE	TRUE	FALSE
chr12	112418806	112419206	PTPN11	0	0	0	1	FALSE	FALSE	FALSE	TRUE	FALSE	FALSE	FALSE	FALSE	FALSE	FALSE	FALSE	FALSE
chr12	112473199	112473317	PTPN11	54305	0	1	0	FALSE	FALSE	FALSE	TRUE	FALSE	FALSE	FALSE	FALSE	FALSE	FALSE	FALSE	FALSE
chr12	113056439	113056856	DTX1	-63	1	0	0	TRUE	FALSE	FALSE	FALSE	FALSE	FALSE	FALSE	FALSE	FALSE	FALSE	FALSE	FALSE
chr12	113185171	113185571	DDX54	0	0	0	1	TRUE	FALSE	TRUE	TRUE	TRUE	TRUE	FALSE	FALSE	FALSE	FALSE	FALSE	FALSE
chr12	113185608	113185726	RITA1	122	0	1	0	FALSE	FALSE	FALSE	TRUE	FALSE	TRUE	FALSE	FALSE	FALSE	TRUE	FALSE	FALSE
chr12	113195149	113195267	RITA1	9663	0	1	0	FALSE	FALSE	FALSE	TRUE	FALSE	FALSE	FALSE	FALSE	FALSE	FALSE	FALSE	FALSE
chr12	113221375	113221775	TPCN1	0	0	0	1	FALSE	FALSE	FALSE	TRUE	FALSE	FALSE	FALSE	FALSE	FALSE	FALSE	FALSE	FALSE
chr12	113921616	113921734	RBM19	44696	0	1	0	FALSE	FALSE	TRUE	FALSE	FALSE	FALSE	FALSE	FALSE	FALSE	FALSE	FALSE	FALSE
chr12	113966445	113966563	RBM19	-133	0	1	0	FALSE	FALSE	FALSE	TRUE	TRUE	TRUE	FALSE	FALSE	FALSE	FALSE	FALSE	FALSE
chr12	113996054	113996172	LOC105369993	-15145	0	1	0	TRUE	FALSE	FALSE	FALSE	FALSE	FALSE	FALSE	FALSE	FALSE	FALSE	FALSE	FALSE
chr12	114508660	114508778	LOC105369998	-60047	0	1	0	TRUE	FALSE	FALSE	FALSE	FALSE	FALSE	FALSE	FALSE	FALSE	FALSE	FALSE	FALSE
chr12	114625322	114625440	LOC105370000	-57139	0	1	0	FALSE	TRUE	TRUE	FALSE	FALSE	FALSE	FALSE	FALSE	FALSE	FALSE	FALSE	FALSE
chr12	11486694	11486812	LOC440084	-49983	0	1	0	TRUE	FALSE	FALSE	FALSE	FALSE	FALSE	FALSE	FALSE	FALSE	FALSE	FALSE	FALSE
chr12	115898820	115898938	LOC105370004	-12609	0	1	0	TRUE	FALSE	FALSE	FALSE	FALSE	FALSE	FALSE	FALSE	FALSE	FALSE	FALSE	FALSE
chr12	115947259	115947377	LOC105370004	-61048	0	1	0	FALSE	FALSE	FALSE	FALSE	TRUE	FALSE	FALSE	FALSE	FALSE	FALSE	FALSE	FALSE
chr12	115949846	115949964	LOC105370004	-63635	0	1	0	FALSE	FALSE	FALSE	TRUE	TRUE	FALSE	FALSE	FALSE	FALSE	FALSE	FALSE	FALSE
chr12	115952196	115952314	LOC105370004	-65985	0	1	0	TRUE	FALSE	FALSE	FALSE	FALSE	FALSE	FALSE	FALSE	FALSE	FALSE	FALSE	FALSE
chr12	116352386	116352609	LOC105370005	-1770	1	0	0	TRUE	FALSE	FALSE	TRUE	FALSE	FALSE	FALSE	FALSE	FALSE	FALSE	FALSE	FALSE
chr12	116352710	116352955	LOC105370005	-2105	1	0	0	TRUE	FALSE	FALSE	TRUE	FALSE	FALSE	FALSE	FALSE	FALSE	FALSE	FALSE	FALSE
chr12	116354971	116355669	LOC105370005	-4593	1	0	0	TRUE	FALSE	FALSE	FALSE	FALSE	FALSE	FALSE	FALSE	FALSE	FALSE	FALSE	FALSE
chr12	116818278	116819827	HRK	62371	1	0	0	TRUE	FALSE	FALSE	FALSE	FALSE	FALSE	FALSE	FALSE	FALSE	FALSE	FALSE	FALSE
chr12	117119851	117119969	LOC105370010	1127	0	1	0	TRUE	FALSE	FALSE	FALSE	TRUE	FALSE	FALSE	FALSE	FALSE	FALSE	FALSE	FALSE
chr12	117155374	117155492	FBXO21	33355	0	1	0	TRUE	FALSE	FALSE	FALSE	FALSE	FALSE	FALSE	FALSE	FALSE	FALSE	FALSE	FALSE
chr12	117190175	117190575	FBXO21	0	0	0	1	FALSE	FALSE	FALSE	TRUE	TRUE	TRUE	FALSE	FALSE	FALSE	FALSE	FALSE	FALSE
chr12	117190467	117190585	FBXO21	-26	0	1	0	FALSE	FALSE	FALSE	FALSE	FALSE	TRUE	FALSE	FALSE	FALSE	FALSE	FALSE	FALSE
chr12	118016596	118016714	RFC5	-45	0	1	0	FALSE	FALSE	FALSE	TRUE	TRUE	TRUE	FALSE	FALSE	FALSE	FALSE	FALSE	FALSE
chr12	118016637	118017037	RFC5	0	0	0	1	FALSE	FALSE	TRUE	FALSE	TRUE	FALSE	FALSE	FALSE	FALSE	FALSE	FALSE	FALSE
chr12	118052498	118052616	WSB2	8654	0	1	0	TRUE	FALSE	FALSE	FALSE	FALSE	FALSE	FALSE	FALSE	FALSE	FALSE	FALSE	FALSE
chr12	118376552	118377046	SUDS3	71	1	0	0	FALSE	FALSE	TRUE	FALSE	FALSE	FALSE	FALSE	FALSE	FALSE	FALSE	FALSE	FALSE
chr12	118377417	118377660	SUDS3	810	1	0	0	TRUE	FALSE	FALSE	FALSE	FALSE	FALSE	FALSE	FALSE	FALSE	FALSE	FALSE	FALSE
chr12	118378025	118378143	SUDS3	1356	0	1	0	TRUE	FALSE	FALSE	FALSE	FALSE	FALSE	FALSE	FALSE	FALSE	FALSE	FALSE	FALSE
chr12	118436150	118436268	SUDS3	54610	0	1	0	TRUE	FALSE	FALSE	FALSE	FALSE	FALSE	FALSE	FALSE	FALSE	FALSE	FALSE	FALSE
chr12	119876981	119877381	CIT	0	0	0	1	FALSE	FALSE	FALSE	TRUE	TRUE	TRUE	FALSE	FALSE	FALSE	FALSE	TRUE	TRUE
chr12	120087008	120087126	RAB35	29674	0	1	0	TRUE	TRUE	FALSE	FALSE	FALSE	FALSE	FALSE	FALSE	FALSE	FALSE	FALSE	FALSE
chr12	120094031	120094149	RAB35	22651	0	1	0	FALSE	FALSE	FALSE	TRUE	FALSE	FALSE	FALSE	FALSE	FALSE	FALSE	FALSE	FALSE
chr12	12011497	12011615	BCL2L14	-38287	0	1	0	TRUE	FALSE	FALSE	FALSE	FALSE	FALSE	FALSE	FALSE	FALSE	FALSE	FALSE	FALSE
chr12	120116455	120116855	RAB35	0	0	0	1	FALSE	FALSE	FALSE	TRUE	TRUE	TRUE	FALSE	FALSE	FALSE	TRUE	TRUE	FALSE
chr12	120194753	120194871	GCN1	-102	0	1	0	FALSE	FALSE	FALSE	TRUE	FALSE	FALSE	FALSE	FALSE	FALSE	FALSE	FALSE	FALSE
chr12	120200807	120201207	RPLP0	0	0	0	1	FALSE	FALSE	FALSE	TRUE	TRUE	FALSE	FALSE	FALSE	FALSE	TRUE	TRUE	FALSE
chr12	120201285	120201403	PXN-AS1	54	0	1	0	FALSE	FALSE	FALSE	TRUE	TRUE	TRUE	FALSE	FALSE	FALSE	FALSE	FALSE	FALSE
chr12	120228459	120228577	PXN	-1674	0	1	0	FALSE	FALSE	FALSE	FALSE	TRUE	FALSE	FALSE	FALSE	FALSE	FALSE	FALSE	FALSE
chr12	120265432	120265832	PXN	0	0	0	1	TRUE	FALSE	FALSE	FALSE	FALSE	FALSE	FALSE	FALSE	FALSE	FALSE	FALSE	FALSE
chr12	120367735	120369180	MSI1	394	1	0	0	TRUE	FALSE	FALSE	FALSE	FALSE	FALSE	TRUE	FALSE	FALSE	FALSE	FALSE	FALSE
chr12	120710434	120711767	UNC119B	666	1	0	0	TRUE	FALSE	FALSE	FALSE	FALSE	FALSE	TRUE	FALSE	FALSE	FALSE	FALSE	FALSE
chr12	121026002	121027058	C12orf43	-10028	1	0	0	FALSE	FALSE	FALSE	TRUE	FALSE	FALSE	FALSE	FALSE	FALSE	FALSE	FALSE	FALSE
chr12	121794688	121795402	RHOF	-1357	1	0	0	FALSE	FALSE	TRUE	FALSE	FALSE	FALSE	FALSE	FALSE	FALSE	FALSE	FALSE	FALSE
chr12	121799386	121801227	LINC01089	3178	1	0	0	FALSE	FALSE	TRUE	TRUE	FALSE	FALSE	FALSE	FALSE	FALSE	FALSE	FALSE	FALSE
chr12	122078651	122079051	MLXIP	0	0	0	1	FALSE	FALSE	FALSE	TRUE	FALSE	FALSE	FALSE	FALSE	FALSE	FALSE	FALSE	FALSE
chr12	122203648	122204048	B3GNT4	0	0	0	1	FALSE	TRUE	FALSE	FALSE	FALSE	FALSE	FALSE	FALSE	FALSE	FALSE	FALSE	FALSE
chr12	122500882	122501000	ZCCHC8	48	0	1	0	FALSE	FALSE	TRUE	TRUE	FALSE	FALSE	FALSE	FALSE	FALSE	FALSE	FALSE	FALSE
chr12	122752619	122752737	DENR	-142	0	1	0	FALSE	FALSE	FALSE	TRUE	TRUE	FALSE	FALSE	FALSE	FALSE	TRUE	FALSE	FALSE
chr12	122752820	122753584	DENR	382	1	0	0	FALSE	FALSE	FALSE	TRUE	TRUE	FALSE	FALSE	FALSE	FALSE	TRUE	FALSE	FALSE
chr12	122852480	122852598	HIP1R	17102	0	1	0	FALSE	FALSE	TRUE	FALSE	FALSE	FALSE	FALSE	FALSE	FALSE	FALSE	FALSE	FALSE
chr12	122853868	122853986	VPS37B	18035	0	1	0	TRUE	FALSE	FALSE	FALSE	FALSE	FALSE	FALSE	FALSE	FALSE	FALSE	FALSE	FALSE
chr12	122965426	122966509	ABCB9	496	0	1	0	TRUE	FALSE	FALSE	FALSE	FALSE	FALSE	FALSE	FALSE	FALSE	FALSE	FALSE	FALSE
chr12	122980059	122981886	ARL6IP4	913	0	1	0	TRUE	FALSE	FALSE	FALSE	FALSE	FALSE	FALSE	FALSE	FALSE	FALSE	FALSE	FALSE
chr12	122982958	122983076	ARL6IP4	2958	0	1	0	TRUE	FALSE	FALSE	FALSE	FALSE	FALSE	FALSE	FALSE	FALSE	FALSE	FALSE	FALSE
chr12	122996778	122996896	MIR4304	13891	0	1	0	FALSE	FALSE	FALSE	TRUE	FALSE	FALSE	FALSE	FALSE	FALSE	FALSE	FALSE	FALSE
chr12	123232824	123233224	MPHOSPH9	0	0	0	1	FALSE	FALSE	FALSE	FALSE	TRUE	FALSE	FALSE	FALSE	FALSE	FALSE	FALSE	FALSE
chr12	123233360	123233760	C12orf65	0	0	0	1	FALSE	FALSE	FALSE	FALSE	TRUE	FALSE	FALSE	FALSE	FALSE	FALSE	FALSE	FALSE
chr12	123458050	123458450	SNRNP35	0	0	0	1	FALSE	FALSE	FALSE	TRUE	FALSE	FALSE	FALSE	FALSE	FALSE	FALSE	FALSE	FALSE
chr12	123458103	123458703	SNRNP35	274	1	0	0	FALSE	FALSE	FALSE	TRUE	TRUE	FALSE	FALSE	FALSE	FALSE	FALSE	FALSE	FALSE
chr12	123633718	123633836	EIF2B1	-1	0	1	0	FALSE	FALSE	FALSE	TRUE	TRUE	FALSE	FALSE	FALSE	FALSE	FALSE	TRUE	FALSE
chr12	123712698	123712816	ATP6V0A2	440	0	1	0	TRUE	FALSE	FALSE	FALSE	FALSE	TRUE	FALSE	FALSE	FALSE	FALSE	FALSE	FALSE
chr12	124320987	124321105	MIR6880	16196	0	1	0	TRUE	FALSE	FALSE	FALSE	FALSE	FALSE	FALSE	FALSE	FALSE	FALSE	FALSE	FALSE
chr12	124322304	124322422	MIR6880	14879	0	1	0	TRUE	FALSE	FALSE	FALSE	FALSE	FALSE	FALSE	FALSE	FALSE	FALSE	FALSE	FALSE
chr12	124333150	124333268	MIR6880	4033	0	1	0	FALSE	FALSE	FALSE	TRUE	FALSE	FALSE	FALSE	FALSE	FALSE	FALSE	FALSE	FALSE
chr12	124335449	124335567	MIR6880	1734	0	1	0	FALSE	FALSE	FALSE	TRUE	FALSE	FALSE	FALSE	FALSE	FALSE	FALSE	FALSE	FALSE
chr12	124348077	124348195	MIR6880	-10894	0	1	0	FALSE	FALSE	TRUE	FALSE	FALSE	FALSE	FALSE	FALSE	FALSE	FALSE	FALSE	FALSE
chr12	124375564	124375682	MIR6880	-38381	0	1	0	FALSE	FALSE	FALSE	FALSE	TRUE	FALSE	FALSE	FALSE	FALSE	FALSE	FALSE	FALSE
chr12	124379659	124380900	MIR6880	-43037	0	1	0	FALSE	FALSE	FALSE	TRUE	FALSE	FALSE	FALSE	FALSE	FALSE	FALSE	FALSE	FALSE
chr12	124385177	124385855	MIR6880	-48274	0	1	0	TRUE	FALSE	FALSE	FALSE	FALSE	FALSE	FALSE	FALSE	FALSE	FALSE	FALSE	FALSE
chr12	124386038	124386445	MIR6880	-48999	1	0	0	TRUE	FALSE	FALSE	FALSE	FALSE	FALSE	FALSE	FALSE	FALSE	FALSE	FALSE	FALSE
chr12	124387485	124387941	MIR6880	-50471	1	0	0	TRUE	FALSE	FALSE	FALSE	FALSE	FALSE	FALSE	FALSE	FALSE	FALSE	FALSE	FALSE
chr12	124388471	124390108	MIR6880	-52047	0	1	0	TRUE	FALSE	FALSE	TRUE	FALSE	TRUE	FALSE	FALSE	FALSE	TRUE	FALSE	FALSE
chr12	124390611	124392703	MIR6880	-54415	0	1	0	FALSE	FALSE	FALSE	TRUE	FALSE	FALSE	FALSE	FALSE	FALSE	FALSE	FALSE	FALSE
chr12	124392771	124393678	MIR6880	-55982	1	0	0	FALSE	FALSE	FALSE	TRUE	FALSE	FALSE	FALSE	FALSE	FALSE	FALSE	FALSE	FALSE
chr12	124395165	124395753	MIR6880	-58217	0	1	0	FALSE	FALSE	FALSE	TRUE	FALSE	FALSE	FALSE	FALSE	FALSE	FALSE	FALSE	FALSE
chr12	12464947	12465977	LOC107984485	-6322	1	0	0	TRUE	FALSE	TRUE	TRUE	FALSE	FALSE	FALSE	FALSE	FALSE	FALSE	FALSE	FALSE
chr12	124754862	124755986	SCARB1	108549	1	0	0	TRUE	FALSE	FALSE	TRUE	FALSE	FALSE	TRUE	FALSE	FALSE	FALSE	FALSE	FALSE
chr12	124756225	124756555	SCARB1	107583	1	0	0	TRUE	FALSE	FALSE	FALSE	FALSE	FALSE	FALSE	FALSE	FALSE	FALSE	FALSE	FALSE
chr12	124913644	124914546	UBC	946	0	1	0	TRUE	FALSE	FALSE	FALSE	FALSE	FALSE	FALSE	FALSE	FALSE	FALSE	FALSE	FALSE
chr12	124927664	124927782	MIR5188	12177	0	1	0	FALSE	FALSE	FALSE	TRUE	TRUE	FALSE	FALSE	FALSE	FALSE	FALSE	FALSE	FALSE
chr12	124988797	124989197	DHX37	0	0	0	1	FALSE	FALSE	FALSE	TRUE	TRUE	TRUE	FALSE	FALSE	FALSE	TRUE	FALSE	FALSE
chr12	125065338	125065738	AACS	0	0	0	1	FALSE	FALSE	FALSE	TRUE	FALSE	FALSE	FALSE	FALSE	FALSE	FALSE	FALSE	FALSE
chr12	125118660	125118778	LOC105370053	-32631	0	1	0	TRUE	FALSE	FALSE	FALSE	FALSE	FALSE	FALSE	FALSE	FALSE	FALSE	FALSE	FALSE
chr12	12717275	12717675	CDKN1B	0	0	0	1	TRUE	FALSE	TRUE	FALSE	FALSE	FALSE	FALSE	FALSE	TRUE	FALSE	FALSE	FALSE
chr12	12720663	12720781	LOC105369663	3319	0	1	0	TRUE	FALSE	FALSE	FALSE	FALSE	FALSE	FALSE	FALSE	FALSE	FALSE	FALSE	FALSE
chr12	12720983	12721447	LOC105369663	2826	1	0	0	TRUE	FALSE	FALSE	FALSE	FALSE	FALSE	FALSE	FALSE	FALSE	FALSE	FALSE	FALSE
chr12	12723734	12724916	LOC105369663	-284	1	0	0	TRUE	FALSE	FALSE	TRUE	FALSE	FALSE	FALSE	FALSE	FALSE	FALSE	FALSE	FALSE
chr12	12725132	12725250	APOLD1	-725	0	1	0	FALSE	FALSE	FALSE	TRUE	FALSE	FALSE	FALSE	FALSE	FALSE	FALSE	FALSE	FALSE
chr12	12786367	12787750	APOLD1	1452	1	0	0	FALSE	FALSE	FALSE	FALSE	FALSE	TRUE	FALSE	FALSE	FALSE	FALSE	FALSE	FALSE
chr12	12891463	12891863	GPRC5A	0	0	0	1	FALSE	FALSE	FALSE	FALSE	TRUE	FALSE	FALSE	FALSE	FALSE	FALSE	FALSE	FALSE
chr12	130049807	130049925	LOC100190940	-7524	0	1	0	TRUE	FALSE	FALSE	FALSE	FALSE	FALSE	FALSE	FALSE	FALSE	FALSE	FALSE	FALSE
chr12	130752754	130752872	LOC105370080	-4153	0	1	0	TRUE	FALSE	FALSE	FALSE	FALSE	FALSE	FALSE	FALSE	FALSE	FALSE	FALSE	FALSE
chr12	130813518	130813636	STX2	-555	0	1	0	TRUE	FALSE	FALSE	FALSE	FALSE	FALSE	FALSE	FALSE	FALSE	FALSE	FALSE	FALSE
chr12	130838942	130839342	STX2	0	0	0	1	FALSE	FALSE	FALSE	TRUE	TRUE	FALSE	FALSE	FALSE	FALSE	FALSE	FALSE	FALSE
chr12	131011446	131011696	ADGRD1	8184	1	0	0	TRUE	FALSE	FALSE	FALSE	FALSE	FALSE	FALSE	FALSE	FALSE	FALSE	FALSE	FALSE
chr12	131894733	131897302	ULK1	1061	1	0	0	TRUE	FALSE	FALSE	FALSE	FALSE	FALSE	FALSE	FALSE	FALSE	FALSE	FALSE	FALSE
chr12	131949852	131950252	EP400	0	0	0	1	FALSE	FALSE	FALSE	TRUE	FALSE	FALSE	FALSE	FALSE	FALSE	FALSE	FALSE	FALSE
chr12	132064815	132064933	EP400NL	-19408	0	1	0	FALSE	FALSE	FALSE	TRUE	FALSE	FALSE	FALSE	FALSE	FALSE	FALSE	FALSE	FALSE
chr12	132065315	132065433	EP400NL	-18908	0	1	0	FALSE	FALSE	FALSE	TRUE	FALSE	FALSE	FALSE	FALSE	FALSE	FALSE	FALSE	FALSE
chr12	132083878	132083996	EP400NL	-345	0	1	0	TRUE	FALSE	FALSE	TRUE	TRUE	FALSE	FALSE	FALSE	FALSE	FALSE	FALSE	FALSE
chr12	132134086	132134204	DDX51	10190	0	1	0	TRUE	FALSE	FALSE	FALSE	FALSE	FALSE	FALSE	FALSE	FALSE	FALSE	FALSE	FALSE
chr12	132143702	132143820	DDX51	574	0	1	0	FALSE	FALSE	FALSE	FALSE	TRUE	TRUE	FALSE	FALSE	FALSE	FALSE	FALSE	FALSE
chr12	132144023	132144423	DDX51	0	0	0	1	FALSE	FALSE	FALSE	TRUE	TRUE	FALSE	FALSE	FALSE	FALSE	FALSE	FALSE	FALSE
chr12	132144350	132144750	NOC4L	0	0	0	1	FALSE	FALSE	FALSE	TRUE	TRUE	FALSE	FALSE	FALSE	FALSE	FALSE	FALSE	FALSE
chr12	132144483	132144601	NOC4L	116	0	1	0	TRUE	FALSE	FALSE	TRUE	TRUE	FALSE	FALSE	FALSE	FALSE	FALSE	FALSE	FALSE
chr12	132167576	132167694	LOC105370090	-3117	0	1	0	FALSE	FALSE	FALSE	FALSE	TRUE	FALSE	FALSE	FALSE	FALSE	FALSE	FALSE	FALSE
chr12	132189138	132189256	LOC100996246	502	0	1	0	TRUE	FALSE	FALSE	FALSE	FALSE	FALSE	FALSE	FALSE	FALSE	FALSE	FALSE	FALSE
chr12	132622296	132623850	P2RX2	4278	1	0	0	FALSE	TRUE	FALSE	FALSE	FALSE	FALSE	FALSE	FALSE	FALSE	FALSE	FALSE	FALSE
chr12	132687053	132687453	POLE	0	0	0	1	FALSE	FALSE	FALSE	TRUE	TRUE	FALSE	FALSE	FALSE	FALSE	FALSE	FALSE	FALSE
chr12	132954654	132956282	ZNF605	814	1	0	0	TRUE	FALSE	FALSE	FALSE	FALSE	FALSE	FALSE	FALSE	FALSE	FALSE	FALSE	FALSE
chr12	13386240	13386657	LINC01559	-9703	1	0	0	TRUE	FALSE	FALSE	FALSE	FALSE	FALSE	FALSE	FALSE	FALSE	FALSE	FALSE	FALSE
chr12	13386736	13386940	LINC01559	-10093	1	0	0	TRUE	FALSE	FALSE	FALSE	FALSE	FALSE	FALSE	FALSE	FALSE	FALSE	FALSE	FALSE
chr12	14774661	14774779	H2AFJ	385	0	1	0	FALSE	TRUE	FALSE	FALSE	FALSE	FALSE	FALSE	FALSE	FALSE	FALSE	FALSE	FALSE
chr12	14803575	14803975	C12orf60	0	0	0	1	FALSE	FALSE	FALSE	TRUE	TRUE	TRUE	FALSE	FALSE	FALSE	TRUE	FALSE	FALSE
chr12	1583606	1583724	FBXL14	10500	0	1	0	TRUE	FALSE	FALSE	FALSE	FALSE	FALSE	FALSE	FALSE	FALSE	FALSE	FALSE	FALSE
chr12	1593464	1593582	FBXL14	642	0	1	0	TRUE	FALSE	FALSE	FALSE	FALSE	FALSE	FALSE	FALSE	FALSE	FALSE	FALSE	FALSE
chr12	1594256	1594656	FBXL14	0	0	0	1	TRUE	FALSE	FALSE	TRUE	FALSE	FALSE	TRUE	FALSE	FALSE	FALSE	FALSE	FALSE
chr12	15979249	15979367	DERA	68137	0	1	0	TRUE	FALSE	FALSE	FALSE	FALSE	FALSE	FALSE	FALSE	FALSE	FALSE	FALSE	FALSE
chr12	1630093	1630211	WNT5B	907	0	1	0	TRUE	FALSE	FALSE	TRUE	FALSE	FALSE	FALSE	FALSE	FALSE	FALSE	FALSE	FALSE
chr12	1640626	1640744	WNT5B	11440	0	1	0	TRUE	FALSE	FALSE	FALSE	FALSE	FALSE	FALSE	FALSE	FALSE	FALSE	FALSE	FALSE
chr12	1795809	1796735	LOC105369602	-4343	1	0	0	TRUE	FALSE	TRUE	FALSE	FALSE	FALSE	FALSE	FALSE	FALSE	FALSE	FALSE	FALSE
chr12	1796792	1798018	LOC105369602	-3210	1	0	0	TRUE	FALSE	FALSE	FALSE	FALSE	FALSE	FALSE	FALSE	FALSE	FALSE	FALSE	FALSE
chr12	1800648	1801434	LOC105369602	426	1	0	0	FALSE	FALSE	TRUE	FALSE	FALSE	FALSE	FALSE	FALSE	FALSE	FALSE	FALSE	FALSE
chr12	1801644	1801911	LOC105369602	1162	1	0	0	FALSE	FALSE	TRUE	FALSE	FALSE	FALSE	FALSE	FALSE	FALSE	FALSE	FALSE	FALSE
chr12	21437690	21437808	PYROXD1	120	0	1	0	FALSE	FALSE	FALSE	TRUE	TRUE	TRUE	FALSE	FALSE	FALSE	TRUE	TRUE	TRUE
chr12	21501295	21501695	RECQL	0	0	0	1	FALSE	FALSE	FALSE	TRUE	FALSE	FALSE	FALSE	FALSE	FALSE	FALSE	FALSE	FALSE
chr12	21501706	21502106	GOLT1B	0	0	0	1	FALSE	FALSE	FALSE	TRUE	FALSE	FALSE	FALSE	FALSE	FALSE	FALSE	FALSE	FALSE
chr12	21501710	21501828	GOLT1B	5	0	1	0	TRUE	FALSE	FALSE	FALSE	FALSE	TRUE	FALSE	FALSE	FALSE	FALSE	FALSE	FALSE
chr12	21527877	21527995	SPX	12	0	1	0	FALSE	FALSE	FALSE	TRUE	FALSE	FALSE	FALSE	FALSE	FALSE	FALSE	FALSE	FALSE
chr12	22443336	22443650	C2CD5	63263	0	1	0	TRUE	FALSE	FALSE	FALSE	FALSE	FALSE	FALSE	FALSE	FALSE	FALSE	FALSE	FALSE
chr12	22543273	22544546	C2CD5	599	0	1	0	TRUE	FALSE	FALSE	FALSE	FALSE	FALSE	FALSE	FALSE	FALSE	FALSE	FALSE	FALSE
chr12	23964968	23965086	SOX5	-13719	0	1	0	TRUE	FALSE	FALSE	FALSE	FALSE	FALSE	FALSE	FALSE	FALSE	FALSE	FALSE	FALSE
chr12	26097179	26097297	SSPN	-24785	0	1	0	TRUE	FALSE	FALSE	FALSE	FALSE	FALSE	FALSE	FALSE	FALSE	FALSE	FALSE	FALSE
chr12	26831937	26833198	ITPR2	630	1	0	0	FALSE	FALSE	FALSE	TRUE	FALSE	TRUE	FALSE	FALSE	FALSE	TRUE	FALSE	FALSE
chr12	26937698	26938098	ASUN	0	0	0	1	FALSE	FALSE	FALSE	TRUE	TRUE	TRUE	FALSE	FALSE	FALSE	TRUE	TRUE	FALSE
chr12	26938407	26938807	FGFR1OP2	0	0	0	1	FALSE	FALSE	FALSE	TRUE	TRUE	TRUE	FALSE	FALSE	FALSE	TRUE	TRUE	FALSE
chr12	27022464	27022864	MED21	0	0	0	1	FALSE	FALSE	FALSE	TRUE	TRUE	TRUE	FALSE	FALSE	FALSE	TRUE	FALSE	FALSE
chr12	27022815	27022933	MED21	353	0	1	0	FALSE	FALSE	FALSE	TRUE	TRUE	TRUE	FALSE	FALSE	FALSE	TRUE	TRUE	FALSE
chr12	27384128	27384246	ARNTL2	14045	0	1	0	FALSE	TRUE	FALSE	FALSE	FALSE	FALSE	FALSE	FALSE	FALSE	FALSE	FALSE	FALSE
chr12	27424746	27424864	SMCO2	-21676	0	1	0	TRUE	FALSE	FALSE	FALSE	FALSE	FALSE	FALSE	FALSE	FALSE	FALSE	FALSE	FALSE
chr12	27710720	27711120	MRPS35	0	0	0	1	FALSE	FALSE	FALSE	TRUE	TRUE	FALSE	FALSE	FALSE	FALSE	TRUE	TRUE	FALSE
chr12	27710995	27711113	MRPS35	282	0	1	0	FALSE	FALSE	FALSE	TRUE	TRUE	FALSE	FALSE	FALSE	FALSE	TRUE	TRUE	FALSE
chr12	2794899	2795299	FKBP4	0	0	0	1	TRUE	FALSE	FALSE	FALSE	FALSE	FALSE	FALSE	FALSE	FALSE	FALSE	FALSE	FALSE
chr12	2812621	2813832	ITFG2	530	0	1	0	FALSE	FALSE	FALSE	FALSE	FALSE	TRUE	FALSE	FALSE	FALSE	FALSE	FALSE	FALSE
chr12	29024257	29024375	LOC101928735	-16299	0	1	0	TRUE	FALSE	FALSE	FALSE	FALSE	FALSE	FALSE	FALSE	FALSE	FALSE	FALSE	FALSE
chr12	2959304	2959704	TEAD4	0	0	0	1	FALSE	FALSE	FALSE	TRUE	FALSE	FALSE	FALSE	FALSE	FALSE	FALSE	FALSE	FALSE
chr12	2981063	2981181	TEAD4	21541	0	1	0	FALSE	FALSE	FALSE	TRUE	FALSE	FALSE	FALSE	FALSE	FALSE	FALSE	FALSE	FALSE
chr12	3213103	3213764	TSPAN9	-1817	1	0	0	TRUE	FALSE	FALSE	FALSE	FALSE	FALSE	FALSE	FALSE	FALSE	FALSE	FALSE	FALSE
chr12	3216924	3217923	TSPAN9	2173	1	0	0	FALSE	FALSE	FALSE	TRUE	FALSE	FALSE	FALSE	FALSE	FALSE	FALSE	FALSE	FALSE
chr12	32398756	32400829	FGD4	-63	1	0	0	TRUE	FALSE	FALSE	FALSE	FALSE	FALSE	FALSE	FALSE	FALSE	FALSE	FALSE	FALSE
chr12	3269749	3269867	LOC105369606	-30520	0	1	0	TRUE	FALSE	FALSE	FALSE	FALSE	FALSE	FALSE	FALSE	FALSE	FALSE	FALSE	FALSE
chr12	3279200	3279318	LOC105369606	-21069	0	1	0	FALSE	FALSE	FALSE	TRUE	FALSE	FALSE	FALSE	FALSE	FALSE	FALSE	FALSE	FALSE
chr12	3293983	3294101	LOC105369606	-6286	0	1	0	FALSE	FALSE	FALSE	TRUE	TRUE	TRUE	FALSE	FALSE	FALSE	FALSE	FALSE	TRUE
chr12	3303348	3303563	LOC105369606	3127	1	0	0	TRUE	FALSE	FALSE	FALSE	FALSE	FALSE	FALSE	FALSE	FALSE	FALSE	FALSE	FALSE
chr12	3303767	3304128	LOC105369606	3619	0	1	0	TRUE	FALSE	FALSE	FALSE	FALSE	FALSE	FALSE	FALSE	FALSE	FALSE	FALSE	FALSE
chr12	3304347	3305158	LOC105369606	4424	1	0	0	TRUE	FALSE	FALSE	FALSE	FALSE	TRUE	TRUE	FALSE	FALSE	FALSE	FALSE	FALSE
chr12	3314384	3314502	LOC100128253	-3531	0	1	0	FALSE	FALSE	FALSE	TRUE	FALSE	FALSE	FALSE	FALSE	FALSE	FALSE	FALSE	FALSE
chr12	3319860	3319978	LOC100128253	-9007	0	1	0	FALSE	FALSE	FALSE	TRUE	FALSE	FALSE	FALSE	FALSE	FALSE	FALSE	FALSE	FALSE
chr12	3333746	3333864	LOC100128253	-22893	0	1	0	FALSE	FALSE	FALSE	TRUE	TRUE	FALSE	FALSE	FALSE	FALSE	FALSE	FALSE	FALSE
chr12	3334093	3334211	LOC100128253	-23240	0	1	0	FALSE	FALSE	FALSE	TRUE	TRUE	FALSE	FALSE	FALSE	FALSE	FALSE	FALSE	FALSE
chr12	42588546	42589770	PRICKLE1	125	1	0	0	TRUE	FALSE	FALSE	TRUE	FALSE	FALSE	FALSE	FALSE	FALSE	FALSE	FALSE	FALSE
chr12	4269424	4269542	CCND2	-4252	0	1	0	TRUE	FALSE	FALSE	TRUE	FALSE	FALSE	FALSE	FALSE	FALSE	FALSE	FALSE	FALSE
chr12	4272310	4272428	CCND2	-1366	0	1	0	TRUE	FALSE	FALSE	FALSE	FALSE	FALSE	FALSE	FALSE	FALSE	FALSE	FALSE	FALSE
chr12	4272916	4273034	CCND2	-760	0	1	0	TRUE	FALSE	FALSE	FALSE	FALSE	FALSE	FALSE	FALSE	FALSE	FALSE	FALSE	FALSE
chr12	4277061	4277179	CCND2-AS1	-936	0	1	0	TRUE	FALSE	FALSE	FALSE	FALSE	FALSE	FALSE	FALSE	FALSE	FALSE	FALSE	FALSE
chr12	4283154	4283272	CCND2-AS1	-7029	0	1	0	TRUE	FALSE	FALSE	FALSE	FALSE	FALSE	FALSE	FALSE	FALSE	FALSE	FALSE	FALSE
chr12	4321190	4321308	TIGAR	57	0	1	0	FALSE	FALSE	FALSE	TRUE	FALSE	FALSE	FALSE	FALSE	FALSE	FALSE	FALSE	FALSE
chr12	43835860	43836914	TMEM117	-179	1	0	0	FALSE	FALSE	FALSE	FALSE	FALSE	TRUE	FALSE	FALSE	FALSE	FALSE	FALSE	FALSE
chr12	45726864	45727921	LINC00938	529	1	0	0	TRUE	FALSE	FALSE	FALSE	FALSE	FALSE	FALSE	FALSE	FALSE	FALSE	FALSE	FALSE
chr12	45729605	45730005	ARID2	0	0	0	1	FALSE	FALSE	FALSE	TRUE	FALSE	FALSE	FALSE	FALSE	FALSE	FALSE	FALSE	FALSE
chr12	45729836	45730100	ARID2	132	1	0	0	TRUE	FALSE	TRUE	TRUE	TRUE	FALSE	FALSE	FALSE	FALSE	FALSE	FALSE	FALSE
chr12	45730149	45730895	ARID2	686	1	0	0	TRUE	FALSE	TRUE	TRUE	TRUE	FALSE	FALSE	FALSE	FALSE	FALSE	FALSE	FALSE
chr12	45989663	45990618	SCAF11	452	1	0	0	FALSE	FALSE	FALSE	TRUE	TRUE	FALSE	FALSE	FALSE	FALSE	FALSE	FALSE	FALSE
chr12	45990698	45990816	SCAF11	48	0	1	0	FALSE	FALSE	FALSE	TRUE	TRUE	FALSE	FALSE	FALSE	FALSE	FALSE	FALSE	FALSE
chr12	46371025	46372862	LOC102723757	-839	1	0	0	FALSE	FALSE	FALSE	TRUE	TRUE	FALSE	FALSE	FALSE	FALSE	FALSE	FALSE	FALSE
chr12	46372474	46372874	SLC38A2	0	0	0	1	TRUE	FALSE	FALSE	FALSE	FALSE	FALSE	FALSE	FALSE	FALSE	FALSE	FALSE	FALSE
chr12	47705577	47705695	LOC105369748	-422	0	1	0	FALSE	FALSE	FALSE	TRUE	TRUE	TRUE	FALSE	FALSE	FALSE	TRUE	TRUE	FALSE
chr12	47705716	47706116	RPAP3	0	0	0	1	FALSE	FALSE	FALSE	TRUE	TRUE	TRUE	FALSE	FALSE	FALSE	FALSE	FALSE	FALSE
chr12	47818860	47818978	HDAC7	343	0	1	0	FALSE	FALSE	FALSE	FALSE	FALSE	TRUE	FALSE	FALSE	FALSE	FALSE	FALSE	FALSE
chr12	47819589	47819989	HDAC7	0	0	0	1	FALSE	FALSE	FALSE	TRUE	FALSE	FALSE	FALSE	FALSE	FALSE	FALSE	FALSE	FALSE
chr12	48788751	48789151	ADCY6	0	0	0	1	FALSE	FALSE	FALSE	TRUE	FALSE	FALSE	FALSE	FALSE	FALSE	FALSE	FALSE	FALSE
chr12	48818261	48818379	CACNB3	-150	0	1	0	FALSE	TRUE	FALSE	FALSE	FALSE	FALSE	FALSE	FALSE	FALSE	FALSE	FALSE	FALSE
chr12	48864970	48865870	RND1	450	1	0	0	TRUE	FALSE	FALSE	FALSE	FALSE	FALSE	TRUE	FALSE	FALSE	FALSE	FALSE	FALSE
chr12	48996786	48999141	LOC105369758	-403	1	0	0	FALSE	FALSE	FALSE	TRUE	FALSE	FALSE	FALSE	FALSE	FALSE	TRUE	FALSE	FALSE
chr12	49039858	49039976	KMT2D	15407	0	1	0	FALSE	FALSE	FALSE	TRUE	FALSE	FALSE	FALSE	FALSE	FALSE	FALSE	FALSE	FALSE
chr12	49092277	49092395	LOC105369759	276	0	1	0	TRUE	FALSE	FALSE	FALSE	FALSE	FALSE	FALSE	FALSE	FALSE	FALSE	FALSE	FALSE
chr12	49094478	49094596	DHH	282	0	1	0	FALSE	FALSE	FALSE	TRUE	TRUE	TRUE	FALSE	FALSE	FALSE	FALSE	FALSE	TRUE
chr12	49098123	49098241	DHH	-3363	0	1	0	TRUE	FALSE	FALSE	FALSE	FALSE	TRUE	FALSE	FALSE	FALSE	FALSE	FALSE	FALSE
chr12	49129900	49131521	TUBA1B	811	1	0	0	FALSE	FALSE	FALSE	TRUE	TRUE	FALSE	FALSE	FALSE	FALSE	TRUE	TRUE	FALSE
chr12	49131094	49131494	TUBA1B	0	0	0	1	FALSE	FALSE	FALSE	FALSE	TRUE	FALSE	FALSE	FALSE	FALSE	FALSE	FALSE	FALSE
chr12	49345180	49345780	DNAJC22	-1436	1	0	0	FALSE	FALSE	TRUE	FALSE	TRUE	FALSE	FALSE	FALSE	FALSE	FALSE	FALSE	FALSE
chr12	49346916	49348182	DNAJC22	-410	1	0	0	FALSE	FALSE	TRUE	TRUE	FALSE	FALSE	FALSE	FALSE	TRUE	FALSE	FALSE	FALSE
chr12	49348412	49348612	DNAJC22	553	1	0	0	FALSE	FALSE	TRUE	TRUE	FALSE	FALSE	FALSE	FALSE	FALSE	FALSE	FALSE	FALSE
chr12	49567439	49568145	MCRS1	340	1	0	0	TRUE	FALSE	FALSE	FALSE	FALSE	FALSE	FALSE	FALSE	FALSE	FALSE	FALSE	FALSE
chr12	49623587	49623705	PRPF40B	27	0	1	0	TRUE	FALSE	FALSE	FALSE	FALSE	FALSE	FALSE	FALSE	FALSE	FALSE	FALSE	FALSE
chr12	49631887	49632005	PRPF40B	-689	0	1	0	TRUE	FALSE	FALSE	FALSE	FALSE	FALSE	FALSE	FALSE	FALSE	FALSE	FALSE	FALSE
chr12	49673758	49673876	FMNL3	-3082	0	1	0	TRUE	FALSE	FALSE	FALSE	FALSE	FALSE	FALSE	FALSE	FALSE	FALSE	FALSE	FALSE
chr12	49705367	49706013	FMNL3	821	1	0	0	TRUE	FALSE	FALSE	FALSE	FALSE	FALSE	FALSE	FALSE	FALSE	FALSE	FALSE	FALSE
chr12	49706044	49707414	FMNL3	-214	1	0	0	TRUE	FALSE	TRUE	FALSE	FALSE	FALSE	FALSE	FALSE	FALSE	FALSE	FALSE	FALSE
chr12	49741456	49741856	TMBIM6	0	0	0	1	FALSE	FALSE	TRUE	FALSE	FALSE	FALSE	FALSE	FALSE	FALSE	FALSE	FALSE	FALSE
chr12	49741808	49742665	TMBIM6	428	1	0	0	TRUE	FALSE	FALSE	FALSE	FALSE	FALSE	FALSE	FALSE	FALSE	FALSE	FALSE	FALSE
chr12	49966742	49968076	LOC105369764	3146	1	0	0	TRUE	FALSE	FALSE	FALSE	FALSE	FALSE	FALSE	FALSE	FALSE	FALSE	FALSE	FALSE
chr12	50053276	50053394	ASIC1	-4301	0	1	0	TRUE	FALSE	FALSE	FALSE	FALSE	FALSE	FALSE	FALSE	FALSE	FALSE	FALSE	FALSE
chr12	50056105	50056223	ASIC1	-1472	0	1	0	FALSE	FALSE	FALSE	FALSE	TRUE	FALSE	FALSE	FALSE	FALSE	FALSE	FALSE	FALSE
chr12	50057636	50058416	ASIC1	173	1	0	0	TRUE	FALSE	FALSE	FALSE	FALSE	FALSE	FALSE	FALSE	FALSE	FALSE	FALSE	FALSE
chr12	50070620	50070738	ASIC1	-2905	0	1	0	FALSE	FALSE	FALSE	TRUE	FALSE	FALSE	FALSE	FALSE	FALSE	FALSE	FALSE	FALSE
chr12	50085199	50085994	SMARCD1	397	0	1	0	FALSE	TRUE	FALSE	TRUE	FALSE	FALSE	FALSE	FALSE	FALSE	FALSE	FALSE	FALSE
chr12	50763981	50764381	ATF1	0	0	0	1	FALSE	FALSE	FALSE	FALSE	FALSE	TRUE	FALSE	FALSE	FALSE	FALSE	FALSE	FALSE
chr12	50764005	50765375	ATF1	-104	1	0	0	TRUE	FALSE	FALSE	FALSE	FALSE	TRUE	TRUE	FALSE	FALSE	FALSE	FALSE	FALSE
chr12	50765394	50765512	ATF1	659	0	1	0	TRUE	FALSE	FALSE	FALSE	FALSE	FALSE	FALSE	FALSE	FALSE	FALSE	FALSE	FALSE
chr12	51026071	51026471	SLC11A2	0	0	0	1	FALSE	FALSE	FALSE	TRUE	FALSE	FALSE	FALSE	FALSE	FALSE	TRUE	FALSE	FALSE
chr12	51082445	51083654	CSRNP2	-422	1	0	0	TRUE	FALSE	FALSE	FALSE	FALSE	FALSE	FALSE	FALSE	FALSE	FALSE	FALSE	FALSE
chr12	51171856	51173143	TFCP2	644	1	0	0	TRUE	FALSE	TRUE	FALSE	FALSE	FALSE	FALSE	FALSE	FALSE	FALSE	FALSE	FALSE
chr12	51248016	51248222	DAZAP2	9396	1	0	0	TRUE	FALSE	FALSE	FALSE	FALSE	FALSE	FALSE	FALSE	FALSE	FALSE	FALSE	FALSE
chr12	51269896	51270296	SMAGP	0	0	0	1	TRUE	FALSE	FALSE	FALSE	FALSE	FALSE	FALSE	FALSE	FALSE	FALSE	FALSE	FALSE
chr12	51377277	51377395	GALNT6	6246	0	1	0	FALSE	TRUE	FALSE	TRUE	FALSE	FALSE	FALSE	FALSE	FALSE	FALSE	FALSE	FALSE
chr12	51387853	51388550	GALNT6	2994	1	0	0	FALSE	FALSE	TRUE	FALSE	FALSE	FALSE	FALSE	FALSE	FALSE	FALSE	FALSE	FALSE
chr12	51389309	51390030	GALNT6	1526	1	0	0	TRUE	FALSE	FALSE	FALSE	FALSE	FALSE	FALSE	FALSE	FALSE	FALSE	FALSE	FALSE
chr12	51391054	51391172	GALNT6	82	0	1	0	FALSE	FALSE	FALSE	FALSE	TRUE	FALSE	FALSE	FALSE	FALSE	FALSE	FALSE	FALSE
chr12	51391578	51391696	GALNT6	15	0	1	0	FALSE	FALSE	FALSE	FALSE	TRUE	FALSE	FALSE	FALSE	FALSE	FALSE	FALSE	FALSE
chr12	51819830	51822227	FIGNL2	10889	1	0	0	FALSE	FALSE	FALSE	TRUE	FALSE	FALSE	FALSE	FALSE	FALSE	FALSE	FALSE	FALSE
chr12	51868671	51869972	ANKRD33	-18687	1	0	0	TRUE	FALSE	FALSE	FALSE	FALSE	FALSE	TRUE	FALSE	FALSE	FALSE	FALSE	FALSE
chr12	51951666	51952379	ACVR1B	117	1	0	0	FALSE	FALSE	TRUE	FALSE	FALSE	FALSE	FALSE	FALSE	FALSE	FALSE	FALSE	FALSE
chr12	52010248	52010366	GRASP	-184	0	1	0	FALSE	TRUE	FALSE	FALSE	FALSE	FALSE	FALSE	FALSE	FALSE	FALSE	FALSE	FALSE
chr12	52024729	52025144	NR4A1	2105	1	0	0	FALSE	FALSE	FALSE	FALSE	TRUE	FALSE	FALSE	FALSE	FALSE	FALSE	FALSE	FALSE
chr12	52025362	52026261	NR4A1	2980	0	1	0	FALSE	FALSE	FALSE	FALSE	TRUE	FALSE	FALSE	FALSE	FALSE	FALSE	FALSE	FALSE
chr12	52027692	52027810	NR4A1	4920	0	1	0	TRUE	FALSE	FALSE	FALSE	FALSE	FALSE	FALSE	FALSE	FALSE	FALSE	FALSE	FALSE
chr12	52051343	52051743	NR4A1	0	0	0	1	FALSE	FALSE	FALSE	TRUE	FALSE	FALSE	FALSE	FALSE	FALSE	TRUE	FALSE	FALSE
chr12	52069973	52070571	ATG101	299	1	0	0	FALSE	FALSE	TRUE	TRUE	FALSE	FALSE	FALSE	FALSE	FALSE	FALSE	FALSE	FALSE
chr12	52070602	52070851	ATG101	753	1	0	0	FALSE	FALSE	TRUE	TRUE	FALSE	FALSE	FALSE	FALSE	FALSE	FALSE	FALSE	FALSE
chr12	52083534	52083652	OR7E47P	-1152	0	1	0	TRUE	FALSE	FALSE	FALSE	FALSE	FALSE	FALSE	FALSE	FALSE	FALSE	FALSE	FALSE
chr12	52121968	52122086	LOC105369771	-2988	0	1	0	TRUE	FALSE	FALSE	FALSE	FALSE	FALSE	FALSE	FALSE	FALSE	FALSE	FALSE	FALSE
chr12	52143549	52144108	LOC105369771	-24789	0	1	0	TRUE	FALSE	FALSE	FALSE	FALSE	FALSE	FALSE	FALSE	FALSE	FALSE	FALSE	FALSE
chr12	52146915	52148011	LOC105369771	-28424	1	0	0	FALSE	FALSE	FALSE	TRUE	FALSE	FALSE	FALSE	FALSE	FALSE	FALSE	FALSE	FALSE
chr12	52148183	52150026	LOC105369771	-30065	1	0	0	FALSE	FALSE	FALSE	TRUE	FALSE	FALSE	FALSE	FALSE	FALSE	FALSE	FALSE	FALSE
chr12	52163730	52164520	KRT80	21661	1	0	0	TRUE	TRUE	FALSE	FALSE	FALSE	FALSE	FALSE	FALSE	FALSE	FALSE	FALSE	FALSE
chr12	52198536	52199182	KRT80	-6859	1	0	0	TRUE	FALSE	FALSE	FALSE	FALSE	FALSE	FALSE	FALSE	FALSE	FALSE	FALSE	FALSE
chr12	52199434	52199952	KRT80	-7693	1	0	0	TRUE	TRUE	FALSE	FALSE	FALSE	FALSE	FALSE	FALSE	FALSE	FALSE	FALSE	FALSE
chr12	52200215	52201821	KRT80	-9018	1	0	0	FALSE	TRUE	FALSE	TRUE	TRUE	FALSE	FALSE	FALSE	FALSE	FALSE	FALSE	FALSE
chr12	52202316	52203894	C12orf80	7750	1	0	0	TRUE	FALSE	FALSE	FALSE	FALSE	FALSE	FALSE	FALSE	FALSE	FALSE	FALSE	FALSE
chr12	52217178	52217663	LINC00592	6491	1	0	0	FALSE	FALSE	FALSE	TRUE	FALSE	FALSE	FALSE	FALSE	FALSE	FALSE	FALSE	FALSE
chr12	52879185	52880047	KRT8	25468	1	0	0	FALSE	FALSE	FALSE	TRUE	FALSE	FALSE	FALSE	FALSE	FALSE	FALSE	FALSE	FALSE
chr12	53047025	53047948	TNS2	-103	0	1	0	FALSE	FALSE	TRUE	FALSE	FALSE	FALSE	FALSE	FALSE	FALSE	FALSE	FALSE	FALSE
chr12	53061861	53061979	MIR6757	4977	0	1	0	FALSE	FALSE	FALSE	TRUE	FALSE	TRUE	FALSE	FALSE	FALSE	FALSE	FALSE	FALSE
chr12	53068537	53068655	SPRYD3	10824	0	1	0	TRUE	FALSE	FALSE	FALSE	FALSE	FALSE	FALSE	FALSE	FALSE	FALSE	FALSE	FALSE
chr12	53097651	53099027	IGFBP6	688	1	0	0	TRUE	FALSE	FALSE	FALSE	FALSE	FALSE	FALSE	FALSE	FALSE	FALSE	FALSE	FALSE
chr12	53225285	53225517	RARG	-4988	1	0	0	FALSE	FALSE	FALSE	TRUE	TRUE	FALSE	FALSE	FALSE	FALSE	FALSE	FALSE	FALSE
chr12	53225771	53226038	RARG	-5491	1	0	0	FALSE	FALSE	FALSE	TRUE	TRUE	FALSE	FALSE	FALSE	FALSE	FALSE	FALSE	FALSE
chr12	53482670	53482788	MAP3K12	10341	0	1	0	TRUE	FALSE	FALSE	FALSE	FALSE	FALSE	FALSE	FALSE	FALSE	FALSE	FALSE	FALSE
chr12	53504223	53504341	TARBP2	2673	0	1	0	FALSE	FALSE	FALSE	TRUE	FALSE	FALSE	FALSE	FALSE	FALSE	FALSE	FALSE	FALSE
chr12	53508675	53508793	NPFF	-1096	0	1	0	TRUE	FALSE	FALSE	FALSE	FALSE	FALSE	FALSE	FALSE	FALSE	FALSE	FALSE	FALSE
chr12	53755713	53755831	CISTR	1262	0	1	0	TRUE	FALSE	TRUE	FALSE	FALSE	FALSE	FALSE	FALSE	FALSE	FALSE	FALSE	FALSE
chr12	53938738	53939138	HOXC13	0	0	0	1	FALSE	FALSE	FALSE	TRUE	FALSE	FALSE	FALSE	FALSE	FALSE	FALSE	FALSE	FALSE
chr12	53938791	53939643	HOXC13	426	1	0	0	FALSE	FALSE	FALSE	TRUE	FALSE	FALSE	FALSE	FALSE	FALSE	TRUE	FALSE	FALSE
chr12	54053764	54054164	HOXC4	0	0	0	1	FALSE	FALSE	FALSE	TRUE	FALSE	FALSE	FALSE	FALSE	FALSE	FALSE	FALSE	FALSE
chr12	54368188	54368289	GPR84	-3014	1	0	0	TRUE	FALSE	FALSE	FALSE	FALSE	FALSE	FALSE	FALSE	FALSE	FALSE	FALSE	FALSE
chr12	54387388	54388702	ZNF385A	-2256	1	0	0	FALSE	FALSE	FALSE	TRUE	FALSE	FALSE	FALSE	FALSE	FALSE	FALSE	FALSE	FALSE
chr12	54388802	54389180	ZNF385A	2290	1	0	0	FALSE	FALSE	FALSE	TRUE	FALSE	FALSE	FALSE	FALSE	FALSE	FALSE	FALSE	FALSE
chr12	54390205	54391305	ZNF385A	526	1	0	0	TRUE	FALSE	FALSE	FALSE	FALSE	FALSE	FALSE	FALSE	FALSE	FALSE	FALSE	FALSE
chr12	54391364	54391482	ZNF385A	-90	0	1	0	TRUE	FALSE	FALSE	FALSE	FALSE	FALSE	FALSE	FALSE	FALSE	FALSE	FALSE	FALSE
chr12	54417089	54417959	ITGA5	1742	1	0	0	TRUE	FALSE	FALSE	TRUE	FALSE	FALSE	FALSE	FALSE	FALSE	FALSE	FALSE	FALSE
chr12	54418048	54418784	ITGA5	850	1	0	0	FALSE	FALSE	FALSE	TRUE	FALSE	FALSE	FALSE	FALSE	FALSE	TRUE	FALSE	FALSE
chr12	54418929	54419329	ITGA5	0	0	0	1	TRUE	FALSE	FALSE	FALSE	FALSE	FALSE	FALSE	FALSE	FALSE	FALSE	FALSE	FALSE
chr12	54587475	54587945	PPP1R1A	929	1	0	0	FALSE	FALSE	FALSE	TRUE	FALSE	FALSE	FALSE	FALSE	FALSE	FALSE	FALSE	FALSE
chr12	55646258	55646376	OR10P1	9426	0	1	0	TRUE	FALSE	FALSE	FALSE	FALSE	FALSE	FALSE	FALSE	FALSE	FALSE	FALSE	FALSE
chr12	55716291	55716870	BLOC1S1	289	1	0	0	TRUE	FALSE	FALSE	FALSE	FALSE	FALSE	FALSE	FALSE	FALSE	FALSE	FALSE	FALSE
chr12	55716962	55718441	BLOC1S1	1410	1	0	0	TRUE	FALSE	FALSE	FALSE	FALSE	FALSE	FALSE	FALSE	FALSE	FALSE	FALSE	FALSE
chr12	55727572	55727788	CD63	108	1	0	0	TRUE	FALSE	FALSE	FALSE	FALSE	FALSE	FALSE	FALSE	FALSE	FALSE	FALSE	FALSE
chr12	55730309	55730427	CD63	-695	0	1	0	FALSE	FALSE	FALSE	FALSE	TRUE	FALSE	FALSE	FALSE	FALSE	FALSE	FALSE	FALSE
chr12	55743206	55743606	GDF11	0	0	0	1	FALSE	FALSE	FALSE	TRUE	FALSE	FALSE	FALSE	FALSE	FALSE	FALSE	FALSE	FALSE
chr12	55743279	55744277	GDF11	499	0	1	0	TRUE	FALSE	FALSE	FALSE	FALSE	FALSE	TRUE	FALSE	FALSE	FALSE	FALSE	FALSE
chr12	56006909	56008464	IKZF4	13	1	0	0	FALSE	FALSE	FALSE	TRUE	FALSE	FALSE	FALSE	FALSE	FALSE	FALSE	FALSE	FALSE
chr12	56041607	56041725	LOC105369780	95	0	1	0	FALSE	FALSE	FALSE	TRUE	TRUE	TRUE	FALSE	FALSE	FALSE	FALSE	TRUE	FALSE
chr12	56118228	56118346	ZC3H10	68	0	1	0	FALSE	FALSE	FALSE	TRUE	FALSE	FALSE	FALSE	FALSE	FALSE	TRUE	FALSE	FALSE
chr12	56155529	56155658	MYL6	-2667	1	0	0	TRUE	FALSE	FALSE	FALSE	FALSE	FALSE	FALSE	FALSE	FALSE	FALSE	FALSE	FALSE
chr12	56299184	56300391	CS	604	1	0	0	FALSE	FALSE	FALSE	TRUE	TRUE	FALSE	FALSE	FALSE	FALSE	TRUE	TRUE	FALSE
chr12	56314956	56316344	CNPY2	694	1	0	0	FALSE	FALSE	FALSE	FALSE	FALSE	TRUE	FALSE	FALSE	FALSE	FALSE	FALSE	FALSE
chr12	56413376	56413571	TIMELESS	35921	1	0	0	TRUE	FALSE	FALSE	FALSE	FALSE	FALSE	FALSE	FALSE	FALSE	FALSE	FALSE	FALSE
chr12	56487368	56488414	GLS2	-292	1	0	0	TRUE	TRUE	FALSE	FALSE	FALSE	FALSE	TRUE	FALSE	FALSE	FALSE	FALSE	FALSE
chr12	56645242	56645360	SNORD59A	-200	0	1	0	FALSE	FALSE	FALSE	TRUE	TRUE	FALSE	FALSE	FALSE	FALSE	FALSE	FALSE	FALSE
chr12	56645685	56646085	ATP5B	0	0	0	1	FALSE	FALSE	FALSE	TRUE	TRUE	TRUE	FALSE	FALSE	FALSE	TRUE	TRUE	FALSE
chr12	56687987	56688387	PTGES3	0	0	0	1	FALSE	FALSE	FALSE	TRUE	FALSE	FALSE	FALSE	FALSE	FALSE	FALSE	FALSE	FALSE
chr12	56724611	56725292	NACA	305	1	0	0	FALSE	FALSE	FALSE	TRUE	TRUE	FALSE	FALSE	FALSE	FALSE	FALSE	FALSE	FALSE
chr12	56725001	56725401	NACA	0	0	0	1	FALSE	FALSE	FALSE	FALSE	TRUE	TRUE	FALSE	FALSE	FALSE	FALSE	FALSE	FALSE
chr12	57078072	57078791	NEMP1	337	1	0	0	FALSE	FALSE	FALSE	TRUE	FALSE	FALSE	FALSE	FALSE	FALSE	TRUE	FALSE	FALSE
chr12	57085920	57086496	NEMP1	964	1	0	0	TRUE	FALSE	FALSE	TRUE	FALSE	TRUE	FALSE	FALSE	FALSE	FALSE	FALSE	FALSE
chr12	57086557	57087893	NEMP1	-53	1	0	0	TRUE	FALSE	FALSE	TRUE	FALSE	TRUE	FALSE	FALSE	FALSE	TRUE	FALSE	FALSE
chr12	57132044	57132547	LRP1	3797	1	0	0	FALSE	TRUE	FALSE	FALSE	FALSE	FALSE	FALSE	FALSE	FALSE	FALSE	FALSE	FALSE
chr12	57133021	57133669	LRP1	4847	1	0	0	FALSE	TRUE	FALSE	FALSE	FALSE	FALSE	FALSE	FALSE	FALSE	FALSE	FALSE	FALSE
chr12	57196093	57196316	MIR1228	1701	1	0	0	TRUE	FALSE	FALSE	FALSE	FALSE	FALSE	FALSE	FALSE	FALSE	FALSE	FALSE	FALSE
chr12	57229621	57230021	SHMT2	0	0	0	1	FALSE	FALSE	FALSE	TRUE	FALSE	TRUE	FALSE	FALSE	FALSE	FALSE	FALSE	FALSE
chr12	57239968	57240692	NDUFA4L2	425	1	0	0	FALSE	FALSE	FALSE	TRUE	FALSE	FALSE	FALSE	FALSE	FALSE	FALSE	FALSE	FALSE
chr12	57429827	57431869	R3HDM2	-33	1	0	0	TRUE	FALSE	FALSE	FALSE	FALSE	FALSE	TRUE	FALSE	FALSE	FALSE	FALSE	FALSE
chr12	57430703	57431103	R3HDM2	0	0	0	1	FALSE	FALSE	FALSE	FALSE	TRUE	TRUE	FALSE	FALSE	FALSE	FALSE	FALSE	FALSE
chr12	575053	575521	LOC105369595	11199	1	0	0	TRUE	FALSE	FALSE	FALSE	FALSE	FALSE	FALSE	FALSE	FALSE	FALSE	FALSE	FALSE
chr12	575707	576698	LOC105369595	10284	1	0	0	TRUE	FALSE	FALSE	TRUE	TRUE	FALSE	FALSE	FALSE	FALSE	FALSE	FALSE	FALSE
chr12	57611434	57612035	ARHGEF25	300	1	0	0	TRUE	TRUE	FALSE	TRUE	TRUE	FALSE	FALSE	FALSE	FALSE	FALSE	FALSE	FALSE
chr12	57726158	57726276	AGAP2-AS1	-22	0	1	0	TRUE	FALSE	FALSE	FALSE	FALSE	FALSE	FALSE	FALSE	FALSE	FALSE	FALSE	FALSE
chr12	57735987	57736105	AGAP2	2200	0	1	0	TRUE	FALSE	FALSE	FALSE	FALSE	FALSE	FALSE	FALSE	FALSE	FALSE	FALSE	FALSE
chr12	57736966	57737534	AGAP2	996	1	0	0	FALSE	FALSE	FALSE	TRUE	TRUE	FALSE	FALSE	FALSE	FALSE	FALSE	FALSE	FALSE
chr12	57737561	57738246	AGAP2	343	0	1	0	FALSE	FALSE	TRUE	TRUE	TRUE	FALSE	FALSE	FALSE	FALSE	FALSE	FALSE	FALSE
chr12	57744947	57745347	TSPAN31	0	0	0	1	TRUE	FALSE	FALSE	FALSE	FALSE	FALSE	FALSE	FALSE	FALSE	FALSE	FALSE	FALSE
chr12	57745490	57745608	TSPAN31	527	0	1	0	FALSE	FALSE	FALSE	TRUE	FALSE	FALSE	FALSE	FALSE	FALSE	FALSE	FALSE	FALSE
chr12	57752000	57752400	CDK4	0	0	0	1	FALSE	FALSE	FALSE	TRUE	TRUE	TRUE	FALSE	FALSE	FALSE	TRUE	TRUE	TRUE
chr12	57764686	57767096	CYP27B1	1302	0	1	0	TRUE	TRUE	TRUE	TRUE	FALSE	FALSE	FALSE	FALSE	FALSE	TRUE	FALSE	FALSE
chr12	57771807	57772207	METTL1	0	0	0	1	FALSE	FALSE	TRUE	FALSE	FALSE	FALSE	FALSE	FALSE	FALSE	FALSE	FALSE	FALSE
chr12	57782627	57782745	TSFM	-58	0	1	0	FALSE	FALSE	FALSE	TRUE	FALSE	FALSE	FALSE	FALSE	FALSE	FALSE	FALSE	FALSE
chr12	57844578	57846964	CTDSP2	953	1	0	0	TRUE	FALSE	FALSE	TRUE	TRUE	TRUE	FALSE	FALSE	FALSE	FALSE	FALSE	FALSE
chr12	57852241	57853389	CTDSP2	-5851	1	0	0	FALSE	FALSE	FALSE	FALSE	TRUE	FALSE	FALSE	FALSE	FALSE	FALSE	FALSE	FALSE
chr12	57887870	57889261	LOC101927608	-4698	1	0	0	FALSE	FALSE	FALSE	FALSE	TRUE	FALSE	FALSE	FALSE	FALSE	FALSE	FALSE	FALSE
chr12	57895818	57897689	LOC283387	-2934	1	0	0	TRUE	FALSE	FALSE	TRUE	FALSE	FALSE	TRUE	FALSE	FALSE	FALSE	FALSE	FALSE
chr12	586246	586486	LOC105369595	120	1	0	0	TRUE	FALSE	FALSE	FALSE	FALSE	FALSE	FALSE	FALSE	FALSE	FALSE	FALSE	FALSE
chr12	59061739	59061953	LOC105369791	141208	1	0	0	TRUE	FALSE	FALSE	FALSE	FALSE	FALSE	FALSE	FALSE	FALSE	FALSE	FALSE	FALSE
chr12	6063258	6063376	VWF	61358	0	1	0	TRUE	FALSE	FALSE	TRUE	FALSE	FALSE	FALSE	FALSE	FALSE	FALSE	FALSE	FALSE
chr12	6067708	6067826	VWF	56908	0	1	0	TRUE	FALSE	FALSE	FALSE	FALSE	FALSE	FALSE	FALSE	FALSE	FALSE	FALSE	FALSE
chr12	6078568	6078686	VWF	46048	0	1	0	TRUE	FALSE	FALSE	FALSE	FALSE	FALSE	FALSE	FALSE	FALSE	FALSE	FALSE	FALSE
chr12	62260165	62260283	USP15	-115	0	1	0	FALSE	FALSE	FALSE	FALSE	FALSE	TRUE	FALSE	FALSE	FALSE	FALSE	FALSE	FALSE
chr12	6278020	6279141	LOC105369625	16716	0	1	0	TRUE	FALSE	FALSE	FALSE	FALSE	FALSE	FALSE	FALSE	FALSE	FALSE	FALSE	FALSE
chr12	62933560	62934885	PPM1H	230	1	0	0	TRUE	TRUE	FALSE	TRUE	TRUE	FALSE	FALSE	FALSE	FALSE	FALSE	FALSE	FALSE
chr12	6310884	6311002	PLEKHG6	11	0	1	0	FALSE	FALSE	FALSE	FALSE	TRUE	FALSE	FALSE	FALSE	FALSE	FALSE	FALSE	FALSE
chr12	6312650	6313579	PLEKHG6	464	0	1	0	TRUE	FALSE	FALSE	TRUE	FALSE	FALSE	FALSE	FALSE	FALSE	FALSE	FALSE	FALSE
chr12	6340023	6340562	TNFRSF1A	1825	1	0	0	FALSE	FALSE	FALSE	FALSE	FALSE	TRUE	FALSE	FALSE	FALSE	FALSE	FALSE	FALSE
chr12	6341230	6342117	TNFRSF1A	444	1	0	0	FALSE	FALSE	FALSE	TRUE	TRUE	FALSE	FALSE	FALSE	FALSE	FALSE	FALSE	FALSE
chr12	6384032	6385410	LTBR	649	1	0	0	FALSE	FALSE	FALSE	TRUE	TRUE	TRUE	FALSE	FALSE	FALSE	TRUE	FALSE	TRUE
chr12	64390690	64390808	C12orf56	-169	0	1	0	TRUE	FALSE	FALSE	FALSE	FALSE	FALSE	FALSE	FALSE	FALSE	FALSE	FALSE	FALSE
chr12	64404262	64405481	XPOT	-174	0	1	0	TRUE	FALSE	FALSE	TRUE	FALSE	FALSE	FALSE	FALSE	FALSE	FALSE	FALSE	FALSE
chr12	64824539	64824939	TBC1D30	0	0	0	1	FALSE	FALSE	FALSE	TRUE	FALSE	FALSE	FALSE	FALSE	FALSE	FALSE	FALSE	FALSE
chr12	66103365	66103483	LLPH-AS1	-27326	0	1	0	TRUE	FALSE	TRUE	FALSE	FALSE	FALSE	FALSE	FALSE	FALSE	FALSE	FALSE	FALSE
chr12	66107529	66107647	LLPH-AS1	-23162	0	1	0	TRUE	FALSE	FALSE	FALSE	FALSE	FALSE	FALSE	FALSE	FALSE	FALSE	FALSE	FALSE
chr12	66168459	66168675	TMBIM4	1505	1	0	0	TRUE	FALSE	FALSE	FALSE	FALSE	FALSE	FALSE	FALSE	FALSE	FALSE	FALSE	FALSE
chr12	66169003	66170072	TMBIM4	535	0	1	0	TRUE	FALSE	FALSE	TRUE	TRUE	FALSE	FALSE	FALSE	FALSE	TRUE	FALSE	FALSE
chr12	66189197	66190386	LOC107984523	339	1	0	0	FALSE	FALSE	FALSE	TRUE	FALSE	TRUE	FALSE	FALSE	FALSE	FALSE	FALSE	FALSE
chr12	66190493	66191402	LOC107984523	1495	1	0	0	TRUE	FALSE	FALSE	FALSE	FALSE	FALSE	FALSE	FALSE	FALSE	FALSE	FALSE	FALSE
chr12	66191514	66191898	LOC107984523	2254	1	0	0	TRUE	FALSE	FALSE	FALSE	FALSE	FALSE	FALSE	FALSE	FALSE	FALSE	FALSE	FALSE
chr12	6688521	6689375	ZNF384	0	1	0	0	TRUE	FALSE	FALSE	FALSE	FALSE	FALSE	FALSE	FALSE	FALSE	FALSE	FALSE	FALSE
chr12	67269280	67270394	CAND1	557	0	1	0	FALSE	FALSE	FALSE	TRUE	FALSE	FALSE	FALSE	FALSE	FALSE	FALSE	FALSE	FALSE
chr12	67355968	67356086	LOC105369813	33687	0	1	0	TRUE	FALSE	FALSE	FALSE	FALSE	FALSE	FALSE	FALSE	FALSE	FALSE	FALSE	FALSE
chr12	67520597	67521135	LOC100507175	785	1	0	0	FALSE	FALSE	TRUE	FALSE	FALSE	FALSE	FALSE	FALSE	FALSE	FALSE	FALSE	FALSE
chr12	6766261	6766661	PTMS	0	0	0	1	TRUE	FALSE	TRUE	FALSE	FALSE	FALSE	FALSE	FALSE	FALSE	FALSE	FALSE	FALSE
chr12	6766374	6767321	PTMS	473	1	0	0	TRUE	FALSE	FALSE	FALSE	TRUE	FALSE	FALSE	FALSE	FALSE	FALSE	FALSE	FALSE
chr12	6772503	6774193	LAG3	845	1	0	0	FALSE	FALSE	FALSE	TRUE	FALSE	FALSE	FALSE	FALSE	FALSE	FALSE	FALSE	FALSE
chr12	6775779	6775892	LAG3	3332	1	0	0	TRUE	FALSE	FALSE	FALSE	TRUE	FALSE	FALSE	FALSE	FALSE	FALSE	FALSE	FALSE
chr12	68001624	68001742	IFNG-AS1	12239	0	1	0	TRUE	FALSE	FALSE	FALSE	FALSE	FALSE	FALSE	FALSE	FALSE	FALSE	FALSE	FALSE
chr12	68042552	68042670	IFNG-AS1	53167	0	1	0	TRUE	FALSE	FALSE	FALSE	FALSE	FALSE	FALSE	FALSE	FALSE	FALSE	FALSE	FALSE
chr12	6927700	6928100	ATN1	0	0	0	1	FALSE	FALSE	FALSE	FALSE	FALSE	TRUE	FALSE	FALSE	FALSE	FALSE	FALSE	FALSE
chr12	6928316	6928866	ATN1	275	1	0	0	FALSE	TRUE	FALSE	FALSE	FALSE	FALSE	FALSE	FALSE	FALSE	FALSE	FALSE	FALSE
chr12	69291061	69291179	MIR1279	-17902	0	1	0	TRUE	FALSE	FALSE	FALSE	FALSE	FALSE	FALSE	FALSE	FALSE	FALSE	FALSE	FALSE
chr12	69470348	69471306	FRS2	457	1	0	0	FALSE	FALSE	FALSE	TRUE	TRUE	TRUE	FALSE	FALSE	FALSE	FALSE	FALSE	FALSE
chr12	6953428	6954327	PTPN6	2593	1	0	0	TRUE	FALSE	TRUE	FALSE	FALSE	FALSE	FALSE	FALSE	FALSE	FALSE	FALSE	FALSE
chr12	69585351	69585751	CCT2	0	0	0	1	FALSE	FALSE	FALSE	TRUE	TRUE	FALSE	FALSE	FALSE	FALSE	FALSE	FALSE	FALSE
chr12	69585649	69585767	CCT2	27	0	1	0	FALSE	FALSE	FALSE	TRUE	TRUE	TRUE	FALSE	FALSE	FALSE	TRUE	TRUE	TRUE
chr12	6958786	6959702	LOC105369634	3855	1	0	0	FALSE	FALSE	FALSE	FALSE	TRUE	FALSE	FALSE	FALSE	FALSE	FALSE	FALSE	FALSE
chr12	69738665	69738783	RAB3IP	14	0	1	0	TRUE	FALSE	FALSE	FALSE	FALSE	FALSE	FALSE	FALSE	FALSE	FALSE	FALSE	FALSE
chr12	69738779	69739179	RAB3IP	0	0	0	1	FALSE	FALSE	FALSE	TRUE	FALSE	FALSE	FALSE	FALSE	FALSE	FALSE	FALSE	FALSE
chr12	70366281	70367681	KCNMB4	700	1	0	0	FALSE	FALSE	FALSE	TRUE	FALSE	FALSE	FALSE	FALSE	FALSE	FALSE	FALSE	FALSE
chr12	70719947	70720065	PTPRR	34602	0	1	0	FALSE	FALSE	FALSE	FALSE	FALSE	TRUE	FALSE	FALSE	FALSE	FALSE	FALSE	FALSE
chr12	7131732	7131850	CLSTN3	436	0	1	0	FALSE	FALSE	TRUE	FALSE	FALSE	FALSE	FALSE	FALSE	FALSE	FALSE	FALSE	FALSE
chr12	7155720	7155838	CLSTN3	24424	0	1	0	FALSE	FALSE	FALSE	TRUE	FALSE	FALSE	FALSE	FALSE	FALSE	TRUE	FALSE	FALSE
chr12	7189598	7189998	PEX5	0	0	0	1	FALSE	FALSE	FALSE	TRUE	FALSE	FALSE	FALSE	FALSE	FALSE	FALSE	FALSE	FALSE
chr12	75330104	75330222	CAPS2	-59	0	1	0	TRUE	FALSE	FALSE	TRUE	FALSE	FALSE	FALSE	FALSE	FALSE	FALSE	FALSE	FALSE
chr12	75334437	75334555	GLIPR1L1	-142	0	1	0	FALSE	FALSE	FALSE	FALSE	FALSE	TRUE	FALSE	FALSE	FALSE	FALSE	FALSE	FALSE
chr12	75850862	75851033	LOC105369846	-68750	1	0	0	FALSE	FALSE	FALSE	TRUE	FALSE	FALSE	FALSE	FALSE	FALSE	FALSE	FALSE	FALSE
chr12	77047958	77048076	E2F7	7962	0	1	0	FALSE	FALSE	FALSE	FALSE	FALSE	TRUE	FALSE	FALSE	FALSE	FALSE	FALSE	FALSE
chr12	77065255	77065655	E2F7	0	0	0	1	FALSE	FALSE	FALSE	FALSE	TRUE	FALSE	FALSE	FALSE	FALSE	FALSE	FALSE	FALSE
chr12	80321859	80322212	PTPRQ	-102225	1	0	0	TRUE	FALSE	FALSE	FALSE	FALSE	FALSE	FALSE	FALSE	FALSE	FALSE	FALSE	FALSE
chr12	8032617	8033017	FOXJ2	0	0	0	1	FALSE	FALSE	FALSE	TRUE	TRUE	TRUE	FALSE	FALSE	FALSE	FALSE	FALSE	FALSE
chr12	80413604	80413722	PTPRQ	-10597	0	1	0	TRUE	FALSE	FALSE	FALSE	FALSE	FALSE	FALSE	FALSE	FALSE	FALSE	FALSE	FALSE
chr12	80936833	80937915	LOC107987179	-475	1	0	0	TRUE	FALSE	TRUE	FALSE	FALSE	FALSE	FALSE	FALSE	FALSE	FALSE	FALSE	FALSE
chr12	8108940	8109058	CLEC4A	6068	0	1	0	FALSE	FALSE	FALSE	TRUE	FALSE	FALSE	FALSE	FALSE	FALSE	FALSE	FALSE	FALSE
chr12	82358097	82358497	CCDC59	0	0	0	1	FALSE	FALSE	FALSE	TRUE	FALSE	FALSE	FALSE	FALSE	FALSE	TRUE	FALSE	FALSE
chr12	85057498	85057616	LRRIQ1	21177	0	1	0	FALSE	FALSE	FALSE	TRUE	FALSE	FALSE	FALSE	FALSE	FALSE	FALSE	FALSE	FALSE
chr12	89019696	89019814	LOC728084	-63	0	1	0	TRUE	TRUE	FALSE	FALSE	FALSE	FALSE	FALSE	FALSE	FALSE	FALSE	FALSE	FALSE
chr12	89551909	89552027	POC1B-GALNT4	-25706	0	1	0	FALSE	FALSE	FALSE	TRUE	FALSE	FALSE	FALSE	FALSE	FALSE	FALSE	FALSE	FALSE
chr12	89708954	89710556	ATP2B1	-402	1	0	0	TRUE	FALSE	FALSE	TRUE	FALSE	FALSE	FALSE	FALSE	FALSE	FALSE	FALSE	FALSE
chr12	93441631	93442031	UBE2N	0	0	0	1	FALSE	FALSE	TRUE	TRUE	TRUE	FALSE	FALSE	FALSE	FALSE	FALSE	FALSE	FALSE
chr12	93677716	93678378	CRADD	331	1	0	0	TRUE	FALSE	FALSE	FALSE	FALSE	FALSE	FALSE	FALSE	FALSE	FALSE	FALSE	FALSE
chr12	94546174	94546292	MIR5700	-15555	0	1	0	FALSE	FALSE	FALSE	TRUE	FALSE	FALSE	FALSE	FALSE	FALSE	FALSE	FALSE	FALSE
chr12	96398092	96398480	CDK17	1092	1	0	0	FALSE	FALSE	TRUE	FALSE	FALSE	FALSE	FALSE	FALSE	FALSE	FALSE	FALSE	FALSE
chr12	96398612	96400588	CDK17	-196	1	0	0	FALSE	FALSE	TRUE	TRUE	FALSE	TRUE	FALSE	FALSE	FALSE	FALSE	FALSE	FALSE
chr12	9648046	9648997	LOC374443	475	1	0	0	TRUE	TRUE	TRUE	FALSE	FALSE	FALSE	FALSE	FALSE	FALSE	FALSE	FALSE	FALSE
chr12	98645460	98645578	APAF1	220	0	1	0	FALSE	FALSE	TRUE	FALSE	FALSE	FALSE	FALSE	FALSE	FALSE	FALSE	FALSE	FALSE
chr13	100088986	100089386	PCCA	0	0	0	1	TRUE	FALSE	FALSE	TRUE	FALSE	FALSE	FALSE	FALSE	FALSE	FALSE	FALSE	FALSE
chr13	100573174	100573292	GGACT	15534	0	1	0	FALSE	FALSE	TRUE	FALSE	FALSE	FALSE	FALSE	FALSE	FALSE	FALSE	FALSE	FALSE
chr13	100588209	100588897	GGACT	214	0	1	0	FALSE	FALSE	TRUE	FALSE	FALSE	FALSE	FALSE	FALSE	FALSE	FALSE	FALSE	FALSE
chr13	100695180	100695298	NALCN-AS1	-13085	0	1	0	FALSE	FALSE	FALSE	TRUE	FALSE	FALSE	FALSE	FALSE	FALSE	FALSE	FALSE	FALSE
chr13	102845840	102847197	ERCC5	678	0	1	0	TRUE	FALSE	FALSE	TRUE	FALSE	TRUE	FALSE	FALSE	FALSE	FALSE	FALSE	FALSE
chr13	102847424	102847586	ERCC5	1665	1	0	0	TRUE	FALSE	FALSE	FALSE	FALSE	FALSE	FALSE	FALSE	FALSE	FALSE	FALSE	FALSE
chr13	102866411	102866529	METTL21EP	-13628	0	1	0	FALSE	FALSE	FALSE	TRUE	FALSE	FALSE	FALSE	FALSE	FALSE	FALSE	FALSE	FALSE
chr13	105919364	105919886	LINC00343	212796	1	0	0	TRUE	FALSE	FALSE	FALSE	FALSE	FALSE	FALSE	FALSE	FALSE	FALSE	FALSE	FALSE
chr13	106533161	106533279	EFNB2	1820	0	1	0	TRUE	FALSE	FALSE	FALSE	FALSE	FALSE	FALSE	FALSE	FALSE	FALSE	FALSE	FALSE
chr13	106536563	106536681	EFNB2	-1582	0	1	0	FALSE	FALSE	FALSE	FALSE	TRUE	FALSE	FALSE	FALSE	FALSE	FALSE	FALSE	FALSE
chr13	107138628	107138746	LOC105370350	-5763	0	1	0	FALSE	FALSE	FALSE	TRUE	FALSE	FALSE	FALSE	FALSE	FALSE	FALSE	FALSE	FALSE
chr13	108070142	108070259	LIG4	144582	1	0	0	TRUE	FALSE	FALSE	FALSE	FALSE	FALSE	FALSE	FALSE	FALSE	FALSE	FALSE	FALSE
chr13	108070309	108070897	LIG4	144179	1	0	0	TRUE	FALSE	FALSE	FALSE	FALSE	FALSE	FALSE	FALSE	FALSE	FALSE	FALSE	FALSE
chr13	108070997	108071300	LIG4	143634	1	0	0	TRUE	FALSE	FALSE	FALSE	FALSE	FALSE	FALSE	FALSE	FALSE	FALSE	FALSE	FALSE
chr13	108218752	108218870	ABHD13	67	0	1	0	FALSE	FALSE	FALSE	TRUE	FALSE	FALSE	FALSE	FALSE	FALSE	FALSE	FALSE	FALSE
chr13	110074139	110074257	LOC101927646	-16555	0	1	0	TRUE	FALSE	FALSE	FALSE	FALSE	FALSE	FALSE	FALSE	FALSE	FALSE	FALSE	FALSE
chr13	110094963	110095081	LOC105370361	-26685	0	1	0	FALSE	FALSE	FALSE	TRUE	FALSE	FALSE	FALSE	FALSE	FALSE	FALSE	FALSE	FALSE
chr13	110137796	110137914	LOC101927712	2382	0	1	0	FALSE	FALSE	TRUE	FALSE	FALSE	FALSE	FALSE	FALSE	FALSE	FALSE	FALSE	FALSE
chr13	110555778	110556569	RAB20	5564	1	0	0	TRUE	FALSE	FALSE	FALSE	FALSE	FALSE	FALSE	FALSE	FALSE	FALSE	FALSE	FALSE
chr13	110560534	110561737	RAB20	602	1	0	0	TRUE	FALSE	FALSE	FALSE	FALSE	FALSE	FALSE	FALSE	FALSE	FALSE	FALSE	FALSE
chr13	110713262	110713790	CARS2	1	1	0	0	TRUE	FALSE	TRUE	FALSE	FALSE	FALSE	TRUE	FALSE	FALSE	FALSE	FALSE	FALSE
chr13	110834654	110834772	LOC105370363	12266	0	1	0	TRUE	FALSE	FALSE	FALSE	FALSE	FALSE	FALSE	FALSE	FALSE	FALSE	FALSE	FALSE
chr13	110913278	110914056	ANKRD10	1440	1	0	0	TRUE	FALSE	FALSE	FALSE	FALSE	FALSE	FALSE	FALSE	FALSE	FALSE	FALSE	FALSE
chr13	110914084	110915107	ANKRD10	512	1	0	0	TRUE	FALSE	FALSE	FALSE	FALSE	FALSE	TRUE	FALSE	FALSE	FALSE	FALSE	FALSE
chr13	110915219	110915337	ANKRD10	-171	0	1	0	TRUE	FALSE	FALSE	FALSE	FALSE	FALSE	FALSE	FALSE	FALSE	FALSE	FALSE	FALSE
chr13	110920086	110920204	ANKRD10	-5038	0	1	0	TRUE	FALSE	FALSE	FALSE	FALSE	FALSE	FALSE	FALSE	FALSE	FALSE	FALSE	FALSE
chr13	111067211	111067854	LINC00368	-28305	1	0	0	FALSE	FALSE	FALSE	TRUE	TRUE	TRUE	FALSE	FALSE	FALSE	FALSE	FALSE	FALSE
chr13	111153568	111153968	ARHGEF7	0	0	0	1	FALSE	FALSE	FALSE	TRUE	FALSE	FALSE	FALSE	FALSE	FALSE	FALSE	FALSE	FALSE
chr13	112444188	112444329	LOC105370372	31259	1	0	0	FALSE	TRUE	FALSE	TRUE	TRUE	TRUE	FALSE	FALSE	FALSE	FALSE	FALSE	FALSE
chr13	112587019	112588185	TUBGCP3	-286	1	0	0	FALSE	FALSE	FALSE	TRUE	TRUE	TRUE	FALSE	FALSE	FALSE	TRUE	TRUE	TRUE
chr13	112587849	112588249	TUBGCP3	0	0	0	1	FALSE	FALSE	FALSE	TRUE	TRUE	TRUE	FALSE	FALSE	FALSE	TRUE	TRUE	FALSE
chr13	112690010	112690410	ATP11A	0	0	0	1	TRUE	FALSE	FALSE	FALSE	FALSE	FALSE	TRUE	FALSE	FALSE	FALSE	FALSE	FALSE
chr13	112769547	112769774	ATP11A-AS1	-14929	1	0	0	FALSE	FALSE	FALSE	TRUE	FALSE	FALSE	FALSE	FALSE	FALSE	FALSE	FALSE	FALSE
chr13	112942658	112944480	MCF2L	-24783	0	1	0	TRUE	FALSE	FALSE	FALSE	FALSE	FALSE	FALSE	FALSE	FALSE	FALSE	FALSE	FALSE
chr13	113001688	113002088	MCF2L	0	0	0	1	TRUE	FALSE	TRUE	FALSE	FALSE	FALSE	FALSE	FALSE	FALSE	FALSE	FALSE	FALSE
chr13	113009359	113010687	LOC107984590	3216	1	0	0	TRUE	FALSE	FALSE	FALSE	FALSE	FALSE	FALSE	FALSE	FALSE	FALSE	FALSE	FALSE
chr13	113015778	113016043	LOC107984590	-2671	1	0	0	TRUE	FALSE	FALSE	FALSE	FALSE	FALSE	FALSE	FALSE	FALSE	FALSE	FALSE	FALSE
chr13	113086112	113086230	F7	-19601	0	1	0	TRUE	FALSE	FALSE	FALSE	FALSE	FALSE	FALSE	FALSE	FALSE	FALSE	FALSE	FALSE
chr13	113122798	113122916	F10	59	0	1	0	TRUE	FALSE	FALSE	FALSE	FALSE	FALSE	TRUE	FALSE	FALSE	FALSE	FALSE	FALSE
chr13	113123389	113123507	F10	650	0	1	0	TRUE	FALSE	FALSE	FALSE	FALSE	FALSE	FALSE	FALSE	FALSE	FALSE	FALSE	FALSE
chr13	113428274	113429131	LOC101928841	-7932	1	0	0	TRUE	FALSE	FALSE	TRUE	FALSE	FALSE	FALSE	FALSE	FALSE	FALSE	FALSE	FALSE
chr13	113457668	113457786	ADPRHL1	-4203	0	1	0	FALSE	FALSE	TRUE	FALSE	FALSE	FALSE	FALSE	FALSE	FALSE	FALSE	FALSE	FALSE
chr13	113490765	113490883	DCUN1D2	-115	0	1	0	FALSE	FALSE	TRUE	FALSE	FALSE	FALSE	FALSE	FALSE	FALSE	FALSE	FALSE	FALSE
chr13	113759242	113760124	TMEM255B	441	1	0	0	TRUE	FALSE	FALSE	FALSE	FALSE	FALSE	FALSE	FALSE	FALSE	FALSE	FALSE	FALSE
chr13	113836743	113838315	LOC105370380	21832	1	0	0	FALSE	FALSE	TRUE	FALSE	FALSE	FALSE	FALSE	FALSE	FALSE	FALSE	FALSE	FALSE
chr13	113863781	113864181	GAS6	0	0	0	1	TRUE	FALSE	FALSE	FALSE	FALSE	FALSE	FALSE	FALSE	FALSE	FALSE	FALSE	FALSE
chr13	114032357	114032568	RASA3	42165	1	0	0	TRUE	FALSE	FALSE	FALSE	FALSE	FALSE	FALSE	FALSE	FALSE	FALSE	FALSE	FALSE
chr13	114132289	114132689	RASA3	0	0	0	1	FALSE	FALSE	FALSE	TRUE	FALSE	FALSE	FALSE	FALSE	FALSE	FALSE	FALSE	FALSE
chr13	20191569	20192975	GJB2	-128	1	0	0	FALSE	FALSE	FALSE	TRUE	FALSE	FALSE	FALSE	FALSE	FALSE	TRUE	FALSE	FALSE
chr13	21060041	21061583	LATS2	-407	1	0	0	FALSE	FALSE	FALSE	FALSE	FALSE	TRUE	FALSE	FALSE	FALSE	FALSE	FALSE	FALSE
chr13	21459012	21459412	ZDHHC20	0	0	0	1	FALSE	FALSE	FALSE	TRUE	FALSE	FALSE	FALSE	FALSE	FALSE	FALSE	FALSE	FALSE
chr13	23375487	23375605	SACS	-3	0	1	0	TRUE	FALSE	FALSE	FALSE	FALSE	FALSE	FALSE	FALSE	FALSE	FALSE	FALSE	FALSE
chr13	23375613	23375731	SACS	-78	0	1	0	TRUE	FALSE	FALSE	FALSE	FALSE	FALSE	FALSE	FALSE	FALSE	FALSE	FALSE	FALSE
chr13	23889122	23889522	MIPEP	0	0	0	1	FALSE	FALSE	FALSE	TRUE	TRUE	TRUE	FALSE	FALSE	FALSE	TRUE	TRUE	FALSE
chr13	24348367	24349559	LINC00566	17514	1	0	0	TRUE	FALSE	FALSE	FALSE	FALSE	FALSE	FALSE	FALSE	FALSE	FALSE	FALSE	FALSE
chr13	24349946	24350461	LINC00566	18754	1	0	0	TRUE	FALSE	FALSE	FALSE	FALSE	FALSE	FALSE	FALSE	FALSE	FALSE	FALSE	FALSE
chr13	24540997	24541115	LOC101927375	57	0	1	0	TRUE	FALSE	FALSE	FALSE	FALSE	FALSE	FALSE	FALSE	FALSE	FALSE	FALSE	FALSE
chr13	26186420	26186538	RNF6	35278	0	1	0	TRUE	FALSE	FALSE	TRUE	FALSE	FALSE	FALSE	FALSE	FALSE	FALSE	FALSE	FALSE
chr13	26557605	26558005	WASF3	0	0	0	1	TRUE	FALSE	FALSE	FALSE	FALSE	FALSE	FALSE	FALSE	FALSE	FALSE	FALSE	FALSE
chr13	26930382	26930500	LOC105370124	126217	0	1	0	TRUE	FALSE	FALSE	FALSE	FALSE	TRUE	FALSE	FALSE	FALSE	FALSE	FALSE	FALSE
chr13	26951963	26952444	LOC105370124	104455	1	0	0	FALSE	FALSE	TRUE	FALSE	FALSE	FALSE	FALSE	FALSE	FALSE	FALSE	FALSE	FALSE
chr13	26952756	26953179	LOC105370124	103691	1	0	0	FALSE	FALSE	TRUE	FALSE	FALSE	FALSE	FALSE	FALSE	FALSE	FALSE	FALSE	FALSE
chr13	26953231	26953374	LOC105370124	103356	1	0	0	FALSE	FALSE	TRUE	FALSE	FALSE	FALSE	FALSE	FALSE	FALSE	FALSE	FALSE	FALSE
chr13	26956257	26956594	LOC105370124	100233	1	0	0	FALSE	FALSE	TRUE	TRUE	FALSE	FALSE	FALSE	FALSE	FALSE	TRUE	FALSE	FALSE
chr13	26956828	26957084	LOC105370124	99702	1	0	0	FALSE	FALSE	TRUE	TRUE	FALSE	FALSE	FALSE	FALSE	FALSE	TRUE	FALSE	FALSE
chr13	26957090	26957548	LOC105370124	99339	1	0	0	TRUE	FALSE	TRUE	TRUE	FALSE	FALSE	FALSE	FALSE	FALSE	TRUE	FALSE	FALSE
chr13	26958086	26958204	LOC105370124	98513	0	1	0	TRUE	FALSE	FALSE	FALSE	FALSE	FALSE	FALSE	FALSE	FALSE	FALSE	FALSE	FALSE
chr13	26961911	26962029	LOC105370124	94688	0	1	0	FALSE	FALSE	FALSE	TRUE	TRUE	FALSE	FALSE	FALSE	FALSE	FALSE	FALSE	FALSE
chr13	27039644	27041478	LOC105370124	16097	1	0	0	FALSE	FALSE	FALSE	TRUE	FALSE	FALSE	FALSE	FALSE	FALSE	FALSE	FALSE	FALSE
chr13	27170203	27171258	USP12	1051	1	0	0	TRUE	FALSE	FALSE	FALSE	FALSE	FALSE	FALSE	FALSE	FALSE	FALSE	FALSE	FALSE
chr13	27251554	27252527	RPL21	486	1	0	0	FALSE	FALSE	FALSE	TRUE	TRUE	TRUE	FALSE	FALSE	FALSE	TRUE	TRUE	FALSE
chr13	27383796	27383914	LOC105370126	-8843	0	1	0	TRUE	FALSE	FALSE	FALSE	FALSE	FALSE	FALSE	FALSE	FALSE	FALSE	FALSE	FALSE
chr13	27404300	27404418	GTF3A	-20184	0	1	0	TRUE	FALSE	FALSE	FALSE	FALSE	FALSE	FALSE	FALSE	FALSE	FALSE	FALSE	FALSE
chr13	28138100	28138500	PAN3	0	0	0	1	TRUE	FALSE	FALSE	TRUE	FALSE	FALSE	FALSE	FALSE	FALSE	FALSE	FALSE	FALSE
chr13	28138505	28139174	PAN3	-124	1	0	0	FALSE	FALSE	FALSE	TRUE	FALSE	FALSE	FALSE	FALSE	FALSE	FALSE	FALSE	FALSE
chr13	29402317	29402435	MTUS2	-26263	0	1	0	FALSE	FALSE	FALSE	TRUE	FALSE	FALSE	FALSE	FALSE	FALSE	FALSE	FALSE	FALSE
chr13	29514807	29514925	MTUS2-AS1	-27116	0	1	0	TRUE	FALSE	FALSE	FALSE	FALSE	FALSE	FALSE	FALSE	FALSE	FALSE	FALSE	FALSE
chr13	29848636	29850683	UBL3	1024	1	0	0	TRUE	FALSE	TRUE	TRUE	FALSE	FALSE	FALSE	FALSE	FALSE	FALSE	FALSE	FALSE
chr13	30408089	30409080	LINC01058	13660	1	0	0	FALSE	FALSE	FALSE	TRUE	FALSE	TRUE	FALSE	FALSE	FALSE	FALSE	FALSE	FALSE
chr13	31846782	31847280	EEF1DP3	249	1	0	0	FALSE	FALSE	FALSE	TRUE	FALSE	FALSE	FALSE	FALSE	FALSE	FALSE	FALSE	FALSE
chr13	33818271	33818389	RFC3	262	0	1	0	FALSE	FALSE	FALSE	TRUE	TRUE	TRUE	FALSE	FALSE	FALSE	TRUE	TRUE	TRUE
chr13	34942286	34943656	NBEA	685	1	0	0	FALSE	FALSE	FALSE	TRUE	TRUE	FALSE	FALSE	FALSE	FALSE	TRUE	FALSE	FALSE
chr13	37000540	37001222	EXOSC8	341	0	1	0	FALSE	FALSE	FALSE	TRUE	TRUE	TRUE	FALSE	FALSE	FALSE	FALSE	FALSE	FALSE
chr13	37059531	37059649	SUPT20H	-22	0	1	0	FALSE	FALSE	FALSE	TRUE	FALSE	FALSE	FALSE	FALSE	FALSE	FALSE	FALSE	FALSE
chr13	38914192	38914310	STOML3	62517	0	1	0	TRUE	FALSE	FALSE	FALSE	FALSE	FALSE	FALSE	FALSE	FALSE	FALSE	FALSE	FALSE
chr13	39602284	39603219	LHFP	422	1	0	0	TRUE	FALSE	FALSE	FALSE	FALSE	FALSE	FALSE	FALSE	FALSE	FALSE	FALSE	FALSE
chr13	39655647	39655765	COG6	30	0	1	0	FALSE	FALSE	TRUE	TRUE	TRUE	TRUE	FALSE	FALSE	FALSE	FALSE	FALSE	FALSE
chr13	40457195	40457386	LINC00598	23716	1	0	0	FALSE	FALSE	FALSE	TRUE	FALSE	FALSE	FALSE	FALSE	FALSE	FALSE	FALSE	FALSE
chr13	40789934	40790052	SLC25A15	583	0	1	0	TRUE	FALSE	FALSE	FALSE	FALSE	FALSE	FALSE	FALSE	FALSE	FALSE	FALSE	FALSE
chr13	41020372	41020485	ELF1	-1018	1	0	0	TRUE	FALSE	FALSE	FALSE	FALSE	FALSE	FALSE	FALSE	FALSE	FALSE	FALSE	FALSE
chr13	41263270	41263670	MTRF1	0	0	0	1	TRUE	FALSE	FALSE	FALSE	TRUE	FALSE	FALSE	FALSE	FALSE	FALSE	FALSE	FALSE
chr13	41311165	41311565	NAA16	0	0	0	1	TRUE	FALSE	FALSE	FALSE	FALSE	FALSE	FALSE	FALSE	FALSE	FALSE	FALSE	FALSE
chr13	41346434	41346552	NAA16	17744	0	1	0	TRUE	FALSE	FALSE	FALSE	FALSE	FALSE	FALSE	FALSE	FALSE	FALSE	FALSE	FALSE
chr13	41611519	41611637	MIR5006	-43183	0	1	0	FALSE	FALSE	TRUE	FALSE	FALSE	FALSE	FALSE	FALSE	FALSE	FALSE	FALSE	FALSE
chr13	41668289	41668407	MIR5006	-99953	0	1	0	TRUE	FALSE	FALSE	FALSE	FALSE	FALSE	FALSE	FALSE	FALSE	FALSE	FALSE	FALSE
chr13	43399964	43400208	ENOX1-AS2	-48765	1	0	0	FALSE	FALSE	FALSE	TRUE	FALSE	FALSE	FALSE	FALSE	FALSE	FALSE	FALSE	FALSE
chr13	43431182	43431385	ENOX1-AS2	-17568	1	0	0	TRUE	FALSE	FALSE	FALSE	FALSE	FALSE	FALSE	FALSE	FALSE	FALSE	FALSE	FALSE
chr13	43431726	43432011	ENOX1-AS2	-16983	1	0	0	TRUE	FALSE	FALSE	FALSE	FALSE	FALSE	FALSE	FALSE	FALSE	FALSE	FALSE	FALSE
chr13	43785560	43786980	ENOX1	701	1	0	0	FALSE	TRUE	FALSE	TRUE	FALSE	FALSE	FALSE	FALSE	FALSE	TRUE	FALSE	FALSE
chr13	44989160	44989560	NUFIP1	0	0	0	1	FALSE	FALSE	FALSE	TRUE	FALSE	FALSE	FALSE	FALSE	FALSE	FALSE	FALSE	FALSE
chr13	44989173	44989291	NUFIP1	246	0	1	0	FALSE	FALSE	FALSE	TRUE	TRUE	TRUE	FALSE	FALSE	FALSE	TRUE	TRUE	FALSE
chr13	45047449	45047567	LOC105370188	506	0	1	0	TRUE	FALSE	FALSE	FALSE	FALSE	FALSE	FALSE	FALSE	FALSE	FALSE	FALSE	FALSE
chr13	45340553	45340671	TPT1	672	0	1	0	TRUE	FALSE	FALSE	FALSE	TRUE	FALSE	FALSE	FALSE	FALSE	FALSE	FALSE	FALSE
chr13	45341234	45341352	TPT1	-9	0	1	0	TRUE	FALSE	FALSE	FALSE	TRUE	FALSE	TRUE	FALSE	FALSE	FALSE	FALSE	FALSE
chr13	45464846	45465246	COG3	0	0	0	1	FALSE	FALSE	FALSE	TRUE	TRUE	TRUE	FALSE	FALSE	FALSE	FALSE	FALSE	FALSE
chr13	45465118	45465236	COG3	211	0	1	0	FALSE	FALSE	FALSE	FALSE	TRUE	TRUE	FALSE	FALSE	FALSE	FALSE	FALSE	FALSE
chr13	46159934	46160052	LCP1	8581	0	1	0	TRUE	FALSE	FALSE	FALSE	FALSE	FALSE	FALSE	FALSE	FALSE	FALSE	FALSE	FALSE
chr13	46181883	46182001	LCP1	382	0	1	0	FALSE	FALSE	FALSE	TRUE	FALSE	FALSE	FALSE	FALSE	FALSE	FALSE	FALSE	FALSE
chr13	46728972	46729090	LOC107984563	-31123	0	1	0	FALSE	FALSE	FALSE	FALSE	TRUE	FALSE	FALSE	FALSE	FALSE	FALSE	FALSE	FALSE
chr13	48094812	48095212	MED4	0	0	0	1	FALSE	FALSE	FALSE	TRUE	TRUE	FALSE	FALSE	FALSE	FALSE	FALSE	FALSE	FALSE
chr13	48095184	48095302	MED4	-102	0	1	0	FALSE	FALSE	FALSE	TRUE	FALSE	FALSE	FALSE	FALSE	FALSE	TRUE	FALSE	FALSE
chr13	48531580	48533256	RCBTB2	710	1	0	0	FALSE	FALSE	FALSE	TRUE	TRUE	TRUE	FALSE	FALSE	FALSE	FALSE	FALSE	FALSE
chr13	49247961	49248079	CDADC1	102	0	1	0	FALSE	FALSE	FALSE	FALSE	TRUE	FALSE	FALSE	FALSE	FALSE	FALSE	FALSE	FALSE
chr13	49625101	49625219	ARL11	-3138	0	1	0	TRUE	FALSE	FALSE	FALSE	FALSE	FALSE	FALSE	FALSE	FALSE	FALSE	FALSE	FALSE
chr13	49625420	49625538	ARL11	-2819	0	1	0	TRUE	FALSE	FALSE	FALSE	FALSE	FALSE	FALSE	FALSE	FALSE	FALSE	FALSE	FALSE
chr13	50123397	50125541	DLEU2	1072	1	0	0	TRUE	FALSE	FALSE	FALSE	FALSE	FALSE	TRUE	FALSE	FALSE	FALSE	FALSE	FALSE
chr13	51066128	51066246	GUCY1B2	-30	0	1	0	TRUE	FALSE	FALSE	FALSE	FALSE	FALSE	FALSE	FALSE	FALSE	FALSE	FALSE	FALSE
chr13	51148306	51148424	LINC00371	23857	0	1	0	FALSE	FALSE	FALSE	TRUE	FALSE	FALSE	FALSE	FALSE	FALSE	FALSE	FALSE	FALSE
chr13	51451233	51452344	INTS6	904	1	0	0	FALSE	FALSE	FALSE	TRUE	FALSE	TRUE	FALSE	FALSE	FALSE	FALSE	FALSE	FALSE
chr13	51803092	51804162	DHRS12	535	1	0	0	TRUE	FALSE	FALSE	TRUE	FALSE	FALSE	FALSE	FALSE	FALSE	FALSE	FALSE	FALSE
chr13	52012494	52012831	ALG11	276	1	0	0	FALSE	FALSE	FALSE	TRUE	TRUE	TRUE	FALSE	FALSE	FALSE	FALSE	TRUE	FALSE
chr13	52449405	52450244	VPS36	420	1	0	0	FALSE	FALSE	FALSE	TRUE	FALSE	FALSE	FALSE	FALSE	FALSE	FALSE	FALSE	FALSE
chr13	52450332	52450732	VPS36	0	0	0	1	FALSE	FALSE	FALSE	TRUE	TRUE	TRUE	FALSE	FALSE	FALSE	TRUE	FALSE	TRUE
chr13	52450724	52450842	VPS36	-105	0	1	0	FALSE	FALSE	FALSE	TRUE	FALSE	FALSE	FALSE	FALSE	FALSE	FALSE	FALSE	FALSE
chr13	57633561	57633679	PCDH17	1966	0	1	0	TRUE	FALSE	FALSE	FALSE	TRUE	FALSE	FALSE	FALSE	FALSE	FALSE	FALSE	FALSE
chr13	60397292	60398688	TDRD3	698	1	0	0	TRUE	FALSE	FALSE	FALSE	FALSE	FALSE	FALSE	FALSE	FALSE	FALSE	FALSE	FALSE
chr13	71067305	71067423	LINC00348	52224	0	1	0	TRUE	FALSE	FALSE	FALSE	FALSE	FALSE	FALSE	FALSE	FALSE	FALSE	FALSE	FALSE
chr13	73399121	73399363	LOC105377816	126923	1	0	0	TRUE	FALSE	FALSE	FALSE	FALSE	FALSE	FALSE	FALSE	FALSE	FALSE	FALSE	FALSE
chr13	73722305	73722423	LINC00393	-51907	0	1	0	TRUE	FALSE	FALSE	FALSE	FALSE	FALSE	FALSE	FALSE	FALSE	FALSE	FALSE	FALSE
chr13	73745150	73745268	LINC00393	-74752	0	1	0	TRUE	FALSE	FALSE	FALSE	FALSE	FALSE	FALSE	FALSE	FALSE	FALSE	FALSE	FALSE
chr13	75549680	75550080	UCHL3	0	0	0	1	FALSE	FALSE	FALSE	FALSE	FALSE	TRUE	FALSE	FALSE	FALSE	FALSE	FALSE	FALSE
chr13	76884217	76884559	KCTD12	2017	1	0	0	FALSE	FALSE	FALSE	TRUE	TRUE	FALSE	FALSE	FALSE	FALSE	FALSE	FALSE	FALSE
chr13	76884601	76884911	KCTD12	1649	1	0	0	TRUE	FALSE	FALSE	TRUE	TRUE	FALSE	FALSE	FALSE	FALSE	FALSE	FALSE	FALSE
chr13	76885056	76886405	KCTD12	675	1	0	0	TRUE	FALSE	TRUE	TRUE	TRUE	FALSE	TRUE	FALSE	FALSE	TRUE	FALSE	FALSE
chr13	76991923	76993311	CLN5	681	0	1	0	TRUE	FALSE	FALSE	FALSE	FALSE	FALSE	TRUE	FALSE	FALSE	FALSE	FALSE	FALSE
chr13	77026281	77026399	FBXL3	824	0	1	0	TRUE	FALSE	FALSE	FALSE	FALSE	FALSE	FALSE	FALSE	FALSE	FALSE	FALSE	FALSE
chr13	79405924	79406324	RBM26	0	0	0	1	TRUE	FALSE	FALSE	FALSE	FALSE	FALSE	FALSE	FALSE	FALSE	FALSE	FALSE	FALSE
chr13	90696381	90696852	LOC107984572	13183	1	0	0	FALSE	FALSE	FALSE	FALSE	TRUE	FALSE	FALSE	FALSE	FALSE	FALSE	FALSE	FALSE
chr13	94433589	94433707	DCT	46034	0	1	0	TRUE	FALSE	FALSE	FALSE	FALSE	FALSE	FALSE	FALSE	FALSE	FALSE	FALSE	FALSE
chr13	94601774	94602174	GPR180	0	0	0	1	TRUE	FALSE	FALSE	TRUE	FALSE	FALSE	FALSE	FALSE	FALSE	FALSE	FALSE	FALSE
chr13	95478639	95478757	CLDN10	45100	0	1	0	TRUE	FALSE	FALSE	FALSE	FALSE	FALSE	FALSE	FALSE	FALSE	FALSE	FALSE	FALSE
chr13	95615033	95615151	DZIP1	18217	0	1	0	FALSE	TRUE	FALSE	FALSE	FALSE	FALSE	FALSE	FALSE	FALSE	FALSE	FALSE	FALSE
chr13	96053348	96053466	UGGT2	-6	0	1	0	FALSE	FALSE	FALSE	TRUE	FALSE	TRUE	FALSE	FALSE	FALSE	TRUE	FALSE	FALSE
chr13	96076101	96076219	HS6ST3	-14473	0	1	0	FALSE	FALSE	FALSE	TRUE	TRUE	FALSE	FALSE	FALSE	FALSE	FALSE	FALSE	FALSE
chr13	96984368	96984486	LINC00359	-255	0	1	0	FALSE	TRUE	FALSE	FALSE	FALSE	FALSE	FALSE	FALSE	FALSE	FALSE	FALSE	FALSE
chr13	97975505	97977874	IPO5	16338	1	0	0	TRUE	FALSE	FALSE	TRUE	FALSE	FALSE	FALSE	FALSE	FALSE	TRUE	FALSE	FALSE
chr13	97976576	97976976	IPO5	0	0	0	1	FALSE	FALSE	FALSE	TRUE	FALSE	FALSE	FALSE	FALSE	FALSE	FALSE	FALSE	FALSE
chr13	98142995	98143395	FARP1	0	0	0	1	FALSE	FALSE	TRUE	TRUE	TRUE	FALSE	FALSE	FALSE	FALSE	FALSE	FALSE	FALSE
chr13	98405414	98405532	LOC105370327	83224	0	1	0	TRUE	FALSE	FALSE	FALSE	FALSE	FALSE	FALSE	FALSE	FALSE	FALSE	FALSE	FALSE
chr13	98576806	98577206	STK24	0	0	0	1	FALSE	FALSE	TRUE	FALSE	FALSE	FALSE	FALSE	FALSE	FALSE	FALSE	FALSE	FALSE
chr13	98751639	98752675	SLC15A1	518	1	0	0	TRUE	FALSE	FALSE	FALSE	TRUE	FALSE	FALSE	FALSE	FALSE	FALSE	FALSE	FALSE
chr13	99426398	99426516	LOC107984558	6879	0	1	0	FALSE	FALSE	FALSE	TRUE	FALSE	FALSE	FALSE	FALSE	FALSE	FALSE	FALSE	FALSE
chr13	99980044	99980771	ZIC2	-1364	1	0	0	FALSE	FALSE	FALSE	TRUE	FALSE	FALSE	FALSE	FALSE	FALSE	FALSE	FALSE	FALSE
chr13	99981771	99982661	ZIC2	216	1	0	0	FALSE	FALSE	FALSE	TRUE	TRUE	FALSE	FALSE	FALSE	FALSE	FALSE	FALSE	FALSE
chr13	99982814	99983059	ZIC2	936	1	0	0	FALSE	FALSE	FALSE	TRUE	FALSE	FALSE	FALSE	FALSE	FALSE	FALSE	FALSE	FALSE
chr13	99983176	99983520	ZIC2	1348	1	0	0	FALSE	FALSE	FALSE	TRUE	FALSE	FALSE	FALSE	FALSE	FALSE	FALSE	FALSE	FALSE
chr14	100147210	100147328	DEGS2	12406	0	1	0	TRUE	FALSE	FALSE	FALSE	FALSE	FALSE	FALSE	FALSE	FALSE	FALSE	FALSE	FALSE
chr14	100147631	100147749	DEGS2	11985	0	1	0	TRUE	FALSE	FALSE	FALSE	FALSE	FALSE	FALSE	FALSE	FALSE	FALSE	FALSE	FALSE
chr14	100151307	100151425	DEGS2	8309	0	1	0	FALSE	FALSE	FALSE	TRUE	FALSE	FALSE	FALSE	FALSE	FALSE	FALSE	FALSE	FALSE
chr14	100165517	100165635	DEGS2	1310	0	1	0	TRUE	FALSE	FALSE	FALSE	FALSE	FALSE	TRUE	FALSE	FALSE	FALSE	FALSE	FALSE
chr14	100213850	100215661	YY1	-24009	1	0	0	TRUE	FALSE	FALSE	FALSE	FALSE	FALSE	FALSE	FALSE	FALSE	FALSE	FALSE	FALSE
chr14	100281376	100281494	MIR6764	4079	0	1	0	FALSE	TRUE	FALSE	FALSE	FALSE	FALSE	FALSE	FALSE	FALSE	FALSE	FALSE	FALSE
chr14	100284989	100286155	MIR6764	8216	0	1	0	FALSE	FALSE	TRUE	FALSE	TRUE	FALSE	FALSE	FALSE	FALSE	FALSE	FALSE	FALSE
chr14	100303237	100303355	SLC25A29	2480	0	1	0	FALSE	FALSE	FALSE	TRUE	FALSE	FALSE	FALSE	FALSE	FALSE	TRUE	FALSE	FALSE
chr14	100306141	100306541	SLC25A29	0	0	0	1	FALSE	FALSE	FALSE	TRUE	FALSE	FALSE	FALSE	FALSE	FALSE	FALSE	FALSE	FALSE
chr14	100376354	100376754	WDR25	0	0	0	1	FALSE	FALSE	FALSE	FALSE	TRUE	FALSE	FALSE	FALSE	FALSE	FALSE	FALSE	FALSE
chr14	100782943	100783191	MIR2392	-31423	1	0	0	FALSE	FALSE	FALSE	TRUE	FALSE	FALSE	FALSE	FALSE	FALSE	FALSE	FALSE	FALSE
chr14	101947562	101949197	DYNC1H1	-16148	0	1	0	TRUE	FALSE	FALSE	TRUE	FALSE	FALSE	FALSE	FALSE	FALSE	FALSE	FALSE	FALSE
chr14	101964471	101964871	DYNC1H1	0	0	0	1	FALSE	FALSE	FALSE	TRUE	TRUE	TRUE	FALSE	FALSE	FALSE	FALSE	FALSE	FALSE
chr14	101964527	101965850	DYNC1H1	661	1	0	0	FALSE	FALSE	TRUE	TRUE	TRUE	TRUE	FALSE	FALSE	FALSE	TRUE	TRUE	TRUE
chr14	101965884	101966317	DYNC1H1	1573	1	0	0	FALSE	FALSE	TRUE	FALSE	FALSE	FALSE	FALSE	FALSE	FALSE	FALSE	FALSE	FALSE
chr14	102319650	102320050	ZNF839	0	0	0	1	FALSE	FALSE	FALSE	TRUE	FALSE	FALSE	FALSE	FALSE	FALSE	FALSE	FALSE	FALSE
chr14	102421791	102421909	CINP	-58934	0	1	0	TRUE	FALSE	FALSE	FALSE	FALSE	FALSE	FALSE	FALSE	FALSE	FALSE	FALSE	FALSE
chr14	102510054	102510172	LOC105370679	71	0	1	0	TRUE	FALSE	FALSE	FALSE	FALSE	FALSE	FALSE	FALSE	FALSE	FALSE	FALSE	FALSE
chr14	102516378	102518611	LOC105370680	28	0	1	0	FALSE	FALSE	TRUE	TRUE	FALSE	FALSE	FALSE	FALSE	FALSE	FALSE	FALSE	FALSE
chr14	102524594	102524712	LOC105370680	692	0	1	0	FALSE	FALSE	FALSE	TRUE	FALSE	FALSE	FALSE	FALSE	FALSE	TRUE	FALSE	FALSE
chr14	102592539	102592939	RCOR1	0	0	0	1	FALSE	FALSE	FALSE	TRUE	TRUE	FALSE	FALSE	FALSE	FALSE	FALSE	FALSE	FALSE
chr14	102592658	102593867	RCOR1	604	1	0	0	FALSE	FALSE	TRUE	TRUE	TRUE	FALSE	FALSE	FALSE	FALSE	TRUE	TRUE	FALSE
chr14	102777478	102778766	TRAF3	620	1	0	0	FALSE	FALSE	FALSE	TRUE	FALSE	FALSE	FALSE	FALSE	FALSE	FALSE	FALSE	FALSE
chr14	102927461	102927693	AMN	4656	1	0	0	TRUE	FALSE	FALSE	FALSE	FALSE	FALSE	FALSE	FALSE	FALSE	FALSE	FALSE	FALSE
chr14	102927788	102931007	AMN	6476	1	0	0	TRUE	FALSE	FALSE	FALSE	FALSE	FALSE	TRUE	FALSE	FALSE	FALSE	FALSE	FALSE
chr14	102949236	102949354	AMN	26374	0	1	0	TRUE	FALSE	FALSE	FALSE	FALSE	FALSE	FALSE	FALSE	FALSE	FALSE	FALSE	FALSE
chr14	103031991	103032109	CDC42BPB	25185	0	1	0	TRUE	FALSE	FALSE	FALSE	TRUE	FALSE	FALSE	FALSE	FALSE	FALSE	FALSE	FALSE
chr14	103057243	103057643	CDC42BPB	0	0	0	1	FALSE	FALSE	TRUE	FALSE	FALSE	FALSE	FALSE	FALSE	FALSE	FALSE	FALSE	FALSE
chr14	103074118	103076084	LOC107984640	-9108	0	1	0	FALSE	FALSE	FALSE	TRUE	TRUE	FALSE	FALSE	FALSE	FALSE	FALSE	FALSE	FALSE
chr14	103085753	103085871	LOC107984640	1603	0	1	0	TRUE	FALSE	FALSE	FALSE	FALSE	FALSE	FALSE	FALSE	FALSE	FALSE	FALSE	FALSE
chr14	103109692	103111930	EXOC3L4	10288	1	0	0	FALSE	FALSE	FALSE	TRUE	TRUE	FALSE	FALSE	FALSE	FALSE	FALSE	FALSE	FALSE
chr14	103112290	103113228	TNFAIP2	-8415	1	0	0	FALSE	FALSE	FALSE	TRUE	FALSE	FALSE	FALSE	FALSE	FALSE	FALSE	FALSE	FALSE
chr14	103385305	103385705	MARK3	0	0	0	1	TRUE	FALSE	FALSE	FALSE	FALSE	FALSE	FALSE	FALSE	FALSE	FALSE	FALSE	FALSE
chr14	103385363	103386556	MARK3	-20	1	0	0	FALSE	FALSE	TRUE	FALSE	FALSE	FALSE	FALSE	FALSE	FALSE	FALSE	FALSE	FALSE
chr14	103513472	103513590	CKB	9302	0	1	0	TRUE	FALSE	FALSE	FALSE	FALSE	FALSE	FALSE	FALSE	FALSE	FALSE	FALSE	FALSE
chr14	103518567	103519034	CKB	4033	0	1	0	TRUE	FALSE	FALSE	TRUE	FALSE	FALSE	FALSE	FALSE	FALSE	FALSE	FALSE	FALSE
chr14	103519040	103519738	CKB	3444	1	0	0	TRUE	FALSE	FALSE	TRUE	FALSE	FALSE	FALSE	FALSE	FALSE	FALSE	FALSE	FALSE
chr14	103519768	103520152	CKB	2873	1	0	0	FALSE	FALSE	TRUE	TRUE	FALSE	FALSE	FALSE	FALSE	FALSE	FALSE	FALSE	FALSE
chr14	103520593	103522538	CKB	1268	0	1	0	TRUE	FALSE	TRUE	TRUE	TRUE	FALSE	FALSE	FALSE	FALSE	FALSE	TRUE	FALSE
chr14	103529086	103529486	TRMT61A	0	0	0	1	FALSE	FALSE	FALSE	TRUE	FALSE	FALSE	FALSE	FALSE	FALSE	FALSE	FALSE	FALSE
chr14	103715162	103715562	XRCC3	0	0	0	1	FALSE	FALSE	FALSE	TRUE	FALSE	FALSE	FALSE	FALSE	FALSE	FALSE	FALSE	FALSE
chr14	103736182	103736442	PPP1R13B	15956	1	0	0	FALSE	FALSE	FALSE	TRUE	FALSE	FALSE	FALSE	FALSE	FALSE	FALSE	FALSE	FALSE
chr14	103736518	103736740	PPP1R13B	15639	1	0	0	FALSE	FALSE	FALSE	TRUE	FALSE	FALSE	FALSE	FALSE	FALSE	FALSE	FALSE	FALSE
chr14	104078195	104078395	LOC105370691	-1642	1	0	0	TRUE	FALSE	FALSE	FALSE	FALSE	FALSE	FALSE	FALSE	FALSE	FALSE	FALSE	FALSE
chr14	104665849	104665967	LOC101929634	-350	0	1	0	FALSE	FALSE	FALSE	TRUE	FALSE	FALSE	FALSE	FALSE	FALSE	FALSE	FALSE	FALSE
chr14	104681076	104681194	MIR4710	-3386	0	1	0	FALSE	FALSE	FALSE	TRUE	FALSE	FALSE	FALSE	FALSE	FALSE	FALSE	FALSE	FALSE
chr14	104681455	104681573	MIR4710	-3765	0	1	0	FALSE	FALSE	FALSE	TRUE	FALSE	FALSE	FALSE	FALSE	FALSE	FALSE	FALSE	FALSE
chr14	104731291	104731409	ADSSL1	1473	0	1	0	TRUE	FALSE	FALSE	FALSE	FALSE	FALSE	TRUE	FALSE	FALSE	FALSE	FALSE	FALSE
chr14	104753088	104753488	SIVA1	0	0	0	1	FALSE	FALSE	FALSE	TRUE	TRUE	TRUE	FALSE	FALSE	FALSE	FALSE	FALSE	FALSE
chr14	104774319	104774437	LOC102723342	6413	0	1	0	FALSE	FALSE	FALSE	TRUE	FALSE	FALSE	FALSE	FALSE	FALSE	FALSE	FALSE	FALSE
chr14	104774813	104774931	LOC102723342	6907	0	1	0	FALSE	FALSE	FALSE	TRUE	FALSE	FALSE	FALSE	FALSE	FALSE	FALSE	FALSE	FALSE
chr14	104784818	104785251	AKT1	8567	1	0	0	FALSE	FALSE	FALSE	TRUE	FALSE	FALSE	FALSE	FALSE	FALSE	FALSE	FALSE	FALSE
chr14	104787742	104788102	AKT1	5679	1	0	0	FALSE	FALSE	FALSE	TRUE	TRUE	TRUE	FALSE	FALSE	FALSE	FALSE	FALSE	FALSE
chr14	104788211	104788440	AKT1	5276	1	0	0	FALSE	FALSE	FALSE	TRUE	TRUE	TRUE	FALSE	FALSE	FALSE	FALSE	FALSE	FALSE
chr14	104792106	104792831	AKT1	1133	1	0	0	TRUE	FALSE	FALSE	FALSE	FALSE	FALSE	FALSE	FALSE	FALSE	FALSE	FALSE	FALSE
chr14	104800476	104800876	ZBTB42	0	0	0	1	FALSE	FALSE	FALSE	TRUE	FALSE	FALSE	FALSE	FALSE	FALSE	TRUE	FALSE	FALSE
chr14	104801180	104801677	ZBTB42	248	1	0	0	FALSE	FALSE	FALSE	TRUE	FALSE	TRUE	FALSE	FALSE	FALSE	TRUE	FALSE	FALSE
chr14	104803752	104804299	ZBTB42	2845	1	0	0	FALSE	FALSE	FALSE	TRUE	FALSE	FALSE	FALSE	FALSE	FALSE	TRUE	FALSE	FALSE
chr14	104825701	104828072	LINC00638	5686	1	0	0	TRUE	FALSE	FALSE	FALSE	FALSE	FALSE	FALSE	FALSE	FALSE	FALSE	FALSE	FALSE
chr14	104967105	104969471	AHNAK2	2195	1	0	0	TRUE	FALSE	FALSE	TRUE	FALSE	FALSE	FALSE	FALSE	FALSE	FALSE	FALSE	FALSE
chr14	104972187	104974147	AHNAK2	-2684	1	0	0	TRUE	FALSE	FALSE	FALSE	FALSE	FALSE	FALSE	FALSE	FALSE	FALSE	FALSE	FALSE
chr14	105166631	105166843	JAG2	1744	1	0	0	TRUE	FALSE	FALSE	FALSE	FALSE	FALSE	FALSE	FALSE	FALSE	FALSE	FALSE	FALSE
chr14	105167095	105168824	JAG2	522	1	0	0	TRUE	FALSE	FALSE	TRUE	TRUE	FALSE	TRUE	FALSE	FALSE	FALSE	FALSE	FALSE
chr14	105300704	105301104	BRF1	0	0	0	1	FALSE	FALSE	FALSE	TRUE	TRUE	TRUE	FALSE	FALSE	FALSE	TRUE	TRUE	FALSE
chr14	105314414	105315577	PACS2	246	1	0	0	FALSE	FALSE	FALSE	FALSE	TRUE	TRUE	FALSE	FALSE	FALSE	FALSE	FALSE	FALSE
chr14	105410926	105412222	LOC100507437	8165	1	0	0	FALSE	FALSE	FALSE	TRUE	TRUE	FALSE	FALSE	FALSE	FALSE	FALSE	FALSE	FALSE
chr14	105419750	105420150	MTA1	0	0	0	1	TRUE	FALSE	FALSE	FALSE	FALSE	FALSE	FALSE	FALSE	FALSE	FALSE	FALSE	FALSE
chr14	105466533	105466841	CRIP2	-6250	1	0	0	TRUE	FALSE	FALSE	FALSE	FALSE	FALSE	FALSE	FALSE	FALSE	FALSE	FALSE	FALSE
chr14	105467188	105469322	CRIP2	-4682	1	0	0	TRUE	FALSE	FALSE	FALSE	FALSE	FALSE	FALSE	FALSE	FALSE	FALSE	FALSE	FALSE
chr14	105474720	105475120	CRIP2	0	0	0	1	FALSE	FALSE	FALSE	TRUE	FALSE	FALSE	FALSE	FALSE	FALSE	FALSE	FALSE	FALSE
chr14	105475408	105475526	CRIP2	-391	0	1	0	FALSE	FALSE	FALSE	TRUE	TRUE	FALSE	FALSE	FALSE	FALSE	FALSE	FALSE	FALSE
chr14	105479017	105479356	CRIP2	1941	1	0	0	TRUE	FALSE	FALSE	FALSE	FALSE	FALSE	FALSE	FALSE	FALSE	FALSE	FALSE	FALSE
chr14	105483330	105483722	CRIP1	-3393	1	0	0	FALSE	FALSE	FALSE	FALSE	TRUE	TRUE	FALSE	FALSE	FALSE	FALSE	FALSE	FALSE
chr14	105490693	105490811	C14orf80	-496	0	1	0	FALSE	FALSE	FALSE	TRUE	TRUE	TRUE	FALSE	FALSE	FALSE	FALSE	FALSE	TRUE
chr14	105491176	105491576	C14orf80	0	0	0	1	FALSE	FALSE	FALSE	TRUE	FALSE	FALSE	FALSE	FALSE	FALSE	FALSE	FALSE	FALSE
chr14	105491248	105492023	C14orf80	387	1	0	0	FALSE	FALSE	FALSE	FALSE	TRUE	TRUE	FALSE	FALSE	FALSE	FALSE	FALSE	TRUE
chr14	105493570	105493688	C14orf80	2381	0	1	0	TRUE	FALSE	FALSE	FALSE	FALSE	FALSE	FALSE	FALSE	FALSE	FALSE	FALSE	FALSE
chr14	105526199	105526317	TMEM121	-357	0	1	0	TRUE	FALSE	FALSE	TRUE	FALSE	FALSE	FALSE	FALSE	FALSE	FALSE	FALSE	FALSE
chr14	105526348	105526466	TMEM121	-208	0	1	0	TRUE	FALSE	FALSE	TRUE	FALSE	FALSE	FALSE	FALSE	FALSE	FALSE	FALSE	FALSE
chr14	105526615	105527426	TMEM121	227	1	0	0	TRUE	FALSE	FALSE	TRUE	FALSE	FALSE	FALSE	FALSE	FALSE	TRUE	FALSE	FALSE
chr14	105527912	105529897	TMEM121	2111	0	1	0	TRUE	FALSE	FALSE	TRUE	FALSE	FALSE	FALSE	FALSE	FALSE	FALSE	FALSE	FALSE
chr14	20305258	20305994	TTC5	368	1	0	0	FALSE	FALSE	TRUE	FALSE	FALSE	FALSE	FALSE	FALSE	FALSE	FALSE	FALSE	FALSE
chr14	20681112	20682246	ANG	-2497	1	0	0	FALSE	FALSE	FALSE	TRUE	FALSE	FALSE	FALSE	FALSE	FALSE	FALSE	FALSE	FALSE
chr14	20682280	20683176	ANG	-1448	1	0	0	FALSE	FALSE	FALSE	TRUE	FALSE	FALSE	FALSE	FALSE	FALSE	FALSE	FALSE	FALSE
chr14	20971523	20971641	RNASE2	16112	0	1	0	TRUE	FALSE	FALSE	FALSE	FALSE	FALSE	FALSE	FALSE	FALSE	FALSE	FALSE	FALSE
chr14	20989888	20990288	METTL17	0	0	0	1	FALSE	FALSE	FALSE	TRUE	TRUE	FALSE	FALSE	FALSE	FALSE	FALSE	TRUE	FALSE
chr14	20990404	20990522	METTL17	234	0	1	0	FALSE	FALSE	FALSE	TRUE	TRUE	FALSE	FALSE	FALSE	FALSE	TRUE	TRUE	FALSE
chr14	21014810	21014928	NDRG2	6218	0	1	0	TRUE	FALSE	FALSE	FALSE	FALSE	FALSE	FALSE	FALSE	FALSE	FALSE	FALSE	FALSE
chr14	21098324	21098724	ZNF219	0	0	0	1	TRUE	FALSE	FALSE	FALSE	FALSE	FALSE	FALSE	FALSE	FALSE	FALSE	FALSE	FALSE
chr14	21103364	21104704	ZNF219	670	1	0	0	TRUE	FALSE	FALSE	FALSE	FALSE	FALSE	FALSE	FALSE	FALSE	FALSE	FALSE	FALSE
chr14	21269130	21269530	HNRNPC	0	0	0	1	FALSE	FALSE	FALSE	TRUE	TRUE	TRUE	FALSE	FALSE	FALSE	FALSE	FALSE	FALSE
chr14	21734607	21734725	LOC107984650	-22346	0	1	0	FALSE	FALSE	TRUE	FALSE	FALSE	FALSE	FALSE	FALSE	FALSE	FALSE	FALSE	FALSE
chr14	22132207	22132325	LOC107984649	158468	0	1	0	TRUE	FALSE	FALSE	FALSE	FALSE	FALSE	FALSE	FALSE	FALSE	FALSE	FALSE	FALSE
chr14	22389358	22389539	LOC105370402	43301	1	0	0	FALSE	TRUE	FALSE	FALSE	FALSE	FALSE	FALSE	FALSE	FALSE	FALSE	FALSE	FALSE
chr14	22871750	22873277	LRP10	763	1	0	0	FALSE	FALSE	FALSE	TRUE	FALSE	FALSE	FALSE	FALSE	FALSE	FALSE	FALSE	FALSE
chr14	22955844	22957029	MIR4707	593	1	0	0	FALSE	FALSE	FALSE	TRUE	TRUE	TRUE	FALSE	FALSE	FALSE	TRUE	TRUE	TRUE
chr14	22956784	22957184	HAUS4	0	0	0	1	FALSE	FALSE	FALSE	TRUE	TRUE	TRUE	FALSE	FALSE	FALSE	TRUE	TRUE	TRUE
chr14	23034159	23035145	PSMB5	488	1	0	0	FALSE	FALSE	FALSE	TRUE	TRUE	TRUE	FALSE	FALSE	FALSE	TRUE	TRUE	TRUE
chr14	23034593	23034993	PSMB5	0	0	0	1	FALSE	FALSE	FALSE	TRUE	TRUE	TRUE	FALSE	FALSE	FALSE	FALSE	FALSE	FALSE
chr14	23071708	23071826	ACIN1	-197	0	1	0	FALSE	FALSE	FALSE	TRUE	TRUE	FALSE	FALSE	FALSE	FALSE	FALSE	FALSE	FALSE
chr14	23094367	23094485	LOC107984665	-644	0	1	0	FALSE	FALSE	FALSE	TRUE	FALSE	FALSE	FALSE	FALSE	FALSE	FALSE	FALSE	FALSE
chr14	23094832	23095232	ACIN1	0	0	0	1	FALSE	FALSE	FALSE	TRUE	FALSE	FALSE	FALSE	FALSE	FALSE	FALSE	FALSE	FALSE
chr14	23114798	23114916	CEBPE	4754	0	1	0	TRUE	FALSE	FALSE	FALSE	FALSE	FALSE	FALSE	FALSE	FALSE	FALSE	FALSE	FALSE
chr14	23120884	23121002	CEBPE	-1332	0	1	0	FALSE	FALSE	FALSE	TRUE	FALSE	FALSE	FALSE	FALSE	FALSE	FALSE	FALSE	FALSE
chr14	23140226	23140344	SLC7A8	14165	0	1	0	FALSE	FALSE	FALSE	TRUE	FALSE	FALSE	FALSE	FALSE	FALSE	FALSE	FALSE	FALSE
chr14	23301047	23302848	PPP1R3E	901	1	0	0	FALSE	FALSE	FALSE	TRUE	FALSE	FALSE	FALSE	FALSE	FALSE	TRUE	FALSE	FALSE
chr14	23306874	23307274	BCL2L2-PABPN1	0	0	0	1	FALSE	FALSE	FALSE	TRUE	TRUE	TRUE	FALSE	FALSE	FALSE	FALSE	FALSE	FALSE
chr14	23320423	23322621	PABPN1	1335	1	0	0	FALSE	FALSE	TRUE	TRUE	TRUE	FALSE	FALSE	FALSE	FALSE	TRUE	FALSE	FALSE
chr14	23559600	23559718	LOC102724814	-1437	0	1	0	TRUE	FALSE	FALSE	FALSE	FALSE	FALSE	FALSE	FALSE	FALSE	FALSE	FALSE	FALSE
chr14	23562852	23562970	AP1G2	1667	0	1	0	FALSE	FALSE	FALSE	FALSE	FALSE	TRUE	FALSE	FALSE	FALSE	FALSE	FALSE	FALSE
chr14	24036411	24037255	DHRS4L1	350	1	0	0	TRUE	FALSE	FALSE	FALSE	FALSE	FALSE	FALSE	FALSE	FALSE	FALSE	FALSE	FALSE
chr14	24094280	24096025	NRL	-393	1	0	0	TRUE	FALSE	FALSE	FALSE	TRUE	FALSE	FALSE	FALSE	FALSE	FALSE	FALSE	FALSE
chr14	24136157	24136687	PSME1	265	1	0	0	TRUE	FALSE	FALSE	FALSE	FALSE	FALSE	FALSE	FALSE	FALSE	FALSE	FALSE	FALSE
chr14	24194636	24195736	TM9SF1	550	1	0	0	TRUE	FALSE	FALSE	FALSE	FALSE	FALSE	FALSE	FALSE	FALSE	FALSE	FALSE	FALSE
chr14	24241722	24242674	TINF2	407	1	0	0	FALSE	FALSE	FALSE	TRUE	FALSE	FALSE	FALSE	FALSE	FALSE	FALSE	FALSE	FALSE
chr14	24270812	24271627	LOC102725044	-8	1	0	0	FALSE	FALSE	FALSE	TRUE	TRUE	TRUE	FALSE	FALSE	FALSE	TRUE	TRUE	TRUE
chr14	24333520	24335071	ADCY4	776	1	0	0	FALSE	FALSE	FALSE	TRUE	FALSE	FALSE	FALSE	FALSE	FALSE	FALSE	FALSE	FALSE
chr14	24398916	24399316	NYNRIN	0	0	0	1	FALSE	FALSE	FALSE	TRUE	FALSE	FALSE	FALSE	FALSE	FALSE	FALSE	FALSE	FALSE
chr14	24407907	24408091	NYNRIN	-3457	1	0	0	FALSE	FALSE	FALSE	TRUE	TRUE	TRUE	FALSE	FALSE	FALSE	FALSE	FALSE	FALSE
chr14	24416361	24416479	NYNRIN	4964	0	1	0	FALSE	FALSE	FALSE	TRUE	FALSE	FALSE	FALSE	FALSE	FALSE	FALSE	FALSE	FALSE
chr14	24442471	24442589	SDR39U1	223	0	1	0	TRUE	FALSE	FALSE	FALSE	FALSE	FALSE	FALSE	FALSE	FALSE	FALSE	FALSE	FALSE
chr14	29926322	29927693	PRKD1	114	1	0	0	TRUE	FALSE	FALSE	FALSE	FALSE	FALSE	FALSE	FALSE	FALSE	FALSE	FALSE	FALSE
chr14	30874534	30875397	COCH	285	1	0	0	FALSE	FALSE	FALSE	TRUE	FALSE	FALSE	FALSE	FALSE	FALSE	FALSE	FALSE	FALSE
chr14	31419868	31419986	HEATR5A	655	0	1	0	FALSE	FALSE	FALSE	FALSE	TRUE	FALSE	FALSE	FALSE	FALSE	FALSE	FALSE	FALSE
chr14	31420069	31420187	HEATR5A	454	0	1	0	TRUE	FALSE	FALSE	FALSE	TRUE	FALSE	FALSE	FALSE	FALSE	FALSE	FALSE	FALSE
chr14	31420249	31420649	HEATR5A	0	0	0	1	TRUE	FALSE	FALSE	FALSE	FALSE	FALSE	FALSE	FALSE	FALSE	FALSE	FALSE	FALSE
chr14	31420367	31420485	HEATR5A	156	0	1	0	TRUE	FALSE	FALSE	FALSE	TRUE	FALSE	FALSE	FALSE	FALSE	FALSE	FALSE	FALSE
chr14	32076886	32077286	ARHGAP5	0	0	0	1	FALSE	FALSE	FALSE	TRUE	FALSE	FALSE	FALSE	FALSE	FALSE	FALSE	FALSE	FALSE
chr14	32077699	32078424	ARHGAP5	773	1	0	0	FALSE	FALSE	FALSE	TRUE	FALSE	FALSE	FALSE	FALSE	FALSE	TRUE	FALSE	FALSE
chr14	32078833	32079252	ARHGAP5	1754	1	0	0	FALSE	FALSE	FALSE	TRUE	FALSE	FALSE	FALSE	FALSE	FALSE	FALSE	FALSE	FALSE
chr14	32560400	32560518	AKAP6	-56245	0	1	0	TRUE	FALSE	FALSE	FALSE	FALSE	FALSE	FALSE	FALSE	FALSE	FALSE	FALSE	FALSE
chr14	33849334	33849452	EGLN3	101433	0	1	0	TRUE	FALSE	FALSE	FALSE	FALSE	FALSE	FALSE	FALSE	FALSE	FALSE	FALSE	FALSE
chr14	34059439	34061228	EGLN3-AS1	20640	1	0	0	TRUE	FALSE	TRUE	FALSE	FALSE	FALSE	FALSE	FALSE	FALSE	FALSE	FALSE	FALSE
chr14	34461795	34461913	SPTSSA	408	0	1	0	TRUE	FALSE	FALSE	FALSE	FALSE	FALSE	TRUE	FALSE	FALSE	FALSE	FALSE	FALSE
chr14	34539023	34539737	EAPP	336	0	1	0	FALSE	FALSE	FALSE	FALSE	TRUE	TRUE	FALSE	FALSE	FALSE	FALSE	TRUE	FALSE
chr14	34872851	34875647	BAZ1A	976	1	0	0	FALSE	FALSE	FALSE	FALSE	TRUE	FALSE	FALSE	FALSE	FALSE	FALSE	FALSE	FALSE
chr14	35331573	35332604	PSMA6	39131	1	0	0	FALSE	FALSE	FALSE	TRUE	FALSE	FALSE	FALSE	FALSE	FALSE	FALSE	FALSE	FALSE
chr14	35336370	35337316	PSMA6	43886	1	0	0	FALSE	FALSE	FALSE	TRUE	FALSE	FALSE	FALSE	FALSE	FALSE	TRUE	FALSE	FALSE
chr14	35337723	35338327	PSMA6	45068	1	0	0	TRUE	FALSE	FALSE	FALSE	FALSE	FALSE	FALSE	FALSE	FALSE	FALSE	FALSE	FALSE
chr14	35367080	35368514	NFKBIA	36957	1	0	0	TRUE	FALSE	FALSE	FALSE	FALSE	FALSE	TRUE	FALSE	FALSE	FALSE	FALSE	FALSE
chr14	35368638	35370579	NFKBIA	35146	1	0	0	TRUE	FALSE	FALSE	FALSE	FALSE	FALSE	FALSE	FALSE	FALSE	FALSE	FALSE	FALSE
chr14	35808619	35808737	RALGAPA1	332	0	1	0	TRUE	FALSE	FALSE	FALSE	FALSE	FALSE	FALSE	FALSE	FALSE	FALSE	FALSE	FALSE
chr14	35856323	35856441	BRMS1L	25690	0	1	0	FALSE	FALSE	FALSE	TRUE	FALSE	FALSE	FALSE	FALSE	FALSE	FALSE	FALSE	FALSE
chr14	36647211	36647329	PAX9	-10297	0	1	0	TRUE	FALSE	FALSE	FALSE	FALSE	FALSE	FALSE	FALSE	FALSE	FALSE	FALSE	FALSE
chr14	36648065	36648183	PAX9	-9443	0	1	0	TRUE	FALSE	FALSE	FALSE	FALSE	FALSE	TRUE	FALSE	FALSE	FALSE	FALSE	FALSE
chr14	36655979	36656097	PAX9	-1529	0	1	0	FALSE	FALSE	FALSE	FALSE	TRUE	FALSE	FALSE	FALSE	FALSE	FALSE	FALSE	FALSE
chr14	36661793	36662193	PAX9	0	0	0	1	TRUE	FALSE	TRUE	FALSE	FALSE	FALSE	TRUE	FALSE	FALSE	FALSE	FALSE	FALSE
chr14	36663152	36663270	LOC105370455	-1521	0	1	0	TRUE	FALSE	FALSE	FALSE	FALSE	FALSE	TRUE	FALSE	FALSE	FALSE	FALSE	FALSE
chr14	36666271	36666389	LOC105370455	-4640	0	1	0	TRUE	FALSE	FALSE	FALSE	FALSE	FALSE	FALSE	FALSE	FALSE	FALSE	FALSE	FALSE
chr14	37172025	37172660	SLC25A21	17	1	0	0	FALSE	FALSE	FALSE	FALSE	TRUE	FALSE	FALSE	FALSE	FALSE	FALSE	FALSE	FALSE
chr14	37197854	37198254	MIPOL1	0	0	0	1	FALSE	FALSE	FALSE	FALSE	TRUE	FALSE	FALSE	FALSE	FALSE	FALSE	FALSE	FALSE
chr14	37233027	37233145	MIPOL1	35039	0	1	0	TRUE	FALSE	FALSE	FALSE	FALSE	FALSE	FALSE	FALSE	FALSE	FALSE	FALSE	FALSE
chr14	37583229	37585444	FOXA1	10521	0	1	0	FALSE	FALSE	FALSE	FALSE	FALSE	TRUE	FALSE	FALSE	FALSE	FALSE	FALSE	TRUE
chr14	37587785	37589127	FOXA1	6401	1	0	0	TRUE	FALSE	FALSE	FALSE	FALSE	FALSE	FALSE	FALSE	FALSE	FALSE	FALSE	FALSE
chr14	37594296	37594414	FOXA1	502	0	1	0	FALSE	FALSE	FALSE	FALSE	FALSE	TRUE	FALSE	FALSE	FALSE	FALSE	FALSE	FALSE
chr14	37594952	37595352	FOXA1	0	0	0	1	FALSE	FALSE	FALSE	TRUE	TRUE	TRUE	FALSE	FALSE	FALSE	TRUE	TRUE	TRUE
chr14	37595515	37595915	TTC6	0	0	0	1	FALSE	FALSE	FALSE	TRUE	TRUE	TRUE	FALSE	FALSE	FALSE	TRUE	TRUE	TRUE
chr14	38209175	38209293	SSTR1	1236	0	1	0	TRUE	FALSE	FALSE	FALSE	FALSE	FALSE	FALSE	FALSE	FALSE	FALSE	FALSE	FALSE
chr14	38255474	38255592	CLEC14A	837	0	1	0	TRUE	FALSE	FALSE	FALSE	FALSE	FALSE	TRUE	FALSE	FALSE	FALSE	FALSE	FALSE
chr14	38255711	38255829	CLEC14A	600	0	1	0	TRUE	FALSE	FALSE	FALSE	FALSE	FALSE	TRUE	FALSE	FALSE	FALSE	FALSE	FALSE
chr14	38256054	38256172	CLEC14A	257	0	1	0	TRUE	FALSE	FALSE	FALSE	FALSE	FALSE	TRUE	FALSE	FALSE	FALSE	FALSE	FALSE
chr14	39102276	39103528	LOC105370458	-237	0	1	0	TRUE	FALSE	FALSE	TRUE	TRUE	FALSE	FALSE	FALSE	FALSE	FALSE	FALSE	FALSE
chr14	39114213	39114613	GEMIN2	0	0	0	1	FALSE	FALSE	FALSE	TRUE	TRUE	TRUE	FALSE	FALSE	FALSE	FALSE	FALSE	FALSE
chr14	39114283	39115096	LOC105370459	-13	1	0	0	FALSE	FALSE	FALSE	TRUE	FALSE	FALSE	FALSE	FALSE	FALSE	TRUE	FALSE	FALSE
chr14	39431866	39432266	FBXO33	0	0	0	1	TRUE	FALSE	FALSE	FALSE	FALSE	FALSE	FALSE	FALSE	FALSE	FALSE	FALSE	FALSE
chr14	39432440	39432558	FBXO33	1	0	1	0	FALSE	FALSE	FALSE	FALSE	TRUE	TRUE	FALSE	FALSE	FALSE	FALSE	FALSE	FALSE
chr14	45253222	45253340	MIS18BP1	60	0	1	0	FALSE	FALSE	FALSE	TRUE	TRUE	FALSE	FALSE	FALSE	FALSE	FALSE	FALSE	FALSE
chr14	49598838	49599238	LRR1	0	0	0	1	FALSE	FALSE	FALSE	TRUE	TRUE	TRUE	FALSE	FALSE	FALSE	FALSE	FALSE	FALSE
chr14	49598901	49599019	LOC100288910	198	0	1	0	TRUE	FALSE	FALSE	TRUE	TRUE	FALSE	FALSE	FALSE	FALSE	TRUE	FALSE	FALSE
chr14	49851874	49853073	NEMF	349	1	0	0	FALSE	FALSE	FALSE	TRUE	FALSE	TRUE	FALSE	FALSE	FALSE	FALSE	FALSE	FALSE
chr14	50006125	50006519	LINC01588	197	1	0	0	TRUE	FALSE	FALSE	FALSE	FALSE	FALSE	FALSE	FALSE	FALSE	FALSE	FALSE	FALSE
chr14	50116570	50116688	VCPKMT	-50	0	1	0	TRUE	FALSE	FALSE	FALSE	FALSE	FALSE	FALSE	FALSE	FALSE	FALSE	FALSE	FALSE
chr14	50311925	50312325	L2HGDH	0	0	0	1	FALSE	FALSE	FALSE	TRUE	FALSE	FALSE	FALSE	FALSE	FALSE	FALSE	FALSE	FALSE
chr14	50312229	50312629	ATP5S	0	0	0	1	FALSE	FALSE	FALSE	TRUE	FALSE	FALSE	FALSE	FALSE	FALSE	FALSE	FALSE	FALSE
chr14	50531391	50532081	MAP4K5	831	1	0	0	FALSE	FALSE	FALSE	TRUE	FALSE	FALSE	FALSE	FALSE	FALSE	FALSE	FALSE	FALSE
chr14	50773722	50773840	LOC105370489	-48015	0	1	0	FALSE	FALSE	FALSE	FALSE	TRUE	FALSE	FALSE	FALSE	FALSE	FALSE	FALSE	FALSE
chr14	50774373	50774491	LOC105370489	-47364	0	1	0	TRUE	FALSE	FALSE	FALSE	FALSE	FALSE	FALSE	FALSE	FALSE	FALSE	FALSE	FALSE
chr14	50944183	50944583	PYGL	0	0	0	1	FALSE	FALSE	FALSE	FALSE	TRUE	FALSE	FALSE	FALSE	FALSE	FALSE	FALSE	FALSE
chr14	51093320	51095704	TRIM9	1192	1	0	0	TRUE	FALSE	FALSE	FALSE	FALSE	FALSE	FALSE	FALSE	FALSE	FALSE	FALSE	FALSE
chr14	51094801	51095201	TRIM9	0	0	0	1	FALSE	FALSE	FALSE	TRUE	FALSE	FALSE	FALSE	FALSE	FALSE	FALSE	FALSE	FALSE
chr14	51989489	51989607	C14orf166	39	0	1	0	FALSE	FALSE	FALSE	TRUE	TRUE	FALSE	FALSE	FALSE	FALSE	FALSE	FALSE	FALSE
chr14	52014206	52014324	C14orf166	24756	0	1	0	FALSE	FALSE	TRUE	FALSE	FALSE	FALSE	FALSE	FALSE	FALSE	FALSE	FALSE	FALSE
chr14	52272525	52272643	PTGDR	4872	0	1	0	TRUE	FALSE	FALSE	FALSE	FALSE	FALSE	FALSE	FALSE	FALSE	FALSE	FALSE	FALSE
chr14	52694523	52695931	ERO1A	523	1	0	0	TRUE	FALSE	FALSE	FALSE	FALSE	FALSE	TRUE	FALSE	FALSE	FALSE	FALSE	FALSE
chr14	53306324	53306442	LOC105370504	-43787	0	1	0	TRUE	FALSE	FALSE	FALSE	FALSE	FALSE	FALSE	FALSE	FALSE	FALSE	FALSE	FALSE
chr14	53399151	53399269	LOC105370504	33908	0	1	0	TRUE	FALSE	FALSE	FALSE	FALSE	FALSE	FALSE	FALSE	FALSE	FALSE	FALSE	FALSE
chr14	53946041	53947552	MIR5580	1688	1	0	0	TRUE	FALSE	FALSE	FALSE	FALSE	FALSE	FALSE	FALSE	FALSE	FALSE	FALSE	FALSE
chr14	54441442	54441560	CNIH1	-71	0	1	0	FALSE	FALSE	FALSE	TRUE	FALSE	FALSE	FALSE	FALSE	FALSE	FALSE	FALSE	FALSE
chr14	54503632	54503750	CGRRF1	-6177	0	1	0	TRUE	FALSE	FALSE	FALSE	FALSE	FALSE	FALSE	FALSE	FALSE	FALSE	FALSE	FALSE
chr14	54902524	54902924	GCH1	0	0	0	1	FALSE	TRUE	FALSE	FALSE	FALSE	FALSE	FALSE	FALSE	FALSE	FALSE	FALSE	FALSE
chr14	54902903	54903021	GCH1	-138	0	1	0	TRUE	FALSE	FALSE	FALSE	FALSE	FALSE	FALSE	FALSE	FALSE	FALSE	FALSE	FALSE
chr14	55026775	55027175	WDHD1	0	0	0	1	FALSE	FALSE	FALSE	TRUE	TRUE	TRUE	FALSE	FALSE	FALSE	TRUE	TRUE	TRUE
chr14	55027096	55027214	SOCS4	25	0	1	0	FALSE	FALSE	FALSE	TRUE	TRUE	TRUE	FALSE	FALSE	FALSE	TRUE	TRUE	TRUE
chr14	55027148	55027548	SOCS4	0	0	0	1	FALSE	FALSE	FALSE	TRUE	TRUE	TRUE	FALSE	FALSE	FALSE	TRUE	TRUE	TRUE
chr14	55051643	55052920	MAPK1IP1L	638	1	0	0	TRUE	FALSE	FALSE	FALSE	FALSE	TRUE	FALSE	FALSE	FALSE	FALSE	FALSE	FALSE
chr14	56579792	56580636	TMEM260	389	1	0	0	TRUE	FALSE	FALSE	FALSE	FALSE	FALSE	FALSE	FALSE	FALSE	FALSE	FALSE	FALSE
chr14	58199869	58199987	ACTR10	-186	0	1	0	FALSE	FALSE	FALSE	TRUE	TRUE	TRUE	FALSE	FALSE	FALSE	TRUE	TRUE	TRUE
chr14	58200114	58201146	ACTR10	461	1	0	0	FALSE	FALSE	FALSE	TRUE	TRUE	TRUE	FALSE	FALSE	FALSE	TRUE	TRUE	TRUE
chr14	58244671	58244789	PSMA3	-74	0	1	0	FALSE	FALSE	TRUE	TRUE	TRUE	TRUE	FALSE	FALSE	FALSE	FALSE	FALSE	FALSE
chr14	58244765	58245165	PSMA3	0	0	0	1	FALSE	FALSE	FALSE	TRUE	TRUE	TRUE	FALSE	FALSE	FALSE	FALSE	FALSE	FALSE
chr14	59123770	59123888	LOC107984642	-34314	0	1	0	TRUE	FALSE	FALSE	FALSE	FALSE	FALSE	FALSE	FALSE	FALSE	FALSE	FALSE	FALSE
chr14	59463987	59465341	GPR135	677	0	1	0	TRUE	FALSE	FALSE	TRUE	FALSE	FALSE	FALSE	FALSE	FALSE	FALSE	FALSE	FALSE
chr14	59870220	59870839	RTN1	310	1	0	0	TRUE	FALSE	FALSE	FALSE	FALSE	TRUE	FALSE	FALSE	FALSE	FALSE	FALSE	FALSE
chr14	60249247	60250724	PPM1A	-118	1	0	0	FALSE	FALSE	FALSE	FALSE	TRUE	FALSE	FALSE	FALSE	FALSE	FALSE	FALSE	FALSE
chr14	60508632	60508750	SIX6	-528	0	1	0	TRUE	FALSE	FALSE	FALSE	FALSE	FALSE	FALSE	FALSE	FALSE	FALSE	FALSE	FALSE
chr14	60648076	60649437	SIX1	681	1	0	0	TRUE	FALSE	FALSE	TRUE	FALSE	FALSE	FALSE	FALSE	FALSE	FALSE	FALSE	FALSE
chr14	60649177	60649577	SIX1	0	0	0	1	TRUE	FALSE	FALSE	FALSE	FALSE	FALSE	FALSE	FALSE	FALSE	FALSE	FALSE	FALSE
chr14	60981137	60981537	SLC38A6	0	0	0	1	FALSE	FALSE	FALSE	TRUE	TRUE	TRUE	FALSE	FALSE	FALSE	TRUE	FALSE	FALSE
chr14	61280642	61280760	PRKCH	-251	0	1	0	TRUE	FALSE	TRUE	FALSE	FALSE	FALSE	FALSE	FALSE	FALSE	FALSE	FALSE	FALSE
chr14	61381122	61381240	PRKCH	-5169	0	1	0	FALSE	FALSE	FALSE	TRUE	FALSE	FALSE	FALSE	FALSE	FALSE	FALSE	FALSE	FALSE
chr14	61381698	61381816	PRKCH	-4593	0	1	0	FALSE	FALSE	FALSE	TRUE	FALSE	FALSE	FALSE	FALSE	FALSE	FALSE	FALSE	FALSE
chr14	64112854	64113745	MIR548H1	-18174	1	0	0	TRUE	FALSE	FALSE	FALSE	FALSE	FALSE	FALSE	FALSE	FALSE	FALSE	FALSE	FALSE
chr14	64388040	64389388	MTHFD1	674	1	0	0	FALSE	FALSE	FALSE	TRUE	TRUE	TRUE	FALSE	FALSE	FALSE	TRUE	FALSE	FALSE
chr14	64502879	64503218	ZBTB25	-35	1	0	0	TRUE	FALSE	FALSE	FALSE	FALSE	FALSE	FALSE	FALSE	FALSE	FALSE	FALSE	FALSE
chr14	64503279	64503573	ZBTB25	204	1	0	0	TRUE	FALSE	FALSE	FALSE	FALSE	FALSE	FALSE	FALSE	FALSE	FALSE	FALSE	FALSE
chr14	64504284	64504684	ZBTB25	0	0	0	1	FALSE	FALSE	FALSE	FALSE	TRUE	TRUE	FALSE	FALSE	FALSE	FALSE	FALSE	FALSE
chr14	64504683	64505083	ZBTB1	0	0	0	1	FALSE	FALSE	FALSE	FALSE	TRUE	TRUE	FALSE	FALSE	FALSE	FALSE	FALSE	FALSE
chr14	64504845	64505213	ZBTB1	177	1	0	0	TRUE	FALSE	FALSE	FALSE	FALSE	FALSE	FALSE	FALSE	FALSE	FALSE	FALSE	FALSE
chr14	64540641	64541041	HSPA2	0	0	0	1	TRUE	FALSE	FALSE	FALSE	FALSE	FALSE	FALSE	FALSE	FALSE	FALSE	FALSE	FALSE
chr14	64945579	64945697	GPX2	-2733	0	1	0	FALSE	FALSE	FALSE	TRUE	FALSE	FALSE	FALSE	FALSE	FALSE	FALSE	FALSE	FALSE
chr14	64960810	64960928	RAB15	11288	0	1	0	TRUE	FALSE	FALSE	FALSE	FALSE	FALSE	FALSE	FALSE	FALSE	FALSE	FALSE	FALSE
chr14	64968799	64968917	RAB15	3299	0	1	0	TRUE	FALSE	FALSE	FALSE	FALSE	FALSE	FALSE	FALSE	FALSE	FALSE	FALSE	FALSE
chr14	64986718	64986836	FNTB	-11	0	1	0	FALSE	FALSE	FALSE	TRUE	TRUE	TRUE	FALSE	FALSE	FALSE	TRUE	TRUE	TRUE
chr14	64986790	64987190	FNTB	0	0	0	1	FALSE	FALSE	FALSE	TRUE	TRUE	TRUE	FALSE	FALSE	FALSE	FALSE	FALSE	FALSE
chr14	66391984	66392102	LINC00238	-94327	0	1	0	FALSE	FALSE	FALSE	TRUE	FALSE	FALSE	FALSE	FALSE	FALSE	FALSE	FALSE	FALSE
chr14	66395466	66395584	LINC00238	-90845	0	1	0	TRUE	FALSE	FALSE	FALSE	FALSE	FALSE	FALSE	FALSE	FALSE	FALSE	FALSE	FALSE
chr14	66401585	66401703	LINC00238	-84726	0	1	0	FALSE	FALSE	TRUE	FALSE	FALSE	FALSE	FALSE	FALSE	FALSE	FALSE	FALSE	FALSE
chr14	67359491	67359891	ATP6V1D	0	0	0	1	FALSE	FALSE	FALSE	TRUE	TRUE	TRUE	FALSE	FALSE	FALSE	FALSE	FALSE	FALSE
chr14	67514874	67515274	TMEM229B	0	0	0	1	FALSE	FALSE	FALSE	FALSE	TRUE	FALSE	FALSE	FALSE	FALSE	FALSE	FALSE	FALSE
chr14	67673928	67674885	VTI1B	479	1	0	0	TRUE	FALSE	FALSE	FALSE	FALSE	FALSE	FALSE	FALSE	FALSE	FALSE	FALSE	FALSE
chr14	67819679	67820079	RAD51B	0	0	0	1	FALSE	FALSE	FALSE	TRUE	TRUE	FALSE	FALSE	FALSE	FALSE	FALSE	FALSE	FALSE
chr14	68748305	68748423	LOC107984647	1368	0	1	0	TRUE	FALSE	FALSE	FALSE	FALSE	FALSE	FALSE	FALSE	FALSE	FALSE	FALSE	FALSE
chr14	68787484	68787602	ZFP36L1	6371	0	1	0	FALSE	FALSE	FALSE	FALSE	TRUE	FALSE	FALSE	FALSE	FALSE	FALSE	FALSE	FALSE
chr14	68792764	68793164	ZFP36L1	0	0	0	1	TRUE	FALSE	FALSE	FALSE	FALSE	FALSE	FALSE	FALSE	FALSE	FALSE	FALSE	FALSE
chr14	68823511	68824285	ZFP36L1	-27655	1	0	0	FALSE	FALSE	FALSE	TRUE	FALSE	FALSE	FALSE	FALSE	FALSE	FALSE	FALSE	FALSE
chr14	68824367	68825152	ZFP36L1	-28516	0	1	0	FALSE	FALSE	FALSE	TRUE	FALSE	FALSE	FALSE	FALSE	FALSE	FALSE	FALSE	FALSE
chr14	68871747	68871865	ACTN1	65372	0	1	0	FALSE	FALSE	TRUE	TRUE	TRUE	FALSE	FALSE	FALSE	FALSE	TRUE	TRUE	FALSE
chr14	69152834	69153234	DCAF5	0	0	0	1	FALSE	FALSE	FALSE	FALSE	FALSE	TRUE	FALSE	FALSE	FALSE	FALSE	FALSE	FALSE
chr14	69191415	69191815	EXD2	0	0	0	1	TRUE	FALSE	FALSE	FALSE	FALSE	FALSE	FALSE	FALSE	FALSE	FALSE	FALSE	FALSE
chr14	69531535	69531653	PLEKHD1	11905	0	1	0	TRUE	FALSE	FALSE	FALSE	FALSE	FALSE	FALSE	FALSE	FALSE	FALSE	FALSE	FALSE
chr14	69727077	69727195	SRSF5	-39950	0	1	0	FALSE	FALSE	FALSE	TRUE	FALSE	FALSE	FALSE	FALSE	FALSE	FALSE	FALSE	FALSE
chr14	69767111	69767713	SRSF5	271	1	0	0	FALSE	FALSE	FALSE	TRUE	FALSE	TRUE	FALSE	FALSE	FALSE	FALSE	FALSE	FALSE
chr14	70809772	70809890	LOC100506411	139	0	1	0	FALSE	FALSE	FALSE	TRUE	FALSE	FALSE	FALSE	FALSE	FALSE	TRUE	FALSE	FALSE
chr14	70907404	70909145	PCNX1	832	1	0	0	FALSE	FALSE	FALSE	TRUE	TRUE	FALSE	FALSE	FALSE	FALSE	FALSE	TRUE	FALSE
chr14	71319715	71321638	SIPA1L1	171	1	0	0	FALSE	FALSE	FALSE	TRUE	TRUE	TRUE	FALSE	FALSE	FALSE	TRUE	TRUE	FALSE
chr14	71321656	71322393	LOC102724015	-157	1	0	0	FALSE	FALSE	FALSE	TRUE	TRUE	FALSE	FALSE	FALSE	FALSE	TRUE	TRUE	FALSE
chr14	71355419	71355707	SIPA1L1	33200	1	0	0	TRUE	FALSE	FALSE	FALSE	FALSE	FALSE	FALSE	FALSE	FALSE	FALSE	FALSE	FALSE
chr14	72943079	72943197	DCAF4	5189	0	1	0	TRUE	FALSE	FALSE	FALSE	FALSE	FALSE	FALSE	FALSE	FALSE	FALSE	FALSE	FALSE
chr14	73058255	73058373	RBM25	-121	0	1	0	TRUE	FALSE	FALSE	FALSE	FALSE	FALSE	FALSE	FALSE	FALSE	FALSE	FALSE	FALSE
chr14	73058436	73058836	RBM25	0	0	0	1	FALSE	FALSE	FALSE	TRUE	TRUE	TRUE	FALSE	FALSE	FALSE	FALSE	FALSE	FALSE
chr14	73237496	73238688	PAPLN	578	1	0	0	FALSE	FALSE	FALSE	TRUE	TRUE	FALSE	FALSE	FALSE	FALSE	FALSE	FALSE	FALSE
chr14	73269627	73270693	LOC101928123	-24159	1	0	0	FALSE	TRUE	FALSE	FALSE	FALSE	FALSE	FALSE	FALSE	FALSE	FALSE	FALSE	FALSE
chr14	73457321	73458029	NUMB	905	1	0	0	TRUE	FALSE	FALSE	FALSE	FALSE	FALSE	FALSE	FALSE	FALSE	FALSE	FALSE	FALSE
chr14	73458030	73458580	NUMB	275	1	0	0	TRUE	FALSE	FALSE	FALSE	FALSE	FALSE	FALSE	FALSE	FALSE	FALSE	FALSE	FALSE
chr14	74302676	74303076	ABCD4	0	0	0	1	FALSE	FALSE	FALSE	TRUE	FALSE	FALSE	FALSE	FALSE	FALSE	FALSE	FALSE	FALSE
chr14	74302714	74302832	ABCD4	156	0	1	0	TRUE	FALSE	FALSE	FALSE	FALSE	TRUE	FALSE	FALSE	FALSE	FALSE	FALSE	FALSE
chr14	74763262	74763662	YLPM1	0	0	0	1	FALSE	FALSE	FALSE	TRUE	TRUE	FALSE	FALSE	FALSE	FALSE	TRUE	TRUE	FALSE
chr14	74881762	74881880	DLST	-69	0	1	0	TRUE	FALSE	FALSE	FALSE	FALSE	FALSE	FALSE	FALSE	FALSE	FALSE	FALSE	FALSE
chr14	74881825	74882225	DLST	0	0	0	1	FALSE	FALSE	FALSE	TRUE	TRUE	FALSE	FALSE	FALSE	FALSE	FALSE	FALSE	FALSE
chr14	74942575	74942693	LOC107984689	-1651	0	1	0	FALSE	FALSE	FALSE	FALSE	FALSE	TRUE	FALSE	FALSE	FALSE	FALSE	FALSE	FALSE
chr14	75125885	75127075	NEK9	575	0	1	0	TRUE	FALSE	FALSE	FALSE	FALSE	FALSE	FALSE	FALSE	FALSE	FALSE	FALSE	FALSE
chr14	75175780	75176646	TMED10	433	1	0	0	FALSE	FALSE	FALSE	TRUE	TRUE	TRUE	FALSE	FALSE	FALSE	TRUE	TRUE	TRUE
chr14	75450306	75450932	JDP2	17282	1	0	0	TRUE	FALSE	FALSE	FALSE	FALSE	FALSE	FALSE	FALSE	FALSE	FALSE	FALSE	FALSE
chr14	75469613	75470173	JDP2	36556	1	0	0	FALSE	FALSE	TRUE	FALSE	FALSE	FALSE	FALSE	FALSE	FALSE	FALSE	FALSE	FALSE
chr14	75572175	75572293	LOC107984652	-2662	0	1	0	TRUE	FALSE	FALSE	FALSE	FALSE	FALSE	FALSE	FALSE	FALSE	FALSE	FALSE	FALSE
chr14	75578596	75579531	FLVCR2	467	1	0	0	TRUE	FALSE	FALSE	FALSE	FALSE	FALSE	FALSE	FALSE	FALSE	FALSE	FALSE	FALSE
chr14	75661092	75661210	C14orf1	44	0	1	0	FALSE	TRUE	FALSE	FALSE	FALSE	FALSE	FALSE	FALSE	FALSE	FALSE	FALSE	FALSE
chr14	75971251	75971369	TGFB3	10712	0	1	0	TRUE	FALSE	FALSE	FALSE	FALSE	FALSE	FALSE	FALSE	FALSE	FALSE	FALSE	FALSE
chr14	75993596	75993714	IFT43	7903	0	1	0	TRUE	FALSE	FALSE	FALSE	FALSE	FALSE	FALSE	FALSE	FALSE	FALSE	FALSE	FALSE
chr14	76012559	76012677	IFT43	26866	0	1	0	TRUE	FALSE	FALSE	FALSE	FALSE	FALSE	FALSE	FALSE	FALSE	FALSE	FALSE	FALSE
chr14	76387292	76387410	ESRRB	-9617	0	1	0	TRUE	FALSE	FALSE	FALSE	FALSE	FALSE	FALSE	FALSE	FALSE	FALSE	FALSE	FALSE
chr14	76397244	76397362	ESRRB	334	0	1	0	TRUE	FALSE	FALSE	FALSE	FALSE	FALSE	FALSE	FALSE	FALSE	FALSE	FALSE	FALSE
chr14	76876134	76876252	LRRC74A	38305	0	1	0	TRUE	FALSE	FALSE	FALSE	FALSE	FALSE	FALSE	FALSE	FALSE	FALSE	FALSE	FALSE
chr14	76913226	76914255	LINC01629	-45897	1	0	0	TRUE	FALSE	FALSE	FALSE	FALSE	FALSE	FALSE	FALSE	FALSE	FALSE	FALSE	FALSE
chr14	76946745	76948050	LINC01629	-12240	1	0	0	TRUE	FALSE	FALSE	TRUE	FALSE	FALSE	FALSE	FALSE	FALSE	FALSE	FALSE	FALSE
chr14	76948281	76948592	LINC01629	-11201	1	0	0	FALSE	FALSE	FALSE	TRUE	FALSE	FALSE	FALSE	FALSE	FALSE	FALSE	FALSE	FALSE
chr14	77024087	77024674	LOC107984638	-3410	1	0	0	TRUE	FALSE	FALSE	FALSE	FALSE	FALSE	FALSE	FALSE	FALSE	FALSE	FALSE	FALSE
chr14	77025992	77028699	LOC107984638	-445	1	0	0	FALSE	FALSE	FALSE	TRUE	TRUE	FALSE	FALSE	FALSE	FALSE	TRUE	TRUE	FALSE
chr14	77032660	77034637	LOC105370579	2004	1	0	0	FALSE	FALSE	FALSE	TRUE	TRUE	FALSE	FALSE	FALSE	FALSE	TRUE	FALSE	FALSE
chr14	77098234	77099546	CIPC	656	1	0	0	FALSE	TRUE	FALSE	FALSE	FALSE	FALSE	FALSE	FALSE	FALSE	FALSE	FALSE	FALSE
chr14	77139740	77139858	ZDHHC22	1162	0	1	0	TRUE	FALSE	FALSE	FALSE	FALSE	FALSE	FALSE	FALSE	FALSE	FALSE	FALSE	FALSE
chr14	77615210	77616767	SPTLC2	675	1	0	0	TRUE	FALSE	FALSE	TRUE	TRUE	TRUE	FALSE	FALSE	FALSE	TRUE	TRUE	TRUE
chr14	77760533	77760651	C14orf178	-237	0	1	0	FALSE	FALSE	FALSE	TRUE	TRUE	TRUE	FALSE	FALSE	FALSE	TRUE	TRUE	TRUE
chr14	77760829	77761154	C14orf178	162	1	0	0	FALSE	FALSE	FALSE	TRUE	TRUE	TRUE	FALSE	FALSE	FALSE	TRUE	TRUE	TRUE
chr14	77817484	77817602	ADCK1	17408	0	1	0	TRUE	FALSE	FALSE	FALSE	FALSE	FALSE	FALSE	FALSE	FALSE	FALSE	FALSE	FALSE
chr14	78934072	78934190	LOC107984629	-39011	0	1	0	TRUE	FALSE	FALSE	FALSE	FALSE	FALSE	FALSE	FALSE	FALSE	FALSE	FALSE	FALSE
chr14	81533540	81533940	SEL1L	0	0	0	1	FALSE	FALSE	FALSE	TRUE	FALSE	TRUE	FALSE	FALSE	FALSE	FALSE	FALSE	FALSE
chr14	81533764	81533882	SEL1L	-16	0	1	0	FALSE	FALSE	FALSE	TRUE	FALSE	TRUE	FALSE	FALSE	FALSE	TRUE	FALSE	FALSE
chr14	88385826	88385944	SPATA7	-35	0	1	0	FALSE	FALSE	FALSE	TRUE	FALSE	FALSE	FALSE	FALSE	FALSE	FALSE	FALSE	FALSE
chr14	88555032	88555150	PTPN21	-312	0	1	0	TRUE	FALSE	FALSE	FALSE	FALSE	FALSE	FALSE	FALSE	FALSE	FALSE	FALSE	FALSE
chr14	88562951	88563351	ZC3H14	0	0	0	1	FALSE	FALSE	FALSE	TRUE	TRUE	TRUE	FALSE	FALSE	FALSE	TRUE	FALSE	FALSE
chr14	89416904	89417304	FOXN3	0	0	0	1	TRUE	FALSE	FALSE	FALSE	FALSE	FALSE	FALSE	FALSE	FALSE	FALSE	FALSE	FALSE
chr14	90235271	90235588	PSMC1	-21120	0	1	0	TRUE	FALSE	FALSE	FALSE	FALSE	FALSE	FALSE	FALSE	FALSE	FALSE	FALSE	FALSE
chr14	90277104	90277222	PSMC1	19220	0	1	0	FALSE	FALSE	TRUE	FALSE	FALSE	FALSE	FALSE	FALSE	FALSE	FALSE	FALSE	FALSE
chr14	90294381	90294499	PSMC1	36497	0	1	0	FALSE	FALSE	FALSE	FALSE	TRUE	FALSE	FALSE	FALSE	FALSE	FALSE	FALSE	FALSE
chr14	90508796	90509250	LOC105370619	8186	1	0	0	TRUE	FALSE	FALSE	FALSE	FALSE	FALSE	FALSE	FALSE	FALSE	FALSE	FALSE	FALSE
chr14	90509481	90509742	LOC105370619	7598	1	0	0	TRUE	FALSE	FALSE	FALSE	FALSE	FALSE	FALSE	FALSE	FALSE	FALSE	FALSE	FALSE
chr14	90510093	90510675	LOC105370619	6825	1	0	0	TRUE	FALSE	FALSE	FALSE	FALSE	FALSE	FALSE	FALSE	FALSE	FALSE	FALSE	FALSE
chr14	90511902	90512982	LOC105370619	4767	1	0	0	TRUE	TRUE	TRUE	FALSE	FALSE	FALSE	FALSE	FALSE	FALSE	FALSE	FALSE	FALSE
chr14	90513231	90514387	LOC105370619	3400	1	0	0	TRUE	TRUE	FALSE	FALSE	FALSE	FALSE	TRUE	FALSE	FALSE	FALSE	FALSE	FALSE
chr14	90567979	90568216	LOC105370620	-30930	1	0	0	TRUE	FALSE	FALSE	FALSE	FALSE	FALSE	FALSE	FALSE	FALSE	FALSE	FALSE	FALSE
chr14	90679010	90679128	LOC105370622	-18263	0	1	0	TRUE	FALSE	FALSE	FALSE	FALSE	FALSE	FALSE	FALSE	FALSE	FALSE	FALSE	FALSE
chr14	90758441	90759478	TTC7B	-14037	0	1	0	TRUE	FALSE	FALSE	FALSE	FALSE	FALSE	FALSE	FALSE	FALSE	FALSE	FALSE	FALSE
chr14	90760845	90760963	TTC7B	-15982	0	1	0	TRUE	FALSE	FALSE	FALSE	FALSE	FALSE	FALSE	FALSE	FALSE	FALSE	FALSE	FALSE
chr14	90796043	90796161	TTC7B	20112	0	1	0	FALSE	FALSE	TRUE	FALSE	FALSE	FALSE	FALSE	FALSE	FALSE	FALSE	FALSE	FALSE
chr14	91157897	91158015	SNORA11B	31531	0	1	0	TRUE	FALSE	FALSE	FALSE	FALSE	FALSE	TRUE	FALSE	FALSE	FALSE	FALSE	FALSE
chr14	91167295	91167413	SNORA11B	40929	0	1	0	TRUE	FALSE	FALSE	FALSE	FALSE	FALSE	FALSE	FALSE	FALSE	FALSE	FALSE	FALSE
chr14	91313216	91313334	CCDC88C	-115	0	1	0	TRUE	FALSE	FALSE	FALSE	FALSE	FALSE	FALSE	FALSE	FALSE	FALSE	FALSE	FALSE
chr14	91396972	91397971	LOC105370624	973	1	0	0	FALSE	FALSE	FALSE	TRUE	TRUE	FALSE	FALSE	FALSE	FALSE	FALSE	FALSE	FALSE
chr14	91417548	91417948	CCDC88C	0	0	0	1	FALSE	FALSE	FALSE	TRUE	FALSE	FALSE	FALSE	FALSE	FALSE	FALSE	FALSE	FALSE
chr14	92106750	92106868	ATXN3	-188	0	1	0	FALSE	FALSE	TRUE	FALSE	FALSE	FALSE	FALSE	FALSE	FALSE	FALSE	FALSE	FALSE
chr14	92783957	92784075	GOLGA5	-10214	0	1	0	FALSE	FALSE	TRUE	FALSE	FALSE	FALSE	FALSE	FALSE	FALSE	FALSE	FALSE	FALSE
chr14	92785682	92785800	GOLGA5	-8489	0	1	0	TRUE	FALSE	FALSE	FALSE	FALSE	FALSE	FALSE	FALSE	FALSE	FALSE	FALSE	FALSE
chr14	92794230	92794982	GOLGA5	376	0	1	0	TRUE	FALSE	FALSE	FALSE	FALSE	FALSE	FALSE	FALSE	FALSE	FALSE	FALSE	FALSE
chr14	92936146	92936264	CHGA	13106	0	1	0	TRUE	FALSE	FALSE	FALSE	FALSE	FALSE	FALSE	FALSE	FALSE	FALSE	FALSE	FALSE
chr14	93112811	93113821	ITPK1	1892	1	0	0	TRUE	FALSE	FALSE	FALSE	FALSE	TRUE	FALSE	FALSE	FALSE	FALSE	FALSE	FALSE
chr14	93114021	93114282	ITPK1	1057	1	0	0	TRUE	FALSE	FALSE	FALSE	FALSE	FALSE	FALSE	FALSE	FALSE	FALSE	FALSE	FALSE
chr14	93114364	93114645	ITPK1	704	1	0	0	TRUE	FALSE	FALSE	FALSE	FALSE	FALSE	FALSE	FALSE	FALSE	FALSE	FALSE	FALSE
chr14	93114981	93115381	ITPK1	0	0	0	1	TRUE	FALSE	FALSE	FALSE	FALSE	FALSE	FALSE	FALSE	FALSE	FALSE	FALSE	FALSE
chr14	93206754	93207154	C14orf142	0	0	0	1	FALSE	FALSE	FALSE	TRUE	FALSE	FALSE	FALSE	FALSE	FALSE	TRUE	FALSE	FALSE
chr14	93207159	93207559	UBR7	0	0	0	1	FALSE	FALSE	FALSE	TRUE	FALSE	FALSE	FALSE	FALSE	FALSE	TRUE	FALSE	FALSE
chr14	94671100	94671218	SERPINA13P	30435	0	1	0	FALSE	FALSE	FALSE	TRUE	FALSE	FALSE	FALSE	FALSE	FALSE	FALSE	FALSE	FALSE
chr14	94671888	94672006	SERPINA13P	31223	0	1	0	TRUE	FALSE	FALSE	FALSE	FALSE	FALSE	FALSE	FALSE	FALSE	FALSE	FALSE	FALSE
chr14	95417938	95418056	LINC00341	-7907	0	1	0	TRUE	FALSE	FALSE	FALSE	FALSE	FALSE	FALSE	FALSE	FALSE	FALSE	FALSE	FALSE
chr14	95444818	95444936	LOC105370641	21047	0	1	0	FALSE	FALSE	FALSE	TRUE	FALSE	FALSE	FALSE	FALSE	FALSE	FALSE	FALSE	FALSE
chr14	95456443	95456561	LOC105370641	9422	0	1	0	FALSE	FALSE	FALSE	FALSE	TRUE	FALSE	FALSE	FALSE	FALSE	FALSE	FALSE	FALSE
chr14	95516200	95516318	SYNE3	434	0	1	0	TRUE	FALSE	FALSE	FALSE	FALSE	FALSE	FALSE	FALSE	FALSE	FALSE	FALSE	FALSE
chr14	95534941	95535059	GLRX5	15	0	1	0	FALSE	FALSE	FALSE	TRUE	FALSE	FALSE	FALSE	FALSE	FALSE	FALSE	FALSE	FALSE
chr14	96039256	96039656	C14orf132	0	0	0	1	TRUE	FALSE	FALSE	FALSE	FALSE	FALSE	FALSE	FALSE	FALSE	FALSE	FALSE	FALSE
chr14	99441641	99441759	SETD3	33657	0	1	0	FALSE	FALSE	TRUE	FALSE	FALSE	FALSE	FALSE	FALSE	FALSE	FALSE	FALSE	FALSE
chr14	99480563	99480963	SETD3	0	0	0	1	TRUE	FALSE	FALSE	FALSE	FALSE	FALSE	FALSE	FALSE	FALSE	FALSE	FALSE	FALSE
chr14	99481439	99481557	CCNK	87	0	1	0	FALSE	TRUE	FALSE	TRUE	TRUE	FALSE	FALSE	FALSE	FALSE	FALSE	FALSE	FALSE
chr14	99522594	99522712	LOC105370661	-13443	0	1	0	TRUE	FALSE	FALSE	FALSE	FALSE	FALSE	FALSE	FALSE	FALSE	FALSE	FALSE	FALSE
chr14	99529976	99530094	LOC105370661	-6061	0	1	0	TRUE	FALSE	FALSE	FALSE	FALSE	FALSE	FALSE	FALSE	FALSE	FALSE	FALSE	FALSE
chr14	99603897	99604297	CCDC85C	0	0	0	1	FALSE	FALSE	FALSE	FALSE	TRUE	FALSE	FALSE	FALSE	FALSE	FALSE	FALSE	FALSE
chr14	99645142	99646438	HHIPL1	255	1	0	0	TRUE	FALSE	FALSE	TRUE	FALSE	FALSE	FALSE	FALSE	FALSE	FALSE	FALSE	FALSE
chr14	99730023	99731124	EML1	-7125	1	0	0	TRUE	FALSE	FALSE	FALSE	FALSE	FALSE	TRUE	FALSE	FALSE	FALSE	FALSE	FALSE
chr14	99731125	99731880	EML1	-6196	1	0	0	TRUE	FALSE	FALSE	FALSE	FALSE	FALSE	FALSE	FALSE	FALSE	FALSE	FALSE	FALSE
chr14	99793261	99793661	EML1	0	0	0	1	FALSE	FALSE	FALSE	TRUE	FALSE	FALSE	FALSE	FALSE	FALSE	FALSE	FALSE	FALSE
chr14	99937648	99937766	LOC102724682	7277	0	1	0	TRUE	FALSE	FALSE	TRUE	FALSE	FALSE	FALSE	FALSE	FALSE	FALSE	FALSE	FALSE
chr14	99938491	99938609	LOC102724682	6434	0	1	0	TRUE	FALSE	FALSE	FALSE	FALSE	FALSE	FALSE	FALSE	FALSE	FALSE	FALSE	FALSE
chr14	99971011	99973225	EVL	665	1	0	0	TRUE	FALSE	FALSE	FALSE	FALSE	FALSE	FALSE	FALSE	FALSE	FALSE	FALSE	FALSE
chr15	100340737	100341978	ADAMTS17	621	1	0	0	FALSE	FALSE	FALSE	TRUE	FALSE	FALSE	FALSE	FALSE	FALSE	FALSE	FALSE	FALSE
chr15	100602368	100602486	LINS1	13	0	1	0	FALSE	FALSE	FALSE	TRUE	FALSE	FALSE	FALSE	FALSE	FALSE	TRUE	FALSE	FALSE
chr15	100602820	100602938	ASB7	330	0	1	0	FALSE	FALSE	FALSE	TRUE	FALSE	FALSE	FALSE	FALSE	FALSE	TRUE	FALSE	FALSE
chr15	100879691	100880873	ALDH1A3	591	1	0	0	TRUE	FALSE	FALSE	FALSE	TRUE	FALSE	FALSE	FALSE	FALSE	FALSE	FALSE	FALSE
chr15	101088048	101089491	LOC105371026	5560	1	0	0	FALSE	TRUE	TRUE	FALSE	FALSE	FALSE	FALSE	FALSE	TRUE	FALSE	FALSE	FALSE
chr15	101089628	101090187	LOC105371026	4422	1	0	0	FALSE	TRUE	TRUE	FALSE	FALSE	FALSE	FALSE	FALSE	FALSE	FALSE	FALSE	FALSE
chr15	101090368	101090850	LOC105371026	3720	1	0	0	TRUE	FALSE	TRUE	FALSE	FALSE	FALSE	FALSE	FALSE	FALSE	FALSE	FALSE	FALSE
chr15	101090884	101092577	LOC105371026	2599	1	0	0	TRUE	FALSE	TRUE	FALSE	FALSE	FALSE	FALSE	FALSE	FALSE	FALSE	FALSE	FALSE
chr15	101294933	101295333	SNRPA1	0	0	0	1	FALSE	FALSE	FALSE	TRUE	FALSE	FALSE	FALSE	FALSE	FALSE	FALSE	FALSE	FALSE
chr15	101295207	101295325	SNRPA1	16	0	1	0	FALSE	FALSE	FALSE	TRUE	TRUE	TRUE	FALSE	FALSE	FALSE	FALSE	FALSE	FALSE
chr15	25136241	25136359	PWAR1	659	0	1	0	TRUE	FALSE	FALSE	FALSE	TRUE	FALSE	FALSE	FALSE	FALSE	FALSE	FALSE	FALSE
chr15	26891478	26891596	GABRA5	23709	0	1	0	FALSE	FALSE	FALSE	TRUE	TRUE	FALSE	FALSE	FALSE	FALSE	FALSE	FALSE	FALSE
chr15	29268706	29269816	NSMCE3	555	1	0	0	FALSE	FALSE	FALSE	TRUE	TRUE	FALSE	FALSE	FALSE	FALSE	TRUE	FALSE	FALSE
chr15	29614030	29614148	FAM189A1	-43366	0	1	0	TRUE	FALSE	FALSE	FALSE	FALSE	FALSE	FALSE	FALSE	FALSE	FALSE	FALSE	FALSE
chr15	31325432	31325854	KLF13	-1211	1	0	0	TRUE	FALSE	FALSE	TRUE	FALSE	FALSE	FALSE	FALSE	FALSE	FALSE	FALSE	FALSE
chr15	34038020	34039102	AVEN	541	0	1	0	FALSE	FALSE	FALSE	TRUE	TRUE	TRUE	FALSE	FALSE	FALSE	TRUE	FALSE	FALSE
chr15	34436289	34437466	GOLGA8A	589	1	0	0	FALSE	FALSE	FALSE	TRUE	FALSE	FALSE	FALSE	FALSE	FALSE	FALSE	FALSE	FALSE
chr15	34969165	34969794	AQR	315	1	0	0	FALSE	FALSE	FALSE	TRUE	TRUE	TRUE	FALSE	FALSE	FALSE	TRUE	TRUE	TRUE
chr15	34969833	34969951	AQR	-98	0	1	0	FALSE	FALSE	FALSE	TRUE	TRUE	TRUE	FALSE	FALSE	FALSE	TRUE	TRUE	TRUE
chr15	38454046	38454446	FAM98B	0	0	0	1	FALSE	FALSE	FALSE	FALSE	TRUE	FALSE	FALSE	FALSE	FALSE	FALSE	FALSE	FALSE
chr15	38454437	38454555	FAM98B	370	0	1	0	FALSE	FALSE	FALSE	TRUE	FALSE	FALSE	FALSE	FALSE	FALSE	TRUE	FALSE	FALSE
chr15	39353650	39353841	LOC105370777	67060	1	0	0	TRUE	FALSE	FALSE	FALSE	FALSE	FALSE	FALSE	FALSE	FALSE	FALSE	FALSE	FALSE
chr15	39581687	39582247	THBS1	885	1	0	0	FALSE	FALSE	FALSE	FALSE	TRUE	FALSE	FALSE	FALSE	FALSE	FALSE	FALSE	FALSE
chr15	39583557	39583675	THBS1	2534	0	1	0	TRUE	FALSE	FALSE	FALSE	FALSE	FALSE	FALSE	FALSE	FALSE	FALSE	FALSE	FALSE
[truncated: 7,027 more rows]

## Sheet: S6.2
feature_type	feature_direction	assay_1	assay_2	feature_overlap	feature_tot_assay_1	feature_overlap_fraction
guides	Expanded	LTED	MCF7_full	18	4140	0.00434783
guides	Expanded	LTED	MCF7_depleted	30	4140	0.00724638
guides	Expanded	MCF7_full	LTED	21	322	0.0652174
guides	Expanded	MCF7_full	MCF7_depleted	15	322	0.0465839
guides	Expanded	MCF7_depleted	LTED	32	854	0.0374707
guides	Expanded	MCF7_depleted	MCF7_full	15	854	0.0175644
guides	Exhausted	LTED	MCF7_full	1834	4813	0.381051
guides	Exhausted	LTED	MCF7_depleted	1067	4813	0.221691
guides	Exhausted	MCF7_full	LTED	1995	3096	0.64438
guides	Exhausted	MCF7_full	MCF7_depleted	1227	3096	0.396318
guides	Exhausted	MCF7_depleted	LTED	1159	1826	0.634721
guides	Exhausted	MCF7_depleted	MCF7_full	1227	1826	0.671961
regions_single	Expanded	LTED	MCF7_full	73	4217	0.0173109
regions_single	Expanded	LTED	MCF7_depleted	169	4217	0.0400759
regions_single	Expanded	MCF7_full	LTED	73	312	0.233974
regions_single	Expanded	MCF7_full	MCF7_depleted	34	312	0.108974
regions_single	Expanded	MCF7_depleted	LTED	169	803	0.210461
regions_single	Expanded	MCF7_depleted	MCF7_full	34	803	0.0423412
regions_single	Exhausted	LTED	MCF7_full	1590	3953	0.402226
regions_single	Exhausted	LTED	MCF7_depleted	978	3953	0.247407
regions_single	Exhausted	MCF7_full	LTED	1590	2220	0.716216
regions_single	Exhausted	MCF7_full	MCF7_depleted	953	2220	0.429279
regions_single	Exhausted	MCF7_depleted	LTED	978	1407	0.695096
regions_single	Exhausted	MCF7_depleted	MCF7_full	953	1407	0.677328
regions_multiple	Expanded	LTED	MCF7_full	2	427	0.00468384
regions_multiple	Expanded	LTED	MCF7_depleted	3	427	0.00702576
regions_multiple	Expanded	MCF7_full	LTED	2	9	0.222222
regions_multiple	Expanded	MCF7_full	MCF7_depleted	3	9	0.333333
regions_multiple	Expanded	MCF7_depleted	LTED	3	31	0.0967742
regions_multiple	Expanded	MCF7_depleted	MCF7_full	3	31	0.0967742
regions_multiple	Exhausted	LTED	MCF7_full	406	862	0.470998
regions_multiple	Exhausted	LTED	MCF7_depleted	213	862	0.2471
regions_multiple	Exhausted	MCF7_full	LTED	406	525	0.773333
regions_multiple	Exhausted	MCF7_full	MCF7_depleted	203	525	0.386667
regions_multiple	Exhausted	MCF7_depleted	LTED	213	263	0.809886
regions_multiple	Exhausted	MCF7_depleted	MCF7_full	203	263	0.771863

## Sheet: S6.3
SIDP_set	gene_set	qvalue	count	obs_fraction	exp_fraction	odds_ratio
MCF7_Both_Exhausted	MCF7_-E2_Exhausted	8.04157e-303	188	1	0.0416955	23.9834
MCF7_Both_Exhausted	MCF7_+E2_Exhausted	2.37721e-219	188	1	0.082699	12.0921
MCF7_Both_Exhausted	LTED_Exhausted	1.85795e-144	176	0.93617	0.131315	7.1292
MCF7_Both_Exhausted	Essential_Genes	3.05895e-54	153	0.81383	0.271453	2.99805
MCF7_Both_Exhausted	REACTOME_METABOLISM_OF_RNA	3.1698e-15	44	0.234043	0.0557093	4.20114
MCF7_Both_Exhausted	REACTOME_CELL_CYCLE	6.5704e-13	38	0.202128	0.0484429	4.17249
MCF7_Both_Exhausted	REACTOME_RRNA_PROCESSING	1.03606e-12	22	0.117021	0.0152249	7.68617
MCF7_Both_Exhausted	REACTOME_CELLULAR_RESPONSES_TO_EXTERNAL_STIMULI	1.08813e-10	33	0.175532	0.0437716	4.01018
MCF7_Both_Exhausted	REACTOME_CELL_CYCLE_CHECKPOINTS	3.35001e-10	22	0.117021	0.0200692	5.83089
MCF7_Both_Exhausted	REACTOME_CELL_CYCLE_MITOTIC	3.98914e-09	29	0.154255	0.0394464	3.91051
MCF7_Both_Exhausted	REACTOME_M_PHASE	1.49711e-08	24	0.12766	0.0290657	4.3921
MCF7_Both_Exhausted	REACTOME_SEPARATION_OF_SISTER_CHROMATIDS	2.00758e-07	16	0.0851064	0.0147059	5.78723
MCF7_Both_Exhausted	REACTOME_MITOTIC_METAPHASE_AND_ANAPHASE	2.00758e-07	18	0.0957447	0.0188581	5.0771
MCF7_Both_Exhausted	REACTOME_INFLUENZA_INFECTION	7.23393e-07	14	0.0744681	0.0121107	6.14894
MCF7_Both_Exhausted	REACTOME_MITOTIC_PROMETAPHASE	9.07551e-07	16	0.0851064	0.016436	5.17805
MCF7_Both_Exhausted	REACTOME_REGULATION_OF_EXPRESSION_OF_SLITS_AND_ROBOS	1.59166e-06	14	0.0744681	0.0129758	5.73901
MCF7_Both_Exhausted	REACTOME_EUKARYOTIC_TRANSLATION_INITIATION	2.6235e-06	12	0.0638298	0.00968858	6.58815
MCF7_Both_Exhausted	REACTOME_RNA_POLYMERASE_II_TRANSCRIPTION	7.09464e-06	41	0.218085	0.0975779	2.23499
MCF7_Both_Exhausted	REACTOME_MITOTIC_SPINDLE_CHECKPOINT	9.03898e-06	11	0.0585106	0.00899654	6.50368
MCF7_Both_Exhausted	REACTOME_INFECTIOUS_DISEASE	1.00795e-05	30	0.159574	0.0605536	2.63526
MCF7_Both_Exhausted	REACTOME_CHROMOSOME_MAINTENANCE	2.5667e-05	9	0.0478723	0.00640138	7.47844
MCF7_Both_Exhausted	REACTOME_RESPONSE_OF_EIF2AK4_GCN2_TO_AMINO_ACID_DEFICIENCY	2.99619e-05	10	0.0531915	0.0083045	6.40514
MCF7_Both_Exhausted	REACTOME_HIV_INFECTION	3.34354e-05	15	0.0797872	0.0193772	4.11759
MCF7_Both_Exhausted	REACTOME_EUKARYOTIC_TRANSLATION_ELONGATION	4.35473e-05	9	0.0478723	0.00692042	6.91755
MCF7_Both_Exhausted	REACTOME_RNA_POLYMERASE_II_TRANSCRIBES_SNRNA_GENES	4.35473e-05	9	0.0478723	0.00692042	6.91755
MCF7_Both_Exhausted	REACTOME_SIGNALING_BY_ROBO_RECEPTORS	4.79939e-05	14	0.0744681	0.0176471	4.21986
MCF7_Both_Exhausted	REACTOME_PROCESSING_OF_CAPPED_INTRON_CONTAINING_PRE_MRNA	5.52842e-05	15	0.0797872	0.0204152	3.90822
MCF7_Both_Exhausted	HALLMARK_MYC_TARGETS_V1	5.62867e-05	14	0.0744681	0.0179931	4.13871
MCF7_Both_Exhausted	REACTOME_MITOTIC_G2_G2_M_PHASES	6.0921e-05	13	0.0691489	0.0157439	4.3921
MCF7_Both_Exhausted	REACTOME_RESOLUTION_OF_SISTER_CHROMATID_COHESION	6.78269e-05	10	0.0531915	0.00934256	5.69346
MCF7_Both_Exhausted	REACTOME_SELENOAMINO_ACID_METABOLISM	9.88637e-05	9	0.0478723	0.00778547	6.14894
MCF7_Both_Exhausted	REACTOME_G2_M_CHECKPOINTS	0.000105403	10	0.0531915	0.00986159	5.3938
MCF7_Both_Exhausted	REACTOME_NONSENSE_MEDIATED_DECAY_NMD_	0.000161535	9	0.0478723	0.0083045	5.76463
MCF7_Both_Exhausted	REACTOME_ACTIVATION_OF_THE_MRNA_UPON_BINDING_OF_THE_CAP_BINDING_COMPLEX_AND_EIFS_AND_SUBSEQUENT_BINDING_TO_43S	0.000243839	7	0.037234	0.0050173	7.42113
MCF7_Both_Exhausted	REACTOME_SRP_DEPENDENT_COTRANSLATIONAL_PROTEIN_TARGETING_TO_MEMBRANE	0.000253928	9	0.0478723	0.00882353	5.42553
MCF7_Both_Exhausted	REACTOME_RHO_GTPASES_ACTIVATE_FORMINS	0.000309752	10	0.0531915	0.0112457	4.72995
MCF7_Both_Exhausted	REACTOME_DNA_REPLICATION	0.000330765	9	0.0478723	0.00916955	5.22079
MCF7_Both_Exhausted	REACTOME_RECRUITMENT_OF_MITOTIC_CENTROSOME_PROTEINS_AND_COMPLEXES	0.000367341	8	0.0425532	0.00726644	5.85613
MCF7_Both_Exhausted	REACTOME_RRNA_MODIFICATION_IN_THE_NUCLEUS_AND_CYTOSOL	0.00050476	6	0.0319149	0.00397924	8.02035
MCF7_Both_Exhausted	REACTOME_SCF_SKP2_MEDIATED_DEGRADATION_OF_P27_P21	0.000508002	7	0.037234	0.00570934	6.5216
MCF7_Both_Exhausted	REACTOME_HIV_LIFE_CYCLE	0.000592143	10	0.0531915	0.0122837	4.33024
MCF7_Both_Exhausted	REACTOME_TELOMERE_MAINTENANCE	0.000608187	6	0.0319149	0.00415225	7.68617
MCF7_Both_Exhausted	REACTOME_S_PHASE	0.000627358	10	0.0531915	0.0124567	4.27009
MCF7_Both_Exhausted	REACTOME_RECRUITMENT_OF_NUMA_TO_MITOTIC_CENTROSOMES	0.000627358	8	0.0425532	0.00795848	5.3469
MCF7_Both_Exhausted	REACTOME_METABOLISM_OF_AMINO_ACIDS_AND_DERIVATIVES	0.000643222	15	0.0797872	0.0261246	3.05411
MCF7_Both_Exhausted	REACTOME_CELLULAR_RESPONSE_TO_HEAT_STRESS	0.00070331	8	0.0425532	0.00813149	5.23314
MCF7_Both_Exhausted	REACTOME_STABILIZATION_OF_P53	0.00110178	6	0.0319149	0.00467128	6.83215
MCF7_Both_Exhausted	REACTOME_DNA_REPAIR	0.00111438	13	0.0691489	0.0216263	3.19745
MCF7_Both_Exhausted	REACTOME_MRNA_SPLICING	0.0012156	11	0.0585106	0.016263	3.59778
MCF7_Both_Exhausted	REACTOME_APC_C_MEDIATED_DEGRADATION_OF_CELL_CYCLE_PROTEINS	0.00124025	7	0.037234	0.0067474	5.51828
MCF7_Both_Exhausted	REACTOME_SNRNP_ASSEMBLY	0.00154339	6	0.0319149	0.0050173	6.36097
MCF7_Both_Exhausted	REACTOME_TRANSCRIPTIONAL_REGULATION_BY_RUNX1	0.00165985	11	0.0585106	0.016955	3.45093
MCF7_Both_Exhausted	REACTOME_NUCLEOTIDE_EXCISION_REPAIR	0.00166233	8	0.0425532	0.00934256	4.55477
MCF7_Both_Exhausted	REACTOME_VIRAL_MESSENGER_RNA_SYNTHESIS	0.00188433	5	0.0265957	0.00346021	7.68617
MCF7_Both_Exhausted	REACTOME_TRANSLATION	0.00194343	13	0.0691489	0.0231834	2.98269
MCF7_Both_Exhausted	REACTOME_HDR_THROUGH_SINGLE_STRAND_ANNEALING_SSA_	0.00217169	4	0.0212766	0.00207612	10.2482
MCF7_Both_Exhausted	REACTOME_HOMOLOGOUS_DNA_PAIRING_AND_STRAND_EXCHANGE	0.00217169	4	0.0212766	0.00207612	10.2482
MCF7_Both_Exhausted	HALLMARK_E2F_TARGETS	0.00228232	10	0.0531915	0.0150519	3.53387
MCF7_Both_Exhausted	REACTOME_HCMV_INFECTION	0.00228232	7	0.037234	0.00761246	4.8912
MCF7_Both_Exhausted	REACTOME_TRANSCRIPTION_COUPLED_NUCLEOTIDE_EXCISION_REPAIR_TC_NER_	0.00230741	6	0.0319149	0.00553633	5.76463
MCF7_Both_Exhausted	REACTOME_APC_C_CDH1_MEDIATED_DEGRADATION_OF_CDC20_AND_OTHER_APC_C_CDH1_TARGETED_PROTEINS_IN_LATE_MITOSIS_EARLY_G1	0.0026142	6	0.0319149	0.00570934	5.58994
MCF7_Both_Exhausted	REACTOME_DEFECTIVE_CFTR_CAUSES_CYSTIC_FIBROSIS	0.0026142	6	0.0319149	0.00570934	5.58994
MCF7_Both_Exhausted	REACTOME_G1_S_DNA_DAMAGE_CHECKPOINTS	0.0026142	6	0.0319149	0.00570934	5.58994
MCF7_Both_Exhausted	REACTOME_CYCLIN_A_CDK2_ASSOCIATED_EVENTS_AT_S_PHASE_ENTRY	0.00278179	7	0.037234	0.00795848	4.67854
MCF7_Both_Exhausted	REACTOME_DISORDERS_OF_TRANSMEMBRANE_TRANSPORTERS	0.00287968	9	0.0478723	0.0129758	3.68936
MCF7_Both_Exhausted	REACTOME_PROCESSING_OF_DNA_DOUBLE_STRAND_BREAK_ENDS	0.00304447	5	0.0265957	0.00397924	6.68363
MCF7_Both_Exhausted	REACTOME_TRANSCRIPTIONAL_REGULATION_BY_SMALL_RNAS	0.00304447	5	0.0265957	0.00397924	6.68363
MCF7_Both_Exhausted	REACTOME_HOST_INTERACTIONS_OF_HIV_FACTORS	0.00335988	8	0.0425532	0.0107266	3.96706
MCF7_Both_Exhausted	REACTOME_UCH_PROTEINASES	0.00335988	7	0.037234	0.0083045	4.4836
MCF7_Both_Exhausted	REACTOME_DEPOSITION_OF_NEW_CENPA_CONTAINING_NUCLEOSOMES_AT_THE_CENTROMERE	0.00339756	4	0.0212766	0.00242215	8.78419
MCF7_Both_Exhausted	REACTOME_AURKA_ACTIVATION_BY_TPX2	0.00365869	6	0.0319149	0.00622837	5.12411
MCF7_Both_Exhausted	REACTOME_DNA_REPLICATION_PRE_INITIATION	0.00365869	6	0.0319149	0.00622837	5.12411
MCF7_Both_Exhausted	REACTOME_HEDGEHOG_LIGAND_BIOGENESIS	0.00365869	6	0.0319149	0.00622837	5.12411
MCF7_Both_Exhausted	REACTOME_CROSS_PRESENTATION_OF_SOLUBLE_EXOGENOUS_ANTIGENS_ENDOSOMES_	0.00412828	5	0.0265957	0.00432526	6.14894
MCF7_Both_Exhausted	REACTOME_ABC_TRANSPORTER_DISORDERS	0.00413719	6	0.0319149	0.00640138	4.98562
MCF7_Both_Exhausted	REACTOME_ACTIVATION_OF_ATR_IN_RESPONSE_TO_REPLICATION_STRESS	0.00415959	4	0.0212766	0.00259516	8.19858
MCF7_Both_Exhausted	REACTOME_GOLGI_TO_ER_RETROGRADE_TRANSPORT	0.00436058	7	0.037234	0.00882353	4.21986
MCF7_Both_Exhausted	REACTOME_DUAL_INCISION_IN_TC_NER	0.00466299	5	0.0265957	0.00449827	5.91244
MCF7_Both_Exhausted	REACTOME_MRNA_SPLICING_MINOR_PATHWAY	0.00466299	5	0.0265957	0.00449827	5.91244
MCF7_Both_Exhausted	REACTOME_DEGRADATION_OF_AXIN	0.00543616	5	0.0265957	0.00467128	5.69346
MCF7_Both_Exhausted	REACTOME_REGULATION_OF_RUNX3_EXPRESSION_AND_ACTIVITY	0.00543616	5	0.0265957	0.00467128	5.69346
MCF7_Both_Exhausted	REACTOME_REGULATION_OF_TP53_ACTIVITY_THROUGH_PHOSPHORYLATION	0.00569283	6	0.0319149	0.00692042	4.6117
MCF7_Both_Exhausted	REACTOME_SWITCHING_OF_ORIGINS_TO_A_POST_REPLICATIVE_STATE	0.00569283	6	0.0319149	0.00692042	4.6117
MCF7_Both_Exhausted	REACTOME_HCMV_EARLY_EVENTS	0.00616202	5	0.0265957	0.00484429	5.49012
MCF7_Both_Exhausted	REACTOME_EXTENSION_OF_TELOMERES	0.00616202	4	0.0212766	0.00294118	7.23404
MCF7_Both_Exhausted	REACTOME_REGULATION_OF_PLK1_ACTIVITY_AT_G2_M_TRANSITION	0.0062651	6	0.0319149	0.00709343	4.49922
MCF7_Both_Exhausted	REACTOME_MITOTIC_G1_PHASE_AND_G1_S_TRANSITION	0.00646424	8	0.0425532	0.0122837	3.46419
MCF7_Both_Exhausted	REACTOME_AUF1_HNRNP_D0_BINDS_AND_DESTABILIZES_MRNA	0.00682758	5	0.0265957	0.0050173	5.30081
MCF7_Both_Exhausted	REACTOME_DEGRADATION_OF_DVL	0.00682758	5	0.0265957	0.0050173	5.30081
MCF7_Both_Exhausted	REACTOME_HCMV_LATE_EVENTS	0.00682758	5	0.0265957	0.0050173	5.30081
MCF7_Both_Exhausted	HALLMARK_MYC_TARGETS_V2	0.00764071	5	0.0265957	0.00519031	5.12411
MCF7_Both_Exhausted	REACTOME_DECTIN_1_MEDIATED_NONCANONICAL_NF_KB_SIGNALING	0.00764071	5	0.0265957	0.00519031	5.12411
MCF7_Both_Exhausted	REACTOME_METABOLISM_OF_POLYAMINES	0.00764071	5	0.0265957	0.00519031	5.12411
MCF7_Both_Exhausted	REACTOME_NEGATIVE_REGULATION_OF_NOTCH4_SIGNALING	0.00764071	5	0.0265957	0.00519031	5.12411
MCF7_Both_Exhausted	REACTOME_AUTOPHAGY	0.00771921	8	0.0425532	0.0128028	3.32375
MCF7_Both_Exhausted	HALLMARK_G2M_CHECKPOINT	0.00778568	9	0.0478723	0.0157439	3.04068
MCF7_Both_Exhausted	REACTOME_TRANSCRIPTIONAL_REGULATION_BY_RUNX2	0.00819617	7	0.037234	0.0102076	3.64767
MCF7_Both_Exhausted	REACTOME_HDR_THROUGH_HOMOLOGOUS_RECOMBINATION_HRR_	0.00827187	4	0.0212766	0.0032872	6.47256
MCF7_Both_Exhausted	REACTOME_ASSEMBLY_OF_THE_PRE_REPLICATIVE_COMPLEX	0.00834122	5	0.0265957	0.00536332	4.95882
MCF7_Both_Exhausted	REACTOME_TRNA_PROCESSING_IN_THE_NUCLEUS	0.00834122	5	0.0265957	0.00536332	4.95882
MCF7_Both_Exhausted	REACTOME_RHO_GTPASE_EFFECTORS	0.00897986	11	0.0585106	0.0224913	2.60147
MCF7_Both_Exhausted	REACTOME_ANCHORING_OF_THE_BASAL_BODY_TO_THE_PLASMA_MEMBRANE	0.00959092	6	0.0319149	0.00795848	4.01018
MCF7_Both_Exhausted	REACTOME_RMTS_METHYLATE_HISTONE_ARGININES	0.00959092	4	0.0212766	0.00346021	6.14894
MCF7_Both_Exhausted	REACTOME_DISEASE	0.0101422	35	0.18617	0.118166	1.5755
MCF7_Both_Exhausted	REACTOME_DEGRADATION_OF_GLI1_BY_THE_PROTEASOME	0.0101422	5	0.0265957	0.00570934	4.65828
MCF7_Both_Exhausted	REACTOME_ORC1_REMOVAL_FROM_CHROMATIN	0.0101422	5	0.0265957	0.00570934	4.65828
MCF7_Both_Exhausted	REACTOME_REGULATION_OF_RAS_BY_GAPS	0.0101422	5	0.0265957	0.00570934	4.65828
MCF7_Both_Exhausted	REACTOME_THE_ROLE_OF_GTSE1_IN_G2_M_PROGRESSION_AFTER_G2_CHECKPOINT	0.0101422	5	0.0265957	0.00570934	4.65828
MCF7_Both_Exhausted	REACTOME_TRANSCRIPTION_OF_THE_HIV_GENOME	0.0101422	5	0.0265957	0.00570934	4.65828
MCF7_Both_Exhausted	REACTOME_G2_M_DNA_DAMAGE_CHECKPOINT	0.0108155	4	0.0212766	0.00363322	5.85613
MCF7_Both_Exhausted	REACTOME_ASYMMETRIC_LOCALIZATION_OF_PCP_PROTEINS	0.0113742	5	0.0265957	0.00588235	4.52128
MCF7_Both_Exhausted	REACTOME_ABC_FAMILY_PROTEINS_MEDIATED_TRANSPORT	0.0119593	6	0.0319149	0.00847751	3.76465
MCF7_Both_Exhausted	REACTOME_TRANSCRIPTIONAL_REGULATION_BY_RUNX3	0.0119593	6	0.0319149	0.00847751	3.76465
MCF7_Both_Exhausted	REACTOME_TRANSCRIPTIONAL_REGULATION_BY_TP53	0.0119593	13	0.0691489	0.0306228	2.25808
MCF7_Both_Exhausted	REACTOME_COPI_INDEPENDENT_GOLGI_TO_ER_RETROGRADE_TRAFFIC	0.0123274	4	0.0212766	0.00380623	5.58994
MCF7_Both_Exhausted	REACTOME_GENE_SILENCING_BY_RNA	0.0137559	5	0.0265957	0.00622837	4.27009
MCF7_Both_Exhausted	REACTOME_REGULATION_OF_HSF1_MEDIATED_HEAT_SHOCK_RESPONSE	0.0137559	5	0.0265957	0.00622837	4.27009
MCF7_Both_Exhausted	REACTOME_RUNX1_REGULATES_TRANSCRIPTION_OF_GENES_INVOLVED_IN_DIFFERENTIATION_OF_HSCS	0.0137559	5	0.0265957	0.00622837	4.27009
MCF7_Both_Exhausted	REACTOME_SUMOYLATION_OF_DNA_REPLICATION_PROTEINS	0.0140602	4	0.0212766	0.00397924	5.3469
MCF7_Both_Exhausted	REACTOME_CELLULAR_RESPONSE_TO_HYPOXIA	0.0149864	5	0.0265957	0.00640138	4.15469
MCF7_Both_Exhausted	REACTOME_REGULATION_OF_PTEN_STABILITY_AND_ACTIVITY	0.0149864	5	0.0265957	0.00640138	4.15469
MCF7_Both_Exhausted	REACTOME_TRANSPORT_OF_MATURE_TRANSCRIPT_TO_CYTOPLASM	0.0149864	5	0.0265957	0.00640138	4.15469
MCF7_Both_Exhausted	REACTOME_FORMATION_OF_TC_NER_PRE_INCISION_COMPLEX	0.0159155	4	0.0212766	0.00415225	5.12411
MCF7_Both_Exhausted	REACTOME_CILIUM_ASSEMBLY	0.0160281	8	0.0425532	0.0150519	2.8271
MCF7_Both_Exhausted	REACTOME_HOMOLOGY_DIRECTED_REPAIR	0.016278	5	0.0265957	0.00657439	4.04535
MCF7_Both_Exhausted	REACTOME_REGULATION_OF_RUNX2_EXPRESSION_AND_ACTIVITY	0.016278	5	0.0265957	0.00657439	4.04535
MCF7_Both_Exhausted	REACTOME_POSTMITOTIC_NUCLEAR_PORE_COMPLEX_NPC_REFORMATION	0.0168381	3	0.0159574	0.00224913	7.09493
MCF7_Both_Exhausted	REACTOME_REGULATION_OF_GLUCOKINASE_BY_GLUCOKINASE_REGULATORY_PROTEIN	0.0168381	3	0.0159574	0.00224913	7.09493
MCF7_Both_Exhausted	REACTOME_DOWNSTREAM_SIGNALING_EVENTS_OF_B_CELL_RECEPTOR_BCR_	0.0177672	5	0.0265957	0.0067474	3.94163
MCF7_Both_Exhausted	REACTOME_CHROMATIN_MODIFYING_ENZYMES	0.0189727	9	0.0478723	0.0188581	2.53855
MCF7_Both_Exhausted	REACTOME_HSP90_CHAPERONE_CYCLE_FOR_STEROID_HORMONE_RECEPTORS_SHR_	0.0196928	4	0.0212766	0.00449827	4.72995
MCF7_Both_Exhausted	REACTOME_TP53_REGULATES_TRANSCRIPTION_OF_DNA_REPAIR_GENES	0.0196928	4	0.0212766	0.00449827	4.72995
MCF7_Both_Exhausted	REACTOME_ATF4_ACTIVATES_GENES_IN_RESPONSE_TO_ENDOPLASMIC_RETICULUM_STRESS	0.0196928	3	0.0159574	0.00242215	6.58815
MCF7_Both_Exhausted	REACTOME_EXPORT_OF_VIRAL_RIBONUCLEOPROTEINS_FROM_NUCLEUS	0.0196928	3	0.0159574	0.00242215	6.58815
MCF7_Both_Exhausted	REACTOME_MRNA_CAPPING	0.0196928	3	0.0159574	0.00242215	6.58815
MCF7_Both_Exhausted	REACTOME_NUCLEAR_IMPORT_OF_REV_PROTEIN	0.0196928	3	0.0159574	0.00242215	6.58815
MCF7_Both_Exhausted	REACTOME_ATF6_ATF6_ALPHA_ACTIVATES_CHAPERONE_GENES	0.0203704	2	0.0106383	0.000865052	12.2979
MCF7_Both_Exhausted	REACTOME_DEGRADATION_OF_BETA_CATENIN_BY_THE_DESTRUCTION_COMPLEX	0.0203704	5	0.0265957	0.00709343	3.74935
MCF7_Both_Exhausted	REACTOME_FCERI_MEDIATED_NF_KB_ACTIVATION	0.0203704	5	0.0265957	0.00709343	3.74935
MCF7_Both_Exhausted	REACTOME_HEDGEHOG_ON_STATE	0.0223674	5	0.0265957	0.00726644	3.66008
MCF7_Both_Exhausted	REACTOME_HIV_ELONGATION_ARREST_AND_RECOVERY	0.0231826	3	0.0159574	0.00259516	6.14894
MCF7_Both_Exhausted	REACTOME_PTEN_REGULATION	0.0256956	7	0.037234	0.0134948	2.75914
MCF7_Both_Exhausted	REACTOME_REGULATION_OF_TP53_ACTIVITY	0.0256956	7	0.037234	0.0134948	2.75914
MCF7_Both_Exhausted	REACTOME_SIGNALING_BY_NOTCH4	0.0261884	5	0.0265957	0.00761246	3.49371
MCF7_Both_Exhausted	REACTOME_MITOCHONDRIAL_PROTEIN_IMPORT	0.0261884	4	0.0212766	0.0050173	4.24065
MCF7_Both_Exhausted	REACTOME_AGGREPHAGY	0.0261884	3	0.0159574	0.00276817	5.76463
MCF7_Both_Exhausted	REACTOME_INTERACTIONS_OF_VPR_WITH_HOST_CELLULAR_PROTEINS	0.0261884	3	0.0159574	0.00276817	5.76463
MCF7_Both_Exhausted	REACTOME_PERK_REGULATES_GENE_EXPRESSION	0.0261884	3	0.0159574	0.00276817	5.76463
MCF7_Both_Exhausted	REACTOME_SUMOYLATION_OF_UBIQUITINYLATION_PROTEINS	0.0261884	3	0.0159574	0.00276817	5.76463
MCF7_Both_Exhausted	REACTOME_TRANSPORT_OF_THE_SLBP_DEPENDANT_MATURE_MRNA	0.0261884	3	0.0159574	0.00276817	5.76463
MCF7_Both_Exhausted	REACTOME_ATF6_ATF6_ALPHA_ACTIVATES_CHAPERONES	0.0269748	2	0.0106383	0.00103806	10.2482
MCF7_Both_Exhausted	REACTOME_LAGGING_STRAND_SYNTHESIS	0.0269748	2	0.0106383	0.00103806	10.2482
MCF7_Both_Exhausted	REACTOME_HATS_ACETYLATE_HISTONES	0.0271879	5	0.0265957	0.00778547	3.41608
MCF7_Both_Exhausted	REACTOME_FORMATION_OF_RNA_POL_II_ELONGATION_COMPLEX_	0.0281815	4	0.0212766	0.00519031	4.09929
MCF7_Both_Exhausted	REACTOME_DISEASES_OF_MITOTIC_CELL_CYCLE	0.0294797	3	0.0159574	0.00294118	5.42553
MCF7_Both_Exhausted	REACTOME_INTERACTIONS_OF_REV_WITH_HOST_CELLULAR_PROTEINS	0.0294797	3	0.0159574	0.00294118	5.42553
MCF7_Both_Exhausted	REACTOME_NUCLEAR_PORE_COMPLEX_NPC_DISASSEMBLY	0.0294797	3	0.0159574	0.00294118	5.42553
MCF7_Both_Exhausted	REACTOME_SUMOYLATION_OF_SUMOYLATION_PROTEINS	0.0294797	3	0.0159574	0.00294118	5.42553
MCF7_Both_Exhausted	HALLMARK_MTORC1_SIGNALING	0.0306072	8	0.0425532	0.0176471	2.41135
MCF7_Both_Exhausted	REACTOME_ANTIGEN_PROCESSING_CROSS_PRESENTATION	0.0306072	5	0.0265957	0.00813149	3.27071
MCF7_Both_Exhausted	REACTOME_COPI_MEDIATED_ANTEROGRADE_TRANSPORT	0.0306072	5	0.0265957	0.00813149	3.27071
MCF7_Both_Exhausted	REACTOME_PCP_CE_PATHWAY	0.0306072	5	0.0265957	0.00813149	3.27071
MCF7_Both_Exhausted	REACTOME_INTRA_GOLGI_AND_RETROGRADE_GOLGI_TO_ER_TRAFFIC	0.0328694	7	0.037234	0.0145329	2.56206
MCF7_Both_Exhausted	REACTOME_TRANSPORT_OF_MATURE_MRNAS_DERIVED_FROM_INTRONLESS_TRANSCRIPTS	0.0332808	3	0.0159574	0.00311419	5.12411
MCF7_Both_Exhausted	REACTOME_FORMATION_OF_TUBULIN_FOLDING_INTERMEDIATES_BY_CCT_TRIC	0.0334425	2	0.0106383	0.00121107	8.78419
MCF7_Both_Exhausted	REACTOME_INHIBITION_OF_THE_PROTEOLYTIC_ACTIVITY_OF_APC_C_REQUIRED_FOR_THE_ONSET_OF_ANAPHASE_BY_MITOTIC_SPINDLE_CHECKPOINT_COMPONENTS	0.0334425	2	0.0106383	0.00121107	8.78419
MCF7_Both_Exhausted	REACTOME_TRANSLATION_OF_REPLICASE_AND_ASSEMBLY_OF_THE_REPLICATION_TRANSCRIPTION_COMPLEX	0.0334425	2	0.0106383	0.00121107	8.78419
MCF7_Both_Exhausted	REACTOME_TRANSLESION_SYNTHESIS_BY_POLH	0.0334425	2	0.0106383	0.00121107	8.78419
MCF7_Both_Exhausted	REACTOME_INTERLEUKIN_1_SIGNALING	0.0344266	5	0.0265957	0.00847751	3.13721
MCF7_Both_Exhausted	REACTOME_TNFR2_NON_CANONICAL_NF_KB_PATHWAY	0.0344266	5	0.0265957	0.00847751	3.13721
MCF7_Both_Exhausted	REACTOME_ACTIVATION_OF_ANTERIOR_HOX_GENES_IN_HINDBRAIN_DEVELOPMENT_DURING_EARLY_EMBRYOGENESIS	0.0351491	4	0.0212766	0.00570934	3.72663
MCF7_Both_Exhausted	REACTOME_DEUBIQUITINATION	0.0360037	9	0.0478723	0.0219723	2.17876
MCF7_Both_Exhausted	REACTOME_HIV_TRANSCRIPTION_ELONGATION	0.0360037	3	0.0159574	0.0032872	4.85442
MCF7_Both_Exhausted	REACTOME_NS1_MEDIATED_EFFECTS_ON_HOST_PATHWAYS	0.0360037	3	0.0159574	0.0032872	4.85442
MCF7_Both_Exhausted	REACTOME_MHC_CLASS_II_ANTIGEN_PRESENTATION	0.0360037	5	0.0265957	0.00865052	3.07447
MCF7_Both_Exhausted	REACTOME_REGULATION_OF_MRNA_STABILITY_BY_PROTEINS_THAT_BIND_AU_RICH_ELEMENTS	0.0360037	5	0.0265957	0.00865052	3.07447
MCF7_Both_Exhausted	REACTOME_TCF_DEPENDENT_SIGNALING_IN_RESPONSE_TO_WNT	0.0378808	7	0.037234	0.0152249	2.4456
MCF7_Both_Exhausted	REACTOME_UB_SPECIFIC_PROCESSING_PROTEASES	0.0378808	7	0.037234	0.0152249	2.4456
MCF7_Both_Exhausted	REACTOME_ER_TO_GOLGI_ANTEROGRADE_TRANSPORT	0.0380075	6	0.0319149	0.0119377	2.67345
MCF7_Both_Exhausted	REACTOME_PKMTS_METHYLATE_HISTONE_LYSINES	0.0396838	3	0.0159574	0.00346021	4.6117
MCF7_Both_Exhausted	REACTOME_NUCLEAR_ENVELOPE_NE_REASSEMBLY	0.0396838	4	0.0212766	0.00605536	3.51368
MCF7_Both_Exhausted	REACTOME_APC_CDC20_MEDIATED_DEGRADATION_OF_NEK2A	0.0396838	2	0.0106383	0.00138408	7.68617
MCF7_Both_Exhausted	REACTOME_FOXO_MEDIATED_TRANSCRIPTION_OF_CELL_DEATH_GENES	0.0396838	2	0.0106383	0.00138408	7.68617
MCF7_Both_Exhausted	REACTOME_DNA_DOUBLE_STRAND_BREAK_REPAIR	0.0396838	5	0.0265957	0.00899654	2.95622
MCF7_Both_Exhausted	REACTOME_SIGNALING_BY_THE_B_CELL_RECEPTOR_BCR_	0.0396838	5	0.0265957	0.00899654	2.95622
MCF7_Both_Exhausted	REACTOME_TRNA_PROCESSING	0.0396838	5	0.0265957	0.00899654	2.95622
MCF7_Both_Exhausted	REACTOME_ORGANELLE_BIOGENESIS_AND_MAINTENANCE	0.0416253	9	0.0478723	0.0228374	2.09623
MCF7_Both_Exhausted	REACTOME_TCR_SIGNALING	0.0422466	5	0.0265957	0.00916955	2.90044
MCF7_Both_Exhausted	REACTOME_CLEC7A_DECTIN_1_SIGNALING	0.0451321	5	0.0265957	0.00934256	2.84673
MCF7_Both_Exhausted	REACTOME_REGULATION_OF_LIPID_METABOLISM_BY_PPARALPHA	0.0478074	5	0.0265957	0.00951557	2.79497
MCF7_Both_Exhausted	REACTOME_SIGNALING_BY_HEDGEHOG	0.0478074	6	0.0319149	0.0128028	2.49281
MCF7_Both_Exhausted	REACTOME_RAS_PROCESSING	0.0478074	2	0.0106383	0.00155709	6.83215
MCF7_Both_Exhausted	REACTOME_DEVELOPMENTAL_BIOLOGY	0.0478074	21	0.111702	0.0731834	1.52633
MCF7_Both_Exhausted	REACTOME_ACTIVATION_OF_GENE_EXPRESSION_BY_SREBF_SREBP_	0.0478074	3	0.0159574	0.00380623	4.19246
MCF7_Both_Exhausted	REACTOME_HIV_TRANSCRIPTION_INITIATION	0.0478074	3	0.0159574	0.00380623	4.19246
MCF7_Both_Exhausted	REACTOME_RUNX1_REGULATES_GENES_INVOLVED_IN_MEGAKARYOCYTE_DIFFERENTIATION_AND_PLATELET_FUNCTION	0.0478074	3	0.0159574	0.00380623	4.19246
MCF7_Both_Exhausted	REACTOME_HEDGEHOG_OFF_STATE	0.0527991	5	0.0265957	0.00986159	2.6969
MCF7_Both_Exhausted	REACTOME_MAPK6_MAPK4_SIGNALING	0.0527991	5	0.0265957	0.00986159	2.6969
MCF7_Both_Exhausted	REACTOME_COOPERATION_OF_PREFOLDIN_AND_TRIC_CCT_IN_ACTIN_AND_TUBULIN_FOLDING	0.0556281	2	0.0106383	0.0017301	6.14894
MCF7_Both_Exhausted	REACTOME_INHIBITION_OF_DNA_RECOMBINATION_AT_TELOMERE	0.0556281	2	0.0106383	0.0017301	6.14894
MCF7_Both_Exhausted	REACTOME_SIGNALING_BY_FGFR2_IIIA_TM	0.0556281	2	0.0106383	0.0017301	6.14894
MCF7_Both_Exhausted	REACTOME_TELOMERE_C_STRAND_LAGGING_STRAND_SYNTHESIS	0.0556281	2	0.0106383	0.0017301	6.14894
MCF7_Both_Exhausted	REACTOME_TELOMERE_EXTENSION_BY_TELOMERASE	0.0556281	2	0.0106383	0.0017301	6.14894
MCF7_Both_Exhausted	REACTOME_SARS_COV_1_INFECTION	0.0639261	3	0.0159574	0.00432526	3.68936
MCF7_Both_Exhausted	REACTOME_TRANSPORT_TO_THE_GOLGI_AND_SUBSEQUENT_MODIFICATION	0.0649618	6	0.0319149	0.0140138	2.27738
MCF7_Both_Exhausted	REACTOME_ANTIGEN_PROCESSING_UBIQUITINATION_PROTEASOME_DEGRADATION	0.0649618	9	0.0478723	0.0252595	1.89522
MCF7_Both_Exhausted	REACTOME_ABERRANT_REGULATION_OF_MITOTIC_G1_S_TRANSITION_IN_CANCER_DUE_TO_RB1_DEFECTS	0.0649618	2	0.0106383	0.00190311	5.58994
MCF7_Both_Exhausted	REACTOME_MTORC1_MEDIATED_SIGNALLING	0.0649618	2	0.0106383	0.00190311	5.58994
MCF7_Both_Exhausted	REACTOME_INTERLEUKIN_1_FAMILY_SIGNALING	0.0719991	5	0.0265957	0.0108997	2.44005
MCF7_Both_Exhausted	REACTOME_SIGNALING_BY_RHO_GTPASES	0.0733244	11	0.0585106	0.034083	1.71671
MCF7_Both_Exhausted	REACTOME_NUCLEAR_ENVELOPE_BREAKDOWN	0.0733244	3	0.0159574	0.00467128	3.41608
MCF7_Both_Exhausted	REACTOME_REGULATION_OF_CHOLESTEROL_BIOSYNTHESIS_BY_SREBP_SREBF_	0.0733244	3	0.0159574	0.00467128	3.41608
MCF7_Both_Exhausted	REACTOME_SUMOYLATION_OF_RNA_BINDING_PROTEINS	0.0733244	3	0.0159574	0.00467128	3.41608
MCF7_Both_Exhausted	REACTOME_ABORTIVE_ELONGATION_OF_HIV_1_TRANSCRIPT_IN_THE_ABSENCE_OF_TAT	0.0733244	2	0.0106383	0.00207612	5.12411
MCF7_Both_Exhausted	REACTOME_PIWI_INTERACTING_RNA_PIRNA_BIOGENESIS	0.0733244	2	0.0106383	0.00207612	5.12411
MCF7_Both_Exhausted	REACTOME_TRANSLESION_SYNTHESIS_BY_Y_FAMILY_DNA_POLYMERASES_BYPASSES_LESIONS_ON_DNA_TEMPLATE	0.0733244	2	0.0106383	0.00207612	5.12411
MCF7_Both_Exhausted	REACTOME_FC_EPSILON_RECEPTOR_FCERI_SIGNALING	0.0733244	5	0.0265957	0.0110727	2.40193
MCF7_Both_Exhausted	REACTOME_SUMOYLATION_OF_CHROMATIN_ORGANIZATION_PROTEINS	0.0794297	3	0.0159574	0.00484429	3.29407
MCF7_Both_Exhausted	REACTOME_NERVOUS_SYSTEM_DEVELOPMENT	0.0795863	14	0.0744681	0.0474048	1.5709
MCF7_Both_Exhausted	REACTOME_C_TYPE_LECTIN_RECEPTORS_CLRS_	0.080558	5	0.0265957	0.0114187	2.32914
MCF7_Both_Exhausted	REACTOME_NEDDYLATION	0.0817084	7	0.037234	0.0188581	1.97443
MCF7_Both_Exhausted	REACTOME_DNA_STRAND_ELONGATION	0.0827446	2	0.0106383	0.00224913	4.72995
MCF7_Both_Exhausted	HALLMARK_DNA_REPAIR	0.0837239	5	0.0265957	0.0115917	2.29438
MCF7_Both_Exhausted	REACTOME_ESTROGEN_DEPENDENT_GENE_EXPRESSION	0.0879488	4	0.0212766	0.0083045	2.56206
MCF7_Both_Exhausted	REACTOME_ADAPTIVE_IMMUNE_SYSTEM	0.0906323	15	0.0797872	0.0529412	1.50709
MCF7_Both_Exhausted	REACTOME_AMINO_ACIDS_REGULATE_MTORC1	0.0906323	3	0.0159574	0.00519031	3.07447
MCF7_Both_Exhausted	REACTOME_FANCONI_ANEMIA_PATHWAY	0.0920371	2	0.0106383	0.00242215	4.3921
MCF7_Both_Exhausted	REACTOME_ONCOGENE_INDUCED_SENESCENCE	0.0920371	2	0.0106383	0.00242215	4.3921
MCF7_Both_Exhausted	REACTOME_SIGNALING_BY_NOTCH	0.0966905	6	0.0319149	0.015917	2.00509
MCF7_Both_Exhausted	REACTOME_DNA_DAMAGE_BYPASS	0.102198	2	0.0106383	0.00259516	4.09929
MCF7_Both_Exhausted	REACTOME_FGFR2_ALTERNATIVE_SPLICING	0.102198	2	0.0106383	0.00259516	4.09929
MCF7_Both_Exhausted	REACTOME_MICRORNA_MIRNA_BIOGENESIS	0.102198	2	0.0106383	0.00259516	4.09929
MCF7_Both_Exhausted	REACTOME_FOXO_MEDIATED_TRANSCRIPTION	0.102526	3	0.0159574	0.00553633	2.88231
MCF7_Both_Exhausted	REACTOME_ASPARAGINE_N_LINKED_GLYCOSYLATION	0.106276	8	0.0425532	0.0243945	1.74438
MCF7_Both_Exhausted	REACTOME_COPI_DEPENDENT_GOLGI_TO_ER_RETROGRADE_TRAFFIC	0.108799	3	0.0159574	0.00570934	2.79497
MCF7_Both_Exhausted	REACTOME_RNA_POLYMERASE_II_TRANSCRIPTION_TERMINATION	0.108799	3	0.0159574	0.00570934	2.79497
MCF7_Both_Exhausted	REACTOME_BETA_CATENIN_INDEPENDENT_WNT_SIGNALING	0.110027	5	0.0265957	0.0128028	2.07734
MCF7_Both_Exhausted	REACTOME_BUDDING_AND_MATURATION_OF_HIV_VIRION	0.110108	2	0.0106383	0.00276817	3.84309
MCF7_Both_Exhausted	REACTOME_FORMATION_OF_THE_EARLY_ELONGATION_COMPLEX	0.110108	2	0.0106383	0.00276817	3.84309
MCF7_Both_Exhausted	REACTOME_LATE_ENDOSOMAL_MICROAUTOPHAGY	0.110108	2	0.0106383	0.00276817	3.84309
MCF7_Both_Exhausted	REACTOME_SENESCENCE_ASSOCIATED_SECRETORY_PHENOTYPE_SASP_	0.110108	2	0.0106383	0.00276817	3.84309
MCF7_Both_Exhausted	REACTOME_GLYCOLYSIS	0.113712	3	0.0159574	0.00588235	2.71277
MCF7_Both_Exhausted	REACTOME_SELECTIVE_AUTOPHAGY	0.118762	3	0.0159574	0.00605536	2.63526
MCF7_Both_Exhausted	REACTOME_ENERGY_DEPENDENT_REGULATION_OF_MTOR_BY_LKB1_AMPK	0.118762	2	0.0106383	0.00294118	3.61702
MCF7_Both_Exhausted	REACTOME_FGFR2_MUTANT_RECEPTOR_ACTIVATION	0.118762	2	0.0106383	0.00294118	3.61702
MCF7_Both_Exhausted	REACTOME_FORMATION_OF_THE_BETA_CATENIN_TCF_TRANSACTIVATING_COMPLEX	0.118762	2	0.0106383	0.00294118	3.61702
MCF7_Both_Exhausted	REACTOME_REGULATION_OF_TP53_EXPRESSION_AND_DEGRADATION	0.118762	2	0.0106383	0.00294118	3.61702
MCF7_Both_Exhausted	REACTOME_TRANSCRIPTIONAL_REGULATION_BY_VENTX	0.118762	2	0.0106383	0.00294118	3.61702
MCF7_Both_Exhausted	REACTOME_CLASS_I_MHC_MEDIATED_ANTIGEN_PROCESSING_PRESENTATION	0.12501	9	0.0478723	0.0299308	1.59943
MCF7_Both_Exhausted	REACTOME_ASSOCIATION_OF_TRIC_CCT_WITH_TARGET_PROTEINS_DURING_BIOSYNTHESIS	0.127264	2	0.0106383	0.00311419	3.41608
MCF7_Both_Exhausted	REACTOME_COOPERATION_OF_PDCL_PHLP1_AND_TRIC_CCT_IN_G_PROTEIN_BETA_FOLDING	0.127264	2	0.0106383	0.00311419	3.41608
MCF7_Both_Exhausted	REACTOME_DETOXIFICATION_OF_REACTIVE_OXYGEN_SPECIES	0.127264	2	0.0106383	0.00311419	3.41608
MCF7_Both_Exhausted	REACTOME_ENDOSOMAL_SORTING_COMPLEX_REQUIRED_FOR_TRANSPORT_ESCRT_	0.127264	2	0.0106383	0.00311419	3.41608
MCF7_Both_Exhausted	REACTOME_MEIOSIS	0.127264	2	0.0106383	0.00311419	3.41608
MCF7_Both_Exhausted	REACTOME_SPHINGOLIPID_DE_NOVO_BIOSYNTHESIS	0.127264	2	0.0106383	0.00311419	3.41608
MCF7_Both_Exhausted	REACTOME_ANTIVIRAL_MECHANISM_BY_IFN_STIMULATED_GENES	0.130268	3	0.0159574	0.00640138	2.49281
MCF7_Both_Exhausted	REACTOME_CELLULAR_SENESCENCE	0.130957	4	0.0212766	0.0100346	2.12032
MCF7_Both_Exhausted	REACTOME_OXIDATIVE_STRESS_INDUCED_SENESCENCE	0.136629	3	0.0159574	0.00657439	2.42721
MCF7_Both_Exhausted	REACTOME_SLC_TRANSPORTER_DISORDERS	0.136629	3	0.0159574	0.00657439	2.42721
MCF7_Both_Exhausted	HALLMARK_MITOTIC_SPINDLE	0.137373	6	0.0319149	0.0181661	1.75684
MCF7_Both_Exhausted	REACTOME_GLOBAL_GENOME_NUCLEOTIDE_EXCISION_REPAIR_GG_NER_	0.143559	3	0.0159574	0.0067474	2.36498
MCF7_Both_Exhausted	REACTOME_DNA_DAMAGE_RECOGNITION_IN_GG_NER	0.147015	2	0.0106383	0.00346021	3.07447
MCF7_Both_Exhausted	REACTOME_GENE_AND_PROTEIN_EXPRESSION_BY_JAK_STAT_SIGNALING_AFTER_INTERLEUKIN_12_STIMULATION	0.147015	2	0.0106383	0.00346021	3.07447
MCF7_Both_Exhausted	REACTOME_PROTEIN_UBIQUITINATION	0.149407	3	0.0159574	0.00692042	2.30585
MCF7_Both_Exhausted	REACTOME_TRANSCRIPTIONAL_REGULATION_OF_WHITE_ADIPOCYTE_DIFFERENTIATION	0.149407	3	0.0159574	0.00692042	2.30585
MCF7_Both_Exhausted	REACTOME_SUMOYLATION_OF_DNA_DAMAGE_RESPONSE_AND_REPAIR_PROTEINS	0.156979	3	0.0159574	0.00709343	2.24961
MCF7_Both_Exhausted	REACTOME_CHREBP_ACTIVATES_METABOLIC_GENE_EXPRESSION	0.15811	1	0.00531915	0.000865052	6.14894
MCF7_Both_Exhausted	REACTOME_COENZYME_A_BIOSYNTHESIS	0.15811	1	0.00531915	0.000865052	6.14894
MCF7_Both_Exhausted	REACTOME_PCNA_DEPENDENT_LONG_PATCH_BASE_EXCISION_REPAIR	0.15811	1	0.00531915	0.000865052	6.14894
MCF7_Both_Exhausted	REACTOME_POLYMERASE_SWITCHING	0.15811	1	0.00531915	0.000865052	6.14894
MCF7_Both_Exhausted	REACTOME_PROCESSIVE_SYNTHESIS_ON_THE_C_STRAND_OF_THE_TELOMERE	0.15811	1	0.00531915	0.000865052	6.14894
MCF7_Both_Exhausted	REACTOME_REGULATION_OF_FOXO_TRANSCRIPTIONAL_ACTIVITY_BY_ACETYLATION	0.15811	1	0.00531915	0.000865052	6.14894
MCF7_Both_Exhausted	REACTOME_TRANSLESION_SYNTHESIS_BY_POLK	0.15811	1	0.00531915	0.000865052	6.14894
MCF7_Both_Exhausted	REACTOME_MITOTIC_PROPHASE	0.16043	3	0.0159574	0.00726644	2.19605
MCF7_Both_Exhausted	REACTOME_FLT3_SIGNALING	0.161792	7	0.037234	0.0237024	1.5709
MCF7_Both_Exhausted	REACTOME_SIGNALING_BY_WNT	0.161792	7	0.037234	0.0237024	1.5709
MCF7_Both_Exhausted	REACTOME_HSF1_DEPENDENT_TRANSACTIVATION	0.162859	2	0.0106383	0.00380623	2.79497
MCF7_Both_Exhausted	REACTOME_PROTEIN_FOLDING	0.165572	3	0.0159574	0.00743945	2.14498
MCF7_Both_Exhausted	REACTOME_SARS_COV_INFECTIONS	0.165572	3	0.0159574	0.00743945	2.14498
MCF7_Both_Exhausted	REACTOME_PROGRAMMED_CELL_DEATH	0.170199	5	0.0265957	0.0155709	1.70804
MCF7_Both_Exhausted	REACTOME_CYCLIN_D_ASSOCIATED_EVENTS_IN_G1	0.171254	2	0.0106383	0.00397924	2.67345
MCF7_Both_Exhausted	REACTOME_SIGNALING_BY_FGFR2_IN_DISEASE	0.171254	2	0.0106383	0.00397924	2.67345
MCF7_Both_Exhausted	REACTOME_GLUCOSE_METABOLISM	0.171254	3	0.0159574	0.00761246	2.09623
MCF7_Both_Exhausted	REACTOME_SIGNALING_BY_INTERLEUKINS	0.171891	9	0.0478723	0.033218	1.44116
MCF7_Both_Exhausted	REACTOME_ABERRANT_REGULATION_OF_MITOTIC_EXIT_IN_CANCER_DUE_TO_RB1_DEFECTS	0.173983	1	0.00531915	0.00103806	5.12411
MCF7_Both_Exhausted	REACTOME_CONVERSION_FROM_APC_C_CDC20_TO_APC_C_CDH1_IN_LATE_ANAPHASE	0.173983	1	0.00531915	0.00103806	5.12411
MCF7_Both_Exhausted	REACTOME_GAP_FILLING_DNA_REPAIR_SYNTHESIS_AND_LIGATION_IN_GG_NER	0.173983	1	0.00531915	0.00103806	5.12411
MCF7_Both_Exhausted	REACTOME_JOSEPHIN_DOMAIN_DUBS	0.173983	1	0.00531915	0.00103806	5.12411
MCF7_Both_Exhausted	REACTOME_MITOCHONDRIAL_TRNA_AMINOACYLATION	0.173983	1	0.00531915	0.00103806	5.12411
MCF7_Both_Exhausted	REACTOME_RESOLUTION_OF_AP_SITES_VIA_THE_MULTIPLE_NUCLEOTIDE_PATCH_REPLACEMENT_PATHWAY	0.173983	1	0.00531915	0.00103806	5.12411
MCF7_Both_Exhausted	REACTOME_RUNX3_REGULATES_P14_ARF	0.173983	1	0.00531915	0.00103806	5.12411
MCF7_Both_Exhausted	REACTOME_THE_NLRP3_INFLAMMASOME	0.173983	1	0.00531915	0.00103806	5.12411
MCF7_Both_Exhausted	REACTOME_TRANSPORT_OF_NUCLEOSIDES_AND_FREE_PURINE_AND_PYRIMIDINE_BASES_ACROSS_THE_PLASMA_MEMBRANE	0.173983	1	0.00531915	0.00103806	5.12411
MCF7_Both_Exhausted	REACTOME_MTOR_SIGNALLING	0.175981	2	0.0106383	0.00415225	2.56206
MCF7_Both_Exhausted	REACTOME_SIGNALING_BY_PTK6	0.186792	2	0.0106383	0.00432526	2.45957
MCF7_Both_Exhausted	REACTOME_UNFOLDED_PROTEIN_RESPONSE_UPR_	0.187351	3	0.0159574	0.00813149	1.96243
MCF7_Both_Exhausted	REACTOME_INTERLEUKIN_12_SIGNALING	0.191296	2	0.0106383	0.00449827	2.36498
MCF7_Both_Exhausted	MCF7_+E2_Expanded	0.191296	1	0.00531915	0.00121107	4.3921
MCF7_Both_Exhausted	REACTOME_CRISTAE_FORMATION	0.191296	1	0.00531915	0.00121107	4.3921
MCF7_Both_Exhausted	REACTOME_INFLAMMASOMES	0.191296	1	0.00531915	0.00121107	4.3921
MCF7_Both_Exhausted	REACTOME_PHOSPHORYLATION_OF_THE_APC_C	0.191296	1	0.00531915	0.00121107	4.3921
MCF7_Both_Exhausted	REACTOME_POST_CHAPERONIN_TUBULIN_FOLDING_PATHWAY	0.191296	1	0.00531915	0.00121107	4.3921
MCF7_Both_Exhausted	REACTOME_PROCESSING_OF_SMDT1	0.191296	1	0.00531915	0.00121107	4.3921
MCF7_Both_Exhausted	REACTOME_PURINE_RIBONUCLEOSIDE_MONOPHOSPHATE_BIOSYNTHESIS	0.191296	1	0.00531915	0.00121107	4.3921
MCF7_Both_Exhausted	REACTOME_RESOLUTION_OF_D_LOOP_STRUCTURES_THROUGH_SYNTHESIS_DEPENDENT_STRAND_ANNEALING_SDSA_	0.191296	1	0.00531915	0.00121107	4.3921
MCF7_Both_Exhausted	REACTOME_TERMINATION_OF_TRANSLESION_DNA_SYNTHESIS	0.191296	1	0.00531915	0.00121107	4.3921
MCF7_Both_Exhausted	REACTOME_TP53_REGULATES_METABOLIC_GENES	0.196243	3	0.0159574	0.00847751	1.88233
MCF7_Both_Exhausted	HALLMARK_REACTIVE_OXYGEN_SPECIES_PATHWAY	0.200353	2	0.0106383	0.00467128	2.27738
MCF7_Both_Exhausted	REACTOME_REPRODUCTION	0.200353	2	0.0106383	0.00467128	2.27738
MCF7_Both_Exhausted	REACTOME_DISEASES_OF_SIGNAL_TRANSDUCTION_BY_GROWTH_FACTOR_RECEPTORS_AND_SECOND_MESSENGERS	0.203597	9	0.0478723	0.0354671	1.34977
MCF7_Both_Exhausted	REACTOME_E3_UBIQUITIN_LIGASES_UBIQUITINATE_TARGET_PROTEINS	0.205786	2	0.0106383	0.00484429	2.19605
MCF7_Both_Exhausted	REACTOME_APC_C_CDC20_MEDIATED_DEGRADATION_OF_CYCLIN_B	0.205786	1	0.00531915	0.00138408	3.84309
MCF7_Both_Exhausted	REACTOME_MRNA_DECAY_BY_5_TO_3_EXORIBONUCLEASE	0.205786	1	0.00531915	0.00138408	3.84309
MCF7_Both_Exhausted	REACTOME_PROTEIN_METHYLATION	0.205786	1	0.00531915	0.00138408	3.84309
MCF7_Both_Exhausted	REACTOME_RECOGNITION_OF_DNA_DAMAGE_BY_PCNA_CONTAINING_REPLICATION_COMPLEX	0.205786	1	0.00531915	0.00138408	3.84309
MCF7_Both_Exhausted	REACTOME_REGULATION_OF_TP53_ACTIVITY_THROUGH_METHYLATION	0.205786	1	0.00531915	0.00138408	3.84309
MCF7_Both_Exhausted	REACTOME_RNA_POLYMERASE_III_CHAIN_ELONGATION	0.205786	1	0.00531915	0.00138408	3.84309
MCF7_Both_Exhausted	REACTOME_SYNTHESIS_OF_PIPS_AT_THE_GOLGI_MEMBRANE	0.205786	1	0.00531915	0.00138408	3.84309
MCF7_Both_Exhausted	REACTOME_TRNA_AMINOACYLATION	0.205786	1	0.00531915	0.00138408	3.84309
MCF7_Both_Exhausted	REACTOME_VITAMIN_B5_PANTOTHENATE_METABOLISM	0.205786	1	0.00531915	0.00138408	3.84309
MCF7_Both_Exhausted	REACTOME_INTERLEUKIN_12_FAMILY_SIGNALING	0.22371	2	0.0106383	0.00519031	2.04965
MCF7_Both_Exhausted	REACTOME_POLYMERASE_SWITCHING_ON_THE_C_STRAND_OF_THE_TELOMERE	0.22371	1	0.00531915	0.00155709	3.41608
MCF7_Both_Exhausted	REACTOME_PURINERGIC_SIGNALING_IN_LEISHMANIASIS_INFECTION	0.22371	1	0.00531915	0.00155709	3.41608
MCF7_Both_Exhausted	REACTOME_RESOLUTION_OF_D_LOOP_STRUCTURES	0.22371	1	0.00531915	0.00155709	3.41608
MCF7_Both_Exhausted	REACTOME_SLBP_DEPENDENT_PROCESSING_OF_REPLICATION_DEPENDENT_HISTONE_PRE_MRNAS	0.22371	1	0.00531915	0.00155709	3.41608
MCF7_Both_Exhausted	REACTOME_TP53_REGULATES_TRANSCRIPTION_OF_SEVERAL_ADDITIONAL_CELL_DEATH_GENES_WHOSE_SPECIFIC_ROLES_IN_P53_DEPENDENT_APOPTOSIS_REMAIN_UNCERTAIN	0.22371	1	0.00531915	0.00155709	3.41608
MCF7_Both_Exhausted	REACTOME_COPII_MEDIATED_VESICLE_TRANSPORT	0.231452	2	0.0106383	0.00536332	1.98353
MCF7_Both_Exhausted	REACTOME_PROTEIN_LOCALIZATION	0.23271	4	0.0212766	0.0140138	1.51826
MCF7_Both_Exhausted	REACTOME_ESR_MEDIATED_SIGNALING	0.237434	4	0.0212766	0.0141869	1.49974
MCF7_Both_Exhausted	REACTOME_ACTIVATION_OF_THE_PRE_REPLICATIVE_COMPLEX	0.237434	1	0.00531915	0.0017301	3.07447
MCF7_Both_Exhausted	REACTOME_ASSEMBLY_OF_THE_HIV_VIRION	0.237434	1	0.00531915	0.0017301	3.07447
MCF7_Both_Exhausted	REACTOME_DISEASES_ASSOCIATED_WITH_GLYCOSYLATION_PRECURSOR_BIOSYNTHESIS	0.237434	1	0.00531915	0.0017301	3.07447
MCF7_Both_Exhausted	REACTOME_MITOCHONDRIAL_IRON_SULFUR_CLUSTER_BIOGENESIS	0.237434	1	0.00531915	0.0017301	3.07447
MCF7_Both_Exhausted	REACTOME_NUCLEOBASE_BIOSYNTHESIS	0.237434	1	0.00531915	0.0017301	3.07447
MCF7_Both_Exhausted	REACTOME_PENTOSE_PHOSPHATE_PATHWAY	0.237434	1	0.00531915	0.0017301	3.07447
MCF7_Both_Exhausted	REACTOME_RESPONSE_OF_EIF2AK1_HRI_TO_HEME_DEFICIENCY	0.237434	1	0.00531915	0.0017301	3.07447
MCF7_Both_Exhausted	REACTOME_REGULATION_OF_PTEN_GENE_TRANSCRIPTION	0.245066	2	0.0106383	0.00570934	1.86331
MCF7_Both_Exhausted	REACTOME_MAPK_FAMILY_SIGNALING_CASCADES	0.251306	7	0.037234	0.0288927	1.2887
MCF7_Both_Exhausted	HALLMARK_UNFOLDED_PROTEIN_RESPONSE	0.251306	3	0.0159574	0.0102076	1.56329
MCF7_Both_Exhausted	REACTOME_CHOLESTEROL_BIOSYNTHESIS	0.253386	1	0.00531915	0.00190311	2.79497
MCF7_Both_Exhausted	REACTOME_INTERCONVERSION_OF_NUCLEOTIDE_DI_AND_TRIPHOSPHATES	0.253386	1	0.00531915	0.00190311	2.79497
MCF7_Both_Exhausted	REACTOME_CYTOKINE_SIGNALING_IN_IMMUNE_SYSTEM	0.256338	14	0.0744681	0.0636678	1.16963
MCF7_Both_Exhausted	REACTOME_POST_TRANSLATIONAL_PROTEIN_MODIFICATION	0.261573	23	0.12234	0.109516	1.11711
MCF7_Both_Exhausted	REACTOME_BBSOME_MEDIATED_CARGO_TARGETING_TO_CILIUM	0.263858	1	0.00531915	0.00207612	2.56206
MCF7_Both_Exhausted	REACTOME_CARGO_CONCENTRATION_IN_THE_ER	0.263858	1	0.00531915	0.00207612	2.56206
MCF7_Both_Exhausted	REACTOME_CD28_DEPENDENT_PI3K_AKT_SIGNALING	0.263858	1	0.00531915	0.00207612	2.56206
MCF7_Both_Exhausted	REACTOME_ESTROGEN_DEPENDENT_NUCLEAR_EVENTS_DOWNSTREAM_OF_ESR_MEMBRANE_SIGNALING	0.263858	1	0.00531915	0.00207612	2.56206
MCF7_Both_Exhausted	REACTOME_KERATAN_SULFATE_BIOSYNTHESIS	0.263858	1	0.00531915	0.00207612	2.56206
MCF7_Both_Exhausted	REACTOME_MITOCHONDRIAL_CALCIUM_ION_TRANSPORT	0.263858	1	0.00531915	0.00207612	2.56206
MCF7_Both_Exhausted	REACTOME_RHO_GTPASES_ACTIVATE_CIT	0.263858	1	0.00531915	0.00207612	2.56206
MCF7_Both_Exhausted	REACTOME_RNA_POLYMERASE_III_TRANSCRIPTION_TERMINATION	0.263858	1	0.00531915	0.00207612	2.56206
MCF7_Both_Exhausted	REACTOME_SIGNALING_BY_FGFR_IN_DISEASE	0.263858	2	0.0106383	0.00622837	1.70804
MCF7_Both_Exhausted	REACTOME_SUMOYLATION	0.269528	4	0.0212766	0.0155709	1.36643
MCF7_Both_Exhausted	REACTOME_INTRACELLULAR_SIGNALING_BY_SECOND_MESSENGERS	0.274092	7	0.037234	0.0302768	1.22979
MCF7_Both_Exhausted	REACTOME_DUAL_INCISION_IN_GG_NER	0.276593	1	0.00531915	0.00224913	2.36498
MCF7_Both_Exhausted	REACTOME_RESOLUTION_OF_ABASIC_SITES_AP_SITES_	0.276593	1	0.00531915	0.00224913	2.36498
MCF7_Both_Exhausted	REACTOME_RESPONSE_OF_MTB_TO_PHAGOCYTOSIS	0.276593	1	0.00531915	0.00224913	2.36498
MCF7_Both_Exhausted	REACTOME_RNA_POLYMERASE_III_TRANSCRIPTION_INITIATION_FROM_TYPE_3_PROMOTER	0.276593	1	0.00531915	0.00224913	2.36498
MCF7_Both_Exhausted	HALLMARK_OXIDATIVE_PHOSPHORYLATION	0.276797	4	0.0212766	0.015917	1.33673
MCF7_Both_Exhausted	HALLMARK_PROTEIN_SECRETION	0.276841	2	0.0106383	0.00657439	1.61814
MCF7_Both_Exhausted	REACTOME_SIGNALING_BY_FGFR2	0.284598	2	0.0106383	0.0067474	1.57665
MCF7_Both_Exhausted	REACTOME_SPHINGOLIPID_METABOLISM	0.284598	2	0.0106383	0.0067474	1.57665
MCF7_Both_Exhausted	REACTOME_HSF1_ACTIVATION	0.284615	1	0.00531915	0.00242215	2.19605
MCF7_Both_Exhausted	REACTOME_INSULIN_RECEPTOR_RECYCLING	0.284615	1	0.00531915	0.00242215	2.19605
MCF7_Both_Exhausted	REACTOME_KERATAN_SULFATE_KERATIN_METABOLISM	0.284615	1	0.00531915	0.00242215	2.19605
MCF7_Both_Exhausted	REACTOME_REGULATION_OF_RUNX1_EXPRESSION_AND_ACTIVITY	0.284615	1	0.00531915	0.00242215	2.19605
MCF7_Both_Exhausted	REACTOME_RNA_POLYMERASE_I_TRANSCRIPTION_TERMINATION	0.284615	1	0.00531915	0.00242215	2.19605
MCF7_Both_Exhausted	REACTOME_RNA_POLYMERASE_III_TRANSCRIPTION_INITIATION_FROM_TYPE_1_PROMOTER	0.284615	1	0.00531915	0.00242215	2.19605
MCF7_Both_Exhausted	REACTOME_SEALING_OF_THE_NUCLEAR_ENVELOPE_NE_BY_ESCRT_III	0.284615	1	0.00531915	0.00242215	2.19605
MCF7_Both_Exhausted	REACTOME_CONSTITUTIVE_SIGNALING_BY_AKT1_E17K_IN_CANCER	0.29555	1	0.00531915	0.00259516	2.04965
MCF7_Both_Exhausted	REACTOME_FATTY_ACYL_COA_BIOSYNTHESIS	0.29555	1	0.00531915	0.00259516	2.04965
MCF7_Both_Exhausted	REACTOME_MEIOTIC_SYNAPSIS	0.29555	1	0.00531915	0.00259516	2.04965
MCF7_Both_Exhausted	REACTOME_PROCESSING_OF_CAPPED_INTRONLESS_PRE_MRNA	0.29555	1	0.00531915	0.00259516	2.04965
MCF7_Both_Exhausted	REACTOME_RNA_POLYMERASE_I_PROMOTER_ESCAPE	0.29555	1	0.00531915	0.00259516	2.04965
MCF7_Both_Exhausted	REACTOME_THE_PHOTOTRANSDUCTION_CASCADE	0.29555	1	0.00531915	0.00259516	2.04965
MCF7_Both_Exhausted	REACTOME_METABOLISM_OF_NUCLEOTIDES	0.29999	2	0.0106383	0.00726644	1.46403
MCF7_Both_Exhausted	REACTOME_METABOLISM_OF_STEROIDS	0.29999	3	0.0159574	0.0121107	1.31763
MCF7_Both_Exhausted	REACTOME_BASE_EXCISION_REPAIR	0.306449	1	0.00531915	0.00276817	1.92154
MCF7_Both_Exhausted	REACTOME_INFECTION_WITH_MYCOBACTERIUM_TUBERCULOSIS	0.306449	1	0.00531915	0.00276817	1.92154
MCF7_Both_Exhausted	REACTOME_KINESINS	0.306449	1	0.00531915	0.00276817	1.92154
MCF7_Both_Exhausted	REACTOME_SYNTHESIS_OF_ACTIVE_UBIQUITIN_ROLES_OF_E1_AND_E2_ENZYMES	0.316593	1	0.00531915	0.00294118	1.80851
MCF7_Both_Exhausted	REACTOME_TRANSCRIPTIONAL_REGULATION_OF_GRANULOPOIESIS	0.316593	1	0.00531915	0.00294118	1.80851
MCF7_Both_Exhausted	REACTOME_TRANSFERRIN_ENDOCYTOSIS_AND_RECYCLING	0.316593	1	0.00531915	0.00294118	1.80851
MCF7_Both_Exhausted	REACTOME_TRANSPORT_OF_VITAMINS_NUCLEOSIDES_AND_RELATED_MOLECULES	0.316593	1	0.00531915	0.00294118	1.80851
MCF7_Both_Exhausted	REACTOME_VEGFR2_MEDIATED_VASCULAR_PERMEABILITY	0.316593	1	0.00531915	0.00294118	1.80851
MCF7_Both_Exhausted	HALLMARK_SPERMATOGENESIS	0.325067	2	0.0106383	0.00795848	1.33673
MCF7_Both_Exhausted	REACTOME_INTERLEUKIN_4_AND_INTERLEUKIN_13_SIGNALING	0.325067	2	0.0106383	0.00795848	1.33673
MCF7_Both_Exhausted	HALLMARK_NOTCH_SIGNALING	0.325189	1	0.00531915	0.00311419	1.70804
MCF7_Both_Exhausted	REACTOME_B_WICH_COMPLEX_POSITIVELY_REGULATES_RRNA_EXPRESSION	0.325189	1	0.00531915	0.00311419	1.70804
MCF7_Both_Exhausted	REACTOME_OVARIAN_TUMOR_DOMAIN_PROTEASES	0.325189	1	0.00531915	0.00311419	1.70804
MCF7_Both_Exhausted	REACTOME_TP53_REGULATES_TRANSCRIPTION_OF_CELL_DEATH_GENES	0.325189	1	0.00531915	0.00311419	1.70804
MCF7_Both_Exhausted	REACTOME_INTERFERON_SIGNALING	0.332493	3	0.0159574	0.0133218	1.19784
MCF7_Both_Exhausted	REACTOME_SIGNALING_BY_FGFR	0.335633	2	0.0106383	0.0083045	1.28103
MCF7_Both_Exhausted	REACTOME_INTRAFLAGELLAR_TRANSPORT	0.335633	1	0.00531915	0.0032872	1.61814
MCF7_Both_Exhausted	HALLMARK_ANDROGEN_RESPONSE	0.341955	2	0.0106383	0.00847751	1.25488
MCF7_Both_Exhausted	REACTOME_CD28_CO_STIMULATION	0.345502	1	0.00531915	0.00346021	1.53723
MCF7_Both_Exhausted	REACTOME_DEACTIVATION_OF_THE_BETA_CATENIN_TRANSACTIVATING_COMPLEX	0.345502	1	0.00531915	0.00346021	1.53723
MCF7_Both_Exhausted	Mutated_metUp_Single	0.355366	11	0.0585106	0.0565744	1.03422
MCF7_Both_Exhausted	REACTOME_ROS_AND_RNS_PRODUCTION_IN_PHAGOCYTES	0.355712	1	0.00531915	0.00363322	1.46403
MCF7_Both_Exhausted	REACTOME_METABOLISM_OF_CARBOHYDRATES	0.358213	5	0.0265957	0.0249135	1.06752
MCF7_Both_Exhausted	REACTOME_N_GLYCAN_TRIMMING_IN_THE_ER_AND_CALNEXIN_CALRETICULIN_CYCLE	0.365435	1	0.00531915	0.00380623	1.39749
MCF7_Both_Exhausted	REACTOME_SIGNALING_BY_NUCLEAR_RECEPTORS	0.369923	4	0.0212766	0.0200692	1.06016
MCF7_Both_Exhausted	REACTOME_MEMBRANE_TRAFFICKING	0.371344	10	0.0531915	0.0524221	1.01468
MCF7_Both_Exhausted	REACTOME_NEGATIVE_EPIGENETIC_REGULATION_OF_RRNA_EXPRESSION	0.37284	1	0.00531915	0.00397924	1.33673
MCF7_Both_Exhausted	REACTOME_RNA_POLYMERASE_III_TRANSCRIPTION	0.37284	1	0.00531915	0.00397924	1.33673
MCF7_Both_Exhausted	REACTOME_COMPLEX_I_BIOGENESIS	0.382552	1	0.00531915	0.00415225	1.28103
MCF7_Both_Exhausted	HALLMARK_PI3K_AKT_MTOR_SIGNALING	0.388444	2	0.0106383	0.00986159	1.07876
MCF7_Both_Exhausted	REACTOME_CARGO_TRAFFICKING_TO_THE_PERICILIARY_MEMBRANE	0.389004	1	0.00531915	0.00432526	1.22979
MCF7_Both_Exhausted	REACTOME_RNA_POLYMERASE_I_TRANSCRIPTION_INITIATION	0.389004	1	0.00531915	0.00432526	1.22979
MCF7_Both_Exhausted	REACTOME_RUNX1_INTERACTS_WITH_CO_FACTORS_WHOSE_PRECISE_EFFECT_ON_RUNX1_TARGETS_IS_NOT_KNOWN	0.389004	1	0.00531915	0.00432526	1.22979
MCF7_Both_Exhausted	REACTOME_NEUTROPHIL_DEGRANULATION	0.392296	7	0.037234	0.0377163	0.987215
MCF7_Both_Exhausted	REACTOME_VESICLE_MEDIATED_TRANSPORT	0.395003	10	0.0531915	0.0543253	0.97913
MCF7_Both_Exhausted	REACTOME_CYTOSOLIC_SENSORS_OF_PATHOGEN_ASSOCIATED_DNA_	0.395003	1	0.00531915	0.00449827	1.18249
MCF7_Both_Exhausted	REACTOME_NUCLEOTIDE_BINDING_DOMAIN_LEUCINE_RICH_REPEAT_CONTAINING_RECEPTOR_NLR_SIGNALING_PATHWAYS	0.395003	1	0.00531915	0.00449827	1.18249
MCF7_Both_Exhausted	REACTOME_POSITIVE_EPIGENETIC_REGULATION_OF_RRNA_EXPRESSION	0.4025	1	0.00531915	0.00467128	1.13869
MCF7_Both_Exhausted	REACTOME_RNA_POLYMERASE_I_TRANSCRIPTION	0.4025	1	0.00531915	0.00467128	1.13869
MCF7_Both_Exhausted	Mutated_metUp_Multiple	0.408643	1	0.00531915	0.00484429	1.09802
MCF7_Both_Exhausted	REACTOME_DEADENYLATION_DEPENDENT_MRNA_DECAY	0.408643	1	0.00531915	0.00484429	1.09802
MCF7_Both_Exhausted	REACTOME_SYNTHESIS_OF_SUBSTRATES_IN_N_GLYCAN_BIOSYTHESIS	0.408643	1	0.00531915	0.00484429	1.09802
MCF7_Both_Exhausted	HALLMARK_GLYCOLYSIS	0.420499	3	0.0159574	0.016955	0.941164
MCF7_Both_Exhausted	HALLMARK_FATTY_ACID_METABOLISM	0.423933	2	0.0106383	0.0112457	0.94599
MCF7_Both_Exhausted	REACTOME_COSTIMULATION_BY_THE_CD28_FAMILY	0.428877	1	0.00531915	0.00536332	0.991764
MCF7_Both_Exhausted	REACTOME_IRON_UPTAKE_AND_TRANSPORT	0.428877	1	0.00531915	0.00536332	0.991764
MCF7_Both_Exhausted	REACTOME_PRE_NOTCH_EXPRESSION_AND_PROCESSING	0.428877	1	0.00531915	0.00536332	0.991764
MCF7_Both_Exhausted	REACTOME_INNATE_IMMUNE_SYSTEM	0.431516	13	0.0691489	0.0742215	0.931657
MCF7_Both_Exhausted	REACTOME_BIOSYNTHESIS_OF_THE_N_GLYCAN_PRECURSOR_DOLICHOL_LIPID_LINKED_OLIGOSACCHARIDE_LLO_AND_TRANSFER_TO_A_NASCENT_PROTEIN	0.442165	1	0.00531915	0.00570934	0.931657
MCF7_Both_Exhausted	HALLMARK_APOPTOSIS	0.444622	2	0.0106383	0.0121107	0.878419
MCF7_Both_Exhausted	REACTOME_EXTRA_NUCLEAR_ESTROGEN_SIGNALING	0.447345	1	0.00531915	0.00588235	0.904255
MCF7_Both_Exhausted	HALLMARK_UV_RESPONSE_UP	0.452489	2	0.0106383	0.0124567	0.854019
MCF7_Both_Exhausted	HALLMARK_CHOLESTEROL_HOMEOSTASIS	0.465521	1	0.00531915	0.00640138	0.830937
MCF7_Both_Exhausted	REACTOME_SIGNALING_BY_INSULIN_RECEPTOR	0.470744	1	0.00531915	0.00657439	0.809071
MCF7_Both_Exhausted	Mutated_Any_Multiple	0.472493	4	0.0212766	0.0257785	0.825361
MCF7_Both_Exhausted	REACTOME_CIRCADIAN_CLOCK	0.474639	1	0.00531915	0.0067474	0.788325
MCF7_Both_Exhausted	REACTOME_TRANSPORT_OF_SMALL_MOLECULES	0.480166	9	0.0478723	0.0560554	0.854019
MCF7_Both_Exhausted	REACTOME_VISUAL_PHOTOTRANSDUCTION	0.483955	1	0.00531915	0.00709343	0.74987
MCF7_Both_Exhausted	Mutated_Any_Single	0.489395	25	0.132979	0.148097	0.897917
MCF7_Both_Exhausted	REACTOME_EPIGENETIC_REGULATION_OF_GENE_EXPRESSION	0.496413	1	0.00531915	0.00761246	0.698743
MCF7_Both_Exhausted	REACTOME_RESPIRATORY_ELECTRON_TRANSPORT	0.496413	1	0.00531915	0.00761246	0.698743
MCF7_Both_Exhausted	HALLMARK_HEME_METABOLISM	0.496755	2	0.0106383	0.0147059	0.723404
MCF7_Both_Exhausted	REACTOME_MITOCHONDRIAL_BIOGENESIS	0.497921	1	0.00531915	0.00778547	0.683215
MCF7_Both_Exhausted	REACTOME_RESPIRATORY_ELECTRON_TRANSPORT_ATP_SYNTHESIS_BY_CHEMIOSMOTIC_COUPLING_AND_HEAT_PRODUCTION_BY_UNCOUPLING_PROTEINS_	0.497921	1	0.00531915	0.00778547	0.683215
MCF7_Both_Exhausted	REACTOME_METABOLISM_OF_LIPIDS	0.499592	9	0.0478723	0.0584775	0.818645
MCF7_Both_Exhausted	HALLMARK_ADIPOGENESIS	0.509455	2	0.0106383	0.0155709	0.683215
MCF7_Both_Exhausted	REACTOME_PI_METABOLISM	0.516544	1	0.00531915	0.00865052	0.614894
MCF7_Both_Exhausted	HALLMARK_BILE_ACID_METABOLISM	0.530493	1	0.00531915	0.00934256	0.569346
MCF7_Both_Exhausted	REACTOME_FACTORS_INVOLVED_IN_MEGAKARYOCYTE_DEVELOPMENT_AND_PLATELET_PRODUCTION	0.531578	1	0.00531915	0.00951557	0.558994
MCF7_Both_Exhausted	REACTOME_PI3K_AKT_SIGNALING_IN_CANCER	0.531578	1	0.00531915	0.00951557	0.558994
MCF7_Both_Exhausted	HALLMARK_PEROXISOME	0.53373	1	0.00531915	0.00968858	0.549012
MCF7_Both_Exhausted	REACTOME_GLYCOSAMINOGLYCAN_METABOLISM	0.539492	1	0.00531915	0.0102076	0.521096
MCF7_Both_Exhausted	REACTOME_INTEGRATION_OF_ENERGY_METABOLISM	0.539492	1	0.00531915	0.0102076	0.521096
MCF7_Both_Exhausted	REACTOME_SIGNALING_BY_VEGF	0.539492	1	0.00531915	0.0102076	0.521096
MCF7_Both_Exhausted	REACTOME_DISEASES_OF_GLYCOSYLATION	0.541195	1	0.00531915	0.0103806	0.512411
MCF7_Both_Exhausted	REACTOME_RESPONSE_TO_ELEVATED_PLATELET_CYTOSOLIC_CA2_	0.545501	1	0.00531915	0.0107266	0.495882
MCF7_Both_Exhausted	REACTOME_METABOLISM_OF_WATER_SOLUBLE_VITAMINS_AND_COFACTORS	0.54691	1	0.00531915	0.0108997	0.488011
MCF7_Both_Exhausted	HALLMARK_UV_RESPONSE_DN	0.556285	1	0.00531915	0.0117647	0.452128
MCF7_Both_Exhausted	REACTOME_THE_CITRIC_ACID_TCA_CYCLE_AND_RESPIRATORY_ELECTRON_TRANSPORT	0.556285	1	0.00531915	0.0117647	0.452128
MCF7_Both_Exhausted	HALLMARK_ALLOGRAFT_REJECTION	0.561234	1	0.00531915	0.0122837	0.433024
MCF7_Both_Exhausted	HALLMARK_KRAS_SIGNALING_DN	0.561926	1	0.00531915	0.0124567	0.427009
MCF7_Both_Exhausted	HALLMARK_INTERFERON_GAMMA_RESPONSE	0.564343	1	0.00531915	0.0128028	0.415469
MCF7_Both_Exhausted	REACTOME_ION_CHANNEL_TRANSPORT	0.57267	1	0.00531915	0.0138408	0.384309
MCF7_Both_Exhausted	REACTOME_FATTY_ACID_METABOLISM	0.573039	1	0.00531915	0.0141869	0.374935
MCF7_Both_Exhausted	HALLMARK_TNFA_SIGNALING_VIA_NFKB	0.573039	1	0.00531915	0.0143599	0.370418
MCF7_Both_Exhausted	HALLMARK_XENOBIOTIC_METABOLISM	0.573039	1	0.00531915	0.0143599	0.370418
MCF7_Both_Exhausted	HALLMARK_ESTROGEN_RESPONSE_LATE	0.581519	1	0.00531915	0.01609	0.330588
MCF7_Both_Exhausted	REACTOME_METABOLISM_OF_VITAMINS_AND_COFACTORS	0.581519	1	0.00531915	0.01609	0.330588
MCF7_Both_Exhausted	HALLMARK_ESTROGEN_RESPONSE_EARLY	0.582772	1	0.00531915	0.016609	0.320257
MCF7_Both_Exhausted	REACTOME_SIGNALING_BY_RECEPTOR_TYROSINE_KINASES	0.582772	4	0.0212766	0.0422145	0.504011
MCF7_Both_Exhausted	REACTOME_PHOSPHOLIPID_METABOLISM	0.585385	1	0.00531915	0.0183391	0.290044
MCF7_Both_Exhausted	REACTOME_SLC_MEDIATED_TRANSMEMBRANE_TRANSPORT	0.585385	1	0.00531915	0.0185121	0.287333
MCF7_Both_Exhausted	REACTOME_DISEASES_OF_METABOLISM	0.585385	1	0.00531915	0.0186851	0.284673
MCF7_Both_Exhausted	HALLMARK_P53_PATHWAY	0.585385	1	0.00531915	0.0188581	0.282061
MCF7_Both_Exhausted	REACTOME_LEISHMANIA_INFECTION	0.586135	1	0.00531915	0.0195502	0.272077
MCF7_Both_Exhausted	REACTOME_PLATELET_ACTIVATION_SIGNALING_AND_AGGREGATION	0.59036	1	0.00531915	0.0221453	0.240193
MCF7_Both_Exhausted	REACTOME_G_ALPHA_I_SIGNALLING_EVENTS	0.593323	1	0.00531915	0.0257785	0.20634
MCF7_Both_Exhausted	REACTOME_HEMOSTASIS	0.59362	2	0.0106383	0.0442907	0.240193
MCF7_Both_Exhausted	REACTOME_SIGNALING_BY_GPCR	0.59362	1	0.00531915	0.0570934	0.0931657
MCF7_Both_Exhausted	LTED_Expanded	0.59362	1	0.00531915	0.0624567	0.0851653
MCF7_+E2_only_Exhausted	MCF7_+E2_Exhausted	0	302	1	0.082699	12.0921
MCF7_+E2_only_Exhausted	LTED_Exhausted	7.12821e-122	211	0.698675	0.131315	5.32061
MCF7_+E2_only_Exhausted	Essential_Genes	9.52926e-47	201	0.665563	0.271453	2.45185
MCF7_+E2_only_Exhausted	REACTOME_TRANSLATION	1.67131e-19	41	0.135762	0.0231834	5.85598
MCF7_+E2_only_Exhausted	REACTOME_MITOCHONDRIAL_TRANSLATION	6.28368e-19	26	0.0860927	0.00865052	9.95232
MCF7_+E2_only_Exhausted	REACTOME_METABOLISM_OF_RNA	4.70831e-08	45	0.149007	0.0557093	2.67472
MCF7_+E2_only_Exhausted	HALLMARK_OXIDATIVE_PHOSPHORYLATION	4.1409e-07	21	0.0695364	0.015917	4.3687
MCF7_+E2_only_Exhausted	REACTOME_RRNA_PROCESSING	5.14165e-06	19	0.0629139	0.0152249	4.1323
MCF7_+E2_only_Exhausted	REACTOME_TRNA_PROCESSING_IN_THE_NUCLEUS	0.000108717	10	0.0331126	0.00536332	6.17389
MCF7_+E2_only_Exhausted	REACTOME_INFLUENZA_INFECTION	0.000108717	15	0.0496689	0.0121107	4.10123
MCF7_+E2_only_Exhausted	REACTOME_CELL_CYCLE	0.000116797	34	0.112583	0.0484429	2.32403
MCF7_+E2_only_Exhausted	HALLMARK_MYC_TARGETS_V1	0.000226482	18	0.0596026	0.0179931	3.31253
MCF7_+E2_only_Exhausted	REACTOME_CELL_CYCLE_MITOTIC	0.000226482	29	0.0960265	0.0394464	2.43436
MCF7_+E2_only_Exhausted	REACTOME_RESPIRATORY_ELECTRON_TRANSPORT	0.000378384	11	0.0364238	0.00761246	4.78477
MCF7_+E2_only_Exhausted	REACTOME_RESPIRATORY_ELECTRON_TRANSPORT_ATP_SYNTHESIS_BY_CHEMIOSMOTIC_COUPLING_AND_HEAT_PRODUCTION_BY_UNCOUPLING_PROTEINS_	0.000445961	11	0.0364238	0.00778547	4.67844
MCF7_+E2_only_Exhausted	REACTOME_THE_CITRIC_ACID_TCA_CYCLE_AND_RESPIRATORY_ELECTRON_TRANSPORT	0.00117996	13	0.0430464	0.0117647	3.65894
MCF7_+E2_only_Exhausted	REACTOME_EXPORT_OF_VIRAL_RIBONUCLEOPROTEINS_FROM_NUCLEUS	0.00117996	6	0.0198675	0.00242215	8.20246
MCF7_+E2_only_Exhausted	REACTOME_TRNA_PROCESSING	0.00159223	11	0.0364238	0.00899654	4.04865
MCF7_+E2_only_Exhausted	HALLMARK_G2M_CHECKPOINT	0.00160151	15	0.0496689	0.0157439	3.15479
MCF7_+E2_only_Exhausted	REACTOME_REGULATION_OF_HSF1_MEDIATED_HEAT_SHOCK_RESPONSE	0.00170857	9	0.0298013	0.00622837	4.78477
MCF7_+E2_only_Exhausted	REACTOME_SNRNP_ASSEMBLY	0.00194348	8	0.0264901	0.0050173	5.27974
MCF7_+E2_only_Exhausted	REACTOME_SUMOYLATION_OF_DNA_REPLICATION_PROTEINS	0.00263584	7	0.0231788	0.00397924	5.82494
MCF7_+E2_only_Exhausted	REACTOME_INTERACTIONS_OF_REV_WITH_HOST_CELLULAR_PROTEINS	0.00314428	6	0.0198675	0.00294118	6.75497
MCF7_+E2_only_Exhausted	REACTOME_M_PHASE	0.00317725	21	0.0695364	0.0290657	2.39238
MCF7_+E2_only_Exhausted	REACTOME_SUMOYLATION_OF_DNA_DAMAGE_RESPONSE_AND_REPAIR_PROTEINS	0.00399061	9	0.0298013	0.00709343	4.20126
MCF7_+E2_only_Exhausted	REACTOME_TRANSPORT_OF_MATURE_MRNAS_DERIVED_FROM_INTRONLESS_TRANSCRIPTS	0.00399061	6	0.0198675	0.00311419	6.37969
MCF7_+E2_only_Exhausted	REACTOME_MITOTIC_G2_G2_M_PHASES	0.00422983	14	0.0463576	0.0157439	2.94447
MCF7_+E2_only_Exhausted	REACTOME_NS1_MEDIATED_EFFECTS_ON_HOST_PATHWAYS	0.0051803	6	0.0198675	0.0032872	6.04392
MCF7_+E2_only_Exhausted	REACTOME_POSTMITOTIC_NUCLEAR_PORE_COMPLEX_NPC_REFORMATION	0.00562494	5	0.0165563	0.00224913	7.36118
MCF7_+E2_only_Exhausted	REACTOME_REGULATION_OF_GLUCOKINASE_BY_GLUCOKINASE_REGULATORY_PROTEIN	0.00562494	5	0.0165563	0.00224913	7.36118
MCF7_+E2_only_Exhausted	REACTOME_VIRAL_MESSENGER_RNA_SYNTHESIS	0.00639384	6	0.0198675	0.00346021	5.74172
MCF7_+E2_only_Exhausted	REACTOME_NUCLEAR_IMPORT_OF_REV_PROTEIN	0.0077157	5	0.0165563	0.00242215	6.83538
MCF7_+E2_only_Exhausted	HALLMARK_E2F_TARGETS	0.0077157	13	0.0430464	0.0150519	2.85986
MCF7_+E2_only_Exhausted	REACTOME_EUKARYOTIC_TRANSLATION_INITIATION	0.00788454	10	0.0331126	0.00968858	3.41769
MCF7_+E2_only_Exhausted	REACTOME_MITOCHONDRIAL_PROTEIN_IMPORT	0.00804345	7	0.0231788	0.0050173	4.61978
MCF7_+E2_only_Exhausted	REACTOME_CELLULAR_RESPONSE_TO_HEAT_STRESS	0.00826776	9	0.0298013	0.00813149	3.66493
MCF7_+E2_only_Exhausted	HALLMARK_MYC_TARGETS_V2	0.00948707	7	0.0231788	0.00519031	4.46578
MCF7_+E2_only_Exhausted	REACTOME_ACTIVATION_OF_ATR_IN_RESPONSE_TO_REPLICATION_STRESS	0.00950114	5	0.0165563	0.00259516	6.37969
MCF7_+E2_only_Exhausted	REACTOME_RRNA_MODIFICATION_IN_THE_NUCLEUS_AND_CYTOSOL	0.0112982	6	0.0198675	0.00397924	4.9928
MCF7_+E2_only_Exhausted	REACTOME_TRANSCRIPTIONAL_REGULATION_BY_SMALL_RNAS	0.0112982	6	0.0198675	0.00397924	4.9928
MCF7_+E2_only_Exhausted	REACTOME_INTERACTIONS_OF_VPR_WITH_HOST_CELLULAR_PROTEINS	0.0116957	5	0.0165563	0.00276817	5.98096
MCF7_+E2_only_Exhausted	REACTOME_SUMOYLATION_OF_UBIQUITINYLATION_PROTEINS	0.0116957	5	0.0165563	0.00276817	5.98096
MCF7_+E2_only_Exhausted	REACTOME_TRANSPORT_OF_THE_SLBP_DEPENDANT_MATURE_MRNA	0.0116957	5	0.0165563	0.00276817	5.98096
MCF7_+E2_only_Exhausted	REACTOME_SRP_DEPENDENT_COTRANSLATIONAL_PROTEIN_TARGETING_TO_MEMBRANE	0.0125647	9	0.0298013	0.00882353	3.37748
MCF7_+E2_only_Exhausted	REACTOME_COMPLEX_I_BIOGENESIS	0.0128109	6	0.0198675	0.00415225	4.78477
MCF7_+E2_only_Exhausted	REACTOME_MITOTIC_PROMETAPHASE	0.0129579	13	0.0430464	0.016436	2.61903
MCF7_+E2_only_Exhausted	REACTOME_MITOTIC_PROPHASE	0.0131857	8	0.0264901	0.00726644	3.64554
MCF7_+E2_only_Exhausted	REACTOME_NUCLEAR_PORE_COMPLEX_NPC_DISASSEMBLY	0.0139251	5	0.0165563	0.00294118	5.62914
MCF7_+E2_only_Exhausted	REACTOME_SUMOYLATION_OF_SUMOYLATION_PROTEINS	0.0139251	5	0.0165563	0.00294118	5.62914
MCF7_+E2_only_Exhausted	REACTOME_GLYCOLYSIS	0.0154972	7	0.0231788	0.00588235	3.9404
MCF7_+E2_only_Exhausted	REACTOME_TP53_REGULATES_TRANSCRIPTION_OF_DNA_REPAIR_GENES	0.0177001	6	0.0198675	0.00449827	4.41671
MCF7_+E2_only_Exhausted	REACTOME_NUCLEAR_ENVELOPE_NE_REASSEMBLY	0.017809	7	0.0231788	0.00605536	3.82781
MCF7_+E2_only_Exhausted	REACTOME_DNA_REPAIR	0.0189619	15	0.0496689	0.0216263	2.29669
MCF7_+E2_only_Exhausted	REACTOME_NUCLEAR_ENVELOPE_BREAKDOWN	0.0205655	6	0.0198675	0.00467128	4.25313
MCF7_+E2_only_Exhausted	REACTOME_RECRUITMENT_OF_NUMA_TO_MITOTIC_CENTROSOMES	0.0207701	8	0.0264901	0.00795848	3.32853
MCF7_+E2_only_Exhausted	REACTOME_ANTIVIRAL_MECHANISM_BY_IFN_STIMULATED_GENES	0.0227413	7	0.0231788	0.00640138	3.62091
MCF7_+E2_only_Exhausted	REACTOME_TRANSPORT_OF_MATURE_TRANSCRIPT_TO_CYTOPLASM	0.0227413	7	0.0231788	0.00640138	3.62091
MCF7_+E2_only_Exhausted	REACTOME_HCMV_EARLY_EVENTS	0.0233186	6	0.0198675	0.00484429	4.10123
MCF7_+E2_only_Exhausted	REACTOME_NONSENSE_MEDIATED_DECAY_NMD_	0.0255727	8	0.0264901	0.0083045	3.18985
MCF7_+E2_only_Exhausted	REACTOME_PROCESSING_OF_CAPPED_INTRON_CONTAINING_PRE_MRNA	0.0260222	14	0.0463576	0.0204152	2.27074
MCF7_+E2_only_Exhausted	REACTOME_HIV_LIFE_CYCLE	0.0284801	10	0.0331126	0.0122837	2.69564
MCF7_+E2_only_Exhausted	REACTOME_FORMATION_OF_RNA_POL_II_ELONGATION_COMPLEX_	0.031485	6	0.0198675	0.00519031	3.82781
MCF7_+E2_only_Exhausted	REACTOME_EUKARYOTIC_TRANSLATION_ELONGATION	0.03258	7	0.0231788	0.00692042	3.34934
MCF7_+E2_only_Exhausted	REACTOME_REGULATION_OF_PLK1_ACTIVITY_AT_G2_M_TRANSITION	0.0369847	7	0.0231788	0.00709343	3.26765
MCF7_+E2_only_Exhausted	REACTOME_RECRUITMENT_OF_MITOTIC_CENTROSOME_PROTEINS_AND_COMPLEXES	0.041792	7	0.0231788	0.00726644	3.18985
MCF7_+E2_only_Exhausted	REACTOME_SUMOYLATION	0.0509548	11	0.0364238	0.0155709	2.33922
MCF7_+E2_only_Exhausted	REACTOME_FORMATION_OF_TC_NER_PRE_INCISION_COMPLEX	0.0517765	5	0.0165563	0.00415225	3.98731
MCF7_+E2_only_Exhausted	REACTOME_GLUCOSE_METABOLISM	0.0519054	7	0.0231788	0.00761246	3.04485
MCF7_+E2_only_Exhausted	REACTOME_MITOCHONDRIAL_BIOGENESIS	0.057112	7	0.0231788	0.00778547	2.97719
MCF7_+E2_only_Exhausted	REACTOME_SELENOAMINO_ACID_METABOLISM	0.057112	7	0.0231788	0.00778547	2.97719
MCF7_+E2_only_Exhausted	REACTOME_AURKA_ACTIVATION_BY_TPX2	0.0683811	6	0.0198675	0.00622837	3.18985
MCF7_+E2_only_Exhausted	REACTOME_GENE_SILENCING_BY_RNA	0.0683811	6	0.0198675	0.00622837	3.18985
MCF7_+E2_only_Exhausted	HALLMARK_UNFOLDED_PROTEIN_RESPONSE	0.0729963	8	0.0264901	0.0102076	2.59513
MCF7_+E2_only_Exhausted	REACTOME_MITOTIC_METAPHASE_AND_ANAPHASE	0.0729963	12	0.0397351	0.0188581	2.10705
MCF7_+E2_only_Exhausted	REACTOME_RESPONSE_OF_EIF2AK4_GCN2_TO_AMINO_ACID_DEFICIENCY	0.0756981	7	0.0231788	0.0083045	2.79111
MCF7_+E2_only_Exhausted	REACTOME_SUMOYLATION_OF_RNA_BINDING_PROTEINS	0.0762768	5	0.0165563	0.00467128	3.54427
MCF7_+E2_only_Exhausted	REACTOME_ACTIVATION_OF_THE_PRE_REPLICATIVE_COMPLEX	0.0803175	3	0.00993377	0.0017301	5.74172
MCF7_+E2_only_Exhausted	REACTOME_CYCLIN_A_B1_B2_ASSOCIATED_EVENTS_DURING_G2_M_TRANSITION	0.0803175	3	0.00993377	0.0017301	5.74172
MCF7_+E2_only_Exhausted	REACTOME_MITOCHONDRIAL_IRON_SULFUR_CLUSTER_BIOGENESIS	0.0803175	3	0.00993377	0.0017301	5.74172
MCF7_+E2_only_Exhausted	REACTOME_SUMOYLATION_OF_CHROMATIN_ORGANIZATION_PROTEINS	0.0845405	5	0.0165563	0.00484429	3.41769
MCF7_+E2_only_Exhausted	REACTOME_HIV_TRANSCRIPTION_ELONGATION	0.0923283	4	0.013245	0.0032872	4.02928
MCF7_+E2_only_Exhausted	REACTOME_REGULATION_OF_EXPRESSION_OF_SLITS_AND_ROBOS	0.0931021	9	0.0298013	0.0129758	2.29669
MCF7_+E2_only_Exhausted	REACTOME_HCMV_LATE_EVENTS	0.0943648	5	0.0165563	0.0050173	3.29984
MCF7_+E2_only_Exhausted	REACTOME_TRANSCRIPTIONAL_REGULATION_OF_WHITE_ADIPOCYTE_DIFFERENTIATION	0.0963179	6	0.0198675	0.00692042	2.87086
MCF7_+E2_only_Exhausted	HALLMARK_MTORC1_SIGNALING	0.0963179	11	0.0364238	0.0176471	2.06402
MCF7_+E2_only_Exhausted	REACTOME_SIGNALING_BY_ROBO_RECEPTORS	0.0963179	11	0.0364238	0.0176471	2.06402
MCF7_+E2_only_Exhausted	REACTOME_CELL_CYCLE_CHECKPOINTS	0.0985733	12	0.0397351	0.0200692	1.9799
MCF7_+E2_only_Exhausted	REACTOME_DNA_REPLICATION	0.108258	7	0.0231788	0.00916955	2.5278
MCF7_+E2_only_Exhausted	REACTOME_ORGANELLE_BIOGENESIS_AND_MAINTENANCE	0.109829	13	0.0430464	0.0228374	1.88491
MCF7_+E2_only_Exhausted	REACTOME_TRANSCRIPTIONAL_ACTIVATION_OF_MITOCHONDRIAL_BIOGENESIS	0.114391	5	0.0165563	0.00536332	3.08695
MCF7_+E2_only_Exhausted	REACTOME_NUCLEOTIDE_EXCISION_REPAIR	0.11509	7	0.0231788	0.00934256	2.48099
MCF7_+E2_only_Exhausted	REACTOME_HOMOLOGOUS_DNA_PAIRING_AND_STRAND_EXCHANGE	0.117003	3	0.00993377	0.00207612	4.78477
MCF7_+E2_only_Exhausted	REACTOME_CELLULAR_RESPONSES_TO_EXTERNAL_STIMULI	0.121338	21	0.0695364	0.0437716	1.58862
MCF7_+E2_only_Exhausted	REACTOME_REGULATION_OF_LIPID_METABOLISM_BY_PPARALPHA	0.122161	7	0.0231788	0.00951557	2.43588
MCF7_+E2_only_Exhausted	REACTOME_TRANSCRIPTION_COUPLED_NUCLEOTIDE_EXCISION_REPAIR_TC_NER_	0.12312	5	0.0165563	0.00553633	2.99048
MCF7_+E2_only_Exhausted	REACTOME_PROTEIN_LOCALIZATION	0.125961	9	0.0298013	0.0140138	2.12656
MCF7_+E2_only_Exhausted	REACTOME_HCMV_INFECTION	0.129938	6	0.0198675	0.00761246	2.60987
MCF7_+E2_only_Exhausted	REACTOME_MITOTIC_G1_PHASE_AND_G1_S_TRANSITION	0.154467	8	0.0264901	0.0122837	2.15652
MCF7_+E2_only_Exhausted	REACTOME_HIV_INFECTION	0.155867	11	0.0364238	0.0193772	1.87973
MCF7_+E2_only_Exhausted	REACTOME_S_PHASE	0.160075	8	0.0264901	0.0124567	2.12656
MCF7_+E2_only_Exhausted	REACTOME_MRNA_CAPPING	0.160075	3	0.00993377	0.00242215	4.10123
MCF7_+E2_only_Exhausted	REACTOME_RNA_POLYMERASE_I_TRANSCRIPTION_TERMINATION	0.160075	3	0.00993377	0.00242215	4.10123
MCF7_+E2_only_Exhausted	REACTOME_RNA_POLYMERASE_III_TRANSCRIPTION_INITIATION_FROM_TYPE_1_PROMOTER	0.160075	3	0.00993377	0.00242215	4.10123
MCF7_+E2_only_Exhausted	REACTOME_IRF3_MEDIATED_INDUCTION_OF_TYPE_I_IFN	0.164935	2	0.00662252	0.00103806	6.37969
MCF7_+E2_only_Exhausted	REACTOME_MITOCHONDRIAL_TRNA_AMINOACYLATION	0.164935	2	0.00662252	0.00103806	6.37969
MCF7_+E2_only_Exhausted	REACTOME_STING_MEDIATED_INDUCTION_OF_HOST_IMMUNE_RESPONSES	0.164935	2	0.00662252	0.00103806	6.37969
MCF7_+E2_only_Exhausted	REACTOME_RNA_POLYMERASE_I_PROMOTER_ESCAPE	0.185358	3	0.00993377	0.00259516	3.82781
MCF7_+E2_only_Exhausted	REACTOME_HOST_INTERACTIONS_OF_HIV_FACTORS	0.188189	7	0.0231788	0.0107266	2.16086
MCF7_+E2_only_Exhausted	REACTOME_CHROMOSOME_MAINTENANCE	0.188189	5	0.0165563	0.00640138	2.58636
MCF7_+E2_only_Exhausted	REACTOME_CYTOSOLIC_SENSORS_OF_PATHOGEN_ASSOCIATED_DNA_	0.195375	4	0.013245	0.00449827	2.94447
MCF7_+E2_only_Exhausted	REACTOME_DUAL_INCISION_IN_TC_NER	0.195375	4	0.013245	0.00449827	2.94447
MCF7_+E2_only_Exhausted	REACTOME_SLC_TRANSPORTER_DISORDERS	0.202247	5	0.0165563	0.00657439	2.5183
MCF7_+E2_only_Exhausted	REACTOME_FORMATION_OF_THE_EARLY_ELONGATION_COMPLEX	0.203828	3	0.00993377	0.00276817	3.58858
MCF7_+E2_only_Exhausted	REACTOME_CRISTAE_FORMATION	0.203828	2	0.00662252	0.00121107	5.46831
MCF7_+E2_only_Exhausted	REACTOME_FORMATION_OF_TUBULIN_FOLDING_INTERMEDIATES_BY_CCT_TRIC	0.203828	2	0.00662252	0.00121107	5.46831
MCF7_+E2_only_Exhausted	REACTOME_POST_CHAPERONIN_TUBULIN_FOLDING_PATHWAY	0.203828	2	0.00662252	0.00121107	5.46831
MCF7_+E2_only_Exhausted	REACTOME_APC_C_MEDIATED_DEGRADATION_OF_CELL_CYCLE_PROTEINS	0.211175	5	0.0165563	0.0067474	2.45373
MCF7_+E2_only_Exhausted	REACTOME_GLOBAL_GENOME_NUCLEOTIDE_EXCISION_REPAIR_GG_NER_	0.211175	5	0.0165563	0.0067474	2.45373
MCF7_+E2_only_Exhausted	REACTOME_PROTEIN_UBIQUITINATION	0.223699	5	0.0165563	0.00692042	2.39238
MCF7_+E2_only_Exhausted	REACTOME_REGULATION_OF_TP53_ACTIVITY_THROUGH_PHOSPHORYLATION	0.223699	5	0.0165563	0.00692042	2.39238
MCF7_+E2_only_Exhausted	REACTOME_SWITCHING_OF_ORIGINS_TO_A_POST_REPLICATIVE_STATE	0.223699	5	0.0165563	0.00692042	2.39238
MCF7_+E2_only_Exhausted	REACTOME_E3_UBIQUITIN_LIGASES_UBIQUITINATE_TARGET_PROTEINS	0.223699	4	0.013245	0.00484429	2.73415
MCF7_+E2_only_Exhausted	REACTOME_MRNA_SPLICING	0.223699	9	0.0298013	0.016263	1.83246
MCF7_+E2_only_Exhausted	REACTOME_RESOLUTION_OF_SISTER_CHROMATID_COHESION	0.24038	6	0.0198675	0.00934256	2.12656
MCF7_+E2_only_Exhausted	REACTOME_RNA_POLYMERASE_III_CHAIN_ELONGATION	0.24038	2	0.00662252	0.00138408	4.78477
MCF7_+E2_only_Exhausted	REACTOME_TRNA_AMINOACYLATION	0.24038	2	0.00662252	0.00138408	4.78477
MCF7_+E2_only_Exhausted	REACTOME_ACTIVATION_OF_THE_MRNA_UPON_BINDING_OF_THE_CAP_BINDING_COMPLEX_AND_EIFS_AND_SUBSEQUENT_BINDING_TO_43S	0.24038	4	0.013245	0.0050173	2.63987
MCF7_+E2_only_Exhausted	REACTOME_INFECTIOUS_DISEASE	0.255747	25	0.0827815	0.0605536	1.36708
MCF7_+E2_only_Exhausted	REACTOME_HDR_THROUGH_HOMOLOGOUS_RECOMBINATION_HRR_	0.281132	3	0.00993377	0.0032872	3.02196
MCF7_+E2_only_Exhausted	REACTOME_SEPARATION_OF_SISTER_CHROMATIDS	0.283278	8	0.0264901	0.0147059	1.80132
MCF7_+E2_only_Exhausted	REACTOME_G2_M_CHECKPOINTS	0.283278	6	0.0198675	0.00986159	2.01464
MCF7_+E2_only_Exhausted	REACTOME_PINK1_PRKN_MEDIATED_MITOPHAGY	0.286676	2	0.00662252	0.00155709	4.25313
MCF7_+E2_only_Exhausted	REACTOME_DNA_DAMAGE_RECOGNITION_IN_GG_NER	0.306586	3	0.00993377	0.00346021	2.87086
MCF7_+E2_only_Exhausted	REACTOME_FORMATION_OF_INCISION_COMPLEX_IN_GG_NER	0.306586	3	0.00993377	0.00346021	2.87086
MCF7_+E2_only_Exhausted	REACTOME_ANCHORING_OF_THE_BASAL_BODY_TO_THE_PLASMA_MEMBRANE	0.324222	5	0.0165563	0.00795848	2.08033
MCF7_+E2_only_Exhausted	REACTOME_CYCLIN_A_CDK2_ASSOCIATED_EVENTS_AT_S_PHASE_ENTRY	0.324222	5	0.0165563	0.00795848	2.08033
MCF7_+E2_only_Exhausted	REACTOME_ORC1_REMOVAL_FROM_CHROMATIN	0.324222	4	0.013245	0.00570934	2.31989
MCF7_+E2_only_Exhausted	REACTOME_TRANSCRIPTION_OF_THE_HIV_GENOME	0.324222	4	0.013245	0.00570934	2.31989
MCF7_+E2_only_Exhausted	REACTOME_CITRIC_ACID_CYCLE_TCA_CYCLE_	0.324222	2	0.00662252	0.0017301	3.82781
MCF7_+E2_only_Exhausted	REACTOME_COOPERATION_OF_PREFOLDIN_AND_TRIC_CCT_IN_ACTIN_AND_TUBULIN_FOLDING	0.324222	2	0.00662252	0.0017301	3.82781
MCF7_+E2_only_Exhausted	REACTOME_TELOMERE_EXTENSION_BY_TELOMERASE	0.324222	2	0.00662252	0.0017301	3.82781
MCF7_+E2_only_Exhausted	HALLMARK_MITOTIC_SPINDLE	0.335844	9	0.0298013	0.0181661	1.64049
MCF7_+E2_only_Exhausted	REACTOME_ACTIVATION_OF_GENE_EXPRESSION_BY_SREBF_SREBP_	0.357453	3	0.00993377	0.00380623	2.60987
MCF7_+E2_only_Exhausted	REACTOME_HIV_TRANSCRIPTION_INITIATION	0.357453	3	0.00993377	0.00380623	2.60987
MCF7_+E2_only_Exhausted	REACTOME_INTERFERON_SIGNALING	0.360287	7	0.0231788	0.0133218	1.73992
MCF7_+E2_only_Exhausted	REACTOME_NEGATIVE_EPIGENETIC_REGULATION_OF_RRNA_EXPRESSION	0.381855	3	0.00993377	0.00397924	2.4964
MCF7_+E2_only_Exhausted	REACTOME_NOTCH1_INTRACELLULAR_DOMAIN_REGULATES_TRANSCRIPTION	0.381855	3	0.00993377	0.00397924	2.4964
MCF7_+E2_only_Exhausted	REACTOME_PROCESSING_OF_DNA_DOUBLE_STRAND_BREAK_ENDS	0.381855	3	0.00993377	0.00397924	2.4964
MCF7_+E2_only_Exhausted	REACTOME_RNA_POLYMERASE_III_TRANSCRIPTION	0.381855	3	0.00993377	0.00397924	2.4964
MCF7_+E2_only_Exhausted	REACTOME_DNA_REPLICATION_PRE_INITIATION	0.381855	4	0.013245	0.00622837	2.12656
MCF7_+E2_only_Exhausted	REACTOME_HDR_THROUGH_SINGLE_STRAND_ANNEALING_SSA_	0.407632	2	0.00662252	0.00207612	3.18985
MCF7_+E2_only_Exhausted	REACTOME_RNA_POLYMERASE_III_TRANSCRIPTION_TERMINATION	0.407632	2	0.00662252	0.00207612	3.18985
MCF7_+E2_only_Exhausted	REACTOME_RORA_ACTIVATES_GENE_EXPRESSION	0.407632	2	0.00662252	0.00207612	3.18985
MCF7_+E2_only_Exhausted	REACTOME_TELOMERE_MAINTENANCE	0.407632	3	0.00993377	0.00415225	2.39238
MCF7_+E2_only_Exhausted	REACTOME_DNA_DOUBLE_STRAND_BREAK_REPAIR	0.419628	5	0.0165563	0.00899654	1.8403
MCF7_+E2_only_Exhausted	REACTOME_MITOTIC_SPINDLE_CHECKPOINT	0.419628	5	0.0165563	0.00899654	1.8403
MCF7_+E2_only_Exhausted	REACTOME_TRANSCRIPTIONAL_REGULATION_BY_TP53	0.419628	13	0.0430464	0.0306228	1.40569
MCF7_+E2_only_Exhausted	REACTOME_HOMOLOGY_DIRECTED_REPAIR	0.419827	4	0.013245	0.00657439	2.01464
MCF7_+E2_only_Exhausted	REACTOME_RNA_POLYMERASE_I_TRANSCRIPTION_INITIATION	0.432264	3	0.00993377	0.00432526	2.29669
MCF7_+E2_only_Exhausted	REACTOME_G0_AND_EARLY_G1	0.433958	2	0.00662252	0.00224913	2.94447
MCF7_+E2_only_Exhausted	REACTOME_MITOPHAGY	0.433958	2	0.00662252	0.00224913	2.94447
MCF7_+E2_only_Exhausted	REACTOME_PKA_ACTIVATION_IN_GLUCAGON_SIGNALLING	0.433958	2	0.00662252	0.00224913	2.94447
MCF7_+E2_only_Exhausted	REACTOME_RESPONSE_OF_MTB_TO_PHAGOCYTOSIS	0.433958	2	0.00662252	0.00224913	2.94447
MCF7_+E2_only_Exhausted	REACTOME_RNA_POLYMERASE_III_TRANSCRIPTION_INITIATION_FROM_TYPE_3_PROMOTER	0.433958	2	0.00662252	0.00224913	2.94447
MCF7_+E2_only_Exhausted	REACTOME_SYNDECAN_INTERACTIONS	0.433958	2	0.00662252	0.00224913	2.94447
MCF7_+E2_only_Exhausted	REACTOME_MRNA_SPLICING_MINOR_PATHWAY	0.451	3	0.00993377	0.00449827	2.20835
MCF7_+E2_only_Exhausted	REACTOME_RNA_POLYMERASE_II_TRANSCRIBES_SNRNA_GENES	0.454653	4	0.013245	0.00692042	1.91391
MCF7_+E2_only_Exhausted	REACTOME_FACTORS_INVOLVED_IN_MEGAKARYOCYTE_DEVELOPMENT_AND_PLATELET_PRODUCTION	0.463661	5	0.0165563	0.00951557	1.73992
MCF7_+E2_only_Exhausted	REACTOME_DEPOSITION_OF_NEW_CENPA_CONTAINING_NUCLEOSOMES_AT_THE_CENTROMERE	0.466483	2	0.00662252	0.00242215	2.73415
MCF7_+E2_only_Exhausted	REACTOME_FANCONI_ANEMIA_PATHWAY	0.466483	2	0.00662252	0.00242215	2.73415
MCF7_+E2_only_Exhausted	REACTOME_PKA_MEDIATED_PHOSPHORYLATION_OF_CREB	0.466483	2	0.00662252	0.00242215	2.73415
MCF7_+E2_only_Exhausted	REACTOME_SEALING_OF_THE_NUCLEAR_ENVELOPE_NE_BY_ESCRT_III	0.466483	2	0.00662252	0.00242215	2.73415
MCF7_+E2_only_Exhausted	REACTOME_REGULATION_OF_CHOLESTEROL_BIOSYNTHESIS_BY_SREBP_SREBF_	0.466483	3	0.00993377	0.00467128	2.12656
MCF7_+E2_only_Exhausted	REACTOME_RNA_POLYMERASE_I_TRANSCRIPTION	0.466483	3	0.00993377	0.00467128	2.12656
MCF7_+E2_only_Exhausted	REACTOME_HEDGEHOG_OFF_STATE	0.494084	5	0.0165563	0.00986159	1.67887
MCF7_+E2_only_Exhausted	REACTOME_FGFR2_ALTERNATIVE_SPLICING	0.503724	2	0.00662252	0.00259516	2.55188
MCF7_+E2_only_Exhausted	REACTOME_HIV_ELONGATION_ARREST_AND_RECOVERY	0.503724	2	0.00662252	0.00259516	2.55188
MCF7_+E2_only_Exhausted	REACTOME_MEIOTIC_SYNAPSIS	0.503724	2	0.00662252	0.00259516	2.55188
MCF7_+E2_only_Exhausted	REACTOME_PROCESSING_OF_CAPPED_INTRONLESS_PRE_MRNA	0.503724	2	0.00662252	0.00259516	2.55188
MCF7_+E2_only_Exhausted	REACTOME_SIGNALING_BY_HEDGEHOG	0.513712	6	0.0198675	0.0128028	1.55182
MCF7_+E2_only_Exhausted	Mutated_metUp_Single	0.513712	21	0.0695364	0.0565744	1.22911
MCF7_+E2_only_Exhausted	REACTOME_SIGNALING_BY_NOTCH1_PEST_DOMAIN_MUTANTS_IN_CANCER	0.517626	3	0.00993377	0.0050173	1.9799
MCF7_+E2_only_Exhausted	REACTOME_DISORDERS_OF_TRANSMEMBRANE_TRANSPORTERS	0.52927	6	0.0198675	0.0129758	1.53113
MCF7_+E2_only_Exhausted	REACTOME_INFECTION_WITH_MYCOBACTERIUM_TUBERCULOSIS	0.535975	2	0.00662252	0.00276817	2.39238
MCF7_+E2_only_Exhausted	REACTOME_KINESINS	0.535975	2	0.00662252	0.00276817	2.39238
MCF7_+E2_only_Exhausted	REACTOME_SENESCENCE_ASSOCIATED_SECRETORY_PHENOTYPE_SASP_	0.535975	2	0.00662252	0.00276817	2.39238
MCF7_+E2_only_Exhausted	Mutated_Any_Single	0.557271	50	0.165563	0.148097	1.11794
MCF7_+E2_only_Exhausted	HALLMARK_SPERMATOGENESIS	0.569387	4	0.013245	0.00795848	1.66427
MCF7_+E2_only_Exhausted	REACTOME_BMAL1_CLOCK_NPAS2_ACTIVATES_CIRCADIAN_GENE_EXPRESSION	0.569387	2	0.00662252	0.00294118	2.25166
MCF7_+E2_only_Exhausted	REACTOME_EXTENSION_OF_TELOMERES	0.569387	2	0.00662252	0.00294118	2.25166
MCF7_+E2_only_Exhausted	REACTOME_FORMATION_OF_THE_BETA_CATENIN_TCF_TRANSACTIVATING_COMPLEX	0.569387	2	0.00662252	0.00294118	2.25166
MCF7_+E2_only_Exhausted	REACTOME_SYNTHESIS_OF_ACTIVE_UBIQUITIN_ROLES_OF_E1_AND_E2_ENZYMES	0.569387	2	0.00662252	0.00294118	2.25166
MCF7_+E2_only_Exhausted	REACTOME_CHREBP_ACTIVATES_METABOLIC_GENE_EXPRESSION	0.588678	1	0.00331126	0.000865052	3.82781
MCF7_+E2_only_Exhausted	REACTOME_CYTOSOLIC_IRON_SULFUR_CLUSTER_ASSEMBLY	0.588678	1	0.00331126	0.000865052	3.82781
MCF7_+E2_only_Exhausted	REACTOME_LOSS_OF_FUNCTION_OF_MECP2_IN_RETT_SYNDROME	0.588678	1	0.00331126	0.000865052	3.82781
MCF7_+E2_only_Exhausted	REACTOME_NOTCH2_INTRACELLULAR_DOMAIN_REGULATES_TRANSCRIPTION	0.588678	1	0.00331126	0.000865052	3.82781
MCF7_+E2_only_Exhausted	REACTOME_REACTIONS_SPECIFIC_TO_THE_COMPLEX_N_GLYCAN_SYNTHESIS_PATHWAY	0.588678	1	0.00331126	0.000865052	3.82781
MCF7_+E2_only_Exhausted	REACTOME_ESTROGEN_DEPENDENT_GENE_EXPRESSION	0.595113	4	0.013245	0.0083045	1.59492
MCF7_+E2_only_Exhausted	REACTOME_ASSEMBLY_AND_CELL_SURFACE_PRESENTATION_OF_NMDA_RECEPTORS	0.595113	2	0.00662252	0.00311419	2.12656
MCF7_+E2_only_Exhausted	REACTOME_MEIOSIS	0.595113	2	0.00662252	0.00311419	2.12656
MCF7_+E2_only_Exhausted	REACTOME_APC_C_CDH1_MEDIATED_DEGRADATION_OF_CDC20_AND_OTHER_APC_C_CDH1_TARGETED_PROTEINS_IN_LATE_MITOSIS_EARLY_G1	0.596148	3	0.00993377	0.00570934	1.73992
MCF7_+E2_only_Exhausted	REACTOME_DEGRADATION_OF_GLI1_BY_THE_PROTEASOME	0.596148	3	0.00993377	0.00570934	1.73992
MCF7_+E2_only_Exhausted	REACTOME_RNA_POLYMERASE_II_TRANSCRIPTION_TERMINATION	0.596148	3	0.00993377	0.00570934	1.73992
MCF7_+E2_only_Exhausted	REACTOME_SCF_SKP2_MEDIATED_DEGRADATION_OF_P27_P21	0.596148	3	0.00993377	0.00570934	1.73992
MCF7_+E2_only_Exhausted	REACTOME_RHO_GTPASES_ACTIVATE_FORMINS	0.603254	5	0.0165563	0.0112457	1.47224
MCF7_+E2_only_Exhausted	REACTOME_TP53_REGULATES_METABOLIC_GENES	0.603254	4	0.013245	0.00847751	1.56237
MCF7_+E2_only_Exhausted	REACTOME_TRANSCRIPTIONAL_REGULATION_BY_THE_AP_2_TFAP2_FAMILY_OF_TRANSCRIPTION_FACTORS	0.622022	2	0.00662252	0.0032872	2.01464
MCF7_+E2_only_Exhausted	REACTOME_METABOLISM_OF_AMINO_ACIDS_AND_DERIVATIVES	0.625554	10	0.0331126	0.0261246	1.26749
MCF7_+E2_only_Exhausted	REACTOME_ABERRANT_REGULATION_OF_MITOTIC_EXIT_IN_CANCER_DUE_TO_RB1_DEFECTS	0.628497	1	0.00331126	0.00103806	3.18985
MCF7_+E2_only_Exhausted	REACTOME_ADENYLATE_CYCLASE_ACTIVATING_PATHWAY	0.628497	1	0.00331126	0.00103806	3.18985
MCF7_+E2_only_Exhausted	REACTOME_CONVERSION_FROM_APC_C_CDC20_TO_APC_C_CDH1_IN_LATE_ANAPHASE	0.628497	1	0.00331126	0.00103806	3.18985
MCF7_+E2_only_Exhausted	REACTOME_HUR_ELAVL1_BINDS_AND_STABILIZES_MRNA	0.628497	1	0.00331126	0.00103806	3.18985
MCF7_+E2_only_Exhausted	REACTOME_PROLACTIN_RECEPTOR_SIGNALING	0.628497	1	0.00331126	0.00103806	3.18985
MCF7_+E2_only_Exhausted	REACTOME_REGULATION_OF_INNATE_IMMUNE_RESPONSES_TO_CYTOSOLIC_DNA	0.628497	1	0.00331126	0.00103806	3.18985
MCF7_+E2_only_Exhausted	REACTOME_TRANSPORT_OF_CONNEXONS_TO_THE_PLASMA_MEMBRANE	0.628497	1	0.00331126	0.00103806	3.18985
MCF7_+E2_only_Exhausted	REACTOME_SELECTIVE_AUTOPHAGY	0.628497	3	0.00993377	0.00605536	1.64049
MCF7_+E2_only_Exhausted	REACTOME_GENE_AND_PROTEIN_EXPRESSION_BY_JAK_STAT_SIGNALING_AFTER_INTERLEUKIN_12_STIMULATION	0.635323	2	0.00662252	0.00346021	1.91391
MCF7_+E2_only_Exhausted	REACTOME_GLUCAGON_SIGNALING_IN_METABOLIC_REGULATION	0.635323	2	0.00662252	0.00346021	1.91391
MCF7_+E2_only_Exhausted	REACTOME_RUNX1_REGULATES_TRANSCRIPTION_OF_GENES_INVOLVED_IN_DIFFERENTIATION_OF_HSCS	0.651213	3	0.00993377	0.00622837	1.59492
MCF7_+E2_only_Exhausted	REACTOME_FCGR3A_MEDIATED_IL10_SYNTHESIS	0.651213	2	0.00662252	0.00363322	1.82277
MCF7_+E2_only_Exhausted	REACTOME_G2_M_DNA_DAMAGE_CHECKPOINT	0.651213	2	0.00662252	0.00363322	1.82277
MCF7_+E2_only_Exhausted	REACTOME_RAF_ACTIVATION	0.651213	2	0.00662252	0.00363322	1.82277
MCF7_+E2_only_Exhausted	REACTOME_CILIUM_ASSEMBLY	0.651213	6	0.0198675	0.0150519	1.31994
MCF7_+E2_only_Exhausted	REACTOME_SIGNALING_BY_NOTCH1	0.651213	3	0.00993377	0.00640138	1.55182
MCF7_+E2_only_Exhausted	REACTOME_ADENYLATE_CYCLASE_INHIBITORY_PATHWAY	0.651213	1	0.00331126	0.00121107	2.73415
MCF7_+E2_only_Exhausted	REACTOME_CREB1_PHOSPHORYLATION_THROUGH_THE_ACTIVATION_OF_ADENYLATE_CYCLASE	0.651213	1	0.00331126	0.00121107	2.73415
MCF7_+E2_only_Exhausted	REACTOME_GLUTATHIONE_SYNTHESIS_AND_RECYCLING	0.651213	1	0.00331126	0.00121107	2.73415
MCF7_+E2_only_Exhausted	REACTOME_INHIBITION_OF_THE_PROTEOLYTIC_ACTIVITY_OF_APC_C_REQUIRED_FOR_THE_ONSET_OF_ANAPHASE_BY_MITOTIC_SPINDLE_CHECKPOINT_COMPONENTS	0.651213	1	0.00331126	0.00121107	2.73415
MCF7_+E2_only_Exhausted	REACTOME_NEPHRIN_FAMILY_INTERACTIONS	0.651213	1	0.00331126	0.00121107	2.73415
MCF7_+E2_only_Exhausted	REACTOME_PHOSPHORYLATION_OF_THE_APC_C	0.651213	1	0.00331126	0.00121107	2.73415
MCF7_+E2_only_Exhausted	REACTOME_PLASMA_LIPOPROTEIN_ASSEMBLY	0.651213	1	0.00331126	0.00121107	2.73415
MCF7_+E2_only_Exhausted	REACTOME_PROCESSING_OF_SMDT1	0.651213	1	0.00331126	0.00121107	2.73415
MCF7_+E2_only_Exhausted	REACTOME_REPRESSION_OF_WNT_TARGET_GENES	0.651213	1	0.00331126	0.00121107	2.73415
MCF7_+E2_only_Exhausted	REACTOME_RESOLUTION_OF_D_LOOP_STRUCTURES_THROUGH_SYNTHESIS_DEPENDENT_STRAND_ANNEALING_SDSA_	0.651213	1	0.00331126	0.00121107	2.73415
MCF7_+E2_only_Exhausted	REACTOME_ROBO_RECEPTORS_BIND_AKAP5	0.651213	1	0.00331126	0.00121107	2.73415
MCF7_+E2_only_Exhausted	REACTOME_SUPPRESSION_OF_PHAGOSOMAL_MATURATION	0.651213	1	0.00331126	0.00121107	2.73415
MCF7_+E2_only_Exhausted	REACTOME_UNWINDING_OF_DNA	0.651213	1	0.00331126	0.00121107	2.73415
MCF7_+E2_only_Exhausted	REACTOME_NEUREXINS_AND_NEUROLIGINS	0.663427	2	0.00662252	0.00380623	1.73992
MCF7_+E2_only_Exhausted	HALLMARK_ADIPOGENESIS	0.664226	6	0.0198675	0.0155709	1.27594
MCF7_+E2_only_Exhausted	REACTOME_CIRCADIAN_CLOCK	0.664226	3	0.00993377	0.0067474	1.47224
MCF7_+E2_only_Exhausted	REACTOME_RNA_POLYMERASE_II_TRANSCRIPTION	0.664226	32	0.10596	0.0975779	1.0859
MCF7_+E2_only_Exhausted	REACTOME_METABOLISM_OF_CARBOHYDRATES	0.664226	9	0.0298013	0.0249135	1.19619
MCF7_+E2_only_Exhausted	HALLMARK_APICAL_SURFACE	0.664226	2	0.00662252	0.00397924	1.66427
MCF7_+E2_only_Exhausted	REACTOME_CYCLIN_D_ASSOCIATED_EVENTS_IN_G1	0.664226	2	0.00662252	0.00397924	1.66427
MCF7_+E2_only_Exhausted	REACTOME_MAPK6_MAPK4_SIGNALING	0.664226	4	0.013245	0.00986159	1.34309
MCF7_+E2_only_Exhausted	REACTOME_APC_C_CDC20_MEDIATED_DEGRADATION_OF_CYCLIN_B	0.664226	1	0.00331126	0.00138408	2.39238
MCF7_+E2_only_Exhausted	REACTOME_APC_CDC20_MEDIATED_DEGRADATION_OF_NEK2A	0.664226	1	0.00331126	0.00138408	2.39238
MCF7_+E2_only_Exhausted	REACTOME_CELL_EXTRACELLULAR_MATRIX_INTERACTIONS	0.664226	1	0.00331126	0.00138408	2.39238
MCF7_+E2_only_Exhausted	REACTOME_DISEASES_ASSOCIATED_WITH_N_GLYCOSYLATION_OF_PROTEINS	0.664226	1	0.00331126	0.00138408	2.39238
MCF7_+E2_only_Exhausted	REACTOME_GLYCOGEN_STORAGE_DISEASES	0.664226	1	0.00331126	0.00138408	2.39238
MCF7_+E2_only_Exhausted	REACTOME_GLYCOGEN_SYNTHESIS	0.664226	1	0.00331126	0.00138408	2.39238
MCF7_+E2_only_Exhausted	REACTOME_MAP3K8_TPL2_DEPENDENT_MAPK1_3_ACTIVATION	0.664226	1	0.00331126	0.00138408	2.39238
MCF7_+E2_only_Exhausted	REACTOME_MRNA_DECAY_BY_3_TO_5_EXORIBONUCLEASE	0.664226	1	0.00331126	0.00138408	2.39238
MCF7_+E2_only_Exhausted	REACTOME_PROCESSING_OF_INTRONLESS_PRE_MRNAS	0.664226	1	0.00331126	0.00138408	2.39238
MCF7_+E2_only_Exhausted	REACTOME_RAS_ACTIVATION_UPON_CA2_INFLUX_THROUGH_NMDA_RECEPTOR	0.664226	1	0.00331126	0.00138408	2.39238
MCF7_+E2_only_Exhausted	REACTOME_RECOGNITION_OF_DNA_DAMAGE_BY_PCNA_CONTAINING_REPLICATION_COMPLEX	0.664226	1	0.00331126	0.00138408	2.39238
MCF7_+E2_only_Exhausted	REACTOME_REGULATION_OF_GLYCOLYSIS_BY_FRUCTOSE_2_6_BISPHOSPHATE_METABOLISM	0.664226	1	0.00331126	0.00138408	2.39238
MCF7_+E2_only_Exhausted	REACTOME_TP53_REGULATES_TRANSCRIPTION_OF_GENES_INVOLVED_IN_G1_CELL_CYCLE_ARREST	0.664226	1	0.00331126	0.00138408	2.39238
MCF7_+E2_only_Exhausted	REACTOME_TRANSCRIPTION_OF_E2F_TARGETS_UNDER_NEGATIVE_CONTROL_BY_P107_RBL1_AND_P130_RBL2_IN_COMPLEX_WITH_HDAC1	0.664226	1	0.00331126	0.00138408	2.39238
MCF7_+E2_only_Exhausted	REACTOME_PYRUVATE_METABOLISM_AND_CITRIC_ACID_TCA_CYCLE	0.673094	2	0.00662252	0.00415225	1.59492
MCF7_+E2_only_Exhausted	REACTOME_SIGNALING_BY_MODERATE_KINASE_ACTIVITY_BRAF_MUTANTS	0.673094	2	0.00662252	0.00415225	1.59492
MCF7_+E2_only_Exhausted	REACTOME_TP53_REGULATES_TRANSCRIPTION_OF_CELL_CYCLE_GENES	0.673094	2	0.00662252	0.00415225	1.59492
MCF7_+E2_only_Exhausted	REACTOME_VASOPRESSIN_REGULATES_RENAL_WATER_HOMEOSTASIS_VIA_AQUAPORINS	0.673094	2	0.00662252	0.00415225	1.59492
MCF7_+E2_only_Exhausted	REACTOME_DEGRADATION_OF_BETA_CATENIN_BY_THE_DESTRUCTION_COMPLEX	0.677039	3	0.00993377	0.00709343	1.40042
MCF7_+E2_only_Exhausted	REACTOME_INTEGRATION_OF_ENERGY_METABOLISM	0.681619	4	0.013245	0.0102076	1.29756
MCF7_+E2_only_Exhausted	HALLMARK_WNT_BETA_CATENIN_SIGNALING	0.681619	2	0.00662252	0.00432526	1.53113
MCF7_+E2_only_Exhausted	REACTOME_CA_DEPENDENT_EVENTS	0.681619	2	0.00662252	0.00432526	1.53113
MCF7_+E2_only_Exhausted	MCF7_-E2_Exhausted	0.681619	14	0.0463576	0.0416955	1.11181
MCF7_+E2_only_Exhausted	REACTOME_DEPOLYMERISATION_OF_THE_NUCLEAR_LAMINA	0.681619	1	0.00331126	0.00155709	2.12656
MCF7_+E2_only_Exhausted	REACTOME_PREGNENOLONE_BIOSYNTHESIS	0.681619	1	0.00331126	0.00155709	2.12656
MCF7_+E2_only_Exhausted	REACTOME_RAS_PROCESSING	0.681619	1	0.00331126	0.00155709	2.12656
MCF7_+E2_only_Exhausted	REACTOME_RESOLUTION_OF_D_LOOP_STRUCTURES	0.681619	1	0.00331126	0.00155709	2.12656
MCF7_+E2_only_Exhausted	REACTOME_SIGNALING_BY_PDGFR_IN_DISEASE	0.681619	1	0.00331126	0.00155709	2.12656
MCF7_+E2_only_Exhausted	REACTOME_SLBP_DEPENDENT_PROCESSING_OF_REPLICATION_DEPENDENT_HISTONE_PRE_MRNAS	0.681619	1	0.00331126	0.00155709	2.12656
MCF7_+E2_only_Exhausted	REACTOME_TP53_REGULATES_TRANSCRIPTION_OF_GENES_INVOLVED_IN_G2_CELL_CYCLE_ARREST	0.681619	1	0.00331126	0.00155709	2.12656
MCF7_+E2_only_Exhausted	REACTOME_TRANSCRIPTION_OF_E2F_TARGETS_UNDER_NEGATIVE_CONTROL_BY_DREAM_COMPLEX	0.681619	1	0.00331126	0.00155709	2.12656
MCF7_+E2_only_Exhausted	REACTOME_TRISTETRAPROLIN_TTP_ZFP36_BINDS_AND_DESTABILIZES_MRNA	0.681619	1	0.00331126	0.00155709	2.12656
MCF7_+E2_only_Exhausted	REACTOME_REGULATION_OF_TP53_ACTIVITY	0.68451	5	0.0165563	0.0134948	1.22686
MCF7_+E2_only_Exhausted	REACTOME_PROTEIN_FOLDING	0.689913	3	0.00993377	0.00743945	1.33528
MCF7_+E2_only_Exhausted	REACTOME_INTERLEUKIN_12_SIGNALING	0.689913	2	0.00662252	0.00449827	1.47224
MCF7_+E2_only_Exhausted	REACTOME_EPIGENETIC_REGULATION_OF_GENE_EXPRESSION	0.689913	3	0.00993377	0.00761246	1.30494
MCF7_+E2_only_Exhausted	REACTOME_SIGNALING_BY_NOTCH4	0.689913	3	0.00993377	0.00761246	1.30494
MCF7_+E2_only_Exhausted	REACTOME_BUTYRATE_RESPONSE_FACTOR_1_BRF1_BINDS_AND_DESTABILIZES_MRNA	0.689913	1	0.00331126	0.0017301	1.91391
MCF7_+E2_only_Exhausted	REACTOME_CREB1_PHOSPHORYLATION_THROUGH_NMDA_RECEPTOR_MEDIATED_ACTIVATION_OF_RAS_SIGNALING	0.689913	1	0.00331126	0.0017301	1.91391
MCF7_+E2_only_Exhausted	REACTOME_DNA_DAMAGE_TELOMERE_STRESS_INDUCED_SENESCENCE	0.689913	1	0.00331126	0.0017301	1.91391
MCF7_+E2_only_Exhausted	REACTOME_INHIBITION_OF_DNA_RECOMBINATION_AT_TELOMERE	0.689913	1	0.00331126	0.0017301	1.91391
MCF7_+E2_only_Exhausted	REACTOME_INITIATION_OF_NUCLEAR_ENVELOPE_NE_REFORMATION	0.689913	1	0.00331126	0.0017301	1.91391
MCF7_+E2_only_Exhausted	REACTOME_KSRP_KHSRP_BINDS_AND_DESTABILIZES_MRNA	0.689913	1	0.00331126	0.0017301	1.91391
MCF7_+E2_only_Exhausted	REACTOME_PENTOSE_PHOSPHATE_PATHWAY	0.689913	1	0.00331126	0.0017301	1.91391
MCF7_+E2_only_Exhausted	REACTOME_RAP1_SIGNALLING	0.689913	1	0.00331126	0.0017301	1.91391
MCF7_+E2_only_Exhausted	REACTOME_RESPONSE_OF_EIF2AK1_HRI_TO_HEME_DEFICIENCY	0.689913	1	0.00331126	0.0017301	1.91391
MCF7_+E2_only_Exhausted	REACTOME_SIGNALING_BY_FGFR2_IIIA_TM	0.689913	1	0.00331126	0.0017301	1.91391
MCF7_+E2_only_Exhausted	REACTOME_TRIGLYCERIDE_CATABOLISM	0.689913	1	0.00331126	0.0017301	1.91391
MCF7_+E2_only_Exhausted	HALLMARK_REACTIVE_OXYGEN_SPECIES_PATHWAY	0.689913	2	0.00662252	0.00467128	1.41771
MCF7_+E2_only_Exhausted	REACTOME_AQUAPORIN_MEDIATED_TRANSPORT	0.689913	2	0.00662252	0.00467128	1.41771
MCF7_+E2_only_Exhausted	REACTOME_NON_INTEGRIN_MEMBRANE_ECM_INTERACTIONS	0.689913	2	0.00662252	0.00467128	1.41771
MCF7_+E2_only_Exhausted	REACTOME_REPRODUCTION	0.689913	2	0.00662252	0.00467128	1.41771
MCF7_+E2_only_Exhausted	REACTOME_ESR_MEDIATED_SIGNALING	0.702165	5	0.0165563	0.0141869	1.16702
MCF7_+E2_only_Exhausted	Mutated_metUp_Multiple	0.702165	2	0.00662252	0.00484429	1.36708
MCF7_+E2_only_Exhausted	REACTOME_DAG_AND_IP3_SIGNALING	0.702165	2	0.00662252	0.00484429	1.36708
MCF7_+E2_only_Exhausted	REACTOME_DEADENYLATION_DEPENDENT_MRNA_DECAY	0.702165	2	0.00662252	0.00484429	1.36708
MCF7_+E2_only_Exhausted	REACTOME_INTERLEUKIN_4_AND_INTERLEUKIN_13_SIGNALING	0.702165	3	0.00993377	0.00795848	1.2482
MCF7_+E2_only_Exhausted	REACTOME_ACTIVATION_OF_AMPK_DOWNSTREAM_OF_NMDARS	0.702165	1	0.00331126	0.00190311	1.73992
MCF7_+E2_only_Exhausted	REACTOME_CD209_DC_SIGN_SIGNALING	0.702165	1	0.00331126	0.00190311	1.73992
MCF7_+E2_only_Exhausted	REACTOME_CHOLESTEROL_BIOSYNTHESIS	0.702165	1	0.00331126	0.00190311	1.73992
MCF7_+E2_only_Exhausted	REACTOME_INTERCONVERSION_OF_NUCLEOTIDE_DI_AND_TRIPHOSPHATES	0.702165	1	0.00331126	0.00190311	1.73992
MCF7_+E2_only_Exhausted	REACTOME_N_GLYCAN_ANTENNAE_ELONGATION_IN_THE_MEDIAL_TRANS_GOLGI	0.702165	1	0.00331126	0.00190311	1.73992
MCF7_+E2_only_Exhausted	REACTOME_NEGATIVE_REGULATION_OF_NMDA_RECEPTOR_MEDIATED_NEURONAL_TRANSMISSION	0.702165	1	0.00331126	0.00190311	1.73992
MCF7_+E2_only_Exhausted	REACTOME_NITRIC_OXIDE_STIMULATES_GUANYLATE_CYCLASE	0.702165	1	0.00331126	0.00190311	1.73992
MCF7_+E2_only_Exhausted	REACTOME_NOTCH4_INTRACELLULAR_DOMAIN_REGULATES_TRANSCRIPTION	0.702165	1	0.00331126	0.00190311	1.73992
MCF7_+E2_only_Exhausted	REACTOME_RHO_GTPASES_ACTIVATE_IQGAPS	0.702165	1	0.00331126	0.00190311	1.73992
MCF7_+E2_only_Exhausted	REACTOME_SIGNALING_BY_CYTOSOLIC_FGFR1_FUSION_MUTANTS	0.702165	1	0.00331126	0.00190311	1.73992
MCF7_+E2_only_Exhausted	REACTOME_UNBLOCKING_OF_NMDA_RECEPTORS_GLUTAMATE_BINDING_AND_ACTIVATION	0.702165	1	0.00331126	0.00190311	1.73992
MCF7_+E2_only_Exhausted	REACTOME_ACTIVATION_OF_NMDA_RECEPTORS_AND_POSTSYNAPTIC_EVENTS	0.703435	3	0.00993377	0.00813149	1.22164
MCF7_+E2_only_Exhausted	REACTOME_CYTOKINE_SIGNALING_IN_IMMUNE_SYSTEM	0.716954	20	0.0662252	0.0636678	1.04017
MCF7_+E2_only_Exhausted	HALLMARK_DNA_REPAIR	0.716954	4	0.013245	0.0115917	1.14263
MCF7_+E2_only_Exhausted	REACTOME_DECTIN_1_MEDIATED_NONCANONICAL_NF_KB_SIGNALING	0.716954	2	0.00662252	0.00519031	1.27594
MCF7_+E2_only_Exhausted	REACTOME_INTERLEUKIN_12_FAMILY_SIGNALING	0.716954	2	0.00662252	0.00519031	1.27594
MCF7_+E2_only_Exhausted	REACTOME_METABOLISM_OF_POLYAMINES	0.716954	2	0.00662252	0.00519031	1.27594
MCF7_+E2_only_Exhausted	REACTOME_NEGATIVE_REGULATION_OF_NOTCH4_SIGNALING	0.716954	2	0.00662252	0.00519031	1.27594
MCF7_+E2_only_Exhausted	REACTOME_ABORTIVE_ELONGATION_OF_HIV_1_TRANSCRIPT_IN_THE_ABSENCE_OF_TAT	0.716954	1	0.00331126	0.00207612	1.59492
MCF7_+E2_only_Exhausted	REACTOME_DEADENYLATION_OF_MRNA	0.716954	1	0.00331126	0.00207612	1.59492
MCF7_+E2_only_Exhausted	REACTOME_ENDOGENOUS_STEROLS	0.716954	1	0.00331126	0.00207612	1.59492
MCF7_+E2_only_Exhausted	REACTOME_ESTROGEN_DEPENDENT_NUCLEAR_EVENTS_DOWNSTREAM_OF_ESR_MEMBRANE_SIGNALING	0.716954	1	0.00331126	0.00207612	1.59492
MCF7_+E2_only_Exhausted	REACTOME_MITOCHONDRIAL_CALCIUM_ION_TRANSPORT	0.716954	1	0.00331126	0.00207612	1.59492
MCF7_+E2_only_Exhausted	REACTOME_PIWI_INTERACTING_RNA_PIRNA_BIOGENESIS	0.716954	1	0.00331126	0.00207612	1.59492
MCF7_+E2_only_Exhausted	REACTOME_TRANSCRIPTIONAL_REGULATION_BY_RUNX3	0.716954	3	0.00993377	0.00847751	1.17178
MCF7_+E2_only_Exhausted	REACTOME_ASSEMBLY_OF_THE_PRE_REPLICATIVE_COMPLEX	0.727359	2	0.00662252	0.00536332	1.23478
MCF7_+E2_only_Exhausted	REACTOME_COPII_MEDIATED_VESICLE_TRANSPORT	0.727359	2	0.00662252	0.00536332	1.23478
MCF7_+E2_only_Exhausted	REACTOME_MHC_CLASS_II_ANTIGEN_PRESENTATION	0.727359	3	0.00993377	0.00865052	1.14834
MCF7_+E2_only_Exhausted	REACTOME_REGULATION_OF_MRNA_STABILITY_BY_PROTEINS_THAT_BIND_AU_RICH_ELEMENTS	0.727359	3	0.00993377	0.00865052	1.14834
MCF7_+E2_only_Exhausted	REACTOME_UB_SPECIFIC_PROCESSING_PROTEASES	0.727359	5	0.0165563	0.0152249	1.08745
MCF7_+E2_only_Exhausted	REACTOME_METABOLISM_OF_STEROIDS	0.73205	4	0.013245	0.0121107	1.09366
MCF7_+E2_only_Exhausted	REACTOME_DNA_STRAND_ELONGATION	0.73205	1	0.00331126	0.00224913	1.47224
MCF7_+E2_only_Exhausted	REACTOME_DUAL_INCISION_IN_GG_NER	0.73205	1	0.00331126	0.00224913	1.47224
MCF7_+E2_only_Exhausted	REACTOME_NONHOMOLOGOUS_END_JOINING_NHEJ_	0.73205	1	0.00331126	0.00224913	1.47224
MCF7_+E2_only_Exhausted	REACTOME_NOTCH3_INTRACELLULAR_DOMAIN_REGULATES_TRANSCRIPTION	0.73205	1	0.00331126	0.00224913	1.47224
MCF7_+E2_only_Exhausted	REACTOME_RESOLUTION_OF_ABASIC_SITES_AP_SITES_	0.73205	1	0.00331126	0.00224913	1.47224
MCF7_+E2_only_Exhausted	REACTOME_PHASE_I_FUNCTIONALIZATION_OF_COMPOUNDS	0.73205	2	0.00662252	0.00553633	1.19619
MCF7_+E2_only_Exhausted	REACTOME_DISEASE	0.73205	36	0.119205	0.118166	1.00879
MCF7_+E2_only_Exhausted	REACTOME_MAPK_FAMILY_SIGNALING_CASCADES	0.733608	9	0.0298013	0.0288927	1.03145
MCF7_+E2_only_Exhausted	REACTOME_ACTIVATION_OF_ANTERIOR_HOX_GENES_IN_HINDBRAIN_DEVELOPMENT_DURING_EARLY_EMBRYOGENESIS	0.733608	2	0.00662252	0.00570934	1.15994
MCF7_+E2_only_Exhausted	REACTOME_COPI_DEPENDENT_GOLGI_TO_ER_RETROGRADE_TRAFFIC	0.733608	2	0.00662252	0.00570934	1.15994
MCF7_+E2_only_Exhausted	REACTOME_G_PROTEIN_MEDIATED_EVENTS	0.733608	2	0.00662252	0.00570934	1.15994
MCF7_+E2_only_Exhausted	REACTOME_G1_S_DNA_DAMAGE_CHECKPOINTS	0.733608	2	0.00662252	0.00570934	1.15994
MCF7_+E2_only_Exhausted	REACTOME_THE_ROLE_OF_GTSE1_IN_G2_M_PROGRESSION_AFTER_G2_CHECKPOINT	0.733608	2	0.00662252	0.00570934	1.15994
MCF7_+E2_only_Exhausted	REACTOME_ANTIGEN_PRESENTATION_FOLDING_ASSEMBLY_AND_PEPTIDE_LOADING_OF_CLASS_I_MHC	0.733608	1	0.00331126	0.00242215	1.36708
MCF7_+E2_only_Exhausted	REACTOME_ATF4_ACTIVATES_GENES_IN_RESPONSE_TO_ENDOPLASMIC_RETICULUM_STRESS	0.733608	1	0.00331126	0.00242215	1.36708
MCF7_+E2_only_Exhausted	REACTOME_DARPP_32_EVENTS	0.733608	1	0.00331126	0.00242215	1.36708
MCF7_+E2_only_Exhausted	REACTOME_DOWNREGULATION_OF_TGF_BETA_RECEPTOR_SIGNALING	0.733608	1	0.00331126	0.00242215	1.36708
MCF7_+E2_only_Exhausted	REACTOME_GLYCOGEN_METABOLISM	0.733608	1	0.00331126	0.00242215	1.36708
MCF7_+E2_only_Exhausted	REACTOME_HDMS_DEMETHYLATE_HISTONES	0.733608	1	0.00331126	0.00242215	1.36708
MCF7_+E2_only_Exhausted	REACTOME_HSF1_ACTIVATION	0.733608	1	0.00331126	0.00242215	1.36708
MCF7_+E2_only_Exhausted	REACTOME_LONG_TERM_POTENTIATION	0.733608	1	0.00331126	0.00242215	1.36708
MCF7_+E2_only_Exhausted	REACTOME_METABOLIC_DISORDERS_OF_BIOLOGICAL_OXIDATION_ENZYMES	0.733608	1	0.00331126	0.00242215	1.36708
MCF7_+E2_only_Exhausted	REACTOME_AUTOPHAGY	0.744789	4	0.013245	0.0128028	1.03454
MCF7_+E2_only_Exhausted	REACTOME_PEROXISOMAL_PROTEIN_IMPORT	0.744789	2	0.00662252	0.00605536	1.09366
MCF7_+E2_only_Exhausted	REACTOME_DNA_DAMAGE_BYPASS	0.744789	1	0.00331126	0.00259516	1.27594
MCF7_+E2_only_Exhausted	REACTOME_FATTY_ACYL_COA_BIOSYNTHESIS	0.744789	1	0.00331126	0.00259516	1.27594
MCF7_+E2_only_Exhausted	REACTOME_GAP_JUNCTION_ASSEMBLY	0.744789	1	0.00331126	0.00259516	1.27594
MCF7_+E2_only_Exhausted	REACTOME_HDACS_DEACETYLATE_HISTONES	0.744789	1	0.00331126	0.00259516	1.27594
MCF7_+E2_only_Exhausted	REACTOME_METABOLISM_OF_STEROID_HORMONES	0.744789	1	0.00331126	0.00259516	1.27594
MCF7_+E2_only_Exhausted	REACTOME_MICRORNA_MIRNA_BIOGENESIS	0.744789	1	0.00331126	0.00259516	1.27594
MCF7_+E2_only_Exhausted	REACTOME_SIGNALING_BY_NOTCH2	0.744789	1	0.00331126	0.00259516	1.27594
MCF7_+E2_only_Exhausted	REACTOME_SMAD2_SMAD3_SMAD4_HETEROTRIMER_REGULATES_TRANSCRIPTION	0.744789	1	0.00331126	0.00259516	1.27594
MCF7_+E2_only_Exhausted	REACTOME_THE_PHOTOTRANSDUCTION_CASCADE	0.744789	1	0.00331126	0.00259516	1.27594
MCF7_+E2_only_Exhausted	REACTOME_SIGNALING_BY_FGFR_IN_DISEASE	0.755637	2	0.00662252	0.00622837	1.06328
MCF7_+E2_only_Exhausted	REACTOME_SIGNALING_BY_TGF_BETA_RECEPTOR_COMPLEX	0.755637	2	0.00662252	0.00622837	1.06328
MCF7_+E2_only_Exhausted	REACTOME_AGGREPHAGY	0.755637	1	0.00331126	0.00276817	1.19619
MCF7_+E2_only_Exhausted	REACTOME_ATTENUATION_PHASE	0.755637	1	0.00331126	0.00276817	1.19619
MCF7_+E2_only_Exhausted	REACTOME_BASE_EXCISION_REPAIR	0.755637	1	0.00331126	0.00276817	1.19619
MCF7_+E2_only_Exhausted	REACTOME_GLUCONEOGENESIS	0.755637	1	0.00331126	0.00276817	1.19619
MCF7_+E2_only_Exhausted	REACTOME_PERK_REGULATES_GENE_EXPRESSION	0.755637	1	0.00331126	0.00276817	1.19619
MCF7_+E2_only_Exhausted	REACTOME_RECYCLING_PATHWAY_OF_L1	0.755637	1	0.00331126	0.00276817	1.19619
MCF7_+E2_only_Exhausted	REACTOME_TRANSCRIPTIONAL_REGULATION_BY_E2F6	0.755637	1	0.00331126	0.00276817	1.19619
MCF7_+E2_only_Exhausted	REACTOME_TRIGLYCERIDE_METABOLISM	0.755637	1	0.00331126	0.00276817	1.19619
MCF7_+E2_only_Exhausted	REACTOME_PROTEIN_PROTEIN_INTERACTIONS_AT_SYNAPSES	0.768344	2	0.00662252	0.00657439	1.00732
MCF7_+E2_only_Exhausted	REACTOME_REGULATION_OF_RUNX2_EXPRESSION_AND_ACTIVITY	0.768344	2	0.00662252	0.00657439	1.00732
MCF7_+E2_only_Exhausted	REACTOME_DISEASES_OF_MITOTIC_CELL_CYCLE	0.768344	1	0.00331126	0.00294118	1.12583
MCF7_+E2_only_Exhausted	REACTOME_FGFR2_MUTANT_RECEPTOR_ACTIVATION	0.768344	1	0.00331126	0.00294118	1.12583
MCF7_+E2_only_Exhausted	REACTOME_GLUTATHIONE_CONJUGATION	0.768344	1	0.00331126	0.00294118	1.12583
MCF7_+E2_only_Exhausted	REACTOME_REGULATION_OF_TP53_EXPRESSION_AND_DEGRADATION	0.768344	1	0.00331126	0.00294118	1.12583
MCF7_+E2_only_Exhausted	REACTOME_TRANSCRIPTIONAL_REGULATION_BY_VENTX	0.768344	1	0.00331126	0.00294118	1.12583
MCF7_+E2_only_Exhausted	REACTOME_TRANSCRIPTIONAL_REGULATION_OF_GRANULOPOIESIS	0.768344	1	0.00331126	0.00294118	1.12583
MCF7_+E2_only_Exhausted	REACTOME_DOWNSTREAM_SIGNALING_EVENTS_OF_B_CELL_RECEPTOR_BCR_	0.771208	2	0.00662252	0.0067474	0.981491
MCF7_+E2_only_Exhausted	REACTOME_ONCOGENIC_MAPK_SIGNALING	0.771208	2	0.00662252	0.0067474	0.981491
MCF7_+E2_only_Exhausted	REACTOME_SIGNALING_BY_FGFR2	0.771208	2	0.00662252	0.0067474	0.981491
MCF7_+E2_only_Exhausted	REACTOME_TRANSPORT_TO_THE_GOLGI_AND_SUBSEQUENT_MODIFICATION	0.771208	4	0.013245	0.0140138	0.945139
MCF7_+E2_only_Exhausted	HALLMARK_NOTCH_SIGNALING	0.771208	1	0.00331126	0.00311419	1.06328
MCF7_+E2_only_Exhausted	REACTOME_ASSOCIATION_OF_TRIC_CCT_WITH_TARGET_PROTEINS_DURING_BIOSYNTHESIS	0.771208	1	0.00331126	0.00311419	1.06328
MCF7_+E2_only_Exhausted	REACTOME_B_WICH_COMPLEX_POSITIVELY_REGULATES_RRNA_EXPRESSION	0.771208	1	0.00331126	0.00311419	1.06328
MCF7_+E2_only_Exhausted	REACTOME_CARBOXYTERMINAL_POST_TRANSLATIONAL_MODIFICATIONS_OF_TUBULIN	0.771208	1	0.00331126	0.00311419	1.06328
MCF7_+E2_only_Exhausted	REACTOME_COOPERATION_OF_PDCL_PHLP1_AND_TRIC_CCT_IN_G_PROTEIN_BETA_FOLDING	0.771208	1	0.00331126	0.00311419	1.06328
MCF7_+E2_only_Exhausted	REACTOME_DISEASES_OF_CARBOHYDRATE_METABOLISM	0.771208	1	0.00331126	0.00311419	1.06328
MCF7_+E2_only_Exhausted	REACTOME_REGULATION_OF_MECP2_EXPRESSION_AND_ACTIVITY	0.771208	1	0.00331126	0.00311419	1.06328
MCF7_+E2_only_Exhausted	REACTOME_TGF_BETA_RECEPTOR_SIGNALING_ACTIVATES_SMADS	0.771208	1	0.00331126	0.00311419	1.06328
MCF7_+E2_only_Exhausted	REACTOME_TOLL_LIKE_RECEPTOR_10_TLR10_CASCADE	0.777179	2	0.00662252	0.00692042	0.956954
MCF7_+E2_only_Exhausted	REACTOME_FCERI_MEDIATED_NF_KB_ACTIVATION	0.784109	2	0.00662252	0.00709343	0.933613
MCF7_+E2_only_Exhausted	REACTOME_CYTOCHROME_P450_ARRANGED_BY_SUBSTRATE_TYPE	0.784109	1	0.00331126	0.0032872	1.00732
MCF7_+E2_only_Exhausted	REACTOME_GABA_B_RECEPTOR_ACTIVATION	0.784109	1	0.00331126	0.0032872	1.00732
MCF7_+E2_only_Exhausted	REACTOME_INTRAFLAGELLAR_TRANSPORT	0.784109	1	0.00331126	0.0032872	1.00732
MCF7_+E2_only_Exhausted	REACTOME_TRNA_MODIFICATION_IN_THE_NUCLEUS_AND_CYTOSOL	0.784109	1	0.00331126	0.0032872	1.00732
MCF7_+E2_only_Exhausted	REACTOME_INTRA_GOLGI_AND_RETROGRADE_GOLGI_TO_ER_TRAFFIC	0.790001	4	0.013245	0.0145329	0.911384
MCF7_+E2_only_Exhausted	REACTOME_HEDGEHOG_ON_STATE	0.790001	2	0.00662252	0.00726644	0.911384
MCF7_+E2_only_Exhausted	REACTOME_RAB_GEFS_EXCHANGE_GTP_FOR_GDP_ON_RABS	0.790001	2	0.00662252	0.00726644	0.911384
MCF7_+E2_only_Exhausted	REACTOME_TOLL_LIKE_RECEPTOR_9_TLR9_CASCADE	0.790001	2	0.00662252	0.00726644	0.911384
MCF7_+E2_only_Exhausted	REACTOME_DEACTIVATION_OF_THE_BETA_CATENIN_TRANSACTIVATING_COMPLEX	0.790001	1	0.00331126	0.00346021	0.956954
MCF7_+E2_only_Exhausted	REACTOME_FGFR1_MUTANT_RECEPTOR_ACTIVATION	0.790001	1	0.00331126	0.00346021	0.956954
MCF7_+E2_only_Exhausted	REACTOME_RMTS_METHYLATE_HISTONE_ARGININES	0.790001	1	0.00331126	0.00346021	0.956954
MCF7_+E2_only_Exhausted	REACTOME_TRANSCRIPTIONAL_ACTIVITY_OF_SMAD2_SMAD3_SMAD4_HETEROTRIMER	0.790001	1	0.00331126	0.00346021	0.956954
MCF7_+E2_only_Exhausted	REACTOME_DEUBIQUITINATION	0.790001	6	0.0198675	0.0219723	0.904208
MCF7_+E2_only_Exhausted	REACTOME_TOLL_LIKE_RECEPTOR_TLR1_TLR2_CASCADE	0.795972	2	0.00662252	0.00743945	0.890189
MCF7_+E2_only_Exhausted	REACTOME_GAP_JUNCTION_TRAFFICKING_AND_REGULATION	0.801267	1	0.00331126	0.00363322	0.911384
MCF7_+E2_only_Exhausted	REACTOME_INTERLEUKIN_3_INTERLEUKIN_5_AND_GM_CSF_SIGNALING	0.801267	1	0.00331126	0.00363322	0.911384
MCF7_+E2_only_Exhausted	REACTOME_INTRA_GOLGI_TRAFFIC	0.801267	1	0.00331126	0.00363322	0.911384
MCF7_+E2_only_Exhausted	REACTOME_ROS_AND_RNS_PRODUCTION_IN_PHAGOCYTES	0.801267	1	0.00331126	0.00363322	0.911384
MCF7_+E2_only_Exhausted	REACTOME_C_TYPE_LECTIN_RECEPTORS_CLRS_	0.801449	3	0.00993377	0.0114187	0.869958
MCF7_+E2_only_Exhausted	REACTOME_TCF_DEPENDENT_SIGNALING_IN_RESPONSE_TO_WNT	0.804867	4	0.013245	0.0152249	0.869958
MCF7_+E2_only_Exhausted	REACTOME_APOPTOTIC_CLEAVAGE_OF_CELLULAR_PROTEINS	0.807756	1	0.00331126	0.00380623	0.869958
MCF7_+E2_only_Exhausted	REACTOME_COPI_INDEPENDENT_GOLGI_TO_ER_RETROGRADE_TRAFFIC	0.807756	1	0.00331126	0.00380623	0.869958
MCF7_+E2_only_Exhausted	REACTOME_HSF1_DEPENDENT_TRANSACTIVATION	0.807756	1	0.00331126	0.00380623	0.869958
MCF7_+E2_only_Exhausted	REACTOME_ION_HOMEOSTASIS	0.807756	1	0.00331126	0.00380623	0.869958
MCF7_+E2_only_Exhausted	REACTOME_NEGATIVE_REGULATION_OF_MAPK_PATHWAY	0.807756	1	0.00331126	0.00380623	0.869958
MCF7_+E2_only_Exhausted	HALLMARK_UV_RESPONSE_DN	0.808798	3	0.00993377	0.0117647	0.844371
MCF7_+E2_only_Exhausted	REACTOME_ER_TO_GOLGI_ANTEROGRADE_TRANSPORT	0.808798	3	0.00993377	0.0119377	0.832134
MCF7_+E2_only_Exhausted	REACTOME_GABA_RECEPTOR_ACTIVATION	0.808798	1	0.00331126	0.00397924	0.832134
MCF7_+E2_only_Exhausted	REACTOME_GLUCAGON_LIKE_PEPTIDE_1_GLP1_REGULATES_INSULIN_SECRETION	0.808798	1	0.00331126	0.00397924	0.832134
MCF7_+E2_only_Exhausted	REACTOME_SIGNALING_BY_FGFR1_IN_DISEASE	0.808798	1	0.00331126	0.00397924	0.832134
MCF7_+E2_only_Exhausted	REACTOME_SIGNALING_BY_FGFR2_IN_DISEASE	0.808798	1	0.00331126	0.00397924	0.832134
MCF7_+E2_only_Exhausted	REACTOME_UNFOLDED_PROTEIN_RESPONSE_UPR_	0.808798	2	0.00662252	0.00813149	0.814429
MCF7_+E2_only_Exhausted	REACTOME_DEVELOPMENTAL_BIOLOGY	0.808798	20	0.0662252	0.0731834	0.904921
MCF7_+E2_only_Exhausted	REACTOME_NEUROTRANSMITTER_RECEPTORS_AND_POSTSYNAPTIC_SIGNAL_TRANSMISSION	0.808798	4	0.013245	0.015917	0.832134
MCF7_+E2_only_Exhausted	REACTOME_SIGNALING_BY_NOTCH	0.808798	4	0.013245	0.015917	0.832134
MCF7_+E2_only_Exhausted	REACTOME_SIGNALING_BY_FGFR	0.808798	2	0.00662252	0.0083045	0.797461
MCF7_+E2_only_Exhausted	REACTOME_SIGNALING_BY_TGFB_FAMILY_MEMBERS	0.808798	2	0.00662252	0.0083045	0.797461
MCF7_+E2_only_Exhausted	REACTOME_UCH_PROTEINASES	0.808798	2	0.00662252	0.0083045	0.797461
MCF7_+E2_only_Exhausted	HALLMARK_ESTROGEN_RESPONSE_LATE	0.808798	4	0.013245	0.01609	0.823186
MCF7_+E2_only_Exhausted	REACTOME_G_ALPHA_Z_SIGNALLING_EVENTS	0.808798	1	0.00331126	0.00415225	0.797461
MCF7_+E2_only_Exhausted	REACTOME_RET_SIGNALING	0.808798	1	0.00331126	0.00415225	0.797461
MCF7_+E2_only_Exhausted	REACTOME_RETROGRADE_TRANSPORT_AT_THE_TRANS_GOLGI_NETWORK	0.808798	1	0.00331126	0.00415225	0.797461
MCF7_+E2_only_Exhausted	REACTOME_SIGNALING_BY_NOTCH3	0.808798	1	0.00331126	0.00415225	0.797461
MCF7_+E2_only_Exhausted	REACTOME_BIOLOGICAL_OXIDATIONS	0.808798	3	0.00993377	0.0122837	0.808693
MCF7_+E2_only_Exhausted	REACTOME_FLT3_SIGNALING	0.809343	6	0.0198675	0.0237024	0.838208
MCF7_+E2_only_Exhausted	REACTOME_SIGNALING_BY_NUCLEAR_RECEPTORS	0.809343	5	0.0165563	0.0200692	0.82496
MCF7_+E2_only_Exhausted	HALLMARK_ANDROGEN_RESPONSE	0.809343	2	0.00662252	0.00847751	0.781187
MCF7_+E2_only_Exhausted	REACTOME_INTERLEUKIN_1_SIGNALING	0.809343	2	0.00662252	0.00847751	0.781187
MCF7_+E2_only_Exhausted	REACTOME_TNFR2_NON_CANONICAL_NF_KB_PATHWAY	0.809343	2	0.00662252	0.00847751	0.781187
MCF7_+E2_only_Exhausted	REACTOME_CROSS_PRESENTATION_OF_SOLUBLE_EXOGENOUS_ANTIGENS_ENDOSOMES_	0.812974	1	0.00331126	0.00432526	0.765563
MCF7_+E2_only_Exhausted	REACTOME_POST_TRANSLATIONAL_PROTEIN_MODIFICATION	0.816748	30	0.0993377	0.109516	0.907065
MCF7_+E2_only_Exhausted	REACTOME_DISEASES_OF_SIGNAL_TRANSDUCTION_BY_GROWTH_FACTOR_RECEPTORS_AND_SECOND_MESSENGERS	0.816748	9	0.0298013	0.0354671	0.840252
MCF7_+E2_only_Exhausted	REACTOME_HSP90_CHAPERONE_CYCLE_FOR_STEROID_HORMONE_RECEPTORS_SHR_	0.816748	1	0.00331126	0.00449827	0.736118
MCF7_+E2_only_Exhausted	REACTOME_TBC_RABGAPS	0.816748	1	0.00331126	0.00449827	0.736118
MCF7_+E2_only_Exhausted	REACTOME_ASPARAGINE_N_LINKED_GLYCOSYLATION	0.816748	6	0.0198675	0.0243945	0.814429
MCF7_+E2_only_Exhausted	REACTOME_GOLGI_TO_ER_RETROGRADE_TRANSPORT	0.816748	2	0.00662252	0.00882353	0.750552
MCF7_+E2_only_Exhausted	REACTOME_OPIOID_SIGNALLING	0.816748	2	0.00662252	0.00882353	0.750552
MCF7_+E2_only_Exhausted	HALLMARK_GLYCOLYSIS	0.816748	4	0.013245	0.016955	0.781187
MCF7_+E2_only_Exhausted	REACTOME_SIGNALING_BY_THE_B_CELL_RECEPTOR_BCR_	0.816748	2	0.00662252	0.00899654	0.736118
MCF7_+E2_only_Exhausted	REACTOME_DEGRADATION_OF_AXIN	0.816748	1	0.00331126	0.00467128	0.708855
MCF7_+E2_only_Exhausted	REACTOME_IRE1ALPHA_ACTIVATES_CHAPERONES	0.816748	1	0.00331126	0.00467128	0.708855
MCF7_+E2_only_Exhausted	REACTOME_POSITIVE_EPIGENETIC_REGULATION_OF_RRNA_EXPRESSION	0.816748	1	0.00331126	0.00467128	0.708855
MCF7_+E2_only_Exhausted	REACTOME_REGULATION_OF_RUNX3_EXPRESSION_AND_ACTIVITY	0.816748	1	0.00331126	0.00467128	0.708855
MCF7_+E2_only_Exhausted	REACTOME_STABILIZATION_OF_P53	0.816748	1	0.00331126	0.00467128	0.708855
MCF7_+E2_only_Exhausted	REACTOME_TCR_SIGNALING	0.820034	2	0.00662252	0.00916955	0.722229
MCF7_+E2_only_Exhausted	HALLMARK_TGF_BETA_SIGNALING	0.820034	1	0.00331126	0.00484429	0.683538
MCF7_+E2_only_Exhausted	REACTOME_APOPTOTIC_EXECUTION_PHASE	0.820034	1	0.00331126	0.00484429	0.683538
MCF7_+E2_only_Exhausted	REACTOME_RAB_GERANYLGERANYLATION	0.820034	1	0.00331126	0.00484429	0.683538
MCF7_+E2_only_Exhausted	REACTOME_TRANSCRIPTIONAL_REGULATION_BY_MECP2	0.820034	1	0.00331126	0.00484429	0.683538
MCF7_+E2_only_Exhausted	REACTOME_NERVOUS_SYSTEM_DEVELOPMENT	0.820034	12	0.0397351	0.0474048	0.838208
MCF7_+E2_only_Exhausted	REACTOME_CLEC7A_DECTIN_1_SIGNALING	0.820867	2	0.00662252	0.00934256	0.708855
MCF7_+E2_only_Exhausted	REACTOME_ANTIGEN_PROCESSING_UBIQUITINATION_PROTEASOME_DEGRADATION	0.820867	6	0.0198675	0.0252595	0.786537
MCF7_+E2_only_Exhausted	REACTOME_AUF1_HNRNP_D0_BINDS_AND_DESTABILIZES_MRNA	0.82094	1	0.00331126	0.0050173	0.659968
MCF7_+E2_only_Exhausted	REACTOME_DEGRADATION_OF_DVL	0.82094	1	0.00331126	0.0050173	0.659968
MCF7_+E2_only_Exhausted	REACTOME_NUCLEAR_RECEPTOR_TRANSCRIPTION_PATHWAY	0.82094	1	0.00331126	0.0050173	0.659968
MCF7_+E2_only_Exhausted	REACTOME_PLASMA_LIPOPROTEIN_ASSEMBLY_REMODELING_AND_CLEARANCE	0.82094	1	0.00331126	0.0050173	0.659968
MCF7_+E2_only_Exhausted	REACTOME_SIGNALING_BY_INTERLEUKINS	0.823889	8	0.0264901	0.033218	0.797461
MCF7_+E2_only_Exhausted	HALLMARK_PEROXISOME	0.825411	2	0.00662252	0.00968858	0.683538
MCF7_+E2_only_Exhausted	Mutated_Any_Multiple	0.825411	6	0.0198675	0.0257785	0.770701
MCF7_+E2_only_Exhausted	REACTOME_AMINO_ACIDS_REGULATE_MTORC1	0.825441	1	0.00331126	0.00519031	0.637969
MCF7_+E2_only_Exhausted	REACTOME_ADORA2B_MEDIATED_ANTI_INFLAMMATORY_CYTOKINES_PRODUCTION	0.826704	2	0.00662252	0.00986159	0.671546
MCF7_+E2_only_Exhausted	REACTOME_CLASS_I_MHC_MEDIATED_ANTIGEN_PROCESSING_PRESENTATION	0.826704	7	0.0231788	0.0299308	0.774413
MCF7_+E2_only_Exhausted	REACTOME_IRON_UPTAKE_AND_TRANSPORT	0.826704	1	0.00331126	0.00536332	0.617389
MCF7_+E2_only_Exhausted	REACTOME_PARASITE_INFECTION	0.826704	1	0.00331126	0.00536332	0.617389
MCF7_+E2_only_Exhausted	REACTOME_CELLULAR_SENESCENCE	0.826704	2	0.00662252	0.0100346	0.659968
MCF7_+E2_only_Exhausted	HALLMARK_XENOBIOTIC_METABOLISM	0.826704	3	0.00993377	0.0143599	0.691774
MCF7_+E2_only_Exhausted	REACTOME_RHO_GTPASE_EFFECTORS	0.826704	5	0.0165563	0.0224913	0.736118
MCF7_+E2_only_Exhausted	REACTOME_TRANSCRIPTIONAL_REGULATION_BY_RUNX2	0.826704	2	0.00662252	0.0102076	0.648782
MCF7_+E2_only_Exhausted	HALLMARK_HEME_METABOLISM	0.826704	3	0.00993377	0.0147059	0.675497
MCF7_+E2_only_Exhausted	HALLMARK_P53_PATHWAY	0.826704	4	0.013245	0.0188581	0.702351
MCF7_+E2_only_Exhausted	REACTOME_CHROMATIN_MODIFYING_ENZYMES	0.826704	4	0.013245	0.0188581	0.702351
MCF7_+E2_only_Exhausted	REACTOME_BIOSYNTHESIS_OF_THE_N_GLYCAN_PRECURSOR_DOLICHOL_LIPID_LINKED_OLIGOSACCHARIDE_LLO_AND_TRANSFER_TO_A_NASCENT_PROTEIN	0.826704	1	0.00331126	0.00570934	0.579972
MCF7_+E2_only_Exhausted	REACTOME_CA2_PATHWAY	0.826704	1	0.00331126	0.00570934	0.579972
MCF7_+E2_only_Exhausted	REACTOME_DEFECTIVE_CFTR_CAUSES_CYSTIC_FIBROSIS	0.826704	1	0.00331126	0.00570934	0.579972
MCF7_+E2_only_Exhausted	REACTOME_NRAGE_SIGNALS_DEATH_THROUGH_JNK	0.826704	1	0.00331126	0.00570934	0.579972
MCF7_+E2_only_Exhausted	REACTOME_REGULATION_OF_PTEN_GENE_TRANSCRIPTION	0.826704	1	0.00331126	0.00570934	0.579972
MCF7_+E2_only_Exhausted	REACTOME_REGULATION_OF_RAS_BY_GAPS	0.826704	1	0.00331126	0.00570934	0.579972
MCF7_+E2_only_Exhausted	REACTOME_ASYMMETRIC_LOCALIZATION_OF_PCP_PROTEINS	0.827668	1	0.00331126	0.00588235	0.562914
MCF7_+E2_only_Exhausted	REACTOME_EXTRA_NUCLEAR_ESTROGEN_SIGNALING	0.827668	1	0.00331126	0.00588235	0.562914
MCF7_+E2_only_Exhausted	REACTOME_RESPONSE_TO_ELEVATED_PLATELET_CYTOSOLIC_CA2_	0.827668	2	0.00662252	0.0107266	0.617389
MCF7_+E2_only_Exhausted	REACTOME_TOLL_LIKE_RECEPTOR_4_TLR4_CASCADE	0.827668	2	0.00662252	0.0107266	0.617389
MCF7_+E2_only_Exhausted	REACTOME_PHASE_II_CONJUGATION_OF_COMPOUNDS	0.827668	1	0.00331126	0.00605536	0.546831
MCF7_+E2_only_Exhausted	REACTOME_INTERLEUKIN_1_FAMILY_SIGNALING	0.827668	2	0.00662252	0.0108997	0.60759
MCF7_+E2_only_Exhausted	REACTOME_METABOLISM_OF_WATER_SOLUBLE_VITAMINS_AND_COFACTORS	0.827668	2	0.00662252	0.0108997	0.60759
MCF7_+E2_only_Exhausted	REACTOME_RAB_REGULATION_OF_TRAFFICKING	0.827668	2	0.00662252	0.0108997	0.60759
MCF7_+E2_only_Exhausted	REACTOME_SIGNALING_BY_WNT	0.827668	5	0.0165563	0.0237024	0.698506
MCF7_+E2_only_Exhausted	REACTOME_FC_EPSILON_RECEPTOR_FCERI_SIGNALING	0.827668	2	0.00662252	0.0110727	0.598096
MCF7_+E2_only_Exhausted	REACTOME_HEDGEHOG_LIGAND_BIOGENESIS	0.827668	1	0.00331126	0.00622837	0.531641
MCF7_+E2_only_Exhausted	REACTOME_INTERLEUKIN_17_SIGNALING	0.827668	1	0.00331126	0.00622837	0.531641
MCF7_+E2_only_Exhausted	REACTOME_PROGRAMMED_CELL_DEATH	0.827668	3	0.00993377	0.0155709	0.637969
MCF7_+E2_only_Exhausted	HALLMARK_FATTY_ACID_METABOLISM	0.827668	2	0.00662252	0.0112457	0.588895
MCF7_+E2_only_Exhausted	HALLMARK_CHOLESTEROL_HOMEOSTASIS	0.827668	1	0.00331126	0.00640138	0.517272
MCF7_+E2_only_Exhausted	REACTOME_ABC_TRANSPORTER_DISORDERS	0.827668	1	0.00331126	0.00640138	0.517272
MCF7_+E2_only_Exhausted	REACTOME_CELLULAR_RESPONSE_TO_HYPOXIA	0.827668	1	0.00331126	0.00640138	0.517272
MCF7_+E2_only_Exhausted	REACTOME_REGULATION_OF_PTEN_STABILITY_AND_ACTIVITY	0.827668	1	0.00331126	0.00640138	0.517272
MCF7_+E2_only_Exhausted	REACTOME_TRANSLOCATION_OF_SLC2A4_GLUT4_TO_THE_PLASMA_MEMBRANE	0.827668	1	0.00331126	0.00640138	0.517272
MCF7_+E2_only_Exhausted	HALLMARK_HYPOXIA	0.834104	3	0.00993377	0.01609	0.617389
MCF7_+E2_only_Exhausted	REACTOME_CELL_DEATH_SIGNALLING_VIA_NRAGE_NRIF_AND_NADE	0.837799	1	0.00331126	0.0067474	0.490745
MCF7_+E2_only_Exhausted	REACTOME_CELL_JUNCTION_ORGANIZATION	0.843126	1	0.00331126	0.00709343	0.466807
MCF7_+E2_only_Exhausted	REACTOME_VISUAL_PHOTOTRANSDUCTION	0.843126	1	0.00331126	0.00709343	0.466807
MCF7_+E2_only_Exhausted	REACTOME_TRANSCRIPTIONAL_REGULATION_BY_RUNX1	0.843126	3	0.00993377	0.016955	0.58589
MCF7_+E2_only_Exhausted	REACTOME_G_ALPHA_12_13_SIGNALLING_EVENTS	0.843126	1	0.00331126	0.00726644	0.455692
MCF7_+E2_only_Exhausted	REACTOME_METABOLISM_OF_NUCLEOTIDES	0.843126	1	0.00331126	0.00726644	0.455692
MCF7_+E2_only_Exhausted	HALLMARK_UV_RESPONSE_UP	0.843126	2	0.00662252	0.0124567	0.531641
MCF7_+E2_only_Exhausted	REACTOME_TOLL_LIKE_RECEPTOR_CASCADES	0.843126	2	0.00662252	0.0124567	0.531641
MCF7_+E2_only_Exhausted	REACTOME_SIGNALING_BY_RHO_GTPASES	0.843126	7	0.0231788	0.034083	0.680069
MCF7_+E2_only_Exhausted	REACTOME_REGULATION_OF_INSULIN_SECRETION	0.843126	1	0.00331126	0.00743945	0.445095
MCF7_+E2_only_Exhausted	REACTOME_ANTI_INFLAMMATORY_RESPONSE_FAVOURING_LEISHMANIA_PARASITE_INFECTION	0.843126	2	0.00662252	0.0128028	0.517272
MCF7_+E2_only_Exhausted	REACTOME_BETA_CATENIN_INDEPENDENT_WNT_SIGNALING	0.843126	2	0.00662252	0.0128028	0.517272
MCF7_+E2_only_Exhausted	REACTOME_RHO_GTPASE_CYCLE	0.843126	2	0.00662252	0.0128028	0.517272
MCF7_+E2_only_Exhausted	REACTOME_TRANSMISSION_ACROSS_CHEMICAL_SYNAPSES	0.843126	4	0.013245	0.0221453	0.598096
MCF7_+E2_only_Exhausted	REACTOME_CARGO_RECOGNITION_FOR_CLATHRIN_MEDIATED_ENDOCYTOSIS	0.843126	1	0.00331126	0.00778547	0.425313
MCF7_+E2_only_Exhausted	REACTOME_HATS_ACETYLATE_HISTONES	0.843126	1	0.00331126	0.00778547	0.425313
MCF7_+E2_only_Exhausted	REACTOME_PLATELET_HOMEOSTASIS	0.843126	1	0.00331126	0.00778547	0.425313
MCF7_+E2_only_Exhausted	REACTOME_ANTIGEN_PROCESSING_CROSS_PRESENTATION	0.843126	1	0.00331126	0.00813149	0.407214
MCF7_+E2_only_Exhausted	REACTOME_COPI_MEDIATED_ANTEROGRADE_TRANSPORT	0.843126	1	0.00331126	0.00813149	0.407214
MCF7_+E2_only_Exhausted	REACTOME_FCGAMMA_RECEPTOR_FCGR_DEPENDENT_PHAGOCYTOSIS	0.843126	1	0.00331126	0.00813149	0.407214
MCF7_+E2_only_Exhausted	REACTOME_P75_NTR_RECEPTOR_MEDIATED_SIGNALLING	0.843126	1	0.00331126	0.00813149	0.407214
MCF7_+E2_only_Exhausted	REACTOME_PCP_CE_PATHWAY	0.843126	1	0.00331126	0.00813149	0.407214
MCF7_+E2_only_Exhausted	REACTOME_PTEN_REGULATION	0.843126	2	0.00662252	0.0134948	0.490745
MCF7_+E2_only_Exhausted	REACTOME_MYD88_INDEPENDENT_TLR4_CASCADE_	0.843533	1	0.00331126	0.0083045	0.398731
MCF7_+E2_only_Exhausted	REACTOME_HEMOSTASIS	0.843533	9	0.0298013	0.0442907	0.672858
MCF7_+E2_only_Exhausted	REACTOME_DISEASES_OF_METABOLISM	0.843533	3	0.00993377	0.0186851	0.531641
MCF7_+E2_only_Exhausted	REACTOME_ABC_FAMILY_PROTEINS_MEDIATED_TRANSPORT	0.843533	1	0.00331126	0.00847751	0.390593
MCF7_+E2_only_Exhausted	REACTOME_NEDDYLATION	0.843533	3	0.00993377	0.0188581	0.526763
MCF7_+E2_only_Exhausted	REACTOME_CELL_SURFACE_INTERACTIONS_AT_THE_VASCULAR_WALL	0.843533	1	0.00331126	0.00882353	0.375276
MCF7_+E2_only_Exhausted	REACTOME_L1CAM_INTERACTIONS	0.843533	1	0.00331126	0.00882353	0.375276
MCF7_+E2_only_Exhausted	HALLMARK_TNFA_SIGNALING_VIA_NFKB	0.843533	2	0.00662252	0.0143599	0.461182
MCF7_+E2_only_Exhausted	REACTOME_LEISHMANIA_INFECTION	0.843533	3	0.00993377	0.0195502	0.508117
MCF7_+E2_only_Exhausted	HALLMARK_COMPLEMENT	0.843533	2	0.00662252	0.0147059	0.450331
MCF7_+E2_only_Exhausted	HALLMARK_BILE_ACID_METABOLISM	0.843533	1	0.00331126	0.00934256	0.354427
MCF7_+E2_only_Exhausted	REACTOME_CELL_CELL_COMMUNICATION	0.843533	1	0.00331126	0.00951557	0.347983
MCF7_+E2_only_Exhausted	HALLMARK_MYOGENESIS	0.843533	2	0.00662252	0.0152249	0.434979
MCF7_+E2_only_Exhausted	HALLMARK_PI3K_AKT_MTOR_SIGNALING	0.843533	1	0.00331126	0.00986159	0.335773
MCF7_+E2_only_Exhausted	HALLMARK_COAGULATION	0.843533	1	0.00331126	0.0102076	0.324391
MCF7_+E2_only_Exhausted	REACTOME_SIGNALING_BY_VEGF	0.843533	1	0.00331126	0.0102076	0.324391
MCF7_+E2_only_Exhausted	REACTOME_METABOLISM_OF_VITAMINS_AND_COFACTORS	0.843533	2	0.00662252	0.01609	0.411593
MCF7_+E2_only_Exhausted	REACTOME_DISEASES_OF_GLYCOSYLATION	0.843533	1	0.00331126	0.0103806	0.318985
MCF7_+E2_only_Exhausted	REACTOME_NEURONAL_SYSTEM	0.843533	5	0.0165563	0.0309689	0.534611
MCF7_+E2_only_Exhausted	REACTOME_ADAPTIVE_IMMUNE_SYSTEM	0.843533	10	0.0331126	0.0529412	0.62546
MCF7_+E2_only_Exhausted	REACTOME_CARDIAC_CONDUCTION	0.843533	1	0.00331126	0.0108997	0.303795
MCF7_+E2_only_Exhausted	REACTOME_METABOLISM_OF_LIPIDS	0.843533	11	0.0364238	0.0584775	0.622869
MCF7_+E2_only_Exhausted	REACTOME_CLATHRIN_MEDIATED_ENDOCYTOSIS	0.843533	1	0.00331126	0.0119377	0.277378
MCF7_+E2_only_Exhausted	HALLMARK_APOPTOSIS	0.843533	1	0.00331126	0.0121107	0.273415
MCF7_+E2_only_Exhausted	HALLMARK_ALLOGRAFT_REJECTION	0.843533	1	0.00331126	0.0122837	0.269564
MCF7_+E2_only_Exhausted	REACTOME_DEATH_RECEPTOR_SIGNALLING	0.843533	1	0.00331126	0.0124567	0.26582
MCF7_+E2_only_Exhausted	HALLMARK_INFLAMMATORY_RESPONSE	0.843533	1	0.00331126	0.0131488	0.25183
MCF7_+E2_only_Exhausted	REACTOME_INTRACELLULAR_SIGNALING_BY_SECOND_MESSENGERS	0.843533	4	0.013245	0.0302768	0.437465
MCF7_+E2_only_Exhausted	REACTOME_G_ALPHA_I_SIGNALLING_EVENTS	0.843533	3	0.00993377	0.0257785	0.38535
MCF7_+E2_only_Exhausted	REACTOME_G_ALPHA_S_SIGNALLING_EVENTS	0.843533	1	0.00331126	0.0140138	0.236285
MCF7_+E2_only_Exhausted	HALLMARK_KRAS_SIGNALING_UP	0.843533	1	0.00331126	0.0141869	0.233403
MCF7_+E2_only_Exhausted	REACTOME_FATTY_ACID_METABOLISM	0.843533	1	0.00331126	0.0141869	0.233403
MCF7_+E2_only_Exhausted	HALLMARK_IL2_STAT5_SIGNALING	0.843533	1	0.00331126	0.0150519	0.219989
MCF7_+E2_only_Exhausted	REACTOME_MEMBRANE_TRAFFICKING	0.843533	8	0.0264901	0.0524221	0.505322
MCF7_+E2_only_Exhausted	REACTOME_PLATELET_ACTIVATION_SIGNALING_AND_AGGREGATION	0.843533	2	0.00662252	0.0221453	0.299048
MCF7_+E2_only_Exhausted	HALLMARK_APICAL_JUNCTION	0.843533	1	0.00331126	0.01609	0.205796
MCF7_+E2_only_Exhausted	REACTOME_MUSCLE_CONTRACTION	0.843533	1	0.00331126	0.01609	0.205796
MCF7_+E2_only_Exhausted	REACTOME_VESICLE_MEDIATED_TRANSPORT	0.843533	8	0.0264901	0.0543253	0.48762
MCF7_+E2_only_Exhausted	HALLMARK_ESTROGEN_RESPONSE_EARLY	0.843533	1	0.00331126	0.016609	0.199365
MCF7_+E2_only_Exhausted	REACTOME_EXTRACELLULAR_MATRIX_ORGANIZATION	0.843533	2	0.00662252	0.0240484	0.275382
MCF7_+E2_only_Exhausted	REACTOME_INNATE_IMMUNE_SYSTEM	0.843533	12	0.0397351	0.0742215	0.535359
MCF7_+E2_only_Exhausted	REACTOME_SIGNALING_BY_RECEPTOR_TYROSINE_KINASES	0.843533	3	0.00993377	0.0422145	0.235316
MCF7_+E2_only_Exhausted	REACTOME_TRANSPORT_OF_SMALL_MOLECULES	0.843533	5	0.0165563	0.0560554	0.295356
MCF7_+E2_only_Exhausted	LTED_Expanded	0.843533	6	0.0198675	0.0624567	0.318101
MCF7_+E2_only_Exhausted	REACTOME_NEUTROPHIL_DEGRANULATION	0.843533	2	0.00662252	0.0377163	0.175588
MCF7_+E2_only_Exhausted	REACTOME_SIGNALING_BY_GPCR	0.843533	4	0.013245	0.0570934	0.231989
MCF7_-E2_only_Exhausted	MCF7_-E2_Exhausted	1.67889e-78	56	1	0.0416955	23.9834
MCF7_-E2_only_Exhausted	LTED_Exhausted	3.26538e-09	28	0.5	0.131315	3.80764
MCF7_-E2_only_Exhausted	Essential_Genes	0.0488078	27	0.482143	0.271453	1.77615
MCF7_-E2_only_Exhausted	Mutated_Any_Single	0.140443	17	0.303571	0.148097	2.04982
MCF7_-E2_only_Exhausted	REACTOME_DEADENYLATION_OF_MRNA	0.28771	2	0.0357143	0.00207612	17.2024
MCF7_-E2_only_Exhausted	REACTOME_STABILIZATION_OF_P53	0.506976	2	0.0357143	0.00467128	7.6455
MCF7_-E2_only_Exhausted	REACTOME_DEADENYLATION_DEPENDENT_MRNA_DECAY	0.506976	2	0.0357143	0.00484429	7.37245
MCF7_-E2_only_Exhausted	REACTOME_AUF1_HNRNP_D0_BINDS_AND_DESTABILIZES_MRNA	0.506976	2	0.0357143	0.0050173	7.11823
MCF7_-E2_only_Exhausted	REACTOME_IRON_UPTAKE_AND_TRANSPORT	0.506976	2	0.0357143	0.00536332	6.65899
MCF7_-E2_only_Exhausted	REACTOME_COPI_DEPENDENT_GOLGI_TO_ER_RETROGRADE_TRAFFIC	0.506976	2	0.0357143	0.00570934	6.25541
MCF7_-E2_only_Exhausted	REACTOME_G1_S_DNA_DAMAGE_CHECKPOINTS	0.506976	2	0.0357143	0.00570934	6.25541
MCF7_-E2_only_Exhausted	REACTOME_HEDGEHOG_LIGAND_BIOGENESIS	0.506976	2	0.0357143	0.00622837	5.73413
MCF7_-E2_only_Exhausted	REACTOME_SIGNALING_BY_TGF_BETA_RECEPTOR_COMPLEX	0.506976	2	0.0357143	0.00622837	5.73413
MCF7_-E2_only_Exhausted	REACTOME_INTRA_GOLGI_AND_RETROGRADE_GOLGI_TO_ER_TRAFFIC	0.506976	3	0.0535714	0.0145329	3.68622
MCF7_-E2_only_Exhausted	REACTOME_CYTOSOLIC_IRON_SULFUR_CLUSTER_ASSEMBLY	0.506976	1	0.0178571	0.000865052	20.6429
MCF7_-E2_only_Exhausted	REACTOME_DEX_H_BOX_HELICASES_ACTIVATE_TYPE_I_IFN_AND_INFLAMMATORY_CYTOKINES_PRODUCTION_	0.506976	1	0.0178571	0.000865052	20.6429
MCF7_-E2_only_Exhausted	REACTOME_OXIDATIVE_STRESS_INDUCED_SENESCENCE	0.506976	2	0.0357143	0.00657439	5.43233
MCF7_-E2_only_Exhausted	REACTOME_TCF_DEPENDENT_SIGNALING_IN_RESPONSE_TO_WNT	0.506976	3	0.0535714	0.0152249	3.51867
MCF7_-E2_only_Exhausted	REACTOME_UB_SPECIFIC_PROCESSING_PROTEASES	0.506976	3	0.0535714	0.0152249	3.51867
MCF7_-E2_only_Exhausted	REACTOME_HEDGEHOG_ON_STATE	0.506976	2	0.0357143	0.00726644	4.91497
MCF7_-E2_only_Exhausted	REACTOME_ACTIVATION_OF_SMO	0.506976	1	0.0178571	0.00121107	14.7449
MCF7_-E2_only_Exhausted	REACTOME_DOWNREGULATION_OF_ERBB2_ERBB3_SIGNALING	0.506976	1	0.0178571	0.00121107	14.7449
MCF7_-E2_only_Exhausted	REACTOME_PURINE_RIBONUCLEOSIDE_MONOPHOSPHATE_BIOSYNTHESIS	0.506976	1	0.0178571	0.00121107	14.7449
MCF7_-E2_only_Exhausted	REACTOME_RESOLUTION_OF_D_LOOP_STRUCTURES_THROUGH_SYNTHESIS_DEPENDENT_STRAND_ANNEALING_SDSA_	0.506976	1	0.0178571	0.00121107	14.7449
MCF7_-E2_only_Exhausted	REACTOME_SUPPRESSION_OF_PHAGOSOMAL_MATURATION	0.506976	1	0.0178571	0.00121107	14.7449
MCF7_-E2_only_Exhausted	REACTOME_GLYCOGEN_STORAGE_DISEASES	0.506976	1	0.0178571	0.00138408	12.9018
MCF7_-E2_only_Exhausted	REACTOME_GLYCOGEN_SYNTHESIS	0.506976	1	0.0178571	0.00138408	12.9018
MCF7_-E2_only_Exhausted	REACTOME_NEF_MEDIATES_DOWN_MODULATION_OF_CELL_SURFACE_RECEPTORS_BY_RECRUITING_THEM_TO_CLATHRIN_ADAPTERS	0.506976	1	0.0178571	0.00138408	12.9018
MCF7_-E2_only_Exhausted	REACTOME_REGULATION_OF_TP53_ACTIVITY_THROUGH_METHYLATION	0.506976	1	0.0178571	0.00138408	12.9018
MCF7_-E2_only_Exhausted	REACTOME_SIGNALING_BY_TGFB_FAMILY_MEMBERS	0.506976	2	0.0357143	0.0083045	4.3006
MCF7_-E2_only_Exhausted	HALLMARK_ANDROGEN_RESPONSE	0.506976	2	0.0357143	0.00847751	4.21283
MCF7_-E2_only_Exhausted	REACTOME_TNFR2_NON_CANONICAL_NF_KB_PATHWAY	0.506976	2	0.0357143	0.00847751	4.21283
MCF7_-E2_only_Exhausted	REACTOME_RESOLUTION_OF_D_LOOP_STRUCTURES	0.506976	1	0.0178571	0.00155709	11.4683
MCF7_-E2_only_Exhausted	REACTOME_TNF_RECEPTOR_SUPERFAMILY_TNFSF_MEMBERS_MEDIATING_NON_CANONICAL_NF_KB_PATHWAY	0.506976	1	0.0178571	0.00155709	11.4683
MCF7_-E2_only_Exhausted	REACTOME_TP53_REGULATES_TRANSCRIPTION_OF_ADDITIONAL_CELL_CYCLE_GENES_WHOSE_EXACT_ROLE_IN_THE_P53_PATHWAY_REMAIN_UNCERTAIN	0.506976	1	0.0178571	0.00155709	11.4683
MCF7_-E2_only_Exhausted	REACTOME_REGULATION_OF_MRNA_STABILITY_BY_PROTEINS_THAT_BIND_AU_RICH_ELEMENTS	0.506976	2	0.0357143	0.00865052	4.12857
MCF7_-E2_only_Exhausted	REACTOME_GOLGI_TO_ER_RETROGRADE_TRANSPORT	0.506976	2	0.0357143	0.00882353	4.04762
MCF7_-E2_only_Exhausted	REACTOME_METABOLISM_OF_RNA	0.506976	6	0.107143	0.0557093	1.92325
MCF7_-E2_only_Exhausted	REACTOME_MITOCHONDRIAL_IRON_SULFUR_CLUSTER_BIOGENESIS	0.506976	1	0.0178571	0.0017301	10.3214
MCF7_-E2_only_Exhausted	REACTOME_NUCLEOBASE_BIOSYNTHESIS	0.506976	1	0.0178571	0.0017301	10.3214
MCF7_-E2_only_Exhausted	REACTOME_TELOMERE_EXTENSION_BY_TELOMERASE	0.506976	1	0.0178571	0.0017301	10.3214
MCF7_-E2_only_Exhausted	REACTOME_MTORC1_MEDIATED_SIGNALLING	0.506976	1	0.0178571	0.00190311	9.38312
MCF7_-E2_only_Exhausted	REACTOME_REGULATION_OF_FZD_BY_UBIQUITINATION	0.506976	1	0.0178571	0.00190311	9.38312
MCF7_-E2_only_Exhausted	REACTOME_RHO_GTPASES_ACTIVATE_IQGAPS	0.506976	1	0.0178571	0.00190311	9.38312
MCF7_-E2_only_Exhausted	REACTOME_VXPX_CARGO_TARGETING_TO_CILIUM	0.506976	1	0.0178571	0.00190311	9.38312
MCF7_-E2_only_Exhausted	REACTOME_PROCESSING_OF_CAPPED_INTRON_CONTAINING_PRE_MRNA	0.506976	3	0.0535714	0.0204152	2.62409
MCF7_-E2_only_Exhausted	REACTOME_CELLULAR_SENESCENCE	0.506976	2	0.0357143	0.0100346	3.55911
MCF7_-E2_only_Exhausted	REACTOME_NEGATIVE_REGULATION_OF_MET_ACTIVITY	0.506976	1	0.0178571	0.00207612	8.60119
MCF7_-E2_only_Exhausted	REACTOME_TRP_CHANNELS	0.506976	1	0.0178571	0.00207612	8.60119
MCF7_-E2_only_Exhausted	HALLMARK_UNFOLDED_PROTEIN_RESPONSE	0.506976	2	0.0357143	0.0102076	3.49879
MCF7_-E2_only_Exhausted	REACTOME_RESPONSE_OF_MTB_TO_PHAGOCYTOSIS	0.506976	1	0.0178571	0.00224913	7.93956
MCF7_-E2_only_Exhausted	REACTOME_SUMOYLATION_OF_DNA_METHYLATION_PROTEINS	0.506976	1	0.0178571	0.00224913	7.93956
MCF7_-E2_only_Exhausted	REACTOME_THE_ROLE_OF_NEF_IN_HIV_1_REPLICATION_AND_DISEASE_PATHOGENESIS	0.506976	1	0.0178571	0.00224913	7.93956
MCF7_-E2_only_Exhausted	REACTOME_HOST_INTERACTIONS_OF_HIV_FACTORS	0.506976	2	0.0357143	0.0107266	3.32949
MCF7_-E2_only_Exhausted	REACTOME_SIGNALING_BY_RHO_GTPASES	0.506976	4	0.0714286	0.034083	2.09572
MCF7_-E2_only_Exhausted	REACTOME_DEUBIQUITINATION	0.506976	3	0.0535714	0.0219723	2.43813
MCF7_-E2_only_Exhausted	REACTOME_DOWNREGULATION_OF_TGF_BETA_RECEPTOR_SIGNALING	0.506976	1	0.0178571	0.00242215	7.37245
MCF7_-E2_only_Exhausted	REACTOME_GLYCOGEN_METABOLISM	0.506976	1	0.0178571	0.00242215	7.37245
MCF7_-E2_only_Exhausted	REACTOME_INSULIN_RECEPTOR_RECYCLING	0.506976	1	0.0178571	0.00242215	7.37245
MCF7_-E2_only_Exhausted	REACTOME_ONCOGENE_INDUCED_SENESCENCE	0.506976	1	0.0178571	0.00242215	7.37245
MCF7_-E2_only_Exhausted	REACTOME_INSULIN_PROCESSING	0.506976	1	0.0178571	0.00259516	6.88095
MCF7_-E2_only_Exhausted	REACTOME_SMAD2_SMAD3_SMAD4_HETEROTRIMER_REGULATES_TRANSCRIPTION	0.506976	1	0.0178571	0.00259516	6.88095
MCF7_-E2_only_Exhausted	REACTOME_DOWNREGULATION_OF_ERBB2_SIGNALING	0.506976	1	0.0178571	0.00276817	6.45089
MCF7_-E2_only_Exhausted	REACTOME_INFECTION_WITH_MYCOBACTERIUM_TUBERCULOSIS	0.506976	1	0.0178571	0.00276817	6.45089
MCF7_-E2_only_Exhausted	REACTOME_REGULATION_OF_TP53_ACTIVITY_THROUGH_ACETYLATION	0.506976	1	0.0178571	0.00276817	6.45089
MCF7_-E2_only_Exhausted	REACTOME_RHO_GTPASES_ACTIVATE_PAKS	0.506976	1	0.0178571	0.00276817	6.45089
MCF7_-E2_only_Exhausted	REACTOME_TRANSCRIPTIONAL_REGULATION_BY_E2F6	0.506976	1	0.0178571	0.00276817	6.45089
MCF7_-E2_only_Exhausted	REACTOME_SIGNALING_BY_WNT	0.506976	3	0.0535714	0.0237024	2.26017
MCF7_-E2_only_Exhausted	REACTOME_EXTENSION_OF_TELOMERES	0.506976	1	0.0178571	0.00294118	6.07143
MCF7_-E2_only_Exhausted	REACTOME_FORMATION_OF_THE_BETA_CATENIN_TCF_TRANSACTIVATING_COMPLEX	0.506976	1	0.0178571	0.00294118	6.07143
MCF7_-E2_only_Exhausted	REACTOME_REGULATION_OF_TP53_EXPRESSION_AND_DEGRADATION	0.506976	1	0.0178571	0.00294118	6.07143
MCF7_-E2_only_Exhausted	REACTOME_SYNTHESIS_OF_ACTIVE_UBIQUITIN_ROLES_OF_E1_AND_E2_ENZYMES	0.506976	1	0.0178571	0.00294118	6.07143
MCF7_-E2_only_Exhausted	REACTOME_TRANSFERRIN_ENDOCYTOSIS_AND_RECYCLING	0.506976	1	0.0178571	0.00294118	6.07143
MCF7_-E2_only_Exhausted	REACTOME_RHO_GTPASE_CYCLE	0.506976	2	0.0357143	0.0128028	2.78958
MCF7_-E2_only_Exhausted	REACTOME_SIGNALING_BY_HEDGEHOG	0.506976	2	0.0357143	0.0128028	2.78958
MCF7_-E2_only_Exhausted	REACTOME_COOPERATION_OF_PDCL_PHLP1_AND_TRIC_CCT_IN_G_PROTEIN_BETA_FOLDING	0.506976	1	0.0178571	0.00311419	5.73413
MCF7_-E2_only_Exhausted	REACTOME_DISEASES_OF_CARBOHYDRATE_METABOLISM	0.506976	1	0.0178571	0.00311419	5.73413
MCF7_-E2_only_Exhausted	REACTOME_ENDOSOMAL_SORTING_COMPLEX_REQUIRED_FOR_TRANSPORT_ESCRT_	0.506976	1	0.0178571	0.00311419	5.73413
MCF7_-E2_only_Exhausted	REACTOME_TGF_BETA_RECEPTOR_SIGNALING_ACTIVATES_SMADS	0.506976	1	0.0178571	0.00311419	5.73413
MCF7_-E2_only_Exhausted	REACTOME_REGULATION_OF_EXPRESSION_OF_SLITS_AND_ROBOS	0.506976	2	0.0357143	0.0129758	2.75238
MCF7_-E2_only_Exhausted	REACTOME_MEMBRANE_TRAFFICKING	0.506976	5	0.0892857	0.0524221	1.70321
MCF7_-E2_only_Exhausted	REACTOME_HDR_THROUGH_HOMOLOGOUS_RECOMBINATION_HRR_	0.506976	1	0.0178571	0.0032872	5.43233
MCF7_-E2_only_Exhausted	REACTOME_PTEN_REGULATION	0.506976	2	0.0357143	0.0134948	2.64652
MCF7_-E2_only_Exhausted	REACTOME_REGULATION_OF_TP53_ACTIVITY	0.506976	2	0.0357143	0.0134948	2.64652
MCF7_-E2_only_Exhausted	Mutated_Any_Multiple	0.506976	3	0.0535714	0.0257785	2.07814
MCF7_-E2_only_Exhausted	REACTOME_DEACTIVATION_OF_THE_BETA_CATENIN_TRANSACTIVATING_COMPLEX	0.506976	1	0.0178571	0.00346021	5.16071
MCF7_-E2_only_Exhausted	REACTOME_TRANSCRIPTIONAL_ACTIVITY_OF_SMAD2_SMAD3_SMAD4_HETEROTRIMER	0.506976	1	0.0178571	0.00346021	5.16071
MCF7_-E2_only_Exhausted	REACTOME_ION_CHANNEL_TRANSPORT	0.506976	2	0.0357143	0.0138408	2.58036
MCF7_-E2_only_Exhausted	REACTOME_ROS_AND_RNS_PRODUCTION_IN_PHAGOCYTES	0.506976	1	0.0178571	0.00363322	4.91497
MCF7_-E2_only_Exhausted	REACTOME_VESICLE_MEDIATED_TRANSPORT	0.506976	5	0.0892857	0.0543253	1.64354
MCF7_-E2_only_Exhausted	HALLMARK_E2F_TARGETS	0.506976	2	0.0357143	0.0150519	2.37274
MCF7_-E2_only_Exhausted	Mutated_metUp_Single	0.506976	5	0.0892857	0.0565744	1.5782
MCF7_-E2_only_Exhausted	REACTOME_MTOR_SIGNALLING	0.506976	1	0.0178571	0.00415225	4.3006
MCF7_-E2_only_Exhausted	REACTOME_RETROGRADE_TRANSPORT_AT_THE_TRANS_GOLGI_NETWORK	0.506976	1	0.0178571	0.00415225	4.3006
MCF7_-E2_only_Exhausted	REACTOME_TELOMERE_MAINTENANCE	0.506976	1	0.0178571	0.00415225	4.3006
MCF7_-E2_only_Exhausted	REACTOME_TP53_REGULATES_TRANSCRIPTION_OF_CELL_CYCLE_GENES	0.506976	1	0.0178571	0.00415225	4.3006
MCF7_-E2_only_Exhausted	REACTOME_CARGO_TRAFFICKING_TO_THE_PERICILIARY_MEMBRANE	0.506976	1	0.0178571	0.00432526	4.12857
MCF7_-E2_only_Exhausted	REACTOME_CROSS_PRESENTATION_OF_SOLUBLE_EXOGENOUS_ANTIGENS_ENDOSOMES_	0.506976	1	0.0178571	0.00432526	4.12857
MCF7_-E2_only_Exhausted	REACTOME_RUNX1_INTERACTS_WITH_CO_FACTORS_WHOSE_PRECISE_EFFECT_ON_RUNX1_TARGETS_IS_NOT_KNOWN	0.506976	1	0.0178571	0.00432526	4.12857
MCF7_-E2_only_Exhausted	REACTOME_SUMOYLATION_OF_TRANSCRIPTION_COFACTORS	0.506976	1	0.0178571	0.00432526	4.12857
MCF7_-E2_only_Exhausted	REACTOME_CYTOSOLIC_SENSORS_OF_PATHOGEN_ASSOCIATED_DNA_	0.506976	1	0.0178571	0.00449827	3.96978
MCF7_-E2_only_Exhausted	HALLMARK_APICAL_JUNCTION	0.506976	2	0.0357143	0.01609	2.21966
MCF7_-E2_only_Exhausted	REACTOME_CELLULAR_RESPONSES_TO_EXTERNAL_STIMULI	0.506976	4	0.0714286	0.0437716	1.63185
MCF7_-E2_only_Exhausted	REACTOME_MRNA_SPLICING	0.506976	2	0.0357143	0.016263	2.19605
MCF7_-E2_only_Exhausted	REACTOME_DEGRADATION_OF_AXIN	0.506976	1	0.0178571	0.00467128	3.82275
MCF7_-E2_only_Exhausted	REACTOME_REGULATION_OF_RUNX3_EXPRESSION_AND_ACTIVITY	0.506976	1	0.0178571	0.00467128	3.82275
MCF7_-E2_only_Exhausted	REACTOME_SUMOYLATION_OF_RNA_BINDING_PROTEINS	0.506976	1	0.0178571	0.00467128	3.82275
MCF7_-E2_only_Exhausted	HALLMARK_TGF_BETA_SIGNALING	0.506976	1	0.0178571	0.00484429	3.68622
MCF7_-E2_only_Exhausted	REACTOME_SUMOYLATION_OF_CHROMATIN_ORGANIZATION_PROTEINS	0.506976	1	0.0178571	0.00484429	3.68622
MCF7_-E2_only_Exhausted	REACTOME_TRANSCRIPTIONAL_REGULATION_BY_TP53	0.506976	3	0.0535714	0.0306228	1.74939
MCF7_-E2_only_Exhausted	REACTOME_TRANSCRIPTIONAL_REGULATION_BY_RUNX1	0.506976	2	0.0357143	0.016955	2.10641
MCF7_-E2_only_Exhausted	REACTOME_ACTIVATION_OF_THE_MRNA_UPON_BINDING_OF_THE_CAP_BINDING_COMPLEX_AND_EIFS_AND_SUBSEQUENT_BINDING_TO_43S	0.506976	1	0.0178571	0.0050173	3.55911
MCF7_-E2_only_Exhausted	REACTOME_DEGRADATION_OF_DVL	0.506976	1	0.0178571	0.0050173	3.55911
MCF7_-E2_only_Exhausted	REACTOME_HCMV_LATE_EVENTS	0.506976	1	0.0178571	0.0050173	3.55911
MCF7_-E2_only_Exhausted	HALLMARK_MYC_TARGETS_V2	0.506976	1	0.0178571	0.00519031	3.44048
MCF7_-E2_only_Exhausted	REACTOME_AMINO_ACIDS_REGULATE_MTORC1	0.506976	1	0.0178571	0.00519031	3.44048
MCF7_-E2_only_Exhausted	REACTOME_DECTIN_1_MEDIATED_NONCANONICAL_NF_KB_SIGNALING	0.506976	1	0.0178571	0.00519031	3.44048
MCF7_-E2_only_Exhausted	REACTOME_METABOLISM_OF_POLYAMINES	0.506976	1	0.0178571	0.00519031	3.44048
MCF7_-E2_only_Exhausted	REACTOME_NEGATIVE_REGULATION_OF_NOTCH4_SIGNALING	0.506976	1	0.0178571	0.00519031	3.44048
MCF7_-E2_only_Exhausted	REACTOME_SIGNALING_BY_ERBB2	0.506976	1	0.0178571	0.00519031	3.44048
MCF7_-E2_only_Exhausted	REACTOME_SIGNALING_BY_ROBO_RECEPTORS	0.506976	2	0.0357143	0.0176471	2.02381
MCF7_-E2_only_Exhausted	REACTOME_ASSEMBLY_OF_THE_PRE_REPLICATIVE_COMPLEX	0.506976	1	0.0178571	0.00536332	3.32949
MCF7_-E2_only_Exhausted	LTED_Expanded	0.506976	5	0.0892857	0.0624567	1.42956
MCF7_-E2_only_Exhausted	REACTOME_ACTIVATION_OF_ANTERIOR_HOX_GENES_IN_HINDBRAIN_DEVELOPMENT_DURING_EARLY_EMBRYOGENESIS	0.506976	1	0.0178571	0.00570934	3.12771
MCF7_-E2_only_Exhausted	REACTOME_APC_C_CDH1_MEDIATED_DEGRADATION_OF_CDC20_AND_OTHER_APC_C_CDH1_TARGETED_PROTEINS_IN_LATE_MITOSIS_EARLY_G1	0.506976	1	0.0178571	0.00570934	3.12771
MCF7_-E2_only_Exhausted	REACTOME_DEFECTIVE_CFTR_CAUSES_CYSTIC_FIBROSIS	0.506976	1	0.0178571	0.00570934	3.12771
MCF7_-E2_only_Exhausted	REACTOME_DEGRADATION_OF_GLI1_BY_THE_PROTEASOME	0.506976	1	0.0178571	0.00570934	3.12771
MCF7_-E2_only_Exhausted	REACTOME_ORC1_REMOVAL_FROM_CHROMATIN	0.506976	1	0.0178571	0.00570934	3.12771
MCF7_-E2_only_Exhausted	REACTOME_PEPTIDE_HORMONE_METABOLISM	0.506976	1	0.0178571	0.00570934	3.12771
MCF7_-E2_only_Exhausted	REACTOME_REGULATION_OF_PTEN_GENE_TRANSCRIPTION	0.506976	1	0.0178571	0.00570934	3.12771
MCF7_-E2_only_Exhausted	REACTOME_REGULATION_OF_RAS_BY_GAPS	0.506976	1	0.0178571	0.00570934	3.12771
MCF7_-E2_only_Exhausted	REACTOME_RNA_POLYMERASE_II_TRANSCRIPTION_TERMINATION	0.506976	1	0.0178571	0.00570934	3.12771
MCF7_-E2_only_Exhausted	REACTOME_SCF_SKP2_MEDIATED_DEGRADATION_OF_P27_P21	0.506976	1	0.0178571	0.00570934	3.12771
MCF7_-E2_only_Exhausted	REACTOME_THE_ROLE_OF_GTSE1_IN_G2_M_PROGRESSION_AFTER_G2_CHECKPOINT	0.506976	1	0.0178571	0.00570934	3.12771
MCF7_-E2_only_Exhausted	REACTOME_ASYMMETRIC_LOCALIZATION_OF_PCP_PROTEINS	0.506976	1	0.0178571	0.00588235	3.03571
MCF7_-E2_only_Exhausted	HALLMARK_IL6_JAK_STAT3_SIGNALING	0.506976	1	0.0178571	0.00605536	2.94898
MCF7_-E2_only_Exhausted	REACTOME_PEROXISOMAL_PROTEIN_IMPORT	0.506976	1	0.0178571	0.00605536	2.94898
MCF7_-E2_only_Exhausted	REACTOME_HIV_INFECTION	0.506976	2	0.0357143	0.0193772	1.84311
MCF7_-E2_only_Exhausted	REACTOME_DNA_REPLICATION_PRE_INITIATION	0.506976	1	0.0178571	0.00622837	2.86706
MCF7_-E2_only_Exhausted	REACTOME_RUNX1_REGULATES_TRANSCRIPTION_OF_GENES_INVOLVED_IN_DIFFERENTIATION_OF_HSCS	0.506976	1	0.0178571	0.00622837	2.86706
MCF7_-E2_only_Exhausted	REACTOME_SIGNALING_BY_MET	0.506976	1	0.0178571	0.00622837	2.86706
MCF7_-E2_only_Exhausted	REACTOME_ABC_TRANSPORTER_DISORDERS	0.506976	1	0.0178571	0.00640138	2.78958
MCF7_-E2_only_Exhausted	REACTOME_ANTIVIRAL_MECHANISM_BY_IFN_STIMULATED_GENES	0.506976	1	0.0178571	0.00640138	2.78958
MCF7_-E2_only_Exhausted	REACTOME_CELLULAR_RESPONSE_TO_HYPOXIA	0.506976	1	0.0178571	0.00640138	2.78958
MCF7_-E2_only_Exhausted	REACTOME_CHROMOSOME_MAINTENANCE	0.506976	1	0.0178571	0.00640138	2.78958
MCF7_-E2_only_Exhausted	REACTOME_REGULATION_OF_PTEN_STABILITY_AND_ACTIVITY	0.506976	1	0.0178571	0.00640138	2.78958
MCF7_-E2_only_Exhausted	REACTOME_TRANSLOCATION_OF_SLC2A4_GLUT4_TO_THE_PLASMA_MEMBRANE	0.506976	1	0.0178571	0.00640138	2.78958
MCF7_-E2_only_Exhausted	REACTOME_TRANSPORT_OF_MATURE_TRANSCRIPT_TO_CYTOPLASM	0.506976	1	0.0178571	0.00640138	2.78958
MCF7_-E2_only_Exhausted	REACTOME_RNA_POLYMERASE_II_TRANSCRIPTION	0.506976	7	0.125	0.0975779	1.28103
MCF7_-E2_only_Exhausted	HALLMARK_PROTEIN_SECRETION	0.506976	1	0.0178571	0.00657439	2.71617
MCF7_-E2_only_Exhausted	REACTOME_HOMOLOGY_DIRECTED_REPAIR	0.506976	1	0.0178571	0.00657439	2.71617
MCF7_-E2_only_Exhausted	REACTOME_REGULATION_OF_RUNX2_EXPRESSION_AND_ACTIVITY	0.506976	1	0.0178571	0.00657439	2.71617
MCF7_-E2_only_Exhausted	REACTOME_SIGNALING_BY_INSULIN_RECEPTOR	0.506976	1	0.0178571	0.00657439	2.71617
MCF7_-E2_only_Exhausted	REACTOME_CELL_CYCLE_CHECKPOINTS	0.506976	2	0.0357143	0.0200692	1.77956
MCF7_-E2_only_Exhausted	REACTOME_APC_C_MEDIATED_DEGRADATION_OF_CELL_CYCLE_PROTEINS	0.508593	1	0.0178571	0.0067474	2.64652
MCF7_-E2_only_Exhausted	REACTOME_DOWNSTREAM_SIGNALING_EVENTS_OF_B_CELL_RECEPTOR_BCR_	0.508593	1	0.0178571	0.0067474	2.64652
MCF7_-E2_only_Exhausted	REACTOME_CLASS_B_2_SECRETIN_FAMILY_RECEPTORS_	0.508593	1	0.0178571	0.00692042	2.58036
MCF7_-E2_only_Exhausted	REACTOME_PROTEIN_UBIQUITINATION	0.508593	1	0.0178571	0.00692042	2.58036
MCF7_-E2_only_Exhausted	REACTOME_REGULATION_OF_TP53_ACTIVITY_THROUGH_PHOSPHORYLATION	0.508593	1	0.0178571	0.00692042	2.58036
MCF7_-E2_only_Exhausted	REACTOME_SWITCHING_OF_ORIGINS_TO_A_POST_REPLICATIVE_STATE	0.508593	1	0.0178571	0.00692042	2.58036
MCF7_-E2_only_Exhausted	REACTOME_DEGRADATION_OF_BETA_CATENIN_BY_THE_DESTRUCTION_COMPLEX	0.50942	1	0.0178571	0.00709343	2.51742
MCF7_-E2_only_Exhausted	REACTOME_FCERI_MEDIATED_NF_KB_ACTIVATION	0.50942	1	0.0178571	0.00709343	2.51742
MCF7_-E2_only_Exhausted	REACTOME_SUMOYLATION_OF_DNA_DAMAGE_RESPONSE_AND_REPAIR_PROTEINS	0.50942	1	0.0178571	0.00709343	2.51742
MCF7_-E2_only_Exhausted	REACTOME_METABOLISM_OF_NUCLEOTIDES	0.516342	1	0.0178571	0.00726644	2.45748
MCF7_-E2_only_Exhausted	REACTOME_PROTEIN_FOLDING	0.519933	1	0.0178571	0.00743945	2.40033
MCF7_-E2_only_Exhausted	REACTOME_STIMULI_SENSING_CHANNELS	0.519933	1	0.0178571	0.00743945	2.40033
MCF7_-E2_only_Exhausted	REACTOME_HCMV_INFECTION	0.523346	1	0.0178571	0.00761246	2.34578
MCF7_-E2_only_Exhausted	REACTOME_SIGNALING_BY_NOTCH4	0.523346	1	0.0178571	0.00761246	2.34578
MCF7_-E2_only_Exhausted	REACTOME_HATS_ACETYLATE_HISTONES	0.526149	1	0.0178571	0.00778547	2.29365
MCF7_-E2_only_Exhausted	REACTOME_REGULATION_OF_INSULIN_LIKE_GROWTH_FACTOR_IGF_TRANSPORT_AND_UPTAKE_BY_INSULIN_LIKE_GROWTH_FACTOR_BINDING_PROTEINS_IGFBPS_	0.526149	1	0.0178571	0.00778547	2.29365
MCF7_-E2_only_Exhausted	REACTOME_RHO_GTPASE_EFFECTORS	0.526149	2	0.0357143	0.0224913	1.58791
MCF7_-E2_only_Exhausted	HALLMARK_SPERMATOGENESIS	0.526149	1	0.0178571	0.00795848	2.24379
MCF7_-E2_only_Exhausted	REACTOME_CYCLIN_A_CDK2_ASSOCIATED_EVENTS_AT_S_PHASE_ENTRY	0.526149	1	0.0178571	0.00795848	2.24379
MCF7_-E2_only_Exhausted	REACTOME_ANTIGEN_PROCESSING_CROSS_PRESENTATION	0.526149	1	0.0178571	0.00813149	2.19605
MCF7_-E2_only_Exhausted	REACTOME_FCGAMMA_RECEPTOR_FCGR_DEPENDENT_PHAGOCYTOSIS	0.526149	1	0.0178571	0.00813149	2.19605
MCF7_-E2_only_Exhausted	REACTOME_PCP_CE_PATHWAY	0.526149	1	0.0178571	0.00813149	2.19605
MCF7_-E2_only_Exhausted	REACTOME_ESTROGEN_DEPENDENT_GENE_EXPRESSION	0.526149	1	0.0178571	0.0083045	2.1503
MCF7_-E2_only_Exhausted	REACTOME_NONSENSE_MEDIATED_DECAY_NMD_	0.526149	1	0.0178571	0.0083045	2.1503
MCF7_-E2_only_Exhausted	REACTOME_UCH_PROTEINASES	0.526149	1	0.0178571	0.0083045	2.1503
MCF7_-E2_only_Exhausted	REACTOME_ABC_FAMILY_PROTEINS_MEDIATED_TRANSPORT	0.526149	1	0.0178571	0.00847751	2.10641
MCF7_-E2_only_Exhausted	REACTOME_INTERLEUKIN_1_SIGNALING	0.526149	1	0.0178571	0.00847751	2.10641
MCF7_-E2_only_Exhausted	REACTOME_TRANSCRIPTIONAL_REGULATION_BY_RUNX3	0.526149	1	0.0178571	0.00847751	2.10641
MCF7_-E2_only_Exhausted	REACTOME_TRANSPORT_OF_SMALL_MOLECULES	0.52906	4	0.0714286	0.0560554	1.27425
MCF7_-E2_only_Exhausted	REACTOME_DNA_DOUBLE_STRAND_BREAK_REPAIR	0.542072	1	0.0178571	0.00899654	1.98489
MCF7_-E2_only_Exhausted	REACTOME_SIGNALING_BY_THE_B_CELL_RECEPTOR_BCR_	0.542072	1	0.0178571	0.00899654	1.98489
MCF7_-E2_only_Exhausted	REACTOME_DNA_REPLICATION	0.544184	1	0.0178571	0.00916955	1.94744
MCF7_-E2_only_Exhausted	REACTOME_TCR_SIGNALING	0.544184	1	0.0178571	0.00916955	1.94744
MCF7_-E2_only_Exhausted	HALLMARK_BILE_ACID_METABOLISM	0.546176	1	0.0178571	0.00934256	1.91138
MCF7_-E2_only_Exhausted	REACTOME_CLEC7A_DECTIN_1_SIGNALING	0.546176	1	0.0178571	0.00934256	1.91138
MCF7_-E2_only_Exhausted	REACTOME_ANTIGEN_PROCESSING_UBIQUITINATION_PROTEASOME_DEGRADATION	0.550367	2	0.0357143	0.0252595	1.41389
MCF7_-E2_only_Exhausted	HALLMARK_PEROXISOME	0.551478	1	0.0178571	0.00968858	1.84311
MCF7_-E2_only_Exhausted	REACTOME_EUKARYOTIC_TRANSLATION_INITIATION	0.551478	1	0.0178571	0.00968858	1.84311
MCF7_-E2_only_Exhausted	REACTOME_G2_M_CHECKPOINTS	0.551478	1	0.0178571	0.00986159	1.81078
MCF7_-E2_only_Exhausted	REACTOME_HEDGEHOG_OFF_STATE	0.551478	1	0.0178571	0.00986159	1.81078
MCF7_-E2_only_Exhausted	REACTOME_MAPK6_MAPK4_SIGNALING	0.551478	1	0.0178571	0.00986159	1.81078
MCF7_-E2_only_Exhausted	REACTOME_TRANSCRIPTIONAL_REGULATION_BY_RUNX2	0.562978	1	0.0178571	0.0102076	1.74939
MCF7_-E2_only_Exhausted	REACTOME_INTERLEUKIN_1_FAMILY_SIGNALING	0.587788	1	0.0178571	0.0108997	1.63832
MCF7_-E2_only_Exhausted	REACTOME_FC_EPSILON_RECEPTOR_FCERI_SIGNALING	0.591537	1	0.0178571	0.0110727	1.61272
MCF7_-E2_only_Exhausted	REACTOME_C_TYPE_LECTIN_RECEPTORS_CLRS_	0.60174	1	0.0178571	0.0114187	1.56385
MCF7_-E2_only_Exhausted	HALLMARK_EPITHELIAL_MESENCHYMAL_TRANSITION	0.623565	1	0.0178571	0.0121107	1.47449
MCF7_-E2_only_Exhausted	MCF7_+E2_Exhausted	0.623565	5	0.0892857	0.082699	1.07965
MCF7_-E2_only_Exhausted	REACTOME_MITOTIC_G1_PHASE_AND_G1_S_TRANSITION	0.624026	1	0.0178571	0.0122837	1.45372
MCF7_-E2_only_Exhausted	REACTOME_CLASS_I_MHC_MEDIATED_ANTIGEN_PROCESSING_PRESENTATION	0.624026	2	0.0357143	0.0299308	1.19323
MCF7_-E2_only_Exhausted	REACTOME_S_PHASE	0.624089	1	0.0178571	0.0124567	1.43353
MCF7_-E2_only_Exhausted	REACTOME_INTRACELLULAR_SIGNALING_BY_SECOND_MESSENGERS	0.625521	2	0.0357143	0.0302768	1.17959
MCF7_-E2_only_Exhausted	REACTOME_CELL_CYCLE	0.626766	3	0.0535714	0.0484429	1.10587
MCF7_-E2_only_Exhausted	REACTOME_BETA_CATENIN_INDEPENDENT_WNT_SIGNALING	0.626766	1	0.0178571	0.0128028	1.39479
MCF7_-E2_only_Exhausted	REACTOME_DISORDERS_OF_TRANSMEMBRANE_TRANSPORTERS	0.629502	1	0.0178571	0.0129758	1.37619
MCF7_-E2_only_Exhausted	REACTOME_INTERFERON_SIGNALING	0.637767	1	0.0178571	0.0133218	1.34045
MCF7_-E2_only_Exhausted	REACTOME_PROTEIN_LOCALIZATION	0.656536	1	0.0178571	0.0140138	1.27425
MCF7_-E2_only_Exhausted	REACTOME_ESR_MEDIATED_SIGNALING	0.65773	1	0.0178571	0.0141869	1.25871
MCF7_-E2_only_Exhausted	HALLMARK_TNFA_SIGNALING_VIA_NFKB	0.65773	1	0.0178571	0.0143599	1.24355
MCF7_-E2_only_Exhausted	HALLMARK_XENOBIOTIC_METABOLISM	0.65773	1	0.0178571	0.0143599	1.24355
MCF7_-E2_only_Exhausted	HALLMARK_COMPLEMENT	0.661756	1	0.0178571	0.0147059	1.21429
MCF7_-E2_only_Exhausted	REACTOME_SEPARATION_OF_SISTER_CHROMATIDS	0.661756	1	0.0178571	0.0147059	1.21429
MCF7_-E2_only_Exhausted	REACTOME_CILIUM_ASSEMBLY	0.66633	1	0.0178571	0.0150519	1.18637
MCF7_-E2_only_Exhausted	HALLMARK_MYOGENESIS	0.66633	1	0.0178571	0.0152249	1.17289
MCF7_-E2_only_Exhausted	REACTOME_PROGRAMMED_CELL_DEATH	0.66633	1	0.0178571	0.0155709	1.14683
MCF7_-E2_only_Exhausted	REACTOME_SUMOYLATION	0.66633	1	0.0178571	0.0155709	1.14683
MCF7_-E2_only_Exhausted	REACTOME_POST_TRANSLATIONAL_PROTEIN_MODIFICATION	0.66633	6	0.107143	0.109516	0.978334
MCF7_-E2_only_Exhausted	HALLMARK_G2M_CHECKPOINT	0.66633	1	0.0178571	0.0157439	1.13422
MCF7_-E2_only_Exhausted	REACTOME_MITOTIC_G2_G2_M_PHASES	0.66633	1	0.0178571	0.0157439	1.13422
MCF7_-E2_only_Exhausted	HALLMARK_OXIDATIVE_PHOSPHORYLATION	0.66633	1	0.0178571	0.015917	1.12189
MCF7_-E2_only_Exhausted	REACTOME_SIGNALING_BY_NOTCH	0.66633	1	0.0178571	0.015917	1.12189
MCF7_-E2_only_Exhausted	REACTOME_DISEASES_OF_SIGNAL_TRANSDUCTION_BY_GROWTH_FACTOR_RECEPTORS_AND_SECOND_MESSENGERS	0.66633	2	0.0357143	0.0354671	1.00697
MCF7_-E2_only_Exhausted	HALLMARK_HYPOXIA	0.66633	1	0.0178571	0.01609	1.10983
MCF7_-E2_only_Exhausted	REACTOME_INNATE_IMMUNE_SYSTEM	0.671489	4	0.0714286	0.0742215	0.962371
MCF7_-E2_only_Exhausted	HALLMARK_GLYCOLYSIS	0.681875	1	0.0178571	0.016955	1.05321
MCF7_-E2_only_Exhausted	HALLMARK_MTORC1_SIGNALING	0.695204	1	0.0178571	0.0176471	1.0119
MCF7_-E2_only_Exhausted	HALLMARK_MYC_TARGETS_V1	0.700065	1	0.0178571	0.0179931	0.992445
MCF7_-E2_only_Exhausted	REACTOME_DISEASES_OF_METABOLISM	0.706824	1	0.0178571	0.0186851	0.955688
MCF7_-E2_only_Exhausted	REACTOME_CHROMATIN_MODIFYING_ENZYMES	0.706824	1	0.0178571	0.0188581	0.94692
MCF7_-E2_only_Exhausted	REACTOME_MITOTIC_METAPHASE_AND_ANAPHASE	0.706824	1	0.0178571	0.0188581	0.94692
MCF7_-E2_only_Exhausted	REACTOME_NEDDYLATION	0.706824	1	0.0178571	0.0188581	0.94692
MCF7_-E2_only_Exhausted	REACTOME_INFECTIOUS_DISEASE	0.715363	3	0.0535714	0.0605536	0.884694
MCF7_-E2_only_Exhausted	REACTOME_SIGNALING_BY_NUCLEAR_RECEPTORS	0.725354	1	0.0178571	0.0200692	0.889778
MCF7_-E2_only_Exhausted	REACTOME_SIGNALING_BY_RECEPTOR_TYROSINE_KINASES	0.734167	2	0.0357143	0.0422145	0.846019
MCF7_-E2_only_Exhausted	REACTOME_CYTOKINE_SIGNALING_IN_IMMUNE_SYSTEM	0.741705	3	0.0535714	0.0636678	0.841421
MCF7_-E2_only_Exhausted	REACTOME_DNA_REPAIR	0.745044	1	0.0178571	0.0216263	0.825714
MCF7_-E2_only_Exhausted	REACTOME_ORGANELLE_BIOGENESIS_AND_MAINTENANCE	0.762562	1	0.0178571	0.0228374	0.781926
MCF7_-E2_only_Exhausted	REACTOME_TRANSLATION	0.765012	1	0.0178571	0.0231834	0.770256
MCF7_-E2_only_Exhausted	REACTOME_FLT3_SIGNALING	0.770035	1	0.0178571	0.0237024	0.753389
MCF7_-E2_only_Exhausted	REACTOME_NERVOUS_SYSTEM_DEVELOPMENT	0.778488	2	0.0357143	0.0474048	0.753389
MCF7_-E2_only_Exhausted	REACTOME_METABOLISM_OF_CARBOHYDRATES	0.78176	1	0.0178571	0.0249135	0.716766
MCF7_-E2_only_Exhausted	REACTOME_GPCR_LIGAND_BINDING	0.792107	1	0.0178571	0.0259516	0.688095
MCF7_-E2_only_Exhausted	REACTOME_METABOLISM_OF_AMINO_ACIDS_AND_DERIVATIVES	0.792107	1	0.0178571	0.0261246	0.683538
MCF7_-E2_only_Exhausted	REACTOME_DEVELOPMENTAL_BIOLOGY	0.802984	3	0.0535714	0.0731834	0.732016
MCF7_-E2_only_Exhausted	REACTOME_ADAPTIVE_IMMUNE_SYSTEM	0.811697	2	0.0357143	0.0529412	0.674603
MCF7_-E2_only_Exhausted	REACTOME_DISEASE	0.811697	5	0.0892857	0.118166	0.755595
MCF7_-E2_only_Exhausted	REACTOME_MAPK_FAMILY_SIGNALING_CASCADES	0.811697	1	0.0178571	0.0288927	0.61805
MCF7_-E2_only_Exhausted	REACTOME_M_PHASE	0.811697	1	0.0178571	0.0290657	0.614371
MCF7_-E2_only_Exhausted	REACTOME_SIGNALING_BY_INTERLEUKINS	0.849163	1	0.0178571	0.033218	0.537574
MCF7_-E2_only_Exhausted	REACTOME_NEUTROPHIL_DEGRANULATION	0.880105	1	0.0178571	0.0377163	0.47346
MCF7_-E2_only_Exhausted	REACTOME_CELL_CYCLE_MITOTIC	0.887603	1	0.0178571	0.0394464	0.452694
MCF7_-E2_only_Exhausted	REACTOME_SIGNALING_BY_GPCR	0.950499	1	0.0178571	0.0570934	0.312771
MCF7_Both_Expanded	MCF7_+E2_Expanded	8.01744e-09	3	1	0.00121107	825.714
MCF7_Both_Expanded	MCF7_-E2_Expanded	3.35014e-07	3	1	0.00467128	214.074
MCF7_Both_Expanded	REACTOME_TRANSCRIPTIONAL_REGULATION_OF_WHITE_ADIPOCYTE_DIFFERENTIATION	0.000342618	2	0.666667	0.00692042	96.3333
MCF7_Both_Expanded	REACTOME_RESPONSE_OF_EIF2AK1_HRI_TO_HEME_DEFICIENCY	0.00720396	1	0.333333	0.0017301	192.667
MCF7_Both_Expanded	REACTOME_ATF4_ACTIVATES_GENES_IN_RESPONSE_TO_ENDOPLASMIC_RETICULUM_STRESS	0.00720396	1	0.333333	0.00242215	137.619
MCF7_Both_Expanded	REACTOME_PERK_REGULATES_GENE_EXPRESSION	0.00720396	1	0.333333	0.00276817	120.417
MCF7_Both_Expanded	REACTOME_SENESCENCE_ASSOCIATED_SECRETORY_PHENOTYPE_SASP_	0.00720396	1	0.333333	0.00276817	120.417
MCF7_Both_Expanded	REACTOME_TRANSCRIPTIONAL_REGULATION_BY_VENTX	0.00720396	1	0.333333	0.00294118	113.333
MCF7_Both_Expanded	REACTOME_TRANSCRIPTIONAL_REGULATION_OF_GRANULOPOIESIS	0.00720396	1	0.333333	0.00294118	113.333
MCF7_Both_Expanded	REACTOME_DEVELOPMENTAL_BIOLOGY	0.0112394	2	0.666667	0.0731834	9.10954
MCF7_Both_Expanded	REACTOME_UNFOLDED_PROTEIN_RESPONSE_UPR_	0.0139615	1	0.333333	0.00813149	40.9929
MCF7_Both_Expanded	REACTOME_RESPONSE_OF_EIF2AK4_GCN2_TO_AMINO_ACID_DEFICIENCY	0.0139615	1	0.333333	0.0083045	40.1389
MCF7_Both_Expanded	REACTOME_RNA_POLYMERASE_II_TRANSCRIPTION	0.0139615	2	0.666667	0.0975779	6.83215
MCF7_Both_Expanded	REACTOME_REGULATION_OF_LIPID_METABOLISM_BY_PPARALPHA	0.0139615	1	0.333333	0.00951557	35.0303
MCF7_Both_Expanded	REACTOME_CELLULAR_SENESCENCE	0.0139615	1	0.333333	0.0100346	33.2184
MCF7_Both_Expanded	HALLMARK_UNFOLDED_PROTEIN_RESPONSE	0.0139615	1	0.333333	0.0102076	32.6554
MCF7_Both_Expanded	HALLMARK_TNFA_SIGNALING_VIA_NFKB	0.0174479	1	0.333333	0.0143599	23.2129
MCF7_Both_Expanded	HALLMARK_COMPLEMENT	0.0174479	1	0.333333	0.0147059	22.6667
MCF7_Both_Expanded	REACTOME_UB_SPECIFIC_PROCESSING_PROTEASES	0.0174479	1	0.333333	0.0152249	21.8939
MCF7_Both_Expanded	REACTOME_DEUBIQUITINATION	0.0237595	1	0.333333	0.0219723	15.1706
MCF7_Both_Expanded	REACTOME_CELLULAR_RESPONSES_TO_EXTERNAL_STIMULI	0.0440953	1	0.333333	0.0437716	7.61528
MCF7_Both_Expanded	REACTOME_METABOLISM_OF_LIPIDS	0.0553973	1	0.333333	0.0584775	5.7002
MCF7_Both_Expanded	LTED_Expanded	0.0563652	1	0.333333	0.0624567	5.33703
MCF7_Both_Expanded	REACTOME_POST_TRANSLATIONAL_PROTEIN_MODIFICATION	0.0902399	1	0.333333	0.109516	3.04371
MCF7_Both_Expanded	LTED_Exhausted	0.101546	1	0.333333	0.131315	2.53843
MCF7_Both_Expanded	Essential_Genes	0.173831	1	0.333333	0.271453	1.22796
MCF7_+E2_only_Expanded	MCF7_+E2_Expanded	7.13736e-12	4	1	0.00121107	825.714
MCF7_+E2_only_Expanded	REACTOME_NEGATIVE_REGULATION_OF_ACTIVITY_OF_TFAP2_AP_2_FAMILY_TRANSCRIPTION_FACTORS	0.0261771	1	0.25	0.00138408	180.625
MCF7_+E2_only_Expanded	REACTOME_TRANSCRIPTIONAL_REGULATION_BY_THE_AP_2_TFAP2_FAMILY_OF_TRANSCRIPTION_FACTORS	0.0413289	1	0.25	0.0032872	76.0526
MCF7_+E2_only_Expanded	REACTOME_RESPONSE_TO_ELEVATED_PLATELET_CYTOSOLIC_CA2_	0.100023	1	0.25	0.0107266	23.3065
MCF7_+E2_only_Expanded	REACTOME_PLATELET_ACTIVATION_SIGNALING_AND_AGGREGATION	0.162386	1	0.25	0.0221453	11.2891
MCF7_+E2_only_Expanded	MCF7_-E2_Exhausted	0.224359	1	0.25	0.0416955	5.99585
MCF7_+E2_only_Expanded	REACTOME_HEMOSTASIS	0.224359	1	0.25	0.0442907	5.64453
MCF7_+E2_only_Expanded	Mutated_metUp_Single	0.239405	1	0.25	0.0565744	4.41896
MCF7_+E2_only_Expanded	LTED_Expanded	0.239405	1	0.25	0.0624567	4.00277
MCF7_+E2_only_Expanded	MCF7_+E2_Exhausted	0.276672	1	0.25	0.082699	3.02301
MCF7_+E2_only_Expanded	REACTOME_RNA_POLYMERASE_II_TRANSCRIPTION	0.290138	1	0.25	0.0975779	2.56206
MCF7_+E2_only_Expanded	LTED_Exhausted	0.339985	1	0.25	0.131315	1.90382
MCF7_+E2_only_Expanded	Mutated_Any_Single	0.344986	1	0.25	0.148097	1.68808
MCF7_-E2_only_Expanded	MCF7_-E2_Expanded	9.95124e-62	24	1	0.00467128	214.074
MCF7_-E2_only_Expanded	REACTOME_DISEASES_OF_IMMUNE_SYSTEM	0.000513241	3	0.125	0.00190311	65.6818
MCF7_-E2_only_Expanded	REACTOME_TOLL_LIKE_RECEPTOR_CASCADES	0.00495922	4	0.166667	0.0124567	13.3796
MCF7_-E2_only_Expanded	REACTOME_P75NTR_RECRUITS_SIGNALLING_COMPLEXES	0.00495922	2	0.0833333	0.00103806	80.2778
MCF7_-E2_only_Expanded	REACTOME_TRAF6_MEDIATED_IRF7_ACTIVATION_IN_TLR7_8_OR_9_SIGNALING	0.00495922	2	0.0833333	0.00103806	80.2778
MCF7_-E2_only_Expanded	REACTOME_P75NTR_SIGNALS_VIA_NF_KB	0.00767526	2	0.0833333	0.00138408	60.2083
MCF7_-E2_only_Expanded	REACTOME_TOLL_LIKE_RECEPTOR_10_TLR10_CASCADE	0.00811293	3	0.125	0.00692042	18.0625
MCF7_-E2_only_Expanded	REACTOME_INNATE_IMMUNE_SYSTEM	0.0868104	6	0.25	0.0742215	3.3683
MCF7_-E2_only_Expanded	REACTOME_CHROMATIN_MODIFYING_ENZYMES	0.090653	3	0.125	0.0188581	6.62844
MCF7_-E2_only_Expanded	REACTOME_TOLL_LIKE_RECEPTOR_9_TLR9_CASCADE	0.090653	2	0.0833333	0.00726644	11.4683
MCF7_-E2_only_Expanded	REACTOME_TOLL_LIKE_RECEPTOR_TLR1_TLR2_CASCADE	0.090653	2	0.0833333	0.00743945	11.2016
MCF7_-E2_only_Expanded	REACTOME_P75_NTR_RECEPTOR_MEDIATED_SIGNALLING	0.090653	2	0.0833333	0.00813149	10.2482
MCF7_-E2_only_Expanded	REACTOME_INTERLEUKIN_1_SIGNALING	0.090653	2	0.0833333	0.00847751	9.82993
MCF7_-E2_only_Expanded	REACTOME_ALPHA_PROTEIN_KINASE_1_SIGNALING_PATHWAY	0.090653	1	0.0416667	0.000865052	48.1667
MCF7_-E2_only_Expanded	REACTOME_DEX_H_BOX_HELICASES_ACTIVATE_TYPE_I_IFN_AND_INFLAMMATORY_CYTOKINES_PRODUCTION_	0.090653	1	0.0416667	0.000865052	48.1667
MCF7_-E2_only_Expanded	REACTOME_IRAK1_RECRUITS_IKK_COMPLEX	0.090653	1	0.0416667	0.000865052	48.1667
MCF7_-E2_only_Expanded	REACTOME_LOSS_OF_FUNCTION_OF_SMAD2_3_IN_CANCER	0.090653	1	0.0416667	0.000865052	48.1667
MCF7_-E2_only_Expanded	REACTOME_TRAF6_MEDIATED_INDUCTION_OF_TAK1_COMPLEX_WITHIN_TLR4_COMPLEX	0.090653	1	0.0416667	0.000865052	48.1667
MCF7_-E2_only_Expanded	REACTOME_ZINC_EFFLUX_AND_COMPARTMENTALIZATION_BY_THE_SLC30_FAMILY	0.090653	1	0.0416667	0.000865052	48.1667
MCF7_-E2_only_Expanded	HALLMARK_PI3K_AKT_MTOR_SIGNALING	0.090653	2	0.0833333	0.00986159	8.45029
MCF7_-E2_only_Expanded	REACTOME_DECTIN_2_FAMILY	0.090653	1	0.0416667	0.00103806	40.1389
MCF7_-E2_only_Expanded	REACTOME_FOXO_MEDIATED_TRANSCRIPTION_OF_CELL_CYCLE_GENES	0.090653	1	0.0416667	0.00103806	40.1389
MCF7_-E2_only_Expanded	REACTOME_NF_KB_IS_ACTIVATED_AND_SIGNALS_SURVIVAL	0.090653	1	0.0416667	0.00103806	40.1389
MCF7_-E2_only_Expanded	REACTOME_REGULATED_PROTEOLYSIS_OF_P75NTR	0.090653	1	0.0416667	0.00103806	40.1389
MCF7_-E2_only_Expanded	REACTOME_RIP_MEDIATED_NFKB_ACTIVATION_VIA_ZBP1	0.090653	1	0.0416667	0.00103806	40.1389
MCF7_-E2_only_Expanded	REACTOME_SIGNALING_BY_TGF_BETA_RECEPTOR_COMPLEX_IN_CANCER	0.090653	1	0.0416667	0.00103806	40.1389
MCF7_-E2_only_Expanded	REACTOME_TGF_BETA_RECEPTOR_SIGNALING_IN_EMT_EPITHELIAL_TO_MESENCHYMAL_TRANSITION_	0.090653	1	0.0416667	0.00103806	40.1389
MCF7_-E2_only_Expanded	REACTOME_NEGATIVE_REGULATION_OF_THE_PI3K_AKT_NETWORK	0.090653	2	0.0833333	0.0103806	8.02778
MCF7_-E2_only_Expanded	REACTOME_TOLL_LIKE_RECEPTOR_4_TLR4_CASCADE	0.090653	2	0.0833333	0.0107266	7.76882
MCF7_-E2_only_Expanded	REACTOME_INTERLEUKIN_1_FAMILY_SIGNALING	0.090653	2	0.0833333	0.0108997	7.6455
MCF7_-E2_only_Expanded	REACTOME_NRIF_SIGNALS_CELL_DEATH_FROM_THE_NUCLEUS	0.090653	1	0.0416667	0.00121107	34.4048
MCF7_-E2_only_Expanded	REACTOME_TERMINATION_OF_O_GLYCAN_BIOSYNTHESIS	0.090653	1	0.0416667	0.00121107	34.4048
MCF7_-E2_only_Expanded	REACTOME_C_TYPE_LECTIN_RECEPTORS_CLRS_	0.090653	2	0.0833333	0.0114187	7.29798
MCF7_-E2_only_Expanded	REACTOME_TP53_REGULATES_TRANSCRIPTION_OF_GENES_INVOLVED_IN_G1_CELL_CYCLE_ARREST	0.090653	1	0.0416667	0.00138408	30.1042
MCF7_-E2_only_Expanded	REACTOME_ZBP1_DAI_MEDIATED_INDUCTION_OF_TYPE_I_IFNS	0.090653	1	0.0416667	0.00138408	30.1042
MCF7_-E2_only_Expanded	REACTOME_INTRACELLULAR_SIGNALING_BY_SECOND_MESSENGERS	0.090653	3	0.125	0.0302768	4.12857
MCF7_-E2_only_Expanded	REACTOME_DEATH_RECEPTOR_SIGNALLING	0.090653	2	0.0833333	0.0124567	6.68981
MCF7_-E2_only_Expanded	REACTOME_AKT_PHOSPHORYLATES_TARGETS_IN_THE_CYTOSOL	0.090653	1	0.0416667	0.00155709	26.7593
MCF7_-E2_only_Expanded	REACTOME_CARNITINE_METABOLISM	0.090653	1	0.0416667	0.00155709	26.7593
MCF7_-E2_only_Expanded	REACTOME_TICAM1_RIP1_MEDIATED_IKK_COMPLEX_RECRUITMENT	0.090653	1	0.0416667	0.00155709	26.7593
MCF7_-E2_only_Expanded	REACTOME_TRAF6_MEDIATED_IRF7_ACTIVATION	0.090653	1	0.0416667	0.00155709	26.7593
MCF7_-E2_only_Expanded	REACTOME_DNA_DAMAGE_TELOMERE_STRESS_INDUCED_SENESCENCE	0.0915904	1	0.0416667	0.0017301	24.0833
MCF7_-E2_only_Expanded	REACTOME_IKK_COMPLEX_RECRUITMENT_MEDIATED_BY_RIP1	0.0915904	1	0.0416667	0.0017301	24.0833
MCF7_-E2_only_Expanded	REACTOME_TRAF6_MEDIATED_NF_KB_ACTIVATION	0.0915904	1	0.0416667	0.0017301	24.0833
MCF7_-E2_only_Expanded	REACTOME_ZINC_TRANSPORTERS	0.0915904	1	0.0416667	0.0017301	24.0833
MCF7_-E2_only_Expanded	REACTOME_ABERRANT_REGULATION_OF_MITOTIC_G1_S_TRANSITION_IN_CANCER_DUE_TO_RB1_DEFECTS	0.0983641	1	0.0416667	0.00190311	21.8939
MCF7_-E2_only_Expanded	REACTOME_ESTROGEN_DEPENDENT_NUCLEAR_EVENTS_DOWNSTREAM_OF_ESR_MEMBRANE_SIGNALING	0.0985264	1	0.0416667	0.00207612	20.0694
MCF7_-E2_only_Expanded	REACTOME_JNK_C_JUN_KINASES_PHOSPHORYLATION_AND_ACTIVATION_MEDIATED_BY_ACTIVATED_HUMAN_TAK1	0.0985264	1	0.0416667	0.00207612	20.0694
MCF7_-E2_only_Expanded	REACTOME_RHO_GTPASES_ACTIVATE_CIT	0.0985264	1	0.0416667	0.00207612	20.0694
MCF7_-E2_only_Expanded	REACTOME_RORA_ACTIVATES_GENE_EXPRESSION	0.0985264	1	0.0416667	0.00207612	20.0694
MCF7_-E2_only_Expanded	REACTOME_UB_SPECIFIC_PROCESSING_PROTEASES	0.10092	2	0.0833333	0.0152249	5.47348
MCF7_-E2_only_Expanded	REACTOME_DISEASE	0.102226	6	0.25	0.118166	2.11567
MCF7_-E2_only_Expanded	REACTOME_ACTIVATED_TAK1_MEDIATES_P38_MAPK_ACTIVATION	0.102226	1	0.0416667	0.00242215	17.2024
MCF7_-E2_only_Expanded	REACTOME_DOWNREGULATION_OF_TGF_BETA_RECEPTOR_SIGNALING	0.102226	1	0.0416667	0.00242215	17.2024
MCF7_-E2_only_Expanded	REACTOME_METAL_ION_SLC_TRANSPORTERS	0.102226	1	0.0416667	0.00242215	17.2024
MCF7_-E2_only_Expanded	REACTOME_TAK1_ACTIVATES_NFKB_BY_PHOSPHORYLATION_AND_ACTIVATION_OF_IKKS_COMPLEX	0.102226	1	0.0416667	0.00242215	17.2024
MCF7_-E2_only_Expanded	REACTOME_CONSTITUTIVE_SIGNALING_BY_AKT1_E17K_IN_CANCER	0.107394	1	0.0416667	0.00259516	16.0556
MCF7_-E2_only_Expanded	REACTOME_REGULATION_OF_TP53_ACTIVITY_THROUGH_ACETYLATION	0.110452	1	0.0416667	0.00276817	15.0521
MCF7_-E2_only_Expanded	REACTOME_SENESCENCE_ASSOCIATED_SECRETORY_PHENOTYPE_SASP_	0.110452	1	0.0416667	0.00276817	15.0521
MCF7_-E2_only_Expanded	REACTOME_DISEASES_OF_MITOTIC_CELL_CYCLE	0.115171	1	0.0416667	0.00294118	14.1667
MCF7_-E2_only_Expanded	REACTOME_OVARIAN_TUMOR_DOMAIN_PROTEASES	0.11778	1	0.0416667	0.00311419	13.3796
MCF7_-E2_only_Expanded	REACTOME_TGF_BETA_RECEPTOR_SIGNALING_ACTIVATES_SMADS	0.11778	1	0.0416667	0.00311419	13.3796
MCF7_-E2_only_Expanded	REACTOME_NOD1_2_SIGNALING_PATHWAY	0.1202	1	0.0416667	0.0032872	12.6754
MCF7_-E2_only_Expanded	REACTOME_SIGNALING_BY_RETINOIC_ACID	0.1202	1	0.0416667	0.0032872	12.6754
MCF7_-E2_only_Expanded	REACTOME_PKMTS_METHYLATE_HISTONE_LYSINES	0.122451	1	0.0416667	0.00346021	12.0417
MCF7_-E2_only_Expanded	REACTOME_RMTS_METHYLATE_HISTONE_ARGININES	0.122451	1	0.0416667	0.00346021	12.0417
MCF7_-E2_only_Expanded	REACTOME_SIGNALING_BY_NUCLEAR_RECEPTORS	0.12484	2	0.0833333	0.0200692	4.1523
MCF7_-E2_only_Expanded	REACTOME_O_LINKED_GLYCOSYLATION_OF_MUCINS	0.13022	1	0.0416667	0.00380623	10.947
MCF7_-E2_only_Expanded	REACTOME_CYCLIN_D_ASSOCIATED_EVENTS_IN_G1	0.133902	1	0.0416667	0.00397924	10.471
MCF7_-E2_only_Expanded	REACTOME_TP53_REGULATES_TRANSCRIPTION_OF_CELL_CYCLE_GENES	0.136618	1	0.0416667	0.00415225	10.0347
MCF7_-E2_only_Expanded	REACTOME_DEUBIQUITINATION	0.136618	2	0.0833333	0.0219723	3.79265
MCF7_-E2_only_Expanded	REACTOME_RUNX1_INTERACTS_WITH_CO_FACTORS_WHOSE_PRECISE_EFFECT_ON_RUNX1_TARGETS_IS_NOT_KNOWN	0.136618	1	0.0416667	0.00432526	9.63333
MCF7_-E2_only_Expanded	REACTOME_SIGNALING_BY_PTK6	0.136618	1	0.0416667	0.00432526	9.63333
MCF7_-E2_only_Expanded	REACTOME_CYTOSOLIC_SENSORS_OF_PATHOGEN_ASSOCIATED_DNA_	0.136618	1	0.0416667	0.00449827	9.26282
MCF7_-E2_only_Expanded	REACTOME_DISEASES_ASSOCIATED_WITH_O_GLYCOSYLATION_OF_PROTEINS	0.136618	1	0.0416667	0.00449827	9.26282
MCF7_-E2_only_Expanded	REACTOME_NUCLEOTIDE_BINDING_DOMAIN_LEUCINE_RICH_REPEAT_CONTAINING_RECEPTOR_NLR_SIGNALING_PATHWAYS	0.136618	1	0.0416667	0.00449827	9.26282
MCF7_-E2_only_Expanded	HALLMARK_TGF_BETA_SIGNALING	0.142792	1	0.0416667	0.00484429	8.60119
MCF7_-E2_only_Expanded	REACTOME_RAB_GERANYLGERANYLATION	0.142792	1	0.0416667	0.00484429	8.60119
MCF7_-E2_only_Expanded	REACTOME_DDX58_IFIH1_MEDIATED_INDUCTION_OF_INTERFERON_ALPHA_BETA	0.155175	1	0.0416667	0.00536332	7.76882
MCF7_-E2_only_Expanded	REACTOME_FOXO_MEDIATED_TRANSCRIPTION	0.157869	1	0.0416667	0.00553633	7.52604
MCF7_-E2_only_Expanded	REACTOME_G1_S_DNA_DAMAGE_CHECKPOINTS	0.158521	1	0.0416667	0.00570934	7.29798
MCF7_-E2_only_Expanded	REACTOME_SCF_SKP2_MEDIATED_DEGRADATION_OF_P27_P21	0.158521	1	0.0416667	0.00570934	7.29798
MCF7_-E2_only_Expanded	REACTOME_EXTRA_NUCLEAR_ESTROGEN_SIGNALING	0.161041	1	0.0416667	0.00588235	7.08333
MCF7_-E2_only_Expanded	HALLMARK_IL6_JAK_STAT3_SIGNALING	0.161561	1	0.0416667	0.00605536	6.88095
MCF7_-E2_only_Expanded	REACTOME_TRANSPORT_OF_BILE_SALTS_AND_ORGANIC_ACIDS_METAL_IONS_AND_AMINE_COMPOUNDS	0.161561	1	0.0416667	0.00605536	6.88095
MCF7_-E2_only_Expanded	REACTOME_INTERLEUKIN_17_SIGNALING	0.16204	1	0.0416667	0.00622837	6.68981
MCF7_-E2_only_Expanded	REACTOME_SIGNALING_BY_TGF_BETA_RECEPTOR_COMPLEX	0.16204	1	0.0416667	0.00622837	6.68981
MCF7_-E2_only_Expanded	REACTOME_CELL_DEATH_SIGNALLING_VIA_NRAGE_NRIF_AND_NADE	0.170596	1	0.0416667	0.0067474	6.17521
MCF7_-E2_only_Expanded	REACTOME_CIRCADIAN_CLOCK	0.170596	1	0.0416667	0.0067474	6.17521
MCF7_-E2_only_Expanded	REACTOME_FCERI_MEDIATED_NF_KB_ACTIVATION	0.176662	1	0.0416667	0.00709343	5.87398
MCF7_-E2_only_Expanded	REACTOME_TRANSCRIPTIONAL_REGULATION_BY_TP53	0.184387	2	0.0833333	0.0306228	2.72128
MCF7_-E2_only_Expanded	REACTOME_O_LINKED_GLYCOSYLATION	0.184387	1	0.0416667	0.00761246	5.47348
MCF7_-E2_only_Expanded	REACTOME_HATS_ACETYLATE_HISTONES	0.186187	1	0.0416667	0.00778547	5.35185
MCF7_-E2_only_Expanded	REACTOME_CYCLIN_A_CDK2_ASSOCIATED_EVENTS_AT_S_PHASE_ENTRY	0.187372	1	0.0416667	0.00795848	5.23551
MCF7_-E2_only_Expanded	REACTOME_ANTIGEN_PROCESSING_CROSS_PRESENTATION	0.187372	1	0.0416667	0.00813149	5.12411
MCF7_-E2_only_Expanded	REACTOME_MYD88_INDEPENDENT_TLR4_CASCADE_	0.187372	1	0.0416667	0.0083045	5.01736
MCF7_-E2_only_Expanded	REACTOME_SIGNALING_BY_TGFB_FAMILY_MEMBERS	0.187372	1	0.0416667	0.0083045	5.01736
MCF7_-E2_only_Expanded	REACTOME_UCH_PROTEINASES	0.187372	1	0.0416667	0.0083045	5.01736
MCF7_-E2_only_Expanded	REACTOME_SIGNALING_BY_INTERLEUKINS	0.192663	2	0.0833333	0.033218	2.50868
MCF7_-E2_only_Expanded	REACTOME_TCR_SIGNALING	0.200798	1	0.0416667	0.00916955	4.54403
MCF7_-E2_only_Expanded	REACTOME_CLEC7A_DECTIN_1_SIGNALING	0.201525	1	0.0416667	0.00934256	4.45988
MCF7_-E2_only_Expanded	REACTOME_PI3K_AKT_SIGNALING_IN_CANCER	0.201525	1	0.0416667	0.00951557	4.37879
MCF7_-E2_only_Expanded	REACTOME_REGULATION_OF_LIPID_METABOLISM_BY_PPARALPHA	0.201525	1	0.0416667	0.00951557	4.37879
MCF7_-E2_only_Expanded	REACTOME_DISEASES_OF_SIGNAL_TRANSDUCTION_BY_GROWTH_FACTOR_RECEPTORS_AND_SECOND_MESSENGERS	0.202638	2	0.0833333	0.0354671	2.34959
MCF7_-E2_only_Expanded	REACTOME_CELLULAR_SENESCENCE	0.207265	1	0.0416667	0.0100346	4.1523
MCF7_-E2_only_Expanded	HALLMARK_COAGULATION	0.208447	1	0.0416667	0.0102076	4.08192
MCF7_-E2_only_Expanded	REACTOME_DISEASES_OF_GLYCOSYLATION	0.209595	1	0.0416667	0.0103806	4.01389
MCF7_-E2_only_Expanded	REACTOME_FC_EPSILON_RECEPTOR_FCERI_SIGNALING	0.219799	1	0.0416667	0.0110727	3.76302
MCF7_-E2_only_Expanded	HALLMARK_FATTY_ACID_METABOLISM	0.220761	1	0.0416667	0.0112457	3.70513
MCF7_-E2_only_Expanded	HALLMARK_UV_RESPONSE_DN	0.227536	1	0.0416667	0.0117647	3.54167
MCF7_-E2_only_Expanded	HALLMARK_APOPTOSIS	0.23123	1	0.0416667	0.0121107	3.44048
MCF7_-E2_only_Expanded	REACTOME_MITOTIC_G1_PHASE_AND_G1_S_TRANSITION	0.231995	1	0.0416667	0.0122837	3.39202
MCF7_-E2_only_Expanded	REACTOME_S_PHASE	0.232734	1	0.0416667	0.0124567	3.34491
MCF7_-E2_only_Expanded	REACTOME_POST_TRANSLATIONAL_PROTEIN_MODIFICATION	0.234142	4	0.166667	0.109516	1.52185
MCF7_-E2_only_Expanded	HALLMARK_INTERFERON_GAMMA_RESPONSE	0.234142	1	0.0416667	0.0128028	3.2545
MCF7_-E2_only_Expanded	Mutated_Any_Single	0.240735	5	0.208333	0.148097	1.40674
MCF7_-E2_only_Expanded	REACTOME_REGULATION_OF_TP53_ACTIVITY	0.240735	1	0.0416667	0.0134948	3.08761
MCF7_-E2_only_Expanded	REACTOME_ESR_MEDIATED_SIGNALING	0.246938	1	0.0416667	0.0141869	2.93699
MCF7_-E2_only_Expanded	REACTOME_FATTY_ACID_METABOLISM	0.246938	1	0.0416667	0.0141869	2.93699
MCF7_-E2_only_Expanded	HALLMARK_COMPLEMENT	0.250311	1	0.0416667	0.0147059	2.83333
MCF7_-E2_only_Expanded	HALLMARK_HEME_METABOLISM	0.250311	1	0.0416667	0.0147059	2.83333
MCF7_-E2_only_Expanded	HALLMARK_E2F_TARGETS	0.253138	1	0.0416667	0.0150519	2.7682
MCF7_-E2_only_Expanded	HALLMARK_G2M_CHECKPOINT	0.260642	1	0.0416667	0.0157439	2.64652
MCF7_-E2_only_Expanded	HALLMARK_OXIDATIVE_PHOSPHORYLATION	0.260887	1	0.0416667	0.015917	2.61775
MCF7_-E2_only_Expanded	HALLMARK_HYPOXIA	0.261119	1	0.0416667	0.01609	2.58961
MCF7_-E2_only_Expanded	REACTOME_TRANSCRIPTIONAL_REGULATION_BY_RUNX1	0.270411	1	0.0416667	0.016955	2.45748
MCF7_-E2_only_Expanded	REACTOME_SLC_MEDIATED_TRANSMEMBRANE_TRANSPORT	0.286296	1	0.0416667	0.0185121	2.25078
MCF7_-E2_only_Expanded	REACTOME_DISEASES_OF_METABOLISM	0.286296	1	0.0416667	0.0186851	2.22994
MCF7_-E2_only_Expanded	REACTOME_ADAPTIVE_IMMUNE_SYSTEM	0.286296	2	0.0833333	0.0529412	1.57407
MCF7_-E2_only_Expanded	REACTOME_CELL_CYCLE_CHECKPOINTS	0.299944	1	0.0416667	0.0200692	2.07615
MCF7_-E2_only_Expanded	REACTOME_RNA_POLYMERASE_II_TRANSCRIPTION	0.322564	3	0.125	0.0975779	1.28103
MCF7_-E2_only_Expanded	REACTOME_RHO_GTPASE_EFFECTORS	0.322564	1	0.0416667	0.0224913	1.85256
MCF7_-E2_only_Expanded	LTED_Expanded	0.34002	2	0.0833333	0.0624567	1.33426
MCF7_-E2_only_Expanded	REACTOME_CYTOKINE_SIGNALING_IN_IMMUNE_SYSTEM	0.345081	2	0.0833333	0.0636678	1.30888
MCF7_-E2_only_Expanded	Mutated_Any_Multiple	0.349101	1	0.0416667	0.0257785	1.61633
MCF7_-E2_only_Expanded	REACTOME_CLASS_I_MHC_MEDIATED_ANTIGEN_PROCESSING_PRESENTATION	0.385241	1	0.0416667	0.0299308	1.3921
MCF7_-E2_only_Expanded	REACTOME_SIGNALING_BY_RHO_GTPASES	0.417243	1	0.0416667	0.034083	1.2225
MCF7_-E2_only_Expanded	REACTOME_NEUTROPHIL_DEGRANULATION	0.441777	1	0.0416667	0.0377163	1.10474
MCF7_-E2_only_Expanded	REACTOME_CELL_CYCLE_MITOTIC	0.450814	1	0.0416667	0.0394464	1.05629
MCF7_-E2_only_Expanded	REACTOME_CELLULAR_RESPONSES_TO_EXTERNAL_STIMULI	0.475798	1	0.0416667	0.0437716	0.95191
MCF7_-E2_only_Expanded	REACTOME_CELL_CYCLE	0.499562	1	0.0416667	0.0484429	0.860119
MCF7_-E2_only_Expanded	REACTOME_TRANSPORT_OF_SMALL_MOLECULES	0.532502	1	0.0416667	0.0560554	0.743313
MCF7_-E2_only_Expanded	Mutated_metUp_Single	0.532502	1	0.0416667	0.0565744	0.736493
MCF7_-E2_only_Expanded	REACTOME_METABOLISM_OF_LIPIDS	0.537003	1	0.0416667	0.0584775	0.712525
MCF7_-E2_only_Expanded	LTED_Exhausted	0.673324	1	0.0416667	0.131315	0.317303
MCF7_-E2_only_Expanded	Essential_Genes	0.675587	3	0.125	0.271453	0.460484
