# Supplementary material for: Genetic and epigenetic driven variation in regulatory regions activity contribute to adaptation and evolution under endocrine treatment
Source: Research Square preprint supplement (doi:10.21203/rs.3.rs-1432636/v1), 2022-03-30
Supplement: Supplementary file 5 [file b9d2505ef8b6169df8c46df3.xlsx]

## Sheet: S10.1
chrom	start	end	SNV_total	SNV_pathogenic	pvalue	qvalue	closest_gene	closest_gene_distance
chr1	15836873	15837805	3	2	0.0580678	1	SPEN	-10524
chr1	26619719	26621992	3	2	0.0580678	1	LOC105376888	-61647
chr1	65067496	65068496	2	2	0.0180745	1	JAK1	-250
chr1	148388281	148389302	4	2	0.117063	1	MIR6077	510
chr1	160261118	160262487	2	2	0.0180745	1	DCAF8	685
chr1	203326896	203328322	6	2	0.269819	1	BTG2	22074
chr1	231039069	231040249	2	2	0.0180745	1	FAM89A	590
chr1	234609018	234610275	2	2	0.0180745	1	IRF2BP2	-121
chr1	242475408	242475526	2	2	0.0180745	1	LOC105373234	18554
chr10	62050137	62050702	3	2	0.0580678	1	ARID5B	-468
chr10	62050871	62051137	2	2	0.0180745	1	ARID5B	117
chr10	110871044	110872044	3	2	0.0580678	1	PDCD4	-250
chr11	67117638	67118268	3	2	0.0580678	1	LOC107984341	834
chr11	67995702	67995820	2	2	0.0180745	1	UNC93B1	7343
chr11	67996605	67996723	2	2	0.0180745	1	UNC93B1	6440
chr11	69148030	69148407	2	2	0.0180745	1	LOC107984345	-7477
chr11	69148480	69148982	2	2	0.0180745	1	LOC107984345	-6964
chr12	57764686	57767096	2	2	0.0180745	1	CYP27B1	1302
chr14	37587785	37589127	2	2	0.0180745	1	FOXA1	6401
chr15	40281463	40281730	2	2	0.0180745	1	ANKRD63	990
chr15	40281867	40282618	2	2	0.0180745	1	ANKRD63	344
chr16	401857	402776	2	2	0.0180745	1	DECR2	459
chr16	3046680	3047677	2	2	0.0180745	1	MMP25	-346
chr16	4314760	4317781	2	2	0.0180745	1	GLIS2	72
chr16	70454594	70455469	2	2	0.0180745	1	FUK	305
chr16	89815668	89816657	3	3	0.00474338	0.388957	FANCA	-176
chr17	38673426	38674934	2	2	0.0180745	1	C17orf96	754
chr17	48526934	48528042	2	2	0.0180745	1	LOC105371808	19
chr17	49677913	49678580	2	2	0.0180745	1	SPOP	-83
chr17	57986758	57989004	2	2	0.0180745	1	VEZF1	48
chr17	65055524	65057315	5	3	0.0445417	1	GNA13	177
chr17	75033532	75035668	3	3	0.00474338	0.388957	KCTD2	2034
chr17	77957442	77960190	3	2	0.0580678	1	TNRC6C	-16167
chr17	82238067	82239293	2	2	0.0180745	1	MIR6787	2013
chr17	82239401	82239637	2	2	0.0180745	1	MIR6787	2852
chr19	1871317	1871435	2	2	0.0180745	1	KLF16	-7811
chr19	1872366	1872879	2	2	0.0180745	1	KLF16	-9057
chr19	5827568	5829790	2	2	0.0180745	1	NRTN	4873
chr19	15377726	15378924	3	2	0.0580678	1	AKAP8	931
chr19	18279035	18280907	4	3	0.0187376	1	JUND	1685
chr19	47109548	47110217	2	2	0.0180745	1	ZC3H4	985
chr19	47110437	47110896	2	2	0.0180745	1	ZC3H4	201
chr19	47111003	47111621	2	2	0.0180745	1	ZC3H4	-445
chr19	47111848	47113752	2	2	0.0180745	1	ZC3H4	-338
chr2	43224180	43226210	3	3	0.00474338	0.388957	ZFP36L2	1411
chr2	205682499	205683103	2	2	0.0180745	1	NRP2	302
chr2	205683427	205683990	2	2	0.0180745	1	NRP2	1209
chr2	218399754	218401323	2	2	0.0180745	1	CTDSP1	134
chr20	33646951	33647320	3	2	0.0580678	1	NECAB3	15002
chr20	33647506	33648981	4	2	0.117063	1	NECAB3	13894
chr20	35741391	35742964	2	2	0.0180745	1	RBM39	83
chr20	35743001	35743086	2	2	0.0180745	1	RBM39	-707
chr20	38164630	38165823	2	2	0.0180745	1	LOC107987281	-48
chr20	38165986	38166179	2	2	0.0180745	1	TGM2	426
chr20	58840045	58840849	5	2	0.189585	1	GNAS	-348
chr20	58840978	58841851	3	2	0.0580678	1	GNAS	-187
chr20	62804476	62804594	2	2	0.0180745	1	OGFR	-289
chr20	62804824	62805587	2	2	0.0180745	1	OGFR	381
chr21	34888440	34889440	6	2	0.269819	1	RUNX1	-250
chr22	50190477	50191918	2	2	0.0180745	1	TRABD	531
chr22	50191997	50192841	2	2	0.0180745	1	TRABD	1753
chr3	39384345	39384463	2	2	0.0180745	1	SLC25A38	1016
chr3	55484373	55484577	2	2	0.0180745	1	WNT5A	518
chr3	55484945	55485819	2	2	0.0180745	1	WNT5A	-111
chr3	55485827	55487642	2	2	0.0180745	1	WNT5A	908
chr3	183883490	183885015	2	2	0.0180745	1	PARL	647
chr4	73067969	73069759	2	2	0.0180745	1	COX18	862
chr5	473965	474210	3	2	0.0580678	1	LOC100288152	852
chr5	474932	475256	3	2	0.0580678	1	LOC100288152	1859
chr5	108380463	108382194	2	2	0.0180745	1	FBXL17	764
chr6	34543308	34544480	2	2	0.0180745	1	SPDEF	9433
chr6	44256046	44256166	2	2	0.0180745	1	SLC35B2	1246
chr6	44256335	44257352	2	2	0.0180745	1	SLC35B2	509
chr6	163413735	163416989	2	2	0.0180745	1	QKI	227
chr7	47480123	47481594	2	2	0.0180745	1	TNS3	427
chr8	53880871	53882208	2	2	0.0180745	1	RGS20	668
chr8	80872741	80873080	2	2	0.0180745	1	ZNF704	1475
chr8	80873192	80874781	2	2	0.0180745	1	ZNF704	399
chr8	97277081	97277948	2	2	0.0180745	1	TSPYL5	434
chr9	129479045	129479598	3	2	0.0580678	1	LINC00963	-9338
chr9	129480186	129480831	3	2	0.0580678	1	LINC00963	-8151
chr9	136050450	136052856	3	2	0.0580678	1	NACC2	195

## Sheet: S10.2
gene_set	overlap_mut_binom_q	overlap_mut_binom_p	overlap_mut_pathogenic	overlap_mut_total	overlap_genes
GO_STEM_CELL_DIFFERENTIATION	0.0387752	1.27382e-05	29	55	CDK6; ESR1; FBXL17; FGFR2; FOXA1; HES1; HIF1A; NRP2; NRTN; PSMA6; PSMC1; PSMD3; RUNX1; SEMA4B; SFRP1; SOX18; STAT3; TBX2; ZFP36L2
REACTOME_NEDDYLATION	0.0392154	6.60192e-05	16	26	BIRC5; CUL3; CUL4B; DCAF8; FBXL15; FBXO17; FBXO31; FEM1B; HIF1A; PSMA6; PSMC1; PSMD3; PUM2; RNF7; SKP1
GO_POSITIVE_REGULATION_OF_CELL_CELL_ADHESION_MEDIATED_BY_CADHERIN	0.260889	8.57342e-05	6	6	FLOT1; FOXA1; WNT5A
GO_REGULATION_OF_CELL_CELL_ADHESION_MEDIATED_BY_CADHERIN	0.260889	8.57342e-05	6	6	FLOT1; FOXA1; WNT5A
GO_CELL_CELL_ADHESION_MEDIATED_BY_CADHERIN	0.472144	0.000155259	7	8	CDH3; FLOT1; FOXA1; WNT5A
GO_DOPAMINERGIC_NEURON_DIFFERENTIATION	0.576531	0.000189648	8	10	FOXA1; HIF1A; SFRP1; VEGFA; WNT5A
GO_CELLULAR_TRANSITION_METAL_ION_HOMEOSTASIS	0.992802	0.000326687	5	5	HIF1A; PICALM; SKP1; SLC39A12; TFR2
GO_PROTEIN_INSERTION_INTO_MITOCHONDRIAL_MEMBRANE	0.992802	0.000326687	5	5	COX18; HSPA4; TP53; YWHAB
GO_SCF_DEPENDENT_PROTEASOMAL_UBIQUITIN_DEPENDENT_PROTEIN_CATABOLIC_PROCESS	1	0.000378672	11	17	CUL3; CUL4B; FBXL15; FBXL17; FBXO31; PSMA6; PSMC1; PSMD3; RNF7; SKP1
GO_RESPONSE_TO_STARVATION	1	0.000526039	15	27	CAD; CDKN1A; CPEB4; DHODH; EIF2AK4; EIF4EBP1; HNRNPL; MAP1LC3A; NUAK2; PIK3C2B; PPM1D; SFRP1; TP53; WDR24; ZFP36
GO_NEGATIVE_REGULATION_OF_EMBRYONIC_DEVELOPMENT	1	0.000528376	6	7	NRARP; TBX2; WNT5A
GO_FOREBRAIN_NEURON_DEVELOPMENT	1	0.000595894	7	9	ARX; FGFR2; NRP2; WNT5A
GO_FIBROBLAST_PROLIFERATION	1	0.000676391	16	30	BMI1; CD74; CDK6; CDKN1A; DAB2IP; EGFR; ESR1; FBRS; MORC3; NUPR1; PARP10; SFRP1; TP53; WNT5A; ZMIZ1
GO_BRANCHING_MORPHOGENESIS_OF_AN_EPITHELIAL_TUBE	1	0.000714652	22	46	CELSR1; ESR1; FGFR2; FOXA1; FOXD1; GLI2; GNA13; GZF1; HOXB7; MAGED1; NRARP; PAK1; SRC; VEGFA; WNT5A
GO_SKIN_DEVELOPMENT	1	0.00105083	28	64	CDH3; CELSR1; CLDN4; CYP27B1; EGFR; FGFR2; FOXN1; FRAS1; FZD6; GNAS; JUP; KAZN; KRT8; KRTAP5-1; NUMA1; PKP3; RUNX1; SOX18; TFAP2B; WNT5A; ZFP36
GO_MOLTING_CYCLE_PROCESS	1	0.00115177	12	21	CDH3; CELSR1; EGFR; FGFR2; FOXN1; FZD6; LRIG1; NUMA1; SOX18; WNT5A
GO_POSITIVE_REGULATION_OF_EPITHELIAL_CELL_DIFFERENTIATION	1	0.00120117	9	14	CYP27B1; ETV2; FOXN1; NUMA1; SFRP4; SULT2B1; VEZF1
GO_CELLULAR_IRON_ION_HOMEOSTASIS	1	0.00124483	4	4	HIF1A; PICALM; SKP1; TFR2
GO_PROTEIN_QUALITY_CONTROL_FOR_MISFOLDED_OR_INCOMPLETELY_SYNTHESIZED_PROTEINS	1	0.00124483	4	4	CUL3; FBXL17; NGLY1
GO_RESPONSE_TO_GRANULOCYTE_MACROPHAGE_COLONY_STIMULATING_FACTOR	1	0.00124483	4	4	ZFP36; ZFP36L2
GO_POSITIVE_REGULATION_OF_EPIDERMIS_DEVELOPMENT	1	0.00144554	8	12	CYP27B1; FOXN1; NUMA1; SFRP4; SULT2B1; WNT5A
GO_PROTEIN_INSERTION_INTO_MEMBRANE	1	0.00144554	8	12	COX18; EGFR; HSPA4; REEP1; TP53; WRB; YWHAB
GO_POST_TRANSLATIONAL_PROTEIN_MODIFICATION	1	0.00147146	18	37	CUL3; CUL4B; DCAF8; ESCO1; FAM20C; FBXL15; FBXO17; FBXO31; FEM1B; HIF1A; MEN1; PRSS23; PSMA6; PSMC1; PSMD3; RNF7; SKP1
GO_DIENCEPHALON_DEVELOPMENT	1	0.00167922	7	10	ARX; GLI2; HES1; NRP2; WNT5A
GO_BRANCH_ELONGATION_OF_AN_EPITHELIUM	1	0.0017724	5	6	ESR1; FGFR2; WNT5A
GO_COCHLEA_DEVELOPMENT	1	0.0017724	5	6	GABRA5; GLI2; HES1; WNT5A
GO_NEGATIVE_REGULATION_OF_VASCULAR_SMOOTH_MUSCLE_CELL_PROLIFERATION	1	0.0017724	5	6	CDKN1A; CDKN1B; PDCD4; TPM1
GO_PYRIMIDINE_NUCLEOSIDE_MONOPHOSPHATE_BIOSYNTHETIC_PROCESS	1	0.0017724	5	6	CAD; DCTD; DHODH; UCKL1
GO_CELL_FATE_COMMITMENT	1	0.00177719	26	60	ARHGEF2; ARX; ETV2; FGFR2; FOXA1; FOXN1; GLI2; HES1; NOTCH3; NR2F2; PAF1; RARA; SFRP1; SOX18; SPDEF; STAT3; TBX2; WNT5A
GO_EPITHELIAL_CELL_MATURATION	1	0.00183428	6	8	CDKN1A; FEM1B; FOXA1; HIF1A
GO_NEGATIVE_REGULATION_OF_FIBROBLAST_PROLIFERATION	1	0.00183428	6	8	DAB2IP; MORC3; NUPR1; PARP10; SFRP1; TP53
GO_NEGATIVE_REGULATION_OF_SMOOTH_MUSCLE_CELL_PROLIFERATION	1	0.00183428	6	8	ANG; CDKN1A; CDKN1B; PDCD4; TPM1
REACTOME_AKT_PHOSPHORYLATES_TARGETS_IN_THE_CYTOSOL	1	0.00183428	6	8	AKT1S1; AKT2; CDKN1A; CDKN1B; GSK3A; MDM2
REACTOME_CONSTITUTIVE_SIGNALING_BY_AKT1_E17K_IN_CANCER	1	0.00183428	6	8	AKT1S1; AKT2; CDKN1A; CDKN1B; GSK3A; MDM2
GO_LUNG_EPITHELIUM_DEVELOPMENT	1	0.00191541	10	17	FGFR2; FOXA1; SPDEF; THRA
REACTOME_TP53_REGULATES_METABOLIC_GENES	1	0.00191541	10	17	AKT2; COX18; COX6C; DDIT4; TNRC6C; TP53; TXN; YWHAB
GO_REGULATION_OF_CELL_CYCLE	1	0.00211993	84	244	ACTB; AKAP9; AKT2; AURKAIP1; BCL6; BCR; BIRC6; BMI1; BTG2; CCNE1; CDK5RAP1; CDK6; CDKN1A; CDKN1B; CTDSP1; CTDSP2; CUL3; CUL4B; DAB2IP; EGFR; EIF2AK4; EIF4EBP1; FBXO31; FEM1B; FGFR2; FOXA1; GADD45GIP1; GDPD5; HES1; HSPA2; IGF2; JUNB; JUND; KAT2B; MAP10; MDM2; MEN1; MEPCE; MUC1; NACC2; NR2F2; NUMA1; NUPR1; PAF1; PDCD4; PHC3; PKN2; PRKCA; PSMA6; PSMC1; PSMD3; RARA; RHOB; RINT1; SERTAD1; SFRP1; SKP1;…
GO_OUTFLOW_TRACT_MORPHOGENESIS	1	0.00225858	15	30	ELN; FGFR2; HES1; HIF1A; NPY1R; NRP2; RARA; SOX18; TBX2; VEGFA; WNT5A
GO_POSITIVE_REGULATION_OF_ENDOTHELIAL_CELL_PROLIFERATION	1	0.0029978	14	28	ANG; EGFL7; EGR3; HIF1A; NRARP; NRP2; PRKCA; STAT3; VEGFA; WNT5A; ZNF580
GO_STEM_CELL_DIVISION	1	0.00310428	8	13	ARHGEF2; CUL3; FGFR2; PRDM15; ZFP36L2
GO_MOLTING_CYCLE	1	0.00334539	12	23	CDH3; CELSR1; EGFR; FGFR2; FOXN1; FZD6; LRIG1; NUMA1; SOX18; WNT5A
GO_CELL_CYCLE	1	0.00365318	113	346	ACTB; AKAP8; AKAP9; AKT2; ARHGEF2; ARL8A; AURKAIP1; BCL6; BCR; BIRC5; BIRC6; BMI1; BTG2; CCNE1; CDK5RAP1; CDK6; CDKN1A; CDKN1B; CEP55; CTDSP1; CTDSP2; CUL3; CUL4B; CYP27B1; DAB2IP; EGFR; EIF2AK4; EIF4EBP1; ESCO1; FANCA; FBXL15; FBXO31; FEM1B; FGFR2; FOXA1; GADD45GIP1; GDPD5; HES1; HFM1; HSPA2; IGF2; JUNB; JUND; KAT2B; LMNA; MAP10; MDM2; MEN1; MEPCE; MUC1; MYH9; NACC2; NR2F2; NR3C1; NTMT1; NUMA1; …
GO_MORPHOGENESIS_OF_AN_EPITHELIAL_FOLD	1	0.00387652	7	11	EGFR; FGFR2; GLI2; HIF1A; WNT5A
GO_CELLULAR_RESPONSE_TO_EXTRACELLULAR_STIMULUS	1	0.00412885	17	37	CDKN1A; CPEB4; CYP27B1; EIF2AK4; FOS; FYN; HNRNPL; MAP1LC3A; MDM2; NUAK2; PIK3C2B; PIM1; PPM1D; SFRP1; TP53; WDR24
GO_POSITIVE_REGULATION_OF_CELL_DEATH	1	0.00418974	51	141	ADORA1; ARHGEF12; ARHGEF2; ARHGEF4; BCL6; CAV1; CDKN1A; CDKN1B; DAB2IP; DDIT4; DFFA; DHODH; DLC1; FOS; FOXA1; FYN; GNA13; GSK3A; HIP1; ING3; ITM2C; LRP1; MAGED1; NACC2; NUPR1; PDCD4; PICALM; PLEKHF1; RHOB; SERINC3; SFRP1; SFRP4; SPDEF; SRC; TFAP2B; TNFRSF1A; TOP2A; TP53; WNT5A; YWHAB
GO_CELLULAR_RESPONSE_TO_STARVATION	1	0.00443978	11	21	CDKN1A; CPEB4; EIF2AK4; HNRNPL; MAP1LC3A; NUAK2; PIK3C2B; PPM1D; SFRP1; TP53; WDR24
GO_MIDBRAIN_DEVELOPMENT	1	0.00455475	9	16	ACTB; FGFR2; FZD6; HES1; SFRP1; SYNGR3; WNT5A
GO_AXIS_ELONGATION	1	0.00472386	6	9	ESR1; FGFR2; SFRP1; WNT5A
GO_ENTEROENDOCRINE_CELL_DIFFERENTIATION	1	0.00472386	6	9	CDK6; GSK3A; HES1; MEN1; WNT5A
GO_INTESTINAL_EPITHELIAL_CELL_DEVELOPMENT	1	0.00472386	6	9	CDKN1A; HIF1A; SPDEF
GO_LATERAL_SPROUTING_FROM_AN_EPITHELIUM	1	0.00472386	6	9	CELSR1; FGFR2; GLI2; WNT5A
GO_NEURON_PROJECTION_EXTENSION_INVOLVED_IN_NEURON_PROJECTION_GUIDANCE	1	0.00472386	6	9	NRP2; SEMA4B; VEGFA; WNT5A
GO_TRANSITION_METAL_ION_HOMEOSTASIS	1	0.00472386	6	9	CUTC; HIF1A; PICALM; SKP1; SLC39A12; TFR2
GO_3_PHOSPHOADENOSINE_5_PHOSPHOSULFATE_BIOSYNTHETIC_PROCESS	1	0.00474338	3	3	PAPSS2; SLC35B2
GO_BRANCH_ELONGATION_INVOLVED_IN_MAMMARY_GLAND_DUCT_BRANCHING	1	0.00474338	3	3	ESR1; WNT5A
GO_CD40_SIGNALING_PATHWAY	1	0.00474338	3	3	FANCA
GO_CELL_PROLIFERATION_IN_MIDBRAIN	1	0.00474338	3	3	FZD6; WNT5A
GO_DOPAMINERGIC_NEURON_AXON_GUIDANCE	1	0.00474338	3	3	CELSR3; WNT5A
GO_EPITHELIAL_MESENCHYMAL_CELL_SIGNALING	1	0.00474338	3	3	FOXA1
GO_ESTABLISHMENT_OF_PROTEIN_LOCALIZATION_TO_MITOCHONDRIAL_MEMBRANE	1	0.00474338	3	3	COX18; HSPA4
GO_HEME_BIOSYNTHETIC_PROCESS	1	0.00474338	3	3	CPOX; SLC25A38
GO_INTRACELLULAR_PROTEIN_TRANSMEMBRANE_TRANSPORT	1	0.00474338	3	3	AKT2; BCR; C2CD5
GO_MITOTIC_CELL_CYCLE_ARREST	1	0.00474338	3	3	CDKN1A; CDKN1B; GADD45GIP1
GO_NEURON_PROJECTION_ARBORIZATION	1	0.00474338	3	3	DLG4; WNT5A
GO_POSITIVE_REGULATION_OF_LEUKOCYTE_APOPTOTIC_PROCESS	1	0.00474338	3	3	TP53; WNT5A
GO_POSITIVE_REGULATION_OF_LYMPHOCYTE_APOPTOTIC_PROCESS	1	0.00474338	3	3	TP53; WNT5A
GO_POSITIVE_REGULATION_OF_T_CELL_APOPTOTIC_PROCESS	1	0.00474338	3	3	TP53; WNT5A
GO_POSITIVE_REGULATION_OF_THYMOCYTE_APOPTOTIC_PROCESS	1	0.00474338	3	3	TP53; WNT5A
GO_PYRIMIDINE_CONTAINING_COMPOUND_METABOLIC_PROCESS	1	0.00474338	3	3	DCTD; THTPA
GO_REGULATION_OF_CD40_SIGNALING_PATHWAY	1	0.00474338	3	3	FANCA
GO_REGULATION_OF_GLYCOGEN_STARCH_SYNTHASE_ACTIVITY	1	0.00474338	3	3	GSK3A; IGF2; PPP1R3F
GO_REGULATION_OF_NEURON_PROJECTION_ARBORIZATION	1	0.00474338	3	3	DLG4; WNT5A
GO_TETRAPYRROLE_BIOSYNTHETIC_PROCESS	1	0.00474338	3	3	CPOX; SLC25A38
REACTOME_ACTIVATION_OF_BH3_ONLY_PROTEINS	1	0.00474338	3	3	AKT2; TP53; YWHAB
REACTOME_SIGNALING_BY_CYTOSOLIC_FGFR1_FUSION_MUTANTS	1	0.00474338	3	3	BCR; MYO18A; STAT3
REACTOME_TRANSPORT_AND_SYNTHESIS_OF_PAPS	1	0.00474338	3	3	PAPSS2; SLC35B2
GO_NOTCH_SIGNALING_PATHWAY	1	0.00523408	25	61	ARRDC1; BCL6; CDK6; CDKN1B; EGFL7; EGFR; ELF3; ETV2; FOXA1; GDPD5; HES1; KAT2B; NOTCH3; NRARP; S1PR3; SPEN; STAT3; TBX2; ZMIZ1
GO_REGULATION_OF_SMOOTHENED_SIGNALING_PATHWAY	1	0.00530839	12	24	DISP1; FBXL17; FGFR2; FOXA1; GLI2; GLIS2; SFRP1
GO_RESPONSE_TO_FIBROBLAST_GROWTH_FACTOR	1	0.00546277	16	35	ANOS1; EGR3; FAM20C; FGFR2; HNRNPF; HNRNPH1; HNRNPM; SFRP1; SPRED2; WNT5A; ZFP36; ZFP36L2
GO_FATTY_ACID_BETA_OXIDATION	1	0.00550449	5	7	AKT2; CPT1A; DECR2; ETFB
GO_MORPHOGENESIS_OF_AN_EPITHELIAL_BUD	1	0.00550449	5	7	FGFR2; GLI2; WNT5A
GO_NEGATIVE_REGULATION_OF_STEM_CELL_DIFFERENTIATION	1	0.00550449	5	7	HES1; STAT3; ZFP36L2
GO_REGULATION_OF_AXON_GUIDANCE	1	0.00550449	5	7	SEMA4B; VEGFA; WNT5A; ZSWIM4
GO_ESTABLISHMENT_OF_PLANAR_POLARITY_INVOLVED_IN_NEURAL_TUBE_CLOSURE	1	0.00583554	4	5	CELSR1; SFRP1; WNT5A
GO_ESTABLISHMENT_OF_PLANAR_POLARITY_OF_EMBRYONIC_EPITHELIUM	1	0.00583554	4	5	CELSR1; SFRP1; WNT5A
GO_PITUITARY_GLAND_DEVELOPMENT	1	0.00583554	4	5	GLI2; HES1; WNT5A
GO_POSITIVE_REGULATION_OF_TRANSCRIPTION_FROM_RNA_POLYMERASE_II_PROMOTER_IN_RESPONSE_TO_STRESS	1	0.00583554	4	5	HIF1A; MUC1; TP53; VEGFA
GO_PROSTATE_GLANDULAR_ACINUS_MORPHOGENESIS	1	0.00583554	4	5	ESR1; FGFR2; SFRP1
GO_REGULATION_OF_THYMOCYTE_APOPTOTIC_PROCESS	1	0.00583554	4	5	HIF1A; TP53; WNT5A
REACTOME_INTRINSIC_PATHWAY_FOR_APOPTOSIS	1	0.00583554	4	5	AKT2; STAT3; TP53; YWHAB
REACTOME_NEGATIVE_REGULATION_OF_TCF_DEPENDENT_SIGNALING_BY_WNT_LIGAND_ANTAGONISTS	1	0.00583554	4	5	SFRP1; SOST; WNT5A
GO_GLUCOSE_METABOLIC_PROCESS	1	0.00590057	10	19	AKT2; CPT1A; GSK3A; IGF2; INPPL1; MIDN; NPY1R; PPP1R3F; SRC; TFAP2B
GO_NEURAL_CREST_CELL_DIFFERENTIATION	1	0.00590057	10	19	FBXL17; HES1; HIF1A; NRP2; NRTN; SEMA4B; SFRP1
GO_DEFINITIVE_HEMOPOIESIS	1	0.00595894	8	14	BCR; HOXB3; ZFP36L2
GO_FOREBRAIN_NEURON_DIFFERENTIATION	1	0.00595894	8	14	ARX; FGFR2; HES1; NRP2; WNT5A
GO_LUNG_CELL_DIFFERENTIATION	1	0.00595894	8	14	FOXA1; SPDEF; THRA
GO_POSITIVE_REGULATION_OF_CELL_DIVISION	1	0.00595894	8	14	CUL3; FGFR2; IGF2; MAP10; PKN2; SVIL; VEGFA
GO_REGULATION_OF_JUN_KINASE_ACTIVITY	1	0.00595894	8	14	DAB2IP; PAK1; PDCD4; PTPN1; SFRP1; WNT5A
GO_EPITHELIAL_TUBE_MORPHOGENESIS	1	0.00599142	33	86	CELSR1; DLC1; ESR1; FGFR2; FOXA1; FOXD1; FZD6; GLI2; GNA13; GZF1; HES1; HIF1A; HOXB7; MAGED1; NRARP; PAK1; RARA; RHOB; SFRP1; SOX18; SRC; TBX2; VEGFA; WNT5A
GO_FEMALE_SEX_DIFFERENTIATION	1	0.00606425	13	27	ANG; ARID5B; ESR1; FANCA; NUPR1; SFRP1; SRC; VEGFA; WNT5A
REACTOME_CELLULAR_SENESCENCE	1	0.00606425	13	27	BMI1; CCNE1; CDK6; CDKN1A; CDKN1B; FOS; MDM2; PHC3; STAT3; TNRC6C; TP53; TXN
GO_EPITHELIUM_DEVELOPMENT	1	0.00743326	83	251	AKT2; ARX; CARMIL2; CAV1; CDH3; CDK6; CDKN1A; CDKN1B; CDX2; CELSR1; CELSR3; CPT1A; CYP27B1; DHRS9; DLC1; DLX3; EGFR; ELF3; ESR1; ETV2; FAM20C; FEM1B; FGFR2; FOXA1; FOXD1; FOXN1; FRAS1; FZD6; GLI2; GNA13; GSK3A; GZF1; HES1; HIF1A; HOXB7; JUP; KAZN; KRT8; KRTAP5-1; MAGED1; MEN1; NR2F2; NRARP; NUMA1; PAK1; PKP3; PSMA6; PSMC1; PSMD3; RARA; RHOB; RUNX1; S1PR3; SFRP1; SFRP4; SOX18; SPDEF; SRC; SULT2B1;…
GO_ENDOTHELIAL_CELL_PROLIFERATION	1	0.00766656	16	36	ANG; CAV1; EGFL7; EGR3; HIF1A; NR2F2; NRARP; NRP2; PRKCA; STAT3; VEGFA; WNT5A; ZNF580
GO_GLANDULAR_EPITHELIAL_CELL_DIFFERENTIATION	1	0.00766656	16	36	CDK6; FGFR2; FOXA1; GSK3A; HES1; MEN1; RARA; SPDEF; WNT5A
GO_REGULATION_OF_DNA_BINDING_TRANSCRIPTION_FACTOR_ACTIVITY	1	0.00769772	31	81	ARHGEF2; ARID5B; CAV1; DAB2IP; EIF2AK4; ESR1; FANCA; FLOT1; FOS; FOXA1; FZD6; GLIS2; HDAC5; JUP; MEN1; PARP10; PIM1; PSMA6; SFRP4; STAT3; TRIM8; USP7; VEGFA; WNT5A
HALLMARK_HEDGEHOG_SIGNALING	0.357241	0.0077661	7	12	ACHE; CDK6; CELSR1; MYH9; NRP2; VEGFA
GO_INTESTINAL_EPITHELIAL_CELL_DIFFERENTIATION	1	0.0077661	7	12	CDKN1A; CDX2; HIF1A; SPDEF
GO_MAMMARY_GLAND_DUCT_MORPHOGENESIS	1	0.0077661	7	12	ESR1; FGFR2; GLI2; SRC; WNT5A
GO_SMOOTH_MUSCLE_CELL_DIFFERENTIATION	1	0.0077661	7	12	FGFR2; HES1; PDCD4; SMARCD3; VEGFA
GO_REGULATION_OF_EPITHELIAL_CELL_DIFFERENTIATION	1	0.00826341	18	42	CAV1; CDKN1B; CYP27B1; ETV2; FOXN1; GSK3A; HES1; NUMA1; RUNX1; S1PR3; SFRP4; SULT2B1; TNFRSF1A; VEZF1; ZFP36
GO_MONOSACCHARIDE_METABOLIC_PROCESS	1	0.00948023	10	20	AKT2; CPT1A; GSK3A; IGF2; INPPL1; MIDN; NPY1R; PPP1R3F; SRC; TFAP2B
GO_NEGATIVE_REGULATION_OF_MAP_KINASE_ACTIVITY	1	0.00948023	10	20	CAV1; DAB2IP; DUSP16; DUSP8; PDCD4; PTPN1; SFRP1; SPRED2; UCHL1
GO_ENDOCRINE_SYSTEM_DEVELOPMENT	1	0.00959913	14	31	ARID5B; CDK6; GLI2; GSK3A; HES1; HOXB3; MEN1; THRA; WNT5A
GO_MITOCHONDRIAL_TRANSPORT	1	0.00959913	14	31	ABCB10; COX18; CPT1A; GSK3A; HSPA4; PARL; SLC25A14; SLC25A38; STAT3; TP53; YWHAB
REACTOME_TRANSLATION	1	0.00959913	14	31	AURKAIP1; EEF1G; EIF3B; EIF4A1; EIF4EBP1; GADD45GIP1; MRPL4; MRPS22; MRPS25; PABPC1; PPA2; RPL22; RPN1; SSR1
GO_ENDOCRINE_PANCREAS_DEVELOPMENT	1	0.010052	6	10	CDK6; GSK3A; HES1; MEN1; WNT5A
GO_EPITHELIAL_TUBE_BRANCHING_INVOLVED_IN_LUNG_MORPHOGENESIS	1	0.010052	6	10	CELSR1; FGFR2; FOXA1
GO_LIPID_OXIDATION	1	0.010052	6	10	ACSM1; AKT2; CPT1A; DECR2; ETFB
GO_NEGATIVE_REGULATION_OF_CYCLIN_DEPENDENT_PROTEIN_KINASE_ACTIVITY	1	0.010052	6	10	CDK5RAP1; CDKN1A; CDKN1B; KAT2B; MEN1; NR2F2
GO_PIGMENT_BIOSYNTHETIC_PROCESS	1	0.010052	6	10	CDH3; CPOX; SLC25A38; WNT5A
GO_PIGMENT_METABOLIC_PROCESS	1	0.010052	6	10	CDH3; CPOX; SLC25A38; WNT5A
GO_PROTEIN_TARGETING_TO_MITOCHONDRION	1	0.010052	6	10	COX18; GSK3A; HSPA4; PARL
GO_RESPONSE_TO_AMINO_ACID_STARVATION	1	0.010052	6	10	CDKN1A; EIF2AK4; EIF4EBP1; HNRNPL; MAP1LC3A; WDR24
REACTOME_THE_ROLE_OF_GTSE1_IN_G2_M_PROGRESSION_AFTER_G2_CHECKPOINT	1	0.010052	6	10	CDKN1A; PSMA6; PSMC1; PSMD3; TP53; TUBA1B
GO_POSITIVE_REGULATION_OF_NEURON_DEATH	1	0.0104707	8	15	ADORA1; DDIT4; FOS; FYN; PICALM; TFAP2B; WNT5A
REACTOME_G1_S_DNA_DAMAGE_CHECKPOINTS	1	0.0104707	8	15	CCNE1; CDKN1A; CDKN1B; MDM2; PSMA6; PSMC1; PSMD3; TP53
GO_COLUMNAR_CUBOIDAL_EPITHELIAL_CELL_DEVELOPMENT	1	0.0108253	11	23	CDK6; CDKN1A; GSK3A; HIF1A; RARA; SPDEF; WNT5A
GO_DEVELOPMENT_OF_PRIMARY_FEMALE_SEXUAL_CHARACTERISTICS	1	0.0108253	11	23	ANG; ARID5B; ESR1; FANCA; NUPR1; SFRP1; SRC; VEGFA
GO_MAMMARY_GLAND_MORPHOGENESIS	1	0.0108253	11	23	CAV1; ELF3; ESR1; FGFR2; GLI2; SRC; TBX2; WNT5A
GO_POSITIVE_REGULATION_OF_GENE_EXPRESSION	1	0.0116561	121	386	ACTB; ARHGEF2; ARID3C; ARX; ASCL5; CAMKK2; CAV1; CCNE1; CD74; CDH3; CDK5RAP1; CDK6; CDX2; DAB2IP; DAZAP1; DLX3; DYRK1A; EGFR; EGR3; EIF2AK4; ELF3; ESR1; ESRRG; ETV2; FGFR2; FHL2; FOS; FOXA1; FOXD1; FOXN1; GABPB2; GLI2; GLIS2; GSK3A; HDAC5; HES1; HIF1A; HNRNPL; HOXB3; HOXB7; IGF2; IRF2BP2; JUNB; JUND; JUP; KAT2B; KLF1; LARP4B; LMNA; MAGED1; MAZ; MDM2; MEN1; MSANTD1; MUC1; MYH9; NOTCH3; NR1D2; NR2F…
GO_POSITIVE_REGULATION_OF_CELL_CYCLE	1	0.0121202	35	96	BTG2; CCNE1; CDKN1A; CDKN1B; CUL3; CUL4B; DAB2IP; EGFR; EIF4EBP1; FGFR2; FOXA1; GDPD5; HES1; HSPA2; IGF2; MAP10; MDM2; MEPCE; MUC1; NUMA1; PAF1; PKN2; PRKCA; RARA; SLF2; SMARCD3; SRC; SVIL; TP53; WNT5A
GO_IMMUNE_SYSTEM_DEVELOPMENT	1	0.0126858	73	222	BCL6; BCR; BMI1; CD164; CD74; CDK6; CRIP2; EGR3; ETV2; FAM20C; FANCA; FGFR2; FOS; FOXN1; GLI2; GNAS; GPR171; HDAC5; HES1; HIF1A; HOXB3; HOXB7; IRF2BP2; JUNB; KAT2B; KLF1; LRRC8A; MB; MKNK2; MYH9; NRARP; PAF1; PICALM; PRKCA; PSMA6; PSMC1; PSMD3; RARA; ROGDI; RUNX1; SASH3; SFRP1; SLC25A38; SRC; STAT3; TFE3; THRA; TNFSF13; TNRC6C; TOB2; TOP2A; VEGFA; WNT5A; ZBTB24; ZFP36; ZFP36L2; ZMIZ1
GO_POSITIVE_REGULATION_OF_LIPASE_ACTIVITY	1	0.0127207	9	18	ANG; EGFR; ESR1; FGFR2; GNA13; GNAQ
GO_POSITIVE_REGULATION_OF_PHOSPHOLIPASE_ACTIVITY	1	0.0127207	9	18	ANG; EGFR; ESR1; FGFR2; GNA13; GNAQ
GO_ACTIVATION_OF_PROTEIN_KINASE_B_ACTIVITY	1	0.0128449	5	8	ANG; SRC; TXN; WNT5A
GO_ANTERIOR_POSTERIOR_AXIS_SPECIFICATION	1	0.0128449	5	8	CDX2; NRARP; WNT5A
GO_MIRNA_MEDIATED_INHIBITION_OF_TRANSLATION	1	0.0128449	5	8	MIR365B; STAT3; TNRC6C; ZFP36
GO_NEGATIVE_REGULATION_OF_EPITHELIAL_TO_MESENCHYMAL_TRANSITION	1	0.0128449	5	8	DAB2IP; FOXA1; SFRP1
GO_NUCLEOSIDE_MONOPHOSPHATE_BIOSYNTHETIC_PROCESS	1	0.0128449	5	8	CAD; DCTD; DHODH; UCKL1
GO_POSITIVE_REGULATION_OF_JUN_KINASE_ACTIVITY	1	0.0128449	5	8	DAB2IP; PAK1; PTPN1; WNT5A
GO_POSITIVE_REGULATION_OF_LEUKOCYTE_CHEMOTAXIS	1	0.0128449	5	8	CD74; VEGFA; WNT5A; ZNF580
GO_POSITIVE_REGULATION_OF_POSTTRANSCRIPTIONAL_GENE_SILENCING	1	0.0128449	5	8	EGFR; PUM2; STAT3; TP53; ZFP36
GO_REGULATION_OF_ENDOTHELIAL_CELL_DIFFERENTIATION	1	0.0128449	5	8	ETV2; S1PR3; TNFRSF1A; VEZF1
GO_REGULATION_OF_ESTABLISHMENT_OF_PROTEIN_LOCALIZATION_TO_MITOCHONDRION	1	0.0128449	5	8	GSK3A; PARL; TP53; YWHAB
GO_REGULATION_OF_LEUKOCYTE_CHEMOTAXIS	1	0.0128449	5	8	CD74; VEGFA; WNT5A; ZNF580
GO_REGULATION_OF_MULTICELLULAR_ORGANISM_GROWTH	1	0.0128449	5	8	FGFR2; IGF2; NPY1R; STAT3
GO_REGULATION_OF_SMOOTH_MUSCLE_CELL_DIFFERENTIATION	1	0.0128449	5	8	FGFR2; PDCD4; SMARCD3
REACTOME_ADHERENS_JUNCTIONS_INTERACTIONS	1	0.0128449	5	8	ACTB; ANG; CDH3; CTNND1; JUP
REACTOME_FGFR2_ALTERNATIVE_SPLICING	1	0.0128449	5	8	FGFR2; HNRNPF; HNRNPH1; HNRNPM
REACTOME_ONCOGENE_INDUCED_SENESCENCE	1	0.0128449	5	8	CDK6; MDM2; TNRC6C; TP53
REACTOME_SENESCENCE_ASSOCIATED_SECRETORY_PHENOTYPE_SASP	1	0.0128449	5	8	CDK6; CDKN1A; CDKN1B; FOS; STAT3
GO_DEFENSE_RESPONSE	1	0.0128913	70	212	ADORA1; AKAP8; ARHGEF2; BCL6; BCR; C7; CAV1; CD74; CYP27B1; DAB2IP; DDIT4; EGFR; EIF2AK4; ELF3; ESR1; FANCA; FLOT1; FOS; FOXN1; FYN; GABRA5; HDAC5; HIF1A; HLA-F; ITGB6; JAK1; LRP1; MMP25; MUC1; MYLK3; NCBP3; NR1D2; NUPR1; PAK1; PDCD4; PQBP1; PSMA6; PSMC1; PSMD3; PTPN1; PUM2; S1PR3; SERINC3; SKP1; SPATA2; SPON2; SRC; STAT3; SYNCRIP; TBKBP1; TFR2; TNFRSF1A; TRIM56; TRIM8; UNC93B1; VEZF1; WDFY1; WNT…
GO_CIRCADIAN_RHYTHM	1	0.0133936	14	32	ADORA1; CLDN4; CPT1A; DYRK1A; EGFR; EGR3; GNAQ; HNRNPL; MAGED1; NAGLU; NR1D2; NR2F6; TOP2A; TP53
GO_DORSAL_VENTRAL_PATTERN_FORMATION	1	0.0139819	7	13	DISP1; FBXL15; FOXA1; GLI2; SFRP1
GO_LUNG_ALVEOLUS_DEVELOPMENT	1	0.0139819	7	13	FGFR2; FOXA1; TNS3
REACTOME_CELL_CELL_JUNCTION_ORGANIZATION	1	0.0139819	7	13	ACTB; ANG; CDH3; CLDN19; CLDN4; CTNND1; JUP
HALLMARK_HEME_METABOLISM	0.638051	0.0141789	16	38	ARHGEF12; BTG2; CPOX; KAT2B; KLF1; NR3C1; PICALM; SLC25A38; SMOX; TNS1; VEZF1; XK; YPEL5
GO_NEGATIVE_REGULATION_OF_WNT_SIGNALING_PATHWAY	1	0.0141789	16	38	CAV1; CTNND1; CUL3; DAB2IP; FZD6; GSK3A; LRP1; PSMA6; PSMC1; PSMD3; SFRP1; SFRP4; SOST; TSKU; WNT5A
GO_MESENCHYMAL_CELL_DIFFERENTIATION	1	0.0142733	21	53	DAB2IP; FBXL17; FGFR2; FOXA1; HES1; HIF1A; NRP2; NRTN; OLFM1; PDCD4; SEMA4B; SFRP1; WNT5A
GO_OSSIFICATION	1	0.0142872	30	81	ACHE; CDK6; CYP27B1; EGFR; FAM20C; FBXL15; FGFR2; FHL2; GLI2; GNAS; HIF1A; IGF2; INPPL1; JUNB; MEN1; MN1; RRAS2; SFRP1; SND1; SOST; SYNCRIP; THRA; TOB2; WNT5A; ZBTB40
GO_DIGESTIVE_SYSTEM_DEVELOPMENT	1	0.0144638	18	44	CDKN1A; CDX2; EGFR; FGFR2; GLI2; HES1; HIF1A; IGF2; SFRP1; SPDEF; TBX2; WNT5A
GO_COFACTOR_BIOSYNTHETIC_PROCESS	1	0.0145207	10	21	CPOX; FYN; MOCS3; NADK; PARP10; PDSS1; SCD5; SLC25A38; STAT3
GO_REGULATION_OF_CELL_DIVISION	1	0.0145207	10	21	BIRC6; CUL3; FGFR2; IGF2; MAP10; PKN2; PRDM15; SVIL; VEGFA
GO_MRNA_METABOLIC_PROCESS	1	0.0151811	28	75	AURKAIP1; DAZAP1; DYRK1A; HIF1A; HNRNPF; HNRNPH1; HNRNPL; HNRNPM; LUC7L; MTPAP; NCBP3; PABPC1; PAF1; PQBP1; PRPF4B; QKI; RBM39; RNU5B-1; SF3A2; SF3B1; SOX18; STAT3; SYNCRIP; THOC2; TP53; U2AF2
GO_RESPONSE_TO_RADIATION	1	0.0156256	27	72	AKT2; CDKN1A; CUL4B; DYNLRB1; EGFR; EIF2AK4; FOS; GNAQ; GUCY2D; HIF1A; JUNB; JUND; MDM2; MEN1; NR2F6; POLG; PPM1D; RHOB; SFRP1; TICRR; TP53; TSPYL5; TXN
GO_ACTIVATION_OF_JUN_KINASE_ACTIVITY	1	0.0159934	4	6	DAB2IP; PTPN1; WNT5A
GO_BLASTODERM_SEGMENTATION	1	0.0159934	4	6	NRP2; WNT5A
GO_DECIDUALIZATION	1	0.0159934	4	6	CYP27B1; JUNB; MEN1
GO_DORSAL_VENTRAL_NEURAL_TUBE_PATTERNING	1	0.0159934	4	6	FOXA1; GLI2
GO_ESTABLISHMENT_OR_MAINTENANCE_OF_MONOPOLAR_CELL_POLARITY	1	0.0159934	4	6	CARMIL2; FSCN1; WNT5A
GO_LOBAR_BRONCHUS_DEVELOPMENT	1	0.0159934	4	6	SPDEF
GO_LOBAR_BRONCHUS_EPITHELIUM_DEVELOPMENT	1	0.0159934	4	6	SPDEF
GO_MAMMARY_GLAND_FORMATION	1	0.0159934	4	6	FGFR2; TBX2
GO_MEMBRANE_RAFT_ASSEMBLY	1	0.0159934	4	6	CAV1; EMP2; FLOT1; PACSIN2
GO_MRNA_TRANSCRIPTION	1	0.0159934	4	6	HIF1A; SOX18; STAT3; TP53
GO_NEGATIVE_REGULATION_OF_CELL_FATE_COMMITMENT	1	0.0159934	4	6	SPDEF
GO_POSITIVE_REGULATION_OF_KIDNEY_DEVELOPMENT	1	0.0159934	4	6	FOXD1; HOXB7; MAGED1; VEGFA
GO_REGULATION_OF_EPITHELIAL_TUBE_FORMATION	1	0.0159934	4	6	CELSR1; SFRP1; WNT5A
GO_REGULATION_OF_KIDNEY_DEVELOPMENT	1	0.0159934	4	6	FOXD1; HOXB7; MAGED1; VEGFA
GO_REGULATION_OF_PEPTIDYL_THREONINE_PHOSPHORYLATION	1	0.0159934	4	6	DDIT4; SPRED2; WNT5A
GO_UTERUS_DEVELOPMENT	1	0.0159934	4	6	ESR1; SRC; WNT5A
REACTOME_CYTOSOLIC_SULFONATION_OF_SMALL_MOLECULES	1	0.0159934	4	6	PAPSS2; SLC35B2; SULT2B1
REACTOME_DNA_DAMAGE_TELOMERE_STRESS_INDUCED_SENESCENCE	1	0.0159934	4	6	CCNE1; CDKN1A; CDKN1B; TP53
REACTOME_NOTCH3_INTRACELLULAR_DOMAIN_REGULATES_TRANSCRIPTION	1	0.0159934	4	6	HES1; KAT2B; MAMLD1; NOTCH3
REACTOME_REGULATION_OF_BETA_CELL_DEVELOPMENT	1	0.0159934	4	6	AKT2; HES1; KAT2B; MAMLD1
GO_MESENCHYME_DEVELOPMENT	1	0.0164938	25	66	DAB2IP; FBXL17; FGFR2; FOXA1; FOXD1; HES1; HIF1A; MDM2; NRP2; NRTN; OLFM1; PDCD4; SEMA4B; SFRP1; TBX2; WNT5A
GO_NERVE_DEVELOPMENT	1	0.0169699	12	27	GABRA5; HES1; HOXB3; LRIG1; NAV2; NRP2; NRTN
GO_NEGATIVE_REGULATION_OF_DEVELOPMENTAL_GROWTH	1	0.0171262	8	16	CDKN1A; CDKN1B; GSK3A; PAK1; SEMA4B; SFRP1; WNT5A
GO_PROTEIN_LOCALIZATION_TO_MITOCHONDRION	1	0.0171262	8	16	COX18; GSK3A; HSPA4; PARL; TP53; YWHAB
REACTOME_METABOLISM_OF_NUCLEOTIDES	1	0.0171262	8	16	CAD; DCTD; DHODH; ENTPD6; GMPR; TXN; UCKL1
GO_REGULATION_OF_EPIDERMIS_DEVELOPMENT	1	0.0177322	13	30	CDH3; CYP27B1; FOXN1; HES1; NUMA1; RUNX1; SFRP4; SULT2B1; WNT5A; ZFP36
GO_AMINE_BIOSYNTHETIC_PROCESS	1	0.0180745	2	2	SMOX; SRM
GO_ANAGEN	1	0.0180745	2	2	WNT5A
GO_ANTIBIOTIC_BIOSYNTHETIC_PROCESS	1	0.0180745	2	2	FYN; STAT3
GO_BRANCHING_INVOLVED_IN_LABYRINTHINE_LAYER_MORPHOGENESIS	1	0.0180745	2	2	FGFR2
GO_BRANCHING_MORPHOGENESIS_OF_A_NERVE	1	0.0180745	2	2	FGFR2
GO_BUD_ELONGATION_INVOLVED_IN_LUNG_BRANCHING	1	0.0180745	2	2	FGFR2
GO_CELLULAR_ALCOHOL_METABOLIC_PROCESS	1	0.0180745	2	2	CYP27B1
GO_CHEMOKINE_BIOSYNTHETIC_PROCESS	1	0.0180745	2	2	WNT5A
GO_COLLAGEN_CATABOLIC_PROCESS	1	0.0180745	2	2	MMP25
GO_COLUMNAR_CUBOIDAL_EPITHELIAL_CELL_MATURATION	1	0.0180745	2	2	CDKN1A; HIF1A
GO_CONVERGENT_EXTENSION_INVOLVED_IN_ORGANOGENESIS	1	0.0180745	2	2	WNT5A
GO_DE_NOVO_PYRIMIDINE_NUCLEOBASE_BIOSYNTHETIC_PROCESS	1	0.0180745	2	2	CAD; DHODH
GO_DEOXYRIBONUCLEOSIDE_MONOPHOSPHATE_BIOSYNTHETIC_PROCESS	1	0.0180745	2	2	DCTD
GO_DEVELOPMENT_OF_SECONDARY_FEMALE_SEXUAL_CHARACTERISTICS	1	0.0180745	2	2	WNT5A
GO_DUMP_BIOSYNTHETIC_PROCESS	1	0.0180745	2	2	DCTD
GO_EGG_ACTIVATION	1	0.0180745	2	2	WBP2NL; ZP2
GO_EMBRYONIC_CLEAVAGE	1	0.0180745	2	2	CUL3; TOP2A
GO_EPITHELIAL_CELL_PROLIFERATION_INVOLVED_IN_SALIVARY_GLAND_MORPHOGENESIS	1	0.0180745	2	2	FGFR2
GO_FAT_SOLUBLE_VITAMIN_BIOSYNTHETIC_PROCESS	1	0.0180745	2	2	CYP27B1
GO_FAT_SOLUBLE_VITAMIN_CATABOLIC_PROCESS	1	0.0180745	2	2	CYP27B1
GO_FATTY_ACID_BETA_OXIDATION_USING_ACYL_COA_OXIDASE	1	0.0180745	2	2	DECR2
GO_FOREBRAIN_MORPHOGENESIS	1	0.0180745	2	2	WNT5A
GO_G_PROTEIN_COUPLED_ACETYLCHOLINE_RECEPTOR_SIGNALING_PATHWAY	1	0.0180745	2	2	CHRM4; GNAQ
GO_G1_TO_G0_TRANSITION	1	0.0180745	2	2	CYP27B1
GO_GLYCOPROTEIN_CATABOLIC_PROCESS	1	0.0180745	2	2	MAN1B1; NGLY1
GO_GOLGI_RIBBON_FORMATION	1	0.0180745	2	2	MYO18A; VAMP4
GO_INHIBITORY_SYNAPSE_ASSEMBLY	1	0.0180745	2	2	WNT5A
GO_LACRIMAL_GLAND_DEVELOPMENT	1	0.0180745	2	2	FGFR2
GO_MAMMARY_GLAND_BRANCHING_INVOLVED_IN_THELARCHE	1	0.0180745	2	2	WNT5A
GO_NEGATIVE_REGULATION_OF_CHONDROCYTE_DIFFERENTIATION	1	0.0180745	2	2	CHADL; GLI2
GO_NEGATIVE_REGULATION_OF_COFACTOR_METABOLIC_PROCESS	1	0.0180745	2	2	FYN; STAT3
GO_NEGATIVE_REGULATION_OF_CYTOPLASMIC_TRANSLATION	1	0.0180745	2	2	CPEB2; CPEB4
GO_NEGATIVE_REGULATION_OF_SYNAPSE_ASSEMBLY	1	0.0180745	2	2	WNT5A
GO_NEGATIVE_REGULATION_OF_VITAMIN_D_BIOSYNTHETIC_PROCESS	1	0.0180745	2	2	CYP27B1
GO_NEGATIVE_REGULATION_OF_VITAMIN_METABOLIC_PROCESS	1	0.0180745	2	2	CYP27B1
GO_NUCLEOTIDE_TRANSMEMBRANE_TRANSPORT	1	0.0180745	2	2	SLC35B2
GO_OPIOID_RECEPTOR_SIGNALING_PATHWAY	1	0.0180745	2	2	OGFR
GO_POLYAMINE_BIOSYNTHETIC_PROCESS	1	0.0180745	2	2	SMOX; SRM
GO_POSITIVE_REGULATION_OF_ACTIN_FILAMENT_DEPOLYMERIZATION	1	0.0180745	2	2	CARMIL2; DSTN
GO_POSITIVE_REGULATION_OF_CHEMOKINE_BIOSYNTHETIC_PROCESS	1	0.0180745	2	2	WNT5A
GO_POSITIVE_REGULATION_OF_DNA_TEMPLATED_TRANSCRIPTION_INITIATION	1	0.0180745	2	2	ESR1; TP53
GO_POSITIVE_REGULATION_OF_GLYCOGEN_STARCH_SYNTHASE_ACTIVITY	1	0.0180745	2	2	GSK3A; IGF2
GO_POSITIVE_REGULATION_OF_HAIR_FOLLICLE_MATURATION	1	0.0180745	2	2	WNT5A
GO_POSITIVE_REGULATION_OF_INTERLEUKIN_8_SECRETION	1	0.0180745	2	2	WNT5A
GO_POSITIVE_REGULATION_OF_MEIOTIC_NUCLEAR_DIVISION	1	0.0180745	2	2	WNT5A
GO_POSITIVE_REGULATION_OF_PROTEIN_DEPOLYMERIZATION	1	0.0180745	2	2	CARMIL2; DSTN
GO_POSITIVE_REGULATION_OF_PROTEIN_LOCALIZATION_TO_SYNAPSE	1	0.0180745	2	2	WNT5A
GO_POSITIVE_REGULATION_OF_RESPONSE_TO_EXTRACELLULAR_STIMULUS	1	0.0180745	2	2	CYP27B1
GO_POSITIVE_REGULATION_OF_RNA_POLYMERASE_II_TRANSCRIPTIONAL_PREINITIATION_COMPLEX_ASSEMBLY	1	0.0180745	2	2	ESR1; TP53
GO_POSITIVE_REGULATION_OF_TRANSCRIPTION_INITIATION_FROM_RNA_POLYMERASE_II_PROMOTER	1	0.0180745	2	2	ESR1; TP53
GO_POST_ANAL_TAIL_MORPHOGENESIS	1	0.0180745	2	2	WNT5A
GO_PROTEIN_INSERTION_INTO_MITOCHONDRIAL_INNER_MEMBRANE	1	0.0180745	2	2	COX18
GO_PROTEIN_INSERTION_INTO_MITOCHONDRIAL_MEMBRANE_INVOLVED_IN_APOPTOTIC_SIGNALING_PATHWAY	1	0.0180745	2	2	TP53; YWHAB
GO_PYRAMIDAL_NEURON_DIFFERENTIATION	1	0.0180745	2	2	FGFR2
GO_PYRIMIDINE_DEOXYRIBONUCLEOSIDE_MONOPHOSPHATE_BIOSYNTHETIC_PROCESS	1	0.0180745	2	2	DCTD
GO_PYRIMIDINE_NUCLEOTIDE_METABOLIC_PROCESS	1	0.0180745	2	2	DCTD
GO_RECEPTOR_DIFFUSION_TRAPPING	1	0.0180745	2	2	CACNG4; DLG4
GO_REGULATION_OF_BRANCHING_INVOLVED_IN_MAMMARY_GLAND_DUCT_MORPHOGENESIS	1	0.0180745	2	2	WNT5A
GO_REGULATION_OF_CALCIDIOL_1_MONOOXYGENASE_ACTIVITY	1	0.0180745	2	2	CYP27B1
GO_REGULATION_OF_CARDIAC_MUSCLE_TISSUE_REGENERATION	1	0.0180745	2	2	CDKN1A; CDKN1B
GO_REGULATION_OF_DENDRITIC_SPINE_MAINTENANCE	1	0.0180745	2	2	FYN; ZMYND8
GO_REGULATION_OF_HYDROGEN_PEROXIDE_BIOSYNTHETIC_PROCESS	1	0.0180745	2	2	FYN; STAT3
GO_REGULATION_OF_MICROTUBULE_DEPOLYMERIZATION	1	0.0180745	2	2	ARHGEF2; MAP1A
GO_REGULATION_OF_VITAMIN_D_BIOSYNTHETIC_PROCESS	1	0.0180745	2	2	CYP27B1
GO_REGULATION_OF_VITAMIN_D_RECEPTOR_SIGNALING_PATHWAY	1	0.0180745	2	2	CYP27B1
GO_REPLICATIVE_SENESCENCE	1	0.0180745	2	2	CDKN1A; TP53
GO_RESPONSE_TO_ACETYLCHOLINE	1	0.0180745	2	2	CHRM4; GNAQ
GO_SOMITE_ROSTRAL_CAUDAL_AXIS_SPECIFICATION	1	0.0180745	2	2	NRARP
GO_STRESS_INDUCED_PREMATURE_SENESCENCE	1	0.0180745	2	2	CDKN1A; TP53
GO_SYNAPTONEMAL_COMPLEX_ORGANIZATION	1	0.0180745	2	2	HSPA2; RAD21L1
GO_TOLL_LIKE_RECEPTOR_7_SIGNALING_PATHWAY	1	0.0180745	2	2	UNC93B1
GO_TOLL_LIKE_RECEPTOR_9_SIGNALING_PATHWAY	1	0.0180745	2	2	UNC93B1
GO_VITAMIN_BIOSYNTHETIC_PROCESS	1	0.0180745	2	2	CYP27B1
GO_VITAMIN_CATABOLIC_PROCESS	1	0.0180745	2	2	CYP27B1
GO_VITAMIN_D_BIOSYNTHETIC_PROCESS	1	0.0180745	2	2	CYP27B1
GO_WNT_SIGNALING_PATHWAY_INVOLVED_IN_HEART_DEVELOPMENT	1	0.0180745	2	2	WNT5A
REACTOME_ACTIVATION_OF_BAD_AND_TRANSLOCATION_TO_MITOCHONDRIA	1	0.0180745	2	2	AKT2; YWHAB
REACTOME_BETA_OXIDATION_OF_VERY_LONG_CHAIN_FATTY_ACIDS	1	0.0180745	2	2	DECR2
REACTOME_FGFR2C_LIGAND_BINDING_AND_ACTIVATION	1	0.0180745	2	2	FGFR2
REACTOME_FORMATION_OF_SENESCENCE_ASSOCIATED_HETEROCHROMATIN_FOCI_SAHF	1	0.0180745	2	2	CDKN1A; TP53
REACTOME_LGI_ADAM_INTERACTIONS	1	0.0180745	2	2	CACNG4; DLG4
REACTOME_PEROXISOMAL_LIPID_METABOLISM	1	0.0180745	2	2	DECR2
REACTOME_PROCESSING_OF_SMDT1	1	0.0180745	2	2	PARL
REACTOME_PROTEIN_REPAIR	1	0.0180745	2	2	MSRB2; TXN
REACTOME_REGULATION_OF_FOXO_TRANSCRIPTIONAL_ACTIVITY_BY_ACETYLATION	1	0.0180745	2	2	KAT2B; TXN
REACTOME_REGULATION_OF_GENE_EXPRESSION_BY_HYPOXIA_INDUCIBLE_FACTOR	1	0.0180745	2	2	HIF1A; VEGFA
REACTOME_REGULATION_OF_LOCALIZATION_OF_FOXO_TRANSCRIPTION_FACTORS	1	0.0180745	2	2	AKT2; YWHAB
REACTOME_REGULATION_OF_TP53_ACTIVITY_THROUGH_ASSOCIATION_WITH_CO_FACTORS	1	0.0180745	2	2	AKT2; TP53
REACTOME_SIGNALING_BY_FGFR2_IIIA_TM	1	0.0180745	2	2	FGFR2
REACTOME_TP53_REGULATES_TRANSCRIPTION_OF_GENES_INVOLVED_IN_CYTOCHROME_C_RELEASE	1	0.0180745	2	2	TP53; ZNF420
REACTOME_TRAFFICKING_AND_PROCESSING_OF_ENDOSOMAL_TLR	1	0.0180745	2	2	UNC93B1
REACTOME_TRANSPORT_OF_NUCLEOTIDE_SUGARS	1	0.0180745	2	2	SLC35B2
REACTOME_VITAMINS	1	0.0180745	2	2	CYP27B1
GO_APPENDAGE_MORPHOGENESIS	1	0.0185792	15	36	AFF3; FGFR2; FRAS1; FZD6; GLI2; GNA12; GNAS; TBX2; TFAP2B; WNT5A
GO_POSITIVE_REGULATION_OF_MITOTIC_CELL_CYCLE	1	0.0186954	18	45	CCNE1; CUL3; CUL4B; EGFR; EIF4EBP1; FOXA1; HES1; HSPA2; IGF2; MDM2; MEPCE; NUMA1; PKN2; PRKCA; SLF2; SMARCD3
GO_DOPAMINE_RECEPTOR_SIGNALING_PATHWAY	1	0.0186976	6	11	GNAS; GSK3A; KLF16
GO_FATTY_ACID_CATABOLIC_PROCESS	1	0.0186976	6	11	ABHD3; AKT2; CPT1A; DECR2; ETFB
GO_MONOCARBOXYLIC_ACID_CATABOLIC_PROCESS	1	0.0186976	6	11	ABHD3; AKT2; CPT1A; DECR2; ETFB
GO_SOMATIC_STEM_CELL_DIVISION	1	0.0186976	6	11	ARHGEF2; FGFR2; ZFP36L2
REACTOME_REGULATION_OF_RAS_BY_GAPS	1	0.0186976	6	11	CUL3; DAB2IP; PSMA6; PSMC1; PSMD3; SPRED2
GO_BIOLOGICAL_PHASE	1	0.0187376	3	4	CDH3; WNT5A
GO_CELLULAR_RESPONSE_TO_PROSTAGLANDIN_E_STIMULUS	1	0.0187376	3	4	AKAP8; SFRP1
GO_CELLULAR_RESPONSE_TO_PROSTAGLANDIN_STIMULUS	1	0.0187376	3	4	AKAP8; SFRP1
GO_COCHLEA_MORPHOGENESIS	1	0.0187376	3	4	GLI2; WNT5A
GO_CONVERGENT_EXTENSION_INVOLVED_IN_GASTRULATION	1	0.0187376	3	4	SFRP1; WNT5A
GO_CYTOPLASMIC_TRANSLATIONAL_INITIATION	1	0.0187376	3	4	EIF3B; EIF4EBP1; TICRR
GO_DIVALENT_INORGANIC_ANION_HOMEOSTASIS	1	0.0187376	3	4	SFRP4; TFAP2B; XPR1
GO_EATING_BEHAVIOR	1	0.0187376	3	4	CPT1A; STAT3; UCHL1
GO_FAT_PAD_DEVELOPMENT	1	0.0187376	3	4	ARID5B; TBL1XR1
GO_HAIR_FOLLICLE_MATURATION	1	0.0187376	3	4	CDH3; WNT5A
GO_LUNG_SACCULE_DEVELOPMENT	1	0.0187376	3	4	FOXA1
GO_MAGNESIUM_ION_HOMEOSTASIS	1	0.0187376	3	4	EGFR; TFAP2B; XK
GO_MIDBRAIN_DOPAMINERGIC_NEURON_DIFFERENTIATION	1	0.0187376	3	4	SFRP1; WNT5A
GO_MIDGUT_DEVELOPMENT	1	0.0187376	3	4	EGFR; WNT5A
GO_MONOVALENT_INORGANIC_ANION_HOMEOSTASIS	1	0.0187376	3	4	SFRP4; TFAP2B; XPR1
GO_MRNA_TRANSCRIPTION_BY_RNA_POLYMERASE_II	1	0.0187376	3	4	HIF1A; SOX18; STAT3
GO_NUCLEOTIDE_TRANSPORT	1	0.0187376	3	4	SLC25A41; SLC35B2
GO_OLFACTORY_BULB_INTERNEURON_DEVELOPMENT	1	0.0187376	3	4	ARX; WNT5A
GO_PLANAR_CELL_POLARITY_PATHWAY_INVOLVED_IN_AXIS_ELONGATION	1	0.0187376	3	4	SFRP1; WNT5A
GO_POSITIVE_REGULATION_OF_MITOCHONDRIAL_OUTER_MEMBRANE_PERMEABILIZATION_INVOLVED_IN_APOPTOTIC_SIGNALING_PATHWAY	1	0.0187376	3	4	GSK3A; TP53; YWHAB
GO_POSITIVE_REGULATION_OF_PROTEIN_KINASE_C_SIGNALING	1	0.0187376	3	4	VEGFA; WNT5A
GO_PROSTATE_GLAND_GROWTH	1	0.0187376	3	4	ESR1; FGFR2
GO_PROTEIN_TRANSMEMBRANE_TRANSPORT	1	0.0187376	3	4	AKT2; BCR; C2CD5
GO_PURINE_NUCLEOTIDE_TRANSPORT	1	0.0187376	3	4	SLC25A41; SLC35B2
GO_PYRIMIDINE_NUCLEOSIDE_BIOSYNTHETIC_PROCESS	1	0.0187376	3	4	CAD; DHODH; UCKL1
GO_REGULATION_OF_DNA_TEMPLATED_TRANSCRIPTION_INITIATION	1	0.0187376	3	4	ESR1; THRA; TP53
GO_REGULATION_OF_HORMONE_BIOSYNTHETIC_PROCESS	1	0.0187376	3	4	CYP27B1; HIF1A
GO_REGULATION_OF_HORMONE_METABOLIC_PROCESS	1	0.0187376	3	4	CYP27B1; HIF1A
GO_REGULATION_OF_MELANIN_BIOSYNTHETIC_PROCESS	1	0.0187376	3	4	CDH3; WNT5A
GO_REGULATION_OF_PROTEIN_KINASE_C_ACTIVITY	1	0.0187376	3	4	EGFR; WNT5A
GO_REGULATION_OF_PROTEIN_KINASE_C_SIGNALING	1	0.0187376	3	4	VEGFA; WNT5A
GO_REGULATION_OF_RNA_POLYMERASE_II_TRANSCRIPTIONAL_PREINITIATION_COMPLEX_ASSEMBLY	1	0.0187376	3	4	ESR1; THRA; TP53
GO_REGULATION_OF_SECONDARY_METABOLIC_PROCESS	1	0.0187376	3	4	CDH3; WNT5A
GO_REGULATION_OF_TRANSCRIPTION_INITIATION_FROM_RNA_POLYMERASE_II_PROMOTER	1	0.0187376	3	4	ESR1; THRA; TP53
GO_RNA_POLYMERASE_II_PREINITIATION_COMPLEX_ASSEMBLY	1	0.0187376	3	4	ESR1; THRA; TP53
GO_UMP_BIOSYNTHETIC_PROCESS	1	0.0187376	3	4	CAD; DHODH; UCKL1
REACTOME_FANCONI_ANEMIA_PATHWAY	1	0.0187376	3	4	FANCA
REACTOME_REGULATION_OF_GENE_EXPRESSION_IN_LATE_STAGE_BRANCHING_MORPHOGENESIS_PANCREATIC_BUD_PRECURSOR_CELLS	1	0.0187376	3	4	HES1; KAT2B; MAMLD1
REACTOME_RUNX3_REGULATES_NOTCH_SIGNALING	1	0.0187376	3	4	HES1; KAT2B; MAMLD1
GO_NEGATIVE_REGULATION_OF_PROTEIN_SERINE_THREONINE_KINASE_ACTIVITY	1	0.0187419	16	39	CAV1; CDK5RAP1; CDKN1A; CDKN1B; DAB2IP; DUSP16; DUSP8; KAT2B; MEN1; NR2F2; PDCD4; PTPN1; SFRP1; SPRED2; UCHL1
GO_POSITIVE_REGULATION_OF_CANONICAL_WNT_SIGNALING_PATHWAY	1	0.0187419	16	39	CAV1; CDH3; EGFR; FGFR2; JUP; NRARP; PRDM15; PSMA6; PSMC1; PSMD3; SFRP1; SFRP4; SRC; TBL1XR1
GO_RHYTHMIC_PROCESS	1	0.0187724	17	42	ADORA1; CLDN4; CPT1A; DYRK1A; EGFR; EGR3; ESR1; GNAQ; HNRNPL; KAT2B; MAGED1; NAGLU; NR1D2; NR2F6; SRC; TOP2A; TP53
GO_CELL_CYCLE_PROCESS	1	0.0189021	83	260	AKAP8; AKAP9; AKT2; ARHGEF2; AURKAIP1; BCL6; BIRC5; BIRC6; BMI1; BTG2; CCNE1; CDK6; CDKN1A; CDKN1B; CEP55; CTDSP1; CTDSP2; CUL3; CUL4B; CYP27B1; DAB2IP; EGFR; EIF2AK4; EIF4EBP1; ESCO1; FANCA; FBXL15; FBXO31; GADD45GIP1; HFM1; HSPA2; IGF2; KAT2B; LMNA; MAP10; MDM2; MEN1; MEPCE; MUC1; MYH9; NACC2; NTMT1; NUMA1; PAF1; PHC3; PKN2; POGZ; PPM1D; PRKCA; PSMA6; PSMC1; PSMD3; RAD21L1; RHOB; RINT1; SEPT9; …
GO_EPIDERMIS_DEVELOPMENT	1	0.018969	27	73	CDH3; CELSR1; CYP27B1; EGFR; ELF3; FGFR2; FOXN1; FZD6; HES1; JUP; KAZN; KRT8; KRTAP5-1; NUMA1; PKP3; PLOD1; RUNX1; SFRP4; SOX18; SULT2B1; WNT5A; ZFP36
GO_EMBRYONIC_PATTERN_SPECIFICATION	1	0.0195408	9	19	DISP1; FGFR2; NRARP; NRP2; WNT5A
GO_POSITIVE_REGULATION_OF_CELL_CYCLE_PHASE_TRANSITION	1	0.0195408	9	19	CCNE1; CUL3; CUL4B; EGFR; HSPA2; MDM2; MEPCE; PAF1; SMARCD3
GO_CANONICAL_WNT_SIGNALING_PATHWAY	1	0.0201734	25	67	CAV1; CDH3; CTNND1; CUL3; DAB2IP; EGFR; FGFR2; FZD6; GNAQ; GSK3A; JUP; NRARP; PRDM15; PSMA6; PSMC1; PSMD3; SFRP1; SFRP4; SOST; SRC; TBL1XR1; WNT5A
GO_CELL_CYCLE_PHASE_TRANSITION	1	0.0206972	38	109	AKAP8; AKAP9; BTG2; CCNE1; CDK6; CDKN1A; CDKN1B; CTDSP1; CTDSP2; CUL3; CUL4B; EGFR; EIF4EBP1; FBXL15; FBXO31; HSPA2; MDM2; MEN1; MEPCE; MUC1; NACC2; PAF1; PPM1D; PSMA6; PSMC1; PSMD3; RINT1; SKP1; SMARCD3; TICRR; TP53; ZFP36L2
GO_MORPHOGENESIS_OF_A_BRANCHING_STRUCTURE	1	0.0207693	24	64	CELSR1; ESR1; FEM1B; FGFR2; FOXA1; FOXD1; GLI2; GNA13; GZF1; HOXB7; MAGED1; NRARP; PAK1; SFRP1; SRC; VEGFA; WNT5A
GO_EAR_MORPHOGENESIS	1	0.0213364	10	22	BCR; CELSR1; FGFR2; FZD6; GLI2; LRIG1; NAGLU; WNT5A
GO_POSITIVE_REGULATION_OF_FIBROBLAST_PROLIFERATION	1	0.0213364	10	22	BMI1; CD74; CDK6; CDKN1A; EGFR; ESR1; FBRS; WNT5A; ZMIZ1
GO_SEGMENTATION	1	0.0213364	10	22	BMI1; CDX2; HES1; NRARP; NRP2; SFRP1; WNT5A
GO_EPITHELIAL_CELL_DIFFERENTIATION	1	0.0219719	55	166	AKT2; ARX; CAV1; CDH3; CDK6; CDKN1A; CDKN1B; CDX2; CPT1A; CYP27B1; DHRS9; DLX3; ELF3; ESR1; ETV2; FAM20C; FEM1B; FGFR2; FOXA1; FOXN1; GSK3A; HES1; HIF1A; JUP; KAZN; KRT8; KRTAP5-1; MEN1; NR2F2; NUMA1; PKP3; RARA; RUNX1; S1PR3; SFRP4; SOX18; SPDEF; SULT2B1; THRA; TNFRSF1A; VEGFA; VEZF1; WNT5A; ZFP36
GO_REGULATION_OF_STEM_CELL_DIFFERENTIATION	1	0.0226252	11	25	CDK6; HES1; PSMA6; PSMC1; PSMD3; RUNX1; STAT3; ZFP36L2
GO_ORGANONITROGEN_COMPOUND_BIOSYNTHETIC_PROCESS	1	0.022821	83	262	ABAT; ABCA7; ABHD3; ACHE; AKT2; ANG; ATXN2; AURKAIP1; BTG2; CAD; CANT1; CDK5RAP1; CHPT1; CPEB2; CPEB4; CPOX; DCTD; DHODH; DPAGT1; EEF1G; EGFR; EIF2AK4; EIF3B; EIF4A1; EIF4EBP1; GADD45GIP1; GMPR; GUCY2D; GXYLT1; HIF1A; HNRNPL; ITM2C; LARP4B; MAN1B1; MIR365B; MKNK2; MOCS3; MRPL4; MRPS22; MRPS25; MUC1; NADK; NECAB3; PABPC1; PAIP1; PAPSS2; PARP10; PGAP2; PLOD1; POMK; POMT1; PPA2; PRELP; PTDSS2; PUM2;…
GO_FEEDING_BEHAVIOR	1	0.0231509	7	14	CPT1A; EIF2AK4; FOS; FYN; NPY1R; STAT3; UCHL1
GO_KERATINIZATION	1	0.0231509	7	14	CDH3; JUP; KAZN; KRT8; KRTAP5-1; PKP3
GO_MITOCHONDRIAL_MEMBRANE_ORGANIZATION	1	0.0231509	7	14	COX18; GSK3A; HSPA4; STAT3; TP53; YWHAB
GO_OUTFLOW_TRACT_SEPTUM_MORPHOGENESIS	1	0.0231509	7	14	FGFR2; NRP2; RARA; TBX2
GO_REGULATION_OF_VASCULAR_SMOOTH_MUSCLE_CELL_PROLIFERATION	1	0.0231509	7	14	CDKN1A; CDKN1B; MDM2; PAK1; PDCD4; TPM1
GO_SENSORY_PERCEPTION_OF_PAIN	1	0.0231509	7	14	ADORA1; FYN; NPY1R; NR2F6; POMK; SCN1A; UCHL1
REACTOME_NOTCH1_INTRACELLULAR_DOMAIN_REGULATES_TRANSCRIPTION	1	0.0231509	7	14	HDAC5; HES1; HIF1A; KAT2B; MAMLD1; SKP1; TBL1XR1
GO_NEGATIVE_REGULATION_OF_EPITHELIAL_CELL_PROLIFERATION	1	0.0235053	12	28	CAV1; CDK6; CDKN1B; DAB2IP; FGFR2; MAGED1; MEN1; NR2F2; SFRP1; WNT5A
GO_NEGATIVE_REGULATION_OF_CATABOLIC_PROCESS	1	0.0241385	17	43	ADORA1; AGAP2; DAB2IP; DDIT4; DFFA; EGFR; FYN; GSK3A; MAP1A; PABPC1; PAIP1; PKP3; STAT3; SYNCRIP; USP7; WDR6; ZFP36
REACTOME_INTERLEUKIN_4_AND_INTERLEUKIN_13_SIGNALING	1	0.0243494	14	34	BCL6; BIRC5; CDKN1A; FOS; FSCN1; HIF1A; JAK1; JUNB; MUC1; PIM1; STAT3; TP53; VEGFA
GO_NEURON_MIGRATION	1	0.0243511	16	40	ARHGEF2; ARX; CELSR1; CELSR3; DAB2IP; DDIT4; DISC1; FBXO31; FYN; NAV1; NR2F2; NRP2; POMK; STAT3; VEGFA
GO_CELLULAR_RESPONSE_TO_VITAMIN	1	0.0250265	5	9	CYP27B1; MDM2; PIM1; SFRP1
GO_CYTOPLASMIC_TRANSLATION	1	0.0250265	5	9	CPEB2; CPEB4; EIF3B; EIF4EBP1; TICRR
GO_ENDOTHELIAL_CELL_DEVELOPMENT	1	0.0250265	5	9	S1PR3; SOX18; TNFRSF1A; VEZF1
GO_GLOSSOPHARYNGEAL_NERVE_DEVELOPMENT	1	0.0250265	5	9	HOXB3; NAV2
GO_INTRINSIC_APOPTOTIC_SIGNALING_PATHWAY_IN_RESPONSE_TO_DNA_DAMAGE_BY_P53_CLASS_MEDIATOR	1	0.0250265	5	9	CD74; DDIT4; MUC1; NUPR1; TP53
GO_NEGATIVE_CHEMOTAXIS	1	0.0250265	5	9	NRP2; SEMA4B; WNT5A
GO_NEURAL_TUBE_PATTERNING	1	0.0250265	5	9	FOXA1; GLI2; HES1
GO_POSITIVE_REGULATION_OF_EPIDERMAL_CELL_DIFFERENTIATION	1	0.0250265	5	9	CYP27B1; NUMA1; SFRP4; SULT2B1
GO_REGULATION_OF_FIBROBLAST_GROWTH_FACTOR_RECEPTOR_SIGNALING_PATHWAY	1	0.0250265	5	9	FAM20C; FGFR2; WNT5A
GO_REGULATION_OF_HAIR_FOLLICLE_DEVELOPMENT	1	0.0250265	5	9	CDH3; FOXN1; NUMA1; WNT5A
GO_THYMOCYTE_APOPTOTIC_PROCESS	1	0.0250265	5	9	DFFA; HIF1A; TP53; WNT5A
GO_WNT_SIGNALING_PATHWAY_CALCIUM_MODULATING_PATHWAY	1	0.0250265	5	9	FZD6; TNRC6C; WNT5A
REACTOME_ASYMMETRIC_LOCALIZATION_OF_PCP_PROTEINS	1	0.0250265	5	9	PSMA6; PSMC1; PSMD3; WNT5A
REACTOME_METABOLISM_OF_POLYAMINES	1	0.0250265	5	9	PSMA6; PSMC1; PSMD3; SMOX; SRM
REACTOME_PHASE_II_CONJUGATION_OF_COMPOUNDS	1	0.0250265	5	9	ACSM1; PAPSS2; SLC35B2; SULT2B1
REACTOME_RHO_GTPASES_ACTIVATE_CIT	1	0.0250265	5	9	CDKN1B; DLG4; MYH9; RHOB
GO_POSITIVE_REGULATION_OF_CELL_CYCLE_PROCESS	1	0.0252832	24	65	BTG2; CCNE1; CDKN1A; CDKN1B; CUL3; CUL4B; DAB2IP; EGFR; HSPA2; IGF2; MAP10; MDM2; MEPCE; MUC1; NUMA1; PAF1; PKN2; SLF2; SMARCD3; SVIL; TP53; WNT5A
GO_REGULATION_OF_CELL_CYCLE_PHASE_TRANSITION	1	0.0254332	33	94	AKAP9; BTG2; CCNE1; CDK6; CDKN1A; CDKN1B; CTDSP1; CTDSP2; CUL3; CUL4B; EGFR; FBXO31; HSPA2; MDM2; MEN1; MEPCE; MUC1; NACC2; PAF1; PSMA6; PSMC1; PSMD3; RINT1; SKP1; SMARCD3; TICRR; TP53; ZFP36L2
GO_NEGATIVE_REGULATION_OF_BIOSYNTHETIC_PROCESS	1	0.0267307	114	372	ABCA7; ANG; ARID5B; ARX; BCL6; BIRC5; BMI1; BTG2; CAV1; CCNE1; CDAN1; CDK6; CDKN1B; CDX2; CPEB2; CPEB4; CUL3; CYP27B1; DAB2IP; DLX4; DNAJB6; EIF2AK4; EIF4EBP1; ELF3; ESR1; FGFR2; FHL2; FOXA1; FOXD1; FYN; GLI2; GLIS2; GSK3A; GZF1; HDAC5; HES1; HOXB3; IGF2; ITM2C; JUNB; JUND; KLF16; MAGED1; MDM2; MEN1; MEPCE; MIR365B; MUC1; NACC2; NOTCH3; NR1D2; NR2F2; NR2F6; NR3C1; NRARP; PAF1; PAXBP1; PDCD4; PPM1…
GO_INNER_EAR_MORPHOGENESIS	1	0.0286867	9	20	BCR; CELSR1; FGFR2; FZD6; GLI2; LRIG1; WNT5A
REACTOME_FOXO_MEDIATED_TRANSCRIPTION	1	0.0286867	9	20	AKT2; BCL6; CAV1; CDKN1A; CDKN1B; KAT2B; NR3C1; TXN; YWHAB
GO_APPENDAGE_DEVELOPMENT	1	0.0292507	19	50	AFF3; FGFR2; FOXN1; FRAS1; FZD6; GLI2; GNA12; GNAS; KAT2B; NR2F2; RARA; TBX2; TFAP2B; WNT5A
GO_EPIDERMAL_CELL_DIFFERENTIATION	1	0.0292507	19	50	CDH3; CYP27B1; FOXN1; HES1; JUP; KAZN; KRT8; KRTAP5-1; NUMA1; PKP3; RUNX1; SFRP4; SULT2B1; WNT5A; ZFP36
REACTOME_DISEASES_OF_SIGNAL_TRANSDUCTION	1	0.0302218	36	105	ACTB; AKAP9; AKT1S1; AKT2; BCR; CDKN1A; CDKN1B; DAB2IP; EGFR; ESR1; FGFR2; FYN; FZD6; GSK3A; HDAC5; HES1; KAT2B; KIAA1549; LMNA; MAMLD1; MDM2; MYO18A; PPP2R5A; PSMA6; PSMC1; PSMD3; QKI; SKP1; SND1; SPRED2; SRC; STAT3; TBL1XR1; YWHAB
GO_REGULATION_OF_PHOSPHOLIPASE_ACTIVITY	1	0.0302304	10	23	ANG; EGFR; ESR1; FGFR2; GNA13; GNAQ; LRP1
GO_RESPONSE_TO_MOLECULE_OF_BACTERIAL_ORIGIN	1	0.030515	24	66	AKAP8; BCR; CYP27B1; DAB2IP; FGFR2; FOS; HDAC5; JUNB; JUND; PAF1; PDCD4; PRKCA; RARA; SPON2; SRC; WNT5A; ZFP36
GO_CARDIAC_CHAMBER_MORPHOGENESIS	1	0.0305884	17	44	CPE; FGFR2; FHL2; GSK3A; HES1; HIF1A; MDM2; NRP2; RARA; SMARCD3; TBX2; TPM1; WNT5A
GO_INTRINSIC_APOPTOTIC_SIGNALING_PATHWAY_BY_P53_CLASS_MEDIATOR	1	0.0314511	6	12	CD74; DDIT4; MDM2; MUC1; NUPR1; TP53
GO_MESONEPHRIC_TUBULE_MORPHOGENESIS	1	0.0314511	6	12	FOXD1; GZF1; HES1; HOXB7; MAGED1; VEGFA
GO_NEURAL_CREST_CELL_MIGRATION	1	0.0314511	6	12	HIF1A; NRP2; NRTN; SEMA4B
GO_POSITIVE_REGULATION_OF_CYTOKINE_PRODUCTION_INVOLVED_IN_IMMUNE_RESPONSE	1	0.0314511	6	12	CD74; HLA-F; SASH3; SPON2; WNT5A
GO_RESPONSE_TO_IRON_ION	1	0.0314511	6	12	ABAT; HIF1A; MAP1LC3A; MDM2; TFF1; TFR2
REACTOME_KERATINIZATION	1	0.0314511	6	12	JUP; KAZN; KRT8; KRTAP5-1; PKP3
REACTOME_TNFR2_NON_CANONICAL_NF_KB_PATHWAY	1	0.0314511	6	12	PSMA6; PSMC1; PSMD3; SKP1; TNFRSF1A; TNFSF13
REACTOME_TRANSLOCATION_OF_SLC2A4_GLUT4_TO_THE_PLASMA_MEMBRANE	1	0.0314511	6	12	ACTB; AKT2; C2CD5; MYH9; TUBA1B; YWHAB
HALLMARK_INTERFERON_GAMMA_RESPONSE	1	0.0317282	12	29	ARID5B; CD74; CDKN1A; HIF1A; IFI44; OGFR; PIM1; PTPN1; STAT3; TNFAIP2
GO_SMOOTH_MUSCLE_CELL_PROLIFERATION	1	0.0317282	12	29	ANG; CDKN1A; CDKN1B; EGFR; FGFR2; MDM2; NOTCH3; PAK1; PDCD4; TPM1
GO_SMOOTHENED_SIGNALING_PATHWAY	1	0.0319159	13	32	DISP1; FBXL17; FGFR2; FOXA1; GLI2; GLIS2; HES1; SFRP1
GO_PROTEIN_LOCALIZATION_TO_MEMBRANE	1	0.0323069	31	89	ACTB; ADORA1; AKT2; C2CD5; CACNG4; CAV1; COX18; CPE; DENND4C; DLG4; EGFR; EMP2; FLOT1; FYN; HSPA4; JUP; LRP1; PAK1; PICALM; PKP3; PLEKHF1; PPP2R5A; REEP1; RPL22; SSR1; TNFRSF1A; TP53; WRB; YWHAB; ZMYND8
GO_HEART_MORPHOGENESIS	1	0.0324449	27	76	CPE; DLC1; ELN; FGFR2; FHL2; GSK3A; HES1; HIF1A; MDM2; NPY1R; NRP2; OLFM1; PDCD4; PIM1; RARA; SMARCD3; SOX18; TBX2; TPM1; VEGFA; WNT5A; ZMIZ1
GO_BLOOD_VESSEL_MORPHOGENESIS	1	0.0330996	51	156	ANG; CAV1; DAB2IP; EGFL7; EGR3; EMP2; ETV2; FGFR2; FOXN1; GNA13; HDAC5; HES1; HIF1A; HOXB3; JAK1; JUNB; JUP; LRP1; MYH9; NOTCH3; NR2F2; NRARP; NRP2; PAK4; PRKCA; RHOB; RUNX1; SFRP1; SOX18; STAT3; TBX2; TFAP2B; TNFAIP2; VEGFA; VEZF1; WNT5A; ZMIZ1
GO_CELLULAR_RESPONSE_TO_GAMMA_RADIATION	1	0.0334749	4	7	MDM2; TP53; TSPYL5
GO_CELLULAR_RESPONSE_TO_VITAMIN_D	1	0.0334749	4	7	CYP27B1; PIM1; SFRP1
GO_EMBRYONIC_AXIS_SPECIFICATION	1	0.0334749	4	7	NRARP; WNT5A
GO_ESTABLISHMENT_OF_EPITHELIAL_CELL_POLARITY	1	0.0334749	4	7	HES1; MYO18A; WNT5A
GO_IRON_ION_HOMEOSTASIS	1	0.0334749	4	7	HIF1A; PICALM; SKP1; TFR2
GO_MACROPHAGE_CYTOKINE_PRODUCTION	1	0.0334749	4	7	CD74; SPON2; WNT5A
GO_MALE_MEIOTIC_NUCLEAR_DIVISION	1	0.0334749	4	7	FANCA; HSPA2
GO_NEGATIVE_REGULATION_OF_ANION_TRANSPORT	1	0.0334749	4	7	ABAT; ADORA1; AKT2; SFRP4
GO_NEGATIVE_REGULATION_OF_MORPHOGENESIS_OF_AN_EPITHELIUM	1	0.0334749	4	7	TBX2; WNT5A
GO_NEGATIVE_REGULATION_OF_SIGNAL_TRANSDUCTION_BY_P53_CLASS_MEDIATOR	1	0.0334749	4	7	CD74; DYRK1A; MDM2; MUC1
GO_NEGATIVE_REGULATION_OF_TOR_SIGNALING	1	0.0334749	4	7	AKT1S1; DDIT4; GSK3A; HIF1A
GO_NEURON_FATE_SPECIFICATION	1	0.0334749	4	7	FOXA1; GLI2
GO_POSITIVE_REGULATION_OF_CAMP_MEDIATED_SIGNALING	1	0.0334749	4	7	GPR62; GSK3A; PRKCA
GO_POSITIVE_REGULATION_OF_CYTOKINESIS	1	0.0334749	4	7	CUL3; MAP10; PKN2; SVIL
GO_POSITIVE_REGULATION_OF_HAIR_CYCLE	1	0.0334749	4	7	FOXN1; NUMA1; WNT5A
GO_POSITIVE_REGULATION_OF_MACROPHAGE_CYTOKINE_PRODUCTION	1	0.0334749	4	7	CD74; SPON2; WNT5A
GO_PROTEIN_KINASE_C_SIGNALING	1	0.0334749	4	7	FLOT1; VEGFA; WNT5A
GO_REGULATION_OF_GLYCOGEN_METABOLIC_PROCESS	1	0.0334749	4	7	AKT2; GSK3A; IGF2; PPP1R3F
GO_REGULATION_OF_MACROPHAGE_ACTIVATION	1	0.0334749	4	7	CD74; MYO18A; WNT5A
GO_REGULATION_OF_T_CELL_APOPTOTIC_PROCESS	1	0.0334749	4	7	HIF1A; TP53; WNT5A
GO_TYPE_B_PANCREATIC_CELL_DEVELOPMENT	1	0.0334749	4	7	CDK6; GSK3A; WNT5A
GO_VASCULAR_SMOOTH_MUSCLE_CELL_DIFFERENTIATION	1	0.0334749	4	7	HES1; PDCD4; VEGFA
REACTOME_ACTIVATION_OF_THE_MRNA_UPON_BINDING_OF_THE_CAP_BINDING_COMPLEX_AND_EIFS_AND_SUBSEQUENT_BINDING_TO_43S	1	0.0334749	4	7	EIF3B; EIF4A1; EIF4EBP1; PABPC1
REACTOME_INTERLEUKIN_10_SIGNALING	1	0.0334749	4	7	JAK1; STAT3; TNFRSF1A
REACTOME_THROMBOXANE_SIGNALLING_THROUGH_TP_RECEPTOR	1	0.0334749	4	7	GNA13; GNAQ
REACTOME_TP53_REGULATES_TRANSCRIPTION_OF_GENES_INVOLVED_IN_G1_CELL_CYCLE_ARREST	1	0.0334749	4	7	CCNE1; CDKN1A; CDKN1B; TP53
GO_COLUMNAR_CUBOIDAL_EPITHELIAL_CELL_DIFFERENTIATION	1	0.0338599	21	57	CDK6; CDKN1A; CDX2; DLX3; FAM20C; FGFR2; FOXA1; GSK3A; HES1; HIF1A; MEN1; RARA; SPDEF; WNT5A
GO_EPITHELIAL_CELL_DEVELOPMENT	1	0.0338599	21	57	CDK6; CDKN1A; ESR1; FEM1B; FOXA1; GSK3A; HIF1A; RARA; S1PR3; SOX18; SPDEF; TNFRSF1A; VEZF1; WNT5A
GO_REGIONALIZATION	1	0.0351624	29	83	BMI1; BTG2; CDX2; CELSR1; DISP1; FBXL15; FGFR2; FOXA1; FOXD1; GLI2; HES1; HOXB3; HOXB7; NR2F2; NRARP; NRP2; SFRP1; SMARCD3; WNT5A
GO_RNA_METABOLIC_PROCESS	1	0.0352799	47	143	ANG; ATXN2; AURKAIP1; CDK5RAP1; CLK3; CTU1; DAZAP1; DYRK1A; EGFR; ESR1; HIF1A; HNRNPF; HNRNPH1; HNRNPL; HNRNPM; INTS6; LUC7L; MEPCE; MOCS3; MTPAP; NCBP3; PABPC1; PAF1; PPA2; PQBP1; PRPF4B; PUM2; QKI; RBM39; RNASEH2A; RNU5B-1; RPP25; SEPHS1; SF3A2; SF3B1; SND1; SNORA70B; SNORD65; SOX18; STAT3; SYNCRIP; THOC2; TP53; TRMO; U2AF2
GO_POSITIVE_REGULATION_OF_RNA_BIOSYNTHETIC_PROCESS	1	0.035359	101	330	ARHGEF2; ARID3C; ARID5B; ASCL5; CAMKK2; CCNE1; CD74; CDX2; DAB2IP; DLX3; EGFR; EGR3; ELF3; ESR1; ESRRG; ETV2; FGFR2; FHL2; FOS; FOXA1; FOXD1; FOXN1; GABPB2; GLI2; GLIS2; HDAC5; HES1; HIF1A; HOXB3; HOXB7; IGF2; IRF2BP2; JUNB; JUND; JUP; KAT2B; KLF1; MAGED1; MAZ; MEN1; MSANTD1; MUC1; NOTCH3; NR1D2; NR2F2; NR3C1; NUPR1; PAF1; PAXBP1; PICALM; PQBP1; PRDM15; RARA; RBPJL; RUNX1; SERTAD1; SETD7; SFRP1; …
GO_EMBRYONIC_DIGIT_MORPHOGENESIS	1	0.0358311	7	15	FZD6; GLI2; GNA12; TBX2; WNT5A
GO_KIDNEY_MORPHOGENESIS	1	0.0358311	7	15	FOXD1; FRAS1; GZF1; HES1; HOXB7; MAGED1; VEGFA
GO_REGULATION_OF_DNA_TEMPLATED_TRANSCRIPTION_IN_RESPONSE_TO_STRESS	1	0.0358311	7	15	HIF1A; MUC1; PSMA6; PSMC1; PSMD3; TP53; VEGFA
HALLMARK_PEROXISOME	1	0.0387084	8	18	ABCB9; DLG4; HSD3B7; PABPC1; SLC35B2; SULT2B1; TOP2A
GO_AMYLOID_PRECURSOR_PROTEIN_METABOLIC_PROCESS	1	0.0387084	8	18	ABCA7; ACHE; DYRK1A; GSK3A; ITM2C; NECAB3; PICALM
GO_ARTERY_MORPHOGENESIS	1	0.0387084	8	18	HES1; LRP1; NOTCH3; TBX2; TFAP2B; VEGFA; ZMIZ1
GO_CELLULAR_RESPONSE_TO_BIOTIC_STIMULUS	1	0.0392198	16	42	AKAP8; BCR; DAB2IP; HDAC5; PAF1; PDCD4; PRKCA; RARA; SPON2; SRC; TP53; WNT5A; ZFP36
GO_REGULATION_OF_CELL_CYCLE_PROCESS	1	0.0395121	52	161	AKAP9; AKT2; AURKAIP1; BCL6; BIRC6; BMI1; BTG2; CCNE1; CDK6; CDKN1A; CDKN1B; CTDSP1; CTDSP2; CUL3; CUL4B; DAB2IP; EGFR; FBXO31; HSPA2; IGF2; KAT2B; MAP10; MDM2; MEN1; MEPCE; MUC1; NACC2; NUMA1; PAF1; PHC3; PKN2; PSMA6; PSMC1; PSMD3; RINT1; SFRP1; SKP1; SLF2; SMARCD3; SND1; STAG1; SVIL; TICRR; TP53; WNT5A; ZFP36L2
GO_CELL_SURFACE_RECEPTOR_SIGNALING_PATHWAY_INVOLVED_IN_CELL_CELL_SIGNALING	1	0.0396268	47	144	ABAT; ADORA1; CAV1; CCNE1; CDH3; CELSR1; CELSR3; CPE; CTNND1; CUL3; DAB2IP; DISC1; DLG4; EGFR; ESR1; ETV2; FGFR2; FZD6; GLI2; GNAQ; GSK3A; JUP; LRP1; NRARP; PAF1; PPP1R9A; PRDM15; PSMA6; PSMC1; PSMD3; RUNX1; SFRP1; SFRP4; SHANK2; SKP1; SOST; SRC; TBL1XR1; TNRC6C; TSKU; WNT5A; ZMYND8
GO_NEGATIVE_REGULATION_OF_TRANSFERASE_ACTIVITY	1	0.0399017	26	74	AKT1S1; CAV1; CDK5RAP1; CDKN1A; CDKN1B; DAB2IP; DUSP16; DUSP8; GNAQ; GSK3A; KAT2B; MEN1; MIDN; MLLT1; NR2F2; PDCD4; PPP2R5A; PTPN1; SFRP1; SPRED2; SRC; TP53; UCHL1; ZFP36; ZFYVE28
GO_TUBE_DEVELOPMENT	1	0.0401464	78	251	ANG; CAV1; CDKN1A; CDX2; CELSR1; DAB2IP; DLC1; EGFL7; EGFR; EGR3; EIF4EBP1; EMP2; ESR1; ETV2; FGFR2; FOXA1; FOXD1; FOXN1; FZD6; GLI2; GNA13; GZF1; HDAC5; HES1; HIF1A; HOXB3; HOXB7; JAK1; JUNB; JUP; LRP1; MAGED1; MYH9; NOTCH3; NR2F2; NRARP; NRP2; PAK1; PAK4; PRKCA; RAD21L1; RARA; RHOB; RUNX1; SFRP1; SOX18; SPDEF; SRC; STAT3; TBX2; TFAP2B; THRA; TNFAIP2; TNS3; VEGFA; VEZF1; WNT5A; ZMIZ1
GO_NEGATIVE_REGULATION_OF_CATALYTIC_ACTIVITY	1	0.0404114	44	134	AKAP9; AKT1S1; ANOS1; BIRC5; BIRC6; CAV1; CDK5RAP1; CDKN1A; CDKN1B; CPEB2; CYP27B1; DAB2IP; DFFA; DNAJB6; DUSP16; DUSP8; GNAQ; GSK3A; KAT2B; LMTK3; MDM2; MEN1; MIDN; MLLT1; NR2F2; PDCD4; PI15; PICALM; PPP1R12C; PPP1R17; PPP1R1A; PPP2R5A; PTPN1; SFRP1; SPRED2; SRC; TFAP2B; TP53; UCHL1; VEGFA; ZFP36; ZFYVE28
REACTOME_OXIDATIVE_STRESS_INDUCED_SENESCENCE	1	0.0404917	9	21	BMI1; CDK6; FOS; MDM2; PHC3; TNRC6C; TP53; TXN
GO_POSITIVE_REGULATION_OF_CELL_POPULATION_PROLIFERATION	1	0.040741	65	206	AKT2; ANG; BCL6; BIRC5; BIRC6; BMI1; CCNE1; CD74; CDH3; CDK6; CDKN1A; CDKN1B; CDX2; CIAO1; CRIP2; CUL3; DISC1; EGFL7; EGFR; EGR3; EMP2; ESR1; FBRS; FGFR2; GLI2; HES1; HIF1A; IGF2; MALAT1; MAZ; MDM2; NACC2; NOTCH3; NRARP; NRP2; PAK1; PAXBP1; PIM1; PRKCA; RARA; ROGDI; S1PR3; SASH3; SERTAD1; SFRP1; SMARCD3; SSR1; STAT3; TBX2; TFAP2B; TNFSF13; TNS3; TSPYL5; VEGFA; WNT5A; ZMIZ1; ZNF580
GO_CARDIOVASCULAR_SYSTEM_DEVELOPMENT	1	0.0408023	56	175	ANG; CAV1; CDX2; DAB2IP; DLX3; EGFL7; EGR3; EMP2; ETV2; FGFR2; FOXN1; GNA13; HDAC5; HES1; HIF1A; HOXB3; JAK1; JUNB; JUP; LRP1; MDM2; MYH9; NOTCH3; NR2F2; NRARP; NRP2; PAK4; PDCD4; PRKCA; RHOB; RUNX1; SFRP1; SOX18; STAT3; TBX2; TFAP2B; TNFAIP2; VEGFA; VEZF1; WNT5A; ZMIZ1
GO_PROTEIN_POLYUBIQUITINATION	1	0.0408844	14	36	CUL3; FBXL15; FBXL17; FBXO17; FBXO31; PARP10; PSMA6; PSMC1; PSMD3; SKP1; TRIM36; TRIM56; ZNRF2
GO_POST_EMBRYONIC_DEVELOPMENT	1	0.0414759	10	24	ARID5B; FGFR2; GNAS; INPPL1; MORC3; VEGFA
GO_REGULATION_OF_LIPASE_ACTIVITY	1	0.0414759	10	24	ANG; EGFR; ESR1; FGFR2; GNA13; GNAQ; LRP1
GO_ANION_TRANSMEMBRANE_TRANSPORT	1	0.0418363	12	30	AKT2; CLDN4; CPT1A; GABRA5; LRRC8A; SLC13A3; SLC25A14; SLC25A38; SLC35B2; XPR1
GO_ANIMAL_ORGAN_MORPHOGENESIS	1	0.0418532	77	248	ABLIM1; ARID5B; BCR; CAV1; CDX2; CELSR1; CELSR3; CPE; CUL3; DLC1; DLX3; EGFR; ELF3; ELN; ESR1; FAM20C; FEM1B; FGFR2; FHL2; FOXA1; FOXD1; FOXN1; FRAS1; FZD6; GLI2; GNAS; GSK3A; GZF1; HES1; HIF1A; HOXB3; HOXB7; IGF2; INPPL1; LRIG1; MAGED1; MDM2; NAGLU; NPY1R; NRP2; OLFM1; PDCD4; PIM1; PSMA6; PSMC1; PSMD3; RARA; ROGDI; SFRP1; SFRP4; SHANK2; SIX6; SMARCD3; SOX18; SRC; STAT3; TBX2; TFAP2B; THRA; TPM1;…
HALLMARK_E2F_TARGETS	1	0.0418729	11	27	BIRC5; CCNE1; CDKN1A; CDKN1B; ING3; PPM1D; RNASEH2A; STAG1; SYNCRIP; TOP2A; TP53
GO_CARDIAC_SEPTUM_MORPHOGENESIS	1	0.0418729	11	27	FGFR2; HES1; MDM2; NRP2; RARA; TBX2; WNT5A
GO_REGULATION_OF_STRESS_ACTIVATED_PROTEIN_KINASE_SIGNALING_CASCADE	1	0.0418729	11	27	DAB2IP; EGFR; MEN1; PAK1; PDCD4; PTPN1; SFRP1; VEGFA; WNT5A
GO_POSITIVE_REGULATION_OF_TRANSCRIPTION_BY_RNA_POLYMERASE_II	1	0.0419122	79	255	ARHGEF2; ARID3C; ASCL5; DAB2IP; DLX3; EGFR; EGR3; ELF3; ESR1; ESRRG; ETV2; FGFR2; FOS; FOXA1; FOXD1; FOXN1; GABPB2; GLI2; GLIS2; HDAC5; HES1; HIF1A; HOXB3; HOXB7; IGF2; IRF2BP2; JUNB; JUND; JUP; KAT2B; KLF1; MEN1; MUC1; NOTCH3; NR1D2; NR3C1; PAF1; PAXBP1; PRDM15; RARA; RBPJL; RUNX1; SERTAD1; SIX6; SOX18; SPDEF; SSBP4; STAG1; STAT3; TBL1XR1; TFAP2B; TFE3; TFR2; THRA; TNFRSF1A; TOP2A; TP53; VEGFA; …
GO_PEPTIDE_BIOSYNTHETIC_PROCESS	1	0.042978	40	121	AKT2; ANG; ATXN2; AURKAIP1; BTG2; CDK5RAP1; CPEB2; CPEB4; EEF1G; EGFR; EIF2AK4; EIF3B; EIF4A1; EIF4EBP1; GADD45GIP1; HNRNPL; LARP4B; MIR365B; MKNK2; MRPL4; MRPS22; MRPS25; PABPC1; PAIP1; PPA2; PUM2; QKI; RARA; RPL22; STAT3; SYNCRIP; TICRR; TNRC6C; ZFP36; ZFP36L2
GO_AORTA_MORPHOGENESIS	1	0.0429959	5	10	HES1; LRP1; TBX2; TFAP2B
GO_CELLULAR_RESPONSE_TO_FATTY_ACID	1	0.0429959	5	10	AKAP8; CPT1A; SFRP1; SRC
GO_CORNIFICATION	1	0.0429959	5	10	JUP; KAZN; KRT8; PKP3
GO_GLYCOGEN_BIOSYNTHETIC_PROCESS	1	0.0429959	5	10	AKT2; GBE1; GSK3A; IGF2; PPP1R3F
GO_HINDLIMB_MORPHOGENESIS	1	0.0429959	5	10	AFF3; GNAS; TFAP2B
GO_MEMBRANE_BIOGENESIS	1	0.0429959	5	10	CAV1; DMKN; EMP2; FLOT1; PACSIN2
GO_MEMBRANE_RAFT_ORGANIZATION	1	0.0429959	5	10	ABCA7; CAV1; EMP2; FLOT1; PACSIN2
GO_POSITIVE_REGULATION_OF_CHEMOKINE_PRODUCTION	1	0.0429959	5	10	CD74; HIF1A; LRP1; WNT5A
GO_REGULATION_OF_RECEPTOR_INTERNALIZATION	1	0.0429959	5	10	ATXN2; DLG4; FLOT1; SFRP4; VEGFA
GO_TOLL_LIKE_RECEPTOR_3_SIGNALING_PATHWAY	1	0.0429959	5	10	CAV1; FLOT1; UNC93B1; WDFY1
REACTOME_FORMATION_OF_THE_CORNIFIED_ENVELOPE	1	0.0429959	5	10	JUP; KAZN; KRT8; PKP3
REACTOME_SIGNAL_AMPLIFICATION	1	0.0429959	5	10	GNA13; GNAQ; SRC
REACTOME_STABILIZATION_OF_P53	1	0.0429959	5	10	MDM2; PSMA6; PSMC1; PSMD3; TP53
GO_REGULATION_OF_WNT_SIGNALING_PATHWAY	1	0.0435236	31	91	CAV1; CDH3; CTNND1; CUL3; DAB2IP; DISC1; EGFR; ESR1; FGFR2; FZD6; GNAQ; GSK3A; JUP; LRP1; NRARP; PRDM15; PSMA6; PSMC1; PSMD3; RUNX1; SFRP1; SFRP4; SOST; SRC; TBL1XR1; TSKU; WNT5A
GO_ACTIVATION_OF_PHOSPHOLIPASE_D_ACTIVITY	1	0.0445417	3	5	GNA13
GO_CARDIAC_ATRIUM_DEVELOPMENT	1	0.0445417	3	5	MDM2; WNT5A
GO_CELL_FATE_DETERMINATION	1	0.0445417	3	5	HES1; TBX2
GO_CEREBRAL_CORTEX_TANGENTIAL_MIGRATION	1	0.0445417	3	5	ARX; NRP2
GO_CONVERGENT_EXTENSION	1	0.0445417	3	5	SFRP1; WNT5A
GO_CONVERGENT_EXTENSION_INVOLVED_IN_AXIS_ELONGATION	1	0.0445417	3	5	SFRP1; WNT5A
GO_DESMOSOME_ORGANIZATION	1	0.0445417	3	5	JUP; PKP3; PRKCA
GO_ENTRAINMENT_OF_CIRCADIAN_CLOCK	1	0.0445417	3	5	GNAQ; NR2F6; TP53
GO_ESTABLISHMENT_OF_ENDOTHELIAL_BARRIER	1	0.0445417	3	5	S1PR3; SOX18; TNFRSF1A
GO_FEMALE_GENITALIA_DEVELOPMENT	1	0.0445417	3	5	ESR1; WNT5A
GO_HINDGUT_DEVELOPMENT	1	0.0445417	3	5	GLI2; WNT5A
GO_INTERLEUKIN_21_MEDIATED_SIGNALING_PATHWAY	1	0.0445417	3	5	JAK1; STAT3
GO_LYMPH_VESSEL_DEVELOPMENT	1	0.0445417	3	5	NR2F2; SOX18; VEGFA
GO_MAINTENANCE_OF_PROTEIN_LOCATION_IN_NUCLEUS	1	0.0445417	3	5	MORC3; SKP1; TXN
GO_MELANIN_BIOSYNTHETIC_PROCESS	1	0.0445417	3	5	CDH3; WNT5A
GO_NEGATIVE_REGULATION_OF_AXON_EXTENSION	1	0.0445417	3	5	SEMA4B; WNT5A
GO_NEGATIVE_REGULATION_OF_AXON_GUIDANCE	1	0.0445417	3	5	SEMA4B; WNT5A
GO_NEGATIVE_REGULATION_OF_DNA_BIOSYNTHETIC_PROCESS	1	0.0445417	3	5	MEN1; SRC; TP53
GO_NEGATIVE_REGULATION_OF_INTRINSIC_APOPTOTIC_SIGNALING_PATHWAY_BY_P53_CLASS_MEDIATOR	1	0.0445417	3	5	CD74; MDM2; MUC1
GO_NEGATIVE_REGULATION_OF_JUN_KINASE_ACTIVITY	1	0.0445417	3	5	PDCD4; SFRP1
GO_NEGATIVE_REGULATION_OF_SYNAPSE_ORGANIZATION	1	0.0445417	3	5	FYN; WNT5A
GO_NEGATIVE_REGULATION_OF_TELOMERASE_ACTIVITY	1	0.0445417	3	5	MEN1; SRC; TP53
GO_NOTOCHORD_MORPHOGENESIS	1	0.0445417	3	5	GLI2; WNT5A
GO_PLASMA_MEMBRANE_RAFT_ASSEMBLY	1	0.0445417	3	5	CAV1; FLOT1; PACSIN2
GO_POSITIVE_REGULATION_OF_ENDOTHELIAL_CELL_DIFFERENTIATION	1	0.0445417	3	5	ETV2; VEZF1
GO_POSITIVE_REGULATION_OF_MESONEPHROS_DEVELOPMENT	1	0.0445417	3	5	HOXB7; MAGED1; VEGFA
GO_PROSTATIC_BUD_FORMATION	1	0.0445417	3	5	GLI2; WNT5A
GO_PYRIMIDINE_RIBONUCLEOTIDE_BIOSYNTHETIC_PROCESS	1	0.0445417	3	5	CAD; DHODH; UCKL1
GO_REGULATION_OF_EXECUTION_PHASE_OF_APOPTOSIS	1	0.0445417	3	5	DFFA; DLC1; TP53
GO_REGULATION_OF_INTRINSIC_APOPTOTIC_SIGNALING_PATHWAY_BY_P53_CLASS_MEDIATOR	1	0.0445417	3	5	CD74; MDM2; MUC1
GO_REGULATION_OF_MESONEPHROS_DEVELOPMENT	1	0.0445417	3	5	HOXB7; MAGED1; VEGFA
GO_REGULATION_OF_POSTSYNAPTIC_NEUROTRANSMITTER_RECEPTOR_ACTIVITY	1	0.0445417	3	5	AKAP9; CACNG4; SRC
GO_RESPONSE_TO_HYPEROXIA	1	0.0445417	3	5	CAV1; CDKN1A; POLG
GO_RESPONSE_TO_INCREASED_OXYGEN_LEVELS	1	0.0445417	3	5	CAV1; CDKN1A; POLG
GO_RESPONSE_TO_INTERLEUKIN_15	1	0.0445417	3	5	JAK1; STAT3
GO_RESPONSE_TO_INTERLEUKIN_9	1	0.0445417	3	5	JAK1; STAT3
GO_RESPONSE_TO_PROSTAGLANDIN_E	1	0.0445417	3	5	AKAP8; SFRP1
GO_RNA_POLYADENYLATION	1	0.0445417	3	5	MTPAP; PABPC1; PAF1
GO_SECONDARY_METABOLITE_BIOSYNTHETIC_PROCESS	1	0.0445417	3	5	CDH3; WNT5A
GO_VAGINA_DEVELOPMENT	1	0.0445417	3	5	ESR1; WNT5A
GO_VITAMIN_D_RECEPTOR_SIGNALING_PATHWAY	1	0.0445417	3	5	CYP27B1; PIM1
REACTOME_ASSOCIATION_OF_TRIC_CCT_WITH_TARGET_PROTEINS_DURING_BIOSYNTHESIS	1	0.0445417	3	5	CCNE1; STAT3; TP53
REACTOME_DEADENYLATION_OF_MRNA	1	0.0445417	3	5	EIF4A1; PABPC1; PAIP1
REACTOME_INTERLEUKIN_15_SIGNALING	1	0.0445417	3	5	JAK1; STAT3
REACTOME_INTERLEUKIN_21_SIGNALING	1	0.0445417	3	5	JAK1; STAT3
REACTOME_INTERLEUKIN_9_SIGNALING	1	0.0445417	3	5	JAK1; STAT3
REACTOME_TRANSPORT_OF_VITAMINS_NUCLEOSIDES_AND_RELATED_MOLECULES	1	0.0445417	3	5	LCN12; SLC35B2
GO_NEGATIVE_REGULATION_OF_CELLULAR_AMIDE_METABOLIC_PROCESS	1	0.0456182	18	49	ABCA7; ANG; BTG2; CPEB2; CPEB4; EIF2AK4; EIF4EBP1; MIR365B; RARA; STAT3; SYNCRIP; TNRC6C; ZFP36; ZFP36L2
GO_CELLULAR_RESPONSE_TO_NUTRIENT	1	0.0489203	6	13	CYP27B1; FYN; MDM2; PIM1; SFRP1
GO_NEURON_FATE_COMMITMENT	1	0.0489203	6	13	FOXA1; GLI2; HES1; NOTCH3
GO_POSITIVE_REGULATION_OF_INTRINSIC_APOPTOTIC_SIGNALING_PATHWAY	1	0.0489203	6	13	CAV1; NACC2; PLEKHF1; SERINC3; TP53
GO_REGULATION_OF_CELL_FATE_COMMITMENT	1	0.0489203	6	13	FGFR2; SPDEF
GO_RESPONSE_TO_GAMMA_RADIATION	1	0.0489203	6	13	MDM2; MEN1; POLG; TP53; TSPYL5
GO_TUBE_MORPHOGENESIS	1	0.0491805	67	215	ANG; CAV1; CELSR1; DAB2IP; DLC1; EGFL7; EGFR; EGR3; EMP2; ESR1; ETV2; FGFR2; FOXA1; FOXD1; FOXN1; FZD6; GLI2; GNA13; GZF1; HDAC5; HES1; HIF1A; HOXB3; HOXB7; JAK1; JUNB; JUP; LRP1; MAGED1; MYH9; NOTCH3; NR2F2; NRARP; NRP2; PAK1; PAK4; PRKCA; RARA; RHOB; RUNX1; SFRP1; SOX18; SRC; STAT3; TBX2; TFAP2B; TNFAIP2; VEGFA; VEZF1; WNT5A; ZMIZ1

## Sheet: S10.3
mutation_type	CRISPRi_hit_type	observed_overlap	expected_overlap	odds_ratio	pvalue
Both	Expanded_RM_significant	0.027	0.011	2.45455	0.102
Both	Expanded_RM_vs_WM_significant	0	0.001	0	0.77
Both	Exhausted_RM_significant	0.1	0.078	1.28205	0.396
Both	Exhausted_RM_vs_WM_significant	0.009	0.013	0.692308	0.691
Both	Expanded_WM_significant	0.082	0.028	2.92857	0.000713
Both	Expanded_WM_vs_RM_significant	0.018	0.007	2.57143	0.168
Both	Exhausted_WM_significant	0.045	0.05	0.9	0.842
Both	Exhausted_WM_vs_RM_significant	0	0.002	0	0.669
Both	Exhausted_LTED_significant	0.273	0.139	1.96403	5.33e-05
Both	Expanded_LTED_significant	0.291	0.149	1.95302	2.73e-05
INDEL_short	Expanded_RM_significant	0.059	0.011	5.36364	0.0586
INDEL_short	Expanded_RM_vs_WM_significant	0	0.001	0	0.909
INDEL_short	Exhausted_RM_significant	0.059	0.078	0.75641	0.766
INDEL_short	Exhausted_RM_vs_WM_significant	0	0.013	0	0.63
INDEL_short	Expanded_WM_significant	0	0.028	0	0.482
INDEL_short	Expanded_WM_vs_RM_significant	0	0.007	0	0.727
INDEL_short	Exhausted_WM_significant	0	0.05	0	0.346
INDEL_short	Exhausted_WM_vs_RM_significant	0	0.002	0	0.867
INDEL_short	Exhausted_LTED_significant	0.235	0.139	1.69065	0.253
INDEL_short	Expanded_LTED_significant	0.353	0.149	2.36913	0.0179
SNV	Expanded_RM_significant	0.031	0.011	2.81818	0.126
SNV	Expanded_RM_vs_WM_significant	0	0.001	0	0.822
SNV	Exhausted_RM_significant	0.077	0.078	0.987179	0.968
SNV	Exhausted_RM_vs_WM_significant	0.015	0.013	1.15385	0.893
SNV	Expanded_WM_significant	0.108	0.028	3.85714	0.000114
SNV	Expanded_WM_vs_RM_significant	0	0.007	0	0.495
SNV	Exhausted_WM_significant	0.046	0.05	0.92	0.898
SNV	Exhausted_WM_vs_RM_significant	0	0.002	0	0.743
SNV	Exhausted_LTED_significant	0.277	0.139	1.99281	0.00136
SNV	Expanded_LTED_significant	0.308	0.149	2.06711	0.000312
