# Supplementary material for: Genetic and epigenetic driven variation in regulatory regions activity contribute to adaptation and evolution under endocrine treatment
Source: Research Square preprint supplement (doi:10.21203/rs.3.rs-1432636/v1), 2022-03-30
Supplement: Supplementary file 6 [file dbc1d182f007a3d9bee88e3c.xlsx]

## Sheet: S12
TF	category	observed_fraction	expected_fraction	pvalue	fraction_delta	classification
AHR	increased_affinity	0.01	0.00831	0.373139	0.00169	ns
AHR	decreased_affinity	0.00996	0.03117	2.62246e-33	-0.02121	decreased_affinity_less_than_exp
ARNT	increased_affinity	0.01	0.00801	0.287861	0.00199	ns
ARNT	decreased_affinity	0.00994	0.04156	1.69746e-71	-0.03162	decreased_affinity_less_than_exp
CLOCK	increased_affinity	0.01001	0.00594	0.0233755	0.00407	ns
CLOCK	decreased_affinity	0.00998	0.02196	1.11742e-11	-0.01198	decreased_affinity_less_than_exp
CREB1	increased_affinity	0.00986	0.07866	2.095e-300	-0.0688	increased_affinity_less_than_exp
CREB1	decreased_affinity	0.01002	0.00416	0.000954568	0.00586	ns
CTCF	increased_affinity	0.01001	0.00683	0.0800106	0.00318	ns
CTCF	decreased_affinity	0.00999	0.01395	0.0283084	-0.00396	ns
CTCF	increased_affinity	0.01001	0.00653	0.0545078	0.00348	ns
CTCF	decreased_affinity	0.00999	0.01722	4.69318e-05	-0.00723	ns
CTCF	increased_affinity	0.01001	0.00445	0.00175232	0.00556	ns
CTCF	decreased_affinity	0.00999	0.01603	0.000703012	-0.00604	ns
CTCF	increased_affinity	0.01001	0.00742	0.159495	0.00259	ns
CTCF	decreased_affinity	0.00999	0.01573	0.00129188	-0.00574	ns
CUX1	increased_affinity	0.00999	0.01276	0.131352	-0.00277	ns
CUX1	decreased_affinity	0.01	0.00801	0.288004	0.00199	ns
E2F1	increased_affinity	0.01001	0.00505	0.00536408	0.00496	ns
E2F1	decreased_affinity	0.00993	0.04482	1.84936e-86	-0.03489	decreased_affinity_less_than_exp
ELF1	increased_affinity	0.01001	0.00683	0.0800106	0.00318	ns
ELF1	decreased_affinity	0.00997	0.02671	2.13841e-21	-0.01674	decreased_affinity_less_than_exp
ELK1	increased_affinity	0.01001	0.00327	0.000133539	0.00674	ns
ELK1	decreased_affinity	0.00992	0.04987	2.53369e-112	-0.03995	decreased_affinity_less_than_exp
ESR1	increased_affinity	0.01	0.00831	0.373139	0.00169	ns
ESR1	decreased_affinity	0.01001	0.00653	0.0545078	0.00348	ns
ESR1	increased_affinity	0.00999	0.01573	0.00129188	-0.00574	ns
ESR1	decreased_affinity	0.01001	0.00623	0.0361723	0.00378	ns
ESR1	increased_affinity	0.00999	0.01722	4.69318e-05	-0.00723	ns
ESR1	decreased_affinity	0.01001	0.00742	0.159586	0.00259	ns
ESR1	increased_affinity	0.01	0.01128	0.514125	-0.00128	ns
ESR1	decreased_affinity	0.01	0.01039	0.890236	-0.00039	ns
ESR1	increased_affinity	0.00998	0.02167	3.57096e-11	-0.01169	increased_affinity_less_than_exp
ESR1	decreased_affinity	0.01	0.01098	0.630514	-0.00098	ns
ESR1	increased_affinity	0.01001	0.00445	0.00175232	0.00556	ns
ESR1	decreased_affinity	0.00999	0.01722	4.69318e-05	-0.00723	ns
ESR1	increased_affinity	0.01001	0.00534	0.00900388	0.00467	ns
ESR1	decreased_affinity	0.01	0.01128	0.514125	-0.00128	ns
ESR1	increased_affinity	0.01	0.00772	0.21703	0.00228	ns
ESR1	decreased_affinity	0.01	0.0098	0.974586	0.0002	ns
ESR1	increased_affinity	0.01001	0.00594	0.0233755	0.00407	ns
ESR1	decreased_affinity	0.00999	0.01365	0.0431751	-0.00366	ns
ESR1	increased_affinity	0.01	0.0092	0.707507	0.0008	ns
ESR1	decreased_affinity	0.01	0.01009	1	-9e-05	ns
ESR1	increased_affinity	0.00999	0.01692	9.62017e-05	-0.00693	ns
ESR1	decreased_affinity	0.01	0.00772	0.21703	0.00228	ns
ESR1	increased_affinity	0.00999	0.01306	0.0929736	-0.00307	ns
ESR1	decreased_affinity	0.01	0.0092	0.707507	0.0008	ns
ESRRA	increased_affinity	0.01001	0.00534	0.00900388	0.00467	ns
ESRRA	decreased_affinity	0.00998	0.02196	1.11742e-11	-0.01198	decreased_affinity_less_than_exp
ESRRA	increased_affinity	0.01001	0.00623	0.0361471	0.00378	ns
ESRRA	decreased_affinity	0.00999	0.01692	9.62017e-05	-0.00693	ns
FOS	increased_affinity	0.00988	0.06738	2.77392e-227	-0.0575	increased_affinity_less_than_exp
FOS	decreased_affinity	0.01001	0.00712	0.114446	0.00289	ns
FOXA1	increased_affinity	0.01	0.0089	0.584182	0.0011	ns
FOXA1	decreased_affinity	0.00999	0.01395	0.0283084	-0.00396	ns
FOXA1	increased_affinity	0.01	0.00801	0.288004	0.00199	ns
FOXA1	decreased_affinity	0.00999	0.01276	0.131352	-0.00277	ns
FOXA1	increased_affinity	0.01001	0.00742	0.159586	0.00259	ns
FOXA1	decreased_affinity	0.00999	0.01454	0.0112517	-0.00455	ns
FOXA1	increased_affinity	0.01	0.01187	0.319676	-0.00187	ns
FOXA1	decreased_affinity	0.01005	0.01484	0.00773288	-0.00479	ns
FOXA1	increased_affinity	0.01	0.0092	0.707507	0.0008	ns
FOXA1	decreased_affinity	0.00999	0.01573	0.00129188	-0.00574	ns
FOXM1	increased_affinity	0.01	0.00861	0.47229	0.00139	ns
FOXM1	decreased_affinity	0.00998	0.01929	1.42496e-07	-0.00931	decreased_affinity_less_than_exp
GATA3	increased_affinity	0.01001	0.00623	0.0361723	0.00378	ns
GATA3	decreased_affinity	0.00998	0.02226	3.40047e-12	-0.01228	decreased_affinity_less_than_exp
GATA3	increased_affinity	0.01016	0.00742	0.137443	0.00274	ns
GATA3	decreased_affinity	0.01	0.02226	4.11836e-12	-0.01226	decreased_affinity_less_than_exp
GATA3	increased_affinity	0.01001	0.00594	0.0233755	0.00407	ns
GATA3	decreased_affinity	0.01	0.01187	0.319676	-0.00187	ns
GRHL2	increased_affinity	0.01	0.00831	0.373139	0.00169	ns
GRHL2	decreased_affinity	0.01	0.01128	0.514125	-0.00128	ns
GRHL2	increased_affinity	0.01001	0.00742	0.159586	0.00259	ns
GRHL2	decreased_affinity	0.00999	0.01722	4.69318e-05	-0.00723	ns
HES1	increased_affinity	0.00996	0.02909	2.05697e-27	-0.01913	increased_affinity_less_than_exp
HES1	decreased_affinity	0.01	0.0098	0.974586	0.0002	ns
HIF1A	increased_affinity	0.01	0.0095	0.838739	0.0005	ns
HIF1A	decreased_affinity	0.00998	0.01751	2.22745e-05	-0.00753	ns
HOXB7	increased_affinity	0.01	0.0092	0.707507	0.0008	ns
HOXB7	decreased_affinity	0.00995	0.03621	4.71629e-50	-0.02626	decreased_affinity_less_than_exp
HSF1	increased_affinity	0.01001	0.00683	0.0800106	0.00318	ns
HSF1	decreased_affinity	0.00997	0.02553	1.12093e-18	-0.01556	decreased_affinity_less_than_exp
JUN	increased_affinity	0.01001	0.00505	0.00536408	0.00496	ns
JUN	decreased_affinity	0.00998	0.01811	4.61908e-06	-0.00813	decreased_affinity_less_than_exp
MAFK	increased_affinity	0.00995	0.03621	4.71629e-50	-0.02626	increased_affinity_less_than_exp
MAFK	decreased_affinity	0.01002	0.00594	0.0229365	0.00408	ns
MAZ	increased_affinity	0.01001	0.00416	0.000960503	0.00585	ns
MAZ	decreased_affinity	0.00995	0.03443	9.44137e-44	-0.02448	decreased_affinity_less_than_exp
MNT	increased_affinity	0.00992	0.04898	1.76287e-107	-0.03906	increased_affinity_less_than_exp
MNT	decreased_affinity	0.01001	0.00683	0.0800106	0.00318	ns
MYC	increased_affinity	0.00994	0.04007	3.68674e-65	-0.03013	increased_affinity_less_than_exp
MYC	decreased_affinity	0.01001	0.00356	0.000264947	0.00645	ns
MYC	increased_affinity	0.00994	0.04185	8.46263e-73	-0.03191	increased_affinity_less_than_exp
MYC	decreased_affinity	0.01001	0.00327	0.000133539	0.00674	ns
MYC	increased_affinity	0.00993	0.04541	2.4906e-89	-0.03548	increased_affinity_less_than_exp
MYC	decreased_affinity	0.01002	0.00267	3.10779e-05	0.00735	ns
MYC	increased_affinity	0.00993	0.04245	1.9412e-75	-0.03252	increased_affinity_less_than_exp
MYC	decreased_affinity	0.01001	0.00416	0.000960503	0.00585	ns
NEUROD1	increased_affinity	0.00998	0.01781	1.02844e-05	-0.00783	ns
NEUROD1	decreased_affinity	0.01	0.01069	0.757189	-0.00069	ns
NEUROD1	increased_affinity	0.00998	0.019	3.54455e-07	-0.00902	increased_affinity_less_than_exp
NEUROD1	decreased_affinity	0.01	0.00801	0.288004	0.00199	ns
NFIB	increased_affinity	0.00992	0.05076	3.14255e-117	-0.04084	increased_affinity_less_than_exp
NFIB	decreased_affinity	0.01017	0.00831	0.329069	0.00186	ns
NR3C1	increased_affinity	0.00995	0.03592	5.66728e-49	-0.02597	increased_affinity_less_than_exp
NR3C1	decreased_affinity	0.01	0.00831	0.373139	0.00169	ns
PBX1	increased_affinity	0.01001	0.00445	0.00175081	0.00556	ns
PBX1	decreased_affinity	0.00997	0.02404	1.50424e-15	-0.01407	decreased_affinity_less_than_exp
PKNOX1	increased_affinity	0.01	0.00772	0.21703	0.00228	ns
PKNOX1	decreased_affinity	0.00991	0.05373	2.55044e-134	-0.04382	decreased_affinity_less_than_exp
PKNOX1	increased_affinity	0.01	0.0092	0.707258	0.0008	ns
PKNOX1	decreased_affinity	0.00999	0.01573	0.00129188	-0.00574	ns
RFX1	increased_affinity	0.01001	0.00564	0.0147056	0.00437	ns
RFX1	decreased_affinity	0.00996	0.02909	2.05697e-27	-0.01913	decreased_affinity_less_than_exp
RFX5	increased_affinity	0.01001	0.00742	0.159586	0.00259	ns
RFX5	decreased_affinity	0.00998	0.01929	1.42496e-07	-0.00931	decreased_affinity_less_than_exp
RUNX1	increased_affinity	0.01002	0.00208	6.44594e-06	0.00794	increased_affinity_more_than_exp
RUNX1	decreased_affinity	0.00996	0.03295	8.18565e-39	-0.02299	decreased_affinity_less_than_exp
SMAD2	increased_affinity	0.01001	0.00356	0.000265192	0.00645	ns
SMAD2	decreased_affinity	0.00995	0.03235	6.13164e-37	-0.0224	decreased_affinity_less_than_exp
SMAD2	increased_affinity	0.01	0.00801	0.288004	0.00199	ns
SMAD2	decreased_affinity	0.00998	0.01989	2.11877e-08	-0.00991	decreased_affinity_less_than_exp
SPDEF	increased_affinity	0.01001	0.00564	0.0147056	0.00437	ns
SPDEF	decreased_affinity	0.00998	0.02196	1.12167e-11	-0.01198	decreased_affinity_less_than_exp
SREBF1	increased_affinity	0.00985	0.08638	0	-0.07653	increased_affinity_less_than_exp
SREBF1	decreased_affinity	0.01002	0.0003	2.84218e-08	0.00972	decreased_affinity_more_than_exp
TCF7L2	increased_affinity	0.01	0.00861	0.47229	0.00139	ns
TCF7L2	decreased_affinity	0.00999	0.01722	4.69318e-05	-0.00723	ns
TFAP2C	increased_affinity	0.01001	0.00653	0.0545078	0.00348	ns
TFAP2C	decreased_affinity	0.00998	0.02107	3.35439e-10	-0.01109	decreased_affinity_less_than_exp
TFAP2C	increased_affinity	0.01001	0.00564	0.0147056	0.00437	ns
TFAP2C	decreased_affinity	0.00997	0.02582	2.4423e-19	-0.01585	decreased_affinity_less_than_exp
TP63	increased_affinity	0.00985	0.08667	0	-0.07682	increased_affinity_less_than_exp
TP63	decreased_affinity	0.01	0.00831	0.372967	0.00169	ns
XBP1	increased_affinity	0.01	0.01217	0.243454	-0.00217	ns
XBP1	decreased_affinity	0.00999	0.01306	0.0929736	-0.00307	ns
ZBTB7B	increased_affinity	0.01002	0.00267	3.10779e-05	0.00735	ns
ZBTB7B	decreased_affinity	0.00994	0.03888	2.66699e-60	-0.02894	decreased_affinity_less_than_exp
ZFX	increased_affinity	0.00996	0.0276	1.45864e-23	-0.01764	increased_affinity_less_than_exp
ZFX	decreased_affinity	0.00998	0.019	3.54455e-07	-0.00902	decreased_affinity_less_than_exp
ZKSCAN1	increased_affinity	0.01001	0.00594	0.0233755	0.00407	ns
ZKSCAN1	decreased_affinity	0.00998	0.0184	2.01801e-06	-0.00842	decreased_affinity_less_than_exp
